# Supplementary material for: Multicomponent Domino Cyclization of Ethyl Trifluoropyruvate with Methyl Ketones and Amino Alcohols as A New Way to γ-Lactam Annulated Oxazacycles
Source: MDPI journal article supplement (doi:10.3390/molecules28041983), 2023-02-20
Supplement: s1 [file s1]

# Supporting Information

## Multicomponent domino cyclization of ethyl trifluoropyruvate with methyl ketones and amino alcohols – a new way to $\gamma$ -lactam annulated oxazacycles

Marina V. Goryaeva <sup>1</sup>, Olesya A. Fefelova <sup>1</sup>, Yanina V. Burgart <sup>1</sup>, Marina A. Ezhikova <sup>1</sup>, Mikhail I. Kodess <sup>1</sup>, Pavel A. Slepukhin <sup>1</sup>, Vasily S. Gaviko <sup>2</sup>, Victor I. Saloutin <sup>1,\*</sup>

<sup>1</sup>Postovsky Institute of Organic Synthesis of the Ural Branch of the Russian Academy of Science (IOS UB RAS), S. Kovalevskoi St., 22, Ekaterinburg 620108, Russia.

<sup>2</sup>M.N. Mikheev Institute of Metal Physics of the Ural Branch of the Russian Academy of Sciences (IMP UB RAS), S. Kovalevskoi St., 18, Ekaterinburg 620108, Russia.

\*Correspondence: saloutin@ios.uran.ru

### Contents

|                                                                                                |   |
|------------------------------------------------------------------------------------------------|---|
| 1. Crystallographic parameters and X-ray experiment X-ray details                              |   |
| (Tables S1, S2).....                                                                           | 2 |
| 2. Copies of <sup>1</sup> H, <sup>13</sup> C and <sup>19</sup> F NMR spectra for all compounds |   |
| (Figures S1-S65).....                                                                          | 4 |

**Table S1.** Crystallographic parameters and X-ray experiment details for **4d<sup>c</sup>**, **5<sup>tc</sup>**.

| <b>Compound</b>                             | <b>4d<sup>c</sup></b>                                          | <b>5<sup>tc</sup></b>                                          |
|---------------------------------------------|----------------------------------------------------------------|----------------------------------------------------------------|
| Empirical formula                           | C <sub>13</sub> H <sub>12</sub> F <sub>3</sub> NO <sub>3</sub> | C <sub>13</sub> H <sub>15</sub> F <sub>6</sub> NO <sub>6</sub> |
| Formula weight                              | 287.24                                                         | 395.26                                                         |
| Temperature/K                               | 295(2)                                                         | 295(2)                                                         |
| Crystal system                              | triclinic                                                      | monoclinic                                                     |
| Space group                                 | P-1                                                            | P2 <sub>1</sub> /n                                             |
| a/Å                                         | 6.0290(7)                                                      | 10.8844(8)                                                     |
| b/Å                                         | 8.1542(10)                                                     | 13.1919(9)                                                     |
| c/Å                                         | 13.4778(17)                                                    | 11.3734(9)                                                     |
| α/°                                         | 79.481(10)                                                     | 90                                                             |
| β/°                                         | 86.443(10)                                                     | 92.641(7)                                                      |
| γ/°                                         | 75.029(10)                                                     | 90                                                             |
| Volume/Å <sup>3</sup>                       | 629.27(14)                                                     | 1631.3(2)                                                      |
| Z                                           | 2                                                              | 4                                                              |
| ρ <sub>calc</sub> /cm <sup>3</sup>          | 1.516                                                          | 1.609                                                          |
| μ/mm <sup>-1</sup>                          | 0.136                                                          | 0.167                                                          |
| F(000)                                      | 296.0                                                          | 808.0                                                          |
| Crystal size/mm <sup>3</sup>                | 0.41 × 0.29 × 0.17                                             | 0.45 × 0.29 × 0.13                                             |
| Radiation                                   | MoKα (λ = 0.71073)                                             | MoKα (λ = 0.71073)                                             |
| 2Θ range for data collection/°              | 7.366 to 61.83                                                 | 7.144 to 62.028                                                |
| Index ranges                                | -8 ≤ h ≤ 8, -11 ≤ k ≤ 10, -15 ≤ l ≤ 18                         | -15 ≤ h ≤ 13, -17 ≤ k ≤ 18, -16 ≤ l ≤ 15                       |
| Reflections collected                       | 5481                                                           | 11283                                                          |
| Independent reflections                     | 3339 [R <sub>int</sub> = 0.0434, R <sub>sigma</sub> = 0.0881]  | 4404 [R <sub>int</sub> = 0.0496, R <sub>sigma</sub> = 0.0604]  |
| Data/restraints/parameters                  | 3339/0/186                                                     | 4404/0/245                                                     |
| Goodness-of-fit on F <sup>2</sup>           | 1.015                                                          | 1.003                                                          |
| Final R indexes [I ≥ 2σ (I)]                | R <sub>1</sub> = 0.0702, wR <sub>2</sub> = 0.1634              | R <sub>1</sub> = 0.0544, wR <sub>2</sub> = 0.1455              |
| Final R indexes [all data]                  | R <sub>1</sub> = 0.1428, wR <sub>2</sub> = 0.2335              | R <sub>1</sub> = 0.1148, wR <sub>2</sub> = 0.2039              |
| Largest diff. peak/hole / e Å <sup>-3</sup> | 0.26/-0.24                                                     | 0.22/-0.21                                                     |

**Table S2.** Crystallographic parameters and X-ray experiment details for **8c<sup>c</sup>**, **11b**.

| <b>Compound</b>                             | <b>8c<sup>c</sup></b>                                          | <b>11b</b>                                                     |
|---------------------------------------------|----------------------------------------------------------------|----------------------------------------------------------------|
| Empirical formula                           | C <sub>12</sub> H <sub>18</sub> F <sub>3</sub> NO <sub>3</sub> | C <sub>15</sub> H <sub>19</sub> NO <sub>6</sub> F <sub>6</sub> |
| Formula weight                              | 281.27                                                         | 423.31                                                         |
| Temperature/K                               | 295(2)                                                         | 295(2)                                                         |
| Crystal system                              | monoclinic                                                     | monoclinic                                                     |
| Space group                                 | P2 <sub>1</sub> /c                                             | P2 <sub>1</sub> /c                                             |
| a/Å                                         | 10.6332(12)                                                    | 19.1431(10)                                                    |
| b/Å                                         | 13.8923(13)                                                    | 6.4882(4)                                                      |
| c/Å                                         | 9.5664(15)                                                     | 16.4430(9)                                                     |
| α/°                                         | 90                                                             | 90                                                             |
| β/°                                         | 102.235(13)                                                    | 107.551(6)                                                     |
| γ/°                                         | 90                                                             | 90                                                             |
| Volume/Å <sup>3</sup>                       | 1381.0(3)                                                      | 1947.2(2)                                                      |
| Z                                           | 4                                                              | 4                                                              |
| ρ <sub>calc</sub> /cm <sup>3</sup>          | 1.353                                                          | 1.444                                                          |
| μ/mm <sup>-1</sup>                          | 0.122                                                          | 0.145                                                          |
| F(000)                                      | 592.0                                                          | 872.0                                                          |
| Crystal size/mm <sup>3</sup>                | 0.44 × 0.36 × 0.28                                             | 0.22 × 0.08 × 0.01                                             |
| Radiation                                   | Mo Kα (λ = 0.71073)                                            | MoKα (λ = 0.71073)                                             |
| 2Θ range for data collection/°              | 7.056 to 61.722                                                | 5 to 52.742                                                    |
| Index ranges                                | -14 ≤ h ≤ 14, -18 ≤ k ≤ 19, -12 ≤ l ≤ 11                       | -23 ≤ h ≤ 23, -8 ≤ k ≤ 8, -20 ≤ l ≤ 20                         |
| Reflections collected                       | 10666                                                          | 15118                                                          |
| Independent reflections                     | 3779 [R <sub>int</sub> = 0.0582, R <sub>sigma</sub> = 0.0803]  | 3972 [R <sub>int</sub> = 0.1526, R <sub>sigma</sub> = 0.0998]  |
| Data/restraints/parameters                  | 3779/0/210                                                     | 3972/12/270                                                    |
| Goodness-of-fit on F <sup>2</sup>           | 0.980                                                          | 1.015                                                          |
| Final R indexes [I ≥ 2σ (I)]                | R <sub>1</sub> = 0.0611, wR <sub>2</sub> = 0.1539              | R <sub>1</sub> = 0.0601, wR <sub>2</sub> = 0.1547              |
| Final R indexes [all data]                  | R <sub>1</sub> = 0.1610, wR <sub>2</sub> = 0.2201              | R <sub>1</sub> = 0.2070, wR <sub>2</sub> = 0.2534              |
| Largest diff. peak/hole / e Å <sup>-3</sup> | 0.30/-0.22                                                     | 0.27/-0.28                                                     |

Copies of  $^1\text{H}$ ,  $^{13}\text{C}$  and  $^{19}\text{F}$  NMR spectra for all compounds

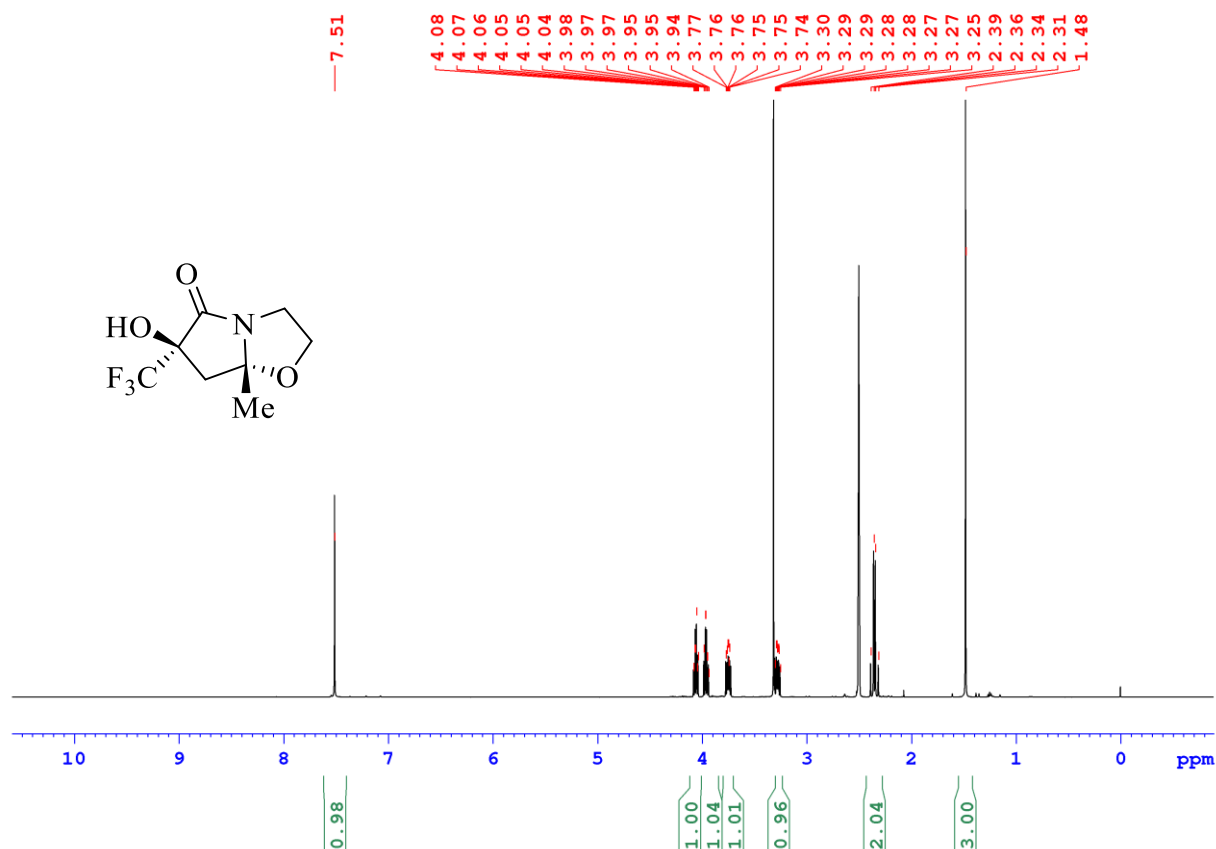

Figure S1.  $^1\text{H}$  NMR spectrum of  $4a^t$ .

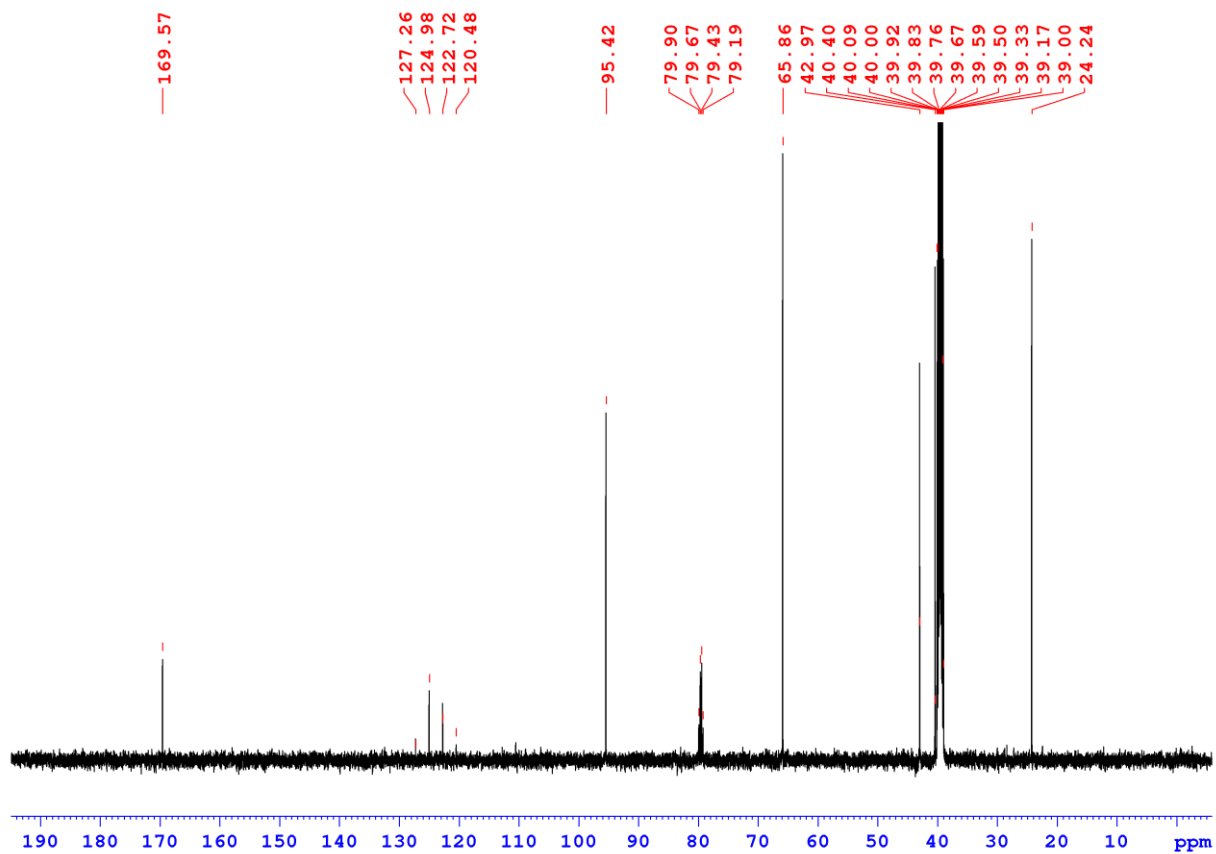

Figure S2.  $^{13}\text{C}$  NMR spectrum of  $4a^t$ .

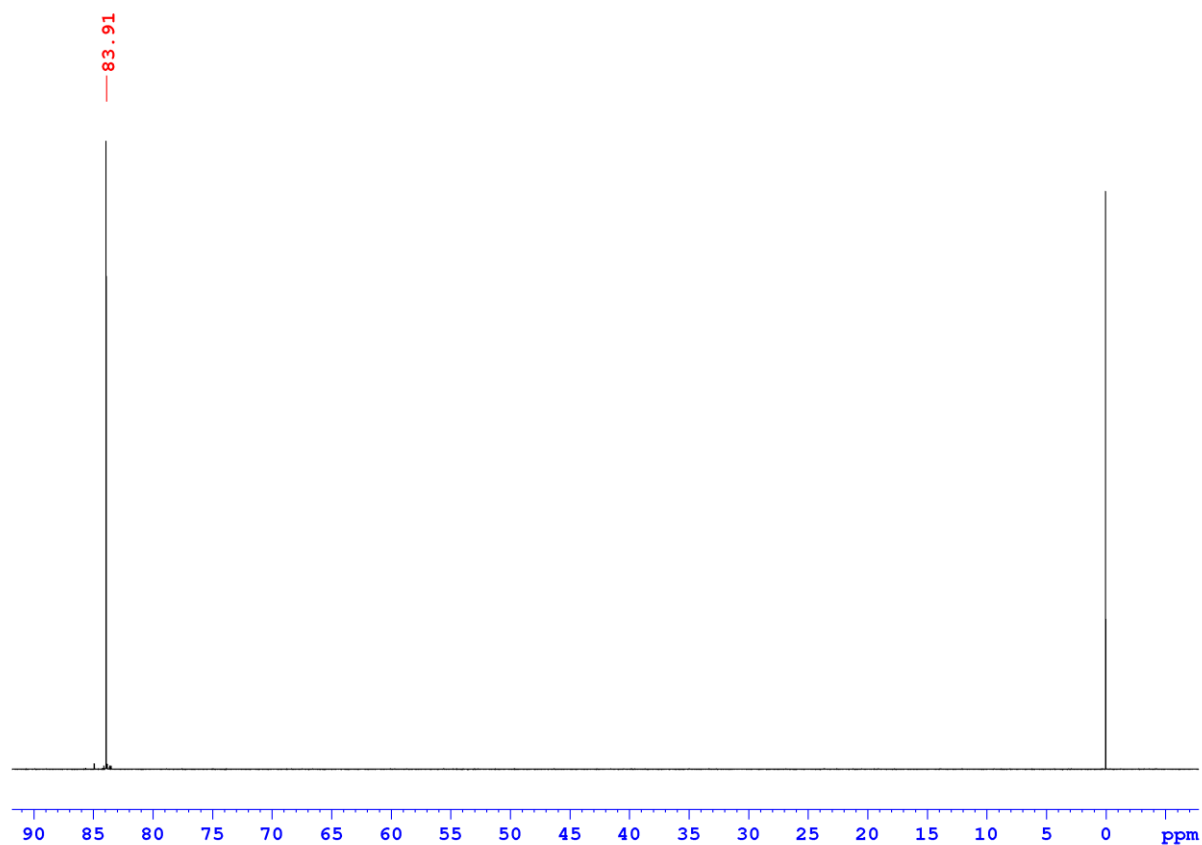

**Figure S3.** <sup>19</sup>F NMR spectrum of **4a<sup>t</sup>**.

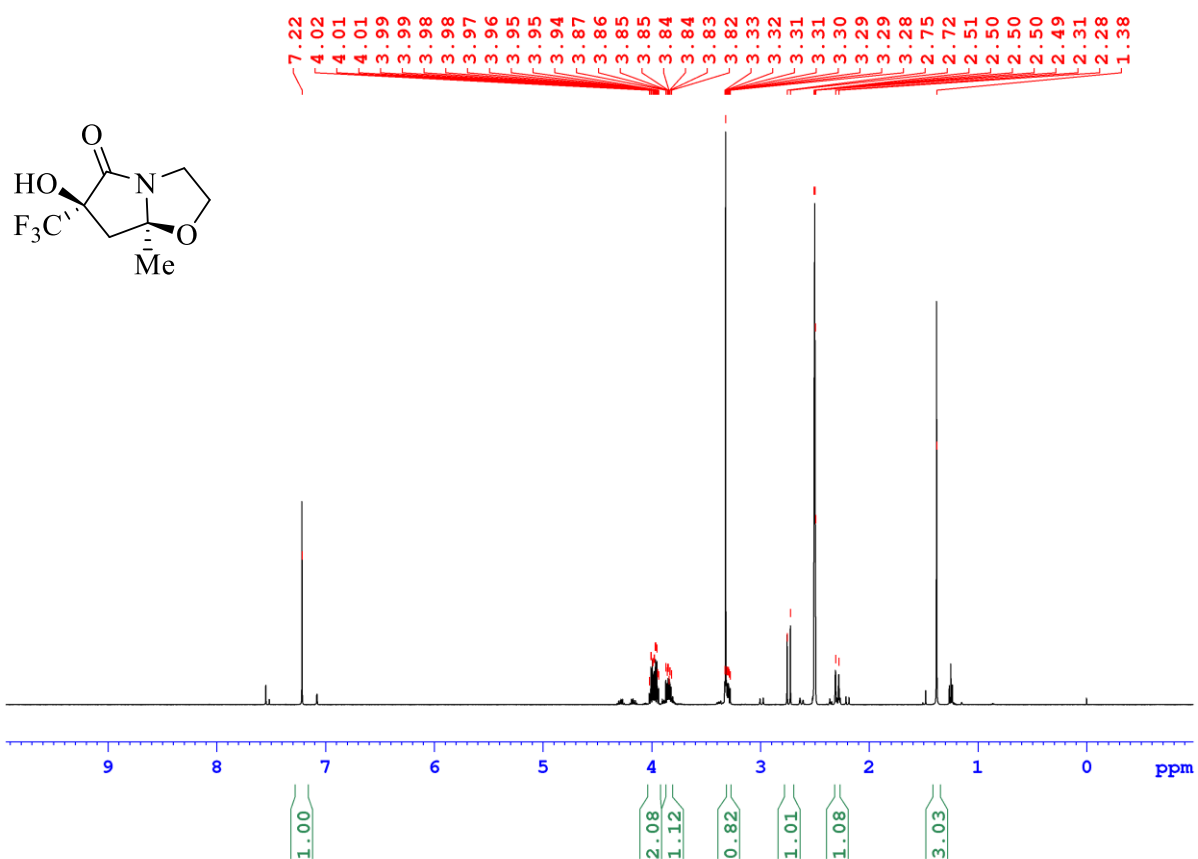

**Figure S4.** <sup>1</sup>H NMR spectrum of **4a<sup>c</sup>** (mixed with **5<sup>ct</sup>** (20%) and **4a<sup>t</sup>** (2%)).

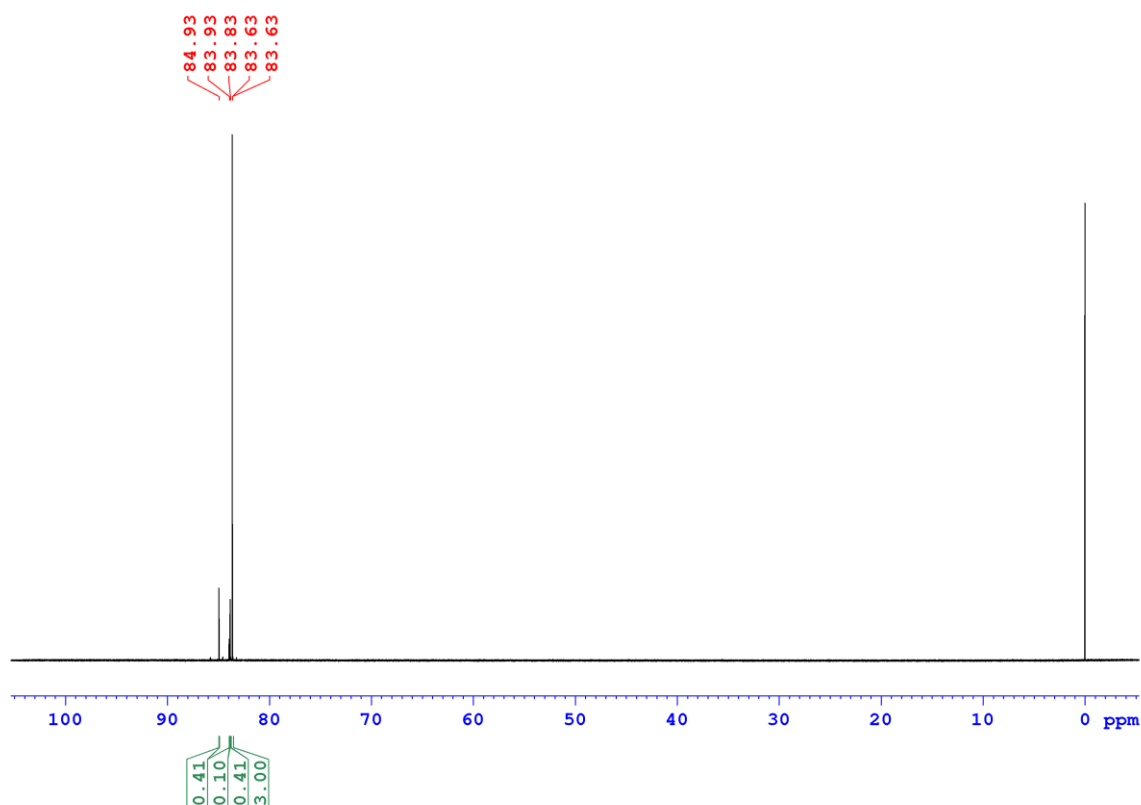

**Figure S5.** <sup>19</sup>F NMR spectrum of **4a<sup>c</sup>** (mixed with **5<sup>ct</sup>** (20%) and **4a<sup>t</sup>** (2%)).

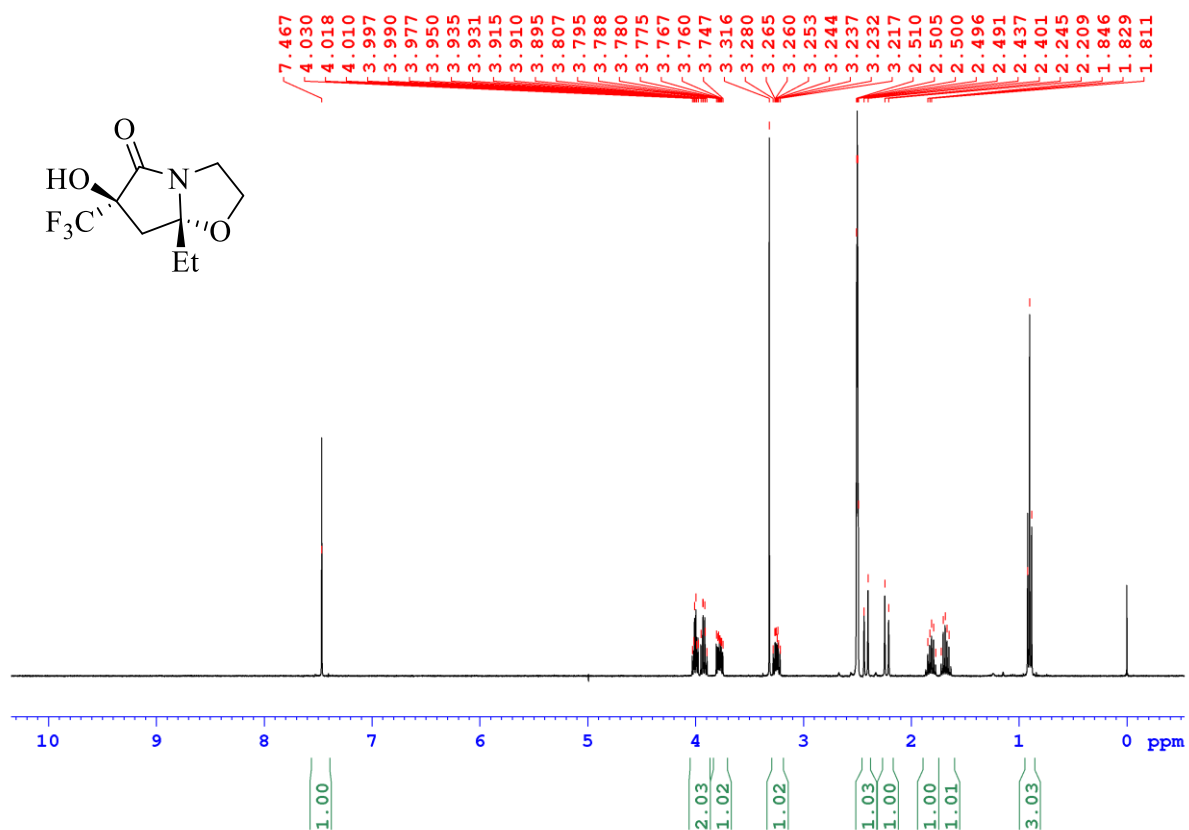

**Figure S6.** <sup>1</sup>H NMR spectrum of **4b<sup>t</sup>**.

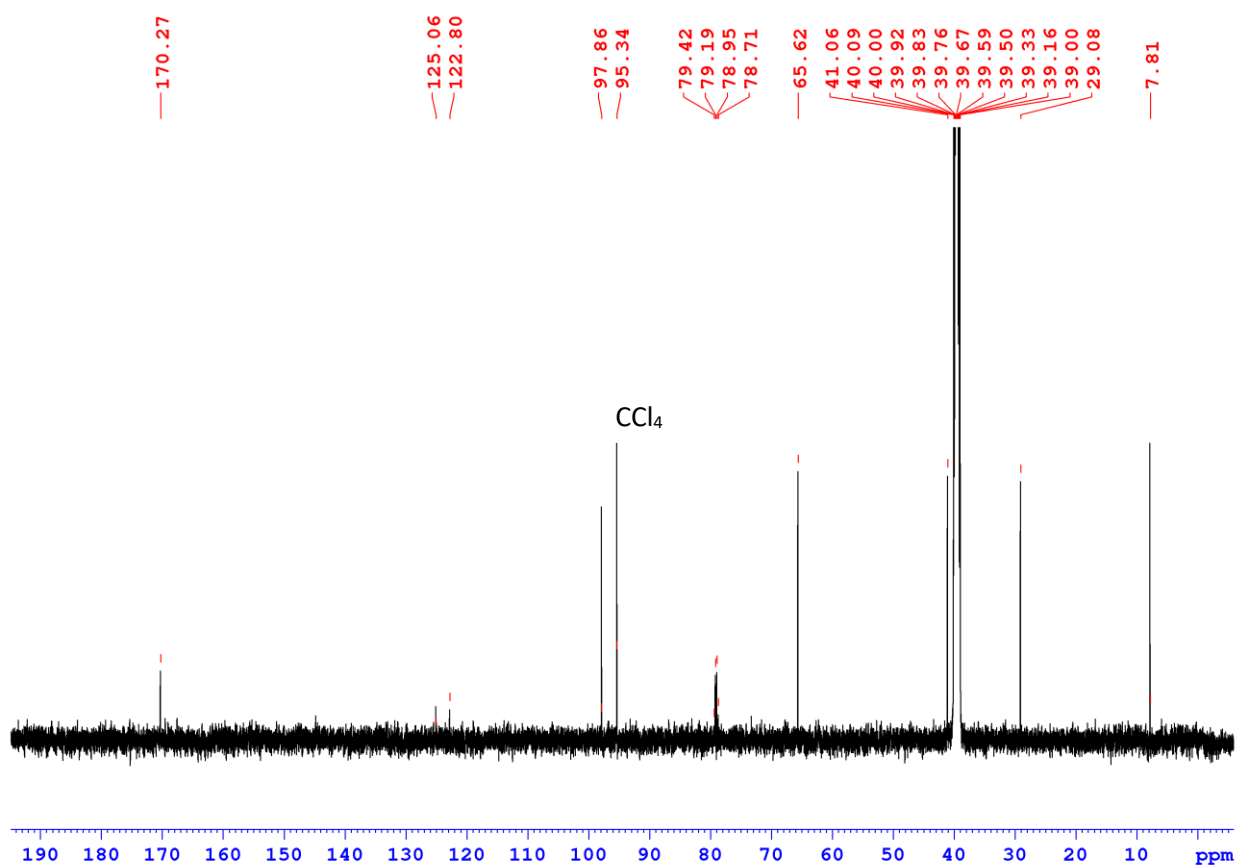

**Figure S7.** <sup>1</sup>H NMR spectrum of **4b<sup>t</sup>**.

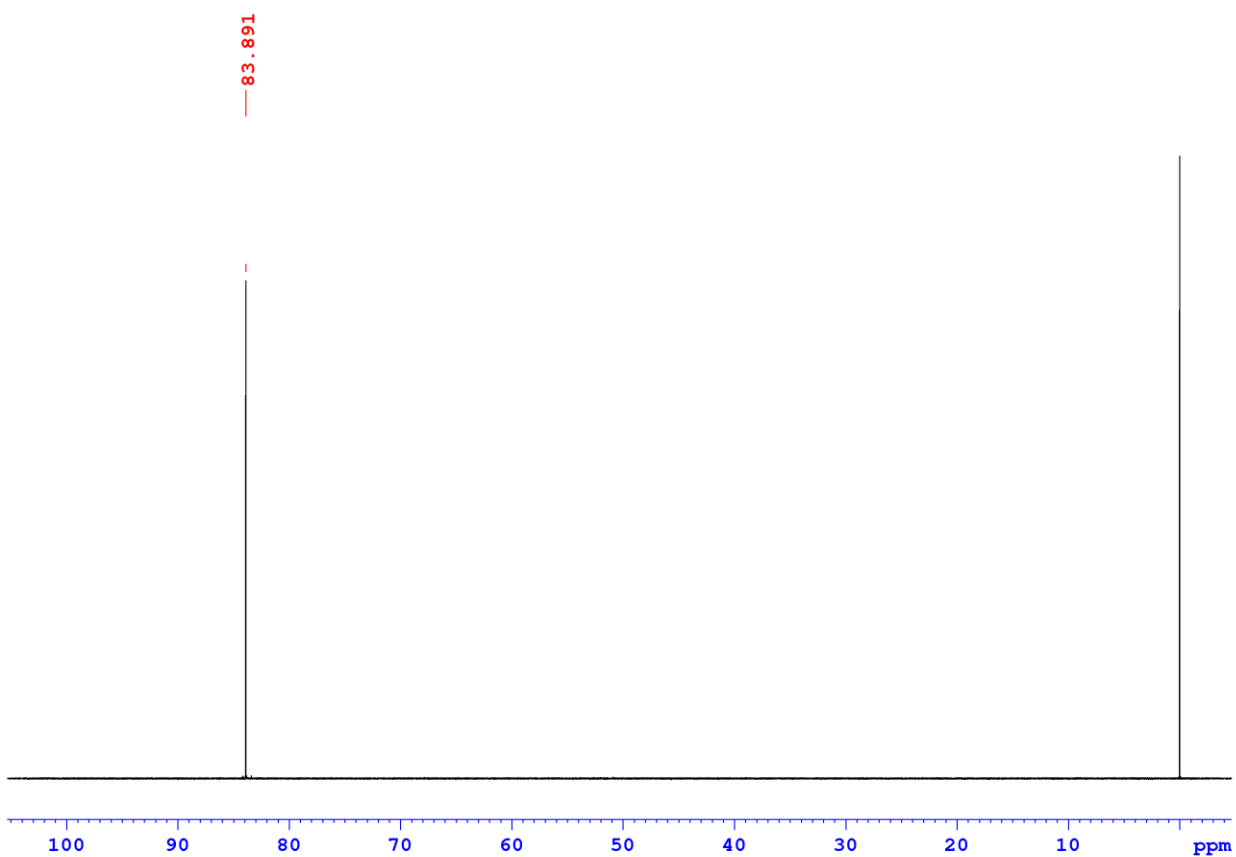

**Figure S8.** <sup>19</sup>F NMR spectrum of **4b<sup>t</sup>**.

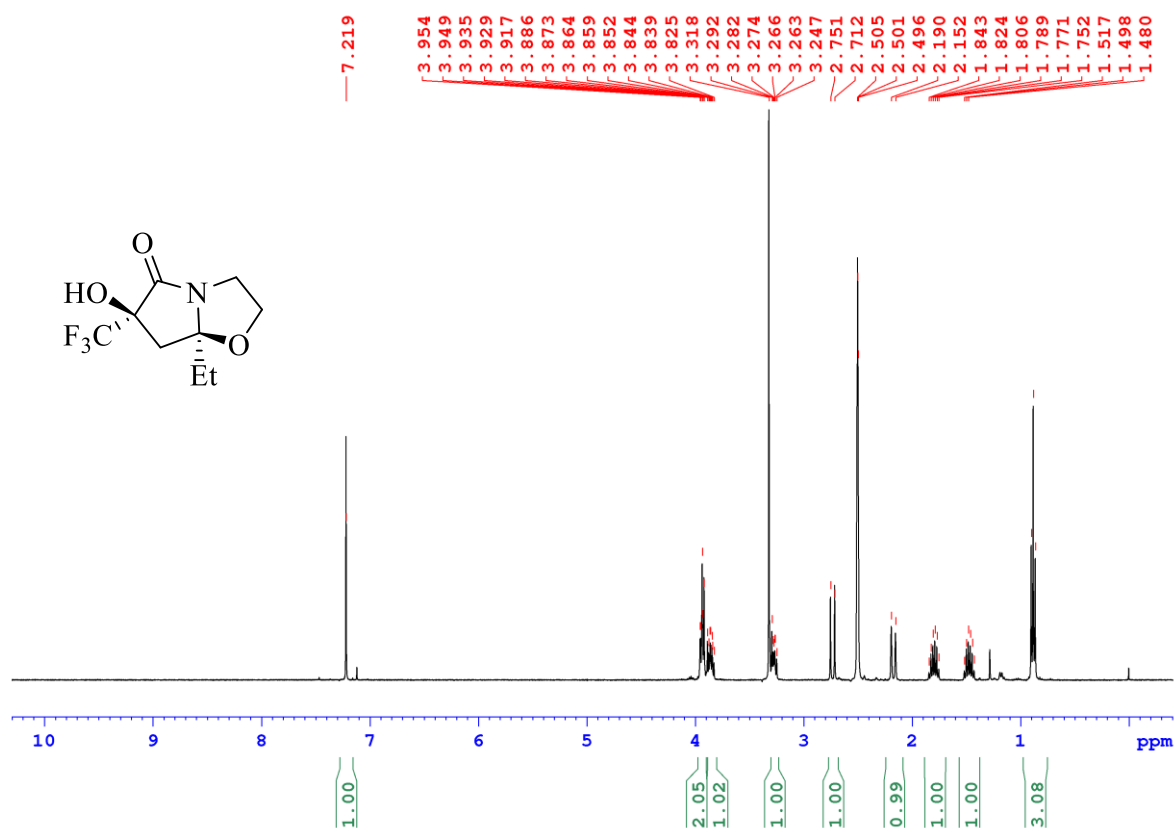

**Figure S9.** <sup>1</sup>H NMR spectrum of **4b<sup>c</sup>** (mixed with **4b<sup>t</sup>** in the ratio 90:10).

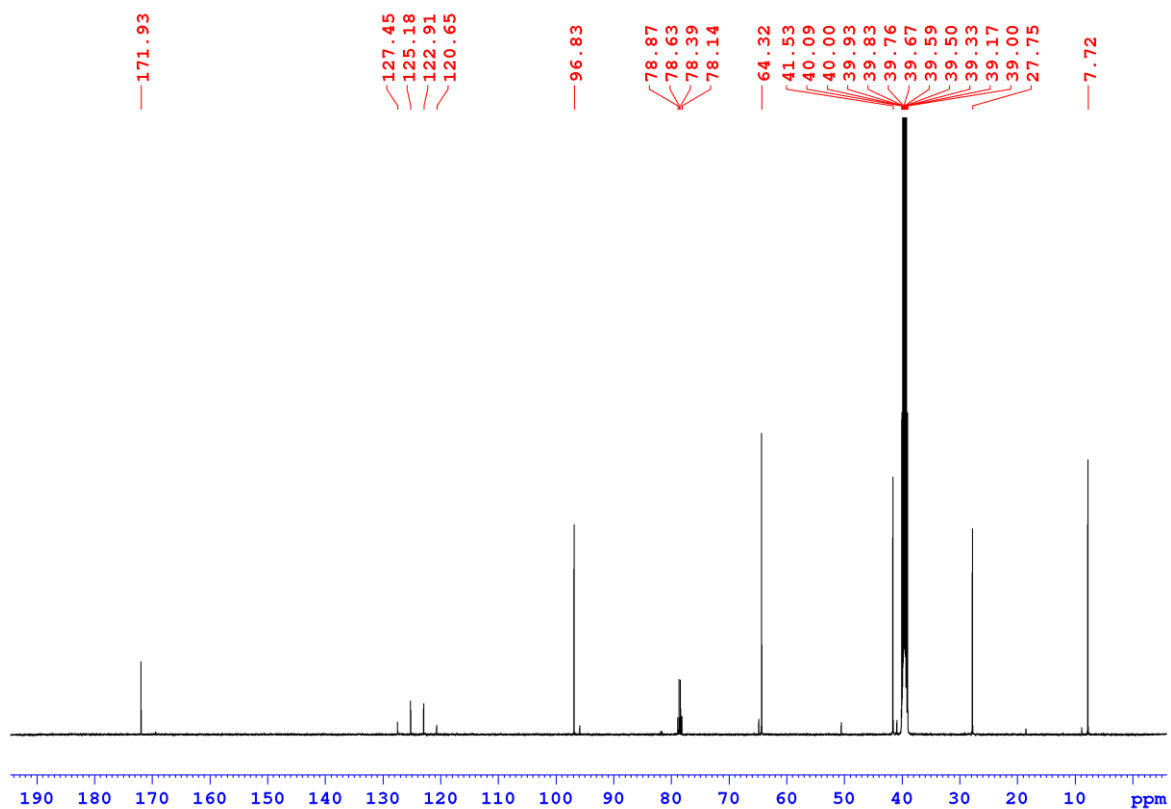

**Figure S10.** <sup>13</sup>C NMR spectrum of **4b<sup>c</sup>** (mixed with **4b<sup>t</sup>** in the ratio 90:10).



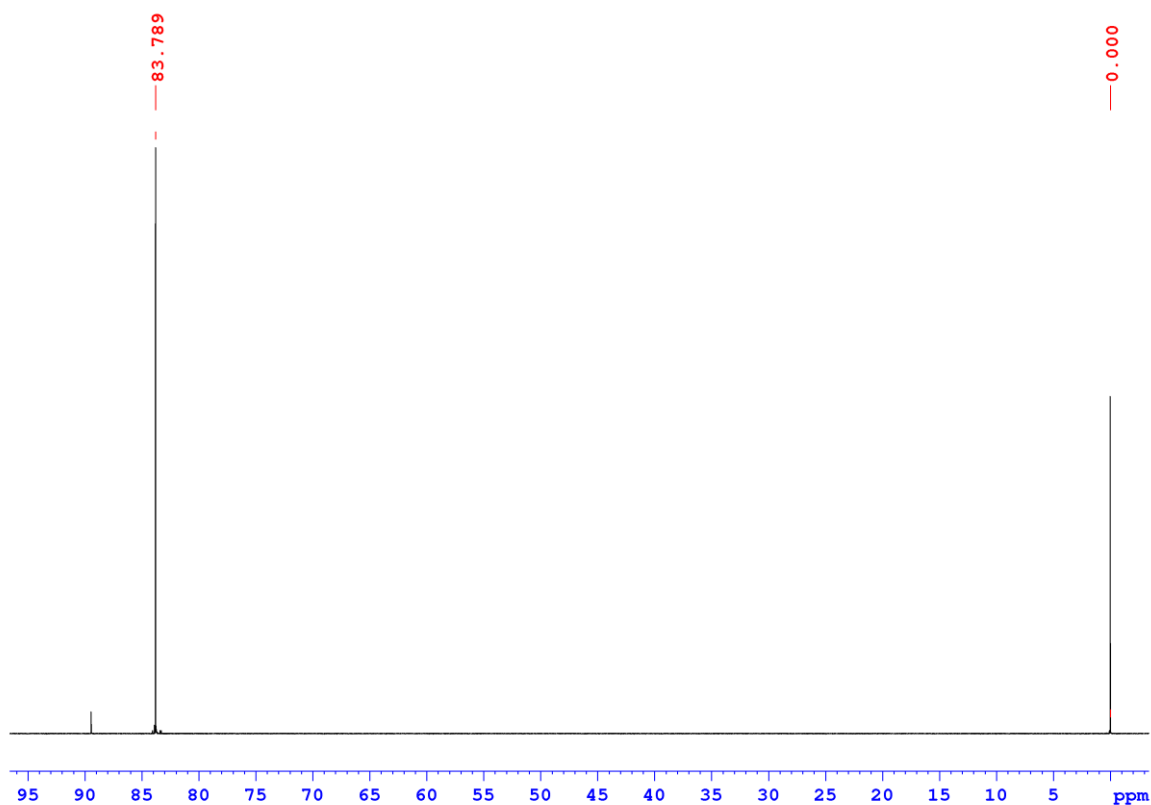

**Figure S11.** <sup>19</sup>F NMR spectrum of **4b<sup>c</sup>** (mixed with **4b<sup>t</sup>** in the ratio 90:10).

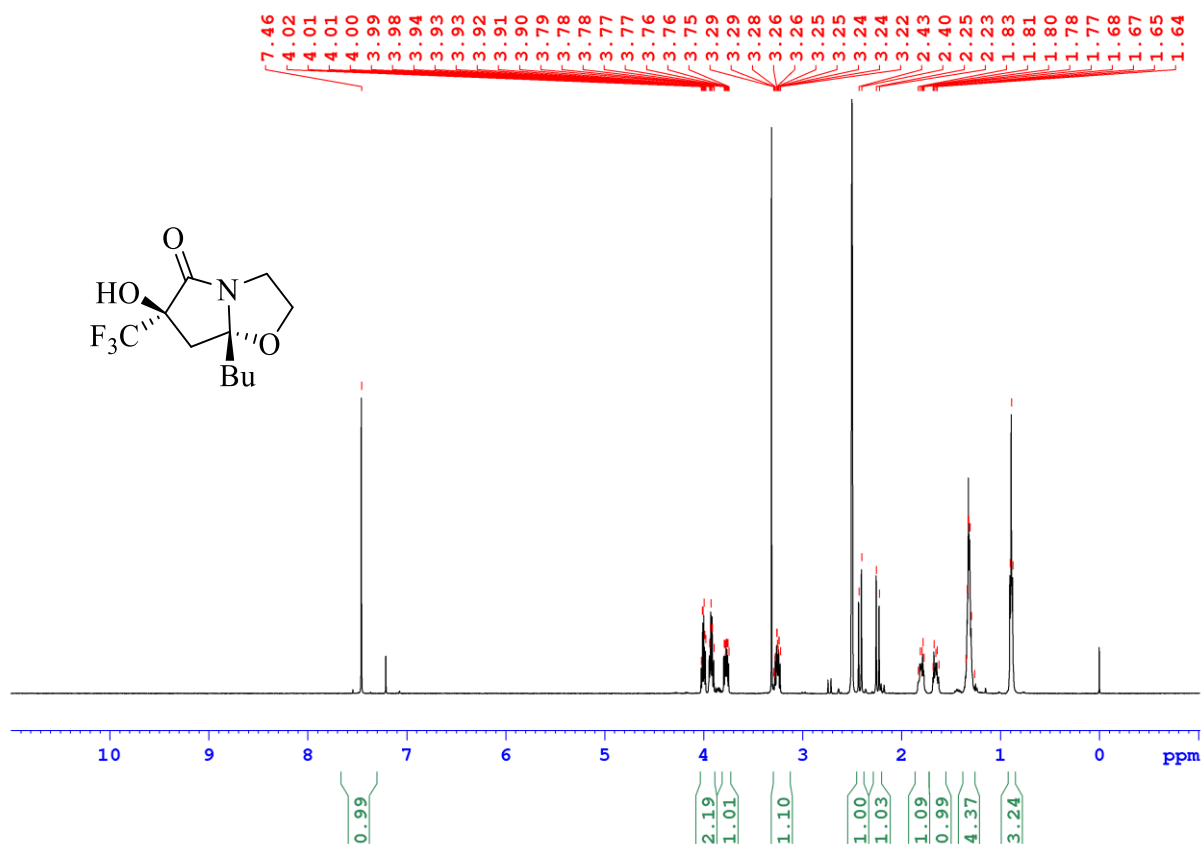

**Figure S12.** <sup>1</sup>H NMR spectrum of **4c<sup>t</sup>** (mixed with **4c<sup>c</sup>** in the ratio 90:10).

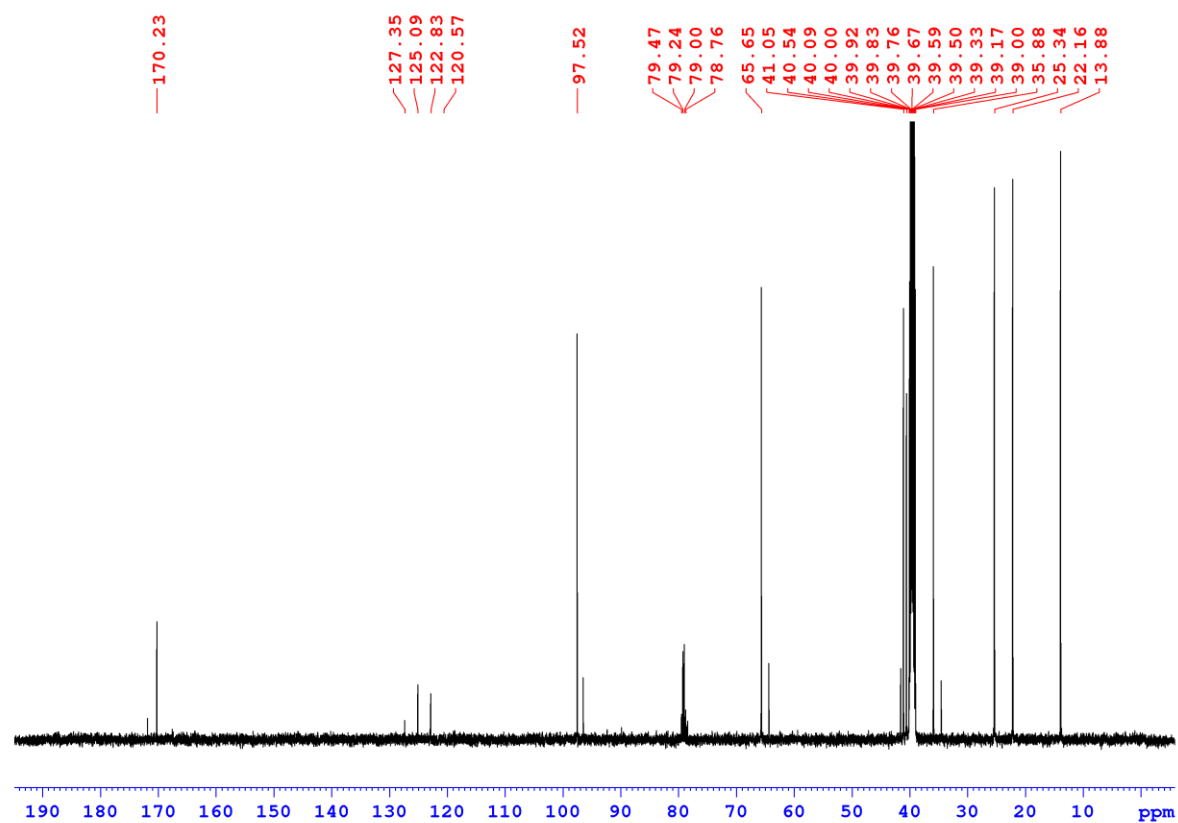

**Figure S13.** <sup>13</sup>C NMR spectrum of **4c<sup>t</sup>** (mixed with **4c<sup>c</sup>** in the ratio 90:10).

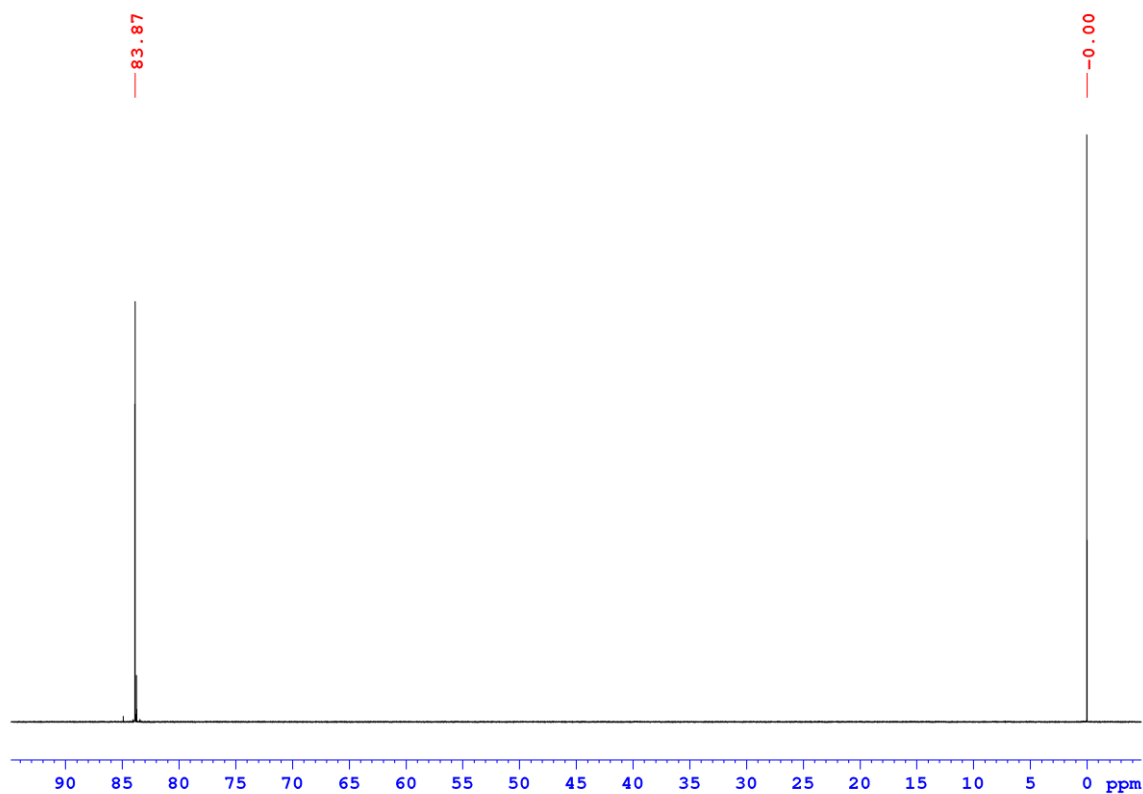

**Figure S14.** <sup>19</sup>F NMR spectrum of **4c<sup>t</sup>** (mixed with **4c<sup>c</sup>** in the ratio 90:10).

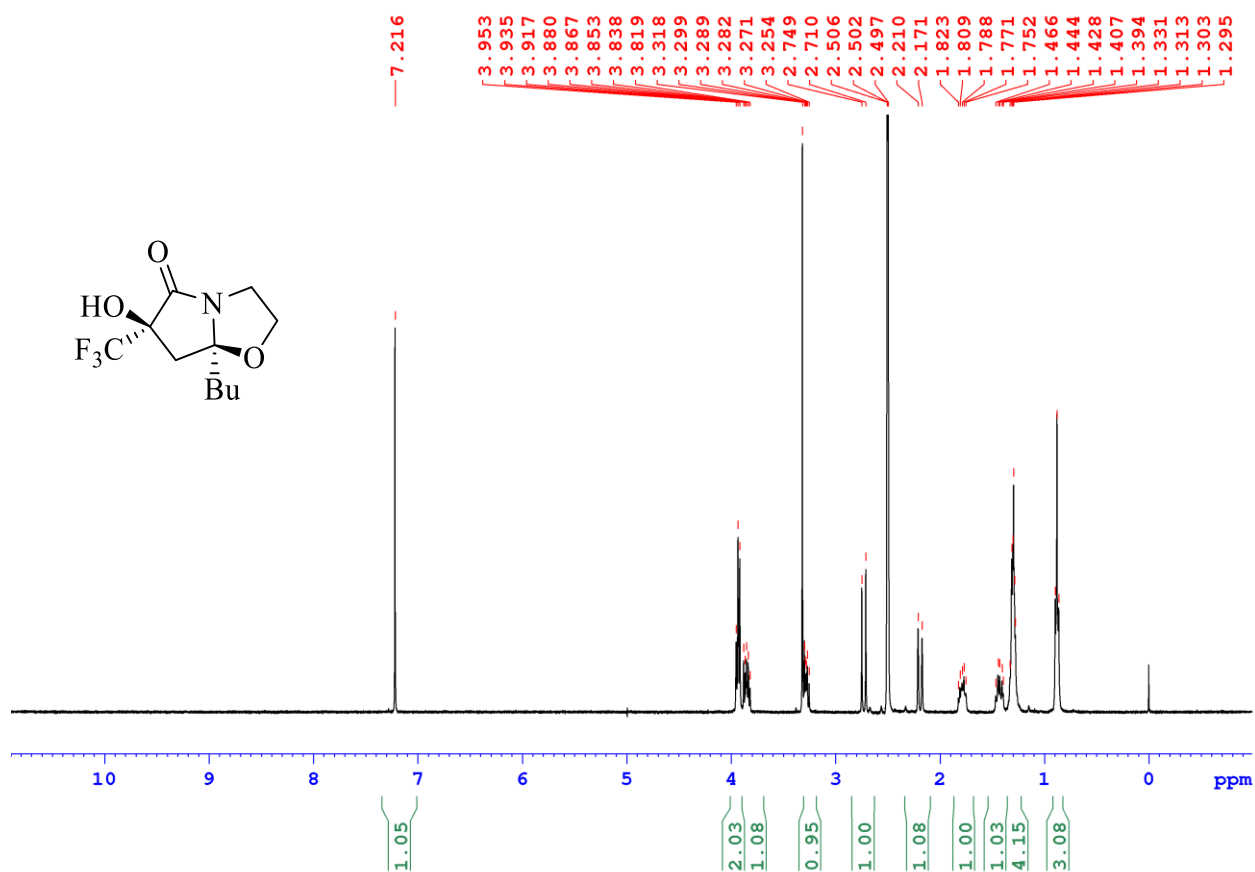

**Figure S15.** <sup>1</sup>H NMR spectrum of **4c**.

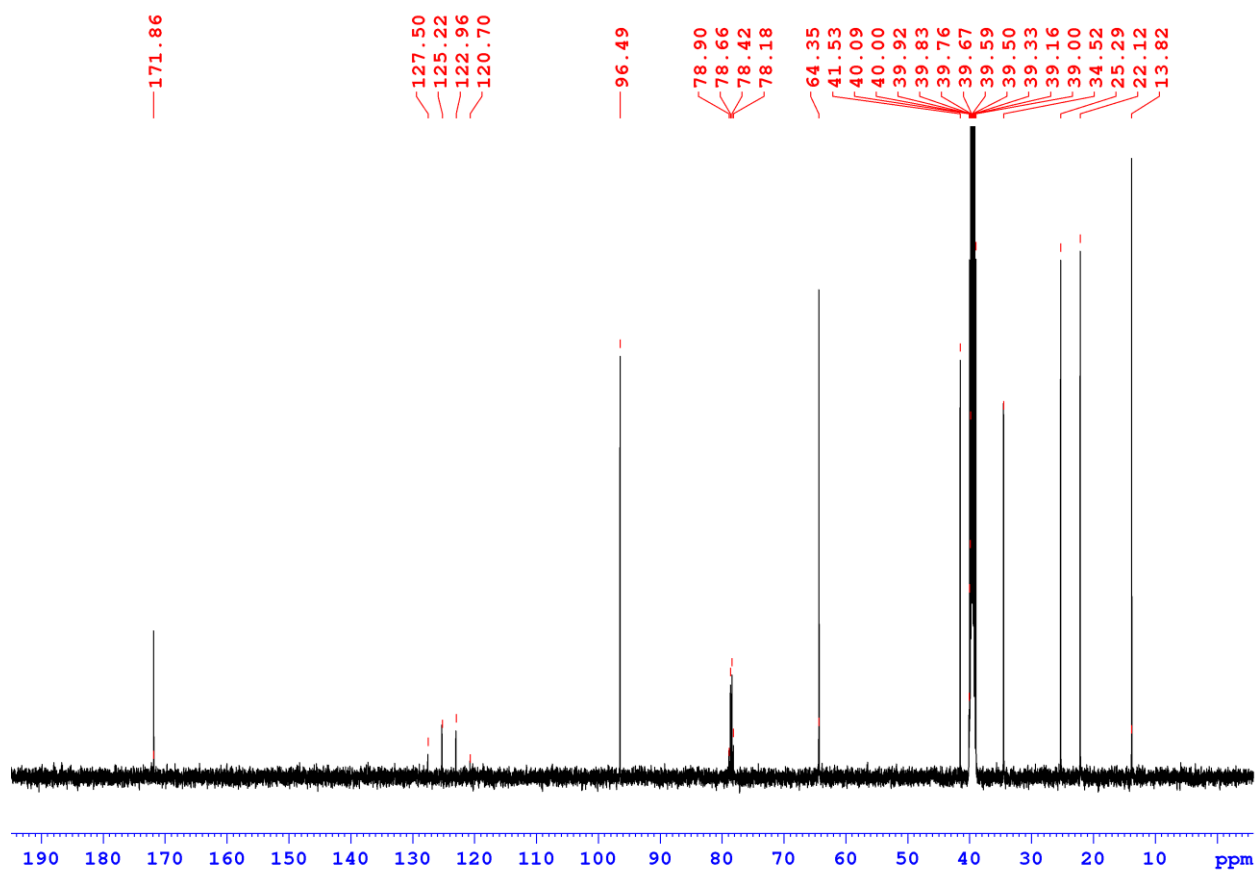

**Figure S16.** <sup>13</sup>C NMR spectrum of **4c**.

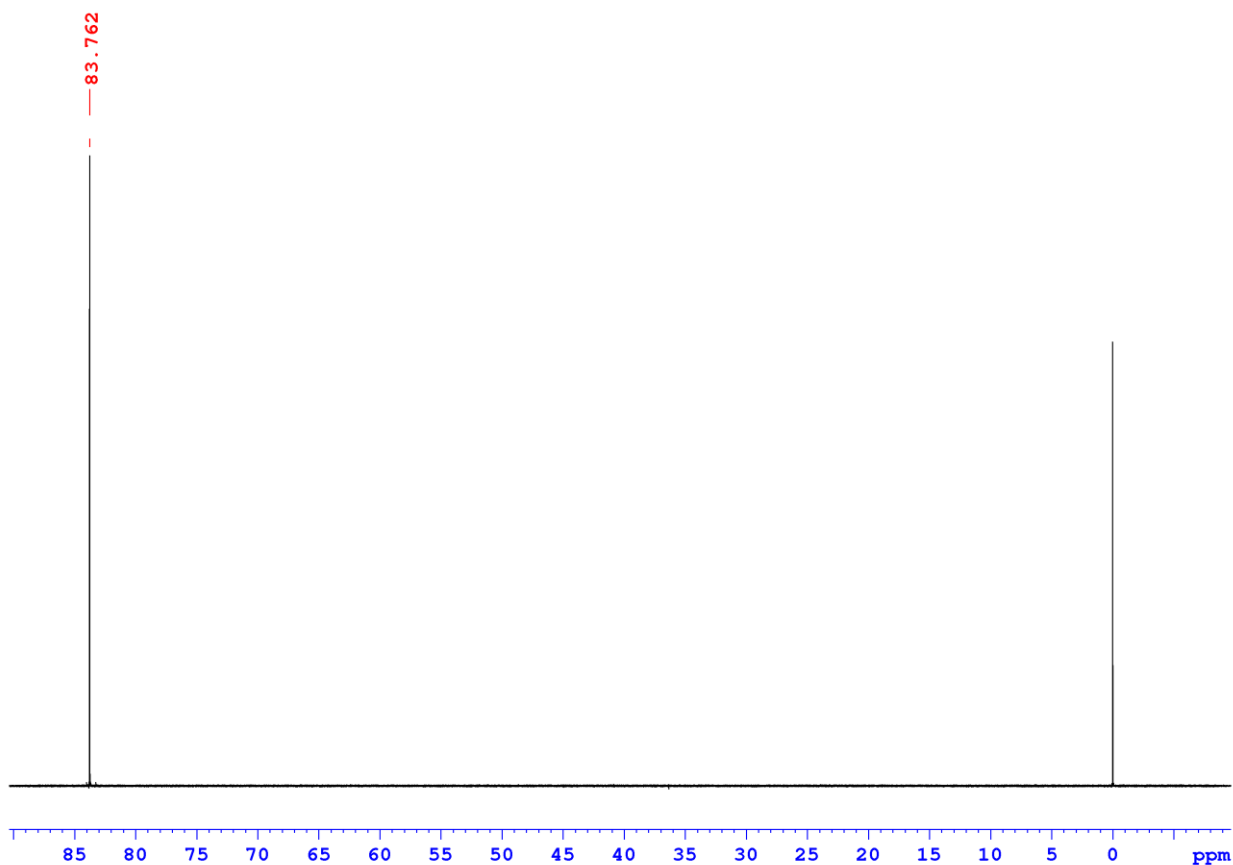

**Figure S17.** <sup>19</sup>F NMR spectrum of **4c**.

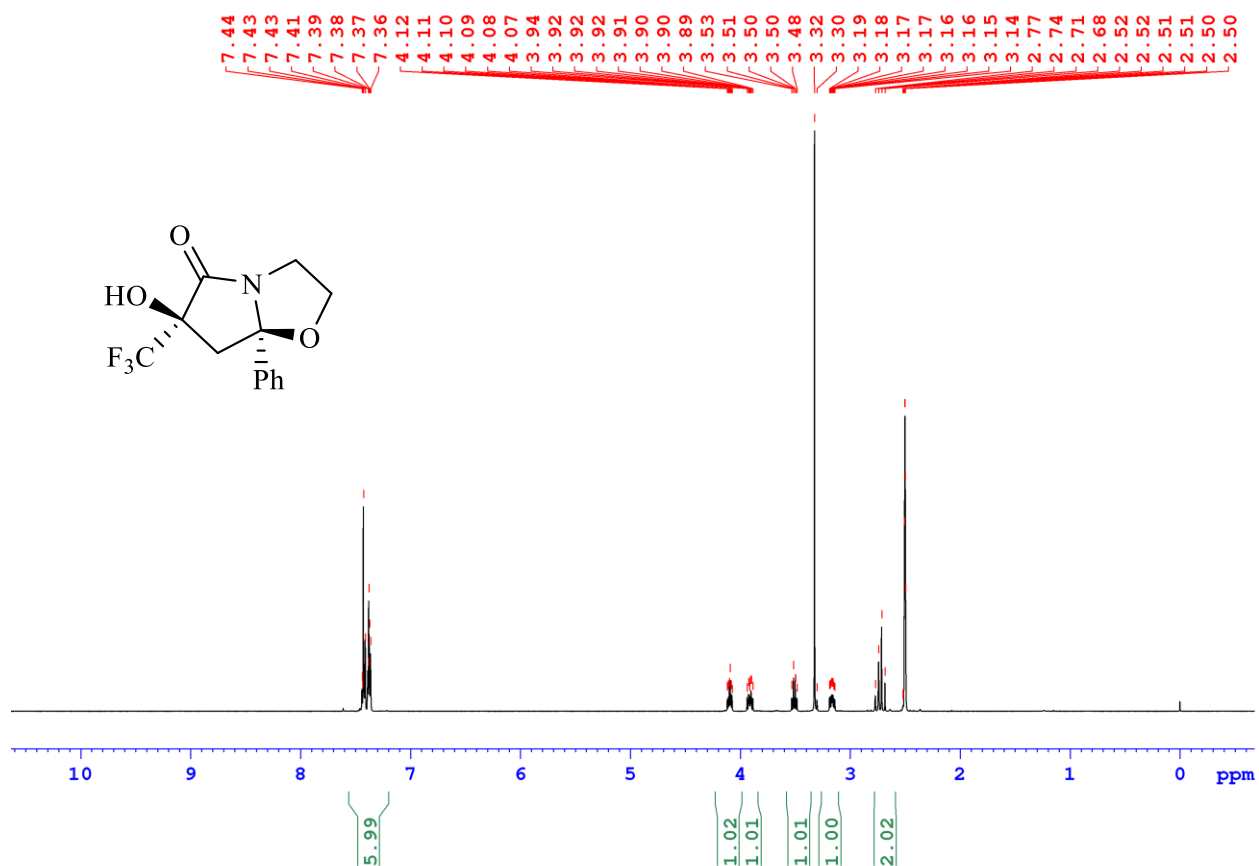

**Figure S18.** <sup>1</sup>H NMR spectrum of **4d**.

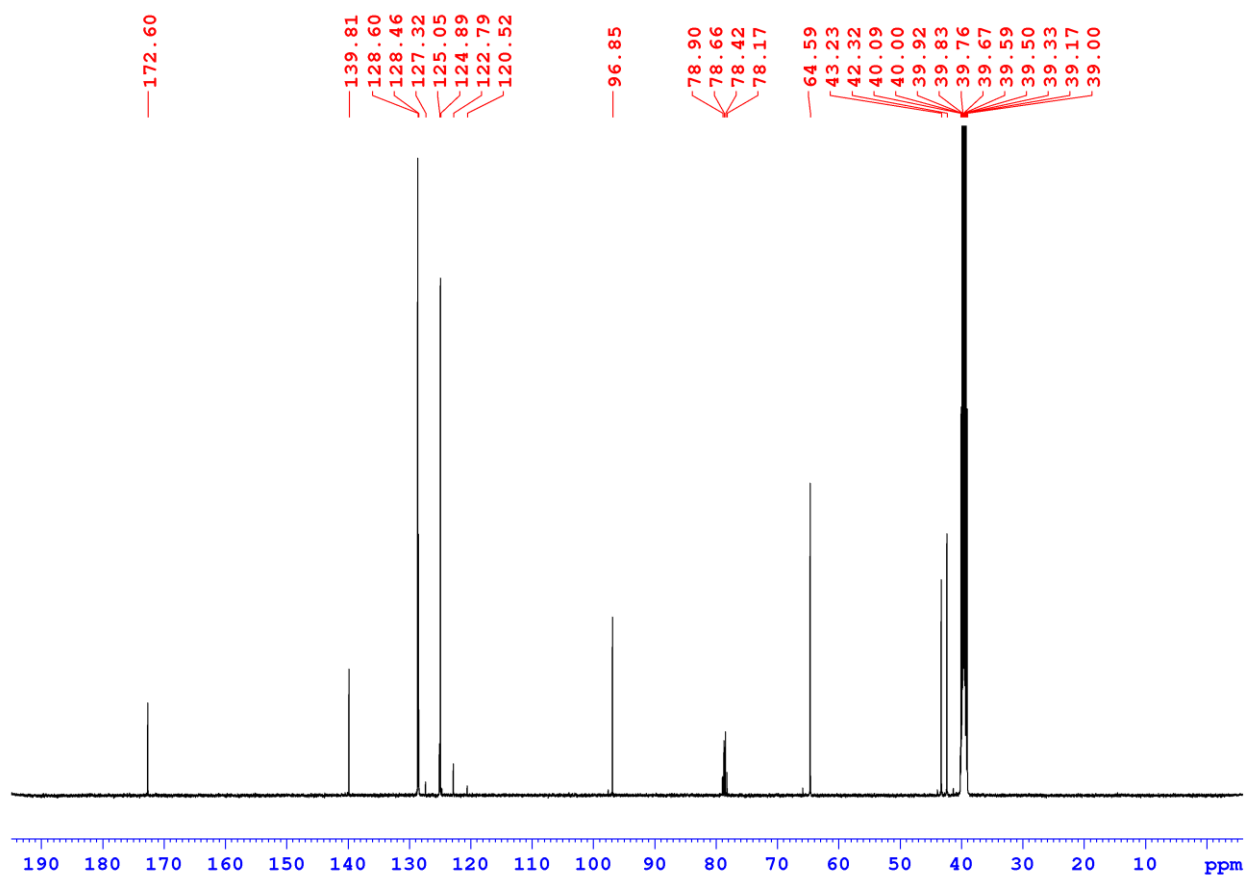

**Figure S19.** <sup>13</sup>C NMR spectrum of **4d<sup>c</sup>**.

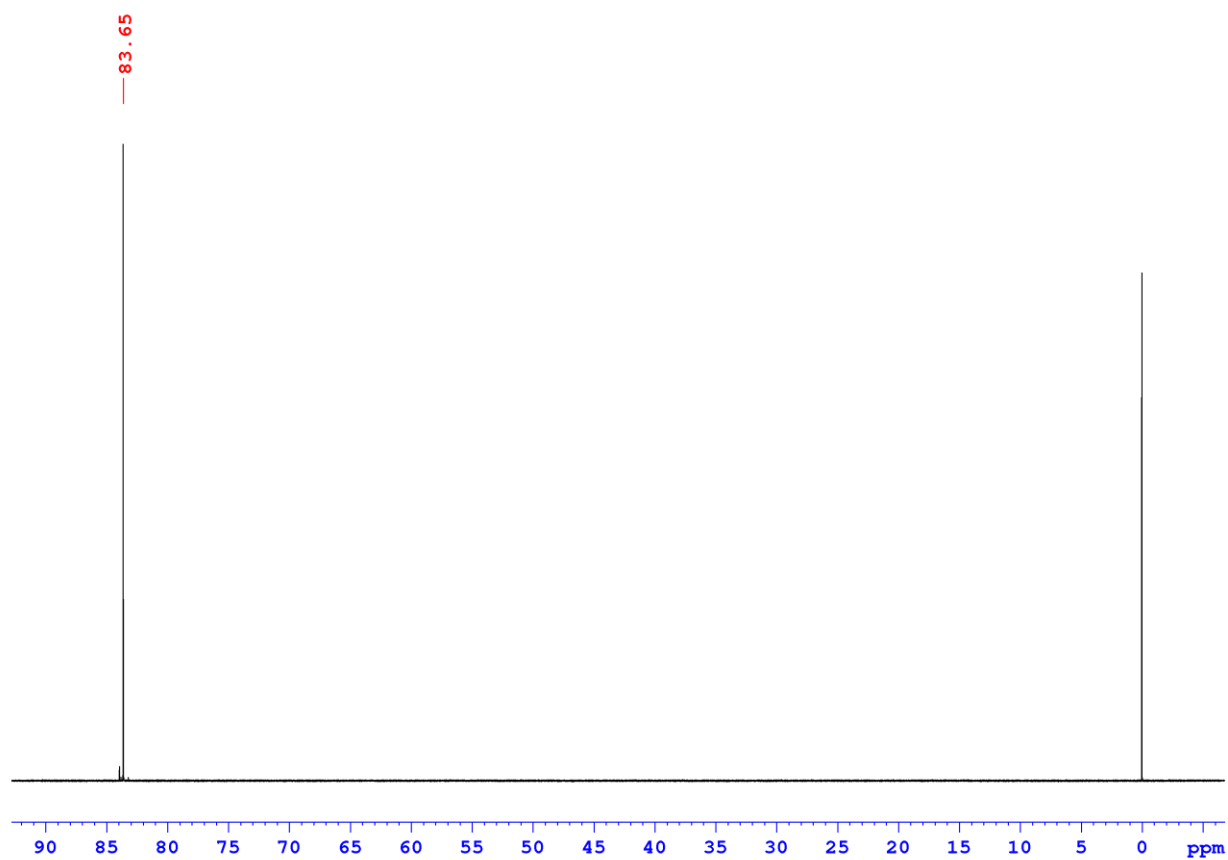

**Figure S20.** <sup>19</sup>F NMR spectrum of **4d<sup>c</sup>**.



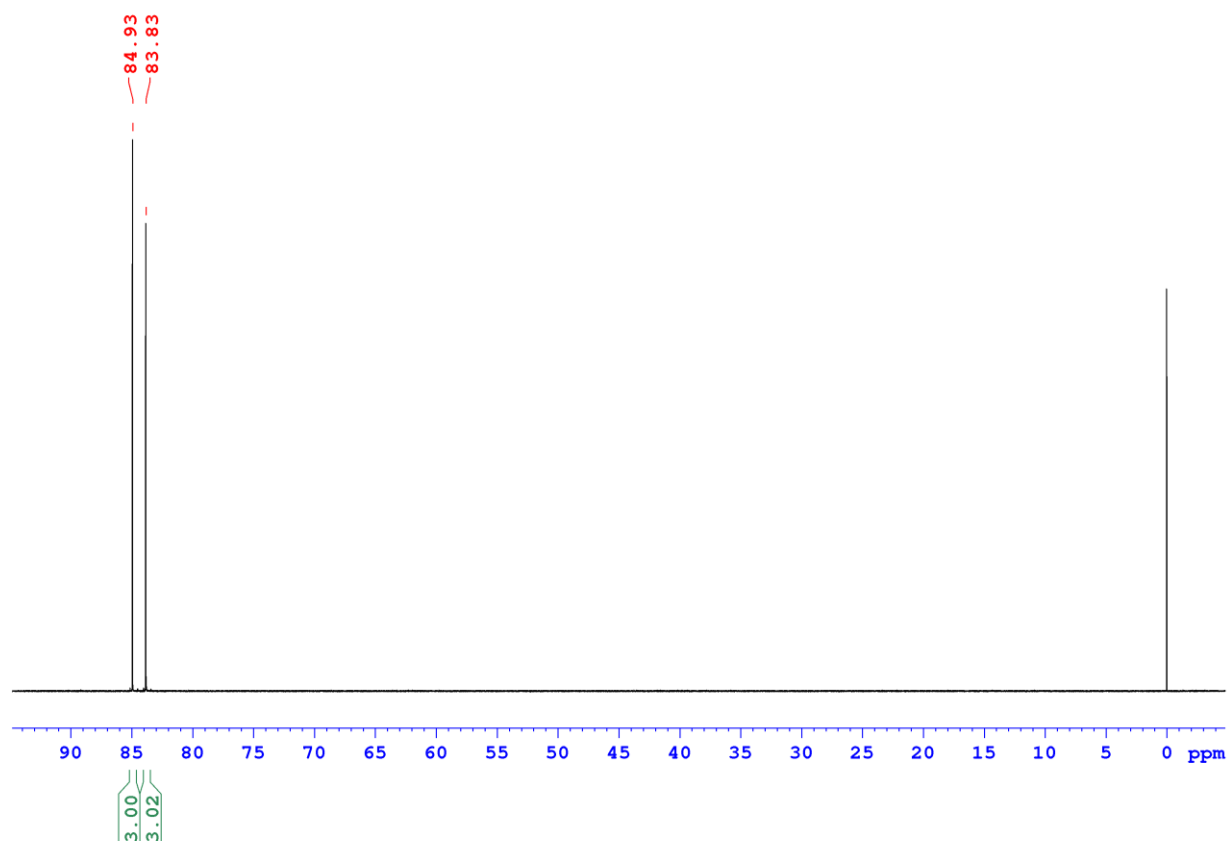

**Figure S23.** <sup>19</sup>F NMR spectrum of **5<sup>tc</sup>**.

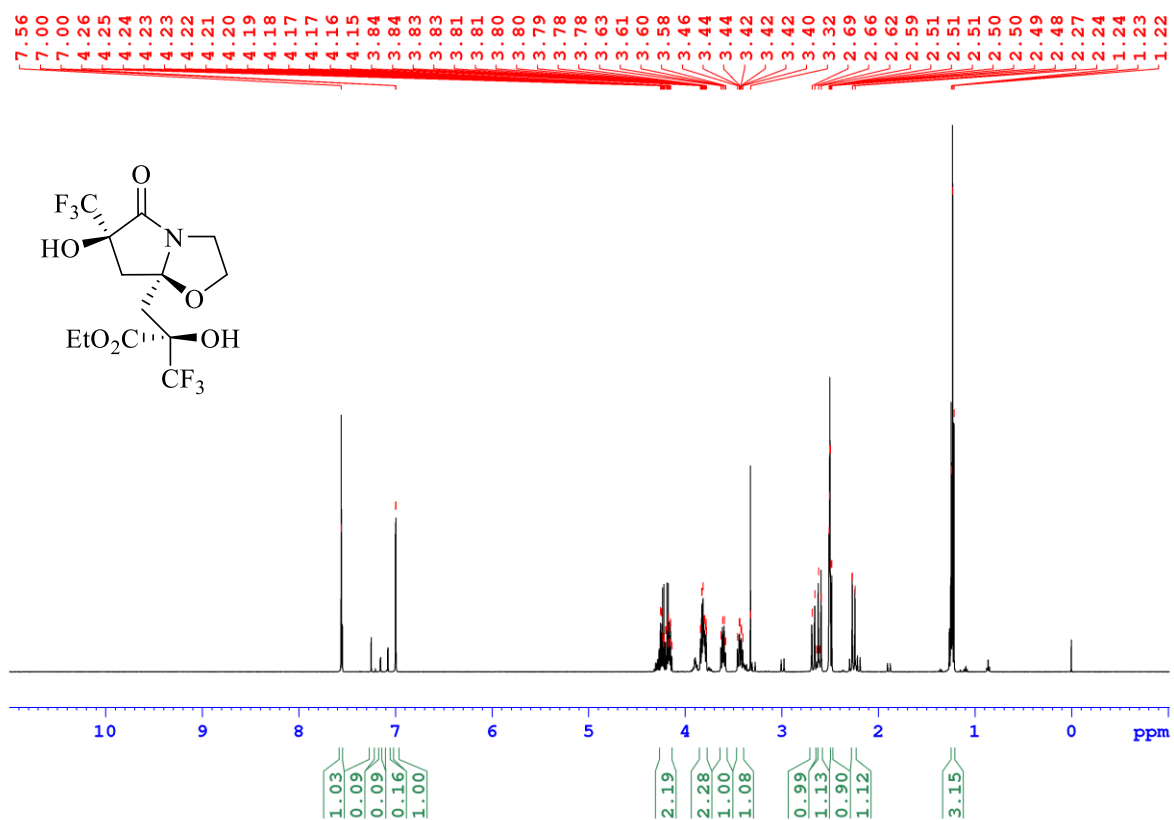

**Figure S24.** <sup>1</sup>H NMR spectrum of **5<sup>cc</sup>** (mixed with **5<sup>tc</sup>** in the ratio 80:20 )

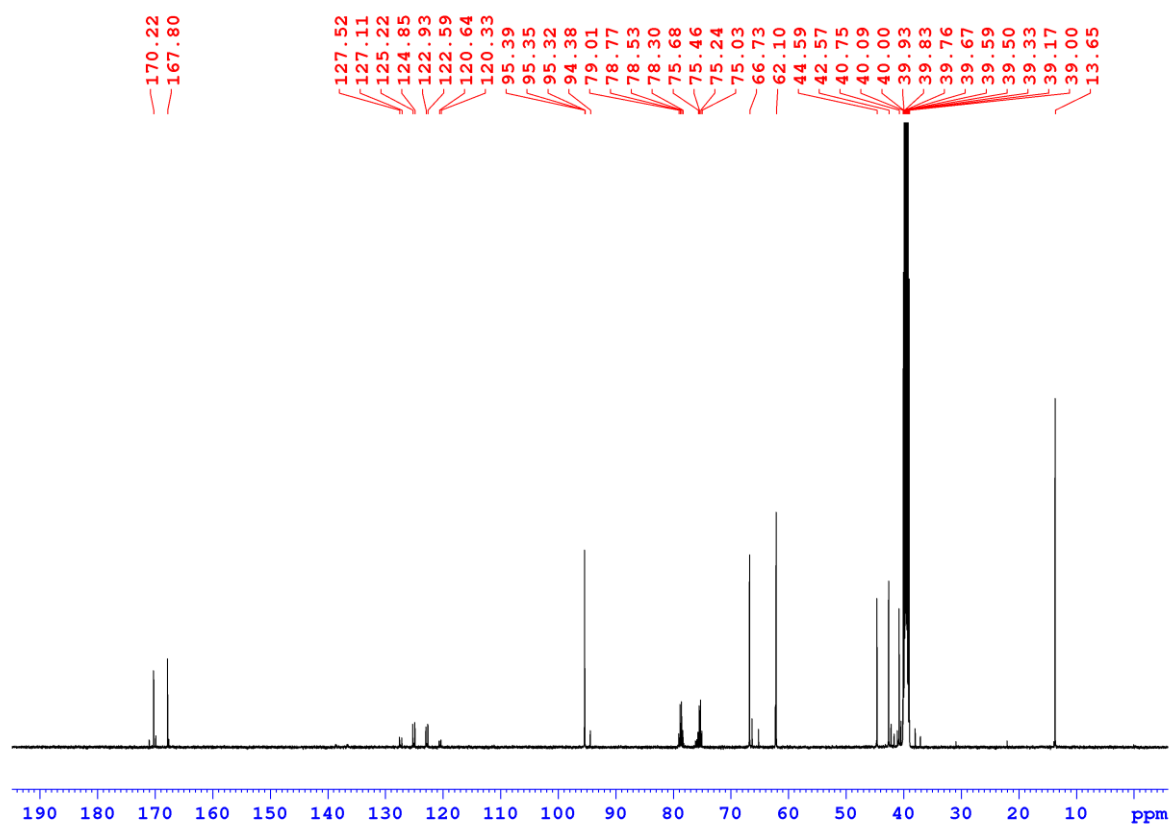

**Figure S25.** <sup>13</sup>C NMR spectrum of **5<sup>cc</sup>** ( mixed with **5<sup>tc</sup>** in the ratio 80:20 ).

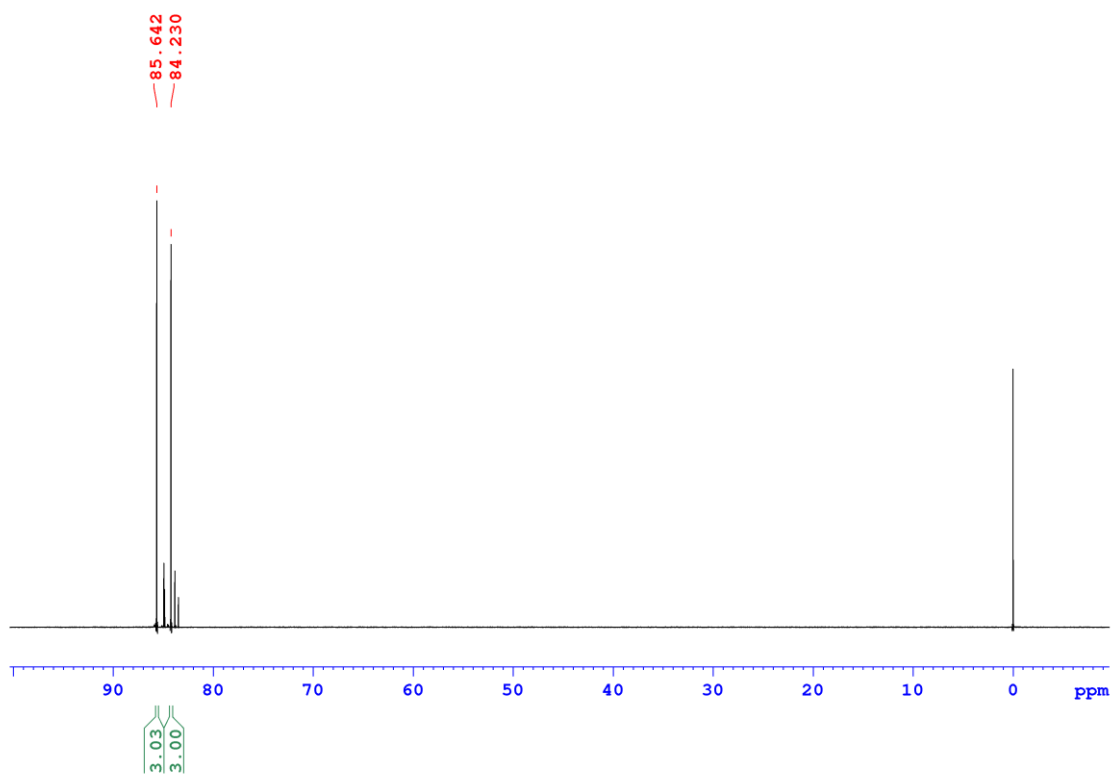

**Figure S26.** <sup>19</sup>F NMR spectrum of **5<sup>cc</sup>** ( mixed with **5<sup>tc</sup>** in the ratio 80:20).



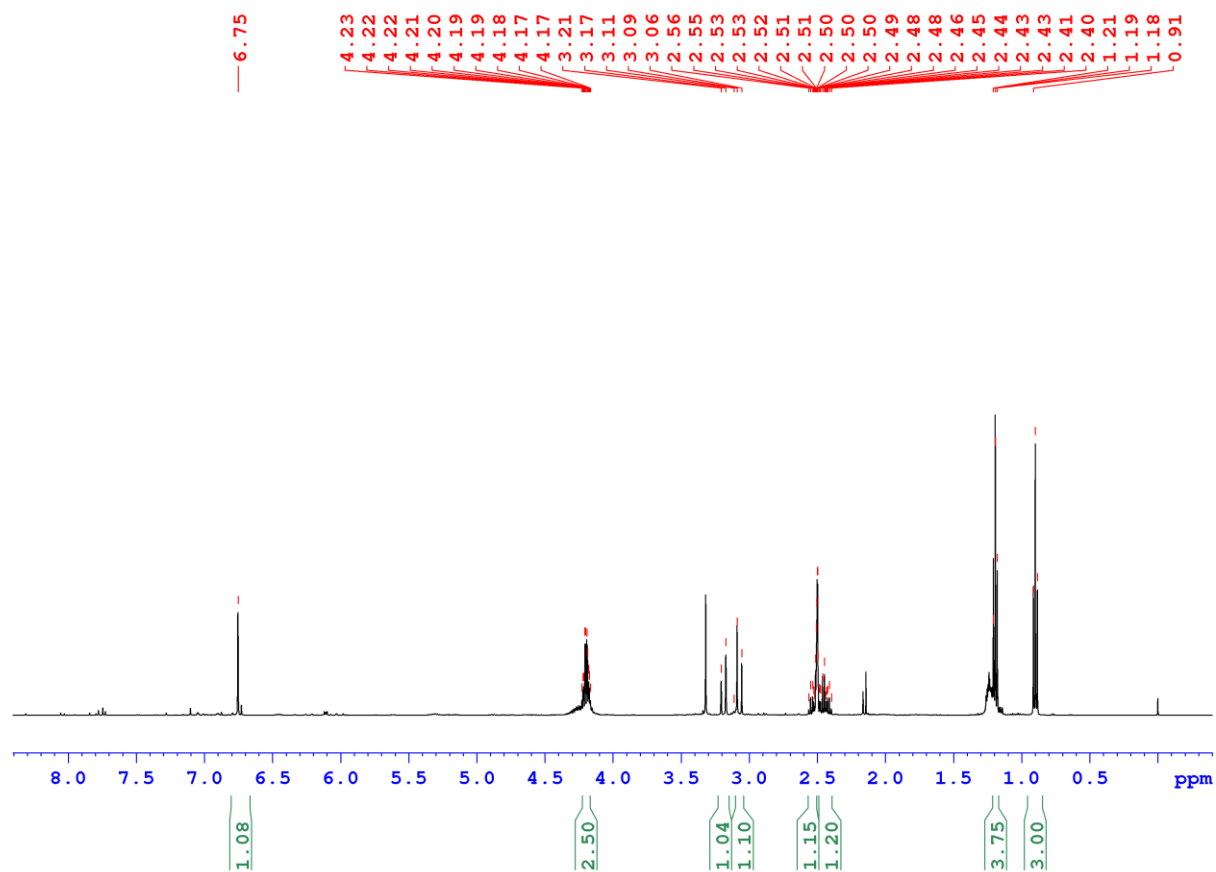

**Figure S27.** <sup>1</sup>H NMR spectrum of **6b**.

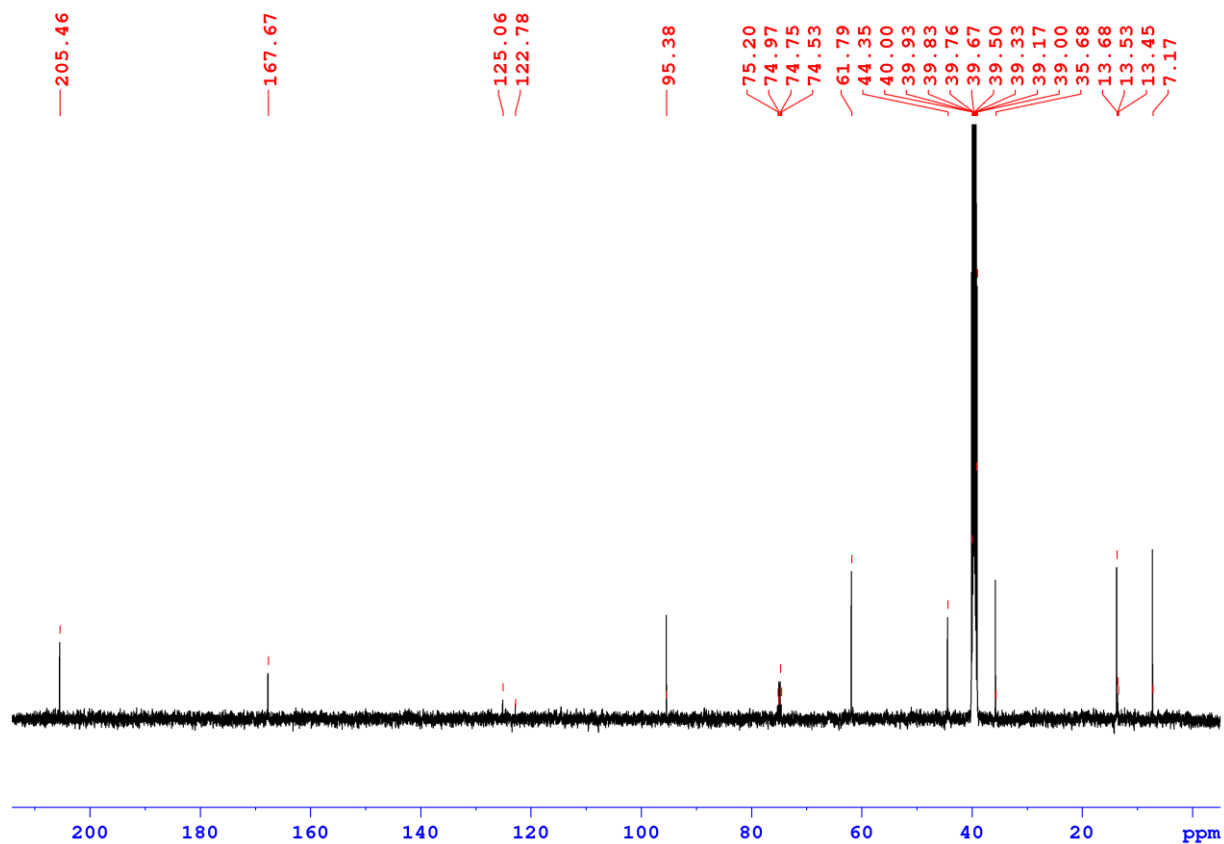

**Figure S28.** <sup>13</sup>C NMR spectrum of **6b**.

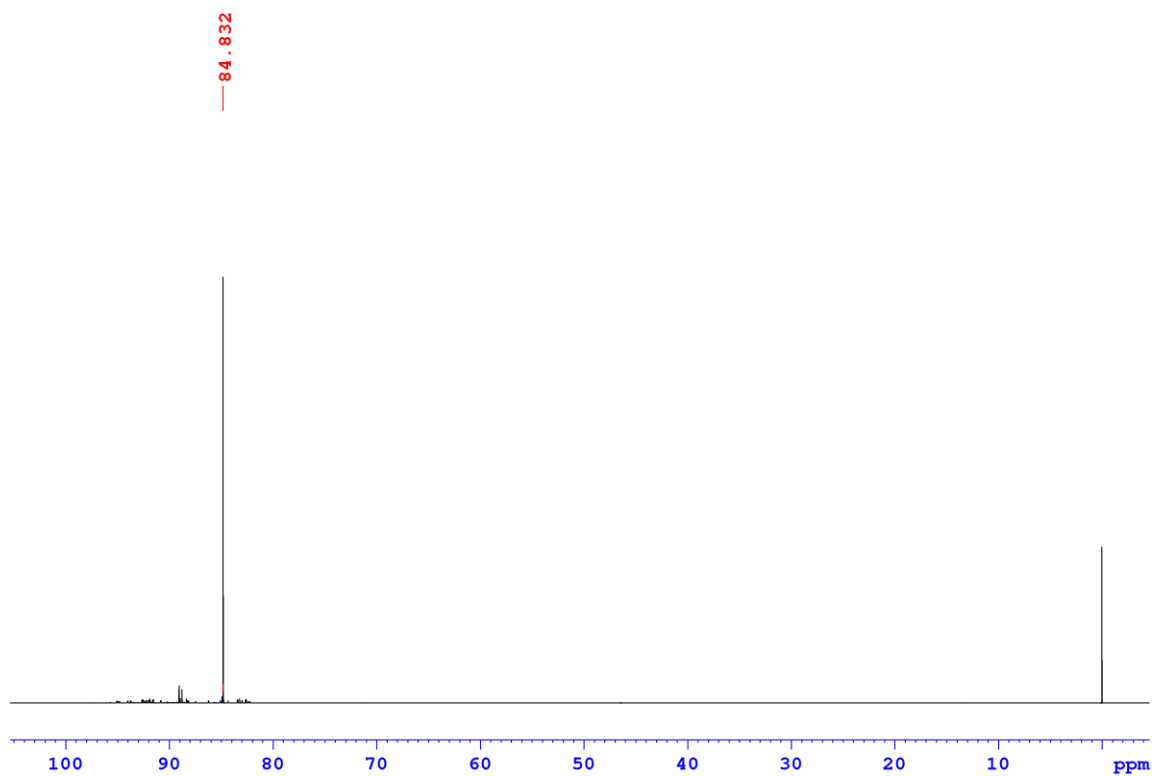

**Figure S29.**  $^{19}\text{F}$  NMR spectrum of **6b**.

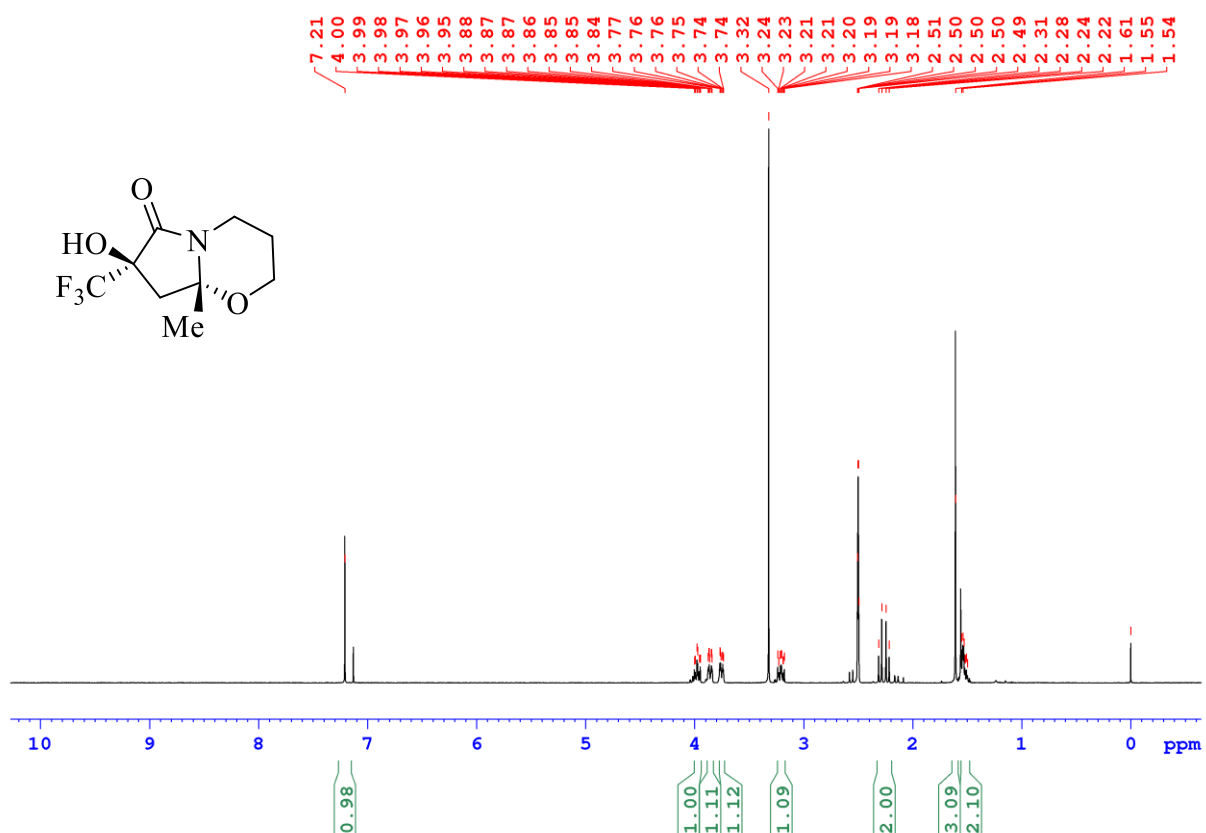

**Figure S30.**  $^1\text{H}$  NMR spectrum of **8a<sup>t</sup>** (mixed with **8a<sup>c</sup>** in the ratio 84:16 ).

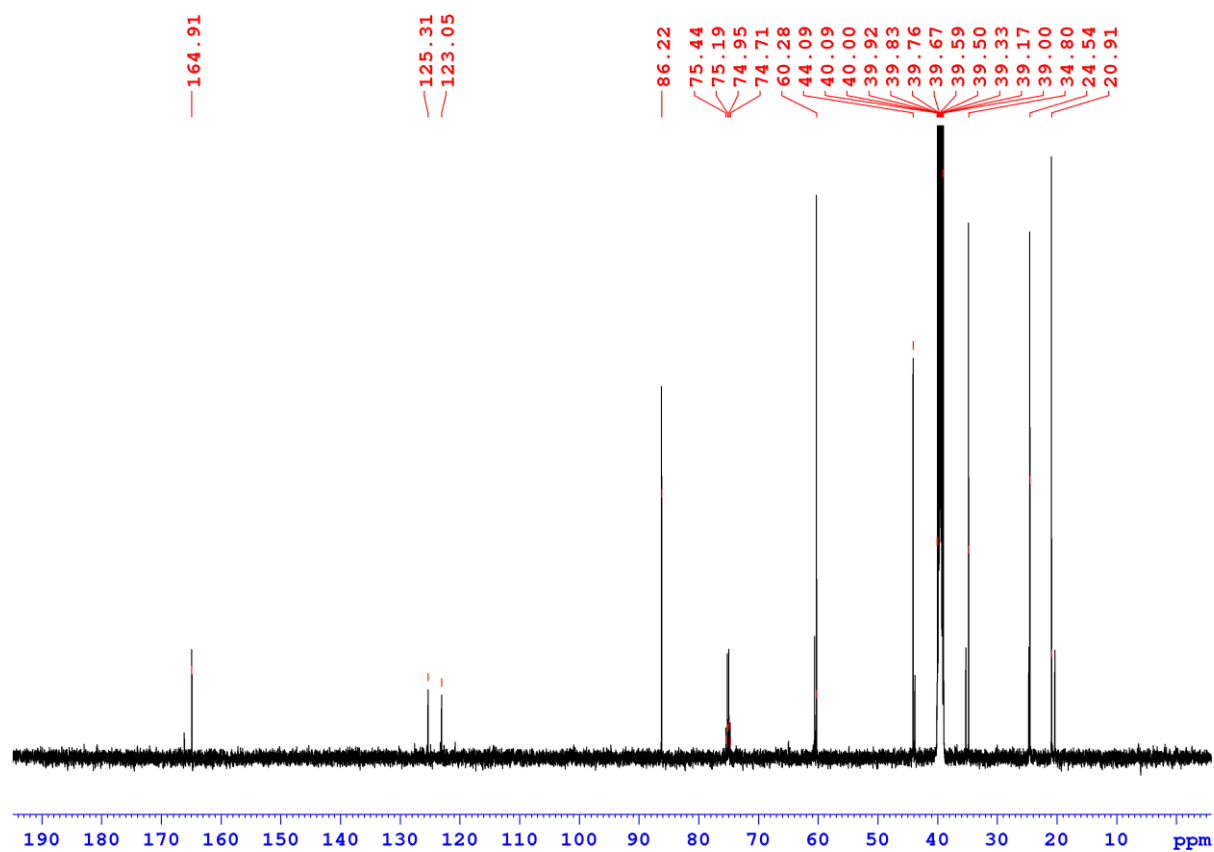

**Figure S31.** <sup>13</sup>C NMR spectrum of **8a<sup>t</sup>** (mixed with **8a<sup>c</sup>** in the ratio 84:16).

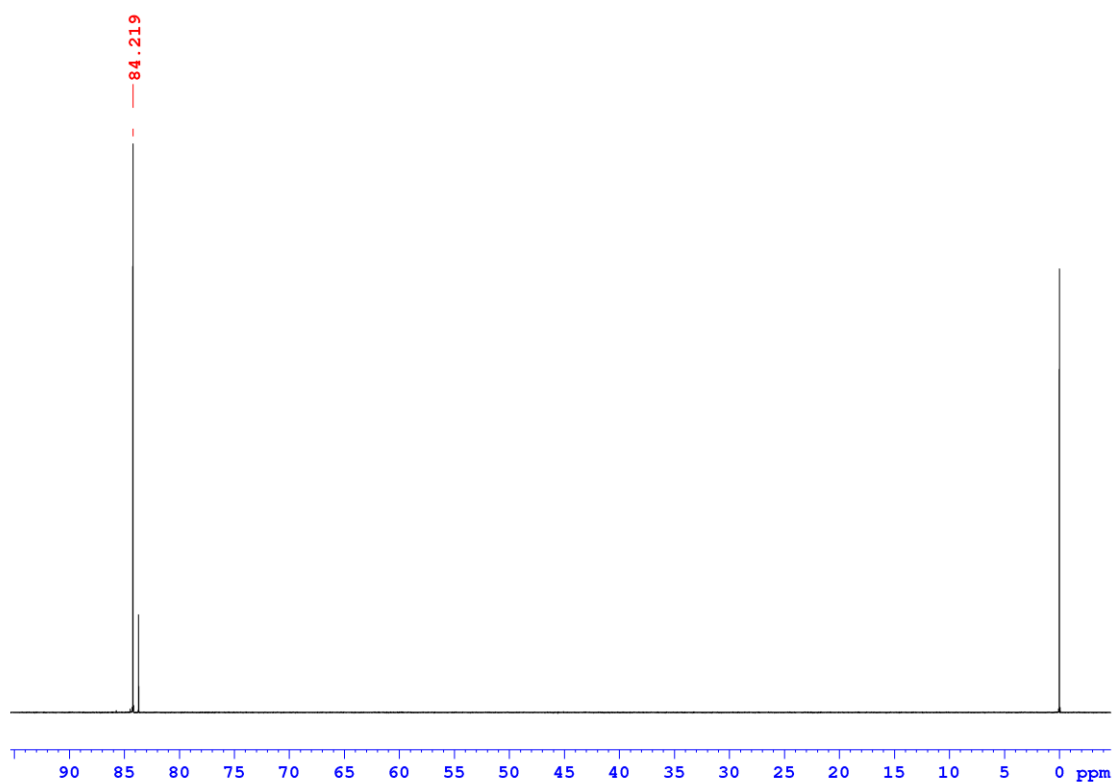

**Figure S32.** <sup>19</sup>F NMR spectrum of **8a<sup>t</sup>** (mixed with **8a<sup>c</sup>** in the ratio 84:16).

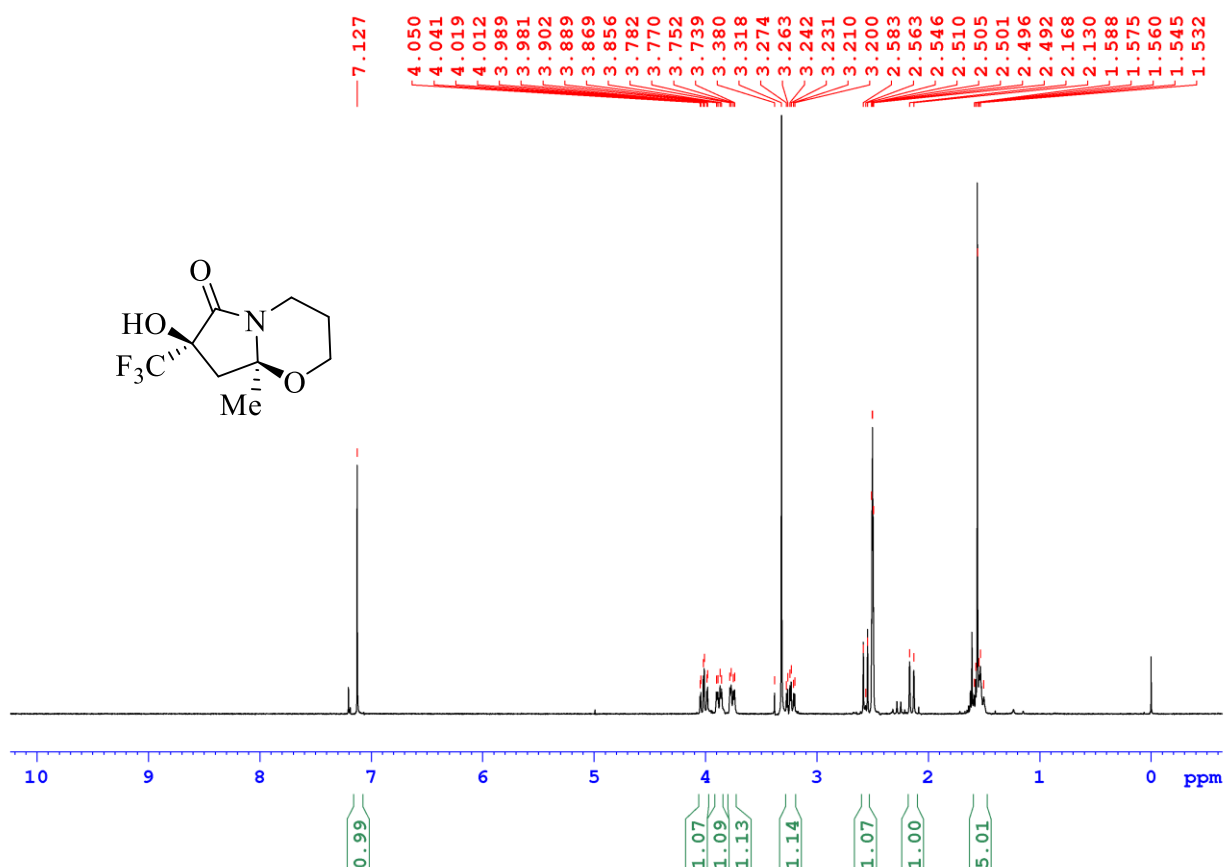

**Figure S33.** <sup>1</sup>H NMR spectrum of **8a<sup>c</sup>** (mixed with **8a<sup>t</sup>** in the ratio 89:11).

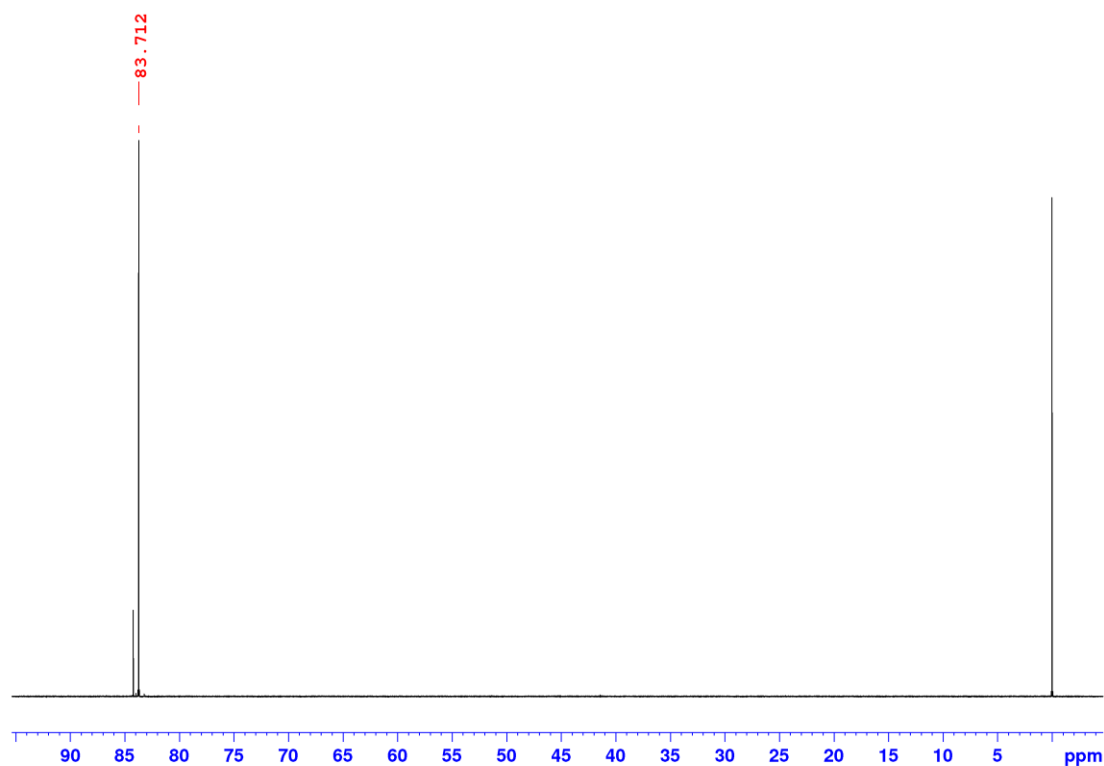

**Figure S34.** <sup>19</sup>F NMR spectrum of **8a<sup>c</sup>** (mixed with **8a<sup>t</sup>** in the ratio 89:11).

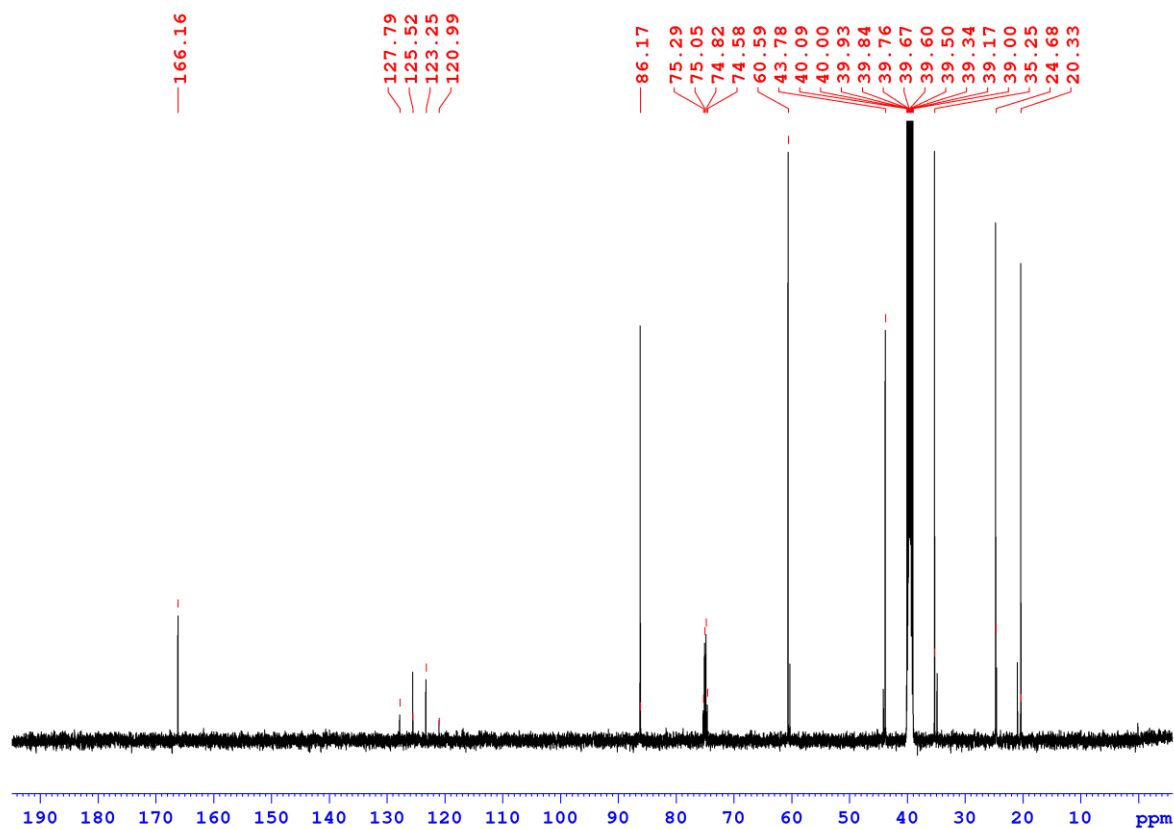

**Figure S35.** <sup>13</sup>C NMR spectrum of **8a<sup>c</sup>** (mixed with **8a<sup>t</sup>** in the ratio 89:11).

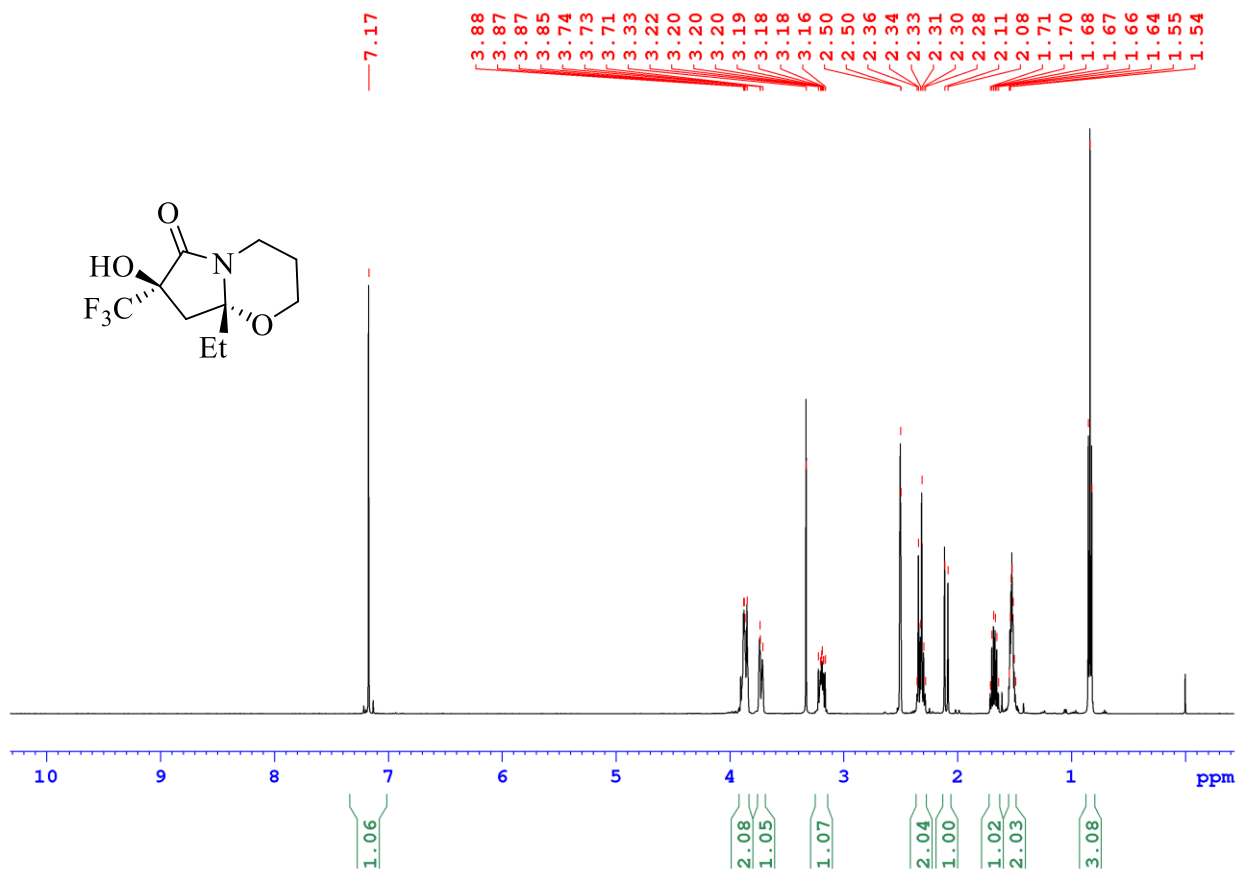

**Figure S36.** <sup>1</sup>H NMR spectrum of **8b<sup>t</sup>**.

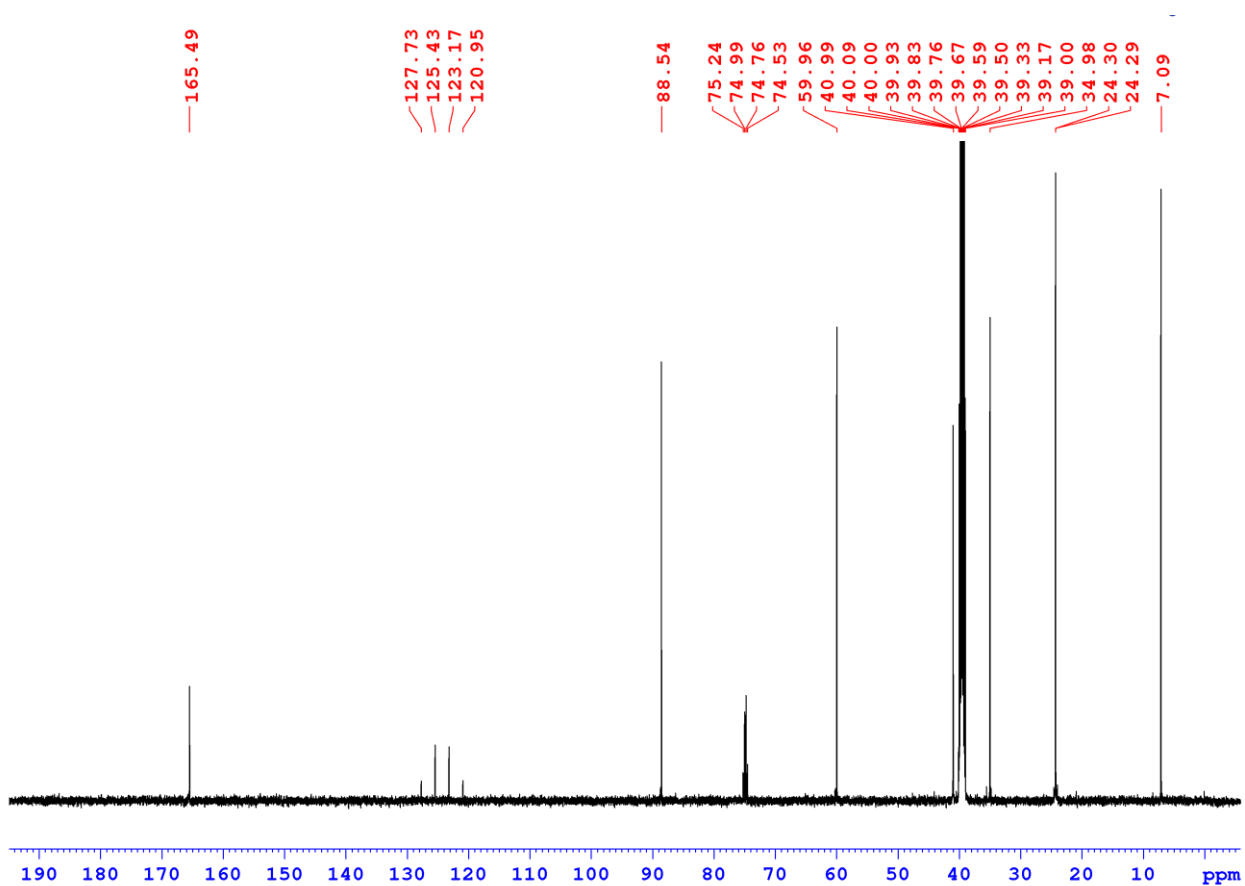

**Figure S37.**  $^{13}\text{C}$  NMR spectrum of **8b<sup>t</sup>**.

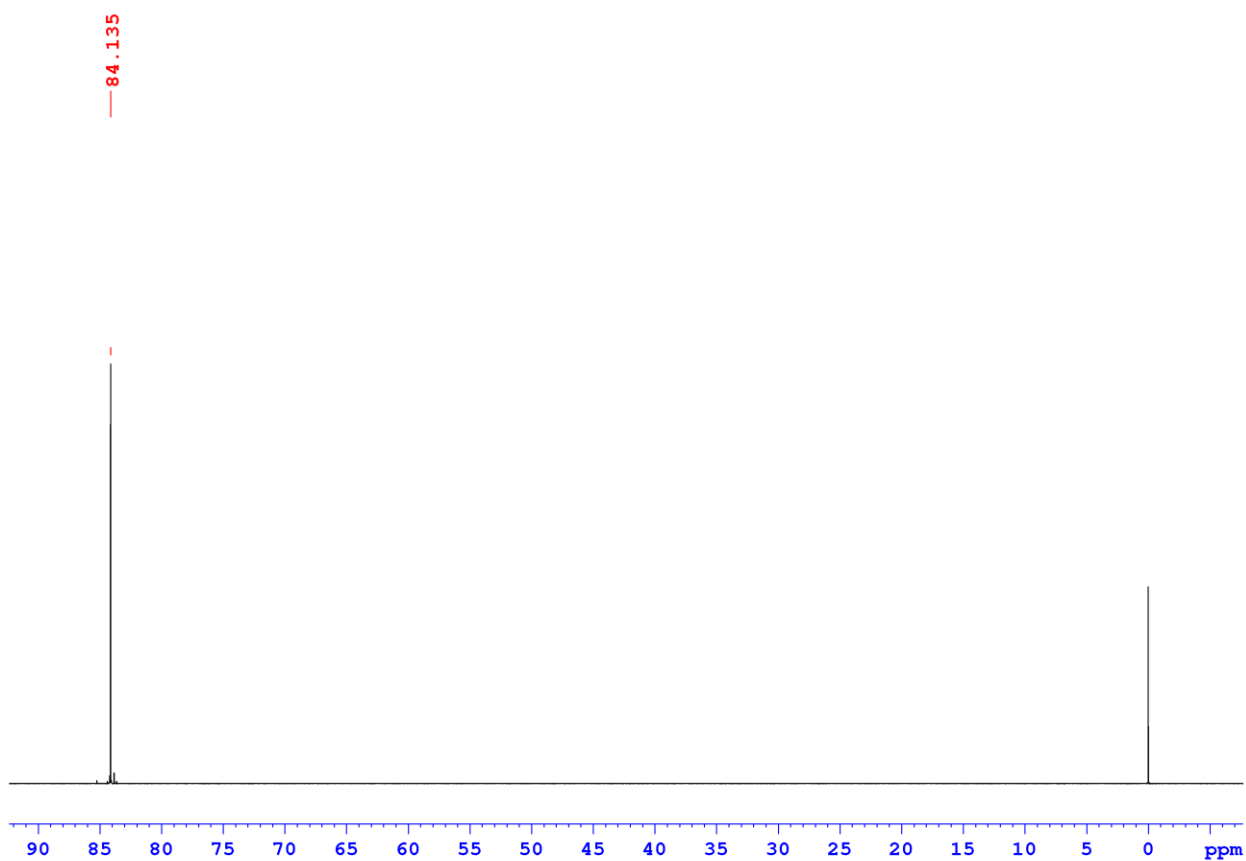

**Figure S38.**  $^{19}\text{F}$  NMR spectrum of **8b<sup>t</sup>**.

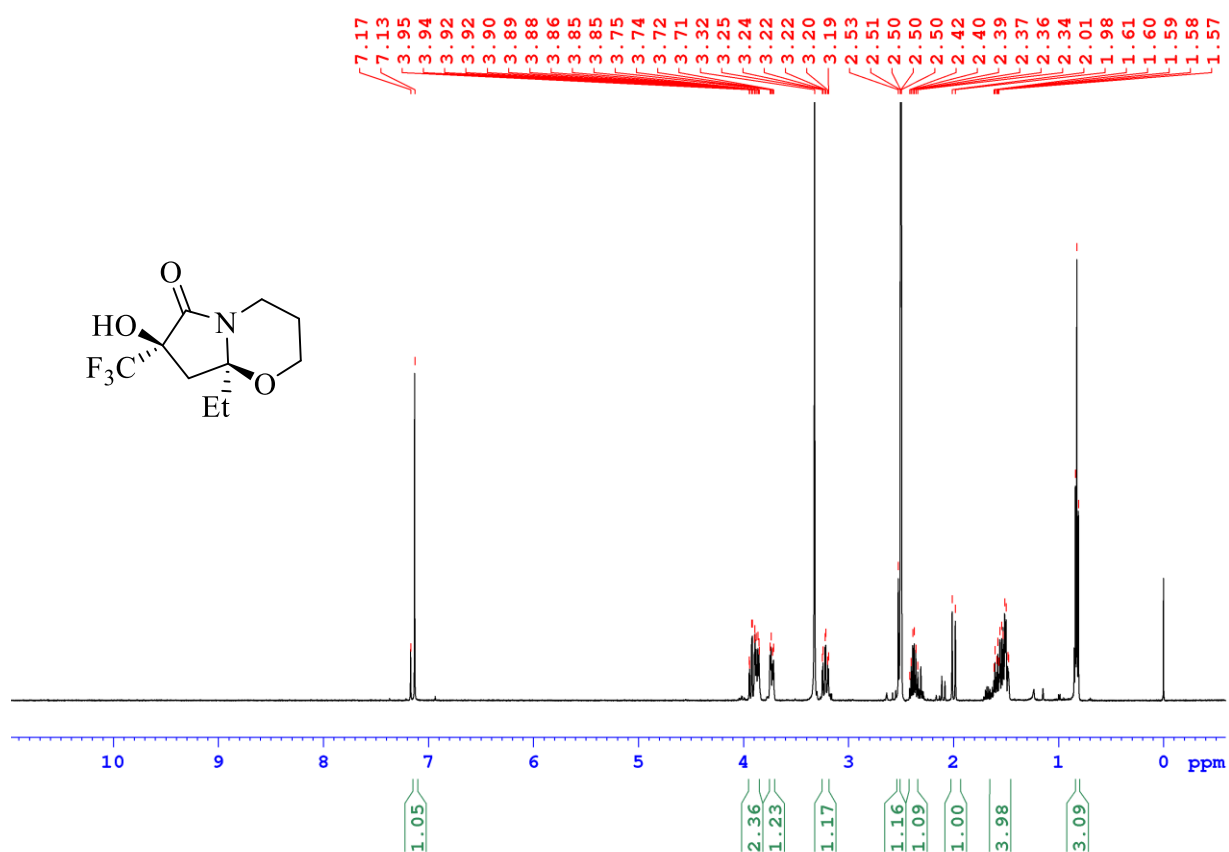

**Figure S39.** <sup>1</sup>H NMR spectrum of **8b<sup>c</sup>** (mixed with **8b<sup>t</sup>** in the ratio 81:19).

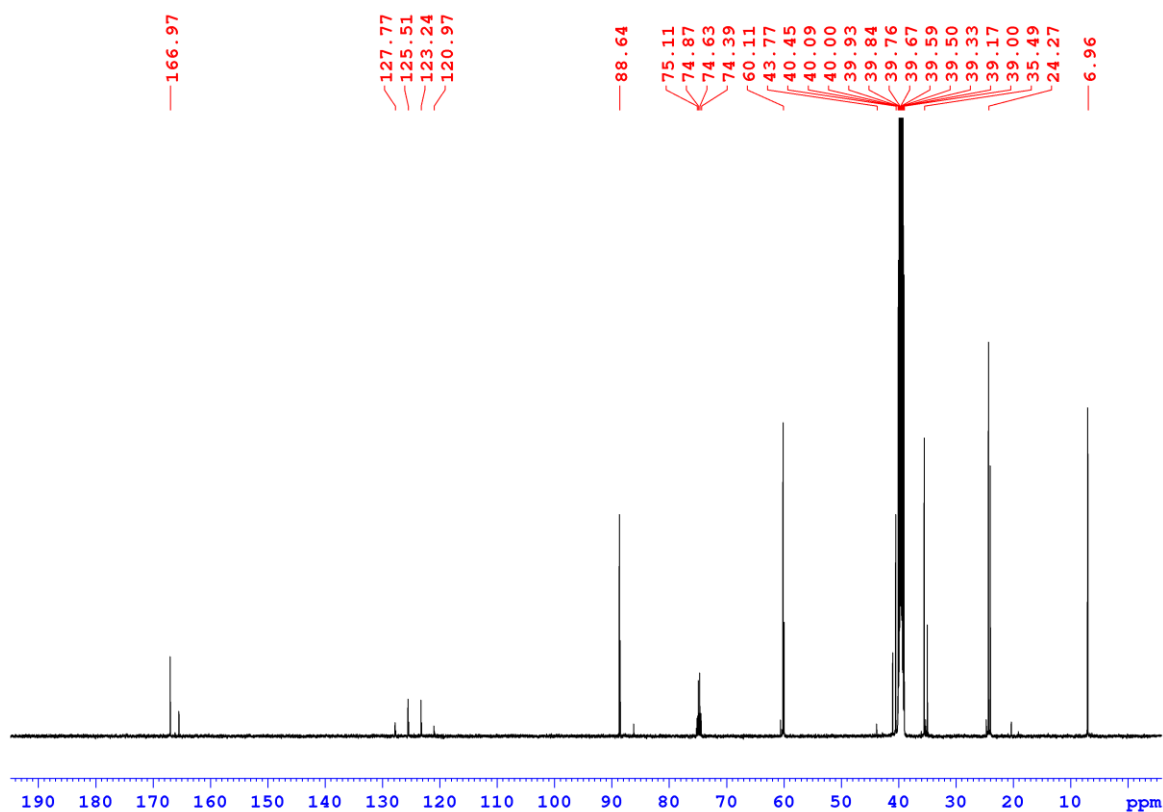

**Figure S40.** <sup>13</sup>C NMR spectrum of **8b<sup>c</sup>** (mixed with **8b<sup>t</sup>** in the ratio 81:19).

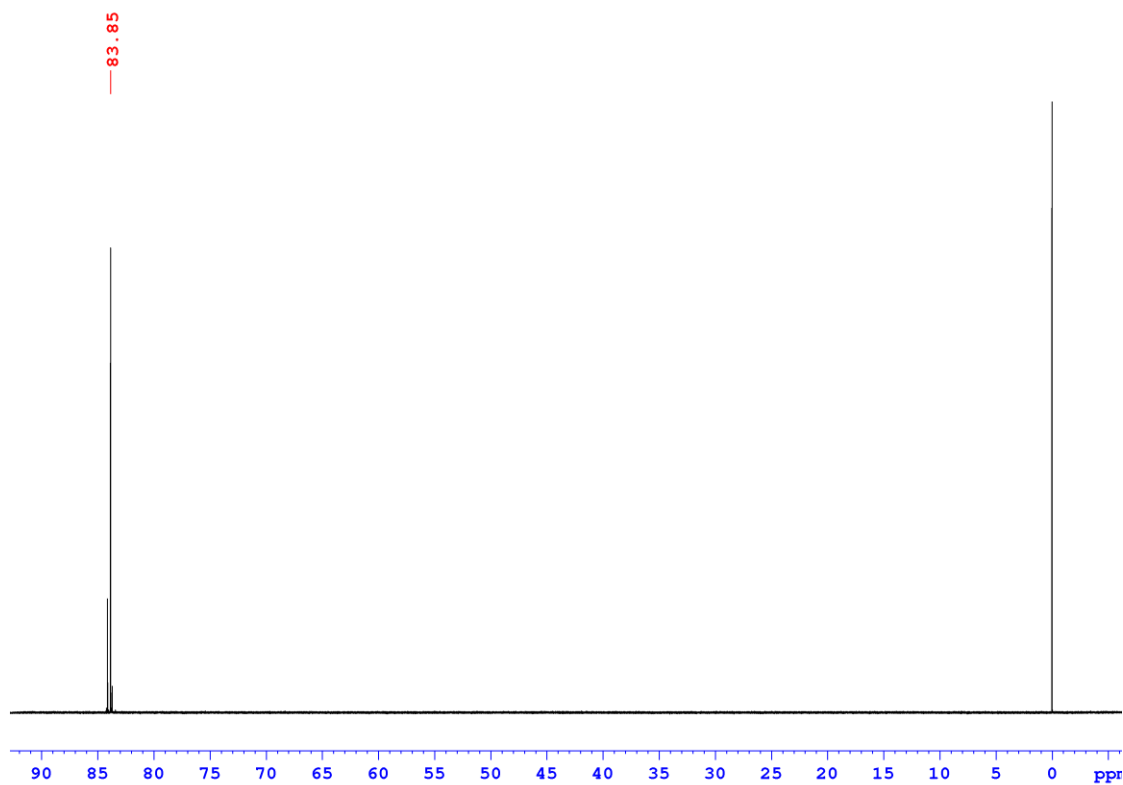

**Figure S41.**  $^{19}\text{F}$  NMR spectrum of **8b<sup>c</sup>** (mixed with **8b<sup>t</sup>** in the ratio 81:19).

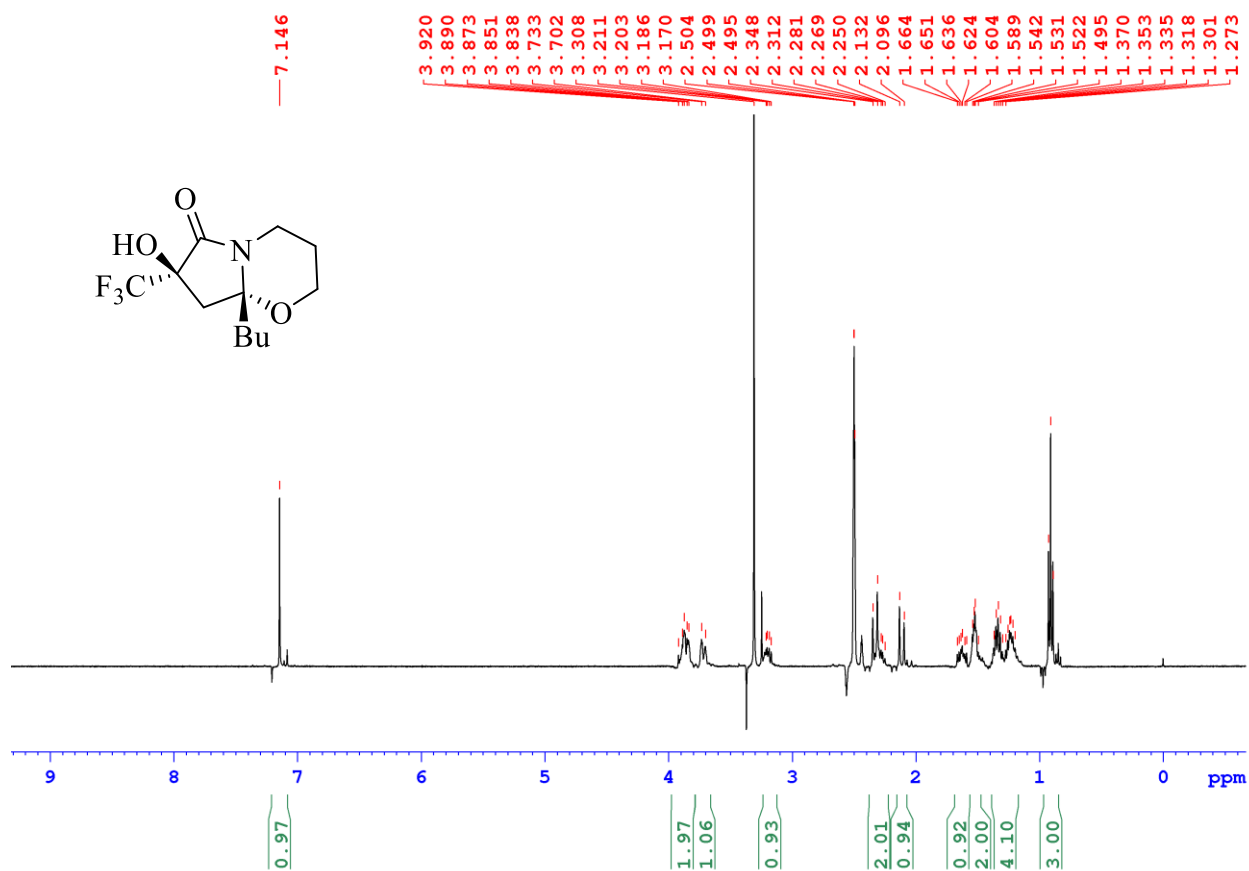

**Figure S42.**  $^1\text{H}$  NMR spectrum of **8c<sup>t</sup>**.



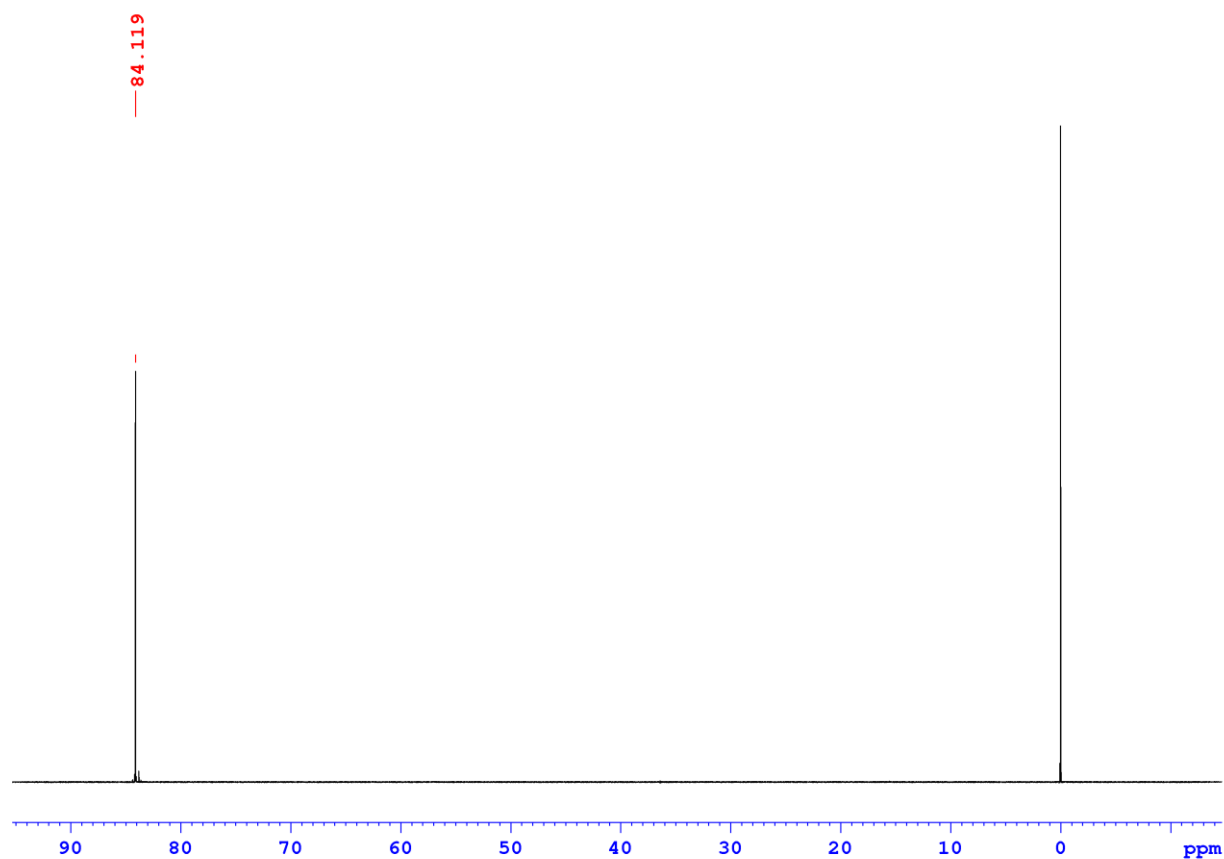

**Figure S43.** <sup>19</sup>F NMR spectrum of **8c<sup>t</sup>**.

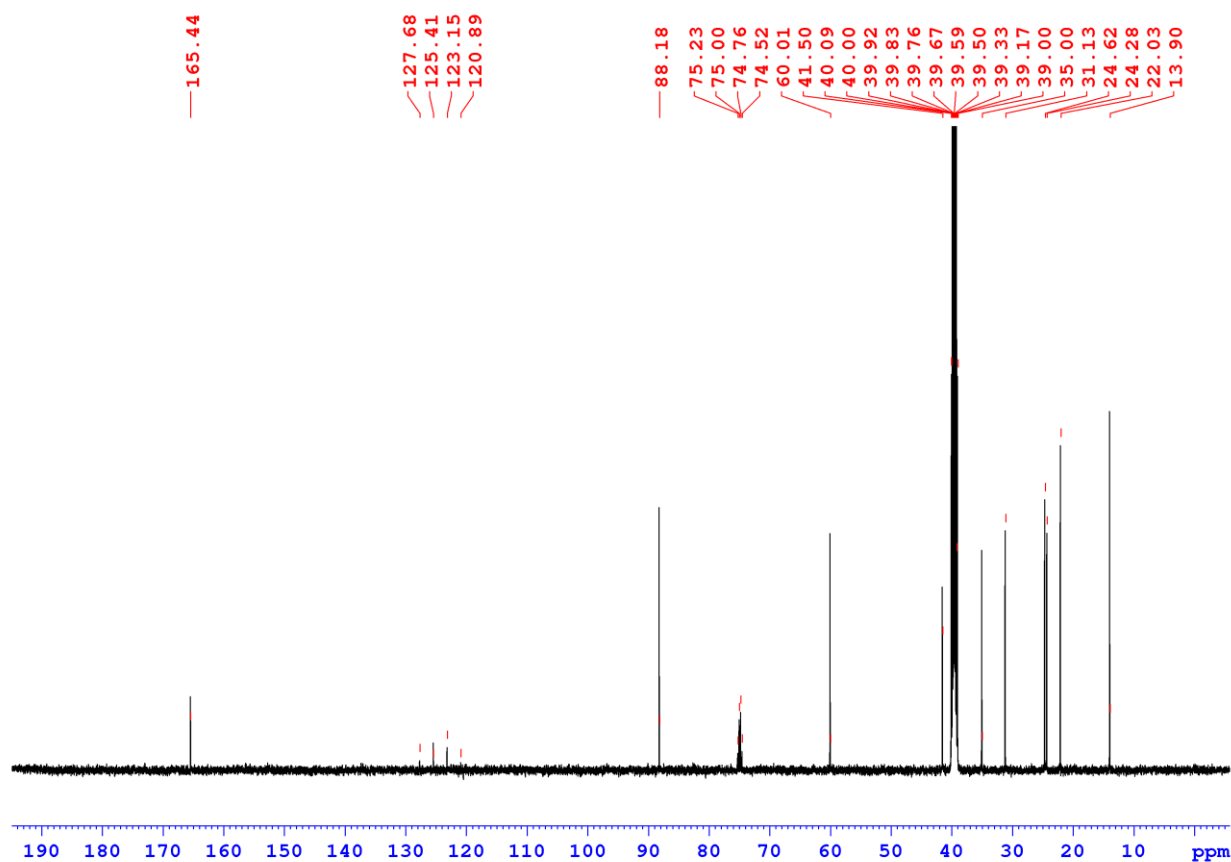

**Figure S44.** <sup>13</sup>C NMR spectrum of **8c<sup>t</sup>**.

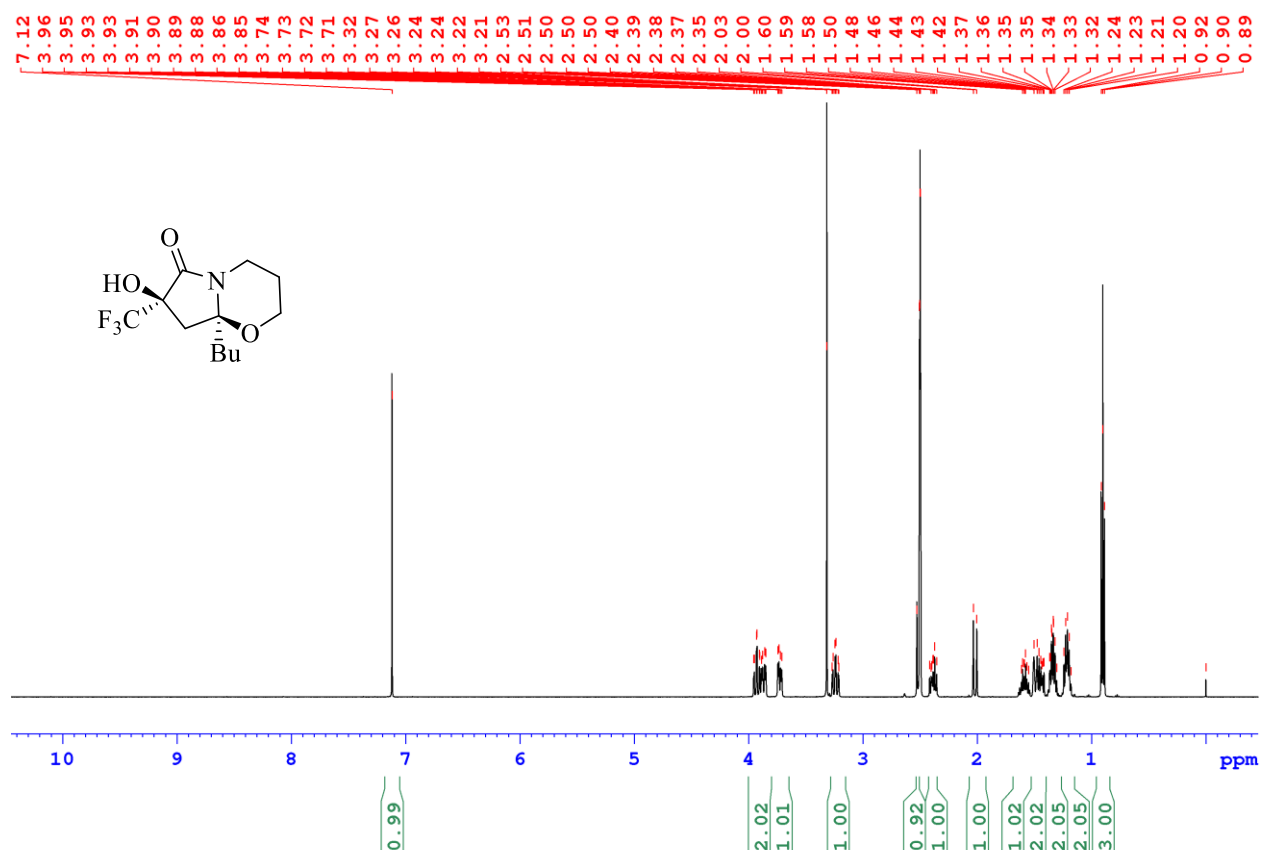

**Figure S45.** <sup>1</sup>H NMR spectrum of **8c**.

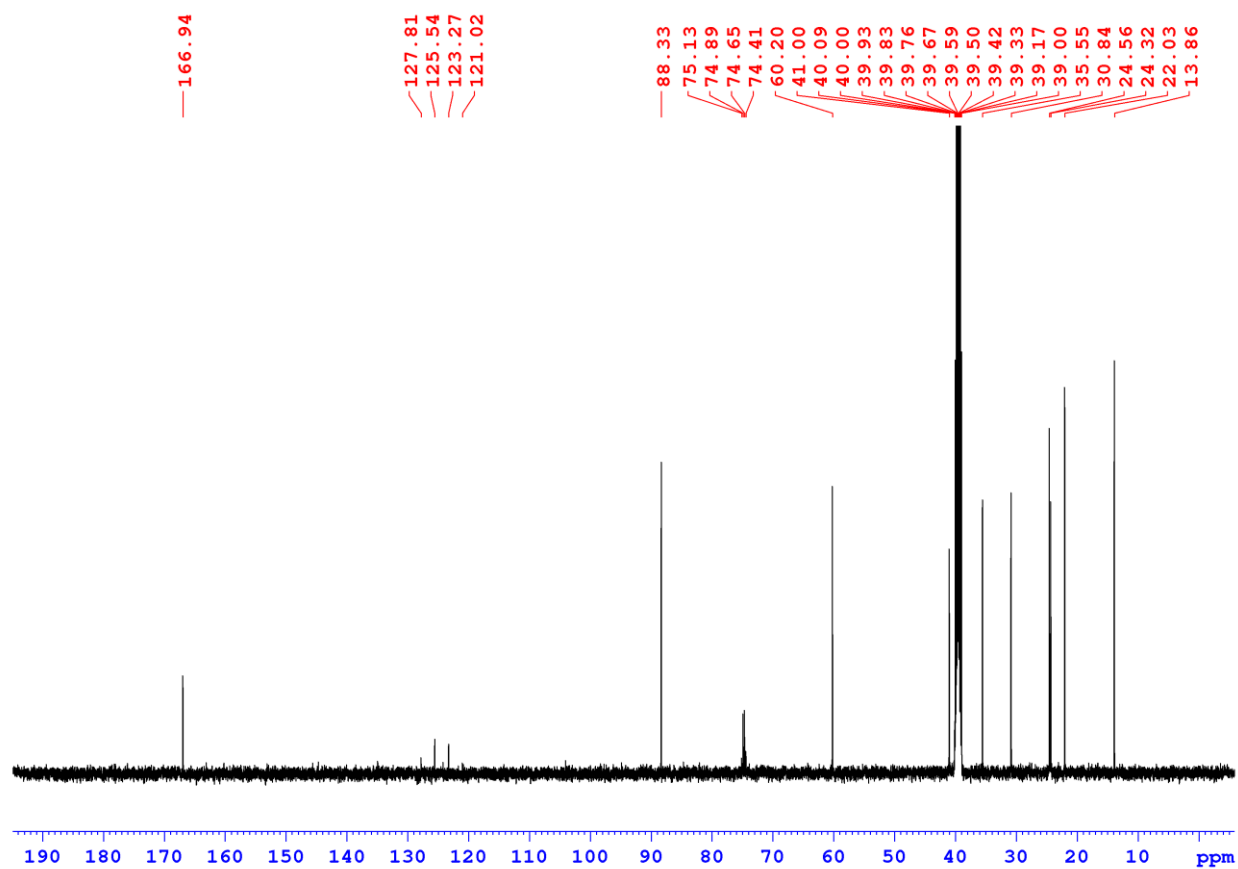

**Figure S46.** <sup>13</sup>C NMR spectrum of **8c**.

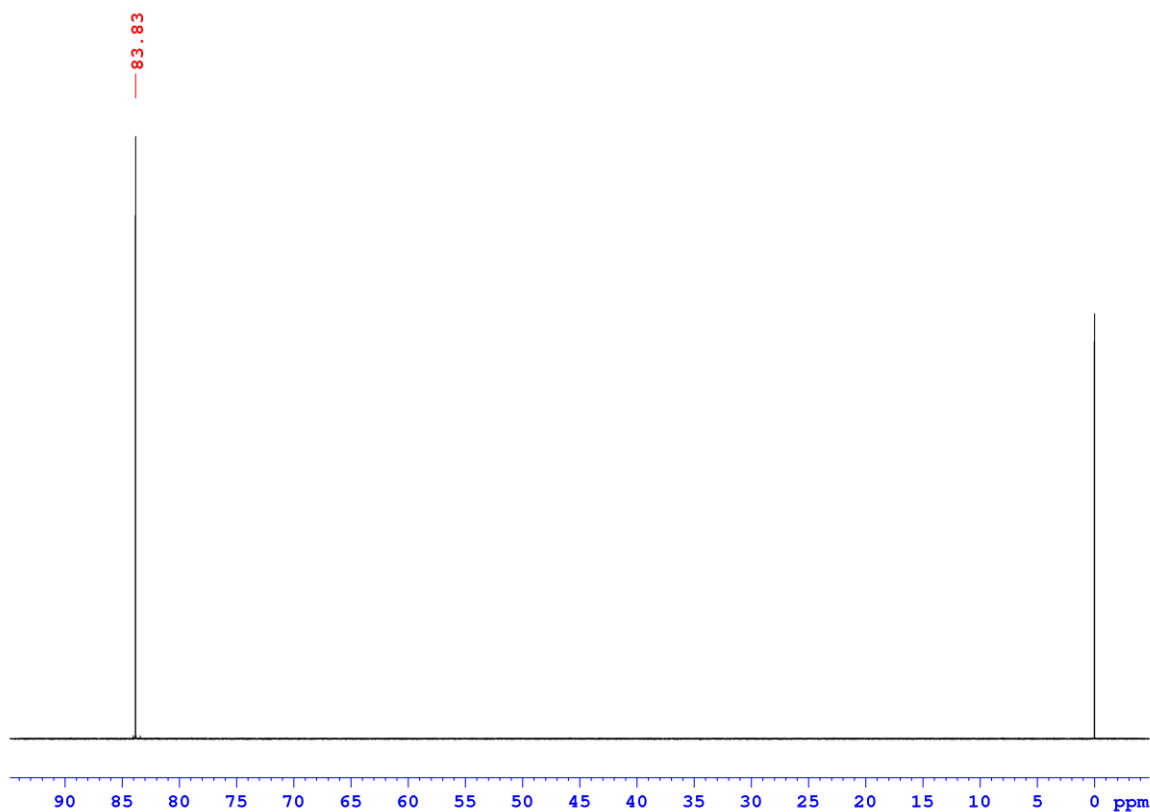

**Figure S47.** <sup>19</sup>F NMR spectrum of **8c**.

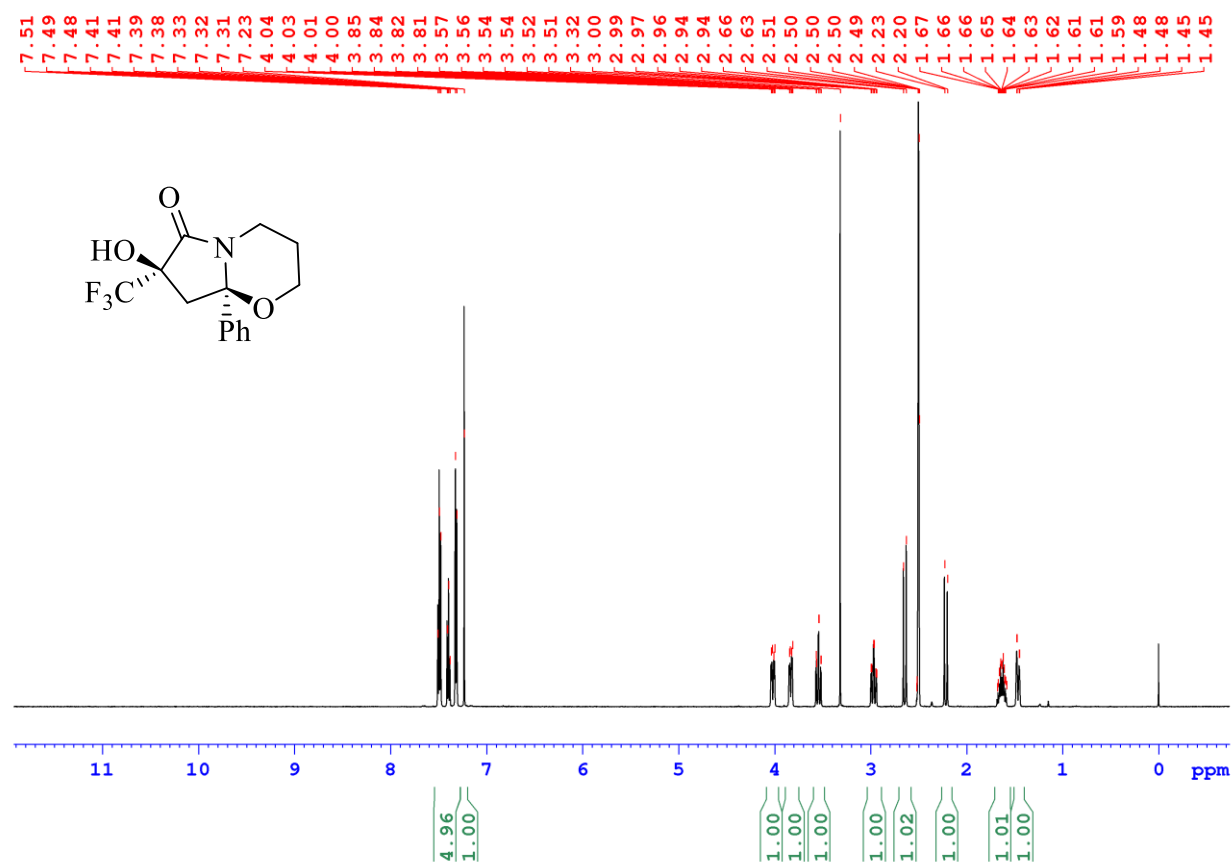

**Figure S48.** <sup>1</sup>H NMR spectrum of **8d**.

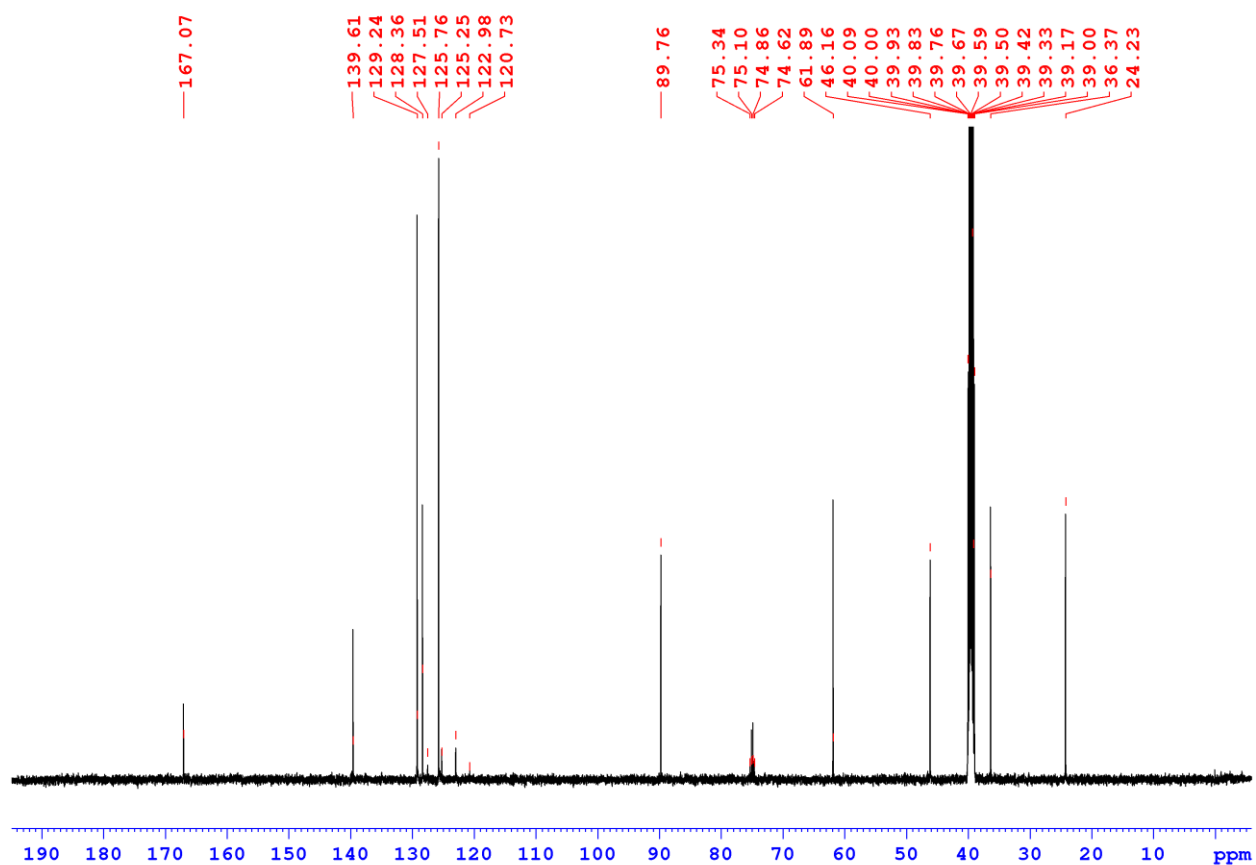

**Figure S49.** <sup>13</sup>C NMR spectrum of **8d<sup>t</sup>**.

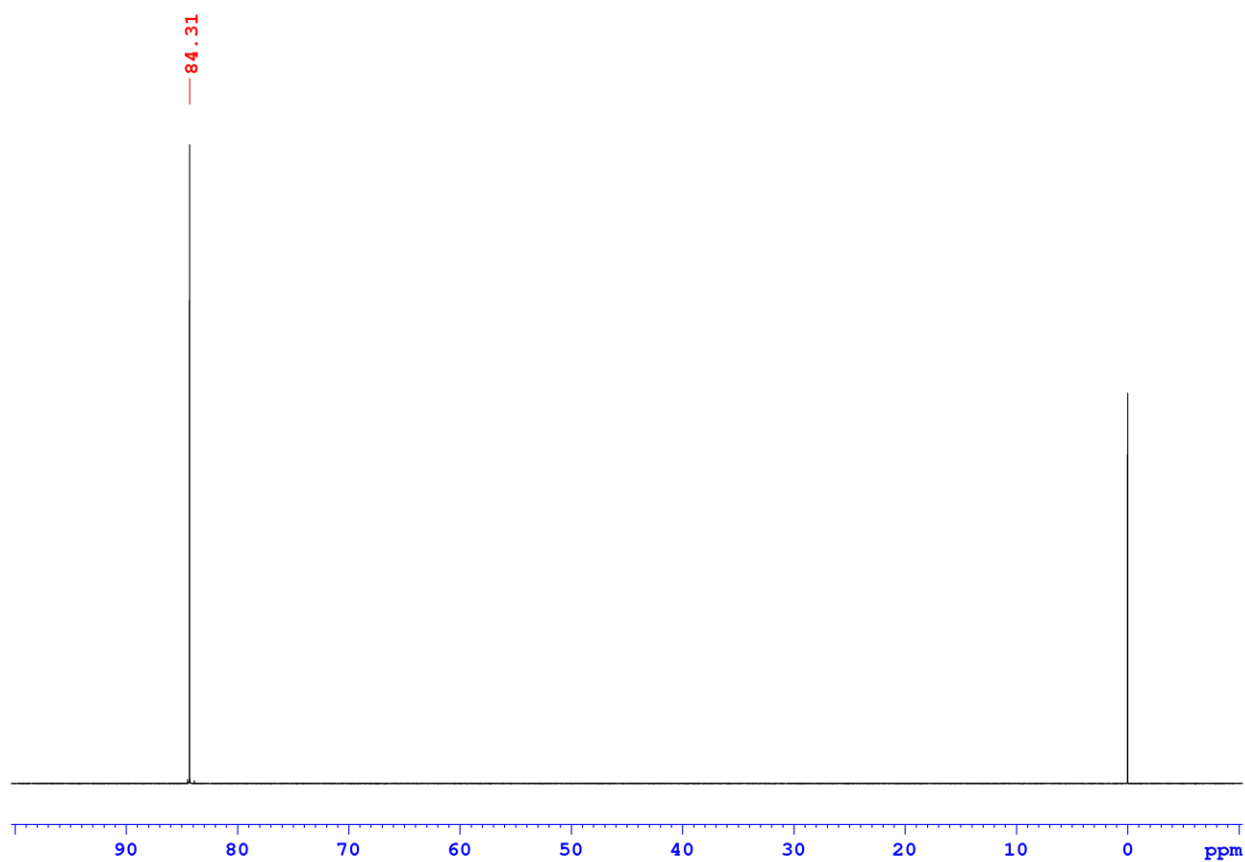

**Figure S50.** <sup>19</sup>F NMR spectrum of **8d<sup>t</sup>**.

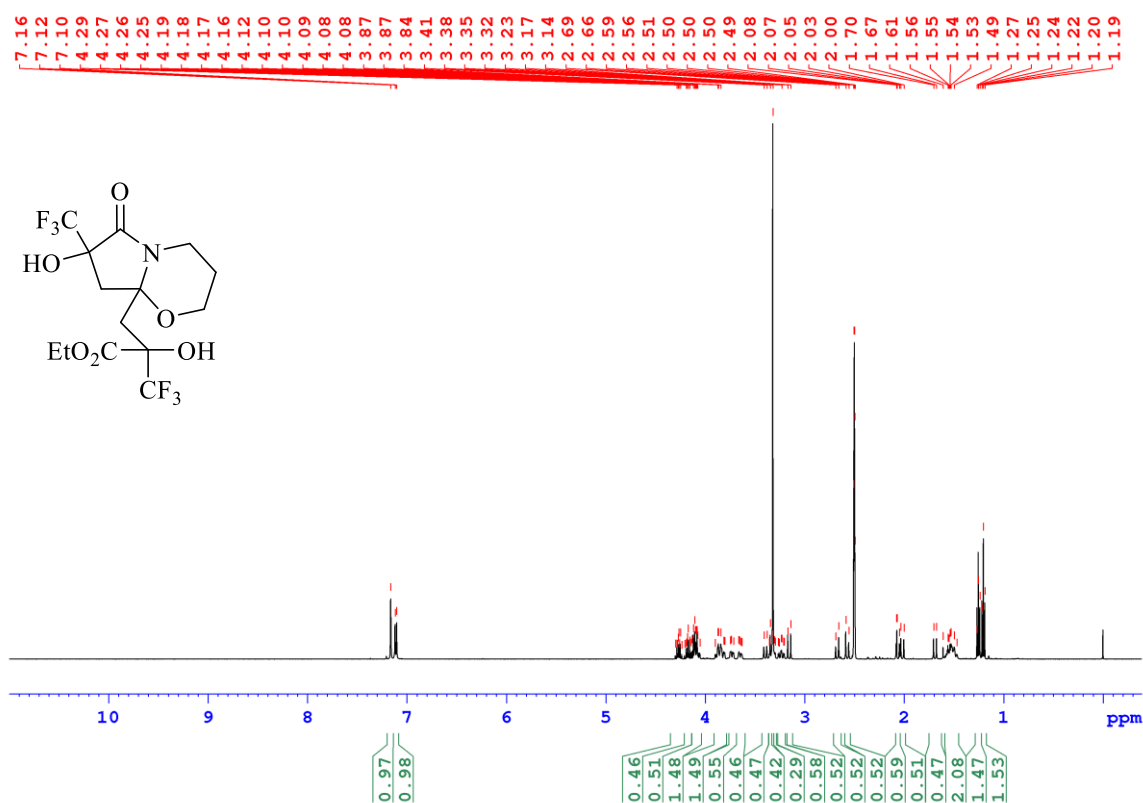

**Figure S51.** <sup>1</sup>H NMR spectrum of a mixture of **9** : **9'** in the  $\approx 1 : 1$ .

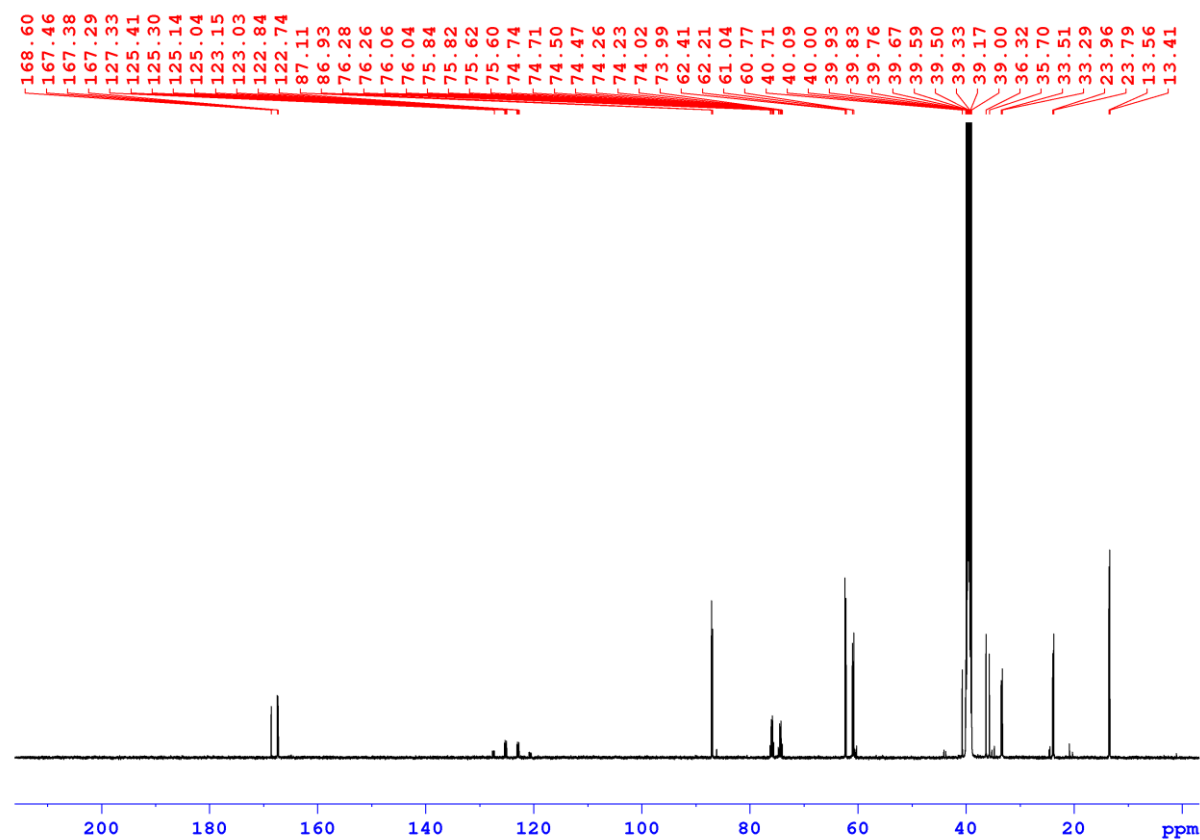

**Figure S52.** <sup>13</sup>C NMR spectrum of a mixture of **9** : **9'** in the ratio  $\approx 1 : 1$ .

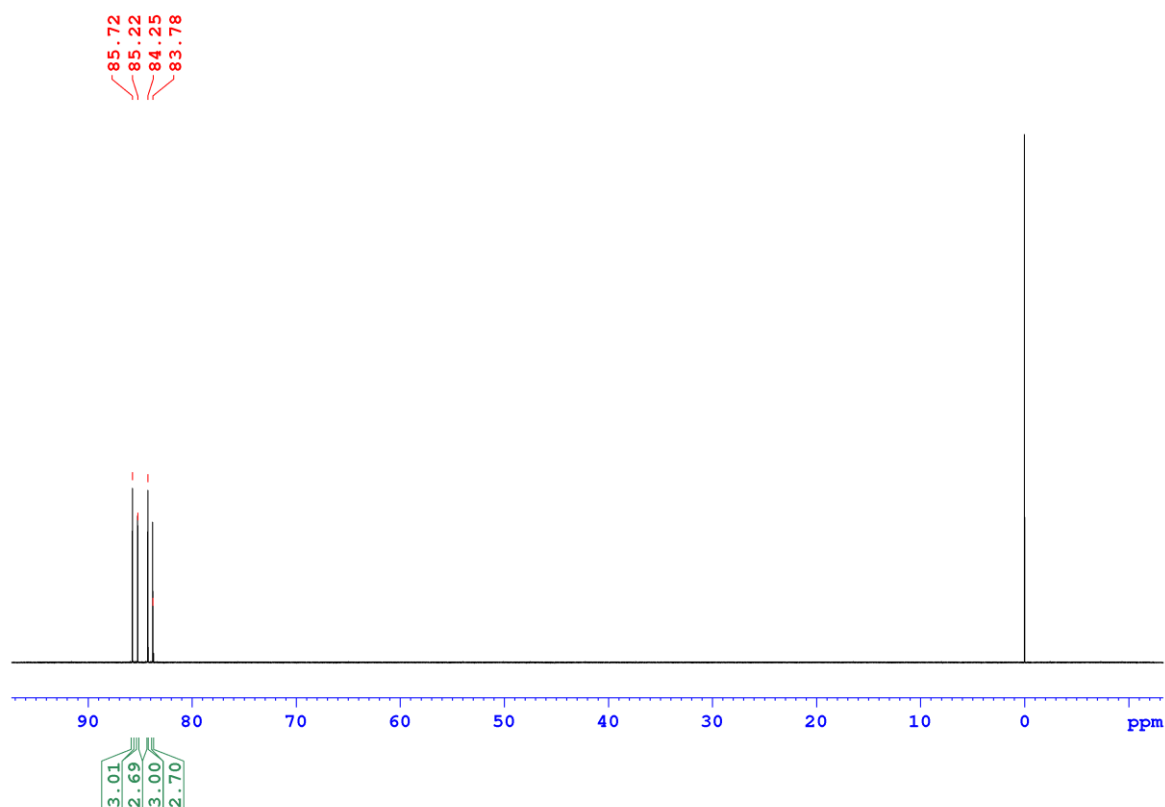

**Figure S53.**  $^{19}\text{F}$  NMR spectrum of mixture of **9** : **9'** in the ratio  $\approx 1 : 1$ .

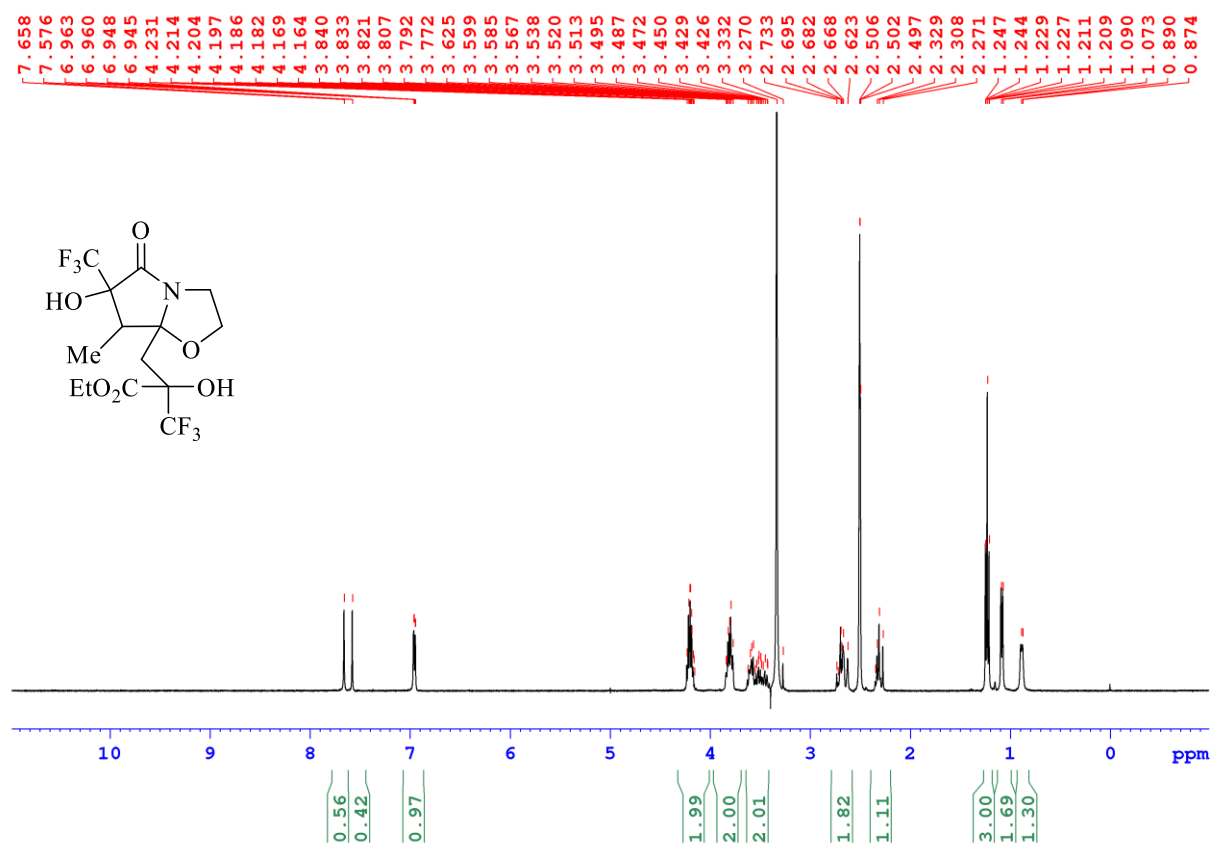

**Figure S54.**  $^1\text{H}$  NMR spectrum of mixture of **10** : **10'** in the ratio 56 : 44.

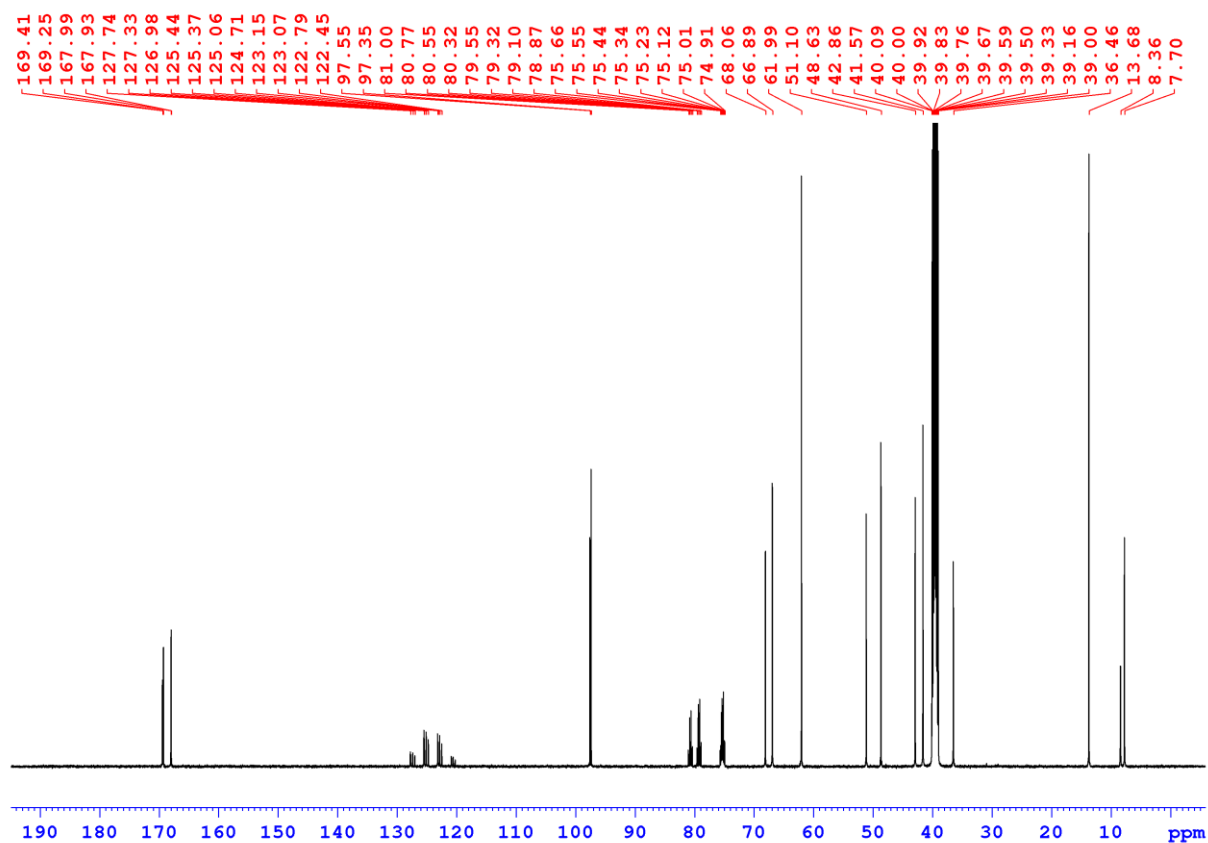

**Figure S55.** <sup>13</sup>C NMR spectrum of mixture of **10** : **10'** in the ratio 56 : 44.

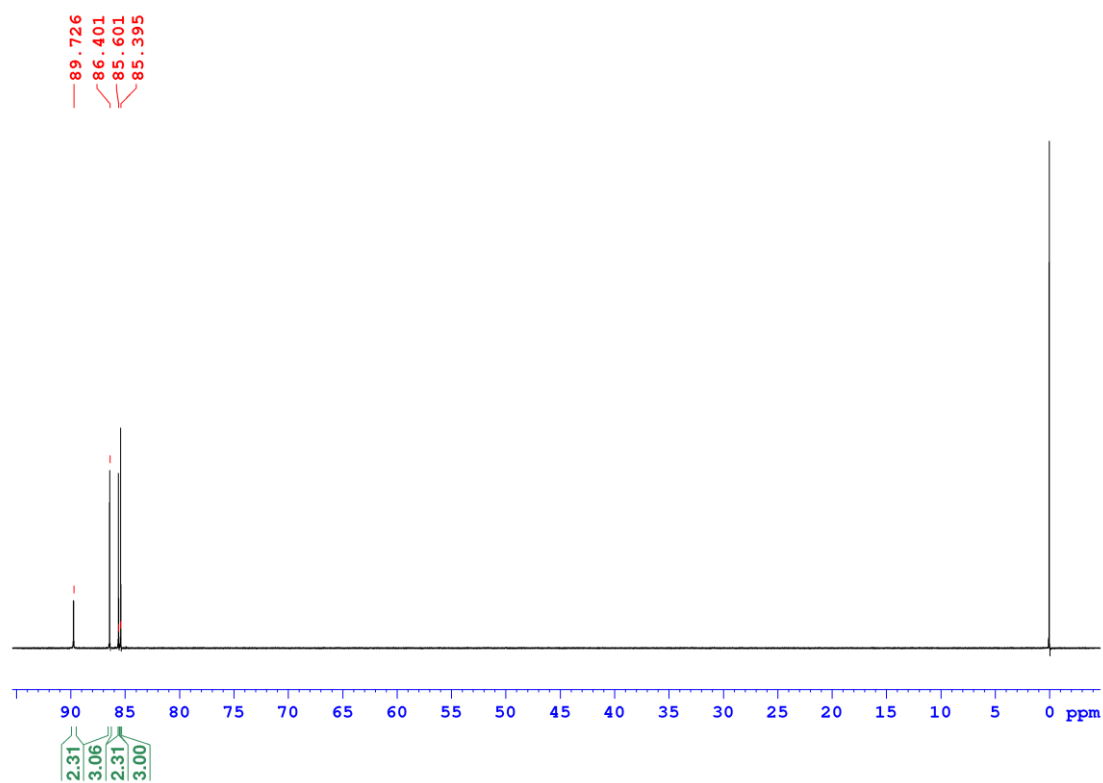

**Figure S56.** <sup>19</sup>F NMR spectrum of mixture of **10** : **10'** in the ratio 56 : 44.

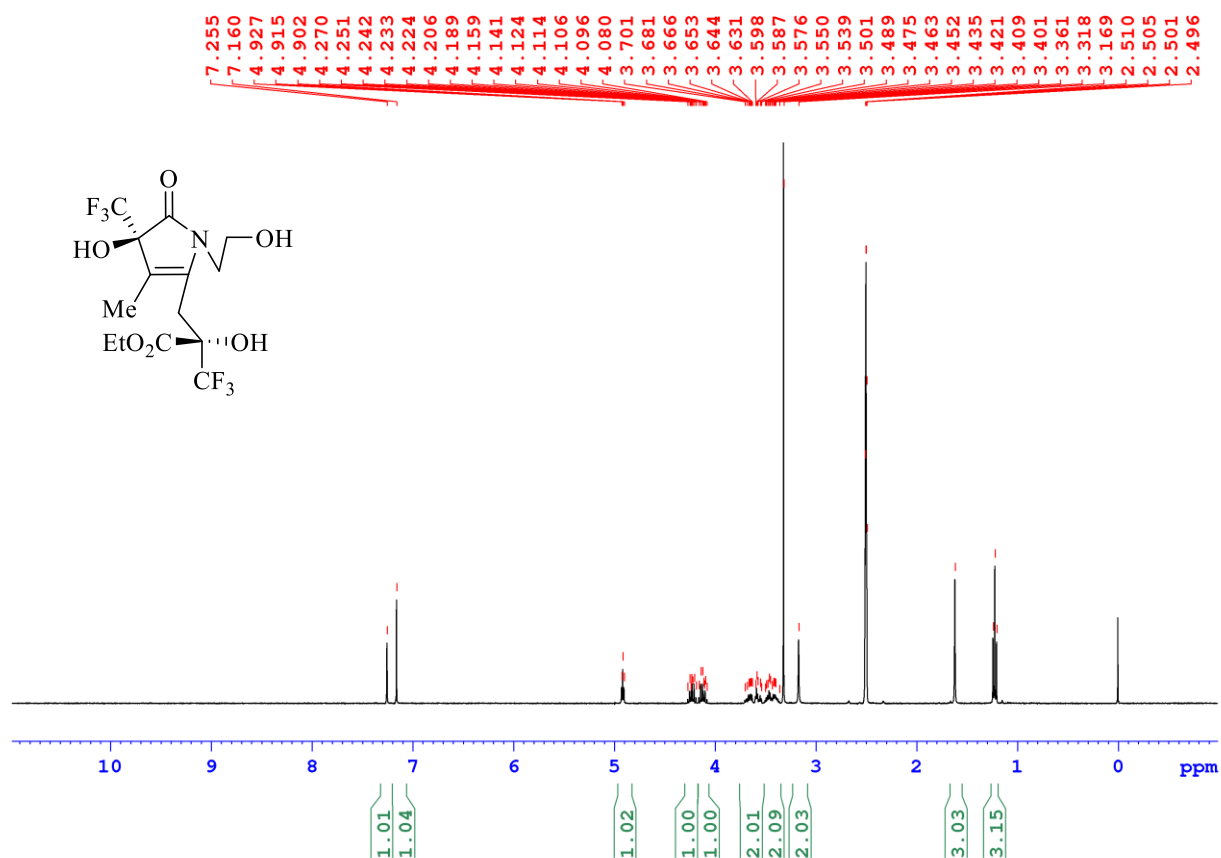

**Figure S57.** <sup>1</sup>H NMR spectrum of mixture of **11a**.

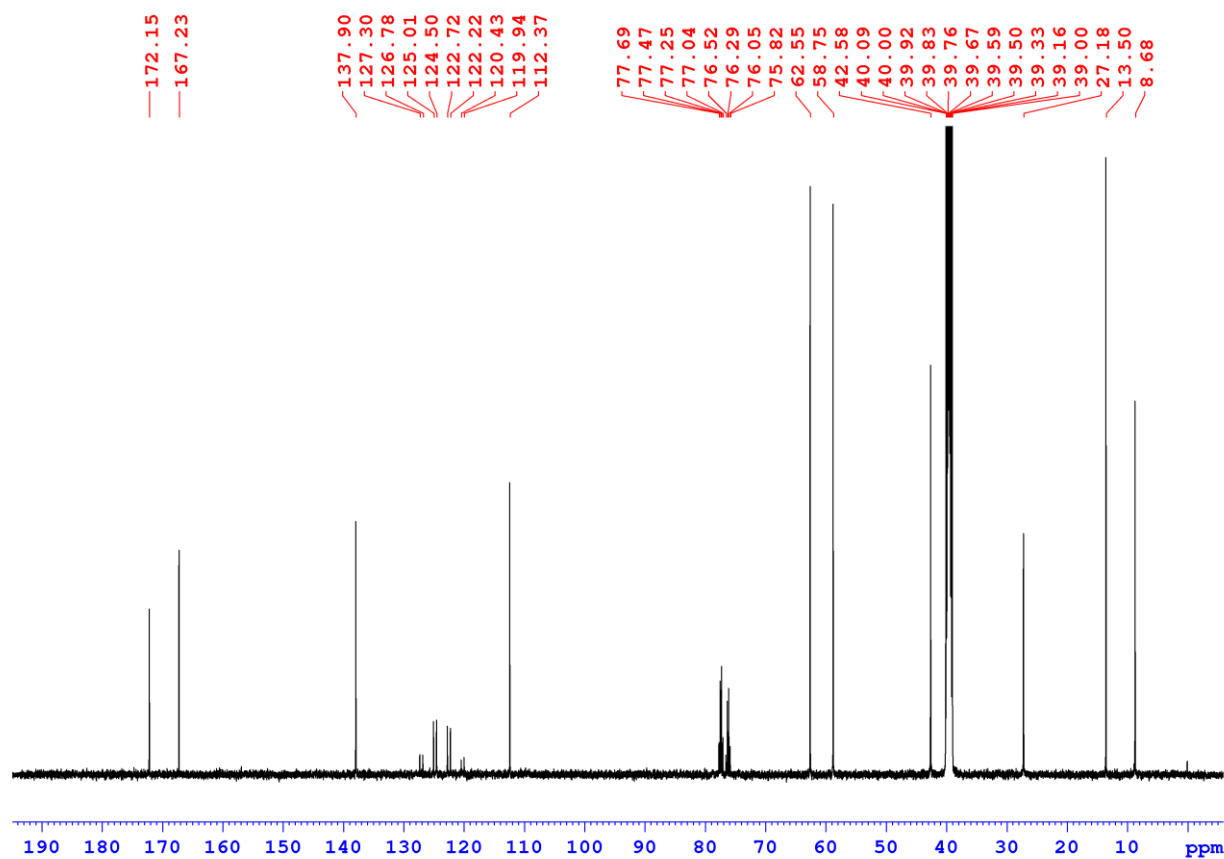

**Figure S58.** <sup>13</sup>C NMR spectrum of mixture of **11a**.



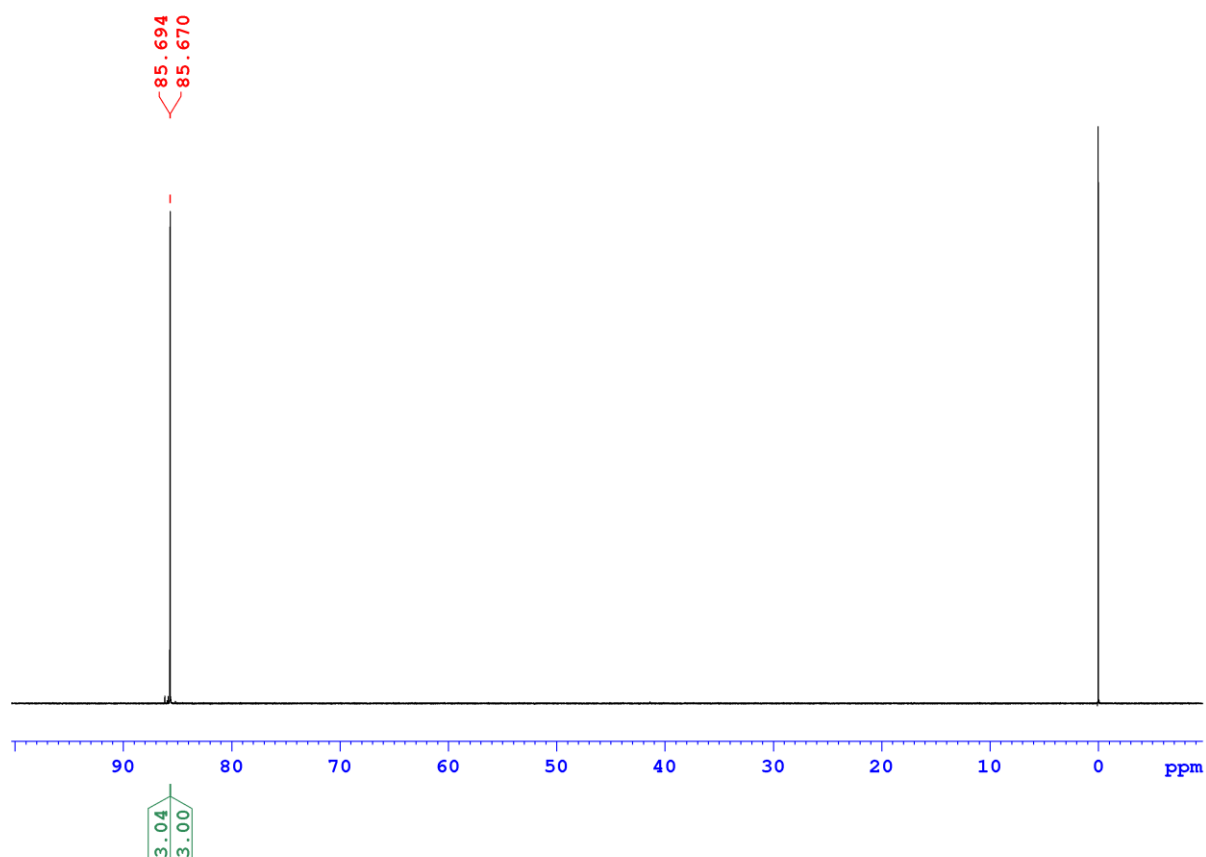

**Figure S59.** <sup>19</sup>F NMR spectrum of mixture of **11a**.

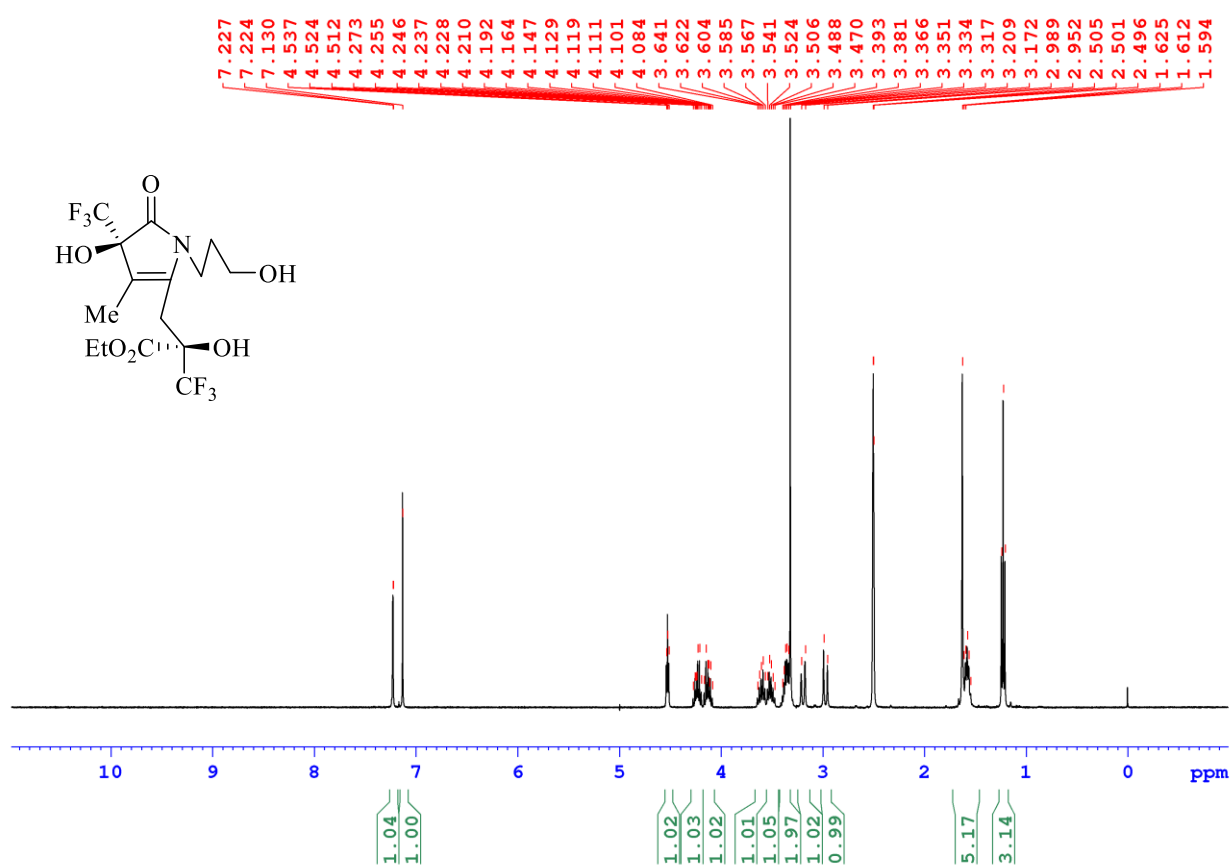

**Figure S60.** <sup>1</sup>H NMR spectrum of mixture of **11b**.

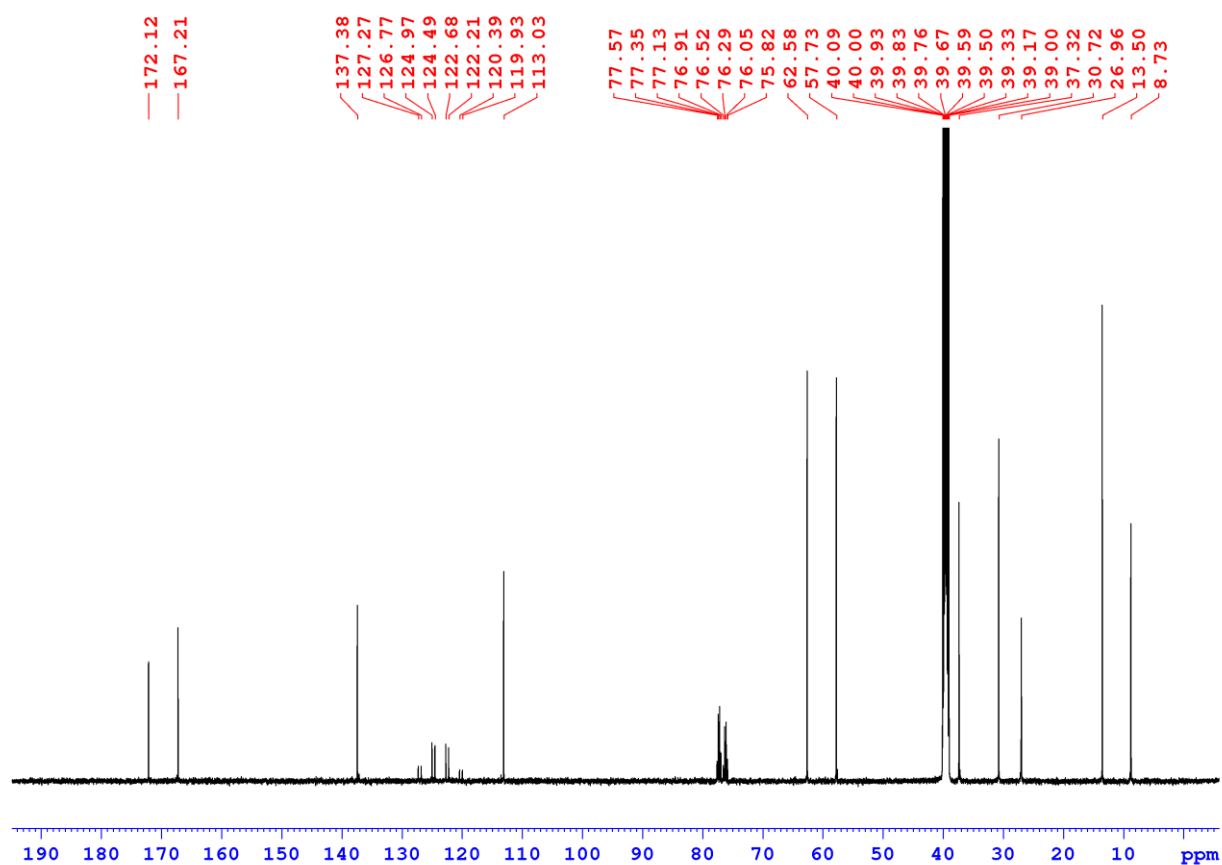

**Figure S61.**  $^{13}\text{C}$  NMR (126 MHz,  $\text{DMSO-d}_6$ ) spectrum of mixture of **11b**.

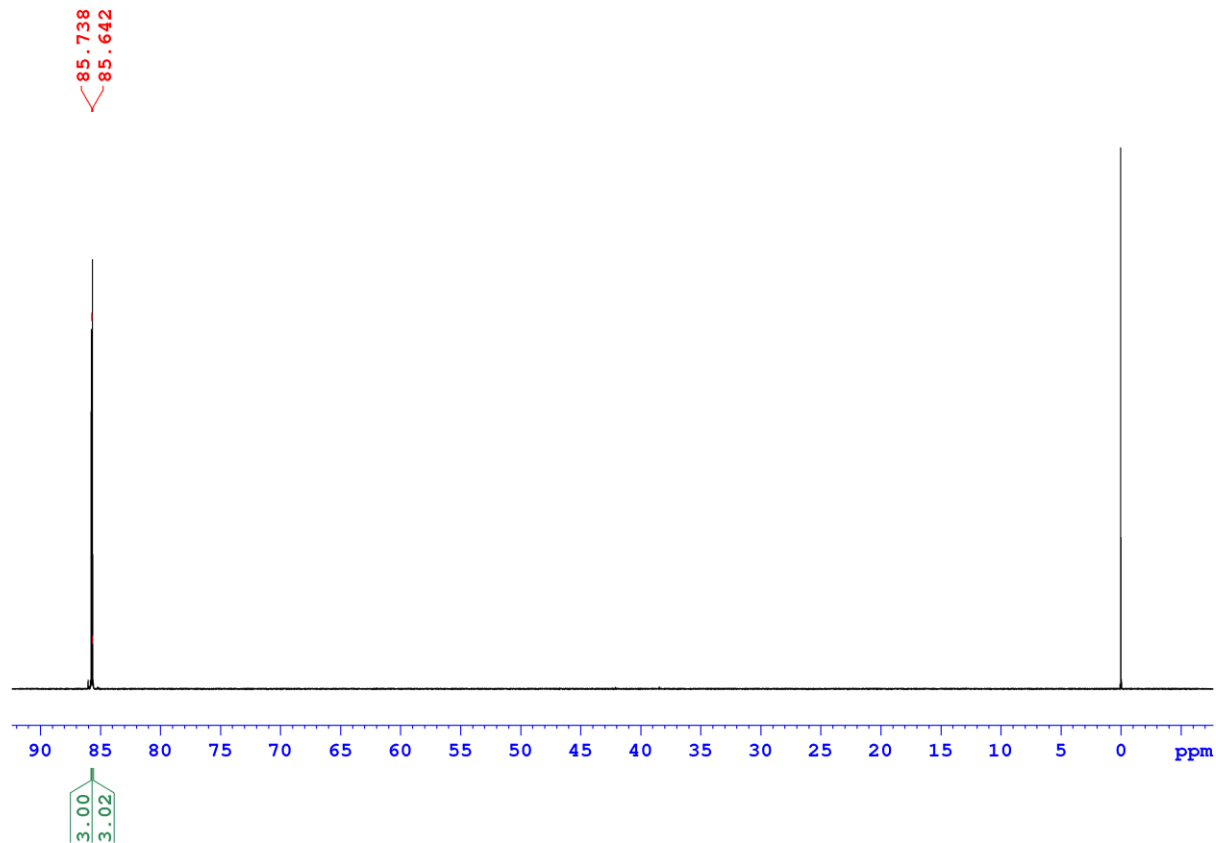

**Figure S62.**  $^{19}\text{F}$  NMR spectrum of mixture of **11b**.

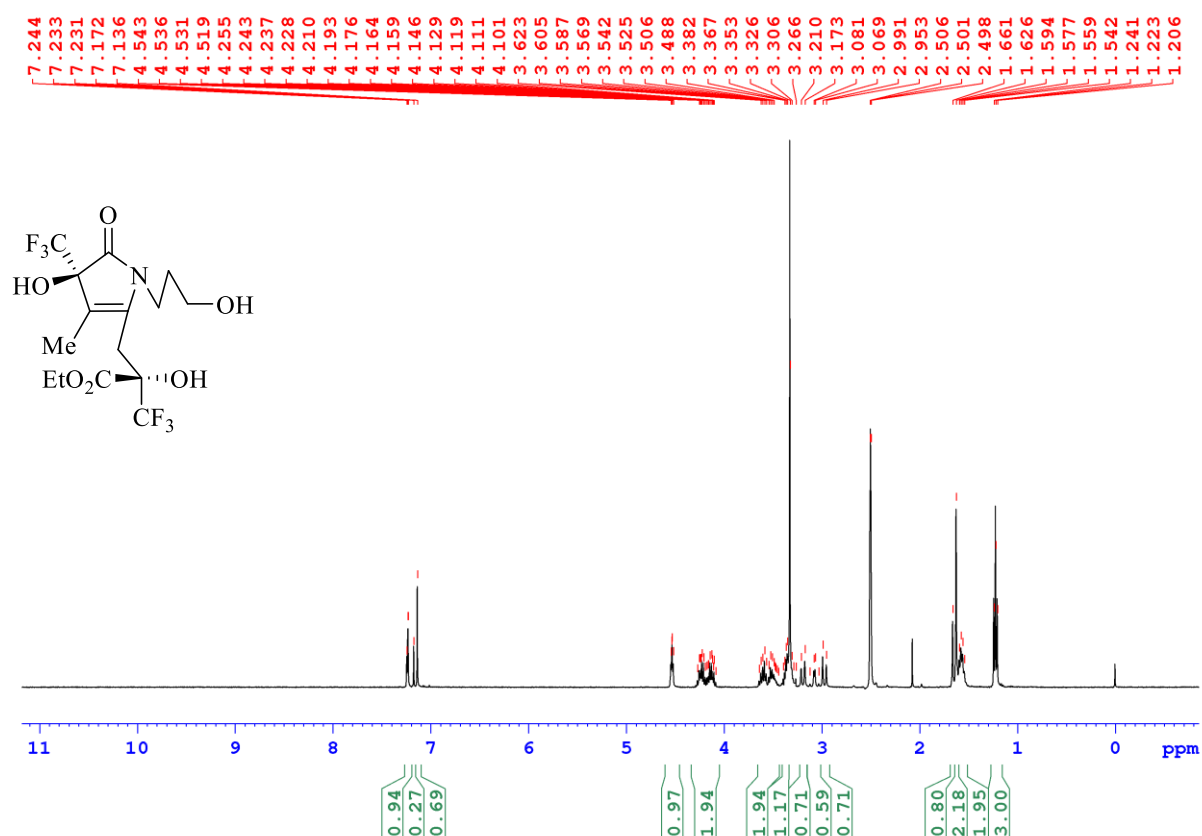

**Figure S63.** <sup>1</sup>H NMR spectrum of mixture of **11b** : **11b'** in the ratio 72 : 28.

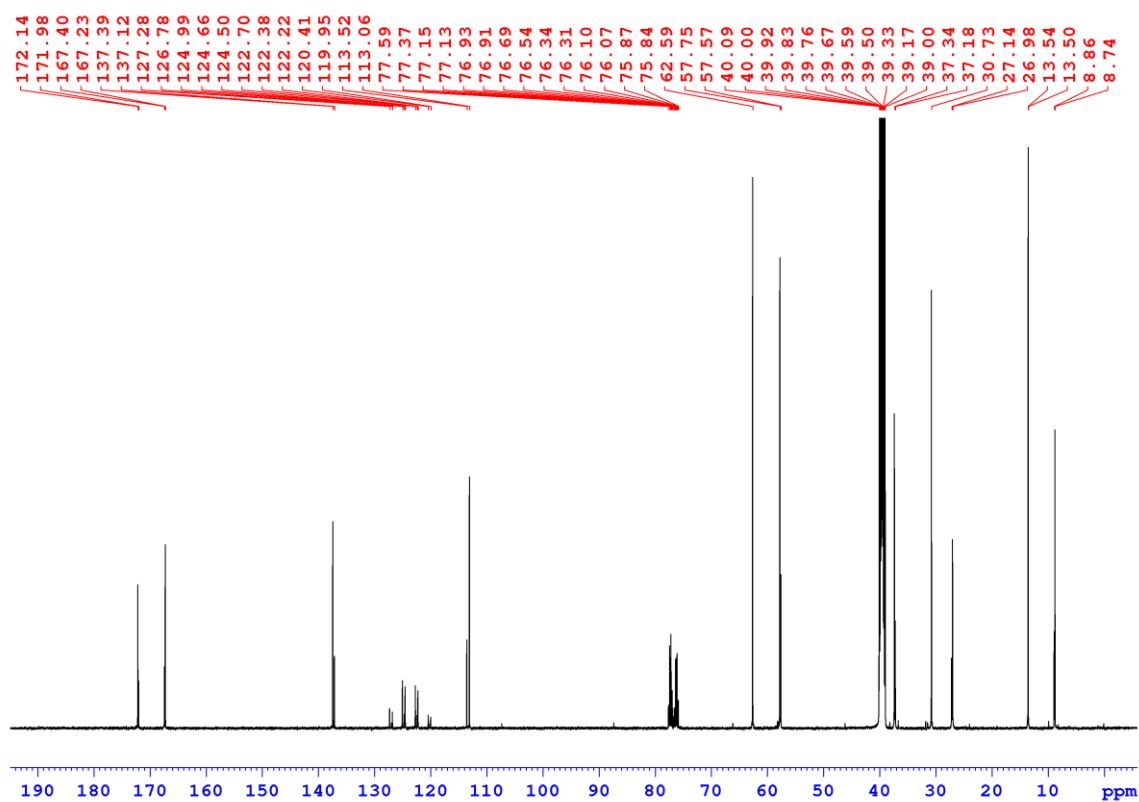

**Figure S64.** <sup>13</sup>C NMR spectrum of mixture of **11** : **11'** in the ratio 72 : 28.

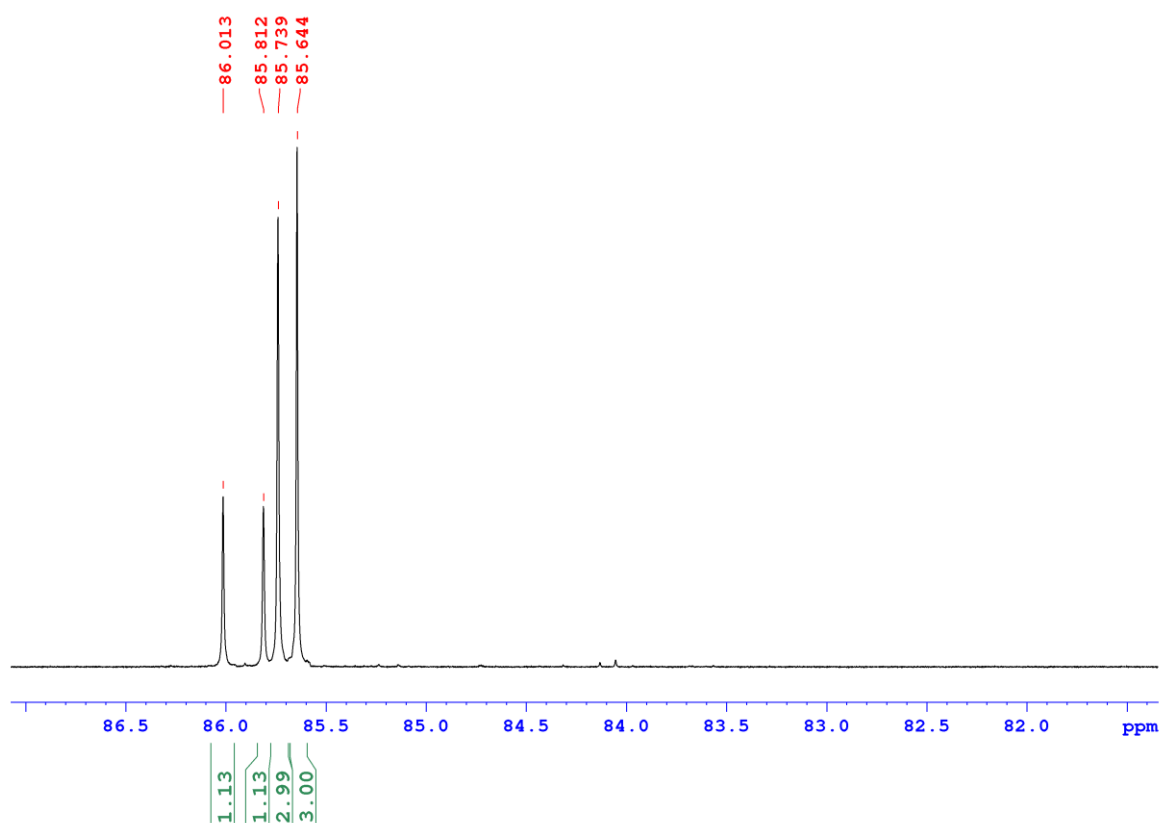

**Figure S65.**  $^{19}\text{F}$  NMR spectrum of mixture of **11** : **11'** in the ratio 72 : 28.
