# Supplementary material for: Multicomponent Domino Cyclization of Ethyl Trifluoropyruvate with Methyl Ketones and Amino Alcohols as A New Way to γ-Lactam Annulated Oxazacycles
Source: Molecules. 2023 Feb 20;28(4):1983. doi: 10.3390/molecules28041983 (PMC9967980; doi:10.3390/molecules28041983)
Supplement: Supplementary file 1 [file molecules-28-01983-s001.zip]

Archive with 9 entries (9 files):
- Supporting informations/11b.cif
- Supporting informations/4dc.cif
- Supporting informations/5tc.cif
- Supporting informations/8cc.cif
- Supporting informations/checkcif 11b.pdf
- Supporting informations/checkcif 4dc.pdf
- Supporting informations/checkcif 8cc.pdf
- Supporting informations/checkcif_5tc.pdf
- Supporting informations/Supporting information.pdf
