# Supplementary material for: Multicomponent Domino Cyclization of Ethyl Trifluoropyruvate with Methyl Ketones and Amino Alcohols as A New Way to γ-Lactam Annulated Oxazacycles
Source: Molecules. 2023 Feb 20;28(4):1983. doi: 10.3390/molecules28041983 (PMC9967980; doi:10.3390/molecules28041983)
Supplement: Supplementary file 1 [file molecules-28-01983-s001.zip › Supporting informations/4dc.cif]

data_exp_188
_audit_creation_date               2022-10-14
_audit_creation_method
;
Olex2 1.3
(compiled 2020.11.12 svn.r5f609507 for OlexSys, GUI svn.r6408)
;
_shelx_SHELXL_version_number       '2018/3'
_audit_contact_author_address      ?
_audit_contact_author_email        ?
_audit_contact_author_name         ''
_audit_contact_author_phone        ?
_publ_contact_author_id_orcid      ?
_publ_section_references
;
Dolomanov, O.V., Bourhis, L.J., Gildea, R.J, Howard, J.A.K. & Puschmann, H.
 (2009), J. Appl. Cryst. 42, 339-341.

Sheldrick, G.M. (2015). Acta Cryst. A71, 3-8.

Sheldrick, G.M. (2015). Acta Cryst. C71, 3-8.
;
_chemical_name_common              ?
_chemical_name_systematic          ?
_chemical_formula_moiety           'C13 H12 F3 N O3'
_chemical_formula_sum              'C13 H12 F3 N O3'
_chemical_formula_weight           287.24
_chemical_melting_point            ?
loop_
  _atom_type_symbol
  _atom_type_description
  _atom_type_scat_dispersion_real
  _atom_type_scat_dispersion_imag
  _atom_type_scat_source
 'C' 'C' 0.0033 0.0016 'International Tables Vol C Tables 4.2.6.8 and 6.1.1.4'
 'H' 'H' 0.0000 0.0000 'International Tables Vol C Tables 4.2.6.8 and 6.1.1.4'
 'F' 'F' 0.0171 0.0103 'International Tables Vol C Tables 4.2.6.8 and 6.1.1.4'
 'N' 'N' 0.0061 0.0033 'International Tables Vol C Tables 4.2.6.8 and 6.1.1.4'
 'O' 'O' 0.0106 0.0060 'International Tables Vol C Tables 4.2.6.8 and 6.1.1.4'

_shelx_space_group_comment
;
The symmetry employed for this shelxl refinement is uniquely defined
by the following loop, which should always be used as a source of
symmetry information in preference to the above space-group names.
They are only intended as comments.
;
_space_group_crystal_system        'triclinic'
_space_group_IT_number             2
_space_group_name_H-M_alt          'P -1'
_space_group_name_Hall             '-P 1'
loop_
  _space_group_symop_operation_xyz
 'x, y, z'
 '-x, -y, -z'

_cell_length_a                     6.0290(7)
_cell_length_b                     8.1542(10)
_cell_length_c                     13.4778(17)
_cell_angle_alpha                  79.481(10)
_cell_angle_beta                   86.443(10)
_cell_angle_gamma                  75.029(10)
_cell_volume                       629.27(14)
_cell_formula_units_Z              2
_cell_measurement_reflns_used      1530
_cell_measurement_temperature      295(2)
_cell_measurement_theta_max        26.9800
_cell_measurement_theta_min        4.4290
_shelx_estimated_absorpt_T_max     0.977
_shelx_estimated_absorpt_T_min     0.946
_exptl_absorpt_coefficient_mu      0.136
_exptl_absorpt_correction_T_max    1.00000
_exptl_absorpt_correction_T_min    0.81043
_exptl_absorpt_correction_type     multi-scan
_exptl_absorpt_process_details
;
CrysAlisPro 1.171.41.123a (Rigaku Oxford Diffraction, 2022)
Empirical absorption correction using spherical harmonics,
implemented in SCALE3 ABSPACK scaling algorithm.
;
_exptl_absorpt_special_details     ?
_exptl_crystal_colour              colourless
_exptl_crystal_colour_primary      colourless
_exptl_crystal_density_diffrn      1.516
_exptl_crystal_density_meas        ?
_exptl_crystal_density_method      ?
_exptl_crystal_description         block
_exptl_crystal_F_000               296
_exptl_crystal_size_max            0.41
_exptl_crystal_size_mid            0.29
_exptl_crystal_size_min            0.17
_exptl_transmission_factor_max     ?
_exptl_transmission_factor_min     ?
_diffrn_reflns_av_R_equivalents    0.0434
_diffrn_reflns_av_unetI/netI       0.0881
_diffrn_reflns_Laue_measured_fraction_full  0.981
_diffrn_reflns_Laue_measured_fraction_max  0.836
_diffrn_reflns_limit_h_max         8
_diffrn_reflns_limit_h_min         -8
_diffrn_reflns_limit_k_max         10
_diffrn_reflns_limit_k_min         -11
_diffrn_reflns_limit_l_max         18
_diffrn_reflns_limit_l_min         -15
_diffrn_reflns_number              5481
_diffrn_reflns_point_group_measured_fraction_full  0.981
_diffrn_reflns_point_group_measured_fraction_max  0.836
_diffrn_reflns_theta_full          25.242
_diffrn_reflns_theta_max           30.915
_diffrn_reflns_theta_min           3.683
_diffrn_ambient_temperature        295(2)
_diffrn_detector_area_resol_mean   16.5253
_diffrn_detector_type              Sapphire3
_diffrn_measured_fraction_theta_full  0.981
_diffrn_measured_fraction_theta_max  0.836
_diffrn_measurement_details
;
List of Runs (angles in degrees, time in seconds):

  # Type    Start    End  Width  t~exp~   \w     \q     \k     \f   Frames
--------------------------------------------------------------------------
  1  \w     22.00  47.00   1.00   40.00    --   21.45-138.00  17.00   25
  2  \w     18.00  43.00   1.00   40.00    --   21.45-132.00-166.00   25
  3  \w    -86.00 -60.00   1.00   40.00    --  -23.01 138.00  79.00   26
  4  \w    -82.00 -48.00   1.00   40.00    --  -23.01 132.00 -96.00   34
  5  \w    -39.00  46.00   1.00   40.00    --   21.45 -77.00 150.00   85
  6  \w    -39.00   1.00   1.00   40.00    --  -23.01 -77.00-180.00   40
  7  \w    -91.00  -5.00   1.00   40.00    --  -23.01 -57.00 -90.00   86
  8  \w    -59.00  49.00   1.00   40.00    --  -23.01  19.00  90.00  108
;
_diffrn_measurement_device         'four-circle diffractometer'
_diffrn_measurement_device_type    'Xcalibur, Sapphire3'
_diffrn_measurement_method         '\w scans'
_diffrn_radiation_type             MoK\a
_diffrn_radiation_wavelength       0.71073
_diffrn_source                     ?
_reflns_Friedel_coverage           0.000
_reflns_Friedel_fraction_full      .
_reflns_Friedel_fraction_max       .
_reflns_number_gt                  1620
_reflns_number_total               3339
_reflns_special_details
;
 Reflections were merged by SHELXL according to the crystal
 class for the calculation of statistics and refinement.
 
 _reflns_Friedel_fraction is defined as the number of unique
 Friedel pairs measured divided by the number that would be
 possible theoretically, ignoring centric projections and
 systematic absences.
;
_reflns_threshold_expression       'I > 2\s(I)'
_computing_cell_refinement         'CrysAlisPro 1.171.41.123a (Rigaku OD, 2022)'
_computing_data_collection         'CrysAlisPro 1.171.41.123a (Rigaku OD, 2022)'
_computing_data_reduction          'CrysAlisPro 1.171.41.123a (Rigaku OD, 2022)'
_computing_molecular_graphics      'Olex2 1.3 (Dolomanov et al., 2009)'
_computing_publication_material    'Olex2 1.3 (Dolomanov et al., 2009)'
_computing_structure_refinement    'SHELXL 2018/3 (Sheldrick, 2015)'
_computing_structure_solution      'SHELXT 2018/2 (Sheldrick, 2018)'
_refine_diff_density_max           0.256
_refine_diff_density_min           -0.240
_refine_diff_density_rms           0.059
_refine_ls_extinction_coef         0.050(10)
_refine_ls_extinction_expression  
 'Fc^*^=kFc[1+0.001xFc^2^\l^3^/sin(2\q)]^-1/4^'
_refine_ls_extinction_method       'SHELXL-2018/3 (Sheldrick 2018)'
_refine_ls_goodness_of_fit_ref     1.015
_refine_ls_hydrogen_treatment      mixed
_refine_ls_matrix_type             full
_refine_ls_number_parameters       186
_refine_ls_number_reflns           3339
_refine_ls_number_restraints       0
_refine_ls_R_factor_all            0.1428
_refine_ls_R_factor_gt             0.0702
_refine_ls_restrained_S_all        1.015
_refine_ls_shift/su_max            0.000
_refine_ls_shift/su_mean           0.000
_refine_ls_structure_factor_coef   Fsqd
_refine_ls_weighting_details      
 'w=1/[\s^2^(Fo^2^)+(0.0905P)^2^+0.0379P] where P=(Fo^2^+2Fc^2^)/3'
_refine_ls_weighting_scheme        calc
_refine_ls_wR_factor_gt            0.1634
_refine_ls_wR_factor_ref           0.2335
_refine_special_details            ?
_olex2_refinement_description
;
1. Fixed Uiso
 At 1.2 times of:
  All C(H) groups, All C(H,H) groups
2.a Secondary CH2 refined with riding coordinates:
 C6(H6A,H6B), C2(H2A,H2B), C3(H3A,H3B)
2.b Aromatic/amide H refined with riding coordinates:
 C10(H10), C14(H14), C12(H12), C11(H11), C13(H13)
;
_atom_sites_solution_hydrogens     mixed
_atom_sites_solution_primary       dual
_atom_sites_solution_secondary     ?
loop_
  _atom_site_label
  _atom_site_type_symbol
  _atom_site_fract_x
  _atom_site_fract_y
  _atom_site_fract_z
  _atom_site_U_iso_or_equiv
  _atom_site_adp_type
  _atom_site_occupancy
  _atom_site_site_symmetry_order
  _atom_site_calc_flag
  _atom_site_refinement_flags_posn
  _atom_site_refinement_flags_adp
  _atom_site_refinement_flags_occupancy
  _atom_site_disorder_assembly
  _atom_site_disorder_group
 O4 O 0.5882(3) 0.4387(3) 0.14580(15) 0.0489(6) Uani 1 1 d . . . . .
 O2 O 0.3219(4) 0.9655(3) 0.08510(17) 0.0553(6) Uani 1 1 d . . . . .
 O1 O -0.0163(4) 0.7884(3) 0.05080(17) 0.0571(6) Uani 1 1 d . . . . .
 F1 F 0.0274(4) 0.8273(3) 0.30905(16) 0.0873(8) Uani 1 1 d . . . . .
 F2 F 0.2115(4) 1.0234(3) 0.28361(17) 0.0836(7) Uani 1 1 d . . . . .
 N1 N 0.2122(4) 0.5655(3) 0.15718(17) 0.0416(6) Uani 1 1 d . . . . .
 F3 F -0.0785(4) 1.0497(3) 0.19433(19) 0.0929(9) Uani 1 1 d . . . . .
 C8 C 0.1301(4) 0.7317(4) 0.1162(2) 0.0407(6) Uani 1 1 d . . . . .
 C5 C 0.4264(4) 0.5326(4) 0.2100(2) 0.0393(6) Uani 1 1 d . . . . .
 C7 C 0.2560(5) 0.8425(4) 0.1604(2) 0.0427(7) Uani 1 1 d . . . . .
 C9 C 0.4248(5) 0.4239(4) 0.3141(2) 0.0455(7) Uani 1 1 d . . . . .
 C6 C 0.4689(5) 0.7130(4) 0.2079(2) 0.0481(7) Uani 1 1 d . . . . .
 H6A H 0.488659 0.730585 0.275748 0.058 Uiso 1 1 calc R U . . .
 H6B H 0.605146 0.724684 0.167988 0.058 Uiso 1 1 calc R U . . .
 C2 C 0.2222(5) 0.4207(4) 0.1048(2) 0.0529(8) Uani 1 1 d . . . . .
 H2A H 0.182704 0.460793 0.034258 0.063 Uiso 1 1 calc R U . . .
 H2B H 0.120571 0.351033 0.136566 0.063 Uiso 1 1 calc R U . . .
 C1 C 0.1040(6) 0.9364(4) 0.2368(3) 0.0579(8) Uani 1 1 d . . . . .
 C3 C 0.4722(5) 0.3215(4) 0.1163(3) 0.0558(8) Uani 1 1 d . . . . .
 H3A H 0.487759 0.219061 0.167554 0.067 Uiso 1 1 calc R U . . .
 H3B H 0.535199 0.287296 0.053035 0.067 Uiso 1 1 calc R U . . .
 C10 C 0.2248(6) 0.4182(5) 0.3686(3) 0.0601(9) Uani 1 1 d . . . . .
 H10 H 0.084932 0.482242 0.340789 0.072 Uiso 1 1 calc R U . . .
 C14 C 0.6279(6) 0.3262(5) 0.3577(3) 0.0682(10) Uani 1 1 d . . . . .
 H14 H 0.765711 0.327219 0.322789 0.082 Uiso 1 1 calc R U . . .
 C12 C 0.4277(9) 0.2239(6) 0.5052(3) 0.0805(12) Uani 1 1 d . . . . .
 H12 H 0.427688 0.157249 0.569060 0.097 Uiso 1 1 calc R U . . .
 C11 C 0.2278(7) 0.3202(6) 0.4627(3) 0.0753(12) Uani 1 1 d . . . . .
 H11 H 0.090316 0.319860 0.497904 0.090 Uiso 1 1 calc R U . . .
 C13 C 0.6303(8) 0.2254(6) 0.4533(3) 0.0899(14) Uani 1 1 d . . . . .
 H13 H 0.768740 0.159625 0.481752 0.108 Uiso 1 1 calc R U . . .
 H2 H 0.204(8) 1.022(6) 0.036(3) 0.102(15) Uiso 1 1 d . . . . .

loop_
  _atom_site_aniso_label
  _atom_site_aniso_U_11
  _atom_site_aniso_U_22
  _atom_site_aniso_U_33
  _atom_site_aniso_U_23
  _atom_site_aniso_U_13
  _atom_site_aniso_U_12
 O4 0.0457(11) 0.0454(12) 0.0549(12) -0.0110(10) 0.0043(8) -0.0095(9)
 O2 0.0670(13) 0.0413(13) 0.0586(13) 0.0084(10) -0.0065(11) -0.0256(11)
 O1 0.0613(13) 0.0430(13) 0.0634(14) 0.0040(10) -0.0210(10) -0.0112(11)
 F1 0.1165(18) 0.0706(16) 0.0738(14) -0.0158(12) 0.0372(13) -0.0285(14)
 F2 0.1189(18) 0.0596(15) 0.0798(15) -0.0306(12) -0.0057(12) -0.0217(13)
 N1 0.0400(12) 0.0337(13) 0.0497(13) -0.0029(10) -0.0086(9) -0.0080(10)
 F3 0.0825(15) 0.0713(17) 0.1027(18) -0.0234(14) -0.0098(12) 0.0280(13)
 C8 0.0373(13) 0.0344(15) 0.0463(15) 0.0007(12) -0.0066(11) -0.0055(11)
 C5 0.0383(13) 0.0339(14) 0.0454(15) -0.0053(11) -0.0045(11) -0.0086(11)
 C7 0.0496(15) 0.0301(14) 0.0477(16) 0.0019(12) -0.0038(11) -0.0142(12)
 C9 0.0518(16) 0.0354(16) 0.0486(16) -0.0029(12) -0.0082(12) -0.0109(13)
 C6 0.0498(15) 0.0389(16) 0.0575(18) -0.0038(13) -0.0132(12) -0.0151(13)
 C2 0.0632(19) 0.0356(16) 0.065(2) -0.0100(14) -0.0136(14) -0.0167(14)
 C1 0.071(2) 0.0385(18) 0.061(2) -0.0061(15) -0.0015(16) -0.0085(16)
 C3 0.0651(19) 0.0433(18) 0.0608(19) -0.0177(15) -0.0020(15) -0.0103(16)
 C10 0.0617(19) 0.050(2) 0.061(2) 0.0028(16) 0.0083(15) -0.0118(16)
 C14 0.0604(19) 0.069(3) 0.065(2) 0.0099(18) -0.0185(15) -0.0104(19)
 C12 0.129(4) 0.064(3) 0.048(2) 0.0101(18) -0.016(2) -0.035(3)
 C11 0.097(3) 0.063(2) 0.058(2) 0.0042(19) 0.017(2) -0.022(2)
 C13 0.106(3) 0.077(3) 0.077(3) 0.018(2) -0.050(2) -0.016(3)

_geom_special_details
;
 All esds (except the esd in the dihedral angle between two l.s. planes)
 are estimated using the full covariance matrix.  The cell esds are taken
 into account individually in the estimation of esds in distances, angles
 and torsion angles; correlations between esds in cell parameters are only
 used when they are defined by crystal symmetry.  An approximate (isotropic)
 treatment of cell esds is used for estimating esds involving l.s. planes.
;
loop_
  _geom_bond_atom_site_label_1
  _geom_bond_atom_site_label_2
  _geom_bond_distance
  _geom_bond_site_symmetry_2
  _geom_bond_publ_flag
 O4 C5 1.428(3) . ?
 O4 C3 1.441(4) . ?
 O2 C7 1.406(3) . ?
 O2 H2 0.96(5) . ?
 O1 C8 1.227(3) . ?
 F1 C1 1.339(4) . ?
 F2 C1 1.332(4) . ?
 N1 C8 1.342(4) . ?
 N1 C5 1.453(3) . ?
 N1 C2 1.469(4) . ?
 F3 C1 1.323(4) . ?
 C8 C7 1.534(4) . ?
 C5 C9 1.518(4) . ?
 C5 C6 1.551(4) . ?
 C7 C6 1.526(4) . ?
 C7 C1 1.516(4) . ?
 C9 C10 1.379(4) . ?
 C9 C14 1.376(4) . ?
 C6 H6A 0.9700 . ?
 C6 H6B 0.9700 . ?
 C2 H2A 0.9700 . ?
 C2 H2B 0.9700 . ?
 C2 C3 1.518(4) . ?
 C3 H3A 0.9700 . ?
 C3 H3B 0.9700 . ?
 C10 H10 0.9300 . ?
 C10 C11 1.368(5) . ?
 C14 H14 0.9300 . ?
 C14 C13 1.395(5) . ?
 C12 H12 0.9300 . ?
 C12 C11 1.353(6) . ?
 C12 C13 1.371(6) . ?
 C11 H11 0.9300 . ?
 C13 H13 0.9300 . ?

loop_
  _geom_angle_atom_site_label_1
  _geom_angle_atom_site_label_2
  _geom_angle_atom_site_label_3
  _geom_angle
  _geom_angle_site_symmetry_1
  _geom_angle_site_symmetry_3
  _geom_angle_publ_flag
 C5 O4 C3 104.4(2) . . ?
 C7 O2 H2 113(3) . . ?
 C8 N1 C5 113.3(2) . . ?
 C8 N1 C2 124.0(2) . . ?
 C5 N1 C2 108.6(2) . . ?
 O1 C8 N1 126.3(3) . . ?
 O1 C8 C7 124.3(3) . . ?
 N1 C8 C7 109.3(2) . . ?
 O4 C5 N1 102.3(2) . . ?
 O4 C5 C9 109.9(2) . . ?
 O4 C5 C6 110.5(2) . . ?
 N1 C5 C9 112.9(2) . . ?
 N1 C5 C6 105.2(2) . . ?
 C9 C5 C6 115.3(2) . . ?
 O2 C7 C8 111.8(2) . . ?
 O2 C7 C6 109.8(2) . . ?
 O2 C7 C1 108.3(2) . . ?
 C6 C7 C8 103.9(2) . . ?
 C1 C7 C8 110.5(2) . . ?
 C1 C7 C6 112.5(2) . . ?
 C10 C9 C5 122.4(3) . . ?
 C14 C9 C5 120.1(3) . . ?
 C14 C9 C10 117.5(3) . . ?
 C5 C6 H6A 110.6 . . ?
 C5 C6 H6B 110.6 . . ?
 C7 C6 C5 105.7(2) . . ?
 C7 C6 H6A 110.6 . . ?
 C7 C6 H6B 110.6 . . ?
 H6A C6 H6B 108.7 . . ?
 N1 C2 H2A 111.3 . . ?
 N1 C2 H2B 111.3 . . ?
 N1 C2 C3 102.2(2) . . ?
 H2A C2 H2B 109.2 . . ?
 C3 C2 H2A 111.3 . . ?
 C3 C2 H2B 111.3 . . ?
 F1 C1 C7 111.6(3) . . ?
 F2 C1 F1 106.4(3) . . ?
 F2 C1 C7 113.0(3) . . ?
 F3 C1 F1 107.1(3) . . ?
 F3 C1 F2 106.5(3) . . ?
 F3 C1 C7 111.8(3) . . ?
 O4 C3 C2 105.4(2) . . ?
 O4 C3 H3A 110.7 . . ?
 O4 C3 H3B 110.7 . . ?
 C2 C3 H3A 110.7 . . ?
 C2 C3 H3B 110.7 . . ?
 H3A C3 H3B 108.8 . . ?
 C9 C10 H10 119.3 . . ?
 C11 C10 C9 121.4(3) . . ?
 C11 C10 H10 119.3 . . ?
 C9 C14 H14 119.5 . . ?
 C9 C14 C13 121.0(4) . . ?
 C13 C14 H14 119.5 . . ?
 C11 C12 H12 120.3 . . ?
 C11 C12 C13 119.4(3) . . ?
 C13 C12 H12 120.3 . . ?
 C10 C11 H11 119.5 . . ?
 C12 C11 C10 121.0(4) . . ?
 C12 C11 H11 119.5 . . ?
 C14 C13 H13 120.1 . . ?
 C12 C13 C14 119.7(4) . . ?
 C12 C13 H13 120.1 . . ?

loop_
  _geom_torsion_atom_site_label_1
  _geom_torsion_atom_site_label_2
  _geom_torsion_atom_site_label_3
  _geom_torsion_atom_site_label_4
  _geom_torsion
  _geom_torsion_site_symmetry_1
  _geom_torsion_site_symmetry_2
  _geom_torsion_site_symmetry_3
  _geom_torsion_site_symmetry_4
  _geom_torsion_publ_flag
 O4 C5 C9 C10 -138.8(3) . . . . ?
 O4 C5 C9 C14 41.2(4) . . . . ?
 O4 C5 C6 C7 114.9(2) . . . . ?
 O2 C7 C6 C5 -132.3(2) . . . . ?
 O2 C7 C1 F1 177.7(3) . . . . ?
 O2 C7 C1 F2 -62.4(3) . . . . ?
 O2 C7 C1 F3 57.7(4) . . . . ?
 O1 C8 C7 O2 -42.6(4) . . . . ?
 O1 C8 C7 C6 -161.0(3) . . . . ?
 O1 C8 C7 C1 78.1(3) . . . . ?
 N1 C8 C7 O2 134.9(2) . . . . ?
 N1 C8 C7 C6 16.5(3) . . . . ?
 N1 C8 C7 C1 -104.3(3) . . . . ?
 N1 C5 C9 C10 -25.3(4) . . . . ?
 N1 C5 C9 C14 154.7(3) . . . . ?
 N1 C5 C6 C7 5.2(3) . . . . ?
 N1 C2 C3 O4 -15.7(3) . . . . ?
 C8 N1 C5 O4 -109.9(3) . . . . ?
 C8 N1 C5 C9 132.1(3) . . . . ?
 C8 N1 C5 C6 5.6(3) . . . . ?
 C8 N1 C2 C3 127.0(3) . . . . ?
 C8 C7 C6 C5 -12.5(3) . . . . ?
 C8 C7 C1 F1 54.9(4) . . . . ?
 C8 C7 C1 F2 174.8(3) . . . . ?
 C8 C7 C1 F3 -65.1(3) . . . . ?
 C5 O4 C3 C2 36.3(3) . . . . ?
 C5 N1 C8 O1 163.3(3) . . . . ?
 C5 N1 C8 C7 -14.2(3) . . . . ?
 C5 N1 C2 C3 -9.9(3) . . . . ?
 C5 C9 C10 C11 -179.5(3) . . . . ?
 C5 C9 C14 C13 179.9(3) . . . . ?
 C9 C5 C6 C7 -119.8(2) . . . . ?
 C9 C10 C11 C12 -0.7(6) . . . . ?
 C9 C14 C13 C12 -0.2(7) . . . . ?
 C6 C5 C9 C10 95.6(4) . . . . ?
 C6 C5 C9 C14 -84.4(4) . . . . ?
 C6 C7 C1 F1 -60.7(4) . . . . ?
 C6 C7 C1 F2 59.2(4) . . . . ?
 C6 C7 C1 F3 179.3(3) . . . . ?
 C2 N1 C8 O1 28.1(4) . . . . ?
 C2 N1 C8 C7 -149.4(3) . . . . ?
 C2 N1 C5 O4 32.1(3) . . . . ?
 C2 N1 C5 C9 -85.9(3) . . . . ?
 C2 N1 C5 C6 147.6(2) . . . . ?
 C1 C7 C6 C5 107.0(3) . . . . ?
 C3 O4 C5 N1 -41.8(3) . . . . ?
 C3 O4 C5 C9 78.4(3) . . . . ?
 C3 O4 C5 C6 -153.3(2) . . . . ?
 C10 C9 C14 C13 -0.1(6) . . . . ?
 C14 C9 C10 C11 0.5(5) . . . . ?
 C11 C12 C13 C14 0.1(7) . . . . ?
 C13 C12 C11 C10 0.4(7) . . . . ?

loop_
  _diffrn_refln_index_h
  _diffrn_refln_index_k
  _diffrn_refln_index_l
  _diffrn_refln_intensity_net
  _diffrn_refln_intensity_u
 0 0 3 3441.68 51.91
 0 0 -3 3614.24 54.66
 0 0 -3 3615.42 53.59
 0 0 3 3576.58 42.69
 0 0 -4 636.8 26.28
 0 0 4 587.56 25.33
 0 0 4 627.48 20.73
 0 0 -4 647.01 25.83
 0 0 5 1821.47 50.19
 0 0 5 1861.85 38.73
 0 0 5 1853.49 38.2
 0 0 6 662.26 24.96
 0 0 6 636.17 24.02
 0 0 6 677.55 33.24
 0 0 7 25.93 4.82
 0 0 7 34.21 8.85
 0 0 8 102.08 10.15
 0 0 8 124.91 16.34
 0 0 9 -0.35 1.2
 0 0 9 1.58 1.46
 0 0 10 8.97 2.91
 0 0 10 8.99 5.73
 0 0 11 11.44 4.16
 0 0 11 7.19 4.67
 0 0 12 62.61 13.75
 0 0 12 74.35 11.58
 0 0 13 13.66 6.04
 0 0 14 -1.76 3.8
 0 0 15 17.23 8.78
 0 0 16 -4.23 6.13
 0 0 17 -1.54 2.81
 0 -1 17 15.97 10.08
 0 -1 16 0.47 4.28
 0 -1 15 8.36 6.34
 0 -1 14 3.49 3.01
 0 -1 13 -0.3 3.84
 0 -1 12 198.85 27.46
 0 -1 12 162.17 15.88
 0 -1 11 44.07 11.21
 0 -1 11 39.66 7.07
 0 -1 10 8.34 2.76
 0 -1 10 9.89 5.43
 0 -1 9 -0.28 4
 0 -1 9 4.61 2.96
 0 -1 8 854.85 45.22
 0 -1 7 111.94 14.4
 0 -1 6 1883.11 58.04
 0 -1 6 1890.47 58.95
 0 -1 5 309.37 21.32
 0 -1 4 1094.84 37.47
 0 -1 3 1805.71 42.4
 0 1 -3 1815.36 41.82
 0 -1 2 2688.88 44.09
 0 1 -2 2922.88 48.22
 0 -1 -2 914.11 24.2
 0 -1 -3 164.15 12.98
 0 1 3 102.48 8.5
 0 1 3 129.51 11.44
 0 -1 -3 140.19 12.5
 0 -1 -3 131.22 8.87
 0 -1 -4 4925.01 52.36
 0 1 4 5093.64 57.61
 0 -1 -4 4961.28 62.87
 0 1 4 5038.76 74.12
 0 -1 -4 5188.64 71.55
 0 1 5 -0.99 0.55
 0 1 5 -0.57 1.16
 0 -1 -5 -2.57 2.48
 0 1 6 145.35 12.39
 0 1 6 160.47 11.1
 0 1 6 146.27 14.53
 0 1 7 4.59 2.27
 0 1 7 9.98 5.76
 0 1 7 8 4.08
 0 1 8 27.86 7.13
 0 1 9 512.07 34.4
 0 1 10 195.31 22.31
 0 1 11 26.8 9.04
 0 1 12 10.76 5.75
 0 1 13 -4.08 5.49
 0 1 14 1.56 2.96
 0 1 15 3.57 3.54
 0 1 16 5.04 4.27
 0 1 17 9.14 8.43
 0 1 18 7.81 12.24
 0 -2 17 29.51 14.94
 0 -2 16 6.29 5.7
 0 -2 15 7.57 5.89
 0 -2 14 1.86 2.61
 0 -2 13 24.7 9.56
 0 -2 12 120.94 21.66
 0 -2 11 51.79 9.89
 0 -2 11 51.16 13.27
 0 -2 10 1.89 2
 0 -2 9 118.94 19.15
 0 2 -9 124.85 8.83
 0 -2 8 9.91 4.42
 0 -2 8 15.96 6.24
 0 -2 7 9.1 5.09
 0 -2 6 36.37 7.4
 0 -2 5 581.4 31.94
 0 -2 4 2484.61 61.66
 0 -2 3 1255.56 40.07
 0 -2 2 2684.32 54.18
 0 2 -2 2689.83 53.84
 0 2 -1 263.85 14.93
 0 -2 1 288.3 16.3
 0 -2 0 200.29 17.47
 0 2 0 110.14 11.38
 0 2 1 7781.44 86.21
 0 -2 -1 8177.42 88.44
 0 -2 -2 6053.02 76.7
 0 -2 -2 6276.94 79.65
 0 2 2 6044.58 78.79
 0 2 3 1994.16 46.7
 0 -2 -3 2084.7 45.62
 0 -2 -4 1162.28 33.47
 0 2 4 1290.24 34.14
 0 2 4 1229.06 40.35
 0 2 5 4.74 1.87
 0 -2 -5 0.14 1.54
 0 2 5 -0.54 3.15
 0 2 6 870.13 28.48
 0 2 6 818.66 36.74
 0 -2 -6 812.75 27.26
 0 2 7 36.8 5.74
 0 2 7 36.08 8.25
 0 -2 -7 31.42 5.57
 0 2 8 53.48 10.75
 0 -2 -8 47.89 7.27
 0 2 9 2.39 2.24
 0 2 10 66.4 13.28
 0 2 11 20.99 7.69
 0 2 12 2.56 0.54
 0 2 13 92.32 18.69
 0 2 14 105.91 19.85
 0 2 15 10.97 5.34
 0 2 16 53.09 14.62
 0 2 17 1.87 2.88
 0 2 18 -2.37 3.55
 0 -3 16 13.4 9.65
 0 -3 15 0.71 4.64
 0 -3 14 51.5 16.38
 0 -3 13 31.66 11.29
 0 -3 12 -3.16 4.02
 0 -3 11 466.37 43.05
 0 -3 10 82.6 16.97
 0 -3 9 64.1 14.52
 0 -3 8 171.09 22.08
 0 -3 7 54.83 11.64
 0 -3 6 323.9 28.08
 0 -3 5 452.22 30.68
 0 -3 4 320.9 24.56
 0 -3 3 22.33 6.76
 0 -3 2 2.98 2.61
 0 -3 1 1111.23 38.38
 0 -3 0 140.99 12.79
 0 -3 -1 1196.17 37.38
 0 3 2 206.19 17.33
 0 3 3 52.6 8.78
 0 -3 -3 41.2 7.28
 0 3 4 422.49 25.89
 0 -3 -4 406.81 23.8
 0 -3 -5 62.16 8.88
 0 3 5 65.76 10.31
 0 -3 -6 507.87 27.22
 0 3 6 488.8 31.13
 0 -3 -7 172.97 15.32
 0 3 7 173.3 19.36
 0 3 8 27.91 8.32
 0 -3 -8 28.75 6.01
 0 3 9 128.37 17.73
 0 -3 -9 112.81 12.73
 0 -3 -10 12.99 4.9
 0 3 10 13.44 5.99
 0 -3 -11 4.7 3.52
 0 3 11 11.28 6.42
 0 3 12 59.28 14.74
 0 3 13 2.87 1.46
 0 3 14 8.71 3.47
 0 3 15 28.83 11.84
 0 3 16 0.32 5.09
 0 3 17 20.52 13.67
 0 3 18 -9.04 10.85
 0 -4 15 2.77 6.21
 0 -4 14 8.14 7.47
 0 -4 13 32.5 11.79
 0 -4 12 20.04 8.96
 0 -4 11 3.45 0.76
 0 -4 10 -7.89 7.32
 0 -4 9 0.51 3.59
 0 -4 8 65.43 15.16
 0 -4 7 138.71 20.03
 0 -4 6 55.99 12.49
 0 -4 5 27.32 8.1
 0 -4 4 101.07 14.77
 0 -4 3 305.63 25.56
 0 -4 2 2.64 3.63
 0 -4 1 515.57 30.32
 0 -4 0 834.13 36.63
 0 -4 -1 11.02 5.2
 0 -4 -2 17.07 5.85
 0 -4 -3 9.29 5.51
 0 4 3 1.74 2.07
 0 4 4 572.06 34.03
 0 -4 -4 486.08 30.8
 0 -4 -5 20.49 6.14
 0 4 5 25.18 6.89
 0 4 6 166.84 19.2
 0 -4 -6 160.48 16.56
 0 -4 -7 1065.13 46.33
 0 4 7 1012.43 50.64
 0 4 8 214.62 23.69
 0 -4 -8 231 20.6
 0 -4 -9 2.69 1.59
 0 4 9 4.74 4.26
 0 -4 -10 185.53 18.38
 0 4 10 181.73 24.13
 0 -4 -11 7.8 4.26
 0 4 11 0.96 2.74
 0 4 12 43.24 12.2
 0 -4 -12 41.49 9.74
 0 4 13 5.31 1.75
 0 4 14 60.17 15.71
 0 4 15 0.47 4.81
 0 4 16 0.51 2.05
 0 4 17 -3.09 4.23
 0 -5 14 1.01 2.48
 0 -5 13 0.86 5.95
 0 -5 12 10.32 8.45
 0 -5 11 16.84 9.11
 0 -5 10 3.94 2.85
 0 -5 9 144.13 23.91
 0 -5 8 43.72 11.95
 0 -5 7 217.91 26.62
 0 -5 6 19.25 6.89
 0 -5 5 607.32 41.6
 0 -5 4 15.73 7.72
 0 -5 3 6.33 3.61
 0 -5 2 59.12 11.87
 0 -5 1 86.85 13.8
 0 -5 0 471.99 31.41
 0 -5 -1 28.19 8.12
 0 -5 -2 261.43 23.63
 0 -5 -3 649.59 36.78
 0 -5 -4 15.34 5.99
 0 5 4 20.91 7.46
 0 5 5 37.53 9.33
 0 -5 -5 30.84 8.72
 0 -5 -6 225.6 24.18
 0 5 6 259.99 26.42
 0 5 7 21.92 9.48
 0 -5 -7 9.74 4.56
 0 -5 -8 682.09 41.68
 0 5 8 550.71 40.76
 0 5 9 67.66 15.14
 0 -5 -9 74.51 13.42
 0 5 10 10.67 7.43
 0 -5 -10 12.3 5.78
 0 5 11 6.59 4.39
 0 -5 -11 5.66 4.11
 0 5 12 17.96 9.05
 0 5 13 22.98 10.61
 0 5 14 3.21 5.34
 0 5 15 15.5 9.58
 0 5 16 16.97 11.26
 0 5 17 -10.68 11.61
 0 -6 12 2.99 4.22
 0 -6 11 41.71 14.9
 0 -6 10 1.63 5.14
 0 -6 9 26.17 10.9
 0 -6 8 8.62 4.56
 0 -6 7 11.27 6.04
 0 -6 6 -0.78 3.69
 0 -6 5 30.61 9.29
 0 -6 4 179.26 23.11
 0 -6 3 70.29 14.5
 0 -6 2 -4.49 4.82
 0 -6 1 3.76 0.63
 0 -6 0 45.02 11.02
 0 -6 -1 184.94 21.24
 0 -6 -2 41.5 19.36
 0 -6 -3 734.04 49.77
 0 -6 -3 855.27 47.1
 0 -6 -4 673.53 43.6
 0 -6 -4 590.62 42.66
 0 -6 -5 -0.52 3.63
 0 6 5 2.48 2.03
 0 -6 -6 6.57 3.15
 0 6 6 3.96 2.82
 0 6 7 2.84 6.74
 0 -6 -7 -3.94 4.61
 0 6 8 51.3 14.86
 0 -6 -8 43.63 10.64
 0 6 9 30.59 11.33
 0 -6 -9 29.72 9.65
 0 -6 -10 20.97 7.8
 0 6 10 15.36 7.76
 0 6 11 7.01 5.45
 0 -6 -11 3.83 2.56
 0 6 12 62.46 15.39
 0 6 13 7.24 4.98
 0 6 14 4.77 4.25
 0 6 15 11.37 9.65
 0 6 16 -9.1 10.1
 0 -7 11 20.21 14.07
 0 -7 10 5.93 2.18
 0 -7 9 50.64 16.51
 0 -7 8 4.73 3.61
 0 -7 7 32.76 12.56
 0 -7 6 -1.44 2.53
 0 -7 5 27.14 9.68
 0 -7 4 236.1 28.91
 0 -7 3 4.23 3.66
 0 -7 2 136.93 22.13
 0 -7 1 10.6 6.42
 0 -7 0 158.31 21.55
 0 -7 -1 42.47 13.34
 0 -7 -2 102.22 16.34
 0 -7 -3 24.8 8.88
 0 -7 -3 48.24 16.55
 0 -7 -4 200.99 23.8
 0 -7 -4 159.59 23.65
 0 -7 -5 24.37 9.09
 0 -7 -5 42.7 19.19
 0 7 6 223.94 31.58
 0 -7 -6 201 26.84
 0 7 7 188.9 28.26
 0 -7 -7 189.9 26.16
 0 -7 -8 1.71 2.75
 0 7 8 0.82 6.63
 0 -7 -9 49.71 12.54
 0 7 9 38.31 12.01
 0 -7 -10 14.6 6.93
 0 7 10 5.72 5.75
 0 7 11 2.66 2.68
 0 -7 -11 14.62 7.46
 0 7 12 39.88 13.6
 0 7 13 22.03 10.63
 0 7 14 41.25 15.84
 0 7 15 -2.1 3.43
 0 -8 9 -6.15 6.17
 0 -8 8 1.56 4.21
 0 -8 7 -0.02 0.68
 0 -8 6 2.05 3.18
 0 -8 5 7.36 4.66
 0 -8 4 69.21 16.73
 0 -8 3 -2.31 2.46
 0 -8 2 -0.22 4.27
 0 -8 1 24.79 13.46
 0 -8 0 332.47 34.94
 0 -8 -1 12.91 12.65
 0 -8 -2 105.47 22.53
 0 -8 -2 133.67 23.51
 0 -8 -3 79.74 18.98
 0 -8 -3 94.88 19.6
 0 -8 -4 -1.03 2.87
 0 -8 -4 7.94 10.63
 0 -8 -5 28.52 12.25
 0 -8 -5 17.45 7.68
 0 -8 -6 67.64 16.33
 0 -8 -6 75.43 15.84
 0 -8 -7 0.41 2.65
 0 -8 -7 1.53 0.66
 0 8 8 -0.17 2.27
 0 -8 -8 6.62 6.5
 0 8 9 -1.1 4.46
 0 -8 -9 -1.6 1.61
 0 8 10 11.92 6.49
 0 -8 -10 7.76 5.11
 0 8 11 1.08 3.45
 0 8 12 0.39 7.4
 0 8 13 9.45 11.1
 0 8 14 -15.23 9.44
 0 -9 7 16.96 11.03
 0 -9 6 6.15 3.14
 0 -9 5 -7.38 6.26
 0 -9 4 -0.33 2.16
 0 -9 3 19.88 8.11
 0 -9 2 1.83 2.3
 0 -9 1 35.28 12.09
 0 -9 0 5.92 6.94
 0 -9 -1 7.36 6.67
 0 -9 -1 9.76 6.65
 0 -9 -2 67.76 18.76
 0 -9 -2 78.67 17.53
 0 -9 -3 34.02 12.83
 0 -9 -3 55.4 17.47
 0 -9 -4 1.1 1.88
 0 -9 -4 10.81 12.29
 0 -9 -5 61.21 15.29
 0 -9 -5 49.2 15.57
 0 -9 -6 -3.3 5.38
 0 -9 -6 0.32 2.64
 0 -9 -7 0.61 1.17
 0 -9 -7 -5.34 4.93
 0 -9 -8 12.71 8.16
 0 -9 -8 17.4 8.63
 0 -9 -9 9.36 6.46
 0 -9 -10 -11.17 7.41
 0 9 10 19.96 13.83
 0 9 11 5.94 7.62
 0 9 12 13.1 12.72
 0 -10 5 4.81 4.26
 0 -10 4 -27.28 12.53
 0 -10 3 5.55 6.64
 0 -10 2 6.56 7.56
 0 -10 1 35.52 14.57
 0 -10 0 16.55 9.31
 0 -10 0 11.62 8.95
 0 -10 -1 92.11 24.83
 0 -10 -1 133.17 26.14
 0 -10 -2 0 5.07
 0 -10 -2 13.29 12.1
 0 -10 -3 19.68 11.44
 0 -10 -3 29.73 10.82
 0 -10 -4 -7.01 7.91
 0 -10 -4 3.73 5.41
 0 -10 -5 12.34 9.83
 0 -10 -6 1.75 5.15
 0 -10 -7 -4 4.67
 0 -10 -8 -2.08 5.5
 0 -10 -9 -22.89 11.16
 1 -10 -10 -4.96 5.59
 1 -10 -9 6.29 11.05
 1 -10 -8 0.11 3.69
 1 -10 -7 -3.95 6.23
 1 -10 -6 5.58 8.52
 1 -10 -5 11.25 6.86
 1 -10 -4 -1.87 7.16
 1 -10 -3 0.21 8.71
 1 -10 -2 0.71 1.55
 1 -10 -1 -3.78 6.6
 1 -9 -10 21.18 12.72
 1 -9 -9 11.78 9.15
 1 -9 -8 6.53 8.33
 1 -9 -7 5.49 8.52
 1 -9 -6 0.22 5.83
 1 -9 -5 17.33 10.64
 1 -9 -4 18.85 10.2
 1 -9 -3 3.61 3.02
 1 -9 -2 4.55 1.74
 1 -9 -1 41.78 14.25
 1 -9 0 97.68 20.42
 1 -9 0 60.49 18.18
 1 -9 1 19.75 8.86
 1 -9 1 6.04 4.52
 1 -9 2 5.62 4.64
 1 -9 2 2.93 3.66
 1 -9 3 -2.54 3.72
 1 -9 3 12.61 6.98
 1 -9 4 41.26 13.34
 1 -9 4 29.06 14.61
 1 -9 5 26.25 10.99
 1 -9 5 18.83 13.89
 1 -9 6 -3.3 10.96
 1 -9 7 14.84 11.92
 -1 8 13 -30.09 13.25
 -1 8 12 6.67 5.57
 1 -8 -11 -0.41 2.06
 -1 8 11 -7.65 6.69
 1 -8 -10 11.12 7.57
 -1 8 10 -1.24 8.07
 1 -8 -9 -1.43 5.27
 -1 8 9 -19.38 10.02
 1 -8 -8 32.07 13.48
 1 -8 -7 15.61 8.71
 1 -8 -6 14.99 8.33
 1 -8 -5 48.95 14.94
 1 -8 -4 2.99 4.3
 1 -8 -4 8.05 5.12
 1 -8 -3 -0.59 2.51
 1 -8 -3 -1.96 5.03
 1 -8 -2 25.85 6.98
 1 -8 -2 20.76 9.85
 1 -8 -1 36.83 13.71
 1 -8 -1 47.76 13.32
 1 -8 0 -3.67 4.82
 1 -8 0 -0.18 3.02
 1 -8 1 0.94 4.26
 1 -8 1 -0.83 7.16
 1 -8 2 -2.47 5.89
 1 -8 2 6.13 6.04
 1 -8 3 71.56 16.61
 1 -8 4 13.95 7.97
 1 -8 5 3.72 3.02
 1 -8 6 6.46 6.6
 1 -8 7 9.09 5.44
 1 -8 8 -4.48 6.7
 1 -8 9 25.64 12.22
 -1 7 14 1.73 5.69
 -1 7 13 3.51 4.92
 1 -7 -12 8.62 5.92
 -1 7 12 1.82 0.4
 -1 7 11 -2.22 7.1
 1 -7 -11 27.58 10.39
 -1 7 10 13.62 9.32
 1 -7 -10 3.28 1.27
 -1 7 9 -2.31 4.49
 1 -7 -9 0.79 4.78
 -1 7 8 93.89 19.61
 1 -7 -8 102.78 20.56
 1 -7 -7 56.59 14.37
 -1 7 7 60.41 17.36
 1 -7 -7 70.54 14.5
 1 -7 -6 200.12 25.28
 1 -7 -6 165.41 25.32
 1 -7 -5 297.74 34.02
 1 -7 -5 381.55 31.75
 1 -7 -4 103.52 20.83
 1 -7 -4 71.99 17.28
 1 -7 -3 126.77 18.54
 1 -7 -3 94.25 19.67
 1 -7 -2 66.93 16.82
 1 -7 -2 94.26 15.34
 1 -7 -1 5.77 6.89
 1 -7 -1 2.63 5.83
 1 -7 0 235.47 27.08
 1 -7 0 186.68 29.5
 1 -7 1 450.08 40.93
 1 -7 1 330.33 40.53
 1 -7 2 57.76 12.96
 1 -7 3 32.74 9.92
 1 -7 4 -0.81 5.61
 1 -7 5 0.66 2.54
 1 -7 6 10.73 5.43
 1 -7 7 17.87 7.59
 1 -7 8 7.29 4.43
 1 -7 9 10.29 8.16
 -1 6 15 3.52 4.42
 -1 6 14 2.16 1.85
 -1 6 13 -11.68 7.34
 1 -6 -12 15.3 7.22
 -1 6 12 12.26 8.27
 -1 6 11 22.09 9.41
 1 -6 -11 12.33 5.88
 1 -6 -10 2.41 2.25
 -1 6 10 -2 5.5
 -1 6 9 110.43 19.83
 1 -6 -9 114.28 19.63
 -1 6 8 7.89 9.33
 1 -6 -8 6.99 5.36
 -1 6 7 513.72 42.77
 1 -6 -7 494.79 42
 1 -6 -6 324.66 32.18
 -1 6 6 346.46 35.56
 1 -6 -5 88.19 15.18
 1 -6 -5 77.42 16.2
 1 -6 -4 -1.86 5.61
 1 -6 -4 -0.04 3.49
 1 -6 -3 15.99 4.22
 1 -6 -3 13.55 5.09
 1 -6 -2 122.38 16.09
 1 -6 -2 114.34 19.77
 1 -6 -1 87.82 13.17
 1 -6 -1 71.5 15.87
 1 -6 0 8.28 4.72
 1 -6 0 6.57 3.03
 1 -6 1 11.38 4.34
 1 -6 2 22.24 7.03
 1 -6 3 72.66 14.45
 1 -6 4 67.33 13.7
 1 -6 5 332.71 33.87
 1 -6 6 38.11 11.41
 1 -6 7 -1.38 4.89
 1 -6 8 11.34 5.58
 1 -6 9 8.7 6.25
 1 -6 12 31.58 17.04
 -1 5 16 -4.54 5
 -1 5 15 2.33 5.26
 -1 5 14 10.96 4.68
 -1 5 13 14.37 10.11
 -1 5 12 69.81 16.8
 1 -5 -12 73.53 15.41
 1 -5 -11 47.18 11.7
 -1 5 11 47.09 12.54
 -1 5 10 0.61 4.46
 1 -5 -10 4.55 2.41
 1 -5 -9 13.49 6.26
 -1 5 9 10.87 7.72
 -1 5 8 75.57 15.57
 1 -5 -8 78.16 14.93
 -1 5 7 32.1 9.64
 1 -5 -7 33.57 10.72
 1 -5 -6 77.24 15.02
 -1 5 6 96.23 16.83
 -1 5 5 101.06 16.06
 1 -5 -5 99.02 16.94
 1 -5 -4 239.85 26.13
 1 -5 -4 238.81 21.85
 1 -5 -3 1049.36 42.08
 1 -5 -3 1077.98 55.76
 1 -5 -2 44.8 10.42
 1 -5 -2 46.43 11.45
 1 -5 -1 2.75 2.58
 1 -5 -1 3.1 2.37
 1 -5 0 0.92 2.28
 1 -5 0 1.6 2.83
 1 -5 1 12.61 5.03
 1 -5 2 42.96 9.75
 1 -5 3 163.64 20.11
 1 -5 4 91.1 14.78
 1 -5 5 132.59 19.53
 1 -5 6 93.2 16.46
 1 -5 7 4.27 2.01
 1 -5 8 109.47 19.92
 1 -5 9 96.19 19.78
 1 -5 12 7.84 9.63
 1 -5 13 48.18 19.22
 -1 4 17 -8.62 8.19
 -1 4 16 12 8.58
 -1 4 15 -1.02 5.16
 -1 4 14 13.49 7.89
 -1 4 13 5.44 3.37
 1 -4 -13 11.01 6.04
 1 -4 -12 44.04 10.96
 -1 4 12 46.87 13.37
 -1 4 11 3.33 0.82
 1 -4 -11 8.84 4.33
 -1 4 10 103.69 17.81
 1 -4 -10 79.87 13.73
 -1 4 9 8.97 4.85
 1 -4 -9 19.21 6.74
 1 -4 -8 155.5 19.01
 -1 4 8 143.7 19.74
 1 -4 -7 6.08 4.25
 -1 4 7 4.7 1.12
 1 -4 -6 105.39 16.22
 -1 4 6 109.12 15.54
 -1 4 5 94.33 13.9
 1 -4 -5 81.61 13.8
 1 -4 -4 43.12 10.16
 -1 4 4 47.75 9.86
 1 -4 -3 119.12 16.98
 1 -4 -3 124.63 12.34
 1 -4 -2 34.31 8.34
 1 -4 -2 36.98 7.15
 1 -4 -1 134.09 17.9
 1 -4 -1 134.85 13.78
 1 -4 0 30.92 9.71
 1 -4 0 21.68 5.71
 1 -4 1 528.22 30.06
 1 -4 2 26.83 7.18
 1 -4 3 27.92 7.44
 1 -4 4 86.09 13.93
 1 -4 5 10.47 4.25
 1 -4 6 82.73 14.55
 1 -4 7 2339.48 84.83
 1 -4 8 28.29 7.69
 1 -4 11 75.13 18.72
 1 -4 12 90.78 21.37
 1 -4 13 6.12 2.86
 1 -4 14 -3.7 4.62
 -1 3 17 0 1.81
 -1 3 16 -4.49 4.52
 -1 3 15 1.44 2.58
 -1 3 14 -1.67 4.58
 -1 3 13 14.9 6.85
 -1 3 12 122.23 18.7
 1 -3 -12 165.07 21.17
 -1 3 11 36.6 10.86
 1 -3 -11 46.21 10.79
 -1 3 10 33.11 9.52
 1 -3 -10 23.32 6.6
 1 -3 -9 131.65 16.54
 -1 3 9 131.46 18.88
 -1 3 8 158.57 19.15
 1 -3 -8 146.94 17.3
 1 -3 -7 61.23 11.3
 -1 3 7 54.12 11.16
 1 -3 -6 1352.03 50.98
 -1 3 6 1316.56 51.22
 -1 3 5 241.51 20.33
 1 -3 -5 262.8 23.36
 -1 3 4 209.64 18.68
 1 -3 -4 186.89 18.64
 1 -3 -3 101.74 13.58
 -1 3 3 107.76 13.07
 1 -3 -2 129.4 10.61
 1 -3 -2 133.38 15.15
 1 -3 -1 613.85 33.9
 1 -3 -1 588.88 22.67
 1 -3 0 209.48 14.56
 -1 3 0 195.11 15.06
 1 -3 0 215.76 20.51
 1 -3 1 846.19 38.97
 1 -3 2 101 12.13
 1 -3 3 84.21 11.28
 1 -3 4 -3.11 2.82
 1 -3 5 65.08 12.06
 1 -3 6 297.16 26.9
 1 -3 7 133.4 18.91
 1 -3 10 26.38 8.96
 1 -3 11 13.85 9.49
 1 -3 12 -0.68 3.43
 1 -3 13 44.21 14.84
 1 -3 14 14.48 6.91
 1 -3 15 0.66 1.95
 -1 2 17 -5.57 7.2
 -1 2 16 -1.52 2.61
 -1 2 15 -1.3 1.94
 -1 2 14 93.3 18.46
 -1 2 13 76.43 16.14
 -1 2 12 1.1 3.51
 -1 2 11 9.88 6.12
 1 -2 -10 32.29 5.96
 1 -2 -10 36.25 9.1
 -1 2 10 36.77 9.64
 -1 2 9 193.09 20.58
 1 -2 -9 179.22 14.93
 1 -2 -9 191.27 18.99
 -1 2 8 60.79 11.1
 1 -2 -8 67.04 10.44
 -1 2 7 -4.62 4.72
 1 -2 -7 -0.03 1.81
 1 -2 -6 210.68 17.78
 -1 2 6 208.11 18.34
 -1 2 5 3556.12 72.33
 1 -2 -5 3561.44 73.2
 1 -2 -4 2852.11 64.4
 -1 2 4 2781.24 60.23
 1 -2 -3 1325.08 43.9
 -1 2 3 1306.95 39.36
 1 -2 -2 2495.57 51.21
 1 -2 -2 2325.93 55.46
 -1 2 2 2341.21 50.37
 1 -2 -1 5.39 1.92
 1 -2 -1 7.3 3.01
 1 -2 -1 9.54 4.6
 -1 2 0 438.3 16.91
 1 -2 0 449.24 17.05
 1 -2 0 471.36 25.03
 1 -2 1 2033.46 41.32
 -1 2 -1 2077.09 41.2
 -1 2 -2 40.55 6.53
 1 -2 2 31.29 5.72
 1 -2 3 103.13 11.74
 1 -2 4 141.7 14.98
 1 -2 5 110.77 14.28
 1 -2 8 223.71 24.84
 1 -2 9 3.42 1.78
 1 -2 9 10.63 5.78
 1 -2 10 24.3 8.95
 1 -2 11 12.4 7.21
 1 -2 12 0.1 2.4
 1 -2 13 7.78 3.8
 1 -2 14 2.58 3.21
 1 -2 15 -3.73 7.66
 1 -2 16 -16.4 9.93
 -1 1 17 -6.37 4.96
 -1 1 16 -16.66 9.12
 -1 1 15 -2.24 3.76
 -1 1 14 2.44 5.91
 -1 1 13 1.12 0.92
 -1 1 13 -2.55 6.83
 -1 1 12 202.87 22.67
 -1 1 12 223.46 27.56
 -1 1 11 184.12 23.74
 -1 1 11 176.36 20.77
 1 -1 -10 155.33 8.72
 -1 1 10 139.08 19.61
 -1 1 10 141.2 17.86
 -1 1 9 26.15 7.41
 -1 1 9 16.34 3.42
 -1 1 9 27.04 6.78
 1 -1 -8 118.15 13.86
 -1 1 8 98.76 14.72
 -1 1 8 102.87 13.56
 1 -1 -7 52.72 8.36
 -1 1 7 46.53 8.58
 1 -1 -7 43.37 5.38
 -1 1 7 26.16 4.78
 -1 1 7 52.12 9.78
 1 -1 -6 549.98 21.76
 1 -1 -6 635.75 28.61
 -1 1 6 610.92 30.68
 -1 1 6 642.96 32.85
 1 -1 -5 78.27 8.57
 -1 1 5 77.02 11.89
 -1 1 5 66 8.27
 1 -1 -5 74.9 9.07
 1 -1 -4 8189.27 93.64
 -1 1 4 8164.4 99.44
 -1 1 4 8145.23 88.28
 -1 1 3 600.05 22.84
 1 -1 -3 608.76 22.65
 1 -1 -3 544.3 23.91
 -1 1 3 629.26 26.1
 -1 1 2 1004.16 30.71
 1 -1 -2 1033.93 30.86
 1 -1 -2 1060.09 30.47
 -1 1 2 1017.02 24.96
 1 -1 -2 1081.07 26.37
 -1 1 1 710.01 24.6
 1 -1 -1 649.83 21.49
 -1 1 1 668.95 19.38
 -1 1 1 632.55 22.15
 1 -1 -1 656.16 24.2
 1 -1 -1 670.95 19.98
 1 -1 0 2075.24 37.37
 1 -1 0 1979.94 41.39
 -1 1 0 2107.99 41.74
 1 -1 0 2069.45 25.11
 -1 1 0 2064.08 25.41
 1 -1 1 1535.88 29.05
 1 -1 1 1522.24 35.8
 -1 1 -1 1492.68 28.5
 1 -1 1 1484.54 28.53
 -1 1 -2 1166.94 30.66
 -1 1 -3 203.4 14.77
 1 -1 5 75.51 7.79
 1 -1 6 927.02 26.24
 1 -1 6 1060.58 44.94
 -1 1 -7 0.41 1.2
 1 -1 7 16.78 5.65
 1 -1 8 307.91 27.12
 1 -1 8 245.75 11.88
 1 -1 9 -0.27 1.45
 1 -1 9 4.89 4.59
 1 -1 10 33.27 4.75
 1 -1 10 36.08 10.78
 1 -1 11 2.51 4.28
 1 -1 12 15.03 6.69
 1 -1 13 0 4.78
 1 -1 14 0.67 4.61
 1 -1 15 24.95 9.6
 1 -1 16 22.9 8.16
 1 -1 17 -9.59 7.56
 -1 0 18 -4.81 6.6
 -1 0 17 -1.89 3.16
 -1 0 16 -12.54 7.67
 -1 0 15 0.96 3.31
 -1 0 14 0.2 4.75
 -1 0 14 -3.82 5.13
 -1 0 13 8.31 1.57
 -1 0 13 5.12 3
 -1 0 12 0.29 3.06
 -1 0 12 4.44 3.51
 -1 0 11 13.44 6.6
 -1 0 11 5.4 0.43
 -1 0 10 51.04 11.51
 -1 0 10 52.13 9.64
 -1 0 9 69.5 11.46
 -1 0 9 87.17 12.44
 -1 0 8 183.79 19.69
 -1 0 8 191.83 18.36
 -1 0 7 16.67 4.56
 -1 0 7 2.87 1.02
 -1 0 7 17.16 5.57
 1 0 -6 756.35 20.79
 -1 0 6 708.09 35.12
 -1 0 5 -2.66 3.27
 -1 0 5 -4.07 3.88
 -1 0 4 1483.29 29.47
 -1 0 4 1454.89 38.62
 1 0 -4 1614.61 40.83
 1 0 -4 1642.68 38.67
 -1 0 4 1499.23 38.33
 1 0 -4 1504.11 39.5
 -1 0 4 1447.18 36.21
 -1 0 4 1519.5 42.23
 -1 0 3 2536.65 49.94
 -1 0 3 2442.16 42.06
 1 0 -3 2509.34 47.35
 -1 0 3 2528.63 41.17
 -1 0 3 2507.1 38.52
 -1 0 3 2615.98 48.18
 1 0 -3 2553.61 42.34
 -1 0 3 2498.07 38.1
 1 0 -3 2652.02 42.75
 1 0 -2 541.49 15.52
 -1 0 2 512.11 14.84
 -1 0 2 539.56 16.58
 -1 0 2 531.4 17.06
 -1 0 2 528.5 13.74
 -1 0 2 550.05 19.99
 1 0 -2 536.58 16.2
 1 0 -2 532.78 19.02
 -1 0 1 8441.33 45.37
 -1 0 1 8467.89 66.21
 -1 0 1 8381.42 66.66
 -1 0 1 8557.75 74.19
 1 0 1 3027.37 40.04
 -1 0 -1 2948.25 39.59
 -1 0 -1 3099.73 39.65
 -1 0 -1 3040.92 39.43
 -1 0 -2 2197.14 33.99
 1 0 2 2259.01 36.84
 -1 0 -2 2161.34 33.84
 1 0 2 2150.2 31.46
 -1 0 -3 646.26 18.55
 -1 0 -3 612.67 18.74
 1 0 3 654.06 23.58
 -1 0 -4 48.44 4.88
 1 0 4 58.42 8.55
 1 0 5 16.94 4.05
 1 0 6 158.66 8.93
 1 0 6 186.91 17.87
 1 0 7 222.68 20.97
 -1 0 -7 188.83 9.16
 1 0 8 133.66 17.58
 1 0 9 23.45 6.99
 1 0 10 1.18 0.91
 1 0 11 15.43 7.05
 1 0 12 -4.66 3.62
 1 0 13 12.23 4.94
 1 0 14 178.58 26.08
 1 0 15 4.98 5.38
 1 0 16 5.6 4.19
 1 0 17 56.76 16.95
 -1 -1 17 5.74 8.34
 -1 -1 16 0.21 2.18
 -1 -1 15 44.37 14.27
 -1 -1 14 -6.98 7.07
 -1 -1 13 9.31 5.1
 -1 -1 13 19.37 5.45
 -1 -1 12 -0.43 3.77
 -1 -1 12 -0.08 0.51
 -1 -1 11 195.85 20.78
 -1 -1 11 184.22 24.87
 -1 -1 10 220.43 23.61
 -1 -1 10 157.67 21.65
 -1 -1 9 2.89 1.29
 -1 -1 9 -2.18 5.71
 -1 -1 8 64.04 12.06
 1 1 -7 46.4 4.86
 -1 -1 7 54.11 9.98
 -1 -1 7 61.62 10.43
 -1 -1 6 562.21 31.5
 1 1 -6 619 19.08
 -1 -1 6 635.97 33.21
 -1 -1 5 1142.1 43.63
 1 1 -5 1137.15 24.93
 -1 -1 4 447.15 23.06
 -1 -1 4 456.34 16.95
 -1 -1 3 4150.15 51.6
 -1 -1 3 4104.54 52.37
 1 1 -3 4216.43 63.42
 -1 -1 2 5567.83 66.43
 -1 -1 2 5623.54 57.31
 1 1 -2 5545.87 60
 1 1 -2 5647.97 65.65
 1 1 -1 10.51 3.62
 -1 -1 1 7.4 3.37
 -1 -1 1 4.83 1.45
 -1 -1 1 8.21 2.44
 -1 -1 0 8781.59 71.39
 -1 -1 0 8933.35 59.18
 -1 -1 -1 3833.33 46.1
 -1 -1 -1 3848.95 43.47
 1 1 1 3962.02 52.18
 1 1 1 3893.4 42.79
 -1 -1 -2 6137.5 59.8
 1 1 2 5763.45 58.62
 -1 -1 -2 6021.2 60.71
 1 1 2 5707.62 58.74
 -1 -1 -2 5860.43 55.94
 -1 -1 -3 688.5 20.11
 1 1 3 626.91 20
 -1 -1 -3 699.59 23.7
 -1 -1 -3 703.27 19.26
 1 1 3 674.15 23.8
 1 1 4 24.5 6.18
 -1 -1 -4 17.66 3.29
 -1 -1 -5 -3.93 1.5
 1 1 5 0.22 2.21
 -1 -1 -5 -2.46 1.45
 1 1 6 227.55 18.43
 1 1 6 188.53 10.03
 -1 -1 -6 196.62 11.42
 1 1 7 472.19 28.97
 1 1 7 456.52 15.27
 1 1 8 225.22 21.66
 1 1 8 156.89 9.03
 1 1 9 238.04 23.11
 1 1 9 160.26 9.98
 1 1 10 28.29 4.05
 1 1 10 102.24 16.74
 1 1 11 19.06 7.02
 1 1 12 37.92 11.05
 1 1 13 9.01 5.67
 1 1 14 5.34 2.82
 1 1 15 90.46 18.99
 1 1 16 10.47 3.79
 1 1 17 3.64 4.09
 -1 -2 17 5.34 4.27
 -1 -2 16 -3.49 5.72
 -1 -2 15 -2.17 5.44
 -1 -2 14 0.52 3.33
 -1 -2 13 1.59 4.79
 -1 -2 13 8 4.26
 -1 -2 12 34.63 12.4
 -1 -2 12 36.92 10.3
 -1 -2 11 28.98 9.54
 -1 -2 11 39.59 10.1
 -1 -2 10 20.81 7.93
 1 2 -9 24.5 4.08
 -1 -2 9 25.17 7.98
 -1 -2 9 29.23 9.28
 -1 -2 8 20.09 4.14
 -1 -2 8 37.15 9.03
 -1 -2 8 35.72 9.66
 1 2 -7 563.87 22.48
 -1 -2 7 533.36 35.02
 -1 -2 7 568.09 36.5
 -1 -2 6 60.65 10.57
 1 2 -6 63.66 7.09
 -1 -2 5 3.59 0.73
 1 2 -5 6.14 2
 -1 -2 4 820.1 35.87
 1 2 -4 892.72 29.89
 -1 -2 3 118.97 13.22
 -1 -2 2 28.79 6.13
 1 2 -1 29.98 5.67
 -1 -2 1 17.28 3.92
 -1 -2 0 1362.99 33.96
 -1 -2 0 1411.56 38.39
 1 2 1 5290.56 70.35
 -1 -2 -1 5397.95 67.62
 1 2 2 11.55 3.05
 -1 -2 -2 15.05 3.48
 -1 -2 -3 3440.64 59.81
 1 2 3 3332.33 61.58
 1 2 4 28.42 6.14
 -1 -2 -5 408.63 12.98
 1 2 5 429.28 24.43
 1 2 5 429.6 19.96
 1 2 6 100.67 8.61
 1 2 6 112.84 13.39
 -1 -2 -6 106.48 5.36
 1 2 7 71.57 11.35
 1 2 7 64.68 6.99
 1 2 8 15.31 3.5
 1 2 8 17.23 7.16
 -1 -2 -8 10.68 3
 1 2 9 78.28 14.11
 -1 -2 -9 33.7 5.35
 1 2 10 348.23 32.3
 1 2 10 128.71 8.58
 1 2 11 242.15 27.92
 1 2 12 8.56 5.4
 1 2 13 -0.15 3.47
 1 2 14 53.01 15.45
 1 2 15 67.93 17.8
 1 2 16 9.65 8.62
 1 2 17 3.72 1.26
 1 2 18 -5.69 4.33
 -1 -3 16 2.5 5.32
 -1 -3 15 -17.52 12.56
 -1 -3 14 10.41 9.46
 -1 -3 13 10.81 7.22
 -1 -3 12 231.23 30.64
 -1 -3 11 19.61 8.49
 -1 -3 11 17.36 7.69
 -1 -3 10 114.08 20.63
 -1 -3 10 103.11 18.5
 -1 -3 9 184.08 23.93
 1 3 -9 197.95 15.29
 -1 -3 9 170.23 23.84
 -1 -3 8 68.09 13.87
 1 3 -8 71.49 9.19
 1 3 -7 35.47 6.56
 -1 -3 7 33.71 8.76
 -1 -3 6 -0.13 5.85
 -1 -3 5 3776.96 90.75
 -1 -3 4 1307.06 50.98
 -1 -3 3 816.35 38.38
 -1 -3 2 0.76 3.11
 -1 -3 1 30.67 5.79
 -1 -3 0 121.13 13.04
 1 3 2 434.31 24.9
 1 3 3 9999 122.51
 1 3 4 10.68 3.99
 1 3 5 115.19 14.01
 -1 -3 -5 93.46 9.08
 -1 -3 -6 593.58 21.98
 1 3 6 726.1 38.06
 -1 -3 -7 75.09 7.3
 1 3 7 78.8 12.71
 -1 -3 -8 82.32 7.54
 1 3 8 108.99 16.45
 1 3 9 17.55 7.26
 1 3 9 13.25 3.68
 -1 -3 -9 9.81 2.69
 1 3 10 2.62 2.06
 1 3 10 1.39 2.86
 1 3 11 210.73 25.39
 1 3 11 195.44 14.26
 1 3 12 -2.69 4.46
 1 3 13 109.1 19.27
 1 3 14 128.58 22.08
 1 3 15 17.12 7.9
 1 3 16 5.74 4.32
 1 3 17 -2.19 3.36
 1 3 18 -9.57 7.36
 -1 -4 15 5.63 8.01
 -1 -4 14 6.59 9.11
 -1 -4 13 51.25 16.27
 -1 -4 12 10.54 5.63
 -1 -4 12 17.38 7.85
 -1 -4 11 0.32 3.36
 -1 -4 11 6.82 4.78
 -1 -4 10 11.85 6.54
 1 4 -9 39.41 8.38
 -1 -4 9 32.04 10.16
 -1 -4 8 143.83 21.21
 -1 -4 7 20.02 8.17
 -1 -4 6 478.92 35.99
 -1 -4 5 -6.3 6.07
 -1 -4 4 33.73 9.3
 -1 -4 3 746.93 40.98
 -1 -4 2 243.48 22.62
 -1 -4 1 2011.15 61.28
 -1 -4 0 35.96 8.35
 -1 -4 -1 295.45 23.61
 1 4 2 3.69 3.63
 1 4 3 2198.53 66.83
 1 4 4 1632.44 58.47
 1 4 5 93.7 13.65
 1 4 6 141.5 18.17
 -1 -4 -6 122.9 13.16
 1 4 7 1643.9 63.02
 -1 -4 -7 1355.73 40.68
 1 4 8 61.95 14.96
 -1 -4 -8 58.06 8.59
 1 4 9 742.48 46.53
 -1 -4 -9 685.41 28.97
 -1 -4 -10 77.73 9.19
 1 4 10 93.38 17.3
 1 4 11 0.9 2.48
 1 4 11 -1.83 2.12
 1 4 12 10.61 6.75
 1 4 13 13.95 8.06
 1 4 14 32.81 10.69
 1 4 15 20.42 8.53
 1 4 16 -0.06 5.61
 1 4 17 4.01 3.41
 -1 -5 14 -6.72 9.49
 -1 -5 13 -0.09 4.57
 -1 -5 12 -5.01 3.09
 -1 -5 12 3.75 3.51
 -1 -5 11 7 5.94
 -1 -5 10 45.1 13.73
 -1 -5 9 24.67 9.55
 -1 -5 8 94.12 18.39
 -1 -5 7 47.59 12.8
 -1 -5 6 -5.16 5.78
 -1 -5 5 12.75 6.96
 -1 -5 4 158.71 21.39
 -1 -5 3 266.2 26.96
 -1 -5 2 40.76 12.56
 -1 -5 1 1766.03 63.15
 -1 -5 0 453.74 33.06
 -1 -5 -1 6.01 5.65
 -1 -5 -2 3.03 3.91
 1 5 3 42.26 10.65
 1 5 4 440.78 33.66
 1 5 5 336.86 29.16
 1 5 6 148.39 20.11
 -1 -5 -6 134.19 16.16
 -1 -5 -7 38.62 8.19
 1 5 7 52.09 12.21
 -1 -5 -8 10.5 1.91
 1 5 8 16.81 9.11
 1 5 9 536.43 42.01
 -1 -5 -9 586.22 33.88
 -1 -5 -10 61.92 10.1
 1 5 10 58.55 14.9
 1 5 11 98 18.56
 1 5 12 218.07 29.7
 1 5 13 -7.75 6.71
 1 5 14 0.03 2.69
 1 5 15 0.83 5.45
 1 5 16 -9.48 7.13
 1 5 17 0 7.8
 -1 -6 13 87.21 22.95
 -1 -6 13 19.86 8.56
 -1 -6 12 11.61 10.79
 -1 -6 12 4.1 6.13
 -1 -6 11 5.46 4.04
 -1 -6 10 5.85 3.7
 -1 -6 9 1.07 3.8
 -1 -6 8 10.5 5.8
 -1 -6 7 2.9 3.1
 -1 -6 6 219.01 28.16
 -1 -6 5 217.09 32.53
 -1 -6 4 11.54 6.2
 -1 -6 3 131.56 19.97
 -1 -6 2 111.23 17.76
 -1 -6 1 190.84 23.28
 -1 -6 0 12.91 8.11
 -1 -6 -1 85.74 14.92
 -1 -6 -2 2.22 8.14
 -1 -6 -3 92.95 17.81
 1 6 4 91.19 17.17
 1 6 5 4.57 6.68
 -1 -6 -6 405.62 32.41
 1 6 6 462.41 39.24
 -1 -6 -7 23.42 7.33
 1 6 7 43.53 15.37
 -1 -6 -8 453.14 33.05
 1 6 8 504.66 42.91
 -1 -6 -9 -1.72 3.55
 1 6 9 1.45 5.86
 1 6 10 89.82 18.27
 -1 -6 -10 99.59 15.01
 1 6 11 5.48 5.81
 1 6 12 25.47 11.44
 1 6 13 29.01 11.3
 1 6 14 -9.36 6.64
 1 6 15 4.9 4.3
 1 6 16 -0.1 0.72
 -1 -7 11 26.75 13.01
 -1 -7 10 -3 4.17
 -1 -7 9 19.29 8.87
 -1 -7 8 8.4 5.31
 -1 -7 7 -0.01 4.46
 -1 -7 6 5.76 3.45
 -1 -7 5 18.33 7.04
 -1 -7 4 155.01 23.83
 -1 -7 3 0.96 2.66
 -1 -7 2 126.04 20.35
 -1 -7 1 98.55 17.81
 -1 -7 0 15.19 11.13
 -1 -7 -1 168.48 22.18
 -1 -7 -2 7.38 10.53
 -1 -7 -3 53.53 13.57
 -1 -7 -4 27.26 11.87
 -1 -7 -6 8.14 6.45
 1 7 6 3.29 5.18
 -1 -7 -7 56.63 12.89
 1 7 7 69.96 16.45
 -1 -7 -8 13.88 5.98
 1 7 8 22.36 10.53
 1 7 9 51.9 14.81
 -1 -7 -9 35.96 9.62
 -1 -7 -10 67.41 13.8
 1 7 10 60.65 17.14
 1 7 11 4.04 2.38
 1 7 12 6.33 5.13
 1 7 13 -1.48 2.24
 1 7 14 -6.42 7.41
 1 7 15 20.55 12.8
 -1 -8 9 0 1.85
 -1 -8 8 2.92 3.56
 -1 -8 7 -0.85 3.92
 -1 -8 6 39.84 13.36
 -1 -8 5 7.88 5.95
 -1 -8 4 44.32 14.68
 -1 -8 3 14.19 7.71
 -1 -8 2 50.37 13.97
 -1 -8 1 21.13 7.82
 -1 -8 0 9.54 8.62
 -1 -8 -1 92.44 17.7
 -1 -8 -2 4.73 13.03
 -1 -8 -3 114.57 22.87
 -1 -8 -4 119.9 24.14
 -1 -8 -5 48.05 17.01
 -1 -8 -5 31.85 10.76
 -1 -8 -6 -15.37 9.01
 -1 -8 -6 2.41 8.97
 1 8 7 10.62 6.72
 -1 -8 -7 13.87 7.39
 -1 -8 -8 -8.71 6.25
 1 8 8 9.44 7.05
 -1 -8 -9 2.09 0.74
 1 8 9 1.44 4.24
 1 8 10 4.89 5.99
 1 8 11 10.46 7.48
 1 8 12 -2.4 0.37
 1 8 13 20.18 10.94
 1 8 14 0 5.98
 -1 -9 7 7.03 7.54
 -1 -9 6 2.25 3.61
 -1 -9 5 7.94 7.12
 -1 -9 4 0.03 3.83
 -1 -9 3 3.45 4.87
 -1 -9 2 17.37 8.64
 -1 -9 1 56.61 15.72
 -1 -9 0 0.83 0.79
 -1 -9 -1 3.93 8.89
 -1 -9 -2 43.26 14.06
 -1 -9 -3 13.98 10.68
 -1 -9 -4 15.83 9.74
 -1 -9 -4 19.39 10.11
 -1 -9 -5 3.6 4.06
 -1 -9 -5 -2.56 6.08
 -1 -9 -6 17.35 14.75
 -1 -9 -6 11.46 8
 -1 -9 -7 85.71 20.44
 -1 -9 -7 56.39 15.36
 -1 -9 -8 15.12 11.44
 -1 -9 -8 23.24 10.83
 -1 -9 -9 19.7 9.05
 1 9 9 25.04 13.13
 1 9 10 -2.92 2.02
 1 9 11 -0.19 5.37
 1 9 12 2.76 4.04
 -1 -10 5 -6.25 6.19
 -1 -10 4 -3.5 6.75
 -1 -10 3 4.32 11.79
 -1 -10 2 -3.27 4.98
 -1 -10 1 15.14 10.21
 -1 -10 0 34.87 14.32
 -1 -10 -1 63.74 19.16
 -1 -10 -2 72.27 19.42
 -1 -10 -3 0.23 4.27
 -1 -10 -3 0.77 10.51
 -1 -10 -4 24.27 9.1
 -1 -10 -4 5.22 1.55
 -1 -10 -5 4.08 8.88
 -1 -10 -5 -4.6 6.27
 -1 -10 -6 13.51 9.89
 -1 -10 -6 6.2 6.91
 -1 -10 -7 9.97 6.76
 -1 -10 -7 -5.08 5.63
 -1 -10 -8 -3.38 4.69
 -1 -10 -8 -9.48 6.83
 -1 -10 -9 18.51 9.98
 -1 -10 -10 8.65 6.46
 -1 -11 1 12.19 10.58
 -1 -11 0 9.08 13.63
 -1 -11 -1 5.46 7.4
 -1 -11 -2 -7.98 10.83
 -1 -11 -2 -10.64 8.55
 -1 -11 -3 36.2 13.07
 -1 -11 -3 21 13.78
 -1 -11 -4 -14.54 9.41
 -1 -11 -4 14.7 13.78
 -1 -11 -5 19.78 11.28
 -1 -11 -5 -1.79 7.34
 -1 -11 -6 -10.97 8.02
 -1 -11 -6 -2.44 3.36
 -1 -11 -7 -13.74 9.05
 2 -9 -11 1.41 7.02
 2 -9 -10 -3.48 4.59
 2 -9 -9 -9.2 7.51
 2 -9 -8 -3.83 6.11
 2 -9 -7 3.44 5.41
 2 -9 -6 -1.1 6.08
 2 -9 -5 23.08 12.12
 2 -9 -4 4.66 7.79
 2 -9 -3 -5.33 7.3
 2 -9 -2 -3.89 5.93
 2 -9 -1 0.23 1.26
 2 -9 0 10.13 7.08
 2 -9 1 6.22 3.9
 2 -9 2 -4.13 5.38
 2 -9 3 2.3 3.56
 -2 8 13 -27.68 12.75
 2 -8 -12 4.62 5.27
 -2 8 12 24.23 14.64
 2 -8 -11 37.46 15.72
 2 -8 -10 2.45 4.09
 2 -8 -9 56.89 16.96
 2 -8 -8 -1.54 1.17
 2 -8 -7 4.41 4.52
 2 -8 -6 23.22 9.02
 2 -8 -5 -1.71 2.8
 2 -8 -4 10.88 7.26
 2 -8 -3 0.95 3.39
 2 -8 -2 7.28 5.94
 2 -8 -1 8.87 7.24
 2 -8 0 23.74 12.61
 2 -8 1 6.79 4.76
 2 -8 2 39.74 15.6
 2 -8 3 1.42 4.55
 2 -8 4 1.94 2.23
 2 -8 5 15.11 10.2
 2 -8 5 -3.7 4.83
 2 -8 6 0.36 2.63
 2 -8 6 -1.54 6.58
 2 -8 7 -17.74 10.36
 2 -8 8 8.38 11.67
 -2 7 15 -7.28 6.49
 -2 7 14 3.45 10.66
 -2 7 13 1.38 3.66
 2 -7 -12 0.45 2.67
 -2 7 12 -6.24 6.88
 2 -7 -11 2 4.09
 -2 7 11 -9.28 6.21
 2 -7 -10 -1.74 4.91
 -2 7 10 -9.72 6.71
 -2 7 9 18.45 10.45
 2 -7 -9 16.3 9.44
 2 -7 -8 8.7 4.38
 2 -7 -7 5.09 6.9
 2 -7 -6 16.45 8.92
 2 -7 -5 7.37 5.88
 2 -7 -4 -0.56 3.92
 2 -7 -3 5.86 5.44
 2 -7 -2 7.3 5.44
 2 -7 -1 2.97 3.91
 2 -7 0 16.5 5.21
 2 -7 0 10.88 7.85
 2 -7 1 16.92 6.47
 2 -7 1 13.43 6.5
 2 -7 2 1.92 2.53
 2 -7 2 3.24 2.69
 2 -7 3 14.54 6.91
 2 -7 3 9.94 7.19
 2 -7 4 -2.23 0.35
 2 -7 4 3.65 4.74
 2 -7 5 0.34 3.15
 2 -7 5 -2.95 4.8
 2 -7 6 2.62 0.57
 2 -7 6 7.98 9.1
 2 -7 7 -9.79 6.87
 2 -7 8 -0.97 3.02
 2 -7 9 17.65 9.85
 2 -7 10 1.03 2.67
 -2 6 16 -21.32 11.24
 -2 6 15 2.95 6.18
 -2 6 14 -6.89 6.2
 2 -6 -13 0.36 2.74
 -2 6 13 -3.2 3.92
 2 -6 -12 16.21 8.4
 -2 6 12 -10.15 6.72
 2 -6 -11 -1.49 4.32
 -2 6 11 9.44 8.72
 2 -6 -10 -2.52 2.47
 -2 6 10 -11.76 10.01
 2 -6 -9 9.88 6.32
 -2 6 9 8.55 5.84
 2 -6 -8 154.47 25.07
 -2 6 8 130.4 21.94
 -2 6 7 123.01 21.75
 2 -6 -7 146.23 26.17
 2 -6 -6 133.51 23.59
 2 -6 -5 148.62 24.35
 2 -6 -4 -2.68 3.13
 2 -6 -3 55.29 15.61
 2 -6 -3 63.18 9.88
 2 -6 -2 5.02 2.56
 2 -6 -2 -0.64 1.48
 2 -6 -1 0.2 3.04
 2 -6 -1 1.93 0.96
 2 -6 0 17.61 5.13
 2 -6 0 15.19 8.14
 2 -6 1 31.12 7.15
 2 -6 1 31.59 11.92
 2 -6 2 303.8 35.79
 2 -6 2 327.01 28.82
 2 -6 3 46.53 14.6
 2 -6 3 46.44 10.59
 2 -6 4 442.91 38.42
 2 -6 4 413.58 43.22
 2 -6 5 31.64 9.74
 2 -6 5 34.21 11.22
 2 -6 6 24.65 10.59
 2 -6 6 25.83 9.74
 2 -6 7 14.83 7.92
 2 -6 8 13.92 8.07
 2 -6 9 -6.27 6.3
 2 -6 10 -5.69 5.62
 -2 5 17 3.52 6.87
 -2 5 16 -9.36 6.98
 -2 5 15 1.56 1.95
 -2 5 14 -5.46 5.89
 2 -5 -13 -2.65 3.43
 -2 5 13 -14.71 9.85
 2 -5 -12 3.35 3.56
 -2 5 12 10.41 7.14
 -2 5 11 0.96 2.65
 2 -5 -11 5.57 5.22
 2 -5 -10 16.33 7.27
 -2 5 10 16.83 8.23
 2 -5 -9 -1.05 3.76
 -2 5 9 2.44 2.92
 2 -5 -8 23.06 8.91
 -2 5 8 21.69 7.75
 2 -5 -7 8.8 4.82
 -2 5 7 6.2 3.88
 -2 5 6 9.71 5.78
 2 -5 -6 10.71 6.49
 2 -5 -5 8.51 2.97
 2 -5 -5 8.73 5.12
 2 -5 -4 -1.81 2.85
 2 -5 -4 0.84 2.36
 2 -5 -3 53.48 8.5
 2 -5 -3 49.49 11.8
 2 -5 -2 313.8 21.01
 2 -5 -2 287.24 31.19
 2 -5 -1 0.28 1.89
 2 -5 -1 -0.17 2.69
 2 -5 0 77.37 16.91
 2 -5 0 85.92 11.78
 2 -5 1 6.2 1.61
 2 -5 1 8.12 4.97
 2 -5 2 124.46 20.97
 2 -5 2 131.8 17.31
 2 -5 3 94.18 14.79
 2 -5 3 79.68 17.18
 2 -5 4 125.18 22.51
 2 -5 4 136.79 19
 2 -5 5 71.48 14.77
 2 -5 5 65.3 15.89
 2 -5 6 13.18 7.92
 2 -5 6 20.53 7.59
 2 -5 11 28.4 12.64
 2 -5 12 1.72 3.77
 2 -5 13 33.92 13.08
 -2 4 17 3.47 7.23
 -2 4 16 12.28 10.33
 -2 4 15 0 2.31
 -2 4 14 -14.32 10.06
 2 -4 -14 1.08 3.2
 2 -4 -13 7.43 5.47
 -2 4 13 6.62 3.43
 2 -4 -12 -1.55 3.46
 -2 4 12 0.51 1.73
 2 -4 -11 26.77 9.5
 2 -4 -11 39 10.57
 -2 4 11 27.02 9.72
 2 -4 -10 8.49 5.26
 -2 4 10 8.68 4.13
 2 -4 -9 37.77 10.74
 -2 4 9 31.67 9.12
 2 -4 -8 73.89 15.37
 -2 4 8 72.85 15.18
 2 -4 -7 17.52 6.69
 -2 4 7 23.17 8.46
 2 -4 -6 140.45 20.38
 -2 4 6 127.72 17.71
 -2 4 5 33.2 8.11
 2 -4 -5 39.62 11.01
 2 -4 -4 143.64 10.95
 2 -4 -4 142.09 20.58
 2 -4 -3 -0.9 4.27
 2 -4 -3 1.35 2.35
 2 -4 -2 19.61 7.43
 2 -4 -2 27.48 4.96
 2 -4 -1 112.42 10.86
 2 -4 -1 108.76 17.09
 2 -4 0 0.29 2.2
 2 -4 0 0.64 3.06
 2 -4 1 17.23 4.2
 2 -4 1 15.31 5.99
 2 -4 2 166.04 17.32
 2 -4 2 168.15 21.96
 2 -4 3 225.33 21.61
 2 -4 3 228.6 26.6
 2 -4 4 152.33 18.75
 2 -4 4 161.29 22.36
 2 -4 5 23 7.13
 2 -4 5 22.15 8.43
 2 -4 9 170.57 21.34
 2 -4 10 -0.74 3.74
 2 -4 11 -0.17 2.17
 2 -4 12 51.95 15.85
 2 -4 13 0.04 2.39
 2 -4 14 -0.26 1.26
 -2 3 18 -0.59 1.83
 -2 3 17 9.3 11.43
 -2 3 16 6.02 9
 -2 3 15 0 0.84
 -2 3 14 7.17 7.07
 -2 3 13 45.27 12.69
 2 -3 -13 46.28 12.51
 -2 3 12 59.3 14.79
 2 -3 -12 77.92 16.58
 2 -3 -11 35.94 10.63
 -2 3 11 34.61 10.68
 2 -3 -11 37.32 8.99
 2 -3 -10 1.95 1.39
 2 -3 -10 5.07 2.67
 -2 3 10 -1.14 3.77
 -2 3 9 68.7 14.11
 2 -3 -9 70.79 13.73
 2 -3 -9 59.68 11.31
 -2 3 8 187.01 21.37
 2 -3 -8 186.12 21.73
 -2 3 7 240.88 22.52
 2 -3 -7 261.44 26.13
 2 -3 -6 11.1 5.8
 -2 3 6 12.98 4.87
 2 -3 -5 86.23 14.48
 -2 3 5 88.38 12.49
 2 -3 -4 361.62 30.22
 -2 3 4 343.85 24.33
 2 -3 -3 1188.04 23.92
 2 -3 -3 1282.64 56.74
 2 -3 -2 518.53 20.61
 2 -3 -2 356.72 28.71
 2 -3 -1 57.13 5.92
 2 -3 -1 54.1 10.48
 2 -3 0 153.84 11.43
 2 -3 0 148.8 18.07
 2 -3 1 1044.31 35.7
 2 -3 1 1037.12 49.21
 2 -3 2 973.43 38.25
 2 -3 2 1040.46 49.02
 2 -3 3 291.44 26.55
 2 -3 4 1149.31 53.99
 2 -3 5 2.53 1.08
 2 -3 8 579.11 34.55
 2 -3 9 37.21 8.08
 2 -3 9 34.9 10.96
 2 -3 10 1.15 3.87
 2 -3 11 26.26 10.75
 2 -3 12 25.37 10.31
 2 -3 13 0.67 6.22
 2 -3 14 23.11 10.23
 2 -3 15 0 5.3
 -2 2 18 -24.91 11.41
 -2 2 17 5.98 8.52
 -2 2 16 7.44 6.78
 -2 2 15 -18.19 10.98
 -2 2 14 1.16 3.31
 -2 2 13 4.36 4.53
 -2 2 12 27.13 9.16
 -2 2 11 20.08 7.57
 -2 2 11 25.31 8.11
 2 -2 -11 32.96 10.27
 -2 2 10 19.63 7.3
 -2 2 10 14.51 5.45
 2 -2 -10 24.88 7.9
 2 -2 -9 195.39 21.59
 -2 2 9 199.25 21.68
 -2 2 9 188.44 22.99
 2 -2 -9 189.98 17.22
 2 -2 -8 518.24 34.53
 -2 2 8 517.6 37.65
 2 -2 -8 518.28 29.04
 -2 2 8 545.79 35.01
 2 -2 -7 31.26 8.04
 -2 2 7 39.53 8.34
 -2 2 7 37.68 10.14
 2 -2 -7 34.67 7.19
 2 -2 -6 259.21 21.4
 2 -2 -6 239.12 22.06
 -2 2 6 260.45 24.46
 -2 2 6 255.5 20.59
 2 -2 -5 11.31 3.16
 -2 2 5 19.47 7.69
 2 -2 -5 15.83 5.05
 -2 2 5 15.22 3.54
 -2 2 4 497.61 30.76
 -2 2 4 549.85 27.37
 2 -2 -4 523.98 32.21
 -2 2 3 439.25 23.13
 -2 2 3 406.2 27.2
 2 -2 -3 416.23 28.84
 2 -2 -2 23.82 5.85
 2 -2 -1 318.54 24.57
 -2 2 0 2574.77 39.51
 2 -2 0 2808.94 68.91
 2 -2 1 18.85 5.32
 -2 2 -1 20.89 4.38
 2 -2 2 37.21 6.78
 2 -2 3 78.99 9.19
 2 -2 3 87.62 12.43
 2 -2 4 295.23 17.42
 2 -2 4 375.64 26.62
 2 -2 5 62.41 11.23
 2 -2 5 56.25 9.82
 2 -2 6 148.14 15.66
 2 -2 6 68 7.45
 2 -2 7 127.27 13.56
 2 -2 8 1063.9 56.47
 2 -2 8 1010.7 38.73
 2 -2 9 2.27 3.84
 2 -2 10 31.03 10.3
 2 -2 11 52.63 13.49
 2 -2 12 145.9 24.55
 2 -2 13 25.6 8.84
 2 -2 14 20.3 7.66
 2 -2 15 10.03 6.61
 2 -2 16 -40.03 15.54
 -2 1 18 -6.11 5.67
 -2 1 17 1.26 2.46
 -2 1 16 2.34 3.2
 -2 1 15 -12.72 9.9
 -2 1 15 22.18 8.64
 -2 1 14 -3.37 3.64
 -2 1 14 -8.4 7.68
 -2 1 13 -1.04 2.24
 -2 1 13 -5.26 5.11
 -2 1 12 34.56 10.52
 -2 1 12 34.3 10.84
 -2 1 11 355.82 32.59
 -2 1 11 299.92 29.73
 -2 1 10 5.28 3.17
 -2 1 10 13.54 5.82
 -2 1 9 87.11 14.83
 -2 1 9 79.13 12.92
 2 -1 -9 94.72 14.87
 -2 1 8 131.74 17.27
 -2 1 8 129.16 15.5
 2 -1 -8 140.97 18
 2 -1 -7 1.39 1.16
 -2 1 7 3.14 2.58
 2 -1 -6 57 9.94
 2 -1 -6 56.43 7.65
 -2 1 6 61.16 8.14
 -2 1 6 74.92 14.19
 2 -1 -5 3928.93 82.89
 2 -1 -5 3718.44 69.95
 -2 1 5 3796.31 80.55
 -2 1 5 3865.59 65.22
 -2 1 4 375.15 19.21
 2 -1 -4 338.86 23.27
 -2 1 4 329.55 24.35
 2 -1 -4 303.34 16.99
 2 -1 -4 305.23 19.93
 -2 1 3 913.88 26.55
 -2 1 3 870.66 35.73
 2 -1 -3 847.29 33.41
 2 -1 -3 911.02 38.3
 2 -1 -2 1351.21 42.84
 -2 1 2 1298.43 41.11
 -2 1 2 1315.62 30.64
 2 -1 -2 1414.56 46.41
 -2 1 1 123.49 12.6
 2 -1 -1 111.28 12.24
 2 -1 -1 101.16 11.18
 2 -1 0 5.13 2.22
 -2 1 0 10.48 4.55
 -2 1 -1 230.28 15.41
 -2 1 -1 245.62 12.84
 2 -1 1 244.6 17.92
 2 -1 1 226.93 17.7
 -2 1 -2 4848.65 68.23
 2 -1 2 4725.14 70.84
 2 -1 2 4990.64 78.99
 2 -1 2 4803.56 80.23
 2 -1 3 1103.21 37.69
 2 -1 3 995.46 36.14
 2 -1 4 946.29 34.68
 2 -1 4 1120.81 38.45
 2 -1 5 470.75 28.53
 2 -1 5 418.73 23.32
 2 -1 5 449.17 24.25
 2 -1 6 19.04 4.8
 2 -1 6 22.1 6.18
 2 -1 7 298.58 25.74
 2 -1 8 41.27 9.86
 2 -1 9 26.2 8.13
 2 -1 10 550.01 42.75
 2 -1 11 2.68 0.82
 2 -1 12 -1.68 4.1
 2 -1 13 51.96 14.73
 2 -1 14 8.84 4.88
 2 -1 15 13.95 4.88
 2 -1 16 0.19 3.8
 -2 0 18 -12.87 8.59
 -2 0 17 -0.94 2.32
 -2 0 16 0 1.74
 -2 0 15 -21.96 11.74
 -2 0 15 2.9 1.64
 -2 0 14 -4.25 6.28
 -2 0 14 3.48 2.25
 -2 0 13 22.85 8.12
 -2 0 13 22.16 8.02
 -2 0 12 40.22 9.98
 -2 0 12 38.75 10.99
 -2 0 11 431.72 33.51
 -2 0 11 403.38 33.88
 -2 0 10 113.48 16.94
 -2 0 10 113.1 16.27
 -2 0 9 939.16 49.53
 -2 0 9 852.32 42.72
 -2 0 8 7.07 2.26
 2 0 -8 13.4 3.18
 -2 0 8 5.1 2.73
 2 0 -7 253.14 17.07
 -2 0 7 294.66 26.49
 -2 0 7 229.74 19.99
 2 0 -6 310.77 24.42
 -2 0 6 283.99 19.64
 -2 0 5 55.93 7.31
 2 0 -5 59.33 9.88
 -2 0 5 58.9 7.63
 -2 0 5 82.1 13.9
 2 0 -4 342.7 17.64
 -2 0 4 341.68 16.63
 -2 0 4 364.67 17.14
 2 0 -4 354.28 23
 -2 0 4 396.56 26.63
 -2 0 3 478.21 15.94
 -2 0 3 522.26 28.78
 2 0 -3 454.88 25.08
 2 0 -3 265.96 13.27
 2 0 -3 294.02 14.25
 -2 0 3 490.43 17.41
 -2 0 2 725.97 18.65
 -2 0 2 763.67 32.73
 -2 0 2 701.86 15.96
 2 0 -2 710.37 15.75
 2 0 -2 694.82 29.8
 2 0 -1 869.06 31.83
 -2 0 1 910.85 32.94
 2 0 0 160.93 12.99
 -2 0 0 184.48 13.58
 -2 0 -1 97.66 9.55
 -2 0 -1 97.02 10.13
 2 0 1 89.9 9.62
 2 0 1 96.04 6.54
 2 0 2 -1.64 2.37
 2 0 2 -4.37 2.73
 -2 0 -2 -3.07 2.67
 -2 0 -2 -0.34 0.16
 2 0 3 211.23 13.33
 -2 0 -3 180.33 9.98
 2 0 3 200.71 13.24
 2 0 4 759.63 30.42
 2 0 4 765.85 25.49
 2 0 5 535.93 20.3
 2 0 5 580.22 29.53
 2 0 6 1069 44.39
 2 0 6 1018.23 28.04
 2 0 7 98.37 9.98
 2 0 7 108.51 9.11
 2 0 7 113.79 15.49
 2 0 8 366.5 19.34
 2 0 8 373.9 17.68
 2 0 9 351.52 18.2
 2 0 9 384.3 32.99
 2 0 10 54.84 12.69
 2 0 11 188.4 25.63
 2 0 12 56.27 13.38
 2 0 13 17.47 5.48
 2 0 14 1.44 2.85
 2 0 15 16.84 8.07
 2 0 16 97.51 22.03
 2 0 17 0 7.1
 -2 -1 17 1.97 6.75
 -2 -1 16 -2.02 3.06
 -2 -1 15 25.91 10.32
 -2 -1 15 15.63 9.69
 -2 -1 14 22.16 8.54
 -2 -1 14 12.8 7.06
 -2 -1 13 0.14 1.71
 -2 -1 13 2.89 4.5
 -2 -1 12 2.23 1.55
 -2 -1 12 1.38 2.14
 -2 -1 11 43.07 10.39
 -2 -1 11 57.65 13.19
 -2 -1 10 162.98 22.55
 -2 -1 10 184.47 24.74
 -2 -1 9 7.22 3.29
 -2 -1 9 -4.09 5.48
 -2 -1 8 107.47 15.05
 -2 -1 8 118.2 16.52
 -2 -1 8 104.47 15.57
 -2 -1 7 115.93 15.12
 -2 -1 7 116.29 14.66
 2 1 -6 12.87 2.91
 -2 -1 6 15.55 4.86
 -2 -1 6 11.36 4.12
 -2 -1 5 25.55 5.37
 -2 -1 5 22.82 5.14
 2 1 -5 25.12 4.29
 2 1 -5 19.96 4.11
 2 1 -4 170.49 13.38
 2 1 -4 164.54 13.62
 -2 -1 4 162.88 14
 -2 -1 4 147.68 12.33
 2 1 -3 1451.98 38.57
 2 1 -3 1400 39.22
 2 1 -3 1358.34 39.08
 -2 -1 3 1398.6 39.09
 -2 -1 2 28.8 4.96
 2 1 -2 35.76 5.91
 2 1 -1 599.83 25.12
 -2 -1 1 600.37 23.33
 2 1 -1 568.73 24.67
 2 1 -1 590.1 25.86
 2 1 0 21.12 3.88
 2 1 0 91.23 11.33
 -2 -1 0 19.51 2.26
 2 1 0 103.93 16
 -2 -1 0 20.63 4.04
 2 1 1 550.44 21.61
 -2 -1 -1 519.18 21.06
 2 1 1 536.74 23.45
 -2 -1 -1 511.61 15.57
 2 1 1 565.25 16.01
 2 1 1 517.34 23.54
 -2 -1 -2 112.69 9.4
 2 1 2 130.78 13.48
 -2 -1 -2 118.03 8.91
 2 1 2 137.26 12.39
 2 1 2 122.62 8.88
 2 1 2 113.27 8.83
 2 1 3 574.42 18
 2 1 3 593.76 25.51
 2 1 3 588.4 26.19
 2 1 3 599.88 22.55
 -2 -1 -4 -0.14 1.21
 2 1 4 -2.29 3.7
 2 1 4 -1.8 3.15
 2 1 4 -0.65 3.28
 2 1 4 3.51 0.82
 2 1 5 49.4 3.66
 2 1 5 41.65 6.08
 2 1 5 46.25 7.28
 2 1 5 41.8 6.34
 2 1 6 608.44 30.87
 2 1 6 571.88 24.04
 2 1 6 585.71 24.82
 2 1 7 50.87 9.63
 2 1 7 51.86 7
 2 1 8 3.42 3.04
 2 1 9 8.21 4.38
 2 1 10 7.17 4.35
 2 1 11 36.04 10.22
 2 1 12 42.59 11.73
 2 1 13 62.89 14.64
 2 1 14 97 19.85
 2 1 15 1.82 3.4
 2 1 16 31.84 13.48
 2 1 17 16.57 10.26
 -2 -2 17 5.29 8.53
 -2 -2 16 -0.18 0.94
 -2 -2 15 9.19 6.77
 -2 -2 14 3.43 1.02
 -2 -2 14 17.65 10.16
 -2 -2 13 0.17 3.15
 -2 -2 13 11.2 8.62
 -2 -2 12 4.57 5.48
 -2 -2 12 -2.04 6.17
 -2 -2 11 23.83 8.53
 -2 -2 11 23.39 7.13
 -2 -2 10 203.94 25.55
 -2 -2 10 190.74 23.95
 -2 -2 9 392.91 33.65
 -2 -2 9 348.08 31.25
 2 2 -9 331.83 19.29
 -2 -2 8 100.15 15.6
 -2 -2 8 85.76 14.77
 2 2 -8 97.53 10.54
 2 2 -7 147.96 13.29
 -2 -2 7 147.99 18.71
 -2 -2 7 154.44 18.49
 -2 -2 6 780.25 40.18
 -2 -2 6 662.81 37.2
 2 2 -6 711.13 28.41
 -2 -2 5 810.5 38.53
 2 2 -5 746.37 29.52
 -2 -2 4 381.5 25.58
 -2 -2 3 942.08 37.02
 -2 -2 2 74.9 9.63
 -2 -2 1 1595.39 46.2
 2 2 -1 1647.73 47.67
 2 2 0 752.22 40.8
 -2 -2 0 599.9 21.52
 2 2 1 168.25 11.92
 -2 -2 -1 185.53 11.91
 2 2 2 608.59 28.88
 -2 -2 -2 584.2 22.09
 2 2 2 549.55 23.26
 2 2 3 320.21 18.89
 -2 -2 -3 158.17 10.44
 -2 -2 -4 164.13 8.67
 2 2 4 429.15 23.29
 2 2 5 1895.44 51.88
 2 2 6 5.59 3.64
 2 2 7 15.19 3.73
 2 2 7 20.42 6.23
 2 2 8 -1.1 2.07
 2 2 8 1.15 2.31
 -2 -2 -8 -2.17 2.36
 -2 -2 -9 4.59 2.1
 2 2 9 11.03 3.46
 2 2 9 7.26 3.71
 2 2 10 0.12 0.89
 2 2 10 -2.31 0.99
 2 2 11 18.64 9.73
 2 2 12 3.62 4.42
 2 2 13 15.64 8.15
 2 2 14 4.98 0.8
 2 2 15 -4.41 2.12
 2 2 16 3.77 6.78
 2 2 17 4.72 4.81
 -2 -3 16 -16.55 9.54
 -2 -3 15 1.43 2.78
 -2 -3 14 20.19 11.84
 -2 -3 13 5 4.95
 -2 -3 13 -1.39 3.47
 -2 -3 12 9.53 8.92
 -2 -3 11 2.44 2.07
 -2 -3 11 1.79 2.61
 -2 -3 10 44.48 12.53
 -2 -3 10 45.97 12.5
 -2 -3 9 24.62 9.03
 -2 -3 9 21.11 7.69
 2 3 -9 25.54 5.67
 -2 -3 8 13.76 5.76
 -2 -3 7 182.75 21.8
 -2 -3 6 142.74 18.97
 2 3 -6 129.14 14.53
 2 3 -5 1259.95 44.78
 -2 -3 5 1420.67 57.97
 -2 -3 4 -0.44 2.5
 2 3 -4 -2.92 4.43
 2 3 -3 582.97 30.26
 -2 -3 3 587.11 33.44
 2 3 -2 93.62 11.99
 -2 -3 2 77.07 11.48
 -2 -3 1 91.26 12.37
 2 3 -1 173.63 21
 -2 -3 0 922.41 40.23
 2 3 0 963.92 36.91
 2 3 1 771.12 34.5
 2 3 1 261.69 19.79
 2 3 2 492.91 26.48
 2 3 2 420.13 23.92
 2 3 3 215 17.1
 2 3 3 162.84 15.23
 2 3 4 29.66 7.87
 2 3 4 31.46 6.45
 2 3 5 1596.38 49.03
 2 3 5 1773.54 56.22
 2 3 6 -6.54 4.55
 2 3 6 -2.96 4.13
 2 3 7 468.87 32.23
 2 3 7 407.98 24.04
 2 3 8 177.06 20.72
 2 3 8 166.3 16.35
 2 3 9 16.85 5.52
 2 3 10 43.53 10.38
 2 3 11 31.4 9.77
 2 3 11 30.24 6.4
 2 3 12 119.12 19.62
 2 3 13 45.07 13.09
 2 3 14 20.3 7.55
 2 3 15 -0.11 3.39
 2 3 16 -1.75 1.96
 2 3 17 0.63 5.45
 -2 -4 15 17.25 12.52
 -2 -4 14 5.59 5.43
 -2 -4 13 6.26 7.09
 -2 -4 12 1.82 1.01
 -2 -4 12 -5.68 5.97
 -2 -4 11 15.83 9.04
 -2 -4 11 8.84 1.66
 -2 -4 10 -0.39 3.87
 -2 -4 10 -2.21 4.4
 -2 -4 9 4.11 4.7
 -2 -4 8 4.14 4.17
 2 4 -8 7.35 4.29
 -2 -4 7 135.07 19.97
 2 4 -7 141.41 16.46
 -2 -4 6 0.5 0.84
 2 4 -6 -0.81 3.52
 -2 -4 5 928.87 50.68
 2 4 -5 833.77 39.11
 -2 -4 4 461.02 34.27
 2 4 -4 434.78 28.79
 -2 -4 3 225.59 22.88
 2 4 -3 230.56 22.21
 2 4 -2 32.65 9.9
 -2 -4 2 21.11 7.23
 -2 -4 1 244.38 23.42
 -2 -4 0 177.03 19.77
 2 4 2 14.18 6.78
 2 4 3 3987.91 88.22
 2 4 4 1449.66 55.88
 2 4 4 1092.31 48.03
 2 4 5 447.67 30.37
 2 4 5 459.03 30.97
 2 4 6 65.94 11.8
 2 4 6 62.61 11.1
 -2 -4 -7 4.97 2.69
 2 4 7 4.09 5.12
 2 4 7 1.35 2.59
 2 4 8 241.03 20.81
 2 4 8 256.88 26.48
 -2 -4 -8 177.11 11.44
 2 4 9 48.81 9.36
 -2 -4 -9 24.27 2.79
 2 4 9 57.71 13.09
 2 4 10 165.33 24.27
 2 4 10 147.39 16.3
 2 4 11 252.52 29.26
 2 4 12 112.15 18.81
 2 4 13 5.01 5.25
 2 4 14 12.82 5.82
 2 4 15 57.13 14.48
 2 4 16 21.92 9.68
 2 4 17 6.31 6.14
 -2 -5 14 14.82 10.38
 -2 -5 13 0.1 4.32
 -2 -5 13 -4.4 4.82
 -2 -5 12 -10.87 7.53
 -2 -5 12 -0.94 4.48
 -2 -5 11 66.72 18.32
 -2 -5 11 18.05 9.1
 -2 -5 10 17.42 9.04
 -2 -5 9 22.23 8.64
 2 5 -8 -1.81 4.34
 -2 -5 8 -0.43 4.22
 2 5 -7 57.99 11.73
 -2 -5 7 60.5 14.27
 2 5 -6 3.9 3.48
 -2 -5 6 4.26 5.56
 2 5 -5 49.61 11.94
 -2 -5 5 47.57 12.16
 -2 -5 4 31.76 9.88
 -2 -5 3 34.64 10.24
 -2 -5 2 51.25 12.2
 -2 -5 1 126.83 18.54
 -2 -5 0 122.56 19.02
 -2 -5 -1 282.76 28.12
 2 5 3 87.05 14.44
 2 5 4 475.34 35.08
 2 5 5 89.15 15.26
 2 5 6 503.33 37.79
 2 5 7 237.63 26.28
 -2 -5 -7 189.49 17.13
 -2 -5 -8 35.9 6.81
 2 5 8 49.21 11.26
 2 5 8 49.06 11.61
 2 5 9 -5.84 4.35
 -2 -5 -9 2.86 2.03
 2 5 9 -3.2 4.18
 2 5 10 16.39 5.62
 2 5 10 23.12 8.26
 2 5 11 55.24 13.96
 2 5 11 48.89 11.03
 2 5 12 97.99 19.89
 2 5 13 -0.81 3.94
 2 5 14 66.23 16.53
 2 5 15 19.84 8.79
 2 5 16 -0.95 3.92
 2 5 17 8.83 4.98
 -2 -6 13 -7.04 9.4
 -2 -6 12 -6.68 6.25
 -2 -6 12 0 3.39
 -2 -6 11 -1.57 6.79
 -2 -6 10 -0.78 4.11
 -2 -6 9 35.34 12.88
 -2 -6 8 0.67 3.56
 2 6 -8 18.11 8.37
 -2 -6 7 6.19 6.23
 2 6 -7 -0.16 3.5
 2 6 -6 120.84 19.78
 -2 -6 6 194.83 32.97
 -2 -6 5 109.89 20.01
 -2 -6 4 4.66 3.54
 -2 -6 3 106.16 19.95
 -2 -6 2 596.15 44.2
 -2 -6 1 54.64 15.2
 -2 -6 0 3.47 5.66
 -2 -6 -1 46.62 13.42
 -2 -6 -2 89.76 17.02
 2 6 4 13.55 6.95
 2 6 5 52.15 13.17
 2 6 6 51.48 12.96
 2 6 7 195.97 25.94
 2 6 8 367.41 37.04
 -2 -6 -8 278.56 23.06
 2 6 9 427.83 38.61
 -2 -6 -9 376.99 26.09
 2 6 10 19.08 8.08
 2 6 10 7.46 6.06
 2 6 11 50.56 12.15
 2 6 11 70.44 16.61
 2 6 12 23.42 8.63
 2 6 13 5.58 4.84
 2 6 14 -5.3 6.51
 2 6 15 2.85 4.28
 2 6 16 8.63 10.35
 -2 -7 11 36.69 15.24
 -2 -7 10 0.58 3.76
 -2 -7 9 60.36 16.8
 -2 -7 8 7.59 6.91
 2 7 -8 3.02 2.55
 2 7 -7 8.33 6.43
 -2 -7 7 0.55 3.21
 -2 -7 6 0.26 4.81
 -2 -7 5 59.24 14.92
 -2 -7 4 30.92 11.41
 -2 -7 3 356.99 36.6
 -2 -7 2 198.63 27.78
 -2 -7 1 109.5 22.01
 -2 -7 0 474.93 40.1
 -2 -7 -1 249.89 36.99
 -2 -7 -2 724.66 50.7
 -2 -7 -3 176.28 33.89
 -2 -7 -4 177.01 33.92
 2 7 5 432.18 42.19
 2 7 6 12.83 12.23
 -2 -7 -7 58.88 13.14
 2 7 7 63.05 15.62
 2 7 8 42.14 12.7
 -2 -7 -8 31.46 8.9
 2 7 9 6.59 4.25
 2 7 10 12.81 5.51
 2 7 11 8.64 6.04
 2 7 11 -11.15 6.13
 2 7 12 16.56 9.96
 2 7 12 14.91 8.22
 2 7 13 -1.11 2.72
 2 7 14 1.09 0.44
 2 7 15 9.65 7.98
 -2 -8 9 24.79 15.17
 -2 -8 8 7.69 8.76
 2 8 -7 24.13 11.42
 -2 -8 7 31.64 10.92
 -2 -8 6 8.19 5.95
 -2 -8 5 42.71 14.66
 -2 -8 4 4.59 4.54
 -2 -8 3 1.76 2.88
 -2 -8 2 30.11 9.96
 -2 -8 1 27.25 10.02
 -2 -8 0 -2.63 0.89
 -2 -8 -1 4.72 4.03
 -2 -8 -2 32.04 12.45
 -2 -8 -3 83.89 17.75
 -2 -8 -4 27.06 10.73
 -2 -8 -5 2.98 3.88
 2 8 7 60.45 17.21
 -2 -8 -7 32.28 10.65
 -2 -8 -8 5.74 5.71
 2 8 8 -5.81 2.53
 2 8 9 36.66 13.45
 2 8 10 7.75 5.71
 2 8 11 -3.83 4.7
 2 8 12 4.57 5.97
 2 8 12 2.08 4.6
 2 8 13 4.58 5.61
 2 8 14 -1.26 2.74
 -2 -9 7 1.94 3.46
 -2 -9 6 5.13 5.52
 -2 -9 5 11.72 12.09
 -2 -9 4 31.77 12.25
 -2 -9 3 49.86 16.7
 -2 -9 2 84.76 19.1
 -2 -9 1 10.5 9.13
 -2 -9 0 17.14 9.16
 -2 -9 -1 13.01 9.63
 -2 -9 -2 41.63 14.78
 -2 -9 -3 72.45 18
 -2 -9 -4 20.43 11.51
 -2 -9 -5 11.7 7.61
 -2 -9 -6 10.2 7.4
 -2 -9 -7 10.96 8.33
 -2 -9 -7 12.03 8.92
 2 9 8 44.13 15.44
 -2 -9 -8 29.71 10.16
 2 9 9 9.36 9.16
 2 9 10 -0.16 6.84
 2 9 11 -4.22 4.89
 2 9 12 0.43 1.6
 -2 -10 4 -9.13 7.66
 -2 -10 3 14.79 9
 -2 -10 2 9.45 7.61
 -2 -10 1 6.16 6.4
 -2 -10 0 3.22 7.18
 -2 -10 -1 5.9 4.81
 -2 -10 -2 2.88 2.16
 -2 -10 -3 1.64 2.86
 -2 -10 -4 15.84 10.59
 -2 -10 -5 28.39 12.78
 -2 -10 -6 2.26 5.26
 -2 -10 -6 13.17 9.68
 -2 -10 -7 3.3 3.44
 -2 -10 -7 -1.33 2.96
 -2 -10 -8 -3.84 4.53
 -2 -10 -9 2.57 1.13
 -2 -11 0 0 6.74
 -2 -11 -1 7.82 7.44
 -2 -11 -2 9.32 9.58
 -2 -11 -3 25.35 14.69
 -2 -11 -4 33.01 14.11
 -2 -11 -5 6.05 9.66
 -2 -11 -5 -13.08 8.78
 -2 -11 -6 8.89 6.32
 -2 -11 -6 0.7 3.36
 -2 -11 -7 -3.58 4.45
 -2 -11 -8 -17.89 10.15
 -2 -11 -9 -0.95 2.38
 3 -8 -10 17.29 11.36
 3 -8 -9 7.25 6.28
 3 -8 -8 1.2 5.72
 3 -8 -7 2.38 7.86
 3 -8 -6 10.36 7.38
 3 -8 -5 8.63 8.58
 3 -8 -4 11.3 5.4
 3 -8 -3 3.4 2.98
 3 -8 -2 -2.01 6.31
 3 -8 -1 8.51 6.68
 3 -8 0 5.76 5.12
 3 -8 1 8.18 8.79
 3 -8 2 18.33 11.3
 3 -8 3 44.77 17.79
 3 -8 4 -1.41 4.18
 3 -8 5 21.1 12.2
 3 -7 -13 -9.86 7.52
 3 -7 -12 -1.07 4.17
 3 -7 -11 12.88 8.32
 3 -7 -11 16.6 13.45
 3 -7 -10 -9.99 8.81
 3 -7 -9 30.49 11.83
 3 -7 -8 -0.55 5.42
 3 -7 -7 19.85 10.23
 3 -7 -6 21.09 9.9
 3 -7 -5 0.18 6.1
 3 -7 -4 13.99 8.72
 3 -7 -3 8.51 3.18
 3 -7 -2 12.37 8.8
 3 -7 -1 -3.36 3.33
 3 -7 0 118.56 24.43
 3 -7 1 3.24 3.87
 3 -7 2 18.43 10.79
 3 -7 3 3.86 4.07
 3 -7 4 62.76 19.49
 3 -7 5 21.31 10.37
 3 -7 6 8.73 8.27
 3 -7 7 -1.18 2
 3 -7 8 12.95 9.48
 3 -7 9 4.97 7.97
 3 -6 -13 3.63 5.77
 3 -6 -12 -6.63 7.4
 -3 6 12 -2.43 3.35
 3 -6 -11 3.08 4.47
 3 -6 -11 4.35 6.16
 -3 6 11 5.11 5.21
 3 -6 -10 -2.83 3.36
 3 -6 -10 0 5.71
 -3 6 10 -4.67 5.94
 3 -6 -9 1.68 3.04
 3 -6 -8 10.31 6.48
 3 -6 -7 11.37 7.54
 3 -6 -6 15.75 8.57
 3 -6 -5 26.27 12.26
 3 -6 -4 25.33 10.11
 3 -6 -3 36.4 12.72
 3 -6 -2 120.73 23.06
 3 -6 -1 47.65 13.1
 3 -6 0 20.17 8.36
 3 -6 1 18.39 9.08
 3 -6 2 55.01 15.41
 3 -6 3 18.65 8.09
 3 -6 4 18.01 8.81
 3 -6 5 2.07 5.33
 3 -6 6 11.83 9.09
 3 -6 7 6.22 6.1
 3 -6 7 20.96 10.73
 3 -6 8 6.49 5.03
 3 -6 8 0.22 4.09
 3 -6 9 6.76 5.9
 3 -5 -14 10.74 8.72
 3 -5 -13 -15.32 8.38
 -3 5 13 8.57 9.42
 3 -5 -12 0.15 2.08
 -3 5 12 -2.79 5.15
 3 -5 -11 36.62 13.28
 3 -5 -11 22.72 9.47
 -3 5 11 5.96 2.36
 3 -5 -10 8.58 5.41
 -3 5 10 8.05 6.59
 3 -5 -9 1.81 0.96
 3 -5 -9 -5.67 4.67
 -3 5 9 6.35 6.16
 3 -5 -8 24.86 9.75
 -3 5 8 23.56 7.94
 3 -5 -7 10.33 7.29
 3 -5 -6 3.83 4.7
 3 -5 -5 21.76 9.81
 3 -5 -4 204.57 29.85
 3 -5 -3 133.74 22.84
 3 -5 -2 -0.46 3.26
 3 -5 -1 232.91 30.18
 3 -5 0 59 14.84
 3 -5 1 95.49 20.15
 3 -5 2 559.82 47.85
 3 -5 3 70.77 17.17
 3 -5 4 41.05 13.49
 3 -5 5 54.7 15.06
 3 -5 6 26.05 11.25
 3 -5 7 11.6 6.99
 3 -5 7 14.92 7.95
 3 -5 8 22.71 8.49
 3 -5 8 19.71 9.42
 3 -5 9 4.63 5.38
 3 -5 10 4.88 5.09
 3 -5 11 7.35 6.52
 3 -5 12 1.56 3.07
 -3 4 14 7.51 7.73
 3 -4 -14 8.92 6.78
 3 -4 -13 2.6 4.47
 -3 4 13 1.49 3.92
 3 -4 -12 -1.83 4.17
 -3 4 12 0.91 5.37
 3 -4 -11 0.11 2.18
 -3 4 11 1.06 2.18
 3 -4 -11 2.02 4.41
 3 -4 -10 2.61 3.28
 -3 4 10 4.03 3.43
 3 -4 -10 6.9 4.04
 3 -4 -9 34.98 11.47
 3 -4 -9 31.08 10.29
 -3 4 9 29.6 9.46
 3 -4 -8 13.23 6.16
 3 -4 -8 17.09 7.12
 -3 4 8 4.5 1.5
 -3 4 7 39.91 10.86
 3 -4 -7 34.79 11.05
 3 -4 -7 32.75 10.02
 3 -4 -6 100.38 18.91
 3 -4 -5 72.33 15.5
 3 -4 -4 461.1 40.87
 3 -4 -3 117.81 21.31
 3 -4 -2 702.44 50.45
 3 -4 -1 4.4 1.85
 3 -4 0 107.39 18.24
 3 -4 1 30.61 9.65
 3 -4 2 27.05 8.49
 3 -4 3 -2.17 4.91
 3 -4 4 -1.46 3.75
 3 -4 5 0.45 3.2
 3 -4 5 7.58 4.49
 3 -4 6 12.03 7.65
 3 -4 6 7.89 4.32
 3 -4 7 15.96 6.91
 3 -4 7 16.6 7.93
 3 -4 8 -3.12 4.91
 3 -4 8 4.64 4.71
 3 -4 9 4.36 4.1
 3 -4 9 10.92 6.66
 3 -4 10 -2.42 3.76
 3 -4 11 13.19 8.74
 3 -4 12 12.78 8.35
 3 -4 13 4.96 8.31
 -3 3 15 -1.22 1.69
 -3 3 14 0.45 3.34
 -3 3 13 -8.23 8.07
 3 -3 -13 3.6 4.63
 -3 3 12 50.9 13.26
 3 -3 -12 48.79 14.59
 3 -3 -11 0.5 2.72
 -3 3 11 0.95 2.36
 3 -3 -10 -1.12 3
 3 -3 -10 1.72 2.05
 -3 3 10 -4.36 4.41
 3 -3 -9 17.45 7.71
 3 -3 -9 23.12 7.13
 -3 3 9 9.21 4.46
 -3 3 8 10.76 6.08
 3 -3 -8 6.73 4.24
 3 -3 -8 13.57 6.51
 3 -3 -7 121.42 19.7
 -3 3 7 124.03 17.19
 3 -3 -7 138.18 19.37
 3 -3 -6 37.47 10.53
 3 -3 -6 37.5 10.66
 -3 3 6 40.45 9.77
 3 -3 -5 54.6 12.98
 3 -3 -5 47.46 11.07
 -3 3 5 53.51 10.05
 3 -3 -4 40.87 10.76
 3 -3 -4 35.84 9.32
 3 -3 -3 339.31 30.44
 3 -3 -3 339.25 32.38
 3 -3 -2 373.92 32.62
 3 -3 -2 403.54 35.2
 3 -3 -1 69.17 14.55
 3 -3 -1 61.28 12.91
 3 -3 0 549.06 39.11
 3 -3 0 597.44 41.63
 -3 3 -1 21.54 5.71
 3 -3 1 20.05 7.24
 3 -3 1 19.08 7.41
 3 -3 2 -2.89 3.72
 3 -3 2 0.94 1.93
 3 -3 3 35.75 9.93
 3 -3 3 26.67 8.65
 3 -3 4 33.55 10.11
 3 -3 4 25.03 7.23
 3 -3 5 0.31 3.1
 3 -3 5 4.37 3.57
 3 -3 6 192.81 23.88
 3 -3 6 178.52 21.6
 3 -3 7 104.91 17.24
 3 -3 7 97.95 15.72
 3 -3 8 0.1 4.47
 3 -3 8 5.95 4.32
 3 -3 8 2.14 1.17
 3 -3 9 1.72 0.83
 3 -3 9 0.5 0.91
 3 -3 10 7.1 4.7
 3 -3 11 12.51 7.77
 3 -3 12 9.32 4.13
 3 -3 13 0.06 2.79
 3 -3 14 1.78 3.47
 -3 2 15 14.4 10.03
 -3 2 14 2.53 3.38
 -3 2 13 -6.64 7.14
 -3 2 13 -0.26 3.24
 -3 2 12 42.08 12.47
 -3 2 12 48.76 13.2
 3 -2 -12 27.65 10.43
 -3 2 11 4.28 3.34
 3 -2 -11 -7.04 6.26
 -3 2 11 -2.42 5.67
 -3 2 10 0.24 2.58
 -3 2 10 -7.49 7.2
 3 -2 -10 1.62 2.99
 3 -2 -9 2.44 0.41
 -3 2 9 2.65 3.41
 -3 2 9 2.91 3.75
 -3 2 8 76.48 12.99
 3 -2 -8 103.34 15.61
 -3 2 8 78.18 15.66
 3 -2 -8 76.49 15.03
 3 -2 -7 13.48 6.08
 3 -2 -7 13.66 4.82
 -3 2 7 14.58 6.54
 -3 2 7 15.08 5.72
 3 -2 -6 12.78 6.44
 3 -2 -6 7.62 3.38
 -3 2 6 8.59 1.49
 -3 2 6 9.8 3.22
 -3 2 5 158.79 20.37
 3 -2 -5 149.86 20.14
 -3 2 5 132.04 14.84
 3 -2 -5 141.91 17.68
 -3 2 4 108.22 17.13
 3 -2 -4 109.24 16.86
 3 -2 -4 98.9 15.03
 -3 2 3 689.64 39.92
 3 -2 -3 708.32 42.53
 3 -2 -3 657.88 39.24
 3 -2 -2 -1.24 4.1
 3 -2 -2 -0.5 0.38
 -3 2 2 -1.61 1.19
 3 -2 -1 8.82 4.88
 3 -2 -1 6.09 1.28
 -3 2 0 -0.03 0.41
 3 -2 0 -1.73 4.59
 3 -2 0 1.26 3.65
 3 -2 1 196.16 22.29
 3 -2 1 171.32 20.06
 3 -2 2 791.33 43.15
 3 -2 2 703.83 39.89
 3 -2 3 239.03 22.93
 3 -2 3 201.89 20.77
 3 -2 4 505.38 32.87
 3 -2 4 444.73 30.98
 3 -2 5 181.54 20.21
 3 -2 5 154.87 17.58
 3 -2 6 168.51 19.78
 3 -2 6 198.93 21.1
 3 -2 7 358.52 31.66
 3 -2 7 335.62 28.57
 3 -2 7 353.29 27.8
 3 -2 8 232.73 27.43
 3 -2 8 231.41 22.68
 3 -2 9 13.68 5.71
 3 -2 9 14.42 4.46
 3 -2 10 70.58 16.48
 3 -2 11 77.6 17.32
 3 -2 12 24.17 9.85
 3 -2 13 -3.9 5.2
 3 -2 14 15.56 9.22
 3 -2 15 3.18 8.13
 -3 1 16 -1.55 2.94
 -3 1 16 0.94 5.03
 -3 1 15 6.1 5.53
 -3 1 15 1.39 3.25
 -3 1 14 15.2 8.37
 -3 1 14 -0.37 6.59
 -3 1 13 6.41 2.89
 -3 1 13 17.7 8.29
 -3 1 12 -1.37 3.73
 -3 1 12 3.86 4.98
 -3 1 11 53.34 14.09
 -3 1 11 47.45 13.04
 -3 1 10 1.81 2.56
 -3 1 10 -4.29 4.86
 3 -1 -10 -0.35 2.8
 3 -1 -9 17.91 6.64
 -3 1 9 27.22 8.29
 -3 1 9 22.25 6.17
 -3 1 8 6.88 3.98
 -3 1 8 9.85 4.75
 3 -1 -8 5.72 3.8
 3 -1 -7 5.79 4.68
 -3 1 7 8.13 4.14
 -3 1 7 6.04 1.44
 3 -1 -6 37.78 9.41
 -3 1 6 46.94 10.54
 3 -1 -6 19.59 4.45
 -3 1 6 32.17 6.21
 -3 1 5 152.54 18.31
 3 -1 -5 158.07 19.61
 -3 1 5 142.09 13.12
 3 -1 -4 45.58 9.42
 3 -1 -4 44.99 10.15
 -3 1 4 36.26 5.98
 3 -1 -4 37.85 5.9
 -3 1 4 41.14 9.66
 3 -1 -3 257.22 23.2
 -3 1 3 216.98 20.42
 3 -1 -3 240.13 23.03
 -3 1 2 222.35 20.21
 3 -1 -2 229.66 22.22
 3 -1 -2 229.51 21.72
 3 -1 -1 173.13 19.31
 -3 1 1 152.86 16.06
 3 -1 -1 156.88 17.92
 3 -1 0 55.71 10.6
 -3 1 0 52.55 9.34
 3 -1 0 51.37 11.19
 -3 1 -1 647.65 31.23
 3 -1 1 617.87 35.6
 3 -1 1 667.19 35.24
 3 -1 2 51.57 10.01
 3 -1 2 53.87 9.79
 -3 1 -2 55.89 8.25
 3 -1 3 1167.54 47.65
 3 -1 3 975.32 44.93
 3 -1 4 742.59 39.56
 3 -1 4 775.62 36.06
 3 -1 4 836.51 39.07
 3 -1 5 33.93 7.46
 3 -1 5 36.47 8.01
 3 -1 6 94.78 12.81
 3 -1 6 95.13 14.37
 3 -1 7 30.86 6.52
 3 -1 7 28.85 7.6
 3 -1 8 221.99 24.68
 3 -1 8 219.86 19.69
 3 -1 9 489.59 39.49
 3 -1 9 455.09 29.23
 3 -1 10 7.92 4.53
 3 -1 11 5.84 4.96
 3 -1 12 170.25 26.5
 3 -1 13 0.3 4.02
 3 -1 14 5.98 6.69
 3 -1 15 -10.99 7.29
 3 -1 16 4.05 4.67
 -3 0 16 5.57 7.88
 -3 0 16 -2.93 4.5
 -3 0 15 25.89 10.91
 -3 0 15 12.09 6.55
 -3 0 14 4.11 4.53
 -3 0 14 -10.99 8.95
 -3 0 13 23.31 9.77
 -3 0 13 19.34 9.69
 -3 0 12 5.02 4.55
 -3 0 12 2.57 3.15
 -3 0 11 34.08 10.16
 -3 0 11 35.59 11.59
 3 0 -10 235.96 20.47
 -3 0 10 207.22 25.49
 -3 0 10 219.13 24.82
 3 0 -9 345.08 25.39
 -3 0 9 293.05 30.06
 -3 0 9 296.47 26.12
 3 0 -8 725.41 36.52
 -3 0 8 694.11 45.5
 -3 0 8 677.98 36.35
 3 0 -7 169.97 17.54
 -3 0 7 180.76 22.89
 -3 0 7 151.67 14.4
 3 0 -7 169.8 21.61
 -3 0 6 7.31 1.19
 -3 0 6 14.46 7.25
 3 0 -6 13.68 5.84
 3 0 -5 44.23 7.36
 -3 0 5 69.87 8.33
 3 0 -5 56.08 12.01
 -3 0 5 64.8 13.78
 -3 0 5 51.74 6.97
 -3 0 4 364.54 16.88
 -3 0 4 299.07 14.63
 3 0 -4 315.05 26.45
 3 0 -3 1.79 0.66
 -3 0 3 10.65 3.32
 -3 0 3 4.54 5.23
 -3 0 3 3.28 1.5
 3 0 -2 1.19 0.87
 -3 0 2 2.51 1.33
 -3 0 2 2 4.36
 -3 0 1 438.27 30.54
 3 0 -1 348.69 24.81
 3 0 0 47.06 8.15
 -3 0 0 67.8 12.46
 -3 0 -1 333.34 23.48
 3 0 1 309.07 12.79
 3 0 1 274.75 20.1
 -3 0 -2 1331.92 41.2
 3 0 2 1335.27 33.52
 3 0 2 1271.29 42.81
 3 0 3 2342 58.43
 -3 0 -3 2247.6 47.7
 3 0 3 2280.91 50.84
 -3 0 -4 178.87 11.65
 3 0 4 201.51 16.91
 3 0 4 203.71 15.92
 3 0 5 208.17 15.62
 3 0 5 215.55 19
 3 0 6 96.59 13.71
 3 0 6 92.07 10.27
 3 0 7 -1.11 1.2
 3 0 7 -3.61 4.68
 3 0 8 3.66 2.19
 3 0 8 3.25 2.84
 3 0 8 -0.26 3.09
 3 0 9 41.63 8.11
 3 0 9 42.88 10.85
 3 0 9 53.1 7.48
 3 0 10 663.88 33.28
 3 0 10 694.88 47.81
 3 0 11 28.07 9.34
 3 0 12 23.93 8.77
 3 0 13 9.33 6.24
 3 0 14 11.77 6.89
 3 0 15 19.74 10.21
 3 0 16 -2.16 3.36
 -3 -1 16 -4.66 10.37
 -3 -1 16 -11.4 7.23
 -3 -1 15 2.73 2.08
 -3 -1 15 8.37 8.31
 -3 -1 14 -5.31 3.64
 -3 -1 14 0.28 2.18
 -3 -1 13 8 5.88
 -3 -1 13 6.29 3.96
 -3 -1 12 29.36 10.02
 -3 -1 12 15 6.58
 -3 -1 11 6.44 5.24
 -3 -1 11 2.62 2.21
 -3 -1 10 5.52 2.06
 -3 -1 10 4.17 1.45
 -3 -1 9 755.9 39.78
 -3 -1 9 1011.76 62.67
 -3 -1 8 30.36 7.15
 3 1 -8 31.79 6.91
 -3 -1 8 17.59 4.75
 -3 -1 8 11.66 2.31
 -3 -1 7 415.39 28.15
 3 1 -7 393.78 26.09
 -3 -1 7 407.1 34.19
 -3 -1 7 334.64 22.71
 -3 -1 6 43.31 6.74
 3 1 -6 56.17 9.78
 -3 -1 6 63.44 9.12
 -3 -1 5 364.25 22.71
 3 1 -5 340.38 24.94
 -3 -1 5 308.11 16.87
 3 1 -5 325.88 24.3
 3 1 -4 1295.77 48.54
 3 1 -4 1221.73 46.31
 -3 -1 4 1222.69 29.44
 -3 -1 3 34.44 3.51
 -3 -1 3 39.97 6.85
 3 1 -3 37.12 9.06
 3 1 -3 32.31 8.92
 3 1 -2 -0.6 1.41
 3 1 -2 -1.54 1.63
 3 1 -2 -1.39 2.92
 -3 -1 1 9.28 4.45
 3 1 -1 -3.16 1.23
 3 1 0 1504.24 49.65
 3 1 0 1576.55 50.22
 3 1 0 1493.59 48.6
 3 1 1 418.16 23.86
 3 1 1 434.19 14.1
 3 1 2 -2.12 2.66
 3 1 2 -0.31 1.74
 3 1 3 234.49 19.64
 3 1 3 269.84 16.72
 3 1 3 245.16 19.85
 3 1 3 231.68 15.77
 3 1 4 69.16 9.18
 3 1 4 73.57 11.52
 3 1 4 77.8 11.62
 3 1 4 70.05 8.06
 -3 -1 -4 71.68 9.22
 3 1 5 329.96 23.72
 3 1 5 300.82 22.64
 3 1 5 317.95 21.31
 3 1 5 311.23 15.94
 3 1 6 10.51 2.58
 3 1 6 9.12 2.39
 3 1 6 10.92 2.66
 3 1 6 9.15 3.03
 3 1 7 21.16 5.84
 3 1 7 22.39 3.29
 3 1 7 23.99 7.44
 3 1 8 3.32 2.89
 3 1 8 -2.76 3.26
 3 1 9 22.91 7.85
 3 1 10 1.76 1.17
 3 1 11 185.68 24.49
 3 1 12 65.6 14.15
 3 1 13 -4.62 3.83
 3 1 14 25 9.77
 3 1 15 -2.52 5.83
 3 1 16 -8.22 6.59
 3 1 17 1.27 2.75
 -3 -2 16 -19.98 9.77
 -3 -2 15 2.83 0.74
 -3 -2 15 7.83 8.81
 -3 -2 14 13.2 7.27
 -3 -2 14 17.79 9.42
 -3 -2 13 6.1 5.9
 -3 -2 13 1.96 3.14
 -3 -2 12 6.5 5.17
 -3 -2 12 -2.14 4.67
 -3 -2 11 4.28 4.04
 -3 -2 11 -0.48 1.18
 -3 -2 10 135.6 20
 -3 -2 10 130.33 20.89
 -3 -2 10 118.51 17.82
 -3 -2 9 227.37 25.67
 -3 -2 9 212.32 23.22
 -3 -2 8 174.21 20.62
 -3 -2 8 160.55 18.67
 3 2 -8 154.51 16.82
 3 2 -7 -1.67 4.25
 -3 -2 7 -0.13 4.51
 -3 -2 7 -4.02 5.37
 -3 -2 6 2.94 1.8
 -3 -2 6 1.18 0.92
 -3 -2 5 64.66 11.1
 -3 -2 5 64.01 10.4
 3 2 -5 65.5 10.45
 -3 -2 4 68.61 11.14
 3 2 -4 70.53 11.42
 -3 -2 3 43.54 9.19
 3 2 -3 33.28 7.88
 -3 -2 2 812.52 35.62
 3 2 -2 768.6 35.99
 3 2 -2 805.6 36.7
 -3 -2 1 439.84 26.84
 3 2 -1 464.94 29.44
 3 2 0 500.56 31.54
 3 2 0 742.89 35.71
 3 2 1 1288.05 45.06
 -3 -2 -1 1141.22 29.25
 3 2 1 1205.13 44.92
 3 2 1 1228.28 32.07
 3 2 2 129.38 11.33
 -3 -2 -2 131.16 10.7
 3 2 3 30.11 7.17
 3 2 3 26.76 4.96
 3 2 3 46.64 9.58
 3 2 4 144.48 15.76
 3 2 4 155.24 15.26
 3 2 4 176.59 17
 3 2 5 613.73 32.63
 3 2 5 578.83 29.74
 3 2 6 119.31 14.89
 3 2 6 141.35 15.77
 3 2 7 -0.55 2.81
 3 2 7 -3.98 3.12
 3 2 8 153.25 19.69
 3 2 8 130.59 14.65
 3 2 9 41.83 8.21
 3 2 9 40.48 10.56
 3 2 10 98.27 17.47
 3 2 10 96.34 12.56
 3 2 11 1.23 4.4
 3 2 12 47.7 13.54
 3 2 13 9.04 6.63
 3 2 14 11.74 6.9
 3 2 15 32.68 11.49
 3 2 16 7.37 7.68
 3 2 17 3.17 3.66
 -3 -3 15 13.3 11.4
 -3 -3 14 11.11 1.42
 -3 -3 14 35.11 13.51
 -3 -3 13 -2.8 5.81
 -3 -3 13 -3.16 4.77
 -3 -3 12 -4.31 4.2
 -3 -3 12 -2.37 1.49
 -3 -3 12 0.82 5.16
 -3 -3 11 18.83 7.31
 -3 -3 11 16.16 7.67
 -3 -3 10 0.74 4.3
 -3 -3 10 -3.83 4.62
 -3 -3 9 28.2 11.5
 -3 -3 9 18.19 7.05
 3 3 -9 12.39 4.53
 -3 -3 8 713.93 45.49
 3 3 -8 737.02 38.85
 -3 -3 8 667.91 43.22
 -3 -3 7 108.35 15.78
 -3 -3 7 139.2 19.93
 3 3 -7 120.48 14.88
 -3 -3 6 -1.35 2.88
 3 3 -6 2.72 3.59
 -3 -3 5 19.52 7.36
 3 3 -5 14.71 5.19
 -3 -3 4 272.75 24.41
 -3 -3 3 64.42 12.21
 -3 -3 2 521.01 32.21
 -3 -3 1 37.03 8.83
 -3 -3 0 1.91 2.75
 3 3 2 324.55 23.6
 3 3 3 266.49 21.32
 3 3 4 29.36 6.03
 -3 -3 -5 231.19 13.86
 3 3 5 494.01 31
 -3 -3 -6 17.93 3.45
 3 3 6 47.02 9.73
 3 3 7 549.42 35.02
 3 3 7 535.39 31.04
 3 3 8 13.2 4.07
 3 3 8 16.34 6.46
 3 3 9 249.83 25.87
 3 3 9 234.25 20.27
 3 3 10 -2.28 4.04
 3 3 10 -2.65 4.04
 3 3 11 254.04 28.43
 3 3 11 274.17 22.21
 3 3 12 208.24 26.21
 3 3 13 22.99 8.78
 3 3 14 19.98 8.37
 3 3 15 0.05 3.13
 3 3 16 0.84 2.94
 3 3 17 -7.18 6.19
 -3 -4 16 0 5.31
 -3 -4 15 -26.18 12.16
 -3 -4 14 -1.8 7.69
 -3 -4 13 7.12 6.08
 -3 -4 13 7.22 9.03
 -3 -4 12 9.53 6.24
 -3 -4 12 -2.22 7.36
 -3 -4 11 19.67 9.69
 -3 -4 11 24.42 10.13
 -3 -4 10 -1.13 4.98
 -3 -4 10 1.84 1.95
 -3 -4 9 4.57 0.12
 3 4 -9 6.07 3.75
 -3 -4 9 6.46 3.05
 -3 -4 8 65.38 15.37
 3 4 -8 60.6 11.63
 -3 -4 7 14.49 7.03
 -3 -4 6 174.27 23.64
 -3 -4 5 24.68 9.08
 -3 -4 4 54.07 11.79
 3 4 -4 58.6 11.93
 -3 -4 3 66.85 13.58
 3 4 -3 59.73 11.72
 -3 -4 2 13.85 6.3
 3 4 -2 18.28 6.7
 -3 -4 1 59.19 12.13
 3 4 -1 78.74 13.5
 -3 -4 0 105.05 16.39
 3 4 0 151.2 18.25
 3 4 1 154.57 18.39
 3 4 2 60.3 11.25
 3 4 2 106.45 14.1
 3 4 3 27.64 10.01
 3 4 3 2.86 2.73
 3 4 4 145.24 18.03
 3 4 4 140.91 18.32
 3 4 5 136.84 16.81
 3 4 5 137.17 18.04
 3 4 6 295.35 25.52
 3 4 6 280.65 25.67
 3 4 7 37.16 9.47
 3 4 7 40.67 10.05
 3 4 8 7.72 3.94
 3 4 9 65.55 14.48
 3 4 10 217.45 28.56
 3 4 11 5.45 3.28
 3 4 11 4.55 3.73
 3 4 12 15.18 7.31
 3 4 13 42.56 12.14
 3 4 14 -3.09 5.41
 3 4 15 -7.92 8.12
 3 4 16 4.75 5.75
 3 4 17 0 5.12
 -3 -5 15 -1.87 3.37
 -3 -5 14 -4.92 5.53
 -3 -5 14 13.64 13.03
 -3 -5 13 -6.16 5.98
 -3 -5 13 9.87 10.61
 -3 -5 12 22.69 12.09
 -3 -5 12 38.3 14.98
 -3 -5 11 -9.69 7.24
 -3 -5 11 5.55 6.67
 -3 -5 10 26.4 11.16
 -3 -5 10 30.44 12.64
 -3 -5 9 19.95 9.51
 -3 -5 8 9.16 7.08
 -3 -5 7 62.42 15.04
 3 5 -7 59.62 13.7
 -3 -5 6 267.91 30.82
 3 5 -6 248.56 26.25
 -3 -5 5 0.18 3.57
 3 5 -5 -0.26 2.3
 -3 -5 4 70.35 15.25
 3 5 -4 53.76 12.64
 -3 -5 3 609.83 43.49
 3 5 -3 561.66 38.77
 -3 -5 2 309.58 30.04
 3 5 -2 359.65 31.68
 -3 -5 1 177.02 27.77
 3 5 -1 377.97 32.23
 -3 -5 0 828.5 52.67
 3 5 0 1039.97 51.78
 -3 -5 -1 896.01 54.01
 3 5 1 1144.18 52.97
 3 5 2 352.91 31.63
 3 5 3 88.07 15.58
 3 5 3 78.92 14.19
 3 5 4 63.71 14.55
 3 5 4 41.75 10.38
 3 5 5 154.81 20.64
 3 5 5 123.24 18.8
 3 5 6 16.18 6.72
 3 5 6 6.26 2.85
 3 5 7 132.96 19.5
 3 5 7 119.24 18.09
 3 5 8 -1.43 3.18
 3 5 8 3.4 0.54
 3 5 9 40.37 10.53
 3 5 9 50.26 12.58
 3 5 10 25.41 8.69
 3 5 10 27.91 9.91
 3 5 11 -1.3 2.75
 3 5 12 16.27 7.38
 3 5 13 28.63 10.57
 3 5 14 -6.37 6.24
 3 5 15 43.69 15.43
 3 5 16 12.87 8.4
 -3 -6 13 11.1 10.6
 -3 -6 12 0 4.63
 -3 -6 12 48.14 20.56
 -3 -6 11 0.48 4.19
 -3 -6 11 6.65 9.74
 -3 -6 10 -2.76 4.86
 -3 -6 9 5.64 5.25
 -3 -6 8 9.67 7.95
 3 6 -8 -2.83 4.39
 -3 -6 7 3.22 2.49
 3 6 -7 4.4 4.87
 -3 -6 6 0.04 1.74
 3 6 -6 -3.14 1.44
 -3 -6 5 87.87 18.96
 3 6 -5 71.56 15.4
 3 6 -4 161.1 22.03
 -3 -6 4 147.71 22.88
 -3 -6 3 66.02 15.77
 3 6 -3 62.69 13.39
 -3 -6 2 184.38 24.46
 3 6 -2 198.49 24.63
 -3 -6 1 110.62 19.34
 3 6 -1 138.76 21.58
 -3 -6 0 30.79 12.21
 3 6 0 76.78 15.09
 -3 -6 -1 91.06 18.19
 3 6 1 102.2 17.42
 -3 -6 -2 71.84 16.14
 3 6 2 99.79 16.37
 3 6 3 49.46 11.95
 3 6 4 35.28 11.19
 3 6 4 25.67 9.49
 3 6 5 48.68 12.04
 3 6 5 39.93 10.83
 3 6 6 39.56 11.39
 3 6 6 28.15 10.29
 3 6 7 67.33 14.97
 3 6 7 81.13 17.96
 3 6 8 -0.68 3.84
 3 6 8 -1.96 5.15
 3 6 9 46.26 12.19
 3 6 9 59.97 14.72
 3 6 10 19.01 8.28
 3 6 10 13.22 7.36
 3 6 11 -0.3 0.91
 3 6 11 5.49 1.99
 3 6 12 13.3 7.51
 3 6 13 4.46 5.19
 3 6 14 11.42 7.32
 3 6 15 5.64 1.37
 3 6 16 2.75 9.02
 -3 -7 12 -14.81 9.52
 -3 -7 11 5.82 6.66
 -3 -7 10 28.41 12.32
 -3 -7 9 -6.26 9.07
 -3 -7 8 16.66 9.33
 -3 -7 7 14.47 9.96
 3 7 -7 -4.16 6.31
 3 7 -6 61.24 15.12
 -3 -7 6 79.99 19.46
 -3 -7 5 22.5 9.29
 3 7 -5 8.46 4.29
 -3 -7 4 86.05 19.12
 3 7 -4 70 15.56
 3 7 -3 29.24 11.16
 -3 -7 3 38.68 13.87
 -3 -7 2 342.41 38.66
 3 7 -2 319.53 34.45
 -3 -7 1 467.18 42.2
 3 7 -1 495.44 43.42
 -3 -7 0 56.75 21.29
 3 7 0 146.47 26.01
 -3 -7 -1 8.42 9.39
 3 7 1 32.78 11.56
 3 7 2 59.93 15.45
 -3 -7 -2 58.04 16.75
 -3 -7 -3 123.99 25.54
 3 7 3 142.24 23.54
 3 7 4 172.38 26.64
 3 7 5 1.21 10.42
 3 7 5 49.56 13.26
 3 7 6 52.23 14.25
 3 7 6 55.67 16.03
 3 7 7 52 13.34
 3 7 7 57.64 15.21
 3 7 8 8.94 5.44
 3 7 8 18.64 8.35
 3 7 9 2.57 4.07
 3 7 9 8.74 5.45
 3 7 10 16.68 7.44
 3 7 10 5.31 3.82
 3 7 11 10.03 6.08
 3 7 11 0 1.62
 3 7 12 -8.1 7.77
 3 7 13 5.7 7.21
 3 7 14 43.11 15.11
 3 7 15 17.86 10.24
 -3 -8 9 21.62 11.81
 -3 -8 8 64.93 18.29
 -3 -8 7 0.3 5.21
 -3 -8 6 11.84 9.33
 3 8 -6 5.99 6.43
 -3 -8 5 42.09 15.73
 3 8 -5 1.6 2.35
 3 8 -4 50.96 15.37
 -3 -8 4 60.66 17.59
 -3 -8 3 14.93 8.87
 3 8 -3 19.62 8.82
 3 8 -2 103.92 21.62
 -3 -8 2 113.27 22.37
 3 8 -1 12.51 6.28
 -3 -8 1 5.25 7.44
 3 8 0 0.51 2.3
 -3 -8 0 3.63 0.91
 -3 -8 -1 9.82 9.75
 3 8 1 7.69 5.47
 -3 -8 -2 85.42 20.2
 -3 -8 -3 106.06 23.34
 -3 -8 -4 78.92 19.14
 3 8 4 66.62 16.28
 -3 -8 -5 32.01 15.13
 3 8 5 12.71 5.5
 3 8 6 22.34 10.71
 3 8 7 0 3.67
 3 8 7 -3.69 5.27
 3 8 8 11.83 8.31
 3 8 8 10.43 5.86
 3 8 9 1.17 1.81
 3 8 9 12.73 7.32
 3 8 10 0 3.91
 3 8 10 11.09 7.99
 3 8 11 18.29 8.32
 3 8 11 3.01 1.87
 3 8 12 9.87 8.26
 3 8 12 1.9 2.4
 3 8 13 5.49 7.44
 3 8 14 2.1 6.99
 3 9 -6 7.19 6.93
 -3 -9 6 17.75 15.43
 3 9 -5 -6.46 5.46
 -3 -9 5 -12.2 8.57
 -3 -9 4 33.03 14.27
 3 9 -4 14.12 11.04
 3 9 -3 4.76 7.93
 -3 -9 3 5.56 7
 -3 -9 2 29.2 10.47
 3 9 -2 22.93 11.17
 -3 -9 1 11.5 7.86
 3 9 -1 8.31 5.58
 3 9 0 7.54 6.32
 -3 -9 0 -1.03 3.95
 -3 -9 -1 18.79 7.5
 -3 -9 -2 3.83 6.81
 -3 -9 -3 2.75 5.83
 -3 -9 -4 21.06 10.68
 -3 -9 -5 13.74 8.67
 -3 -9 -6 -0.23 3.82
 3 9 6 -1.32 2.47
 3 9 7 4.18 5.72
 3 9 8 0.88 2.7
 3 9 8 -7.16 5.92
 3 9 9 -3.28 3.94
 3 9 9 5.87 7.99
 3 9 10 12.15 7.33
 3 9 10 5.8 9.33
 3 9 11 -16.89 8.47
 3 9 11 17.87 9.29
 3 9 12 28.74 11.18
 3 9 12 34.22 17.45
 3 10 -6 0.09 4.47
 3 10 -5 15.67 9.09
 3 10 -4 8.4 10.66
 -3 -10 3 -11.84 8.87
 3 10 -3 11.62 11.37
 -3 -10 2 -6.07 6.07
 3 10 -2 1.51 5.27
 -3 -10 1 11.33 10.87
 3 10 -1 17.83 11.75
 3 10 0 9.21 8.91
 -3 -10 0 32.56 14.82
 -3 -10 -1 13.63 11.6
 -3 -10 -2 24.85 12.86
 -3 -10 -3 23.97 10.79
 -3 -10 -4 9.04 9.48
 -3 -10 -5 23.21 11.21
 -3 -10 -6 0 4.17
 -3 -10 -7 8.65 9.35
 3 10 7 -0.4 1.45
 -3 -10 -8 24.52 12.94
 3 10 8 8.52 6.81
 3 10 9 25.37 11.91
 -3 -10 -9 31.85 14.43
 3 10 10 10.06 8.05
 3 10 10 -24.32 11.27
 3 10 11 26.75 11.62
 -3 -11 -2 10.54 9.05
 -3 -11 -3 -9.28 7.4
 -3 -11 -4 -6.26 6.13
 -3 -11 -5 -4.02 5.02
 -3 -11 -6 4.36 5.08
 4 -7 -11 -7.83 6.64
 4 -7 -10 -20.99 11.14
 4 -7 -9 -1.17 2.96
 4 -7 -9 -9.28 7.39
 4 -7 -8 14.39 9.85
 4 -7 -8 6.82 10.11
 4 -7 -7 1.81 8.7
 4 -7 -7 -1.47 2.92
 4 -7 -6 13.67 8.8
 4 -7 -6 4.21 10.12
 4 -7 -5 -1.35 4.74
 4 -7 -5 3.4 3.81
 4 -7 -4 -3.09 4.11
 4 -7 -4 2.88 4.11
 4 -7 -3 -0.03 5.92
 4 -7 -2 6.12 7.62
 4 -7 -1 -1.87 8.98
 4 -7 0 -7.01 9.79
 4 -7 0 6.69 6.8
 4 -7 1 5.02 7.56
 4 -7 1 -4.97 8.25
 4 -7 2 46.82 18.43
 4 -7 2 39.36 16.76
 4 -7 3 -0.79 8.95
 4 -7 3 0.42 6.35
 4 -7 4 -4.21 7.3
 4 -7 4 -2.97 7.79
 4 -7 5 30.39 15.05
 4 -7 5 19.45 11.06
 4 -7 6 -0.43 2.15
 4 -7 6 4.9 6.63
 4 -7 7 -4.01 4.68
 4 -7 7 0.14 1.04
 4 -6 -12 -6.39 6.08
 4 -6 -11 -3.37 7.86
 4 -6 -11 -14.95 8.56
 4 -6 -10 -1.56 5.34
 4 -6 -10 -13.49 8.18
 4 -6 -9 6.6 5.08
 4 -6 -9 2.31 3.46
 4 -6 -8 0.44 4.02
 4 -6 -8 -0.48 1.57
 4 -6 -7 66.03 18.93
 4 -6 -7 48.72 16.8
 4 -6 -6 1.45 2.85
 4 -6 -6 -1.9 3.11
 4 -6 -5 52.39 15.15
 4 -6 -5 47.57 15.65
 4 -6 -4 -1.12 5.72
 4 -6 -4 1.21 4.65
 4 -6 -3 52.11 15.28
 4 -6 -3 56.09 16.51
 4 -6 -2 11.82 8.81
 4 -6 -2 12.04 7.53
 4 -6 -1 -0.09 5.91
 4 -6 -1 -0.9 5.17
 4 -6 0 18.53 9.27
 4 -6 0 21.45 9.93
 4 -6 1 -0.94 6.27
 4 -6 1 2.93 2.62
 4 -6 2 6.93 1.77
 4 -6 2 5 5.19
 4 -6 3 10.04 8.73
 4 -6 3 7.34 7.05
 4 -6 4 -10.18 10.13
 4 -6 4 -5.42 8.54
 4 -6 5 14.37 9.66
 4 -6 5 22.05 10.95
 4 -6 6 2.18 3.37
 4 -6 6 -3.1 5.5
 4 -6 7 10.15 7.99
 4 -6 7 7.13 5.73
 4 -6 8 1.69 5.73
 4 -5 -14 -11.42 8.21
 4 -5 -13 -11.17 7.86
 4 -5 -12 2.01 3.72
 4 -5 -11 14.13 9.73
 4 -5 -11 -3.75 4.02
 4 -5 -10 10.33 8.69
 4 -5 -10 13.32 7.53
 4 -5 -9 -0.94 5.59
 4 -5 -9 -5.88 5.04
 4 -5 -8 -0.42 1.68
 4 -5 -8 2.11 3.05
 4 -5 -7 34.36 12.61
 4 -5 -7 28.27 13.12
 4 -5 -6 18.96 10.51
 4 -5 -6 12.55 8.43
 4 -5 -5 4.1 3.83
 4 -5 -5 -1.09 1.26
 4 -5 -4 117.63 23.07
 4 -5 -4 131.06 24.26
 4 -5 -3 -0.26 3.72
 4 -5 -3 -1.16 1.88
 4 -5 -2 19.55 7.79
 4 -5 -2 15.51 7.57
 4 -5 -1 1.07 5.52
 4 -5 -1 -1.06 5.24
 4 -5 0 22.08 10.01
 4 -5 0 9.21 4.31
 4 -5 1 41.64 13.73
 4 -5 1 45.58 13.99
 4 -5 2 12.69 7.71
 4 -5 2 11.76 6.5
 4 -5 3 -3.49 4
 4 -5 3 -4.35 5.85
 4 -5 4 8.13 7.27
 4 -5 4 4.47 4.5
 4 -5 5 0.24 3.43
 4 -5 5 -2.75 3.97
 4 -5 6 1.99 2.3
 4 -5 6 -4.72 5.73
 4 -5 7 2.4 3.81
 4 -5 7 4.21 4.57
 4 -5 8 1.2 0.66
 4 -5 8 2.28 4.25
 4 -5 9 6.19 4.91
 4 -5 10 15.53 11.22
 4 -5 11 6.05 5.96
 4 -4 -15 -10.67 7.85
 4 -4 -14 -4.26 4.9
 4 -4 -13 -3.63 3.83
 4 -4 -12 12.12 9.02
 4 -4 -11 1.48 2.49
 4 -4 -11 -1.16 2.99
 4 -4 -10 2.57 1.3
 4 -4 -10 2.97 5.13
 4 -4 -9 5.69 5.75
 4 -4 -9 14.12 7.27
 4 -4 -8 68.41 17.76
 4 -4 -8 57.86 15.09
 4 -4 -7 32.7 12.4
 4 -4 -7 26.98 9.12
 4 -4 -6 32.91 11.69
 4 -4 -6 26.99 10.2
 4 -4 -5 14.21 6.76
 4 -4 -5 16.81 7.99
 4 -4 -4 56.73 15.35
 4 -4 -4 57.5 14.87
 4 -4 -3 343.47 37.27
 4 -4 -3 332.49 35.83
 4 -4 -2 32.56 11.04
 4 -4 -2 21.21 7.95
 4 -4 -1 355.83 38.24
 4 -4 -1 333.1 35.78
 4 -4 0 236.38 31.53
 4 -4 0 193.22 27.52
 4 -4 1 -0.74 2.73
 4 -4 1 -1.67 3.1
 4 -4 2 130.81 22.75
 4 -4 2 117.6 21.28
 4 -4 3 197.08 28.48
 4 -4 3 186.42 26.66
 4 -4 4 11.33 6.89
 4 -4 4 4.81 3.97
 4 -4 5 2.57 3.69
 4 -4 5 5.57 4.96
 4 -4 6 16.75 7.69
 4 -4 6 17.01 7.72
 4 -4 7 3.1 2.1
 4 -4 7 2.83 4.03
 4 -4 8 19.2 8.89
 4 -4 8 19.37 8.79
 4 -4 8 18.19 9.02
 4 -4 9 1.7 4.18
 4 -4 10 17.91 10.42
 4 -4 11 10.96 9.48
 4 -4 12 11.42 8.09
 4 -3 -13 0.64 3.58
 4 -3 -12 4.18 2.65
 4 -3 -11 13.05 7.77
 4 -3 -10 -3.86 5.06
 4 -3 -9 8.1 8.13
 4 -3 -9 -0.88 0.67
 4 -3 -8 61.04 14.83
 4 -3 -8 51.49 14.67
 4 -3 -7 39.27 12.57
 4 -3 -7 32.59 10.03
 4 -3 -6 2.89 3.44
 4 -3 -6 0.44 0.69
 4 -3 -5 24.01 9.16
 4 -3 -5 20.21 8.5
 4 -3 -4 2.89 3.02
 4 -3 -4 1.76 2.59
 4 -3 -3 32.56 9.86
 4 -3 -3 31.18 10.43
 4 -3 -2 162.25 24.16
 4 -3 -2 141.57 21.91
 4 -3 -1 54.8 13.9
 4 -3 -1 53.97 12.63
 4 -3 0 145.99 22.26
 4 -3 0 127.66 20.4
 4 -3 1 1.93 3
 4 -3 1 2.23 4.08
 4 -3 2 15.47 6.75
 4 -3 2 29.69 10.26
 4 -3 3 170.6 24.94
 4 -3 3 130.16 20.65
 4 -3 4 11.99 6.54
 4 -3 4 16.44 7.26
 4 -3 5 54.97 13.26
 4 -3 5 70.26 15.23
 4 -3 6 31.8 10.06
 4 -3 6 35.29 11.38
 4 -3 7 75.88 17.33
 4 -3 7 74.74 16.24
 4 -3 7 76.21 15.81
 4 -3 8 0.82 0.69
 4 -3 8 -4.89 3.86
 4 -3 9 2.79 4.14
 4 -3 10 0 4.2
 4 -3 11 -8.71 6.47
 4 -3 12 -1.74 6.46
 4 -3 13 2.42 7.11
 -4 2 13 22.82 10.13
 -4 2 12 -7.51 7.16
 4 -2 -12 -3.87 1.89
 -4 2 11 34.97 12.62
 4 -2 -11 33.01 12.34
 -4 2 10 -0.52 2.75
 4 -2 -10 -6.15 6.01
 4 -2 -9 21.25 9.22
 -4 2 9 30.42 11.14
 4 -2 -8 22.41 7.94
 -4 2 8 33.27 11.88
 4 -2 -7 7.84 5.1
 -4 2 7 9.13 5.36
 -4 2 7 8.57 3.81
 4 -2 -6 63.49 15.05
 -4 2 6 74.37 16.65
 4 -2 -6 73.78 16.15
 4 -2 -5 29.88 9.74
 4 -2 -5 29.01 10.1
 -4 2 5 36.54 11.35
 4 -2 -4 4.3 4.53
 4 -2 -4 6.34 4.68
 -4 2 4 14.34 9.61
 -4 2 3 733.74 46.92
 4 -2 -3 751.46 49.53
 4 -2 -3 728.44 47.84
 -4 2 2 343.64 30.95
 4 -2 -2 363.23 33.78
 4 -2 -2 327 31.28
 -4 2 1 251.27 24.53
 4 -2 -1 257.13 27.75
 4 -2 -1 241.08 27.04
 4 -2 0 220.42 25.87
 4 -2 0 188 23.76
 4 -2 1 36.05 10.12
 4 -2 1 45.88 10.69
 4 -2 2 12.82 7.19
 4 -2 2 13.44 6.06
 4 -2 3 11.53 5.91
 4 -2 3 17.39 7.09
 4 -2 4 216.55 25.86
 4 -2 4 173.14 23.44
 4 -2 5 261.29 25.88
 4 -2 5 227.48 27.04
 4 -2 5 280.59 28.86
 4 -2 6 1.4 1.22
 4 -2 6 3.47 3.34
 4 -2 7 68.78 14
 4 -2 7 74.75 14.4
 4 -2 8 77.85 16.08
 4 -2 8 88.75 15.71
 4 -2 9 15.81 4.48
 4 -2 10 -2.26 3.76
 4 -2 11 36.24 12.83
 4 -2 12 10.69 7.36
 4 -2 13 0 1.42
 4 -2 14 2.08 4.47
 -4 1 16 1.03 7.01
 -4 1 15 17.31 11.84
 -4 1 14 64.63 18.41
 -4 1 13 -0.98 2.18
 -4 1 12 36.67 12.15
 -4 1 11 34.25 11.08
 4 -1 -10 12.79 5.66
 -4 1 10 6.21 2.77
 4 -1 -10 3.52 3.44
 -4 1 9 110.9 20.27
 4 -1 -9 94.48 19.55
 -4 1 8 14.91 7.43
 -4 1 8 22.03 5.88
 4 -1 -8 17.89 8.96
 -4 1 7 203.42 25.55
 -4 1 7 186.48 16.74
 4 -1 -7 196.31 26.58
 -4 1 6 105.42 18.22
 -4 1 6 98.39 10.99
 4 -1 -6 103.35 18.36
 4 -1 -5 12.44 6.3
 -4 1 5 7.24 3.96
 4 -1 -4 29.09 9.23
 -4 1 4 27.93 8.28
 -4 1 3 -1.05 2.75
 4 -1 -3 1.54 0.3
 4 -1 -2 7.98 4.2
 -4 1 2 11.48 6.4
 4 -1 -2 8.73 2.02
 -4 1 1 328.33 27.43
 4 -1 -1 266.88 13.34
 4 -1 -1 337.34 29.63
 4 -1 0 33.27 9.45
 -4 1 0 35.84 8.8
 4 -1 0 20.19 4.37
 -4 1 -1 65.53 10.54
 4 -1 1 62.53 12.53
 4 -1 2 2.29 3.55
 4 -1 2 -1.16 2.39
 -4 1 -2 1.95 1.49
 4 -1 3 2.58 0.82
 4 -1 3 4.32 2.46
 4 -1 4 5.49 2.61
 4 -1 4 8.19 3.65
 4 -1 5 4.86 3.26
 4 -1 5 5.51 2.71
 4 -1 6 18.36 5.73
 4 -1 6 21.41 6.64
 4 -1 7 46.14 9.65
 4 -1 7 42.47 9.75
 4 -1 8 1.2 2.15
 4 -1 8 -3.92 5.55
 4 -1 9 6.34 3.3
 4 -1 10 7.64 4.28
 4 -1 10 5.08 4.24
 4 -1 11 2.29 1.87
 4 -1 12 2.76 1.56
 4 -1 13 2.18 6.33
 4 -1 14 3.12 6.4
 4 -1 15 0 4.25
 -4 0 16 0.83 4.41
 -4 0 15 -4.35 4.79
 -4 0 14 -4.47 4.67
 -4 0 13 19.02 9.18
 -4 0 12 24.32 10.18
 -4 0 11 17.37 7.27
 4 0 -10 0.23 1.15
 -4 0 10 -3.44 5.02
 4 0 -9 15.05 4.79
 -4 0 9 15.34 6.33
 4 0 -8 9.67 4.64
 -4 0 8 8.35 4.97
 -4 0 8 4.25 2.48
 4 0 -7 0.48 0.73
 -4 0 7 -0.82 4.48
 -4 0 7 1.5 0.28
 4 0 -7 -0.51 3.12
 4 0 -6 10.7 5.65
 -4 0 6 8.67 4.49
 -4 0 6 4.26 2.18
 4 0 -6 10.25 6.5
 -4 0 5 12.8 6.45
 -4 0 5 9.27 2.5
 4 0 -5 5.41 2.65
 4 0 -4 51.69 12.79
 -4 0 4 58.2 6.26
 -4 0 4 57.34 13.32
 -4 0 3 137.97 10.62
 -4 0 3 112.6 18.39
 4 0 -3 103.71 16.29
 4 0 -2 4.11 3.09
 -4 0 2 0.65 2.01
 -4 0 2 1.45 1.61
 -4 0 1 128.05 17.23
 4 0 -1 110.35 16.46
 4 0 0 63.05 11.86
 -4 0 0 69.66 12.92
 -4 0 -1 563.49 32.66
 4 0 1 547.16 16.18
 4 0 1 534.39 34.12
 4 0 2 9.38 4.27
 -4 0 -2 12.6 4
 4 0 2 17.61 3.5
 4 0 3 12.86 4.92
 -4 0 -3 9.49 2.27
 4 0 3 15.91 3.86
 4 0 4 32.38 7.46
 -4 0 -4 33.07 6.5
 4 0 4 39.85 7.45
 4 0 5 3.63 2.25
 -4 0 -5 1.29 0.99
 4 0 5 6.53 2.45
 4 0 6 58.12 11.57
 4 0 6 58.5 9.9
 4 0 7 62.26 12.03
 4 0 7 73.34 13.38
 4 0 7 73.58 10.51
 4 0 8 42.44 9.83
 4 0 8 44.81 10.95
 4 0 8 47.75 8.28
 4 0 9 154.06 19.13
 4 0 9 173.62 22.61
 4 0 10 10.53 5.46
 4 0 10 8.8 5.44
 4 0 11 23.57 9.54
 4 0 12 1.97 4.51
 4 0 13 21.21 9.95
 4 0 14 6.78 6.64
 4 0 15 1.47 2.72
 4 0 16 0 5.62
 -4 -1 16 2.75 9.19
 -4 -1 15 2.78 4.99
 -4 -1 14 2.47 7.01
 -4 -1 13 12.74 6.98
 -4 -1 12 10.11 8.9
 -4 -1 11 11.14 6.88
 -4 -1 10 20.91 9.44
 -4 -1 9 -0.77 5.28
 4 1 -9 3.01 2.84
 -4 -1 9 -2.75 5.18
 -4 -1 8 331.47 26.82
 4 1 -8 370.61 30.45
 -4 -1 8 415.86 42.82
 -4 -1 8 355.9 25.19
 -4 -1 7 38.92 8.67
 -4 -1 7 32.88 10.26
 4 1 -7 39.34 9.74
 -4 -1 7 31.01 6.1
 -4 -1 6 5.92 2.71
 -4 -1 6 9.21 6.65
 4 1 -6 6.49 4.97
 -4 -1 6 5.68 2.84
 -4 -1 5 81.44 11.25
 4 1 -5 80.87 14.77
 -4 -1 5 82.77 16.96
 -4 -1 5 73.14 7.12
 -4 -1 4 19.58 6.07
 4 1 -4 13.27 6.15
 -4 -1 4 11.06 7.44
 4 1 -4 10.52 5.76
 -4 -1 3 276.92 18.63
 4 1 -3 309.28 27.14
 4 1 -3 284.49 28.28
 4 1 -3 317.56 27.77
 -4 -1 2 1.65 1.74
 4 1 -2 3.42 3.98
 -4 -1 1 43.86 7.86
 4 1 -1 55.59 11.73
 4 1 -1 55.26 11.09
 4 1 -1 40.02 10.14
 4 1 0 49.45 11.73
 4 1 0 69.9 13.53
 4 1 0 26.72 7.53
 4 1 1 86.52 14.44
 4 1 1 71.45 12.09
 4 1 1 98.33 15.63
 4 1 2 41.12 8.42
 4 1 2 64.64 12.67
 4 1 2 51.76 10.94
 4 1 2 45.87 5.43
 4 1 3 1.21 0.42
 4 1 3 5.35 4.37
 4 1 3 1.46 1.72
 4 1 4 43.23 10.2
 4 1 4 34.22 9.23
 4 1 4 35.49 7.68
 4 1 4 38.85 6.98
 4 1 5 109.18 15.76
 -4 -1 -5 126.96 12.76
 4 1 5 120.86 13.58
 4 1 5 109.89 12.07
 4 1 6 181.2 20.13
 -4 -1 -6 165.14 12.67
 4 1 6 192.35 18.22
 4 1 6 186 15.16
 4 1 7 524.09 35.13
 4 1 7 507.62 33.1
 4 1 7 472.51 23.42
 4 1 8 195.21 21.28
 4 1 8 201.23 21.82
 4 1 9 5.72 2.97
 4 1 9 5.82 3.58
 4 1 10 16.62 6.63
 4 1 10 13.55 6
 4 1 11 53.27 12.6
 4 1 12 7.45 6.51
 4 1 13 40.44 12.46
 4 1 14 8.03 6.1
 4 1 15 0 3.67
 4 1 16 4.94 6.06
 -4 -2 16 -5.55 5.26
 -4 -2 15 0.72 1.1
 -4 -2 14 3.39 5.95
 -4 -2 13 2.82 5.34
 -4 -2 12 0.39 4.15
 -4 -2 11 15.33 9.62
 -4 -2 10 6.43 4.13
 -4 -2 10 4.55 5.36
 -4 -2 10 1.78 2.18
 -4 -2 9 14.84 7.45
 -4 -2 9 5.16 2.26
 -4 -2 9 6.91 3.74
 -4 -2 8 10.19 5.64
 -4 -2 8 4.97 2.2
 4 2 -7 13.46 4.49
 -4 -2 7 18.37 5.84
 -4 -2 7 23.35 6.51
 4 2 -6 34.84 9.54
 -4 -2 6 32.59 7.93
 -4 -2 6 28.18 6.29
 4 2 -5 5.25 2.56
 -4 -2 5 5.69 1.54
 -4 -2 5 5.25 1.47
 4 2 -5 3.02 2.58
 4 2 -4 37.4 8.73
 -4 -2 4 35.69 5.3
 -4 -2 4 43.83 9.21
 4 2 -4 33.5 9.09
 4 2 -3 18.03 6.55
 -4 -2 3 14.07 5.9
 -4 -2 3 11.67 2.14
 4 2 -3 11.82 5.59
 -4 -2 3 9.75 2.56
 4 2 -2 23.05 8.07
 -4 -2 2 6.21 3.98
 4 2 -2 12.63 6.64
 -4 -2 1 113.23 13.87
 4 2 -1 124.89 16.26
 4 2 -1 117.66 16.95
 4 2 0 34.93 9.47
 4 2 0 50.76 12.11
 4 2 1 46.04 10.43
 4 2 1 63.8 13.61
 4 2 2 123.09 18.07
 4 2 2 103.7 9.66
 4 2 3 242.86 24.11
 4 2 3 260.54 17.58
 4 2 3 284.27 26.12
 4 2 4 52.71 11.36
 4 2 4 32.35 8.64
 4 2 4 32.33 6.8
 4 2 5 4.06 2.86
 4 2 5 3.32 3.48
 4 2 5 2.47 3.14
 4 2 6 -0.55 2.29
 4 2 6 -1.27 3.91
 4 2 6 0.23 0.5
 4 2 7 189.27 20.77
 4 2 7 189.71 20.01
 4 2 7 200.81 21.65
 4 2 8 68.11 12.54
 4 2 8 71.38 13
 4 2 9 29.05 8.4
 4 2 9 21.96 8.88
 4 2 10 -3.65 5.48
 4 2 11 168.84 24.29
 4 2 12 3.45 2.56
 4 2 13 1.71 3.6
 4 2 14 10.52 6.4
 4 2 15 0 5.47
 4 2 16 10.43 8.21
 -4 -3 15 -18.9 10.25
 -4 -3 14 -1.84 3.29
 -4 -3 13 6.91 7.45
 -4 -3 12 -0.12 3.81
 -4 -3 12 -4.24 4.61
 -4 -3 11 4.03 3.67
 -4 -3 11 2.23 6.17
 -4 -3 10 9.54 5.64
 -4 -3 10 7.39 6.25
 4 3 -9 4.69 4.09
 -4 -3 9 4.38 1.91
 -4 -3 9 11.34 4.78
 4 3 -8 55.78 11.47
 -4 -3 8 74.69 14.71
 -4 -3 8 73.73 12.92
 -4 -3 7 128.76 19.19
 -4 -3 7 121.42 16.39
 4 3 -7 119.63 17.72
 -4 -3 6 21.63 3.92
 -4 -3 6 40.71 13.85
 4 3 -6 26.21 7.57
 -4 -3 5 176.92 22.26
 -4 -3 5 139.99 15.24
 4 3 -5 168.62 20.52
 -4 -3 4 166.55 20.03
 4 3 -4 184.23 21.99
 -4 -3 3 84.44 13.6
 4 3 -3 101.34 16.01
 -4 -3 2 11.37 5.94
 -4 -3 2 3.45 2.38
 -4 -3 1 47.93 10.49
 -4 -3 1 26.37 5.18
 4 3 -1 45.79 10.23
 -4 -3 0 -2.95 2.35
 -4 -3 0 5.56 3.52
 4 3 0 11.93 5.46
 -4 -3 -1 9.35 4.58
 4 3 1 1.7 2.9
 4 3 2 4.91 3.39
 4 3 2 1.56 0.84
 4 3 3 14.16 5.28
 4 3 3 16.31 4.73
 4 3 4 27.01 12.69
 4 3 4 -2.74 3.74
 4 3 5 703.96 36.67
 4 3 5 700.8 41.7
 4 3 6 1080.04 48.47
 4 3 6 1064.72 51.52
 4 3 7 -1.41 3.64
 4 3 7 7.58 5.67
 4 3 8 33.39 8.78
 4 3 8 38.72 8.76
 4 3 9 175.3 22.43
 4 3 9 198.21 22.38
 4 3 10 165.24 22.42
 4 3 10 163.78 19.6
 4 3 11 21.51 7.07
 4 3 11 19.69 7.89
 4 3 12 34.38 9.81
 4 3 13 -2.77 1.84
 4 3 14 22.88 9.86
 4 3 15 0.03 0.35
 4 3 16 -5.57 5.37
 -4 -4 15 0.57 3.69
 -4 -4 14 1.66 5.82
 -4 -4 13 4.76 5.6
 -4 -4 13 13.34 8.66
 -4 -4 12 6.42 5.45
 -4 -4 11 -27.89 14.73
 -4 -4 10 8.3 1.94
 -4 -4 10 36.29 12.41
 -4 -4 9 4.41 4.14
 -4 -4 9 4.95 6.85
 4 4 -9 4.15 2.97
 -4 -4 8 -1.49 2.4
 -4 -4 8 12.24 6.99
 4 4 -8 8.41 5.07
 -4 -4 7 12.18 7.91
 -4 -4 7 4.11 3.68
 4 4 -7 1.55 3.32
 -4 -4 6 338.03 32.85
 4 4 -6 286.58 27.15
 -4 -4 5 38.8 11.74
 4 4 -5 28.8 8.96
 -4 -4 4 64.41 13.09
 4 4 -4 69.03 13.81
 -4 -4 3 28.99 9.86
 4 4 -3 29.38 9.75
 -4 -4 2 77.43 17.57
 -4 -4 1 327.58 30.89
 -4 -4 0 29.64 13.99
 4 4 3 341.75 26.36
 4 4 4 7.17 2.01
 4 4 5 70.08 12.34
 4 4 6 125.72 17.6
 4 4 6 121.61 17.72
 4 4 7 5.63 3.3
 4 4 7 5.92 2.46
 4 4 8 85.7 16.29
 4 4 8 75.72 13.44
 4 4 9 186.8 24.41
 4 4 9 184.18 21.76
 4 4 10 39.54 11.23
 4 4 10 38.44 10.52
 4 4 11 40.99 12.28
 4 4 11 37.27 10.46
 4 4 12 25.21 9.92
 4 4 13 10.21 5.23
 4 4 14 -1.56 2.55
 4 4 15 25.1 11.55
 4 4 16 -2.81 3.71
 -4 -5 14 -16.52 10.01
 -4 -5 13 -20.34 10.92
 -4 -5 12 0 1.99
 -4 -5 11 14.54 9.78
 -4 -5 10 0.39 2.62
 -4 -5 10 2 4.17
 -4 -5 9 6.69 3.93
 -4 -5 9 32.09 12.17
 -4 -5 8 6.36 3.33
 4 5 -8 17.93 8.22
 -4 -5 7 100.32 20.63
 4 5 -7 76.27 14.8
 -4 -5 6 40.87 13.61
 4 5 -6 19.14 7.36
 -4 -5 5 42.87 11.15
 -4 -5 4 7.95 7.1
 -4 -5 3 135.8 21.91
 -4 -5 2 35.39 12.17
 -4 -5 1 70.82 15.65
 4 5 -1 110.38 19.07
 -4 -5 0 63.56 15.28
 4 5 0 95.85 17.32
 -4 -5 -1 18.7 9.36
 4 5 1 42.1 10.95
 4 5 2 46.76 18.11
 4 5 3 279.68 27.52
 4 5 3 252.36 29.29
 4 5 4 84.6 17.13
 4 5 4 8.61 7.17
 4 5 5 71.17 13.84
 4 5 6 105.55 17.73
 4 5 7 -2.01 4.97
 4 5 8 70.39 15.51
 4 5 9 2.13 3.63
 4 5 10 1.69 1.36
 4 5 10 4.55 2.93
 4 5 11 -2.53 2.71
 4 5 11 0.64 2.09
 4 5 12 -1.08 2.98
 4 5 13 7.59 5.77
 4 5 14 2.41 6.3
 4 5 15 41.24 16.58
 4 5 16 -4.54 5.04
 -4 -6 11 5.94 8.17
 -4 -6 10 -6.16 5.77
 -4 -6 10 3.38 5.06
 -4 -6 9 -10.54 7.38
 -4 -6 8 0.48 2.81
 4 6 -8 -0.27 3.25
 -4 -6 7 17.46 9.34
 -4 -6 6 6.94 3.85
 -4 -6 5 137.11 23.49
 -4 -6 4 20.34 11.29
 4 6 -4 17.65 9.1
 -4 -6 3 260.36 31.59
 4 6 -3 281.8 31.36
 -4 -6 2 81.48 18.91
 4 6 -2 122.14 21.88
 -4 -6 1 198.1 30.53
 4 6 -1 253.31 29.68
 -4 -6 0 418.62 39.17
 4 6 0 458.67 38.93
 -4 -6 -1 47.6 22.53
 4 6 1 178.73 24.9
 -4 -6 -2 76.12 18.3
 4 6 2 93.55 18.22
 4 6 3 100.3 18.74
 4 6 4 33.53 10.99
 4 6 4 15.79 8.91
 4 6 5 30.44 10.08
 4 6 5 28.63 10.28
 4 6 6 10.09 5.83
 4 6 6 -1.57 5.32
 4 6 7 4.09 3.11
 4 6 7 -0.98 3.17
 4 6 8 4.64 3.35
 4 6 8 0.15 5.36
 4 6 9 17.16 8.83
 4 6 10 22.5 9.37
 4 6 11 -0.77 1.53
 4 6 12 3.51 4.19
 4 6 13 -5.36 5.04
 4 6 14 5.35 5.17
 4 6 15 -14.48 8.74
 -4 -7 10 -6.07 6.07
 -4 -7 9 4.32 5.03
 -4 -7 8 3.16 5.16
 -4 -7 7 0.37 4.85
 -4 -7 6 3.24 6.28
 4 7 -6 -11.9 9.03
 -4 -7 5 29.05 12.12
 4 7 -5 23.46 10.61
 -4 -7 4 12.12 7.45
 4 7 -4 -1.33 3.61
 -4 -7 3 -7.92 6.93
 4 7 -3 5.49 5.42
 -4 -7 2 17.86 9.68
 4 7 -2 14.39 8.23
 -4 -7 1 68.3 17.11
 4 7 -1 82.77 18.18
 -4 -7 0 91.16 19.91
 4 7 0 116.45 21.65
 -4 -7 -1 71.85 17.64
 4 7 1 79.94 16.84
 4 7 2 27.9 10.04
 -4 -7 -2 22.64 10.97
 4 7 3 13.75 6.73
 -4 -7 -3 10.28 6.83
 4 7 4 18.11 8.45
 4 7 5 91.97 20.24
 4 7 5 84.88 19.63
 4 7 6 23.63 10.92
 4 7 6 8.92 7.66
 4 7 7 5.58 4.8
 4 7 7 -1.32 4.52
 4 7 8 -0.84 2.23
 4 7 8 -1.71 4.27
 4 7 9 -11.03 6.37
 4 7 9 -0.41 5.94
 4 7 10 0 5.78
 4 7 10 0.54 3.38
 4 7 11 49.08 13.92
 4 7 12 -0.03 4.97
 4 7 13 14.98 8.42
 4 7 14 -6.23 5.79
 4 7 15 8.51 10.02
 -4 -8 8 8.21 6.39
 4 8 -7 13.64 10.39
 -4 -8 7 26.15 10.48
 -4 -8 6 7.1 5.1
 4 8 -6 -14.67 8.08
 -4 -8 5 2.07 4.81
 4 8 -5 -3.41 1.37
 -4 -8 4 29.77 12.71
 4 8 -4 7.39 5
 -4 -8 3 157.4 27.41
 4 8 -3 118.4 23.23
 4 8 -2 27.85 12.41
 -4 -8 2 37.39 15.31
 4 8 -1 16.11 8.11
 -4 -8 1 6.36 6.2
 -4 -8 0 24 10.5
 4 8 0 7.87 5.77
 -4 -8 -1 20.69 11.55
 4 8 1 8.32 6.65
 -4 -8 -2 27.94 10.55
 4 8 2 29.49 11.53
 -4 -8 -3 12.84 10.07
 4 8 3 15.85 8.38
 -4 -8 -4 23.22 10.18
 4 8 4 14.87 7.81
 -4 -8 -5 1.83 3.93
 4 8 5 7.17 6.59
 4 8 6 -3.34 5.24
 4 8 7 -6.17 5.09
 4 8 7 -0.29 3.86
 4 8 8 -2.9 3.48
 4 8 8 -5.08 5.56
 4 8 9 -1.33 2.35
 4 8 9 -3.75 6.46
 4 8 10 0 2.07
 4 8 10 1.43 1.84
 4 8 11 0 4.79
 4 8 11 0 2.92
 4 8 12 6.52 7.01
 4 8 13 0 4.27
 4 9 -6 0.49 4.6
 -4 -9 5 8.58 7.51
 4 9 -5 1.8 7.15
 -4 -9 4 1.28 8.5
 4 9 -4 1.65 4.77
 -4 -9 3 11.32 8.49
 4 9 -2 39.34 15.98
 -4 -9 2 24.28 9.91
 -4 -9 1 17.17 9.2
 4 9 -1 18.15 11.23
 -4 -9 0 4.48 7.56
 4 9 0 15.47 7.79
 -4 -9 -1 44.34 14.69
 4 9 1 39.98 14.42
 -4 -9 -2 25.45 11.69
 4 9 2 30.72 12.34
 -4 -9 -3 6.27 6.62
 4 9 3 13.22 7.68
 -4 -9 -4 -6.12 5.08
 4 9 4 5.07 6.17
 -4 -9 -5 21.55 10.96
 4 9 5 12.28 9.24
 -4 -9 -6 52.47 16.29
 4 9 6 33.17 13.93
 4 9 7 9.21 6.56
 4 9 8 0 6.21
 4 9 8 1.37 2.56
 4 9 9 14.46 8.29
 4 9 9 7.2 6.79
 4 9 10 22.91 10.42
 4 9 10 3.6 6.1
 4 9 11 -10.59 7.06
 4 9 11 -5.38 5.53
 4 9 12 3.31 9.28
 4 10 -4 5.1 9.12
 4 10 -3 -9.87 7.47
 -4 -10 2 -1.03 2.53
 4 10 -2 -3.58 4.44
 -4 -10 1 22.18 15.05
 4 10 -1 9.73 11.22
 -4 -10 0 67 21.87
 4 10 0 46.95 18.18
 -4 -10 -1 12.67 9.83
 4 10 1 9.6 8.2
 -4 -10 -2 -12 8.36
 4 10 2 -3.28 4.11
 -4 -10 -3 2.41 2.08
 4 10 3 1.64 5.72
 -4 -10 -4 4.29 6.61
 4 10 4 9.75 8.69
 -4 -10 -5 28.06 14.92
 4 10 5 6.77 7.15
 -4 -10 -6 35.67 15.77
 4 10 6 9.7 9.49
 -4 -10 -7 0 10.88
 4 10 7 18.4 14.05
 -4 -10 -8 13.47 11.68
 4 10 8 18.24 9.82
 4 10 9 9.13 12.67
 4 10 10 58.15 21.99
 4 10 10 5.81 5.59
 4 10 11 6.09 5.7
 5 -6 -9 -5.25 5.45
 5 -6 -8 -12.93 8.38
 5 -6 -7 -5.95 5.74
 5 -6 -6 9.8 10.02
 5 -6 -6 6.37 5.56
 5 -6 -5 8.11 9.43
 5 -6 -5 -2.04 4.11
 5 -6 -4 11.51 8.84
 5 -6 -4 17.64 10.16
 5 -6 -3 3.3 5.15
 5 -6 -3 1.88 3.23
 5 -6 -2 7.43 6.21
 5 -6 -2 13.06 7.93
 5 -6 -1 12.88 8.98
 5 -6 -1 6.17 6.99
 5 -6 0 -3.4 4.65
 5 -6 0 6.56 7.89
 5 -6 1 8.18 7.8
 5 -6 1 16.61 9.62
 5 -6 2 27.45 16.76
 5 -6 2 26.33 12.05
 5 -6 3 0.3 7.27
 5 -6 3 -1.37 6.95
 5 -6 4 5.65 0.8
 5 -6 4 13.68 11.28
 5 -6 5 23.37 12.05
 5 -6 5 16.3 12.96
 5 -6 6 4.03 6.42
 5 -6 6 0.77 4.36
 5 -6 7 4.04 5.41
 5 -5 -10 1.94 5.72
 5 -5 -9 -3.29 4.27
 5 -5 -9 0.48 2.61
 5 -5 -8 3.25 4.11
 5 -5 -8 3.46 6.69
 5 -5 -7 38.3 13.8
 5 -5 -7 34.21 13.72
 5 -5 -6 0.29 1.43
 5 -5 -6 1.33 2.53
 5 -5 -5 59.7 19.09
 5 -5 -5 48.22 16.06
 5 -5 -4 45.39 15.6
 5 -5 -4 32.3 12.9
 5 -5 -3 -0.88 6.48
 5 -5 -3 -1.58 1.51
 5 -5 -2 2.23 2.38
 5 -5 -2 -2.59 5.12
 5 -5 -1 -1.12 1.62
 5 -5 -1 -0.96 5.99
 5 -5 0 53.35 16.53
 5 -5 0 41.23 13.56
 5 -5 1 15.94 6.81
 5 -5 1 28.68 12.88
 5 -5 2 4.7 2.55
 5 -5 2 -5.5 7.31
 5 -5 3 9.52 7.15
 5 -5 3 1.56 7.24
 5 -5 4 -6.42 7.11
 5 -5 4 -3.25 6
 5 -5 5 9.62 8.79
 5 -5 5 14.28 10.99
 5 -5 6 1.26 3.61
 5 -5 6 -1.49 4.17
 5 -5 7 1.28 2.54
 5 -4 -11 -8.98 6.1
 5 -4 -10 0.62 1.8
 5 -4 -9 2.41 1.37
 5 -4 -8 -10.57 7.29
 5 -4 -8 1.14 2.62
 5 -4 -7 10.71 7.23
 5 -4 -7 6.78 3.88
 5 -4 -6 -0.57 5.51
 5 -4 -6 -0.15 3.77
 5 -4 -5 11.25 7.22
 5 -4 -5 15.44 7.62
 5 -4 -4 9.13 7.15
 5 -4 -4 12.11 6.93
 5 -4 -3 13.82 7.22
 5 -4 -3 11.17 6.9
 5 -4 -2 2.42 1.14
 5 -4 -2 1.82 3.89
 5 -4 -1 0.06 2.4
 5 -4 -1 0.02 1.65
 5 -4 0 -1.53 4.52
 5 -4 0 -2.18 2.7
 5 -4 1 16.77 8.77
 5 -4 1 17.35 8.96
 5 -4 2 8.99 5.9
 5 -4 2 10.23 6.46
 5 -4 3 2.7 1.32
 5 -4 3 2.47 3.95
 5 -4 4 7.79 6.63
 5 -4 4 1.67 2.55
 5 -4 5 -6.42 7.59
 5 -4 5 11.16 6.34
 5 -4 6 16.04 9.84
 5 -4 6 5.73 5.92
 5 -4 7 2.98 5.62
 5 -3 -13 -1.75 3.53
 5 -3 -12 11.36 9.46
 5 -3 -11 13.21 9.22
 5 -3 -10 1.12 1.7
 5 -3 -9 -3.66 4.87
 5 -3 -8 4.04 3.22
 5 -3 -7 -4.99 2.38
 5 -3 -6 1.4 3.44
 5 -3 -5 0.39 4.13
 5 -3 -5 1.26 5.91
 5 -3 -4 3.86 0.34
 5 -3 -4 1.66 2.6
 5 -3 -3 74.59 17.8
 5 -3 -3 83.61 18.75
 5 -3 -2 -8.32 7.3
 5 -3 -2 2.39 3.51
 5 -3 -1 184.32 27.91
 5 -3 -1 190.95 28.57
 5 -3 0 147.5 24.41
 5 -3 0 143.8 24.39
 5 -3 1 24.24 10.07
 5 -3 1 21.17 9.19
 5 -3 2 7.49 0.99
 5 -3 2 4.85 3.51
 5 -3 3 155.19 24.62
 5 -3 3 152.59 25.92
 5 -3 4 29.82 12.35
 5 -3 4 37.16 11.29
 5 -3 5 2.73 4.17
 5 -3 6 8.93 6.41
 5 -3 7 1.22 2.36
 5 -3 7 3.88 5.14
 5 -3 8 0.02 2.26
 5 -3 9 2.29 4.1
 5 -3 10 -2.73 4.96
 5 -3 11 -2.63 3.66
 5 -3 12 -6.69 6.07
 -5 2 13 -6.21 5.91
 -5 2 12 -0.65 1.87
 5 -2 -12 0.29 1.05
 -5 2 11 13.55 10.21
 5 -2 -11 3.29 3.46
 -5 2 10 1.89 1.67
 5 -2 -10 0.21 3.63
 5 -2 -9 -2.49 3.17
 -5 2 9 2.24 1.13
 5 -2 -8 1.94 4.37
 -5 2 8 3.73 5.65
 5 -2 -7 14.83 7.58
 -5 2 7 17.61 8.56
 5 -2 -6 2.01 3.96
 -5 2 6 2.64 5.29
 5 -2 -5 2.98 2.37
 -5 2 5 1.8 3.87
 5 -2 -4 14.57 7.9
 -5 2 4 9.43 3.89
 5 -2 -3 12.11 6.8
 -5 2 3 15.06 6.08
 5 -2 -2 26.13 8.98
 -5 2 2 20.47 6.99
 5 -2 -1 36.35 11.33
 5 -2 0 -1.91 3.59
 5 -2 1 5.44 4.48
 5 -2 2 5.55 4.2
 5 -2 3 77.58 15.61
 5 -2 4 55.55 13.4
 5 -2 5 6.96 3.06
 5 -2 5 9.13 5.4
 5 -2 6 -0.84 2.23
 5 -2 6 0.22 2.49
 5 -2 7 17.77 7.32
 5 -2 7 17.36 6.57
 5 -2 8 2.58 2.58
 5 -2 9 1.96 0.46
 5 -2 10 1.87 4.78
 5 -2 11 37.62 13.65
 5 -2 12 -12.29 7.97
 5 -2 13 1.13 5.83
 -5 1 13 9.06 4.51
 -5 1 12 18.22 10.07
 -5 1 11 4.82 2.64
 5 -1 -10 6.94 5.91
 -5 1 10 10.83 9.58
 5 -1 -10 -1.27 4.79
 5 -1 -9 3.1 4.81
 -5 1 9 -0.58 3.71
 5 -1 -9 -2.41 4.91
 -5 1 8 125.7 22.9
 5 -1 -8 101.67 21.91
 -5 1 7 9.48 5.01
 5 -1 -7 10.84 8.18
 -5 1 6 72.23 16.7
 5 -1 -6 83.42 18.95
 5 -1 -5 52.83 14.32
 -5 1 5 49.92 14.72
 5 -1 -4 20.5 9.18
 -5 1 4 19.11 9.19
 -5 1 3 94.41 17.78
 5 -1 -3 80.49 17.15
 -5 1 2 125.98 19.67
 5 -1 -2 133.11 20.8
 -5 1 1 230.31 26.3
 5 -1 -1 240.4 28.28
 -5 1 0 130.43 17.85
 5 -1 0 137.92 21.14
 5 -1 1 13.17 5.6
 -5 1 -1 7.61 3.44
 -5 1 -2 140.48 18.31
 5 -1 2 133.52 19.75
 5 -1 3 158.35 21.44
 5 -1 4 -4.26 4.64
 5 -1 4 -3.32 3.82
 5 -1 5 111.88 16.32
 5 -1 5 127.6 18.99
 5 -1 6 28.11 8.44
 5 -1 6 19.77 7.27
 5 -1 7 9.04 5.22
 5 -1 7 11.77 6.75
 5 -1 8 59.37 14.16
 5 -1 9 2.38 3.26
 5 -1 9 -3.98 5.72
 5 -1 10 -4.97 4.45
 5 -1 11 23.55 9.85
 5 -1 12 1.18 1.79
 5 -1 13 15.38 5.42
 5 -1 14 2.02 3.15
 -5 0 13 -3.37 4.27
 -5 0 12 13.61 7.44
 -5 0 11 -3.39 3.45
 5 0 -10 7.25 4.55
 -5 0 10 8.89 6.83
 5 0 -9 27.98 10.3
 -5 0 9 21.37 8.34
 5 0 -8 9.09 5.14
 -5 0 8 9.12 6.82
 5 0 -7 82.53 16.9
 -5 0 7 71.97 16.36
 5 0 -7 71.99 17.41
 5 0 -6 60.69 14.12
 -5 0 6 49.98 13.59
 5 0 -6 54.21 15
 5 0 -5 50.36 12.69
 -5 0 5 39.49 11.5
 5 0 -5 35.09 11.45
 5 0 -4 29.63 10.89
 -5 0 4 30.68 10.03
 5 0 -3 2.63 3.42
 -5 0 3 -2 6.05
 5 0 -2 28.33 9.97
 -5 0 2 31.43 10.1
 5 0 -1 36.08 11.22
 -5 0 1 28.52 5.14
 -5 0 1 41.3 10.83
 -5 0 0 124.35 18.23
 5 0 0 130.1 18.81
 -5 0 -1 123.02 17.03
 5 0 1 145.68 19.7
 5 0 2 39.2 9.47
 -5 0 -2 31.98 7.96
 -5 0 -3 51.87 10.46
 5 0 3 52.99 11.68
 5 0 4 4.48 3.63
 -5 0 -4 5.58 4.3
 5 0 4 -0.39 1.7
 5 0 5 7 4.27
 5 0 5 5.35 2.28
 5 0 6 47.18 11.49
 5 0 6 58.17 11.23
 5 0 6 55.35 11.61
 5 0 7 -1.67 4.33
 5 0 7 -0.21 0.41
 5 0 8 2.34 3.86
 5 0 8 0.46 1.26
 5 0 9 31.13 11.09
 5 0 9 33.21 10.25
 5 0 10 50.13 13.09
 5 0 10 37.47 10.42
 5 0 11 9.26 5.39
 5 0 12 8.77 4.55
 5 0 13 10.49 6.72
 5 0 14 11.7 10.6
 5 0 15 0.17 6.35
 -5 -1 14 3.61 5.59
 -5 -1 13 2.75 7.53
 -5 -1 12 -5.96 5.4
 -5 -1 11 8.04 6.68
 -5 -1 10 2.77 3.66
 -5 -1 9 3.02 2.57
 5 1 -9 2.98 4.15
 -5 -1 8 11.03 6.18
 5 1 -8 6.93 3.67
 -5 -1 7 1.74 1.67
 5 1 -7 0.09 2.45
 -5 -1 6 18.91 10.09
 5 1 -6 12.82 5.36
 5 1 -5 1.41 3.27
 -5 -1 5 0.36 1.94
 -5 -1 4 60.22 10.12
 5 1 -4 53.73 13.37
 -5 -1 4 49.7 14.82
 5 1 -4 40.64 13.05
 -5 -1 3 19.06 4.47
 5 1 -3 37.35 11.62
 -5 -1 3 22.48 9.02
 5 1 -3 21.76 9.06
 -5 -1 2 36.04 7.63
 5 1 -2 45.13 12.38
 -5 -1 2 38.08 12.07
 5 1 -2 32.62 9.41
 -5 -1 1 65.94 12.84
 -5 -1 1 100.64 18.14
 5 1 -1 77.17 15.61
 5 1 0 473.35 36.91
 -5 -1 0 456.85 36.6
 5 1 0 443.2 35.66
 -5 -1 -1 9.57 6.11
 5 1 1 0.4 4.05
 5 1 2 -2.3 4.48
 -5 -1 -2 -3.18 4.27
 5 1 2 0.73 2.08
 5 1 3 29.39 8.24
 5 1 3 47.81 13.11
 -5 -1 -3 41.09 9.96
 5 1 4 222.2 26.16
 -5 -1 -4 238.15 21.72
 5 1 4 211.24 16.04
 5 1 4 186.23 21.67
 5 1 5 85.61 16.28
 -5 -1 -5 78.4 11.41
 5 1 5 80.88 11.63
 5 1 5 63.29 12.12
 5 1 6 69.79 14.4
 5 1 6 82.94 12.78
 5 1 6 64.43 11.32
 5 1 7 34.93 10.15
 5 1 7 36.91 9.19
 5 1 8 24.33 8.71
 5 1 8 27.37 8.38
 5 1 9 60.77 13.08
 5 1 9 71.95 14.17
 5 1 10 -3.31 4.57
 5 1 10 2.59 1.88
 5 1 11 -8.41 6.35
 5 1 12 2.09 4.32
 5 1 13 1.63 2.19
 5 1 14 -1.3 3.48
 5 1 15 -6.85 6.18
 -5 -2 13 1.01 2.39
 -5 -2 12 -11.08 7.87
 -5 -2 11 -4.82 5.45
 -5 -2 10 4.81 2.6
 -5 -2 9 9.22 6.92
 -5 -2 8 20.54 7.34
 -5 -2 8 9.47 3.95
 -5 -2 7 6.84 3.95
 -5 -2 7 1.53 2.33
 -5 -2 6 83.82 13.82
 5 2 -6 83.7 16.95
 -5 -2 6 79.82 18.5
 5 2 -5 6.96 5.88
 -5 -2 5 5.6 5.36
 5 2 -5 0.18 0.94
 -5 -2 4 139.95 17.37
 5 2 -4 138.36 21.09
 5 2 -4 134.3 21.19
 5 2 -3 53.87 13.41
 -5 -2 3 45.74 10.48
 5 2 -3 40.75 12.33
 5 2 -2 31.37 8.83
 -5 -2 2 28.6 7.86
 5 2 -2 24.76 7.95
 -5 -2 1 14.06 6.96
 5 2 -1 19.66 8.16
 5 2 0 106.63 17.75
 5 2 0 105.53 17.77
 5 2 1 67.33 16.5
 5 2 1 104.43 18.76
 5 2 2 208.39 24.72
 5 2 2 213.35 25.15
 5 2 3 45.12 15.1
 5 2 3 31.96 12.12
 5 2 3 -2.66 2.82
 5 2 4 174.6 22.36
 5 2 4 186.61 15.68
 5 2 4 212.97 25.31
 5 2 5 68.52 15.41
 5 2 5 48.08 12.92
 5 2 5 52.73 10.18
 5 2 6 73.32 14.67
 5 2 6 80.78 12.34
 5 2 6 94.49 17.17
 5 2 7 149.61 20.26
 5 2 7 166.43 19.17
 5 2 7 191.51 24.29
 5 2 8 -1.08 4.76
 5 2 8 1.37 3.49
 5 2 9 12.6 6.81
 5 2 10 2.82 1.69
 5 2 11 -2.58 1.58
 5 2 12 -3.05 3.9
 5 2 13 -0.49 3.39
 5 2 14 -2.41 5.32
 5 2 15 10.55 8.44
 5 2 16 0.6 1.83
 -5 -3 13 -0.62 2
 -5 -3 12 0 3.66
 -5 -3 11 -12.11 8.33
 -5 -3 10 19.41 8.95
 -5 -3 10 23.3 10.69
 -5 -3 9 14.64 9.41
 5 3 -8 10.88 6.92
 -5 -3 8 10.66 7.35
 5 3 -7 -0.6 3.94
 -5 -3 7 3.78 4.9
 5 3 -6 9.17 6.28
 -5 -3 6 9.45 4.13
 5 3 -5 29.13 9.66
 -5 -3 5 24.89 8.29
 5 3 -4 75.95 14.99
 -5 -3 4 83.37 15.2
 5 3 -3 14.29 9.02
 -5 -3 3 0.87 3.15
 5 3 -2 4.29 5.85
 -5 -3 2 0.21 4.69
 -5 -3 1 28.92 10.18
 5 3 -1 36.76 10.83
 -5 -3 0 58.75 13.71
 5 3 0 77.2 15.26
 5 3 0 93.68 16.94
 5 3 1 60.36 14.13
 5 3 1 84.35 16.26
 5 3 2 57.38 14.12
 5 3 2 84.95 16.47
 5 3 3 67.4 9.56
 5 3 3 122.49 20.61
 5 3 4 143.97 14.78
 5 3 4 181.24 23.73
 5 3 5 17.31 10.75
 5 3 5 8.24 4.95
 5 3 6 26.78 10.59
 5 3 6 15.97 6.1
 5 3 7 112.19 16.55
 5 3 7 112.75 18.46
 5 3 8 11.39 5.32
 5 3 8 9.51 3.93
 5 3 9 66.77 14.1
 5 3 9 51.71 11.58
 5 3 10 46.25 10.83
 5 3 10 45.58 12.01
 5 3 11 1.45 3.14
 5 3 12 -7.11 5.83
 5 3 13 -5.08 7.03
 5 3 14 6.2 6.05
 5 3 15 0 3.47
 5 3 16 5.5 9.88
 -5 -4 12 -6.26 7.75
 -5 -4 12 -5.36 5.69
 -5 -4 10 -5.22 5.7
 -5 -4 9 24.97 11.85
 5 4 -8 8.11 5.73
 -5 -4 8 13.88 7.16
 5 4 -7 -6.52 7.94
 -5 -4 7 -4.47 5.48
 -5 -4 6 31.25 10.93
 5 4 -6 24.59 8.89
 -5 -4 5 228.97 28.16
 5 4 -5 211.74 27.19
 -5 -4 4 27.76 10.56
 5 4 -4 42.32 13.01
 -5 -4 3 30.37 11.23
 5 4 -3 31.69 11.59
 -5 -4 2 4.35 5.98
 5 4 -2 7.23 6.02
 -5 -4 1 13.57 8.28
 5 4 -1 32.47 11.08
 -5 -4 0 39.8 12.03
 5 4 0 72.48 15.71
 -5 -4 -1 20.75 9.79
 5 4 1 49.01 13.72
 5 4 2 101.46 18.52
 5 4 3 315.36 31.83
 5 4 4 272.18 24.43
 5 4 4 337.13 33.41
 5 4 5 68.24 12.04
 5 4 5 122.26 21.29
 5 4 6 97.05 15.32
 5 4 6 125.17 20.84
 5 4 7 41.35 11.16
 5 4 7 37.15 10.83
 5 4 8 8.35 4.25
 5 4 8 14.19 5.84
 5 4 9 4.06 1.91
 5 4 9 -1.26 4.67
 5 4 10 2.82 1.27
 5 4 10 1.78 2.58
 5 4 11 5.64 4.81
 5 4 11 4.71 5.11
 5 4 12 -3.32 6.11
 5 4 13 5.63 4.72
 5 4 14 -0.97 3.27
 5 4 15 6.7 9.24
 5 4 16 5.98 13.32
 -5 -5 13 -10.49 7.93
 -5 -5 10 26.27 14.52
 -5 -5 9 1.14 5.05
 -5 -5 8 5.57 7.55
 5 5 -8 -0.91 3.14
 -5 -5 7 20.02 10.31
 5 5 -7 13.73 7.37
 -5 -5 6 33.8 12.32
 5 5 -6 26.57 9.57
 -5 -5 5 12.73 9.73
 5 5 -5 3.22 2.85
 -5 -5 4 72.38 15.64
 5 5 -4 65.8 14.65
 -5 -5 3 2.38 6.46
 5 5 -3 0.29 2.85
 -5 -5 2 15.45 9.02
 5 5 -2 25.35 10.44
 -5 -5 1 43.41 12.47
 5 5 -1 62.55 14.17
 -5 -5 0 49.31 15.42
 5 5 0 53.45 14.17
 -5 -5 -1 12.41 11.66
 5 5 1 23.62 10.11
 5 5 2 27.48 9.9
 5 5 3 61.43 14.33
 5 5 4 89.05 17.28
 5 5 4 71.81 13.65
 5 5 5 83.45 16.67
 5 5 5 36.07 9.55
 5 5 6 229.84 25.73
 5 5 6 250.94 28.96
 5 5 7 44.79 11.97
 5 5 7 34.33 9.04
 5 5 8 -1.88 4.25
 5 5 8 -1.73 1.25
 5 5 9 -2.6 4.49
 5 5 9 -0.61 4.67
 5 5 10 3.74 1.32
 5 5 10 6.07 2.72
 5 5 11 24.64 9.25
 5 5 11 21.98 8.75
 5 5 12 25.61 10.45
 5 5 13 21.24 10.32
 5 5 14 2.16 5.98
 5 5 15 11.55 10.14
 -5 -6 11 2.7 4.01
 -5 -6 10 8.2 9.25
 -5 -6 9 3.89 5.09
 -5 -6 8 0 2.73
 5 6 -8 10.22 8.4
 -5 -6 7 8.38 10.29
 5 6 -7 6.05 6.53
 -5 -6 6 12.31 8.71
 5 6 -6 8.13 5.49
 -5 -6 5 6.02 6.84
 5 6 -5 -2.8 6.02
 -5 -6 4 -3.39 3.7
 5 6 -4 -2.7 5.27
 -5 -6 3 29.36 11.54
 -5 -6 2 14.29 6.8
 -5 -6 1 19.06 12.92
 -5 -6 0 127.82 23.2
 -5 -6 -1 110.89 22.96
 -5 -6 -2 36.45 17.61
 5 6 5 7.9 6.3
 5 6 6 5.49 2.59
 5 6 7 9.04 4.82
 5 6 8 12.77 7.18
 5 6 8 7.04 5.84
 5 6 9 -3.05 4.13
 5 6 9 5.36 2.88
 5 6 10 7.29 5.27
 5 6 10 14.31 8.81
 5 6 11 3.58 5.01
 5 6 11 5.63 3.94
 5 6 12 0.63 6.97
 5 6 13 8.26 6.93
 5 6 14 9.69 8.87
 5 6 15 1.37 2.76
 -5 -7 9 23.61 16.55
 -5 -7 8 -0.41 1.55
 -5 -7 7 28.48 15.56
 5 7 -7 24.09 12.69
 -5 -7 6 5.91 7.19
 5 7 -6 15.33 9.01
 -5 -7 5 3.46 6.66
 -5 -7 4 0.71 4.17
 -5 -7 3 7.44 6.08
 -5 -7 2 45.54 13.27
 -5 -7 1 29.9 11.58
 -5 -7 0 51.76 15.1
 -5 -7 -1 42.74 15.1
 -5 -7 -2 73.36 17.94
 -5 -7 -3 29.52 14.15
 5 7 6 17.23 8.15
 5 7 7 0.35 4.57
 5 7 8 -0.55 2.5
 5 7 9 0.57 1.58
 5 7 10 8.29 5.49
 5 7 11 2.68 1.88
 5 7 11 -4.67 6.76
 5 7 12 11.58 7.05
 5 7 13 6.67 5.96
 5 7 14 4.34 8.9
 -5 -8 7 -13.1 11
 5 8 -7 -24.8 10.79
 -5 -8 6 6.46 8.7
 -5 -8 5 23.6 13.08
 -5 -8 4 32.55 14.59
 -5 -8 3 2.98 4.61
 -5 -8 2 9.86 8.33
 5 8 -2 11.91 8.57
 -5 -8 1 8.22 6.3
 5 8 -1 -1.52 1.34
 -5 -8 0 21.27 9.47
 5 8 0 30.94 11.7
 -5 -8 -1 32.42 12.84
 5 8 1 31.52 12.38
 -5 -8 -2 22.93 10.29
 5 8 2 24.03 10.43
 -5 -8 -3 12.95 10.45
 5 8 3 1.25 1.73
 -5 -8 -4 24.58 11.26
 5 8 4 24.92 11.5
 -5 -8 -5 3.34 5.57
 5 8 5 9.12 6.86
 5 8 6 6.02 5.74
 5 8 7 5.07 4.48
 5 8 7 3.76 5.87
 5 8 8 -4.49 4.57
 5 8 9 -0.02 1.55
 5 8 10 -2.39 5.84
 5 8 11 5.22 7.34
 5 8 12 1.46 4.09
 5 8 13 4.61 10.05
 5 9 -4 -14.93 9.31
 -5 -9 4 0 4.19
 -5 -9 3 -2.99 4.24
 5 9 -3 12.18 13.05
 -5 -9 2 0.01 5.42
 5 9 -2 -1.66 3.07
 -5 -9 1 21.68 13.09
 5 9 -1 21.84 12.46
 -5 -9 0 109.64 24.54
 5 9 0 89.75 23.09
 -5 -9 -1 41.49 18.46
 5 9 1 43.86 15.63
 -5 -9 -2 44.39 18.88
 5 9 2 18.44 10.14
 -5 -9 -3 67.12 19.87
 5 9 3 52.9 17.2
 -5 -9 -4 46.29 17.55
 5 9 4 27.21 13.03
 -5 -9 -5 21.28 14.69
 5 9 5 5.93 8.75
 -5 -9 -6 45.2 16.08
 5 9 6 30.28 15.29
 5 9 7 10.69 10.87
 5 9 8 0 5.57
 5 9 9 0 4.1
 5 9 9 2.58 3.85
 5 9 10 3.29 5.41
 5 9 11 5.85 10.73
 -5 -10 -2 9.46 9.37
 5 10 2 9.94 8.88
 -5 -10 -3 20.16 11.38
 5 10 3 5.63 6.7
 -5 -10 -4 18.28 10.61
 5 10 4 6.78 7.43
 5 10 5 0.06 4.05
 5 10 6 0 2.17
 6 -5 -2 21.05 10.19
 6 -5 -1 51.09 17.11
 6 -5 0 -3.08 8.09
 6 -5 1 4.47 6.03
 6 -5 2 7.99 8.27
 6 -5 3 -1.28 5.62
 6 -5 4 0.02 4.8
 6 -5 5 11.29 10.33
 6 -4 -6 10.28 10.3
 6 -4 -5 -1.49 6.78
 6 -4 -4 21.75 11.37
 6 -4 -3 23.05 10.26
 6 -4 -2 0.94 5.65
 6 -4 -1 7.1 8.47
 6 -4 0 -11.34 11.16
 6 -4 1 -6.79 7.13
 6 -4 2 0.43 2.62
 6 -4 3 -19.86 10.14
 6 -4 4 15.71 9.44
 6 -4 5 -4.41 4.72
 6 -3 -9 -3.42 6.15
 6 -3 -8 9.67 10
 6 -3 -7 -2.04 5.54
 6 -3 -6 7.62 3.99
 6 -3 -5 2.53 2.62
 6 -3 -4 3.44 3.2
 6 -3 -3 4.87 4.59
 6 -3 -2 5.94 6.69
 6 -3 -1 0.98 1.77
 6 -3 0 5.24 5.61
 6 -3 1 -7.44 7.33
 6 -3 2 -3.45 3.23
 6 -3 3 -2.29 4.55
 6 -3 4 4.21 5.9
 6 -3 5 -3.8 4.24
 6 -2 -10 10.25 7.94
 -6 2 10 -9.2 7.21
 6 -2 -10 17.35 12.95
 -6 2 9 5.15 4.74
 6 -2 -9 8.76 9.19
 6 -2 -8 1.13 7.04
 -6 2 8 -0.46 5.89
 6 -2 -7 0.53 1.76
 -6 2 7 -9.66 6.86
 6 -2 -6 -1.66 4.02
 -6 2 6 7.87 7.34
 6 -2 -5 1.88 2.63
 -6 2 5 1.42 4.04
 6 -2 -4 -1.96 0.75
 -6 2 4 -7.31 8.64
 6 -2 -3 14.96 8.24
 -6 2 3 7.08 4.31
 6 -2 -2 34.37 12.37
 6 -2 -1 -1.72 5.48
 6 -2 0 34.52 12.31
 6 -2 1 6.82 5.92
 6 -2 2 3.06 1.26
 6 -2 3 -5.36 8.16
 6 -2 4 6.45 4.8
 6 -2 5 14.01 6.49
 6 -1 -10 9.79 8.62
 -6 1 10 10.3 8.82
 6 -1 -9 -7.05 7.13
 -6 1 9 -8.3 6.75
 6 -1 -9 -1.12 2.83
 6 -1 -8 -6.88 7.57
 -6 1 8 2 4.12
 6 -1 -8 1.24 4.88
 6 -1 -7 1.96 3.46
 -6 1 7 -1.68 6.13
 6 -1 -7 0.87 3.39
 -6 1 6 1.61 5.17
 6 -1 -6 4.59 2.42
 6 -1 -5 -4.5 5.1
 -6 1 5 -3.01 6.75
 6 -1 -4 3 2.95
 -6 1 4 1.51 5.21
 6 -1 -3 0.78 1.05
 -6 1 3 8.49 6.82
 6 -1 -2 0.89 2.39
 -6 1 2 12.63 8.25
 6 -1 -1 20.02 9.02
 -6 1 1 19.43 9.21
 6 -1 0 45.62 13.22
 -6 1 0 42.69 11.94
 6 -1 1 14.15 6.12
 -6 1 -1 12.49 6.17
 6 -1 2 6.53 4.37
 6 -1 3 0.09 2.47
 6 -1 4 21.28 7.7
 6 -1 5 27.07 9.39
 6 -1 7 -2.63 3.26
 6 -1 8 9.88 8.35
 6 -1 9 16.99 9.18
 -6 0 11 4.11 4.8
 -6 0 10 -25.79 11.62
 6 0 -9 -1.78 2.74
 -6 0 9 0.25 2.66
 6 0 -8 5.92 6.71
 -6 0 8 -0.03 2.75
 6 0 -7 0.94 2.93
 -6 0 7 1.2 4.52
 6 0 -7 -3.9 5.5
 6 0 -6 54.8 15.21
 -6 0 6 39.51 12.57
 6 0 -6 34.28 11.93
 6 0 -5 25.87 9.35
 -6 0 5 21.49 9.67
 6 0 -5 19.17 8.8
 6 0 -4 -1.04 2.02
 -6 0 4 3.04 4.97
 6 0 -4 3.22 4.81
 6 0 -3 21.98 8.29
 -6 0 3 28.03 10.97
 6 0 -3 17.49 7.67
 6 0 -2 5.6 5.12
 6 0 -2 4.41 4.35
 -6 0 2 1.16 3.4
 6 0 -1 5.73 3.68
 6 0 -1 12.11 7.75
 -6 0 1 3.46 3.49
 6 0 0 34.86 10.81
 6 0 0 54.68 14.51
 -6 0 0 38.1 10.95
 6 0 1 20.47 7.63
 -6 0 -1 21.35 6.84
 6 0 2 131.14 22.51
 -6 0 -2 84.01 15.75
 6 0 2 98.24 18.03
 6 0 3 42.43 11.72
 6 0 3 58.15 14.6
 -6 0 -3 43.12 10.19
 6 0 4 2.21 2.68
 6 0 4 -0.11 3
 6 0 5 0.1 1.82
 6 0 5 -4.6 4.08
 6 0 6 5.35 4.77
 6 0 7 20.16 10.09
 6 0 8 12.89 7.24
 6 0 9 1.86 4.83
 -6 -1 11 6.96 7.73
 -6 -1 10 5.38 7.13
 -6 -1 9 -2.76 5.19
 6 1 -9 -3.89 4.84
 -6 -1 8 -0.22 2.65
 6 1 -8 7.53 4.59
 -6 -1 7 4.4 4.75
 6 1 -7 -4.39 4.23
 6 1 -6 6.34 5.58
 -6 -1 6 4.94 4.24
 6 1 -5 15.15 7.67
 -6 -1 5 7.3 2.09
 6 1 -4 42.27 13.95
 -6 -1 4 20.57 9.05
 6 1 -3 2.19 0.36
 -6 -1 3 7.19 5.57
 6 1 -3 2.34 3.83
 6 1 -2 18.32 7.76
 -6 -1 2 11.57 6.71
 6 1 -2 9.94 6.17
 6 1 -1 17.44 7.17
 -6 -1 1 22.56 10.38
 6 1 -1 13.09 6.84
 6 1 0 11.29 4.68
 -6 -1 0 10.37 6.1
 6 1 0 7.22 5.88
 6 1 1 3.92 2.6
 -6 -1 -1 1.93 4.4
 6 1 1 0.88 3.63
 -6 -1 -2 2.67 1.42
 6 1 2 4.48 4.33
 6 1 3 60.22 15.66
 -6 -1 -3 54.13 12.75
 6 1 3 46.82 12.58
 6 1 4 3.29 2.32
 6 1 4 2 3.01
 6 1 5 2.92 2.33
 6 1 5 1.09 2.05
 6 1 6 7.85 4.63
 6 1 7 -7.08 7.52
 6 1 8 2.88 2.57
 6 1 9 -0.12 3.97
 6 1 10 8.87 5.87
 -6 -2 11 6.74 6.37
 -6 -2 10 4.48 5.86
 -6 -2 9 19.84 11
 -6 -2 8 3.44 4.52
 -6 -2 7 5.15 3.63
 6 2 -7 1.47 0.32
 -6 -2 6 19.16 9.08
 6 2 -6 21.6 9.71
 -6 -2 5 76.6 20.27
 6 2 -5 64.41 16.01
 -6 -2 4 -2.75 5.14
 6 2 -4 2.69 3.57
 -6 -2 3 25.01 11.19
 6 2 -3 41.01 12.54
 6 2 -2 99.86 19.76
 -6 -2 2 68.87 17.45
 -6 -2 1 8.14 7.5
 6 2 -1 39 12.19
 -6 -2 0 101.28 16.93
 6 2 0 123.32 22.78
 -6 -2 0 74.45 16.68
 6 2 1 183.92 26.5
 -6 -2 -1 145.07 22.63
 6 2 1 206.89 28.1
 -6 -2 -2 6.85 8.01
 6 2 2 32.39 12.73
 -6 -2 -3 6.05 3.44
 6 2 3 9.03 7.7
 -6 -2 -4 12.7 6.49
 6 2 4 14.61 8.1
 6 2 5 10 4.98
 6 2 6 -0.25 2.62
 6 2 7 7.41 4.43
 6 2 8 5.47 5.51
 -6 -3 10 3.39 5.08
 -6 -3 9 -0.68 2.02
 -6 -3 8 3.11 1.64
 -6 -3 7 19.3 9.82
 6 3 -6 44.78 15.33
 6 3 -5 33.69 11.31
 6 3 -4 64.25 16.32
 -6 -3 3 172.71 21.96
 6 3 -3 170.26 25.93
 6 3 -2 46.14 14.37
 -6 -3 2 22.88 9.77
 6 3 -2 28.71 12.04
 6 3 -1 21.43 8.7
 -6 -3 1 9.73 8.58
 6 3 -1 9.96 6.11
 -6 -3 0 58.56 16.57
 6 3 0 109.95 20.81
 6 3 0 74.49 16.3
 -6 -3 -1 131.75 21.38
 6 3 1 148.39 23.73
 6 3 1 163.42 25.93
 6 3 2 45.58 15.55
 6 3 2 31.97 11.86
 6 3 3 30.02 10.93
 6 3 3 16.09 7.29
 6 3 4 25.34 10.74
 6 3 4 7.75 7.36
 6 3 5 65.41 15.19
 6 3 6 -3.39 4.92
 6 3 7 -2.3 5.07
 6 3 8 18.44 8.91
 -6 -4 10 -9.41 7.73
 6 4 -8 10.17 6.34
 6 4 -7 -13.49 9.94
 6 4 -6 10.73 7.85
 -6 -4 6 26.9 11.58
 6 4 -5 7.46 5.47
 -6 -4 5 21.93 10.45
 6 4 -4 1.41 4.47
 -6 -4 4 -3.26 2.29
 6 4 -3 5.01 4.91
 -6 -4 3 10.55 6.26
 6 4 -2 -0.27 3.04
 -6 -4 2 2.89 5.41
 6 4 -1 -6.36 6.13
 -6 -4 1 11.54 8.33
 6 4 0 2.3 1.19
 -6 -4 0 -2.15 2.6
 -6 -4 -1 41.18 15.08
 6 4 1 49.58 12.89
 6 4 2 130.88 22.36
 6 4 3 103.03 20.85
 6 4 4 141.62 23.99
 6 4 5 19.61 9.21
 6 4 6 5.43 5.91
 6 4 7 10.04 7.05
 6 4 8 23.63 9.57
 6 4 9 20.19 8.31
 6 4 10 4.19 4.61
 6 4 11 11.7 7.46
 6 5 -8 7.48 5.56
 -6 -5 8 47.19 16.68
 6 5 -7 1.61 5.69
 -6 -5 7 17.88 11.76
 6 5 -6 4.89 4.63
 -6 -5 6 10.74 8.19
 -6 -5 5 24.02 12.24
 6 5 -5 11.26 9.41
 -6 -5 4 12.47 9.37
 6 5 -4 -8.82 9.23
 -6 -5 3 33.68 11.66
 6 5 -3 42.12 12.39
 -6 -5 2 3.92 6.47
 6 5 -2 0.31 3.97
 -6 -5 1 8.53 9.65
 6 5 -1 10.65 5.67
 -6 -5 0 35.23 12.11
 6 5 0 36.62 12.51
 -6 -5 -1 18.51 12.16
 6 5 1 21.37 9.05
 -6 -5 -2 26.9 11.69
 6 5 2 25.78 9.24
 6 5 3 44.33 13.13
 6 5 4 80.45 18.91
 6 5 5 28.27 10.17
 6 5 6 -2.06 3.24
 6 5 7 29.73 10.86
 6 5 8 -2.3 4.41
 6 5 9 28.79 10.76
 6 5 10 55.18 15.37
 6 5 11 15.6 7.91
 -6 -6 10 15.8 12.27
 -6 -6 9 3.17 5.86
 -6 -6 8 -4.15 8.25
 -6 -6 7 -17.83 12.58
 -6 -6 6 55.78 20.19
 6 6 -6 10.69 7.16
 -6 -6 5 8.32 7.21
 6 6 -5 -2.75 4.46
 -6 -6 4 24.88 13.11
 6 6 -4 -3.73 4.72
 -6 -6 3 26.96 15.31
 6 6 -3 11.33 7.63
 -6 -6 2 14.49 8.34
 6 6 -2 32.43 13.2
 -6 -6 1 -3.48 5.86
 6 6 -1 19.25 9.36
 -6 -6 0 2.27 1.28
 6 6 0 11.55 8
 -6 -6 -1 -12.6 10.13
 6 6 1 2.54 3.34
 -6 -6 -2 -0.69 7.49
 6 6 2 13.44 8.06
 -6 -6 -3 10.81 8.6
 6 6 3 16.03 9.53
 6 6 4 5.27 5.14
 6 6 5 8.59 6.77
 6 6 6 10.67 6.79
 6 6 7 1.14 4.73
 6 6 8 -5.92 5.14
 6 6 9 14.64 8.34
 6 6 10 1.67 3.02
 6 6 11 4.46 4.84
 -6 -7 8 -7.05 6.53
 -6 -7 7 3.72 8.02
 6 7 -7 -5.52 5.4
 -6 -7 6 6.6 6.21
 6 7 -6 19.83 9.98
 -6 -7 5 4.89 5.35
 6 7 -5 -11.96 7.54
 -6 -7 4 2.39 3.54
 6 7 -4 -1.32 2.48
 -6 -7 3 -2.47 3.56
 6 7 -3 -8.91 6.41
 -6 -7 2 -4.42 4.74
 6 7 -2 5.97 6.94
 -6 -7 1 -18.59 9.52
 6 7 -1 -3.49 4.01
 -6 -7 0 -8.93 6.7
 6 7 0 16.36 8.23
 -6 -7 -1 5.34 3.06
 6 7 1 16.96 10.01
 -6 -7 -2 4.88 3.21
 6 7 2 0.14 4.15
 -6 -7 -3 -11.37 7.68
 6 7 3 1.47 1.09
 -6 -7 -4 -17.19 9.53
 6 7 4 -2.46 1.21
 6 7 5 2.54 6.82
 6 7 6 0 5.28
 6 7 7 3.1 3.16
 6 7 8 3.56 7.76
 6 7 9 0 2.51
 6 7 10 8.5 7.32
 6 7 11 5.23 6.63
 6 8 -6 5.83 8.38
 -6 -8 5 47.31 22.73
 6 8 -5 2.74 3.74
 -6 -8 4 16.7 14.4
 6 8 -4 12.41 10.8
 -6 -8 3 0 2.97
 6 8 -3 -6.93 5.97
 -6 -8 2 6.84 7.85
 6 8 -2 0 4.49
 -6 -8 1 9.3 8.17
 -6 -8 0 0.14 0.86
 -6 -8 -1 0 3.79
 -6 -8 -2 -1.85 3.2
 -6 -8 -3 10.9 10.81
 -6 -8 -4 20.73 13.94
 -6 -8 -5 13.4 12.67
 6 8 7 -4.16 4.57
 6 8 8 16.66 11.2
 6 8 9 8.93 6.68
 6 8 10 2.31 6.93
 6 8 11 -2.96 3.8
 -6 -9 1 7.39 7.98
 -6 -9 0 7.27 7.85
 -6 -9 -1 13.4 10.45
 -6 -9 -2 8.42 10.15
 -6 -9 -3 16.82 11.9
 -6 -9 -4 26.37 15.5
 -6 -9 -5 23.34 12.92
 7 -3 -2 1.83 7.23
 7 -3 -1 -0.38 0.7
 7 -3 0 -1.36 6.21
 7 -3 1 -2.7 6.15
 7 -3 2 1.51 0.85
 7 -3 3 -1.61 2.89
 7 -2 -7 -12.89 8.48
 7 -2 -5 5.11 9.1
 7 -2 -4 7.52 4.55
 7 -2 -3 1.82 3.41
 7 -2 -2 -5.99 7.44
 7 -2 -1 6.88 7.21
 7 -2 0 0.65 2.94
 7 -2 1 -1.85 3.9
 7 -2 2 26.82 12.42
 7 -2 3 2.24 4.56
 7 -2 7 8.43 11.91
 7 -2 8 26.55 15.54
 7 -1 -9 -8.2 6.69
 7 -1 -8 -10.55 7.54
 7 -1 -7 0 1.79
 -7 1 7 -21.89 11.27
 7 -1 -6 0.64 1.83
 -7 1 6 0 2.19
 7 -1 -6 -8.46 8.45
 7 -1 -5 0 5.64
 -7 1 5 -6.65 5.7
 7 -1 -5 -5.41 5.94
 7 -1 -4 -4.19 4.63
 -7 1 4 4.18 4.59
 7 -1 -4 4.34 6.28
 7 -1 -3 3.65 5.7
 7 -1 -3 2.83 5.34
 -7 1 3 -3.78 4.26
 7 -1 -2 -5.78 8.26
 7 -1 -2 6.34 6.74
 -7 1 2 7.04 7.4
 7 -1 -1 -3.53 5.89
 -7 1 1 -12.64 7.33
 7 -1 0 13.95 9.4
 -7 1 0 11.56 10.06
 7 -1 1 0.41 1.42
 7 -1 2 2.93 3.4
 7 -1 3 1.69 3.31
 7 -1 3 17.34 12.29
 7 -1 4 32.57 14.09
 7 -1 5 2.83 6.11
 7 -1 6 -10.86 7.36
 7 -1 7 -5.24 5.12
 7 -1 8 29.59 14.65
 7 -1 9 -18.34 9.69
 7 0 -9 -21.03 10.57
 7 0 -8 4.45 4.8
 7 0 -7 0 6.15
 -7 0 7 4.92 10.33
 7 0 -6 0 4
 -7 0 6 -10.17 8.09
 7 0 -5 -11.17 7.48
 -7 0 5 -1.54 2.73
 7 0 -4 -4.98 4.95
 -7 0 4 0.01 3.18
 7 0 -4 3.51 6.16
 7 0 -3 -7.48 6.04
 -7 0 3 -0.87 1.95
 7 0 -2 -5.69 5.83
 -7 0 2 -8.33 7.65
 7 0 -2 2.03 2.96
 7 0 -1 5.49 7.63
 -7 0 1 -2.89 8.01
 7 0 -1 -9.88 11.15
 7 0 0 2.56 6.54
 -7 0 0 -1.17 3.25
 7 0 0 -4.33 4.17
 7 0 1 -1.8 2.69
 -7 0 -1 4.39 6.42
 7 0 1 -0.24 0.39
 7 0 2 0 4
 7 0 2 8.35 7.62
 7 0 3 -6.31 6.29
 7 0 3 1.78 3.05
 7 0 4 19.16 11.83
 7 0 5 -11.72 7.5
 7 0 6 -2.96 3.79
 7 0 7 -7.38 6.03
 7 0 8 12.54 9.69
 7 0 9 2.74 5.94
 7 1 -9 -16.72 8.9
 -7 -1 8 -2.49 3.66
 7 1 -8 -7.07 5.78
 -7 -1 7 4.04 6.48
 7 1 -7 -3.42 6.41
 -7 -1 6 4.63 4.88
 7 1 -6 0 1.85
 7 1 -5 -10.79 7.29
 -7 -1 5 -3.63 4.21
 7 1 -4 -3.62 4.18
 -7 -1 4 -6.55 5.6
 7 1 -3 2 3.11
 -7 -1 3 -0.1 4.29
 7 1 -2 0 4.14
 -7 -1 2 3.11 6.53
 7 1 -1 33.01 12.11
 -7 -1 1 9.78 7.78
 7 1 -1 16.39 10.09
 -7 -1 0 0.88 2.89
 7 1 0 0.98 2.3
 -7 -1 -1 -7.88 9.05
 7 1 1 -13.34 7.19
 -7 -1 -2 7.74 3.96
 7 1 2 5.26 4.67
 7 1 3 7.28 6.79
 7 1 3 6.51 5.32
 7 1 4 7.37 7.49
 7 1 5 -2.65 3.51
 7 1 6 0 3.46
 7 1 7 0 1.49
 7 1 8 -6.2 5.29
 7 1 9 -14.18 7.92
 -7 -2 8 13.95 11.05
 -7 -2 7 2.43 3.81
 7 2 -7 2.29 3.25
 -7 -2 6 0.04 3.51
 7 2 -6 0 3.99
 -7 -2 5 7.19 9.4
 7 2 -5 -3.74 4.11
 -7 -2 4 -0.29 5.69
 7 2 -4 -6.27 5.3
 -7 -2 3 8.21 5.04
 7 2 -3 17.56 11.14
 -7 -2 2 -0.21 3.3
 7 2 -2 6.34 7.37
 -7 -2 1 -17.78 9.5
 7 2 -1 22.73 11.67
 -7 -2 0 -0.67 3.37
 7 2 0 5.94 5.73
 -7 -2 -1 13.55 11.46
 7 2 1 9.84 7.14
 -7 -2 -2 3.33 2.51
 7 2 2 1.28 3.76
 7 2 3 4.45 5.76
 7 2 4 9.22 7.46
 7 2 5 2.63 7.04
 7 2 6 -2.61 3.34
 7 2 7 2.25 5.95
 7 2 8 0.06 0.51
 -7 -3 7 1.91 6.47
 -7 -3 6 13.63 9.67
 -7 -3 5 25.47 11.89
 -7 -3 4 4.15 7.15
 -7 -3 3 0.05 5
 -7 -3 2 21.35 9.36
 -7 -3 1 18.04 10.75
 7 3 -1 28.42 12
 7 3 0 32.65 13.55
 -7 -3 0 7.57 8.02
 7 3 0 21.54 9.91
 7 3 1 23.18 10.17
 -7 -3 -1 -4.12 8
 7 3 1 15.29 8.38
 7 3 2 -3.58 6.07
 -7 -3 -2 4.19 3.78
 7 3 2 -1.57 3.79
 7 3 3 3.93 0.43
 -7 -3 -3 2.5 4.49
 7 3 3 1.72 2.4
 -7 -4 7 2.61 3.18
 -7 -4 6 17.51 12.15
 7 4 -5 2.29 3.87
 7 4 -4 0 0.46
 7 4 -3 29.15 13.47
 7 4 -2 11.05 8.97
 7 4 -1 25.37 11.07
 7 4 0 26.93 11.65
 7 4 1 25.55 11.59
 7 4 2 7.24 6.26
 -7 -4 -2 4.27 6.49
 7 4 3 -5.79 5.68
 7 4 4 -1.34 5
 7 4 5 12.71 8.8
 7 4 6 26.58 14.1
 7 4 7 0 6.23
 7 4 8 7.19 8.46
 7 5 -7 2.62 8.84
 7 5 -6 8.25 8.78
 7 5 -5 4.81 4.71
 7 5 -4 0 3.83
 7 5 -3 -7.32 6.01
 7 5 -2 7.16 8.63
 7 5 -1 6.74 8.79
 -7 -5 1 4.75 5.19
 7 5 0 0.13 5.09
 -7 -5 0 -15.67 10.4
 7 5 1 -2.95 6.47
 -7 -5 -1 -8.01 8.81
 7 5 2 13.02 8.38
 -7 -5 -2 -2.31 5.12
 7 5 3 2.22 3.14
 -7 -5 -3 21.42 11.74
 7 5 4 -1.13 5.62
 7 5 5 14.42 10.57
 7 5 6 25.66 12.66
 7 5 7 1.38 6.99
 7 5 8 17.21 11.56
 7 5 9 0 3.75
 7 5 10 4.15 7.85
 7 6 -7 -7.49 6.37
 7 6 -6 8.06 11.41
 7 6 -5 -8.57 6.73
 7 6 -4 0 5.1
 -7 -6 4 7.1 7.67
 -7 -6 3 4.19 5.62
 7 6 -3 0.72 1.98
 7 6 -2 -0.6 1.81
 -7 -6 1 16.9 9.01
 7 6 -1 2.46 4.18
 -7 -6 0 -9.96 8.19
 7 6 0 1.84 3.99
 -7 -6 -1 -12.83 9.96
 7 6 1 10.64 10.17
 -7 -6 -2 4.27 5.48
 7 6 2 9.65 9.7
 -7 -6 -3 4.93 7.06
 7 6 3 23.15 10.85
 -7 -6 -4 15.45 9.29
 7 6 4 38.47 14.67
 7 6 5 11.34 8.71
 7 6 6 14.94 8.95
 7 6 7 24.53 14.32
 7 6 8 31.46 14.96
 7 6 9 -9.37 7
 7 6 10 -3.99 4.52
 7 6 11 0.67 1.16
 -7 -7 5 -11.82 8.64
 -7 -7 4 -19.09 10.53
 7 7 -4 0 7.87
 -7 -7 3 0.18 4.08
 7 7 -3 6.67 6.28
 -7 -7 2 -6.97 8.41
 7 7 -2 -17.91 10.3
 -7 -7 1 26.83 15.31
 7 7 -1 15.72 12.88
 -7 -7 0 -3.65 4.91
 7 7 0 0 7.94
 -7 -7 -1 -14.92 9.07
 7 7 1 2.71 6.46
 -7 -7 -2 -4.45 4.95
 7 7 2 6.61 8.96
 -7 -7 -3 -3.19 4.25
 7 7 3 18.42 10.1
 -7 -7 -4 -10.18 7.7
 7 7 4 -9.84 7.38
 -7 -7 -5 -10.09 7.74
 7 7 5 6.62 6.17
 7 7 6 -2.52 3.81
 7 7 7 -3.49 4.5
 7 7 8 0 4.46
 7 7 9 -3.09 4.23
 -7 -8 2 3.98 7.27
 -7 -8 1 0 5.24
 -7 -8 0 0 3.59
 -7 -8 -1 -10.57 7.98
 -7 -8 -2 4.56 5.25
 -7 -8 -3 11.89 13.14
 -7 -8 -4 -30.09 13.79
 -7 -8 -5 -32.17 14.45
 -8 1 3 1.38 5.58
 8 -1 0 -0.44 1.69
 8 -1 1 -1.91 3.28
 -8 0 3 -7.02 6.3
 -8 0 2 -17.26 9.61
 8 0 -2 8.2 8.82
 -8 0 1 -0.68 7.54
 8 0 -1 0.5 4.49
 8 0 0 -1.14 4.84
 8 0 1 3.06 4.77
 -8 -1 4 7.89 6.51
 -8 -1 3 0.76 1.97
 -8 -1 2 5.08 6.07
 -8 -2 4 -6.78 10.84
 -8 -2 3 -8.53 11.08
 -8 -2 2 12.66 10.57
 8 2 -2 4.14 5.59
 8 2 -1 18.26 12.97
 -8 -2 0 7.49 5.08
 8 2 0 39.44 15.74
 8 2 1 5.19 9.36
 8 2 2 -3.89 4.53
 8 2 3 0 7.57
 8 2 4 4.68 4.93
 8 2 5 -0.8 2.05
 -8 -3 3 17.31 16.35
 -8 -3 2 -8.59 7.48
 -8 -3 1 9.4 12.83
 -8 -3 0 -13.36 8.91
 -8 -3 -1 -1.57 5.94
 -8 -4 2 1.04 2.5
 -8 -4 1 -1.46 2.9
 -8 -4 0 4.05 4.72
 -8 -4 -1 5.06 8.77
 -8 -7 -3 -12.24 8.6
 -8 -7 -4 0 4.59

_iucr_refine_instructions_details
;
TITL exp_188_a.res in P-1
    exp_188.res
    created by SHELXL-2018/3 at 12:24:49 on 14-Oct-2022
REM Old TITL exp_188 in P-1
REM SHELXT solution in P-1: R1 0.257, Rweak 0.026, Alpha 0.046
REM <I/s> 0.000 for 0 systematic absences, Orientation as input
REM Formula found by SHELXT: C13 N O6
CELL 0.71073 6.029 8.1542 13.4778 79.481 86.443 75.029
ZERR 2 0.0007 0.001 0.0017 0.01 0.01 0.01
LATT 1
SFAC C H F N O
UNIT 26 24 6 2 6

L.S. 10
PLAN  5
SIZE 0.41 0.29 0.17
TEMP 22(2)
CONF
list 4
fmap 2 53
MORE -1
ACTA
BOND $H
HTAB
OMIT 3 5 2
OMIT 4 -5 8
OMIT 2 2 14
OMIT 4 3 15
OMIT -2 5 15
REM <olex2.extras>
REM <HklSrc "%.\\exp_188.hkl">
REM </olex2.extras>

WGHT    0.090500    0.037900
EXTI    0.050223
FVAR       1.42312
O4    5    0.588162    0.438656    0.145801    11.00000    0.04568    0.04542 =
         0.05488   -0.01102    0.00433   -0.00951
O2    5    0.321884    0.965509    0.085103    11.00000    0.06697    0.04127 =
         0.05862    0.00841   -0.00651   -0.02564
O1    5   -0.016273    0.788414    0.050797    11.00000    0.06126    0.04301 =
         0.06343    0.00399   -0.02098   -0.01118
F1    3    0.027387    0.827331    0.309049    11.00000    0.11649    0.07059 =
         0.07384   -0.01585    0.03724   -0.02848
F2    3    0.211487    1.023433    0.283612    11.00000    0.11890    0.05956 =
         0.07981   -0.03059   -0.00566   -0.02166
N1    4    0.212222    0.565535    0.157181    11.00000    0.04002    0.03373 =
         0.04972   -0.00285   -0.00862   -0.00795
F3    3   -0.078514    1.049670    0.194331    11.00000    0.08254    0.07127 =
         0.10271   -0.02341   -0.00979    0.02801
C8    1    0.130128    0.731747    0.116177    11.00000    0.03731    0.03438 =
         0.04631    0.00075   -0.00663   -0.00548
C5    1    0.426400    0.532647    0.210034    11.00000    0.03828    0.03388 =
         0.04540   -0.00531   -0.00451   -0.00861
C7    1    0.256003    0.842471    0.160351    11.00000    0.04965    0.03014 =
         0.04769    0.00190   -0.00381   -0.01417
C9    1    0.424846    0.423907    0.314148    11.00000    0.05182    0.03536 =
         0.04856   -0.00290   -0.00823   -0.01087
C6    1    0.468855    0.712969    0.207922    11.00000    0.04983    0.03888 =
         0.05752   -0.00381   -0.01322   -0.01508
AFIX  23
H6A   2    0.488659    0.730585    0.275748    11.00000   -1.20000
H6B   2    0.605146    0.724684    0.167988    11.00000   -1.20000
AFIX   0
C2    1    0.222230    0.420737    0.104758    11.00000    0.06317    0.03558 =
         0.06455   -0.00999   -0.01357   -0.01673
AFIX  23
H2A   2    0.182704    0.460793    0.034258    11.00000   -1.20000
H2B   2    0.120571    0.351033    0.136566    11.00000   -1.20000
AFIX   0
C1    1    0.103965    0.936443    0.236799    11.00000    0.07076    0.03849 =
         0.06064   -0.00608   -0.00148   -0.00845
C3    1    0.472212    0.321516    0.116293    11.00000    0.06510    0.04326 =
         0.06079   -0.01765   -0.00202   -0.01033
AFIX  23
H3A   2    0.487759    0.219061    0.167554    11.00000   -1.20000
H3B   2    0.535199    0.287296    0.053035    11.00000   -1.20000
AFIX   0
C10   1    0.224820    0.418165    0.368607    11.00000    0.06172    0.05032 =
         0.06106    0.00281    0.00834   -0.01184
AFIX  43
H10   2    0.084932    0.482242    0.340789    11.00000   -1.20000
AFIX   0
C14   1    0.627923    0.326150    0.357664    11.00000    0.06040    0.06940 =
         0.06549    0.00993   -0.01853   -0.01042
AFIX  43
H14   2    0.765711    0.327219    0.322789    11.00000   -1.20000
AFIX   0
C12   1    0.427699    0.223885    0.505219    11.00000    0.12941    0.06416 =
         0.04788    0.01011   -0.01575   -0.03472
AFIX  43
H12   2    0.427688    0.157249    0.569060    11.00000   -1.20000
AFIX   0
C11   1    0.227823    0.320232    0.462656    11.00000    0.09734    0.06317 =
         0.05847    0.00420    0.01684   -0.02210
AFIX  43
H11   2    0.090316    0.319860    0.497904    11.00000   -1.20000
AFIX   0
C13   1    0.630293    0.225448    0.453306    11.00000    0.10634    0.07680 =
         0.07687    0.01753   -0.05021   -0.01606
AFIX  43
H13   2    0.768740    0.159625    0.481752    11.00000   -1.20000
AFIX   0
H2    2    0.204088    1.021582    0.036240    11.00000    0.10247
HKLF 4


REM  exp_188_a.res in P-1
REM wR2 = 0.2335, GooF = S = 1.015, Restrained GooF = 1.015 for all data
REM R1 = 0.0702 for 1620 Fo > 4sig(Fo) and 0.1428 for all 3339 data
REM 186 parameters refined using 0 restraints

END  
     
WGHT      0.0876      0.0314 

REM Instructions for potential hydrogen bonds
EQIV $1 x+1, y-1, z
HTAB C3 F3_$1
EQIV $2 -x, -y+2, -z
HTAB O2 O1_$2

REM Highest difference peak  0.256,  deepest hole -0.240,  1-sigma level  0.059
Q1    1  -0.1445  0.9529  0.2442  11.00000  0.05    0.25
Q2    1   0.3619  0.4427  0.2791  11.00000  0.05    0.21
Q3    1   0.4193  0.4865  0.2220  11.00000  0.05    0.21
Q4    1   0.7928  0.4709  0.1201  11.00000  0.05    0.21
Q5    1   0.5694  0.2026  0.4218  11.00000  0.05    0.19

  REM The information below was added by Olex2.
  REM
  REM R1 = 0.0702 for 1620 Fo > 4sig(Fo) and 0.1428 for all 5487 data
  REM 186 parameters refined using n/a restraints
  REM Highest difference peak 0.26, deepest hole -0.24
  REM Mean Shift 0, Max Shift 0.000.

  REM +++ Tabular Listing of Refinement Information +++
  REM R1_all = 0.1428
  REM R1_gt = 0.0702
  REM wR_ref = 0.2335
  REM GOOF = 1.015
  REM Shift_max = 0.000
  REM Shift_mean = 0
  REM Reflections_all = 5487
  REM Reflections_gt = 1620
  REM Parameters = 186
  REM Hole = -0.24
  REM Peak = 0.26
  REM Flack = n/a

  
;
_olex2_submission_special_instructions  'No special instructions were received'
_oxdiff_exptl_absorpt_empirical_details
;
Empirical correction (ABSPACK) includes:
- Absorption correction using spherical harmonics
- Frame scaling
;
