# Supplementary material for: Multicomponent Domino Cyclization of Ethyl Trifluoropyruvate with Methyl Ketones and Amino Alcohols as A New Way to γ-Lactam Annulated Oxazacycles
Source: Molecules. 2023 Feb 20;28(4):1983. doi: 10.3390/molecules28041983 (PMC9967980; doi:10.3390/molecules28041983)
Supplement: Supplementary file 1 [file molecules-28-01983-s001.zip › Supporting informations/5tc.cif]

data_exp_185
_audit_creation_date               2022-10-13
_audit_creation_method
;
Olex2 1.3
(compiled 2020.11.12 svn.r5f609507 for OlexSys, GUI svn.r6408)
;
_shelx_SHELXL_version_number       '2018/3'
_audit_contact_author_address      ?
_audit_contact_author_email        ?
_audit_contact_author_name         ''
_audit_contact_author_phone        ?
_publ_contact_author_id_orcid      ?
_publ_section_references
;
Dolomanov, O.V., Bourhis, L.J., Gildea, R.J, Howard, J.A.K. & Puschmann, H.
 (2009), J. Appl. Cryst. 42, 339-341.

Sheldrick, G.M. (2015). Acta Cryst. A71, 3-8.

Sheldrick, G.M. (2015). Acta Cryst. C71, 3-8.
;
_chemical_name_common              ?
_chemical_name_systematic          ?
_chemical_formula_moiety           'C13 H15 F6 N O6'
_chemical_formula_sum              'C13 H15 F6 N O6'
_chemical_formula_weight           395.26
_chemical_melting_point            ?
loop_
  _atom_type_symbol
  _atom_type_description
  _atom_type_scat_dispersion_real
  _atom_type_scat_dispersion_imag
  _atom_type_scat_source
 'C' 'C' 0.0033 0.0016 'International Tables Vol C Tables 4.2.6.8 and 6.1.1.4'
 'H' 'H' 0.0000 0.0000 'International Tables Vol C Tables 4.2.6.8 and 6.1.1.4'
 'F' 'F' 0.0171 0.0103 'International Tables Vol C Tables 4.2.6.8 and 6.1.1.4'
 'N' 'N' 0.0061 0.0033 'International Tables Vol C Tables 4.2.6.8 and 6.1.1.4'
 'O' 'O' 0.0106 0.0060 'International Tables Vol C Tables 4.2.6.8 and 6.1.1.4'

_shelx_space_group_comment
;
The symmetry employed for this shelxl refinement is uniquely defined
by the following loop, which should always be used as a source of
symmetry information in preference to the above space-group names.
They are only intended as comments.
;
_space_group_crystal_system        'monoclinic'
_space_group_IT_number             14
_space_group_name_H-M_alt          'P 1 21/n 1'
_space_group_name_Hall             '-P 2yn'
loop_
  _space_group_symop_operation_xyz
 'x, y, z'
 '-x+1/2, y+1/2, -z+1/2'
 '-x, -y, -z'
 'x-1/2, -y-1/2, z-1/2'

_cell_length_a                     10.8844(8)
_cell_length_b                     13.1919(9)
_cell_length_c                     11.3734(9)
_cell_angle_alpha                  90
_cell_angle_beta                   92.641(7)
_cell_angle_gamma                  90
_cell_volume                       1631.3(2)
_cell_formula_units_Z              4
_cell_measurement_reflns_used      2628
_cell_measurement_temperature      295(2)
_cell_measurement_theta_max        27.2220
_cell_measurement_theta_min        3.7520
_shelx_estimated_absorpt_T_max     0.979
_shelx_estimated_absorpt_T_min     0.928
_exptl_absorpt_coefficient_mu      0.167
_exptl_absorpt_correction_T_max    1.00000
_exptl_absorpt_correction_T_min    0.67901
_exptl_absorpt_correction_type     multi-scan
_exptl_absorpt_process_details
;
CrysAlisPro 1.171.41.123a (Rigaku Oxford Diffraction, 2022)
Empirical absorption correction using spherical harmonics,
implemented in SCALE3 ABSPACK scaling algorithm.
;
_exptl_absorpt_special_details     ?
_exptl_crystal_colour              colourless
_exptl_crystal_colour_primary      colourless
_exptl_crystal_density_diffrn      1.609
_exptl_crystal_density_meas        ?
_exptl_crystal_density_method      ?
_exptl_crystal_description         block
_exptl_crystal_F_000               808
_exptl_crystal_size_max            0.45
_exptl_crystal_size_mid            0.29
_exptl_crystal_size_min            0.13
_exptl_transmission_factor_max     ?
_exptl_transmission_factor_min     ?
_diffrn_reflns_av_R_equivalents    0.0496
_diffrn_reflns_av_unetI/netI       0.0604
_diffrn_reflns_Laue_measured_fraction_full  0.993
_diffrn_reflns_Laue_measured_fraction_max  0.846
_diffrn_reflns_limit_h_max         13
_diffrn_reflns_limit_h_min         -15
_diffrn_reflns_limit_k_max         18
_diffrn_reflns_limit_k_min         -17
_diffrn_reflns_limit_l_max         15
_diffrn_reflns_limit_l_min         -16
_diffrn_reflns_number              11283
_diffrn_reflns_point_group_measured_fraction_full  0.993
_diffrn_reflns_point_group_measured_fraction_max  0.846
_diffrn_reflns_theta_full          25.242
_diffrn_reflns_theta_max           31.014
_diffrn_reflns_theta_min           3.572
_diffrn_ambient_temperature        295(2)
_diffrn_detector_area_resol_mean   16.5253
_diffrn_detector_type              Sapphire3
_diffrn_measured_fraction_theta_full  0.993
_diffrn_measured_fraction_theta_max  0.846
_diffrn_measurement_details
;
List of Runs (angles in degrees, time in seconds):

  # Type    Start    End  Width  t~exp~   \w     \q     \k     \f   Frames
--------------------------------------------------------------------------
  1  \w     31.00  91.00   1.00   20.00    --   21.29  44.00 -13.00   60
  2  \w    -45.00 -12.00   1.00   20.00    --   21.29 -44.00-164.00   33
  3  \w    -42.00   4.00   1.00   20.00    --  -22.85  44.00 -13.00   46
  4  \w    -72.00 -46.00   1.00   20.00    --  -22.85 -44.00-164.00   26
  5  \w    -20.00  59.00   1.00   20.00    --   21.29 -99.00-180.00   79
  6  \w    -39.00   6.00   1.00   20.00    --  -22.85 -77.00-150.00   45
  7  \w    -32.00 -10.00   1.00   20.00    --  -22.85 -77.00  30.00   22
;
_diffrn_measurement_device         'four-circle diffractometer'
_diffrn_measurement_device_type    'Xcalibur, Sapphire3'
_diffrn_measurement_method         '\w scans'
_diffrn_radiation_type             MoK\a
_diffrn_radiation_wavelength       0.71073
_diffrn_source                     ?
_reflns_Friedel_coverage           0.000
_reflns_Friedel_fraction_full      .
_reflns_Friedel_fraction_max       .
_reflns_number_gt                  2282
_reflns_number_total               4404
_reflns_special_details
;
 Reflections were merged by SHELXL according to the crystal
 class for the calculation of statistics and refinement.
 
 _reflns_Friedel_fraction is defined as the number of unique
 Friedel pairs measured divided by the number that would be
 possible theoretically, ignoring centric projections and
 systematic absences.
;
_reflns_threshold_expression       'I > 2\s(I)'
_computing_cell_refinement         'CrysAlisPro 1.171.41.123a (Rigaku OD, 2022)'
_computing_data_collection         'CrysAlisPro 1.171.41.123a (Rigaku OD, 2022)'
_computing_data_reduction          'CrysAlisPro 1.171.41.123a (Rigaku OD, 2022)'
_computing_molecular_graphics      'Olex2 1.3 (Dolomanov et al., 2009)'
_computing_publication_material    'Olex2 1.3 (Dolomanov et al., 2009)'
_computing_structure_refinement    'SHELXL 2018/3 (Sheldrick, 2015)'
_computing_structure_solution      'SHELXT 2018/2 (Sheldrick, 2018)'
_refine_diff_density_max           0.221
_refine_diff_density_min           -0.214
_refine_diff_density_rms           0.050
_refine_ls_extinction_coef         0.008(2)
_refine_ls_extinction_expression  
 'Fc^*^=kFc[1+0.001xFc^2^\l^3^/sin(2\q)]^-1/4^'
_refine_ls_extinction_method       'SHELXL-2018/3 (Sheldrick 2018)'
_refine_ls_goodness_of_fit_ref     1.003
_refine_ls_hydrogen_treatment      mixed
_refine_ls_matrix_type             full
_refine_ls_number_parameters       245
_refine_ls_number_reflns           4404
_refine_ls_number_restraints       0
_refine_ls_R_factor_all            0.1148
_refine_ls_R_factor_gt             0.0544
_refine_ls_restrained_S_all        1.003
_refine_ls_shift/su_max            0.000
_refine_ls_shift/su_mean           0.000
_refine_ls_structure_factor_coef   Fsqd
_refine_ls_weighting_details      
 'w=1/[\s^2^(Fo^2^)+(0.0950P)^2^] where P=(Fo^2^+2Fc^2^)/3'
_refine_ls_weighting_scheme        calc
_refine_ls_wR_factor_gt            0.1455
_refine_ls_wR_factor_ref           0.2039
_refine_special_details            ?
_olex2_refinement_description
;
1. Fixed Uiso
 At 1.2 times of:
  All C(H,H) groups
 At 1.5 times of:
  All C(H,H,H) groups
2.a Secondary CH2 refined with riding coordinates:
 C8(H8A,H8B), C4(H4A,H4B), C6(H6A,H6B), C7(H7A,H7B), C12(H12A,H12B)
2.b Idealised Me refined as rotating group:
 C13(H13A,H13B,H13C)
;
_atom_sites_solution_hydrogens     mixed
_atom_sites_solution_primary       dual
_atom_sites_solution_secondary     ?
loop_
  _atom_site_label
  _atom_site_type_symbol
  _atom_site_fract_x
  _atom_site_fract_y
  _atom_site_fract_z
  _atom_site_U_iso_or_equiv
  _atom_site_adp_type
  _atom_site_occupancy
  _atom_site_site_symmetry_order
  _atom_site_calc_flag
  _atom_site_refinement_flags_posn
  _atom_site_refinement_flags_adp
  _atom_site_refinement_flags_occupancy
  _atom_site_disorder_assembly
  _atom_site_disorder_group
 O6 O 0.69327(16) 0.38663(12) 0.45132(16) 0.0481(5) Uani 1 1 d . . . . .
 O3 O 0.74117(15) 0.32421(12) 0.70919(16) 0.0477(5) Uani 1 1 d . . . . .
 F5 F 0.72125(19) 0.69223(12) 0.55910(17) 0.0745(6) Uani 1 1 d . . . . .
 O2 O 0.54724(16) 0.39020(13) 1.02240(17) 0.0532(5) Uani 1 1 d . . . . .
 O4 O 0.88156(16) 0.54881(14) 0.63558(17) 0.0522(5) Uani 1 1 d . . . . .
 F6 F 0.61451(17) 0.59072(13) 0.44939(18) 0.0754(6) Uani 1 1 d . . . . .
 F4 F 0.8023(2) 0.62162(14) 0.41177(18) 0.0829(6) Uani 1 1 d . . . . .
 O1 O 0.69615(19) 0.58906(13) 0.9404(2) 0.0558(5) Uani 1 1 d . . . . .
 F3 F 0.8232(2) 0.37938(16) 1.10338(17) 0.0850(6) Uani 1 1 d . . . . .
 F2 F 0.72624(18) 0.50949(16) 1.16524(17) 0.0877(7) Uani 1 1 d . . . . .
 F1 F 0.89890(17) 0.52883(17) 1.08379(18) 0.0880(6) Uani 1 1 d . . . . .
 O5 O 0.89876(17) 0.40130(16) 0.4764(2) 0.0646(6) Uani 1 1 d . . . . .
 N1 N 0.60351(18) 0.39131(14) 0.83015(19) 0.0415(5) Uani 1 1 d . . . . .
 C5 C 0.7106(2) 0.41738(16) 0.7625(2) 0.0389(5) Uani 1 1 d . . . . .
 C8 C 0.6750(2) 0.49742(17) 0.6696(2) 0.0401(5) Uani 1 1 d . . . . .
 H8A H 0.658398 0.560597 0.709482 0.048 Uiso 1 1 calc R U . . .
 H8B H 0.599174 0.476234 0.628538 0.048 Uiso 1 1 calc R U . . .
 C2 C 0.6150(2) 0.41652(18) 0.9451(2) 0.0429(6) Uani 1 1 d . . . . .
 C9 C 0.7715(2) 0.51761(17) 0.5778(2) 0.0412(5) Uani 1 1 d . . . . .
 C4 C 0.8063(2) 0.4503(2) 0.8579(2) 0.0434(6) Uani 1 1 d . . . . .
 H4A H 0.858629 0.394050 0.882765 0.052 Uiso 1 1 calc R U . . .
 H4B H 0.857105 0.504969 0.830301 0.052 Uiso 1 1 calc R U . . .
 C11 C 0.7955(2) 0.42674(19) 0.4968(2) 0.0461(6) Uani 1 1 d . . . . .
 C6 C 0.5398(2) 0.30261(19) 0.7807(2) 0.0493(6) Uani 1 1 d . . . . .
 H6A H 0.460395 0.320650 0.744407 0.059 Uiso 1 1 calc R U . . .
 H6B H 0.528580 0.251126 0.840148 0.059 Uiso 1 1 calc R U . . .
 C3 C 0.7278(2) 0.48586(18) 0.9578(2) 0.0447(6) Uani 1 1 d . . . . .
 C10 C 0.7264(3) 0.6057(2) 0.4988(3) 0.0539(7) Uani 1 1 d . . . . .
 C7 C 0.6287(3) 0.2673(2) 0.6893(3) 0.0559(7) Uani 1 1 d . . . . .
 H7A H 0.644631 0.195258 0.697800 0.067 Uiso 1 1 calc R U . . .
 H7B H 0.594109 0.279717 0.610444 0.067 Uiso 1 1 calc R U . . .
 C12 C 0.7069(3) 0.3011(2) 0.3718(3) 0.0579(7) Uani 1 1 d . . . . .
 H12A H 0.736450 0.242069 0.415409 0.070 Uiso 1 1 calc R U . . .
 H12B H 0.765579 0.317409 0.313006 0.070 Uiso 1 1 calc R U . . .
 C1 C 0.7939(3) 0.4757(3) 1.0784(3) 0.0617(8) Uani 1 1 d . . . . .
 C13 C 0.5829(3) 0.2800(3) 0.3139(3) 0.0782(10) Uani 1 1 d . . . . .
 H13A H 0.588584 0.223028 0.261873 0.117 Uiso 1 1 calc R U . . .
 H13B H 0.555364 0.338389 0.269701 0.117 Uiso 1 1 calc R U . . .
 H13C H 0.525323 0.265043 0.372955 0.117 Uiso 1 1 calc R U . . .
 H4 H 0.943(3) 0.541(2) 0.589(4) 0.090(12) Uiso 1 1 d . . . . .
 H1 H 0.618(3) 0.597(2) 0.967(3) 0.067(9) Uiso 1 1 d . . . . .

loop_
  _atom_site_aniso_label
  _atom_site_aniso_U_11
  _atom_site_aniso_U_22
  _atom_site_aniso_U_33
  _atom_site_aniso_U_23
  _atom_site_aniso_U_13
  _atom_site_aniso_U_12
 O6 0.0491(10) 0.0515(10) 0.0441(10) -0.0047(8) 0.0086(8) -0.0004(8)
 O3 0.0494(10) 0.0451(10) 0.0493(10) -0.0010(8) 0.0099(9) 0.0054(8)
 F5 0.1053(15) 0.0449(9) 0.0733(12) 0.0017(8) 0.0047(11) -0.0017(9)
 O2 0.0528(11) 0.0607(11) 0.0478(11) 0.0055(8) 0.0189(9) -0.0047(8)
 O4 0.0398(10) 0.0729(12) 0.0448(11) -0.0014(9) 0.0097(9) -0.0126(9)
 F6 0.0742(12) 0.0716(12) 0.0781(13) 0.0195(9) -0.0218(10) -0.0025(9)
 F4 0.1051(15) 0.0860(12) 0.0600(12) 0.0248(9) 0.0301(12) -0.0065(11)
 O1 0.0496(11) 0.0501(11) 0.0692(14) -0.0010(9) 0.0177(11) -0.0039(8)
 F3 0.1050(16) 0.0973(15) 0.0516(11) 0.0122(10) -0.0101(11) 0.0126(12)
 F2 0.0934(15) 0.1229(16) 0.0481(11) -0.0234(10) 0.0176(11) -0.0147(12)
 F1 0.0666(12) 0.1291(17) 0.0672(13) -0.0127(12) -0.0098(10) -0.0256(11)
 O5 0.0439(11) 0.0732(13) 0.0785(16) -0.0085(10) 0.0227(11) -0.0017(9)
 N1 0.0369(10) 0.0452(11) 0.0429(11) 0.0020(9) 0.0085(9) -0.0043(8)
 C5 0.0337(11) 0.0402(12) 0.0436(13) 0.0005(10) 0.0088(10) 0.0007(9)
 C8 0.0339(11) 0.0461(13) 0.0405(13) 0.0026(10) 0.0045(10) 0.0003(10)
 C2 0.0407(13) 0.0459(14) 0.0428(13) 0.0051(10) 0.0106(11) 0.0034(10)
 C9 0.0375(12) 0.0476(13) 0.0386(13) 0.0038(10) 0.0042(10) -0.0067(10)
 C4 0.0359(12) 0.0567(14) 0.0380(13) 0.0030(10) 0.0058(10) 0.0014(10)
 C11 0.0438(14) 0.0527(14) 0.0427(14) 0.0041(11) 0.0133(12) -0.0030(11)
 C6 0.0488(14) 0.0495(15) 0.0496(15) 0.0038(11) 0.0009(12) -0.0091(12)
 C3 0.0427(13) 0.0466(14) 0.0453(14) 0.0002(11) 0.0083(11) -0.0021(11)
 C10 0.0613(17) 0.0543(16) 0.0464(15) 0.0063(12) 0.0068(14) -0.0041(13)
 C7 0.0647(18) 0.0475(15) 0.0560(17) -0.0011(12) 0.0101(15) -0.0094(13)
 C12 0.074(2) 0.0531(16) 0.0476(16) -0.0076(12) 0.0152(15) 0.0014(14)
 C1 0.0578(18) 0.081(2) 0.0465(16) -0.0067(15) 0.0069(14) -0.0061(15)
 C13 0.081(2) 0.087(2) 0.067(2) -0.0277(18) 0.0039(19) -0.0085(19)

_geom_special_details
;
 All esds (except the esd in the dihedral angle between two l.s. planes)
 are estimated using the full covariance matrix.  The cell esds are taken
 into account individually in the estimation of esds in distances, angles
 and torsion angles; correlations between esds in cell parameters are only
 used when they are defined by crystal symmetry.  An approximate (isotropic)
 treatment of cell esds is used for estimating esds involving l.s. planes.
;
loop_
  _geom_bond_atom_site_label_1
  _geom_bond_atom_site_label_2
  _geom_bond_distance
  _geom_bond_site_symmetry_2
  _geom_bond_publ_flag
 O6 C11 1.317(3) . ?
 O6 C12 1.457(3) . ?
 O3 C5 1.417(3) . ?
 O3 C7 1.445(3) . ?
 F5 C10 1.334(3) . ?
 O2 C2 1.224(3) . ?
 O4 C9 1.401(3) . ?
 O4 H4 0.87(4) . ?
 F6 C10 1.333(3) . ?
 F4 C10 1.335(3) . ?
 O1 C3 1.416(3) . ?
 O1 H1 0.92(3) . ?
 F3 C1 1.337(4) . ?
 F2 C1 1.336(3) . ?
 F1 C1 1.340(3) . ?
 O5 C11 1.206(3) . ?
 N1 C5 1.467(3) . ?
 N1 C2 1.349(3) . ?
 N1 C6 1.460(3) . ?
 C5 C8 1.531(3) . ?
 C5 C4 1.532(4) . ?
 C8 H8A 0.9700 . ?
 C8 H8B 0.9700 . ?
 C8 C9 1.538(3) . ?
 C2 C3 1.533(3) . ?
 C9 C11 1.541(4) . ?
 C9 C10 1.536(4) . ?
 C4 H4A 0.9700 . ?
 C4 H4B 0.9700 . ?
 C4 C3 1.525(3) . ?
 C6 H6A 0.9700 . ?
 C6 H6B 0.9700 . ?
 C6 C7 1.526(4) . ?
 C3 C1 1.525(4) . ?
 C7 H7A 0.9700 . ?
 C7 H7B 0.9700 . ?
 C12 H12A 0.9700 . ?
 C12 H12B 0.9700 . ?
 C12 C13 1.501(4) . ?
 C13 H13A 0.9600 . ?
 C13 H13B 0.9600 . ?
 C13 H13C 0.9600 . ?

loop_
  _geom_angle_atom_site_label_1
  _geom_angle_atom_site_label_2
  _geom_angle_atom_site_label_3
  _geom_angle
  _geom_angle_site_symmetry_1
  _geom_angle_site_symmetry_3
  _geom_angle_publ_flag
 C11 O6 C12 116.5(2) . . ?
 C5 O3 C7 107.71(18) . . ?
 C9 O4 H4 110(3) . . ?
 C3 O1 H1 106.7(18) . . ?
 C2 N1 C5 114.2(2) . . ?
 C2 N1 C6 126.3(2) . . ?
 C6 N1 C5 111.14(18) . . ?
 O3 C5 N1 103.23(17) . . ?
 O3 C5 C8 111.1(2) . . ?
 O3 C5 C4 112.59(19) . . ?
 N1 C5 C8 109.97(18) . . ?
 N1 C5 C4 102.99(19) . . ?
 C8 C5 C4 115.84(19) . . ?
 C5 C8 H8A 108.4 . . ?
 C5 C8 H8B 108.4 . . ?
 C5 C8 C9 115.35(19) . . ?
 H8A C8 H8B 107.5 . . ?
 C9 C8 H8A 108.4 . . ?
 C9 C8 H8B 108.4 . . ?
 O2 C2 N1 126.4(2) . . ?
 O2 C2 C3 127.5(2) . . ?
 N1 C2 C3 106.05(19) . . ?
 O4 C9 C8 109.2(2) . . ?
 O4 C9 C11 110.11(19) . . ?
 O4 C9 C10 107.18(19) . . ?
 C8 C9 C11 114.24(19) . . ?
 C10 C9 C8 108.5(2) . . ?
 C10 C9 C11 107.3(2) . . ?
 C5 C4 H4A 111.1 . . ?
 C5 C4 H4B 111.1 . . ?
 H4A C4 H4B 109.1 . . ?
 C3 C4 C5 103.28(19) . . ?
 C3 C4 H4A 111.1 . . ?
 C3 C4 H4B 111.1 . . ?
 O6 C11 C9 112.6(2) . . ?
 O5 C11 O6 126.2(3) . . ?
 O5 C11 C9 121.1(2) . . ?
 N1 C6 H6A 111.4 . . ?
 N1 C6 H6B 111.4 . . ?
 N1 C6 C7 101.68(19) . . ?
 H6A C6 H6B 109.3 . . ?
 C7 C6 H6A 111.4 . . ?
 C7 C6 H6B 111.4 . . ?
 O1 C3 C2 111.8(2) . . ?
 O1 C3 C4 109.4(2) . . ?
 O1 C3 C1 108.2(2) . . ?
 C4 C3 C2 102.7(2) . . ?
 C1 C3 C2 112.0(2) . . ?
 C1 C3 C4 112.7(2) . . ?
 F5 C10 F4 106.8(2) . . ?
 F5 C10 C9 111.5(2) . . ?
 F6 C10 F5 106.5(2) . . ?
 F6 C10 F4 107.2(3) . . ?
 F6 C10 C9 113.3(2) . . ?
 F4 C10 C9 111.2(2) . . ?
 O3 C7 C6 107.1(2) . . ?
 O3 C7 H7A 110.3 . . ?
 O3 C7 H7B 110.3 . . ?
 C6 C7 H7A 110.3 . . ?
 C6 C7 H7B 110.3 . . ?
 H7A C7 H7B 108.6 . . ?
 O6 C12 H12A 110.2 . . ?
 O6 C12 H12B 110.2 . . ?
 O6 C12 C13 107.5(2) . . ?
 H12A C12 H12B 108.5 . . ?
 C13 C12 H12A 110.2 . . ?
 C13 C12 H12B 110.2 . . ?
 F3 C1 F1 107.0(3) . . ?
 F3 C1 C3 111.9(2) . . ?
 F2 C1 F3 107.1(3) . . ?
 F2 C1 F1 106.8(2) . . ?
 F2 C1 C3 112.5(3) . . ?
 F1 C1 C3 111.1(2) . . ?
 C12 C13 H13A 109.5 . . ?
 C12 C13 H13B 109.5 . . ?
 C12 C13 H13C 109.5 . . ?
 H13A C13 H13B 109.5 . . ?
 H13A C13 H13C 109.5 . . ?
 H13B C13 H13C 109.5 . . ?

loop_
  _geom_torsion_atom_site_label_1
  _geom_torsion_atom_site_label_2
  _geom_torsion_atom_site_label_3
  _geom_torsion_atom_site_label_4
  _geom_torsion
  _geom_torsion_site_symmetry_1
  _geom_torsion_site_symmetry_2
  _geom_torsion_site_symmetry_3
  _geom_torsion_site_symmetry_4
  _geom_torsion_publ_flag
 O3 C5 C8 C9 -55.7(3) . . . . ?
 O3 C5 C4 C3 -136.1(2) . . . . ?
 O2 C2 C3 O1 -89.7(3) . . . . ?
 O2 C2 C3 C4 153.1(2) . . . . ?
 O2 C2 C3 C1 32.0(3) . . . . ?
 O4 C9 C11 O6 172.3(2) . . . . ?
 O4 C9 C11 O5 -10.7(3) . . . . ?
 O4 C9 C10 F5 -52.2(3) . . . . ?
 O4 C9 C10 F6 -172.4(2) . . . . ?
 O4 C9 C10 F4 66.9(3) . . . . ?
 O1 C3 C1 F3 177.8(2) . . . . ?
 O1 C3 C1 F2 57.1(3) . . . . ?
 O1 C3 C1 F1 -62.6(3) . . . . ?
 N1 C5 C8 C9 -169.34(19) . . . . ?
 N1 C5 C4 C3 -25.6(2) . . . . ?
 N1 C2 C3 O1 89.2(2) . . . . ?
 N1 C2 C3 C4 -28.0(2) . . . . ?
 N1 C2 C3 C1 -149.2(2) . . . . ?
 N1 C6 C7 O3 10.5(3) . . . . ?
 C5 O3 C7 C6 -26.6(3) . . . . ?
 C5 N1 C2 O2 -168.8(2) . . . . ?
 C5 N1 C2 C3 12.3(3) . . . . ?
 C5 N1 C6 C7 8.5(3) . . . . ?
 C5 C8 C9 O4 -58.5(3) . . . . ?
 C5 C8 C9 C11 65.3(3) . . . . ?
 C5 C8 C9 C10 -175.0(2) . . . . ?
 C5 C4 C3 O1 -86.5(2) . . . . ?
 C5 C4 C3 C2 32.4(2) . . . . ?
 C5 C4 C3 C1 153.1(2) . . . . ?
 C8 C5 C4 C3 94.5(2) . . . . ?
 C8 C9 C11 O6 49.0(3) . . . . ?
 C8 C9 C11 O5 -134.0(3) . . . . ?
 C8 C9 C10 F5 65.7(3) . . . . ?
 C8 C9 C10 F6 -54.5(3) . . . . ?
 C8 C9 C10 F4 -175.3(2) . . . . ?
 C2 N1 C5 O3 126.0(2) . . . . ?
 C2 N1 C5 C8 -115.4(2) . . . . ?
 C2 N1 C5 C4 8.6(3) . . . . ?
 C2 N1 C6 C7 -137.6(2) . . . . ?
 C2 C3 C1 F3 54.1(3) . . . . ?
 C2 C3 C1 F2 -66.6(3) . . . . ?
 C2 C3 C1 F1 173.7(2) . . . . ?
 C4 C5 C8 C9 74.4(3) . . . . ?
 C4 C3 C1 F3 -61.1(3) . . . . ?
 C4 C3 C1 F2 178.2(2) . . . . ?
 C4 C3 C1 F1 58.5(3) . . . . ?
 C11 O6 C12 C13 -169.8(3) . . . . ?
 C11 C9 C10 F5 -170.4(2) . . . . ?
 C11 C9 C10 F6 69.4(3) . . . . ?
 C11 C9 C10 F4 -51.4(3) . . . . ?
 C6 N1 C5 O3 -24.5(2) . . . . ?
 C6 N1 C5 C8 94.1(2) . . . . ?
 C6 N1 C5 C4 -141.8(2) . . . . ?
 C6 N1 C2 O2 -23.6(4) . . . . ?
 C6 N1 C2 C3 157.5(2) . . . . ?
 C10 C9 C11 O6 -71.4(3) . . . . ?
 C10 C9 C11 O5 105.6(3) . . . . ?
 C7 O3 C5 N1 30.8(2) . . . . ?
 C7 O3 C5 C8 -87.1(2) . . . . ?
 C7 O3 C5 C4 141.1(2) . . . . ?
 C12 O6 C11 O5 2.2(4) . . . . ?
 C12 O6 C11 C9 179.0(2) . . . . ?

loop_
  _diffrn_refln_index_h
  _diffrn_refln_index_k
  _diffrn_refln_index_l
  _diffrn_refln_intensity_net
  _diffrn_refln_intensity_u
 0 0 3 -2.16 1.11
 0 0 4 46.82 4.35
 0 0 5 -2.96 1.9
 0 0 6 15.35 3.04
 0 0 6 6.98 0.91
 0 0 7 -0.15 0.16
 0 0 7 -1.38 0.85
 0 0 8 272.93 15.69
 0 0 9 -1.03 1.85
 0 0 10 16.63 4.26
 0 0 11 -2.1 2.16
 0 0 12 7.02 3.12
 0 0 13 -3.68 2.92
 0 0 14 2.99 2.71
 0 0 15 -2.37 2.56
 0 -1 -2 263.02 5.09
 0 1 2 252.99 7.1
 0 -1 2 255.45 6.99
 0 -1 3 452.36 11.53
 0 1 3 431.99 11.43
 0 -1 4 31.43 3.49
 0 1 4 32.4 3.67
 0 1 5 105.07 7.14
 0 -1 5 106.02 7.16
 0 -1 6 2.36 1.47
 0 1 6 3.32 2.08
 0 1 7 22.05 3.84
 0 -1 7 22.32 3.96
 0 -1 8 119.5 10.48
 0 1 8 130.66 10.77
 0 -1 9 37.24 6.02
 0 1 9 35.92 5.75
 0 -1 10 4.38 2.5
 0 1 10 2.83 2.31
 0 -1 11 -0.04 1.78
 0 1 11 3.21 2.51
 0 -1 12 40.32 7.55
 0 1 12 34.64 7.01
 0 -1 13 -2.72 2.4
 0 1 13 -2.68 1.94
 0 -1 14 3.82 2.99
 0 1 14 -0.89 1.74
 0 -1 15 11.85 4.45
 0 1 15 23.14 6.79
 0 -2 -1 316.51 7.7
 0 2 2 2353.08 21.36
 0 -2 -2 2425.24 24.43
 0 -2 -3 1284.5 15.35
 0 -2 3 1257.59 19.45
 0 2 3 1304.28 19.68
 0 -2 4 339.64 11.85
 0 -2 -4 335.94 8.29
 0 2 4 341.63 11.58
 0 -2 5 68.59 5.81
 0 2 5 79.67 6.2
 0 2 6 3.65 1.52
 0 -2 6 0.93 0.66
 0 2 7 23.82 3.98
 0 -2 7 27.01 4.57
 0 2 8 -0.13 1.42
 0 -2 8 3.81 2.11
 0 -2 9 54.29 7.53
 0 2 9 58.25 7.55
 0 2 10 68.47 8.78
 0 -2 10 65.71 8.75
 0 2 11 26.68 5.67
 0 -2 11 28.44 6.01
 0 2 12 58.18 9.15
 0 -2 12 52.85 8.87
 0 2 13 -4.44 2.75
 0 -2 13 0.8 1.19
 0 -2 14 -4.13 2.85
 0 2 14 -1.08 2.34
 0 2 15 0 2.23
 0 -2 15 3.57 3.65
 0 2 -15 1.67 2.32
 0 -2 -15 0.99 1.67
 0 -3 0 1.06 0.74
 0 3 0 3.45 1.17
 0 3 1 1715.85 20
 0 -3 1 1766.38 12.87
 0 3 1 1768.5 12.92
 0 3 -1 1732.51 17.94
 0 -3 2 -0.33 0.71
 0 3 2 1.4 0.51
 0 3 2 0.95 0.6
 0 -3 -2 1.34 0.51
 0 3 3 5.72 1.23
 0 -3 3 8.51 1.62
 0 3 4 670.01 16.1
 0 -3 -4 662.55 13.66
 0 -3 4 664.06 16.26
 0 3 5 2.01 1.03
 0 -3 5 4.67 1.54
 0 -3 -5 4.08 1.06
 0 -3 6 -1.43 1.31
 0 3 6 -0.88 0.61
 0 -3 7 135.33 10.41
 0 3 7 132.69 9.94
 0 -3 8 79.56 8.39
 0 3 8 79.1 8.27
 0 3 9 43.48 6.57
 0 -3 9 43.9 6.64
 0 -3 10 0.48 1.18
 0 3 10 0.56 0.87
 0 -3 11 4.01 2.34
 0 3 11 7.06 3.25
 0 3 12 15.02 4.39
 0 -3 12 17.15 5.06
 0 3 13 2.4 2.25
 0 -3 13 -1.54 2.69
 0 3 14 0.26 0.89
 0 -3 14 -1.18 1.71
 0 3 15 1.78 2.65
 0 3 -15 -0.93 1.57
 0 -3 15 2.77 2.91
 0 -3 -15 2.54 2.6
 0 4 0 475.26 10.81
 0 -4 0 508.53 11.49
 0 -4 1 12.02 1.05
 0 4 -1 14.73 1.87
 0 -4 -1 16.61 2.36
 0 4 1 15.12 2.08
 0 4 1 15.06 1.25
 0 4 2 2148.13 20.31
 0 4 2 2114.58 27.13
 0 -4 2 2082.16 20.39
 0 -4 3 285.74 9.24
 0 4 3 274.39 9.02
 0 4 4 822.96 18.05
 0 -4 4 817.97 18.25
 0 -4 -5 3.4 1.26
 0 4 5 3.26 1.54
 0 -4 5 4.29 1.38
 0 -4 -6 51.92 4.39
 0 4 6 47.81 5.45
 0 -4 6 46.73 5.62
 0 -4 7 0.28 1.16
 0 4 7 0.81 1.18
 0 -4 8 48.72 6.59
 0 4 8 46.42 6.28
 0 -4 9 9.69 3.35
 0 4 9 10.47 3.36
 0 -4 10 5.76 2.81
 0 4 10 6.12 2.85
 0 -4 11 40.4 7.18
 0 4 11 37.61 6.87
 0 4 12 4.3 2.46
 0 -4 12 12.25 4.17
 0 4 13 0.07 0.83
 0 -4 13 1.64 1.6
 0 4 14 4.24 2.9
 0 -4 14 -3.88 3.27
 0 -4 -15 1.09 2.47
 0 4 15 5.26 3.53
 0 4 -15 2.3 3.03
 0 -4 15 3.34 3.08
 0 -5 0 0.23 0.56
 0 5 0 1.17 0.83
 0 -5 1 -0.49 0.77
 0 -5 -1 1.26 0.85
 0 -5 -1 0.22 0.34
 0 5 1 1.38 0.42
 0 5 1 -0.31 0.62
 0 5 -1 0.61 0.78
 0 -5 2 819.59 12.49
 0 5 -2 872.98 16.59
 0 5 2 871.76 12.68
 0 5 2 876.34 18.91
 0 -5 3 767.02 15.43
 0 5 3 801.63 15.61
 0 5 3 811.61 19.38
 0 5 4 0.4 0.51
 0 -5 4 1.39 0.87
 0 5 5 9.37 2.18
 0 -5 5 8.63 2.09
 0 5 6 63.24 6.22
 0 -5 6 65.65 6.55
 0 -5 -6 65.05 5.39
 0 5 7 15.55 3.46
 0 -5 7 15.22 3.46
 0 -5 -7 15.18 2.55
 0 -5 8 9.09 3.12
 0 5 8 6.72 2.06
 0 -5 9 6.48 2.7
 0 5 9 6.36 2.5
 0 -5 10 7.12 2.64
 0 5 10 9.74 3.71
 0 5 11 -4.67 2.85
 0 -5 11 -1.33 1.8
 0 -5 12 4.5 2.66
 0 5 12 0.94 1.74
 0 5 13 -0.94 0.78
 0 -5 13 -3.64 2.57
 0 -5 -14 1.06 2.01
 0 5 -14 -4.41 2.86
 0 -5 14 0.52 0.74
 0 5 14 -2.48 2.19
 0 6 0 458.87 12.74
 0 -6 1 0.27 0.24
 0 6 -1 1.1 0.94
 0 6 1 -0.36 0.85
 0 6 2 740.12 18.53
 0 6 2 742.63 11.63
 0 6 -2 708 15.75
 0 -6 2 716.73 11.17
 0 -6 3 24.35 2.74
 0 6 3 21.49 2.5
 0 6 3 20.14 3.01
 0 6 -3 24.05 2.98
 0 6 4 215.64 9.11
 0 -6 4 209.46 9.09
 0 -6 5 92.76 6.84
 0 6 5 85.47 6.42
 0 -6 -6 11.14 2.29
 0 -6 6 12.29 2.75
 0 6 6 10.16 2.33
 0 -6 7 10.74 2.41
 0 -6 -7 10.65 2.24
 0 6 7 10.51 2.72
 0 -6 -8 37.25 4.77
 0 -6 8 34.79 5.66
 0 6 8 36.96 5.51
 0 6 9 24.18 4.79
 0 -6 9 23.26 5.08
 0 6 10 5.92 2.5
 0 -6 10 3.3 2.08
 0 -6 11 16.54 4.89
 0 6 11 16.13 4.51
 0 6 12 3.98 2.4
 0 -6 12 -1.77 1.97
 0 -6 13 -0.57 1.43
 0 6 13 0.07 1.1
 0 -6 -14 2.45 2.84
 0 6 14 0.27 0.94
 0 6 -14 -0.18 0.84
 0 -6 14 0.22 0.69
 0 7 0 0.27 0.64
 0 -7 0 0.23 0.34
 0 7 -1 182.29 8.46
 0 7 1 178.61 8.82
 0 -7 1 184.88 4.58
 0 -7 2 574.17 9.27
 0 -7 -2 543.96 10.49
 0 7 -2 597.96 9.59
 0 7 2 639.46 10.34
 0 7 -2 586.08 15.46
 0 7 2 615.06 17.99
 0 7 -3 0.21 0.94
 0 -7 3 0.79 0.56
 0 7 3 0.22 0.24
 0 7 3 1.93 1.42
 0 -7 4 339.91 11.76
 0 7 4 350.77 11.84
 0 7 -4 336.22 13.18
 0 7 5 3.98 1.28
 0 -7 5 5.38 1.69
 0 -7 -6 30.75 4.22
 0 7 6 33.19 4.52
 0 -7 6 30.42 4.4
 0 -7 -7 47.12 5.39
 0 -7 7 45.11 6.02
 0 7 7 50.72 5.94
 0 7 8 1.93 1.88
 0 -7 8 3.2 2.07
 0 -7 -8 0.95 0.88
 0 -7 9 0.99 1.06
 0 7 9 2.59 1.44
 0 7 10 5.38 2.56
 0 -7 10 6.23 3.05
 0 -7 11 9.99 3.78
 0 7 11 12.58 3.96
 0 7 12 1.34 2.01
 0 -7 12 -4.28 2.93
 0 -7 -13 9.81 4.49
 0 7 13 6.31 3.15
 0 7 -13 1.87 2.4
 0 -7 13 3.16 2.52
 0 -7 14 -1.17 1.59
 0 -7 -14 -3.01 2.36
 0 7 -14 0.05 0.8
 0 7 14 2.32 2.02
 0 -8 0 53.4 3.75
 0 8 0 51.79 4.83
 0 -8 1 0.64 0.36
 0 8 -1 -0.22 0.71
 0 8 -2 112.3 3.52
 0 8 -2 122.2 3.68
 0 8 -2 126.87 7.67
 0 -8 -2 124.71 4.58
 0 8 2 124.52 8.48
 0 8 3 53.32 5.79
 0 8 -3 59.29 3.91
 0 8 -3 59.44 5.43
 0 -8 -3 52.51 4.11
 0 -8 3 49.09 3.61
 0 8 3 63.28 4.24
 0 -8 -4 30.04 3.85
 0 8 -4 29.09 3.98
 0 8 4 32.89 3.56
 0 -8 4 30.16 3.48
 0 8 -4 34.34 3.54
 0 8 -5 3.08 1.16
 0 -8 5 3.35 1.36
 0 8 5 2.96 0.81
 0 -8 6 24.26 3.94
 0 8 6 27.12 3.94
 0 8 -6 26.17 1.91
 0 8 7 30.32 4.7
 0 -8 7 31.12 4.81
 0 -8 -7 28.87 4.52
 0 8 8 30.25 4.93
 0 -8 8 23.99 4.7
 0 -8 -8 26.67 4.46
 0 8 9 9.37 2.85
 0 -8 -9 9.21 2.74
 0 -8 9 10.04 3.21
 0 8 10 4.85 2.28
 0 -8 10 4.47 2.04
 0 8 -11 9 3.33
 0 -8 -11 8.38 3.04
 0 8 11 13.73 4.2
 0 -8 11 2.81 2.25
 0 -8 -12 26.32 6.29
 0 8 -12 19.64 5.37
 0 8 12 27.32 5.97
 0 -8 12 13.8 4.55
 0 -8 -13 1.68 1.78
 0 -8 13 3.81 2.83
 0 8 -13 0.86 1.28
 0 8 13 0.71 0.69
 0 -8 14 11.4 4.95
 0 8 -14 7.5 4.54
 0 8 14 15.26 5.28
 0 -8 -14 8.63 4
 0 -9 0 -0.01 0.58
 0 9 0 -1.59 1.52
 0 9 1 2.85 1.32
 0 -9 1 1.81 0.53
 0 9 -1 1.59 1.03
 0 9 -2 2.88 1.09
 0 9 2 1.42 0.79
 0 -9 -3 20.61 2.44
 0 9 -3 21.49 2.09
 0 9 -3 14.69 1.75
 0 9 3 19.83 3.66
 0 9 -3 22.61 3.49
 0 9 4 2.99 1.02
 0 -9 -4 2.98 1.16
 0 -9 4 2.34 1.01
 0 9 4 3.83 1.26
 0 9 -4 3.37 1.64
 0 9 -4 3.84 1.16
 0 9 -5 2.74 1.07
 0 9 -5 1.01 0.53
 0 -9 -5 3.63 1.54
 0 -9 5 2.8 1.31
 0 9 5 2.64 0.94
 0 -9 -6 4.49 1.69
 0 9 6 3.71 1.46
 0 9 -6 3.85 1.54
 0 9 -6 5.71 1.91
 0 -9 6 4.87 2.1
 0 -9 7 1.66 0.73
 0 -9 -7 2.67 1.96
 0 9 -7 0.99 1.02
 0 9 7 -0.47 1.44
 0 -9 -7 2.51 2.02
 0 -9 8 13.96 3.56
 0 -9 -8 15.2 3.46
 0 -9 -8 14.15 3.48
 0 9 8 13.16 3.08
 0 9 -8 15.08 3.78
 0 -9 -9 0.33 1.46
 0 -9 -9 4.84 2.15
 0 -9 9 2.84 1.61
 0 9 -9 4.68 2.26
 0 9 9 5.77 2.29
 0 -9 -10 0.41 1.28
 0 9 -10 3.44 2.1
 0 -9 10 2.55 2.41
 0 9 10 -0.55 0.88
 0 9 -11 1.9 1.59
 0 -9 11 -0.29 1.63
 0 -9 -11 0.19 0.88
 0 9 11 0.36 1.2
 0 9 -12 1.28 1.93
 0 -9 12 3.74 2.64
 0 -9 -12 2.25 2.25
 0 9 12 -0.1 1.06
 0 9 -13 0.86 1.56
 0 9 13 -0.12 1.3
 0 -9 13 0.49 1.05
 0 -9 -13 -0.47 0.99
 0 9 -14 0.03 0.74
 0 -9 -14 0 0.9
 0 -9 14 0.04 0.96
 0 9 14 -0.32 1.2
 0 -10 0 998.56 18.09
 0 10 0 963.33 23.83
 0 10 -1 9.26 2.21
 0 -10 -1 8.6 1.99
 0 10 1 11.41 2.74
 0 10 2 149.45 10.32
 0 10 -2 148.74 9.1
 0 10 -3 8.65 2.5
 0 10 -3 6.8 0.98
 0 10 3 5.8 2.05
 0 -10 -3 7.2 1.37
 0 -10 -4 69.01 5.34
 0 10 4 84.28 5.3
 0 10 -4 71.25 4.6
 0 10 4 69.04 7.53
 0 10 -4 72.32 6.64
 0 -10 -5 39.06 4.63
 0 10 -5 34.33 3.89
 0 10 5 35.43 4.04
 0 10 -5 32.91 4.59
 0 -10 5 35.25 4.08
 0 -10 -6 0.35 0.56
 0 10 6 0.55 0.89
 0 10 -6 -0.44 0.67
 0 10 -6 1.08 1.29
 0 -10 6 -0.27 0.76
 0 -10 -7 3.26 1.7
 0 -10 -7 5.37 2.32
 0 10 7 2.25 0.99
 0 10 -7 1.94 1.35
 0 10 -7 5.31 2.25
 0 -10 7 2.02 1.14
 0 -10 -8 24.84 4.85
 0 -10 -8 19.52 4.27
 0 -10 8 26.44 5.05
 0 10 -8 25.72 4.62
 0 10 8 24.96 4.53
 0 10 -9 -0.64 1.39
 0 10 9 -0.11 1.37
 0 -10 9 3.43 2.08
 0 -10 -9 1.19 1.55
 0 -10 -9 -0.8 1.54
 0 10 10 6.49 2.83
 0 10 -10 9.94 3.42
 0 -10 10 4.47 2.37
 0 -10 -10 4.09 2.41
 0 -10 -11 1.42 1.16
 0 -10 11 1.93 2.2
 0 10 11 3.48 2.14
 0 10 12 -1.86 1.46
 0 11 0 1.3 0.83
 0 -11 0 1.49 0.98
 0 11 -1 6.25 1.8
 0 -11 -1 6.78 1.78
 0 11 1 6.47 1.94
 0 11 -2 30.87 4.53
 0 -11 -2 31.58 4.31
 0 11 2 31.68 4.93
 0 11 -3 12.8 2.85
 0 11 3 11.63 3.2
 0 11 -4 2.3 1.87
 0 11 4 -0.19 1.16
 0 11 -5 0.91 0.78
 0 11 -6 26.93 4.63
 0 -11 -7 3.36 1.93
 0 11 -7 4 2.12
 0 11 -8 -0.34 1.65
 0 -11 -8 0.02 0.78
 0 -11 -9 2.29 1.22
 0 11 -9 3.95 1.88
 0 12 0 4.98 2.01
 0 12 -1 0.32 0.4
 0 -12 -1 0.19 0.5
 0 12 1 0.58 1.02
 0 12 2 -0.36 0.99
 0 12 -2 0.8 0.69
 0 -12 -2 -0.87 1.07
 0 12 -3 55.04 6.31
 0 12 3 46.76 6.43
 0 -12 -3 48.35 5.99
 0 12 -4 44.55 5.77
 0 12 -5 25.91 4.41
 0 12 -6 2.33 1.46
 0 -12 -7 3.27 2.19
 0 12 -7 1.44 1.57
 0 -12 -8 11.24 3.87
 0 -12 -9 -0.68 1.04
 0 13 0 0.51 0.53
 0 13 1 7.64 2.54
 0 13 -1 9.86 2.64
 0 13 -2 1.86 1.2
 0 13 2 4.53 2.28
 0 -13 -3 28.33 4.62
 0 13 -3 27.53 4.67
 0 13 3 25.06 4.75
 0 -13 -4 8.93 2.84
 0 13 -4 13.15 3.17
 0 13 -5 14.6 3.42
 0 -13 -7 3.41 2.42
 0 -13 -8 -0.91 1.17
 0 -13 -9 0.62 1.13
 0 14 0 26.05 4.78
 0 14 -1 7.77 2.65
 0 14 1 8.24 2.65
 0 14 -2 6.93 2.23
 0 14 2 7.75 2.58
 0 14 -3 2.64 1.71
 0 14 3 1.25 0.88
 0 -14 -6 -0.58 0.72
 0 -14 -7 1.26 1.26
 0 -14 -8 2.44 2.49
 0 15 0 1.17 1.46
 0 15 1 3.32 2.1
 0 15 2 2.09 1.25
 0 15 3 0.41 1.03
 0 -15 -6 -0.8 1.2
 0 -15 -7 -0.76 1.22
 0 -15 -8 3.56 2.55
 0 -15 -9 2.32 2.42
 0 -15 -10 -0.72 1.55
 0 -16 -6 4.23 2.9
 0 -16 -7 0.78 2.22
 0 -16 -8 -6.88 3.39
 0 -17 -6 2.9 3.03
 -1 0 15 3.29 2.45
 -1 0 14 5.95 3.39
 -1 0 13 67.35 10.02
 -1 0 12 2.6 2.19
 -1 0 11 1.39 1.75
 -1 0 10 -0.74 0.97
 -1 0 9 -2.2 2.5
 -1 0 8 3.26 2.5
 -1 0 7 1.76 1.29
 -1 0 6 -1.64 1.34
 -1 0 5 234.81 10.75
 -1 0 4 -1.55 1.14
 1 0 -3 3193.92 31.42
 -1 0 3 2925.78 30.63
 -1 0 2 0.23 0.35
 1 0 -2 0.35 0.47
 -1 0 -2 0.9 0.44
 1 0 6 -0.54 0.84
 1 0 7 420.39 17.94
 1 0 8 0.01 1.01
 1 0 8 -0.03 0.2
 1 0 9 30.87 5.59
 1 0 10 -0.55 1.02
 1 0 11 51.88 8.1
 1 0 12 -1.31 1.72
 -1 0 -13 13.98 4.88
 1 0 13 8.62 3.32
 -1 0 -14 -4.73 3.18
 1 0 14 1.38 2.26
 1 0 15 -2.72 2.39
 -1 0 -15 1.66 2.19
 -1 1 15 17.08 6.14
 -1 -1 15 0 2.3
 -1 1 14 2.57 1.97
 -1 -1 14 0.98 2.62
 -1 -1 13 3.9 1.11
 -1 1 13 11.41 4.21
 -1 -1 12 0.48 1.39
 -1 1 12 1.59 1.53
 -1 -1 11 2.99 2.11
 -1 1 11 2.13 0.98
 -1 1 10 192.47 14.71
 -1 -1 10 185.19 14.57
 -1 1 9 -2.64 2.25
 -1 -1 9 0.47 1.34
 -1 1 8 321.59 16.77
 -1 -1 8 324.33 16.93
 -1 1 7 0.45 1.53
 -1 -1 7 1.17 1.44
 -1 -1 6 59.76 6.03
 -1 1 6 70.29 6.53
 -1 1 5 511.68 16.19
 -1 -1 5 521.16 16.25
 -1 1 4 4.9 1.8
 -1 -1 4 2.73 0.94
 1 -1 -3 25.65 2.75
 -1 -1 3 23.14 2.76
 1 1 -3 25.45 2.81
 -1 1 3 24.07 2.65
 1 -1 -3 25.75 2.78
 -1 1 2 73.85 4.12
 -1 -1 2 68.73 3.77
 1 -1 -2 75.19 4.27
 -1 -1 2 71.49 2.48
 -1 1 2 71.03 4.1
 1 -1 -2 77.1 4.15
 1 1 -2 70.88 3.99
 -1 1 -2 268.11 7.72
 -1 -1 -2 268.34 7.87
 1 1 2 246.76 6.7
 1 1 3 376.68 8.72
 1 1 4 2005.37 21.25
 1 1 5 268.6 8.13
 1 -1 6 772.3 22.88
 1 1 6 762.87 22.36
 1 1 7 0.7 1.19
 1 1 7 0.63 0.38
 1 1 8 -0.25 1.23
 1 1 8 -0.19 0.3
 1 -1 8 -1.21 1.58
 1 -1 9 -0.18 0.92
 1 1 9 1.51 1.56
 1 -1 10 0.84 0.94
 1 1 10 2.38 1.91
 1 1 11 0.66 1.22
 1 -1 11 0.3 1.44
 1 1 12 19.88 5.58
 1 -1 12 18.24 5.05
 1 -1 13 8.69 3.34
 1 1 13 12.53 4.32
 -1 1 -13 11.58 4.4
 -1 -1 -13 15.35 5.1
 1 1 14 43.59 8.74
 1 -1 14 35.63 7.46
 -1 1 -14 25.44 6.69
 -1 -1 -14 32.06 7.79
 1 1 15 2.08 2.08
 1 -1 15 7.34 3.97
 -1 1 -15 3.37 3.03
 -1 -1 -15 1.79 2.22
 -1 2 15 5.42 3.19
 -1 -2 15 7.22 3.75
 -1 2 14 10.68 4.28
 -1 -2 14 7.11 3.8
 -1 2 13 -1.8 2.3
 -1 -2 13 2.96 2.24
 -1 2 12 20.04 5.16
 -1 -2 12 24.77 5.92
 -1 -2 11 -1.23 1.43
 -1 2 11 -2.8 1.77
 -1 2 10 20.02 5.06
 -1 -2 10 20.96 5.04
 -1 2 9 105.64 10.32
 -1 -2 9 103.95 10.39
 -1 -2 8 5.2 2.34
 -1 2 8 8.81 2.89
 -1 2 7 121.71 9.33
 -1 -2 7 112.38 9.15
 -1 2 6 41.43 5.13
 -1 -2 6 41.26 4.83
 -1 2 5 329.04 12.87
 1 -2 -5 302.52 6.92
 -1 -2 5 309.02 12.81
 -1 2 4 43.13 4.12
 -1 -2 4 43.84 4.47
 1 -2 -3 68.99 4.45
 -1 2 3 65.32 4.64
 -1 -2 3 62.36 4.31
 1 2 -3 65.96 4.43
 1 -2 -2 464.9 10.18
 -1 -2 2 487.16 10.51
 1 -2 -2 467.85 11.43
 -1 2 2 452.75 10.07
 -1 2 2 455.9 11.37
 1 2 -2 487.93 7.96
 1 2 -2 505.58 10.67
 1 -2 -1 38.74 2.42
 1 2 -1 37.35 2.25
 1 2 -1 39.45 2.34
 1 -2 -1 39.49 2.69
 -1 2 1 36.96 2.76
 1 -2 -1 39.91 3.09
 -1 -2 1 39.23 1.83
 1 -2 -1 38.2 2.32
 -1 2 0 831.69 9.16
 1 -2 0 839.87 12.96
 1 -2 0 830.44 9.97
 1 2 0 830 9.64
 1 2 0 812.11 9.16
 -1 -2 0 809.53 9.52
 -1 2 -1 162.38 4.84
 1 2 1 167.5 5.05
 1 -2 1 180.51 5.29
 -1 -2 -1 154.24 5.67
 -1 -2 -1 161.79 4.96
 -1 -2 -2 734.98 13.27
 -1 2 -2 759.78 13.34
 1 2 2 743.28 13.08
 -1 -2 -2 751.39 13.64
 1 2 3 2.14 0.81
 -1 -2 -3 1.13 0.57
 1 2 4 523.95 11.81
 1 2 5 1.64 0.75
 1 -2 6 198.09 11.43
 1 2 6 201.59 11.41
 1 2 7 4.76 1.88
 1 -2 7 4.54 2.03
 1 -2 8 205 13.55
 1 2 8 203.6 13.21
 1 -2 9 50.28 7.24
 1 2 9 56.65 7.58
 1 2 10 29.48 5.74
 1 -2 10 29.91 5.81
 1 -2 11 -0.24 1.08
 1 2 11 -0.02 2.4
 1 -2 12 6.62 2.66
 1 2 12 4.52 3.37
 1 2 13 15.11 4.33
 1 -2 13 20.74 5.63
 -1 2 -13 15.07 4.86
 -1 -2 -13 11.84 4.24
 1 -2 14 -1.03 2.3
 1 2 14 1.93 2.35
 -1 -2 -14 2.09 2
 -1 2 -14 0.38 1.3
 -1 2 -15 -4.42 3.03
 1 2 15 1.86 2.43
 -1 -2 -15 0.48 0.9
 1 -2 15 -1.64 1.94
 -1 3 15 6.48 3.82
 -1 -3 15 0.93 2.21
 -1 3 14 -0.04 1.48
 -1 -3 14 -4.07 2.82
 -1 3 13 0.06 1.34
 -1 -3 13 -1.54 2.15
 -1 3 12 -1.08 1.6
 -1 -3 12 2.19 2.11
 -1 3 11 0.67 0.92
 -1 -3 11 -1.03 1.91
 -1 3 10 82.79 9.68
 -1 -3 10 80.51 9.77
 -1 -3 9 75.7 9.01
 -1 3 9 80.03 8.93
 -1 3 8 17.45 3.93
 -1 -3 8 15.1 3.74
 -1 3 7 13.08 3.1
 -1 -3 7 12.38 3.16
 -1 -3 6 53.89 5.71
 -1 3 6 53.64 5.85
 1 -3 -6 56.45 3.63
 -1 -3 5 156.79 9.2
 -1 3 5 157.16 8.99
 -1 -3 4 11.36 2.22
 -1 3 4 13 2.24
 -1 3 3 731.48 15.11
 -1 3 3 703.54 16.83
 1 -3 -3 778.38 15.41
 -1 -3 3 698.79 14.72
 1 3 -3 768.59 15.24
 1 3 -3 709.8 11.24
 -1 -3 2 916.69 14.17
 1 -3 -2 1025.19 18.11
 -1 3 2 979.08 14.77
 1 3 -2 959.4 9.52
 1 -3 -2 980.22 14.75
 -1 3 2 991.88 18.35
 1 3 -2 1013.13 14.88
 1 -3 -1 939.13 11.92
 -1 3 1 950.64 15.89
 1 3 -1 984.33 10
 1 -3 -1 990.31 11.91
 1 -3 -1 975.25 14.75
 1 3 -1 1024.2 11.89
 1 3 -1 991.33 12.1
 1 -3 0 1358.16 14.4
 1 3 0 1352.1 11.93
 -1 3 0 1330.67 18.14
 1 3 0 1349.13 12.73
 -1 -3 0 1326.87 13.9
 1 -3 0 1343.69 12.44
 -1 -3 0 1354.09 12.22
 -1 3 0 1292.99 14.49
 -1 3 -1 117.01 3.94
 -1 3 -1 128.08 4.19
 -1 -3 -1 131.67 5.27
 1 -3 1 135.03 4.66
 1 3 1 132.98 4.5
 -1 -3 -1 139.34 4.61
 -1 3 -1 120.7 5.54
 -1 3 -2 879.58 14.16
 -1 -3 -2 919.32 15.9
 -1 -3 -2 882.91 16.15
 -1 -3 -2 887.9 14.79
 -1 -3 -3 1806.18 23.85
 -1 -3 -4 -1.59 1.07
 1 -3 5 10.28 2.53
 1 3 6 95.99 7.82
 1 -3 6 96.81 7.91
 1 -3 7 4.92 2.32
 1 3 7 2.56 1.16
 1 3 8 1.95 1.49
 1 -3 8 3.2 2.09
 1 -3 9 7.65 2.74
 1 3 9 10.68 3.19
 1 -3 10 67.24 9.13
 1 3 10 64.7 8.62
 1 -3 11 8.46 3.55
 1 3 11 7.59 3.07
 1 3 12 4.23 1.79
 1 -3 12 4.87 2.84
 -1 3 -13 1.65 2.26
 1 -3 13 0.12 1.1
 1 3 13 1.26 1.09
 -1 3 -14 18.05 5.75
 1 3 14 21.72 5.98
 -1 -3 -14 18.3 5.74
 1 -3 14 26.68 7.32
 1 -3 15 0 1.64
 -1 3 -15 -1.65 1.94
 -1 4 15 2.34 2.28
 -1 -4 15 2.23 2.68
 -1 -4 14 -0.81 1.44
 -1 4 14 0.03 1.42
 -1 -4 13 5.27 2.82
 -1 4 13 2.04 2.37
 -1 4 12 11.86 4.21
 -1 -4 12 16.66 4.58
 -1 -4 11 74.38 9.88
 -1 4 11 73.18 9.62
 -1 -4 10 76.99 9.71
 -1 4 10 81.4 9.47
 -1 4 9 3.16 2.7
 -1 -4 9 1.67 1.44
 -1 4 8 0.62 1.38
 -1 -4 8 0.31 1.14
 1 -4 -7 3.17 1.25
 -1 -4 7 0.65 1.49
 -1 4 7 -0.03 1.33
 1 -4 -6 15.65 2.25
 -1 -4 6 15.5 3.21
 -1 4 6 15.74 3.03
 -1 -4 5 555.15 17.44
 -1 4 5 566.93 17.25
 -1 -4 4 30.07 3.46
 -1 4 4 35.72 3.92
 1 4 -3 678.63 9.39
 -1 4 3 711.68 14.9
 1 -4 -3 722.66 15
 -1 -4 3 638.5 14.26
 1 4 -3 693.5 14.6
 -1 4 3 674.06 17.38
 -1 4 2 16.49 2.99
 -1 4 2 14.61 2
 1 -4 -2 7.9 1.18
 1 4 -2 9.66 1.41
 -1 -4 2 6.51 1.18
 1 4 -1 841.77 10.52
 1 -4 -1 824.92 10.96
 -1 4 1 809.59 16.33
 1 -4 -1 869.24 10.73
 1 -4 -1 816.71 14.51
 1 4 -1 853.71 11.77
 1 4 -1 883.12 11.04
 1 4 0 39.93 2.59
 -1 -4 0 37.18 1.94
 1 -4 0 49.53 3.91
 -1 4 0 41.27 1.92
 1 4 0 42.8 2.08
 -1 4 0 45.33 3.72
 1 -4 0 38.1 2.6
 -1 -4 0 43.26 2.91
 1 -4 0 43.55 2.07
 -1 -4 -1 301.25 8.66
 -1 4 -1 292.28 6.28
 -1 4 -1 290.15 9.46
 -1 4 -1 312.92 6.57
 1 4 1 303.63 8.39
 -1 -4 -2 1578.14 23.1
 -1 -4 -2 1514.75 19.46
 -1 4 -2 1492.21 18.22
 -1 4 -3 933.87 17.44
 -1 -4 -3 929.51 19.01
 -1 -4 -3 960.26 18.43
 -1 -4 -4 355.75 12.02
 1 -4 5 14.14 2.61
 1 4 5 17.74 3.21
 -1 -4 -5 14.9 2.6
 1 4 6 10.89 2.71
 1 -4 6 11.55 2.75
 1 -4 7 -0.58 1.22
 1 4 7 -1.2 1.9
 1 4 8 3.07 1.53
 1 -4 8 5.09 2.24
 1 4 9 14.38 3.59
 1 -4 9 12.71 3.77
 1 4 10 4.19 2.21
 1 -4 10 4.56 2.72
 1 4 11 -1.1 1.99
 1 -4 11 -3.51 2.55
 1 4 12 -1.5 1.28
 -1 -4 -12 1.59 1.73
 -1 4 -12 -1.24 1.58
 1 -4 12 -2.02 1.48
 -1 -4 -13 1.97 1.72
 -1 4 -13 -0.86 0.87
 1 -4 13 -0.83 1.78
 1 4 13 1.15 1.59
 1 -4 14 0.33 0.76
 1 4 14 1.05 1.54
 -1 -4 -14 0.75 1.25
 -1 -5 14 10.12 4.48
 -1 5 14 11.69 4.42
 -1 5 13 -3.22 2.91
 -1 -5 13 -3.37 2.41
 -1 -5 12 12.61 4.55
 -1 5 12 22.45 5.4
 -1 -5 11 46.89 7.46
 -1 5 11 54.86 8.25
 -1 5 10 23.04 5
 -1 -5 10 24.9 5.14
 -1 5 9 3.15 0.9
 -1 -5 9 4.66 1.81
 1 -5 -8 44.01 4.55
 -1 5 8 39.37 5.93
 -1 -5 8 38.98 6.37
 1 -5 -7 3.49 1.47
 -1 -5 7 1.4 1.24
 -1 5 7 2.32 1.53
 -1 5 6 677.29 20.72
 -1 -5 6 683.28 21.15
 -1 -5 5 20.15 3.21
 -1 5 5 22.93 3.51
 1 5 -4 211.43 6.03
 -1 -5 4 216.81 9.33
 -1 5 4 207.1 11.02
 -1 5 4 222.13 9.46
 1 -5 -3 3.97 1.08
 -1 5 3 5.05 1.3
 1 5 -3 3.72 1.03
 -1 -5 3 4.27 1.13
 -1 5 3 4.8 1.74
 1 -5 -2 484.36 10.37
 1 5 -2 553.62 10.62
 1 5 -2 537.74 11.29
 -1 5 2 527.68 15.29
 1 5 -1 3.32 0.69
 1 -5 -1 1.88 0.4
 1 -5 -1 0.99 0.25
 1 -5 -1 0.49 0.39
 -1 5 1 -0.55 1.23
 1 5 -1 1.85 0.55
 1 5 0 29.12 2.62
 1 -5 0 15.37 1.15
 1 5 0 30.48 1.66
 1 -5 0 30.48 2.62
 -1 5 0 28.82 1.48
 -1 -5 0 29.19 1.67
 -1 5 0 31.11 3.4
 -1 -5 0 15.7 2.05
 -1 5 -1 68.34 3.24
 1 5 1 72.22 4.54
 -1 5 -1 71.17 2.97
 -1 5 -1 68.32 4.89
 -1 -5 -1 74.52 3.3
 -1 5 -2 3658.92 27.94
 -1 5 -2 3768.13 38.8
 -1 5 -3 110.53 5.82
 -1 -5 -3 122.69 6.54
 1 -5 4 507.33 15.05
 1 5 4 505.84 14.61
 -1 5 -4 489.38 14.26
 -1 -5 -4 460.14 15.18
 1 -5 5 0.72 0.73
 -1 -5 -5 1.92 0.69
 1 5 5 0.55 0.72
 1 5 6 395.94 15.88
 -1 -5 -6 451.09 15.42
 1 -5 6 426.45 17.06
 1 -5 7 10.8 2.92
 1 5 7 10.14 2.82
 1 5 8 6.13 2.4
 1 -5 8 4.15 2
 1 -5 9 14.44 3.93
 1 5 9 15.21 3.73
 1 5 10 225.6 16.13
 1 -5 10 213.26 15.75
 -1 -5 -11 44.01 7.6
 -1 5 -11 45.19 7.56
 1 -5 11 47.88 7.47
 1 5 11 57.1 8.44
 1 5 12 12.61 4.08
 1 -5 12 7.06 3.19
 -1 -5 -12 8.56 3.7
 -1 5 -12 7.6 3.18
 -1 -5 -13 -2.41 2.09
 -1 5 -13 1.21 2
 1 5 13 1.14 1.76
 1 -5 13 -1.11 1.57
 1 5 14 -1.92 1.81
 1 -5 14 -1.91 1.98
 -1 5 -14 -0.44 1.41
 -1 -5 -14 1.29 2.47
 -1 -6 14 0.79 1.35
 -1 6 14 0.39 1.35
 -1 -6 13 -1.38 2.72
 -1 6 13 2.89 2.17
 -1 6 12 1.6 1.15
 -1 -6 12 0.26 1.26
 -1 6 11 24.72 5.6
 -1 -6 11 23.02 5.41
 -1 6 10 70.76 8.84
 -1 -6 10 62.64 8.44
 -1 -6 9 0.19 0.7
 -1 6 9 1.57 0.67
 1 -6 -9 1.36 1.16
 1 -6 -8 37.43 4.38
 -1 6 8 31.8 5.23
 -1 -6 8 32.59 5.61
 1 -6 -7 48.42 4.92
 -1 6 7 61.51 6.65
 -1 -6 7 51.27 5.98
 -1 6 6 211.71 11.4
 1 6 -6 217.9 8.28
 -1 -6 6 212.07 11.55
 1 6 -5 127.33 5.12
 -1 6 5 120.16 7.68
 -1 -6 5 121.4 7.87
 1 6 -4 14.34 1.1
 -1 -6 4 13.18 2.3
 -1 6 4 16.29 2.68
 -1 6 4 13.98 3.01
 -1 6 3 141.53 6.75
 1 6 -3 155.04 7.09
 -1 6 3 143.02 9.04
 -1 -6 3 137.33 6.46
 1 -6 -2 333.98 8.74
 1 6 -2 382.47 8.64
 1 6 -2 399.89 10.53
 -1 6 2 406.58 14.33
 1 6 -1 114.14 5.62
 1 -6 -1 100.8 3.38
 1 6 -1 103.97 3.15
 -1 6 1 104.5 6.7
 1 -6 -1 109.74 5.94
 1 -6 -1 117.32 3.84
 -1 6 0 21.92 3.09
 -1 -6 0 10.81 1.87
 1 -6 0 20.33 2.24
 1 6 0 19.79 2.34
 -1 -6 -1 209.13 5.46
 -1 -6 -1 203.91 5.37
 1 6 1 206.36 8.56
 -1 6 -1 201.87 4.61
 -1 6 -1 199.99 9.06
 -1 6 -2 11.65 2.21
 1 6 2 8.83 1.77
 -1 6 -2 12.24 1.6
 -1 6 -2 3.63 0.75
 -1 -6 -2 8.92 1.36
 -1 6 -3 2.85 0.57
 1 -6 3 6.47 1.59
 1 6 3 6.87 1.33
 -1 6 -3 7.75 1.47
 -1 6 -3 5.78 1.48
 -1 -6 -3 7.09 1.66
 1 6 4 30.48 3.47
 -1 -6 -4 26.43 3.88
 -1 -6 -4 28.84 3.61
 1 -6 4 27.02 3.41
 -1 6 -4 29.43 3.48
 1 -6 5 92.08 6.99
 -1 -6 -5 77.3 6.8
 1 6 5 84.5 6.48
 -1 6 -5 83.53 6.64
 -1 -6 -5 86.09 6.99
 -1 -6 -6 32.73 4.93
 1 6 6 31.47 4.38
 1 -6 6 31.35 4.49
 -1 6 -6 33.35 4.64
 -1 -6 -6 31.91 4.15
 -1 -6 -7 5.08 1.8
 1 -6 7 5.21 2.14
 1 6 7 6.26 2.11
 1 6 8 0.79 0.6
 1 -6 8 0.81 1.87
 -1 6 -9 1.79 2.09
 1 -6 9 0.54 1.38
 -1 -6 -9 1.61 1.52
 1 6 9 0.09 1.08
 -1 6 -10 0.32 0.86
 -1 -6 -10 -2.54 2.3
 1 6 10 -0.85 1.42
 1 -6 10 1.19 1.6
 -1 -6 -11 14.03 4.29
 1 6 11 14.05 4.29
 1 -6 11 12.63 4.41
 -1 6 -11 13.13 4.11
 -1 6 -12 -0.91 2.05
 1 -6 12 -2.47 2.56
 1 6 12 1.22 1.14
 -1 -6 -12 2.53 1.93
 -1 6 -13 -0.93 0.88
 -1 -6 -13 0.84 1.32
 1 -6 13 -2.33 2.87
 1 6 13 3.46 2.55
 1 6 14 1.74 1.96
 -1 6 -14 -4.95 3
 1 -6 14 -2.5 2.3
 -1 -6 -14 0.28 1.68
 -1 7 14 3.32 2.6
 -1 -7 14 -0.24 0.88
 -1 7 13 1.06 1.58
 -1 -7 13 2.04 2.45
 -1 7 12 1.26 1.84
 -1 -7 12 -3.62 2.86
 -1 7 11 3.42 1.82
 -1 -7 11 5.98 2.68
 -1 -7 10 6.11 2.66
 -1 7 10 2.81 1.74
 -1 -7 9 38.11 6.02
 1 -7 -9 44.52 5.56
 -1 7 9 41.15 6.25
 1 -7 -8 33.2 4.43
 -1 -7 8 34.27 5.31
 1 7 -8 37.82 4.11
 -1 7 8 36.14 5.48
 1 7 -7 29.9 3.18
 -1 -7 7 28.15 4.53
 -1 7 7 31.41 4.85
 1 7 -6 73.62 4.14
 -1 7 6 71.89 6.67
 -1 -7 6 68.45 6.7
 -1 -7 5 9.82 2.27
 1 7 -5 9.41 0.93
 -1 7 5 11.09 2.43
 -1 -7 4 13.2 2.2
 1 7 -4 14.61 2.45
 -1 7 4 11.3 2.96
 -1 7 4 13.57 2.33
 1 7 -3 91.26 5.65
 1 7 -3 84.54 4.86
 -1 7 3 84.8 7.44
 1 7 -2 242.77 6.59
 -1 7 2 266.74 12.2
 1 7 -2 263.66 9.46
 -1 7 1 7.36 1.86
 1 7 -1 7.53 1.57
 1 -7 -1 9.64 1.9
 1 7 0 147.22 7.03
 -1 7 0 159.12 8.82
 1 -7 0 168.12 6.85
 1 7 1 51.81 4.61
 1 7 1 51.2 2.15
 -1 7 -1 48.13 4.91
 -1 -7 -1 45.99 2.31
 -1 7 -2 222.34 10.5
 -1 -7 -2 234.29 7.86
 1 7 2 230.16 10.29
 -1 7 -2 236.67 6.72
 1 -7 2 246.11 7
 1 7 2 241.73 6.87
 -1 -7 -3 212.79 8.74
 -1 7 -3 214.03 7.94
 1 7 3 221.98 8.22
 1 -7 3 233.12 8.63
 -1 7 -3 205.14 10.41
 -1 -7 -4 7.72 1.99
 1 7 4 7.64 1.82
 1 -7 4 7.25 1.69
 -1 7 -4 3.49 0.72
 -1 7 -4 7.93 2.22
 -1 7 -4 8.34 1.86
 1 -7 5 16.62 3.01
 -1 -7 -5 14.41 3.16
 -1 7 -5 19.43 3.14
 -1 -7 -5 15.57 2.92
 1 7 5 16.91 2.78
 1 -7 6 70.88 7.02
 -1 -7 -6 63.21 6.32
 1 7 6 64.32 6.12
 -1 -7 -6 69.66 7.08
 -1 7 -6 68.13 6.45
 -1 -7 -7 0.76 1.23
 -1 7 -7 0.15 0.69
 1 -7 7 2.87 1.11
 -1 -7 -7 0.44 0.71
 1 7 7 3.38 1.69
 -1 -7 -8 24.76 4.86
 1 7 8 30.92 5.04
 1 -7 8 28.35 5.16
 -1 7 -8 24.86 4.65
 -1 -7 -8 29.5 4.7
 1 7 9 118.77 10.49
 -1 7 -9 99.49 10.08
 1 -7 9 109.81 10.79
 -1 -7 -9 108.15 10.8
 1 -7 10 -1.71 1.46
 -1 -7 -10 1.42 1.65
 1 7 10 0.49 0.85
 -1 7 -10 -0.92 0.98
 -1 7 -11 21.11 5.06
 1 -7 11 20.49 5.21
 1 7 11 17.71 4.52
 -1 -7 -11 18.68 5.12
 1 7 12 3.75 2.24
 -1 -7 -12 0.32 0.93
 -1 7 -12 0.45 0.94
 1 -7 12 1.13 1.27
 -1 -7 -13 0.47 1.81
 -1 7 -13 -0.4 0.89
 1 -7 13 1.09 2.07
 1 7 13 -2.1 2.21
 1 7 14 4.98 3.03
 -1 -7 -14 2.02 3.08
 1 -7 14 -0.35 1.72
 -1 7 -14 0.05 1.32
 1 -8 -14 0 0.66
 1 8 -14 -0.98 2.17
 -1 -8 14 -2.36 2.75
 -1 8 14 2.57 2.33
 -1 8 13 -0.44 1.33
 -1 -8 13 -0.23 0.95
 -1 -8 12 1.32 1.19
 -1 8 12 1.03 1
 -1 8 11 0.66 1.24
 -1 -8 11 1.57 1.8
 -1 -8 10 2.87 1.23
 -1 8 10 4.94 2.17
 -1 8 9 3.58 1.96
 -1 -8 9 2.17 1.45
 1 -8 -9 1.41 1.09
 -1 8 8 -0.64 1.08
 -1 -8 8 1.18 1.22
 1 -8 -8 1.48 1.62
 -1 -8 7 -0.51 1.06
 -1 8 7 0.7 0.95
 -1 -8 6 14.53 3.01
 -1 8 6 11.46 2.48
 1 8 -5 114.71 7.67
 -1 8 5 117.23 7.77
 -1 -8 5 99.31 6.99
 1 8 -4 89.2 6.32
 -1 8 4 106.87 6.51
 -1 8 4 92.91 8.25
 -1 8 3 244.68 13.13
 1 8 -3 227.94 9.61
 -1 8 2 -0.28 0.86
 1 8 -2 -0.33 0.41
 1 -8 -2 0.35 0.31
 1 -8 -2 1.47 0.81
 1 -8 -1 221.13 9.36
 -1 8 1 195.84 10.45
 -1 -8 1 197.21 4.84
 1 8 -1 202.22 8.83
 -1 8 0 29.96 4.03
 1 -8 0 32.27 3.13
 1 8 0 29.04 3.36
 1 8 1 188.83 9.42
 -1 8 -1 176.22 9.71
 1 -8 2 122.41 4.48
 1 8 2 141.56 8.51
 1 8 2 144.61 5.09
 -1 8 -2 134.29 4.49
 -1 8 -2 135.52 8.63
 -1 -8 -2 138.19 5.55
 -1 -8 -3 33.94 3.5
 1 -8 3 32.29 3.16
 -1 8 -3 36.64 3.17
 1 8 3 40.04 3.45
 -1 8 -3 36.46 4.48
 -1 8 -4 15.09 2.34
 -1 8 -4 13.46 2.98
 -1 -8 -4 13.97 2.43
 1 -8 4 15 2.57
 1 8 4 15.75 2.53
 -1 8 -5 53.26 2.72
 -1 -8 -5 71.07 6.44
 -1 -8 -5 65.53 7.05
 1 -8 5 70.05 5.99
 1 8 5 72.18 6.03
 -1 8 -5 71.33 5.87
 -1 8 -5 73.7 7.04
 -1 -8 -6 63.28 6.88
 1 8 6 63.07 6.27
 1 -8 6 56.16 6.07
 -1 -8 -6 56.1 6.1
 -1 8 -6 63.42 6.22
 -1 -8 -7 10.2 2.8
 1 -8 7 10.2 2.81
 -1 -8 -7 8.09 2.18
 -1 8 -7 10.06 2.88
 1 8 7 9.25 2.65
 -1 8 -8 31.08 5.18
 -1 -8 -8 30.17 4.93
 -1 -8 -8 29.18 5.2
 1 8 8 27.91 4.71
 1 -8 8 31.42 5.32
 -1 -8 -9 5.2 2.82
 1 -8 9 4.27 2.85
 -1 8 -9 3.45 2.29
 1 8 9 0.42 0.76
 -1 8 -10 0.67 1.03
 1 -8 10 0.51 1.19
 1 8 10 0.07 1.17
 -1 -8 -10 1.8 1.26
 -1 8 -11 2.86 2.28
 -1 -8 -11 -1.04 1.74
 1 -8 11 -0.74 0.78
 1 8 11 0.7 1.71
 -1 8 -12 2.93 1.94
 1 -8 12 4.78 2.98
 1 8 12 4.17 1.97
 -1 -8 -12 11.3 4.34
 -1 8 -13 3.06 2.46
 1 -8 13 6.44 3.87
 -1 -8 -13 1.28 2.42
 1 8 13 2.33 1.71
 -1 -8 -14 -0.78 1.27
 1 -8 14 -2.57 2.35
 -1 8 -14 0.08 1
 -1 9 14 1.43 1.37
 -1 -9 14 1.3 1.42
 1 -9 -14 -0.71 1.23
 1 9 -14 -0.22 1.6
 -1 -9 13 3.28 2.99
 1 -9 -13 1.92 2.67
 -1 9 13 -1.66 1.92
 1 9 -13 1.21 1.9
 -1 9 12 -1.84 1.78
 -1 -9 12 2.58 2.3
 -1 9 11 7.7 2.9
 -1 -9 11 5.57 2.75
 -1 -9 10 17.83 4.74
 -1 9 10 25.26 5.12
 -1 -9 9 3.55 1.94
 1 -9 -9 4.04 1.92
 -1 9 9 8.43 2.9
 -1 9 8 0.95 1.17
 1 -9 -8 4.26 1.99
 -1 -9 8 2.86 0.93
 -1 9 7 2.99 1.54
 -1 -9 7 -0.48 0.78
 -1 -9 6 0.87 1.09
 -1 9 6 1.19 0.74
 1 9 -6 1.25 1.6
 -1 9 5 88.42 6.65
 -1 9 5 82.18 8.55
 1 9 -5 88.06 6.97
 -1 9 4 42.66 6.02
 1 9 -4 31.62 3.34
 1 9 -4 44.91 4.66
 -1 9 3 -0.98 1.24
 1 9 -3 -0.17 0.26
 1 -9 -3 -0.57 0.47
 1 9 -3 -0.64 0.93
 1 9 -2 17.24 1.21
 1 9 -2 14.36 1.1
 1 -9 -2 16.26 1.34
 1 -9 -2 10.97 1.27
 -1 9 2 15.32 3.03
 1 9 -2 15.87 2.62
 1 -9 -2 20.77 3.35
 1 9 -1 7 1.69
 -1 -9 1 6.96 0.9
 1 -9 -1 3.74 0.92
 -1 9 1 4.08 1.06
 1 -9 0 205.14 8.44
 1 9 0 211.96 9.85
 -1 9 0 209.31 11.28
 -1 9 -1 58.58 5.84
 1 9 1 67.31 5.93
 1 -9 2 12.92 1.13
 -1 9 -2 8.15 0.83
 1 9 2 18.05 1.5
 -1 -9 -2 10.13 1.24
 1 9 2 17 3.08
 -1 9 -2 11.81 2.66
 -1 9 -3 1.92 0.79
 -1 9 -3 0.05 0.67
 1 9 3 0.25 0.25
 -1 -9 -3 1.85 1.12
 1 -9 3 -0.18 0.23
 1 -9 4 45.02 4.31
 -1 9 -4 46.72 4.05
 -1 -9 -4 43.28 4.43
 -1 9 -4 47.57 5.62
 1 9 4 49.26 4.34
 1 -9 5 8.79 2.24
 -1 9 -5 11.22 3.05
 -1 -9 -5 9.26 2.41
 -1 -9 -5 10.77 3.12
 1 9 5 11.86 2.41
 -1 9 -5 8.19 2.08
 -1 9 -6 209.98 13.04
 -1 -9 -6 209.89 13.53
 -1 -9 -6 227.71 13.06
 1 -9 6 233.36 12.71
 1 9 6 221.43 11.63
 -1 9 -6 214.11 11.41
 -1 -9 -7 2.51 1.32
 -1 9 -7 2.22 0.96
 1 9 7 2.59 1.35
 1 -9 7 1.91 1.04
 -1 -9 -8 5.13 2.17
 -1 9 -8 5.61 2.46
 1 9 8 6.05 2.43
 -1 -9 -8 6.72 2.48
 1 -9 8 3.69 1.41
 -1 -9 -9 11.2 3.43
 -1 -9 -9 12.39 3.4
 1 -9 9 9.39 3.33
 -1 9 -9 12.35 3.48
 1 9 9 12.47 3.26
 1 -9 10 -1.09 1.61
 -1 9 -10 0.55 1.16
 1 9 10 0.65 0.63
 1 -9 11 2.82 2.17
 -1 -9 -11 3.4 2.22
 1 9 11 2.23 1.79
 -1 9 -11 0.78 1.54
 1 -9 12 2.8 2.16
 -1 -9 -12 -1.8 1.73
 1 9 12 1.59 2.01
 -1 9 -12 -0.51 0.52
 -1 -9 -13 3.44 3.41
 1 -9 13 1.93 2.4
 1 9 13 -1.31 2.05
 -1 9 -13 -0.96 1.63
 1 -9 14 1.05 1.4
 -1 -9 -14 0.53 1.85
 -1 9 -14 -0.25 1.33
 1 9 14 4.06 3.06
 -1 10 12 3.33 2.19
 -1 10 11 21.5 5.01
 -1 -10 11 18.34 5.02
 -1 10 10 20.32 4.67
 -1 -10 10 15.99 4.48
 1 -10 -9 20.77 4.34
 -1 10 9 23.42 4.66
 -1 -10 9 23.69 4.93
 1 10 -8 20.62 4.26
 -1 -10 8 19.57 4.25
 -1 10 8 18.62 3.84
 1 -10 -8 17.01 4.01
 -1 10 7 7.28 2.19
 1 10 -7 8.21 2.59
 -1 -10 7 6.86 2.3
 -1 10 6 0.83 1.16
 1 10 -6 -1.21 1.29
 -1 10 5 8.84 3.15
 1 10 -5 8.63 2.15
 1 10 -4 6.37 1.78
 -1 10 4 5.16 2.26
 1 -10 -4 4.9 1.27
 1 -10 -3 7.73 2.47
 1 -10 -3 7.75 1.46
 1 10 -3 7.51 1.13
 -1 10 3 5.22 2.21
 1 10 -3 6.37 1.75
 -1 10 2 54.91 6.59
 1 10 -2 62.93 5.65
 1 -10 -2 54.62 5.43
 -1 10 1 9.75 2.6
 -1 -10 1 9.14 1
 1 -10 -1 11.1 2.21
 1 10 -1 9.84 2.17
 -1 10 0 0.24 0.75
 1 10 0 -0.56 0.55
 1 -10 0 -0.12 0.33
 -1 10 -1 5.18 1.79
 1 10 1 5.1 1.81
 1 10 2 20.99 3.63
 -1 10 -2 22.4 3.88
 1 10 3 1.75 0.65
 -1 10 -3 2.17 1.58
 -1 10 -3 1 0.43
 -1 -10 -3 0.9 0.35
 1 -10 3 0.85 0.37
 -1 10 -4 10.39 2.75
 -1 10 -4 11.89 1.88
 -1 -10 -4 12.82 2.3
 1 -10 4 13.66 2.2
 1 10 4 12.57 1.95
 -1 10 -5 118.85 7.14
 -1 10 -5 125.39 9.8
 1 10 5 135.43 8.2
 -1 -10 -5 126.57 8.52
 1 -10 5 134.06 8.2
 1 -10 6 0.05 0.72
 1 10 6 0.75 0.85
 -1 -10 -6 0.98 1.37
 -1 10 -6 -0.1 1
 -1 -10 -6 0.63 1.14
 -1 10 -6 1.02 0.8
 -1 -10 -7 2.97 1.9
 1 10 7 0.54 0.88
 -1 10 -7 0.28 1.09
 -1 10 -7 0.85 1.29
 -1 -10 -7 0.06 0.97
 1 -10 7 -1.57 1.31
 -1 10 -8 26.09 4.99
 1 10 8 20.93 4.25
 -1 -10 -8 18.26 4.29
 -1 -10 -8 20.11 4.51
 -1 10 -8 24.47 4.52
 1 -10 8 19.2 4.46
 1 10 9 13.67 3.56
 -1 -10 -9 11 3.3
 -1 10 -9 14.4 3.73
 1 -10 9 13.85 3.6
 -1 -10 -9 13.04 3.51
 -1 10 -10 -0.21 1.39
 1 10 10 3.92 2.27
 1 -10 10 1.4 1.83
 -1 -10 -10 -0.48 0.85
 -1 -10 -11 11.41 3.96
 1 10 11 8.82 3.03
 1 -10 11 7.23 3.18
 1 10 12 4.07 2.39
 1 -11 -9 1.21 0.77
 1 -11 -8 4.11 2.23
 1 11 -7 7.79 2.44
 1 11 -6 14.78 3.14
 1 11 -5 1.84 0.97
 -1 11 5 4.4 2.21
 1 11 -4 58.98 5.96
 1 -11 -4 50.14 6.47
 -1 11 4 49.62 6.83
 1 11 -3 -1.11 0.95
 1 -11 -3 -0.31 0.61
 -1 11 3 0.71 1.03
 1 -11 -2 2.88 1.18
 1 11 -2 1.1 0.76
 -1 11 2 2.43 1.89
 -1 11 1 65.92 7.03
 1 11 -1 72.73 6.43
 1 -11 -1 77.89 6.4
 1 -11 0 73.05 5.36
 -1 -11 0 79.1 4.89
 1 11 0 79.51 7.04
 -1 11 0 63.62 6.72
 1 11 1 50.71 5.61
 -1 11 -1 45.3 5.67
 -1 11 -2 12.16 3
 1 11 2 11.06 2.59
 -1 11 -3 48.28 5.93
 -1 11 -4 17.88 3.45
 -1 11 -5 13.5 3.27
 -1 11 -6 -0.22 1.11
 -1 -11 -6 1.43 1.03
 -1 -11 -7 3.49 1.63
 -1 11 -7 5.04 2.09
 -1 11 -8 0.31 1.04
 -1 -11 -8 -2.24 1.86
 -1 -11 -9 2.97 2.03
 -1 11 -9 3.36 1.83
 -1 11 -10 -1.03 1.85
 1 -12 -8 0.07 0.81
 1 -12 -6 1.84 1.78
 1 12 -5 42.48 5.28
 1 -12 -5 37.46 6
 -1 12 4 18.1 4.1
 1 -12 -4 18.72 4.09
 1 12 -4 19.92 3.59
 -1 12 3 -0.88 1.04
 1 -12 -3 0.82 1.06
 1 12 -3 0.38 0.73
 1 12 -2 1.88 1.26
 -1 12 2 0.96 0.84
 1 -12 -2 1.25 0.98
 1 12 -1 18.4 3.33
 -1 12 1 18.47 3.92
 1 -12 -1 22.15 3.4
 -1 12 0 0.79 0.73
 1 12 0 1.99 0.83
 -1 12 -1 45.91 5.93
 1 12 1 50.55 6.14
 1 12 2 36.16 5.21
 -1 12 -2 31.07 4.97
 -1 12 -3 16.68 3.61
 -1 12 -4 8.66 2.78
 -1 12 -5 10.97 2.95
 -1 12 -6 1.68 1.53
 -1 -12 -6 -0.95 1.68
 -1 12 -7 1.74 1.32
 -1 -12 -7 3.19 1.95
 -1 -12 -8 0.2 0.9
 -1 12 -8 2.29 1.53
 -1 12 -9 6.01 2.69
 -1 -12 -9 1.81 1.86
 1 -13 -11 0.31 1.96
 1 -13 -10 0.53 1.51
 1 -13 -9 -0.68 1.28
 1 -13 -8 -0.69 0.89
 1 -13 -8 -1.31 1.44
 1 -13 -7 2.03 1.5
 1 -13 -6 9.02 3.01
 1 -13 -5 -0.68 1.39
 1 -13 -4 76.78 8.44
 -1 13 4 67.63 8.45
 1 13 -3 22.96 3.88
 1 -13 -3 23.21 4.48
 -1 13 3 21.77 4.64
 -1 13 2 0.46 1.06
 1 13 -2 0.59 1.09
 1 13 -1 6.7 2.28
 -1 13 1 6.33 2.57
 -1 13 0 0.19 0.64
 1 13 0 0.21 1.02
 -1 13 -1 0.5 1.16
 1 13 1 1.03 1.13
 -1 13 -2 0.1 1.03
 1 13 2 2.99 1.59
 -1 13 -3 12.28 3.22
 -1 13 -4 9.71 2.82
 -1 -13 -5 1.48 1.66
 -1 13 -5 -0.35 0.74
 -1 13 -6 3.31 2.04
 -1 -13 -6 0.01 1.45
 -1 -13 -7 3.76 2.21
 -1 13 -7 3.63 1.78
 -1 -13 -8 5.24 2.49
 -1 -13 -9 0.27 0.74
 1 -14 -10 -2.01 1.91
 1 -14 -9 -1.73 2
 1 -14 -8 -4.78 2.94
 1 -14 -8 11.67 4.26
 1 -14 -7 2.48 1.78
 1 -14 -6 6.68 2.85
 -1 14 4 5.66 2.7
 -1 14 3 -0.15 0.75
 -1 14 2 4.09 2.01
 -1 14 1 1.26 1.55
 1 14 0 3.71 1.91
 -1 14 0 3.07 2.06
 -1 14 -1 4.11 1.76
 1 14 1 3.36 1.82
 -1 14 -2 1.35 0.86
 1 14 2 -0.91 1.32
 -1 14 -3 13.25 3.2
 -1 14 -4 10.26 3.1
 -1 14 -5 -2.64 1.91
 -1 -14 -5 -0.77 1.59
 -1 -14 -6 2.56 2.15
 -1 -14 -7 -1.48 1.66
 -1 -14 -8 -1.12 1.38
 -1 -14 -9 2.22 1.99
 1 -15 -10 -2.31 2.05
 1 -15 -9 0.79 1.32
 1 -15 -8 2.84 2.42
 -1 15 4 0.27 0.55
 -1 15 3 7.38 2.83
 -1 15 2 -0.47 1.06
 -1 15 1 -0.54 1.71
 -1 15 0 -1.18 1.71
 -1 15 -1 0.21 1
 -1 15 -2 2.88 1.54
 -1 15 -3 2.58 1.79
 -1 -15 -5 -1.22 1.5
 -1 -15 -6 1.2 1.47
 -1 -15 -7 8.74 3.95
 -1 -15 -8 -0.93 1.26
 1 -16 -8 1.8 2.47
 1 -16 -7 2.28 2.54
 -1 16 4 2.7 2
 -1 16 3 0.95 0.95
 -1 16 2 -1.06 1.39
 -1 16 1 0.92 1.59
 -1 16 0 -0.28 1.14
 -1 -16 -4 2.48 2.33
 -1 -16 -5 -0.58 1.15
 -1 -16 -6 -2.07 1.93
 -1 -16 -7 -1.59 1.7
 -1 -16 -8 8.29 4.77
 -1 -17 -4 -0.37 1.01
 -1 -17 -5 0.1 0.83
 2 0 -16 -0.1 1.14
 -2 0 15 -1.01 1.63
 -2 0 14 -0.54 1.15
 -2 0 13 -0.24 0.89
 -2 0 12 -0.91 1.53
 -2 0 11 -4.35 3.04
 -2 0 10 18.43 4.47
 -2 0 9 -2.77 2.79
 -2 0 8 191.14 13.26
 -2 0 7 -0.42 1.23
 -2 0 6 82.06 7.26
 -2 0 5 2.47 1.91
 -2 0 4 239.94 10.31
 2 0 -3 0.17 0.5
 2 0 -3 -0.35 0.62
 2 0 -2 4620.86 35.52
 2 0 -2 4654.38 36.1
 -2 0 2 4612.25 34.43
 -2 0 2 4343.47 30.16
 2 0 -2 4315.68 28.94
 2 0 -2 4375.91 33.82
 2 0 -1 0.21 0.34
 -2 0 1 1.26 0.67
 2 0 -1 0.09 0.52
 2 0 -1 0.33 0.3
 -2 0 1 1.09 0.55
 2 0 0 9999 45.79
 2 0 1 -2.13 1.3
 -2 0 -1 -2.39 1.22
 -2 0 -2 272.9 9.19
 2 0 2 300.51 9.64
 -2 0 -3 -1.03 1.21
 -2 0 -4 1790.97 29.73
 -2 0 -5 -0.63 1.51
 -2 0 -6 183.11 11.26
 -2 0 -7 -0.34 0.99
 -2 0 -8 0.2 1.74
 2 0 8 -0.19 1.74
 2 0 9 2.96 2.02
 -2 0 -9 0.08 0.86
 2 0 10 0.81 1.65
 -2 0 -10 0.51 1.55
 2 0 11 0.31 0.92
 -2 0 -11 -1.21 1.69
 2 0 12 62.17 9.56
 -2 0 -12 62.24 9.47
 -2 0 -13 -0.13 1.71
 2 0 13 -1.68 2.05
 -2 0 -14 19.26 5.98
 2 0 14 11.75 4.29
 2 1 -16 -1.57 2.08
 -2 -1 15 5.77 3.05
 2 1 -15 7.85 3.37
 -2 -1 14 0.19 1.35
 -2 1 14 -0.5 0.8
 -2 -1 13 12.39 4.14
 -2 1 13 11.88 4.03
 -2 1 12 2.12 1.85
 -2 -1 12 -0.21 1.13
 -2 -1 11 44.31 7.4
 -2 1 11 55.01 8.35
 -2 1 10 2.47 1.97
 -2 -1 10 4.89 2.92
 -2 -1 9 313.17 17.63
 -2 1 9 312.52 17.5
 -2 -1 8 335.37 17.25
 -2 1 8 336.07 17.3
 -2 -1 7 -2.1 1.88
 -2 1 7 -0.01 1.76
 -2 1 6 47.35 5.48
 -2 -1 6 44.87 5.29
 -2 1 5 59.73 5.59
 -2 -1 5 61.08 5.59
 2 1 -4 581.65 14.65
 -2 -1 4 557.37 15.81
 -2 1 4 583.55 16.15
 2 -1 -3 50.35 4.08
 2 -1 -3 44.09 3.99
 -2 1 3 43.5 3.8
 -2 -1 3 42.87 3.8
 -2 1 3 43.62 3.92
 2 1 -3 45.51 3.16
 2 1 -3 49.71 3.89
 2 1 -2 647.85 13.37
 2 -1 -2 605.49 12.17
 2 1 -2 601 11.66
 -2 1 2 580.3 12.65
 -2 -1 2 606.88 12.05
 -2 1 2 639.05 13.43
 2 1 -2 635.32 13.17
 2 1 -2 615.13 10.69
 2 -1 -2 628.02 13.17
 2 1 -2 588.94 9.86
 2 -1 -2 597.39 13.31
 2 -1 -2 633.15 13.07
 2 1 -1 12.59 1.24
 2 -1 -1 16.57 1.99
 2 -1 -1 16.07 1.91
 -2 1 1 16.02 1.96
 2 1 -1 12.71 0.98
 -2 -1 1 7.19 0.79
 -2 -1 1 10.38 1.29
 -2 1 1 18.01 2.01
 -2 1 1 17.16 1.95
 2 -1 -1 16.85 1.9
 -2 -1 1 12.43 0.98
 2 -1 0 767.1 12.8
 -2 1 0 811.01 12.65
 -2 -1 0 769.44 12.75
 2 1 0 759.98 12.49
 2 1 0 776.82 12.76
 2 -1 0 795.62 13.25
 -2 1 0 754.68 12.7
 -2 1 0 736.46 12.11
 2 -1 0 817.55 13.32
 2 -1 1 975.49 15.42
 2 1 1 945.37 15.14
 -2 1 -1 899.19 14.77
 -2 -1 -1 915.55 15.16
 2 -1 2 1463.61 21.65
 -2 1 -2 1417.32 20.56
 2 1 2 1418.37 20.94
 -2 -1 -3 1082.6 20.48
 -2 1 -3 1070.22 20.01
 -2 1 -4 186.07 9.58
 -2 -1 -4 170.13 9.11
 -2 -1 -5 468.06 17
 -2 1 -5 454.08 16.41
 -2 1 -6 11.24 2.41
 -2 -1 -6 13.08 3.1
 -2 -1 -7 49.83 6.32
 -2 1 -7 45.97 6.11
 -2 -1 -8 48.29 6.7
 2 1 8 51.42 7.17
 2 -1 8 50.03 6.98
 -2 1 -8 47.98 6.75
 -2 -1 -9 33.43 5.89
 2 1 9 29.88 5.5
 -2 1 -9 31.48 5.85
 2 -1 9 32.94 5.98
 -2 -1 -10 3.93 2.61
 2 1 10 3.41 2.19
 2 -1 10 3.2 2
 -2 1 -10 4.32 2.51
 -2 -1 -11 8.66 3.58
 -2 1 -11 3.32 1.88
 2 -1 11 6.74 3.11
 2 1 11 3.97 1.9
 2 -1 12 7.61 3.69
 -2 1 -12 7.38 3.38
 -2 -1 -12 6.51 3.32
 2 1 12 8.51 3.56
 -2 -1 -13 32.08 7.21
 -2 1 -13 29.06 6.86
 2 -1 13 38.57 7.89
 2 1 13 35.24 7.13
 -2 -1 -14 6.68 3.38
 2 1 14 1.78 1.49
 -2 1 -14 5.41 3.74
 2 -1 14 2.96 2.83
 2 2 -16 0.09 1.18
 2 2 -15 13.07 4.8
 -2 2 15 9.73 4.4
 -2 -2 15 11.5 5.01
 -2 -2 14 -0.27 2.22
 -2 2 14 4.83 3.18
 2 2 -14 2.27 1.7
 -2 2 13 3.25 2.34
 -2 -2 13 2.27 1.61
 -2 2 12 7.8 2.88
 -2 -2 12 8.17 3.11
 -2 -2 11 5.36 2.69
 -2 2 11 7.04 3.03
 -2 2 10 33.83 6.05
 -2 -2 10 31.9 5.91
 -2 2 9 35.58 6.02
 -2 -2 9 27.46 5.29
 -2 2 8 70.05 7.87
 -2 -2 8 66.92 7.48
 -2 -2 7 17.82 3.73
 -2 2 7 20.3 4.01
 -2 2 6 177.01 10.83
 2 -2 -6 168.18 4.47
 -2 -2 6 165.42 10.45
 2 2 -5 1218.48 22.66
 -2 -2 5 1166.12 13.07
 -2 2 5 1203.84 25.78
 -2 -2 5 1227.55 25.71
 -2 -2 4 749.01 18.41
 -2 2 4 748.57 18.34
 2 2 -4 760.83 16.11
 -2 -2 4 738.22 11.38
 -2 2 3 2530.74 30.12
 -2 2 3 2599.66 31.95
 -2 -2 3 2518.98 22.41
 -2 -2 3 2542.88 29.7
 2 2 -3 2571.92 26.14
 2 -2 -3 2570.97 31.75
 2 -2 -2 234.28 8.01
 2 -2 -2 251.51 8.84
 2 -2 -2 227.22 7.91
 2 2 -2 204.65 6.23
 2 2 -2 240.04 8.05
 -2 -2 2 216.75 6.89
 2 2 -2 224.03 7.69
 -2 2 2 209.43 8.07
 2 -2 -2 213.2 8.1
 -2 -2 2 210.77 6.9
 -2 -2 1 91.74 4.88
 2 2 -1 95.29 4.49
 2 -2 -1 91.83 4.45
 -2 2 1 86.97 4.96
 2 -2 -1 91.64 4.98
 -2 2 1 86.83 4.79
 -2 -2 1 98.96 4.7
 -2 -2 1 117.45 5.42
 -2 2 1 84.71 4.29
 2 2 -1 90.04 4.8
 2 -2 -1 95.47 5.26
 -2 2 0 1571.62 20.12
 2 2 0 1694.53 19.11
 -2 2 0 1675.43 19.26
 2 2 0 1637.28 18.48
 -2 -2 0 1742.03 19.32
 2 -2 0 1678.62 18.96
 -2 -2 0 1726.39 20.87
 2 -2 0 1641.96 19.66
 2 -2 0 1737.03 21.98
 -2 2 0 1658.27 18.45
 2 2 0 1776.17 21.33
 2 -2 0 1841.3 20.17
 2 2 1 169.26 6.3
 2 -2 1 175.58 6.63
 -2 2 -1 157.83 6.15
 2 2 1 162.26 6.87
 -2 -2 -1 165.52 6.46
 2 2 2 595.8 13.43
 -2 -2 -2 523.41 13.09
 -2 2 -2 531.9 12.64
 2 2 2 592.03 13.31
 2 -2 2 607.85 13.93
 -2 -2 -3 12.6 2.12
 2 2 3 15.24 2.21
 -2 2 -3 14.55 2.21
 -2 -2 -4 843.8 20.54
 -2 2 -4 857.6 20.22
 -2 -2 -5 385.35 15.23
 -2 2 -5 381.96 14.93
 -2 -2 -6 1.7 0.77
 -2 2 -6 -0.46 1.28
 -2 2 -7 2.46 1.59
 -2 -2 -7 1.12 1.58
 -2 -2 -8 11.04 3.34
 2 -2 8 11.33 3.31
 2 2 8 12.26 3.02
 -2 2 -8 12.98 3.36
 2 2 9 -0.14 1.3
 -2 2 -9 0.08 0.86
 2 -2 9 1.76 1.51
 2 -2 10 1.46 0.9
 -2 -2 -10 -1.95 2.02
 2 2 10 -0.03 1.38
 -2 2 -10 2.1 2.49
 -2 -2 -11 5.34 2.84
 2 -2 11 6.49 2.82
 -2 2 -11 5.55 2.62
 2 2 11 3.65 1.83
 -2 -2 -12 45.13 8.18
 2 2 12 52.21 8.48
 -2 2 -12 42.81 7.99
 2 -2 12 44.07 7.96
 -2 -2 -13 5.22 3.1
 -2 2 -13 12.83 4.61
 2 -2 13 8.8 4.04
 2 2 13 10.65 4.11
 -2 2 -14 0.83 1.48
 -2 -2 -14 3.55 2.95
 2 2 14 -0.36 2.48
 2 3 -15 -1.24 1.63
 -2 -3 15 0.5 1.88
 -2 3 15 0 1.37
 -2 3 14 1.8 1.72
 -2 -3 14 4.6 3.17
 2 3 -14 1.76 1.58
 -2 -3 13 -1.37 1.86
 2 3 -13 0.35 1.14
 -2 3 13 0.39 1.47
 -2 -3 12 2.21 1.41
 -2 3 12 3.69 2.05
 -2 -3 11 21.09 5.2
 -2 3 11 25.95 5.8
 -2 -3 10 116.49 11.68
 -2 3 10 128.79 12.13
 -2 3 9 11.71 3.6
 -2 -3 9 6.55 2.71
 -2 -3 8 53.25 6.92
 -2 3 8 60.2 7.1
 2 -3 -7 0.1 0.22
 -2 3 7 0.53 0.82
 -2 -3 7 -0.02 1.12
 -2 -3 7 0.94 0.34
 2 3 -6 253.32 11.04
 -2 -3 6 247.39 7.19
 -2 -3 6 251.09 12.69
 -2 3 6 255.25 12.9
 -2 -3 5 402.56 14.82
 -2 3 5 440.11 15.48
 -2 -3 5 414.38 9.79
 2 3 -5 437.51 12.91
 -2 3 4 57.86 5.01
 2 3 -4 57.52 4.17
 -2 -3 4 51.24 4.73
 -2 3 4 53.44 5.2
 -2 3 3 45.84 4.67
 2 3 -3 47.66 3.25
 -2 -3 3 42.42 3.37
 2 -3 -3 45.18 4.58
 2 3 -2 14.91 1.98
 -2 -3 2 11.36 1.87
 2 -3 -2 15.54 2.08
 -2 3 2 11.16 1.98
 -2 -3 2 11.17 1.47
 2 3 -2 14.87 2.08
 2 -3 -2 13.13 2.39
 2 -3 -2 15.19 1.99
 2 -3 -1 762.06 13.23
 2 -3 -1 767.97 14.8
 -2 -3 1 747.49 15.1
 -2 3 1 783.37 12.77
 2 3 -1 796.51 12.76
 -2 3 1 786.41 16.28
 -2 3 1 844.89 15.35
 2 -3 -1 882.53 17.79
 -2 -3 1 788.22 13.48
 2 3 0 264.31 7.26
 -2 3 0 266.07 7.43
 -2 -3 0 301.41 8.09
 -2 3 0 265.29 7.96
 2 -3 0 269.11 7.59
 2 -3 0 304.09 10.04
 2 -3 0 256.18 8.02
 -2 -3 0 251.46 8.83
 2 -3 0 299.47 8.24
 -2 3 0 258.75 8.9
 -2 -3 0 260.67 5.06
 2 3 0 286.39 7.73
 2 3 1 1956.76 22
 -2 3 -1 1918.69 20.89
 -2 -3 -1 1902.56 22.26
 -2 3 -1 1821.99 20.71
 -2 3 -1 1862.22 24.99
 -2 -3 -1 1879.65 25.91
 2 -3 2 211.5 8.36
 2 3 2 194.93 7.74
 -2 -3 -2 186.31 8.21
 -2 3 -2 185.17 7.4
 -2 -3 -2 192.21 7.85
 -2 3 -3 30.86 3.36
 -2 -3 -3 34.43 3.78
 -2 3 -4 579.22 16.36
 -2 -3 -4 602.48 17.28
 -2 3 -5 17.19 3.23
 -2 -3 -5 18.58 3.45
 -2 3 -6 10.99 2.92
 -2 -3 -6 9.15 2.52
 -2 3 -7 41.62 5.72
 -2 -3 -7 42 6.1
 2 3 8 24.83 4.73
 -2 3 -8 24 4.54
 -2 -3 -8 23.85 4.7
 2 -3 8 24.96 4.92
 -2 -3 -9 2.01 1.08
 2 -3 9 2.76 2.27
 2 3 9 2.79 1.89
 -2 3 -9 3.02 1.75
 2 -3 10 0.04 1.27
 -2 -3 -10 2.35 2.13
 -2 3 -10 -0.25 2.08
 2 3 10 -2.44 1.98
 2 3 11 23.57 5.38
 -2 3 -11 22.01 5.64
 -2 -3 -11 22.72 5.44
 2 -3 11 28.42 6.18
 2 -3 12 2.78 2.15
 -2 -3 -12 1.91 0.82
 -2 3 -12 1.25 1.99
 2 3 12 -1.54 1.99
 -2 3 -13 2.91 2.57
 2 -3 13 -0.99 1.7
 2 3 13 -2.71 2.64
 -2 -3 -13 2.41 2.5
 2 -3 14 -3.16 2.56
 2 3 14 -0.11 0.9
 -2 3 -14 2.05 2.06
 -2 -3 -14 -2.47 2.27
 -2 4 14 2.42 2.52
 -2 -4 14 3.21 2.9
 -2 4 13 -1.15 1.86
 -2 -4 13 1.24 2.1
 2 4 -13 1.76 1.59
 -2 -4 12 4.59 3.13
 2 4 -12 5.56 2.69
 -2 4 12 9.84 4.06
 2 4 -11 15.42 3.91
 -2 -4 11 9.19 3.31
 -2 4 11 14.36 4.28
 -2 4 10 1.06 0.82
 -2 -4 10 1.72 1.77
 -2 -4 9 111.72 10.91
 -2 4 9 108.73 10.41
 2 4 -8 111.25 8.65
 -2 -4 8 99.85 9.68
 2 -4 -8 108.85 5.76
 -2 -4 8 109.96 5.2
 -2 4 8 106.12 9.62
 2 4 -7 3.51 1.27
 -2 4 7 4.68 2.08
 -2 -4 7 1.37 1.33
 2 4 -6 91.58 6.24
 -2 4 6 84 7.39
 -2 -4 6 77.79 7.22
 -2 4 5 227.53 11.18
 2 4 -5 221.37 8.88
 -2 -4 5 215.39 10.73
 2 4 -4 103.21 5.14
 -2 4 4 105.34 6.96
 -2 4 4 102.59 7.83
 -2 -4 4 96.06 6.47
 -2 4 3 154.5 8.87
 2 -4 -3 146.08 8.15
 2 4 -3 161.42 7.46
 2 4 -3 153.1 5.41
 -2 -4 2 156.72 5.24
 2 -4 -2 170.74 6.83
 2 4 -2 169.57 6.81
 -2 4 2 146.75 7.95
 2 4 -2 179.02 7.12
 2 4 -2 168.25 4.39
 2 -4 -2 155.55 7.75
 -2 4 1 21.71 2.55
 2 4 -1 18.73 2
 -2 -4 1 19.95 2.14
 2 -4 -1 20.4 2.6
 -2 4 1 19.8 2
 -2 4 1 18.63 2.67
 2 4 -1 21.25 1.27
 -2 -4 0 1.7 1.27
 2 4 0 -0.46 0.48
 2 -4 0 -1.17 0.72
 -2 -4 0 0.75 0.43
 -2 4 0 -0.29 0.3
 2 -4 0 0.87 0.36
 -2 -4 0 0.23 0.26
 -2 4 -1 415.13 9.65
 2 -4 1 333.54 9.2
 -2 -4 -1 407.36 13.18
 -2 4 -1 409.29 12.46
 -2 4 -1 412.8 9.53
 2 4 1 434.67 9.92
 -2 -4 -1 449.04 10.77
 -2 -4 -1 344.23 9.07
 -2 4 -1 422.24 9.79
 -2 4 -2 137.04 6.14
 2 4 2 153.74 6.83
 2 -4 2 82.9 5.35
 -2 -4 -2 151.23 7.03
 -2 -4 -2 145.67 7.85
 -2 -4 -2 77.37 4.96
 -2 -4 -3 252.07 10.14
 -2 -4 -3 235.73 10.67
 -2 4 -3 230.21 9.08
 -2 -4 -4 140.72 8.46
 -2 4 -4 142.75 8.08
 -2 -4 -4 132.98 8.17
 -2 -4 -5 81.25 6.97
 -2 4 -5 75.43 6.41
 -2 -4 -6 323.93 15.26
 -2 4 -6 316.96 14.59
 2 -4 7 52.18 6.78
 -2 4 -7 58.21 6.8
 -2 -4 -7 49.7 6.49
 2 -4 8 1.64 1.31
 2 4 8 1.08 1.42
 -2 4 -8 0.31 1.16
 -2 -4 -8 0.34 0.97
 2 -4 9 46.35 7.24
 2 4 9 45.31 6.54
 -2 4 -9 44.25 6.8
 -2 -4 -9 44.71 7.02
 2 4 10 65.89 8.66
 2 -4 10 63.39 8.77
 -2 -4 -10 57.42 8.46
 -2 4 -10 57.38 8.19
 -2 4 -11 2.79 2.02
 2 4 11 5.57 3.02
 2 -4 11 4.31 2.22
 -2 -4 -11 3.66 2.26
 -2 4 -12 -0.95 1.79
 -2 -4 -12 -2.29 2.29
 2 4 12 -1.15 1.42
 2 -4 12 -2.48 2.08
 -2 -4 -13 1.46 1.79
 2 -4 13 -2.52 1.69
 -2 4 -13 2.39 2.39
 2 4 13 -2.08 2.16
 -2 4 -14 3.96 3.14
 -2 -4 -14 4.54 3.68
 2 4 14 5.46 3.15
 2 -4 14 1 1.5
 -2 -5 14 2.76 2.13
 -2 5 14 -0.26 1.01
 -2 5 13 4.63 2.66
 -2 -5 13 -0.45 1.44
 -2 -5 12 2.57 2.32
 2 5 -12 0.56 1.03
 -2 5 12 -1.69 2.01
 -2 5 11 29.52 6.23
 -2 -5 11 28.51 5.9
 2 5 -11 35.36 5.85
 -2 -5 10 1.59 1.88
 -2 5 10 0.06 1.05
 2 5 -10 1.13 1.76
 -2 5 9 5.69 2.12
 -2 -5 9 9.16 3.37
 2 5 -9 7.39 2.15
 2 5 -8 31.57 4.31
 -2 5 8 27.66 4.97
 2 -5 -8 25.1 3.21
 -2 -5 8 31.16 5.6
 -2 5 7 311.57 15.53
 -2 -5 7 314.43 16.24
 2 5 -7 330.69 12.83
 -2 5 6 0.11 0.97
 -2 -5 6 0.67 0.8
 2 5 -6 0.63 0.61
 -2 -5 5 294.32 12.62
 -2 5 5 315.75 13.12
 -2 5 5 282.92 14.3
 2 5 -5 299.79 9.55
 -2 5 4 7.87 1.79
 -2 -5 4 7.29 1.81
 2 5 -4 7.73 1.3
 -2 5 4 6.16 1.38
 2 5 -3 180.61 7.9
 2 -5 -3 174 9.29
 2 -5 -3 167.46 7.74
 -2 5 3 177.43 10.03
 2 5 -2 244.97 6.02
 2 5 -2 264.1 8.29
 2 -5 -2 244.38 10.07
 -2 5 2 236.11 10.59
 -2 -5 2 214.17 5.66
 2 -5 -2 234.59 8.07
 -2 -5 1 6.38 1.06
 -2 5 1 9.09 1.42
 2 5 -1 7.29 0.96
 2 -5 -1 5.67 1.36
 2 -5 -1 7.87 1.32
 -2 5 1 10.41 2.35
 2 5 -1 6.82 1.11
 -2 5 0 124.98 4.72
 -2 -5 0 137.18 5.14
 -2 -5 0 74.31 3.93
 -2 5 0 121.95 5.83
 2 -5 0 129.46 6.25
 2 5 0 139.44 4.94
 -2 5 0 130.59 7.44
 2 -5 0 74.05 4.14
 2 5 0 137 5.39
 -2 -5 -1 135.96 8.08
 2 -5 1 74.44 4.33
 2 5 1 140.61 5.51
 -2 5 -1 135.52 5.37
 -2 -5 -1 70.36 4.38
 -2 -5 -1 138.36 5.94
 -2 5 -1 140.48 7.99
 -2 5 -1 83.66 4.24
 -2 -5 -1 144.17 6
 -2 5 -1 90.38 4.66
 -2 -5 -2 4.72 1.62
 -2 5 -2 2.06 0.68
 -2 5 -2 3.6 1.83
 -2 -5 -2 6.76 2.26
 -2 -5 -2 2.59 1.02
 -2 5 -2 4.21 1.14
 -2 -5 -3 162.96 8
 -2 5 -3 143.73 7.09
 -2 -5 -3 138.77 8.59
 -2 5 -4 220.47 9.91
 -2 -5 -4 231.47 10.91
 -2 -5 -4 216.28 11.03
 -2 -5 -5 -1.35 1.36
 -2 5 -5 -0.83 0.93
 -2 -5 -5 -0.04 1.12
 -2 5 -6 17.82 3.55
 -2 -5 -6 18.35 3.83
 -2 -5 -7 55.18 7.04
 2 5 7 61.39 6.98
 2 -5 7 58.13 7.45
 -2 5 -7 61.9 7.03
 2 -5 8 11.06 3.61
 -2 -5 -8 10.22 3.32
 -2 5 -8 9.77 2.95
 2 5 8 10.4 3.18
 -2 -5 -9 9.63 2.9
 2 -5 9 8.67 2.82
 -2 5 -9 11.09 3.65
 2 5 9 10.58 3.44
 2 -5 10 10.12 3.36
 -2 5 -10 5.16 2.39
 -2 -5 -10 12.09 4.1
 2 5 10 6.49 2.88
 -2 5 -11 6.97 3.08
 2 -5 11 13.14 3.67
 -2 -5 -11 13.03 4.31
 2 5 11 10.56 3.75
 2 5 12 1.68 1.27
 2 -5 12 0.33 1.55
 -2 -5 -12 3.79 2.47
 -2 5 -12 1.64 1.69
 -2 5 -13 1.53 1.7
 -2 -5 -13 0.01 1.07
 2 5 13 1.29 1.88
 2 -5 13 -0.31 0.83
 -2 5 -14 -3.7 2.62
 2 -5 14 0.73 1.32
 2 5 14 -1.65 2.04
 -2 -5 -14 1.82 2.4
 -2 -6 14 0.72 1.13
 -2 6 14 0.62 1.93
 -2 -6 13 1.04 1.18
 -2 6 13 5.09 3.02
 -2 6 12 9.66 3.46
 -2 -6 12 1.88 1.47
 -2 6 11 0.35 1.3
 -2 -6 11 5.85 2.97
 -2 6 10 4.48 2.47
 2 6 -10 5.22 2.14
 -2 -6 10 0.79 1.2
 2 6 -9 3.33 1.66
 -2 -6 9 1.64 1.79
 -2 6 9 2.82 1.94
 2 6 -8 253.65 11.72
 -2 -6 8 226.05 14.5
 -2 6 8 222.18 13.96
 2 -6 -8 220.95 10.7
 2 6 -7 392.69 13.36
 -2 -6 7 341.08 16.03
 -2 6 7 357.34 16.64
 -2 6 6 0.4 0.82
 -2 -6 6 -0.61 1.36
 2 6 -6 0.27 0.29
 -2 6 5 10.3 2.29
 -2 -6 5 12.16 2.52
 2 6 -5 12.02 1.69
 -2 6 5 14.17 3.43
 -2 6 4 84.27 7.64
 2 -6 -3 413.9 14.91
 2 6 -3 405.27 11.54
 2 -6 -3 388.45 11.86
 2 6 -3 382.79 11.84
 -2 6 3 408.05 16.09
 2 6 -3 406.41 9.84
 2 -6 -2 141.18 6.41
 2 6 -2 234.31 7.67
 -2 -6 2 215.42 5.19
 2 6 -2 149.05 6.51
 2 -6 -2 240.05 8.18
 2 -6 -2 264.39 11.06
 -2 6 2 240.34 11.35
 2 6 -2 252.74 7.13
 2 -6 -1 0.28 0.25
 2 6 -1 1.37 0.54
 2 -6 -1 -0.6 0.89
 2 -6 -1 -0.05 0.5
 -2 6 1 1.43 0.85
 2 6 -1 0.93 0.41
 2 6 -1 1.35 0.59
 2 6 -1 1.65 0.78
 -2 6 0 235.92 10.75
 -2 6 0 240.67 6.67
 -2 -6 0 228.43 6.86
 2 6 0 226.79 6.77
 2 -6 0 239.53 8.86
 2 6 0 248.37 7.66
 -2 -6 -1 9.39 1.88
 2 -6 1 5.84 1.18
 -2 6 -1 6.66 1.3
 -2 6 -1 4.57 0.95
 2 6 1 10.27 1.57
 -2 -6 -1 10.53 1.49
 -2 6 -1 10.45 2.15
 -2 -6 -2 121.89 8.26
 -2 6 -2 124.42 7.88
 -2 -6 -2 124.75 6.76
 -2 6 -2 119.57 5.84
 -2 -6 -3 19.8 3.58
 -2 6 -3 20.03 3.41
 -2 -6 -3 25.98 3.36
 -2 6 -3 22.73 2.81
 -2 -6 -4 6.25 2.03
 -2 -6 -4 8.79 1.91
 -2 6 -4 13.36 2.44
 -2 6 -5 463.44 16.11
 -2 -6 -5 481.88 18.15
 -2 -6 -5 491.44 17.67
 2 6 6 102.78 8.26
 -2 -6 -6 98.55 8.02
 -2 6 -6 95.85 8
 2 -6 6 99.17 8.47
 -2 -6 -6 102.03 8.89
 -2 6 -7 77.48 7.77
 -2 -6 -7 75 8.32
 2 -6 7 81.76 7.99
 2 6 7 81.52 7.87
 -2 6 -8 14.67 3.82
 2 -6 8 12.58 3.72
 2 6 8 16.45 3.81
 -2 -6 -8 13.95 3.87
 2 6 9 20.9 4.43
 -2 -6 -9 24.66 5.44
 2 -6 9 23.61 4.94
 -2 6 -9 21.29 4.77
 2 6 10 23.32 5.04
 -2 6 -10 21.93 5.18
 -2 -6 -10 21.19 5.04
 2 -6 10 23.65 5.31
 -2 -6 -11 2.76 2.38
 2 -6 11 0.81 0.94
 -2 6 -11 1.54 1.55
 2 6 11 -1.41 2.15
 -2 6 -12 3.56 2.08
 2 -6 12 5.04 2.95
 -2 -6 -12 10.39 3.77
 -2 6 -13 -3.3 2.34
 2 6 13 0.81 1.7
 -2 -6 -13 0.87 1.38
 2 -6 13 0.57 1.28
 -2 -6 -14 0.52 1.52
 -2 6 -14 0.3 1.45
 2 6 14 1.72 1.67
 2 -6 14 4.18 3.46
 -2 7 14 0.6 0.61
 -2 -7 14 -3.02 2.45
 -2 -7 13 1.99 2.34
 -2 7 13 -2.04 2.08
 -2 7 12 8.09 3.38
 -2 -7 12 1.97 2.3
 -2 -7 11 1.43 1.57
 -2 7 11 3.51 2.38
 -2 7 10 33.14 6.08
 -2 -7 10 26.69 5.52
 -2 -7 9 -0.33 1.39
 -2 7 9 -0.04 1.16
 -2 -7 8 6.26 2.41
 -2 7 8 9.24 2.87
 2 7 -8 10.58 2.27
 2 7 -7 1.07 0.39
 -2 -7 7 1.98 1.28
 -2 7 7 1.54 1.11
 -2 7 6 39.42 5
 -2 -7 6 34.86 4.79
 2 7 -6 40.88 3.15
 -2 7 5 43.95 5.77
 2 -7 -4 74.37 6.95
 -2 7 4 81.71 7.95
 2 7 -4 80.6 5.32
 2 7 -3 54.22 4.21
 2 -7 -3 50.23 4.13
 2 7 -3 63.15 4.11
 2 -7 -3 59.02 4.69
 2 7 -3 65.54 4.68
 2 -7 -3 66.93 6.2
 -2 7 3 63.44 6.48
 2 -7 -2 2.87 0.78
 2 -7 -2 3.74 1.03
 -2 7 2 9.6 2.5
 2 -7 -2 8.26 1.97
 2 7 -2 8.46 1.41
 -2 -7 2 6.2 0.74
 2 7 -2 3.71 1
 -2 7 1 31.03 4.09
 2 -7 -1 33.09 3.77
 2 -7 -1 40.62 2.94
 2 7 -1 12.57 1.61
 2 -7 -1 16.27 1.93
 2 7 -1 30.29 2.43
 2 7 -1 31.18 2.77
 2 -7 -1 25.88 2.23
 2 7 0 17.14 1.69
 -2 7 0 20.14 1.72
 2 -7 0 9.43 1.31
 -2 7 0 21.33 3.51
 2 -7 0 20.61 2.72
 -2 -7 0 18.41 1.84
 2 7 0 21.09 2.46
 -2 -7 0 15.38 2.39
 -2 7 -1 0.4 0.29
 2 7 1 0.96 0.66
 -2 -7 -1 0.42 0.25
 -2 7 -2 377.33 14.62
 -2 7 -2 379.84 9.91
 -2 -7 -2 393.13 11.61
 -2 -7 -3 29.04 3.4
 -2 7 -3 24.99 3.74
 -2 7 -3 28.87 3.11
 -2 -7 -3 27.98 4.41
 -2 7 -4 42.43 4.09
 -2 -7 -4 44.5 4.86
 -2 -7 -4 39.03 5.21
 -2 7 -4 38.11 5.06
 -2 7 -5 112.97 7.59
 -2 -7 -5 112.36 8.57
 2 -7 5 119.42 8.61
 -2 -7 -5 106.27 9.09
 -2 7 -6 171.7 10.42
 -2 -7 -6 165.6 11.05
 2 -7 6 189.11 11.95
 -2 -7 -6 172.73 11.34
 2 7 6 183.99 10.89
 -2 -7 -7 32.78 5.19
 2 7 7 34 5.02
 -2 7 -7 32.11 4.83
 -2 -7 -7 29.88 4.94
 2 -7 7 31.98 5.24
 -2 -7 -8 58.75 7.61
 -2 7 -8 59.23 7.21
 2 7 8 61.27 7.23
 2 -7 8 53.55 7.09
 2 -7 9 4.16 2.74
 2 7 9 5.62 2.55
 -2 7 -9 3.78 2.08
 -2 -7 -9 4.75 2.31
 -2 7 -10 1.23 1.54
 2 7 10 2.46 1.5
 2 -7 10 1.33 1.9
 -2 -7 -10 -0.33 1.73
 -2 -7 -11 0.49 1.27
 -2 7 -11 2.02 2.38
 2 7 11 -2.92 2.45
 2 -7 11 -1.62 2.39
 2 -7 12 6.56 3.59
 -2 -7 -12 3.92 2.46
 2 7 12 7.55 3.13
 -2 7 -12 -0.54 0.52
 2 -7 13 2.48 1.74
 -2 -7 -13 -1.14 1.54
 -2 7 -13 0.83 1.5
 2 7 13 4.37 2.9
 -2 -7 -14 1.91 1.96
 -2 7 -14 -1.89 1.94
 2 7 14 0.23 0.7
 2 -7 14 0.5 1.82
 -2 -8 14 -3.54 2.63
 -2 8 14 4.08 2.96
 -2 8 13 2.23 1.91
 -2 -8 13 4.04 3.14
 -2 -8 12 4.7 2.54
 -2 8 12 2.99 2.07
 -2 8 11 7.22 2.74
 -2 -8 11 6.38 3.22
 -2 8 10 -2.06 1.99
 -2 -8 10 -0.23 1.81
 -2 8 9 1 1.77
 -2 -8 9 0.93 1.05
 -2 8 8 18.22 3.77
 -2 -8 8 17.15 3.82
 -2 8 7 73.99 7.47
 -2 -8 7 68.23 7.05
 -2 8 5 19.31 4.31
 2 8 -5 15.7 2.68
 2 -8 -4 5.01 2.08
 2 8 -4 3.81 1.21
 -2 8 4 1.88 1.01
 -2 8 3 68.11 7.16
 2 -8 -3 69.25 6.59
 2 -8 -3 41.52 3.82
 2 8 -3 49.12 3.86
 2 8 -3 42.64 3.71
 2 8 -3 70.49 4.78
 2 -8 -3 38.68 3.75
 2 8 -2 2.07 0.86
 -2 8 2 1.47 0.67
 2 8 -2 0.59 0.14
 2 -8 -2 2.4 0.8
 2 -8 -2 0.95 0.48
 2 8 -2 2.75 0.77
 2 -8 -2 0.03 1.06
 2 -8 -1 134.2 5.27
 2 -8 -1 243.25 10.47
 2 8 -1 138.72 5.06
 -2 8 1 226.22 11.9
 2 8 -1 227.73 8.27
 2 8 -1 208.07 5.95
 2 -8 0 -0.11 0.3
 -2 8 0 0.08 0.96
 2 -8 0 0.56 0.63
 2 8 0 0.63 0.3
 2 -8 0 0.74 0.38
 2 8 0 0.93 0.69
 -2 -8 -1 21.27 1.97
 -2 8 -1 21.73 1.72
 -2 8 -1 21.75 3.6
 2 8 1 20.86 2.91
 -2 8 -2 17.59 2.05
 -2 8 -2 16.87 3.29
 -2 -8 -2 20.02 2.55
 -2 -8 -2 7.93 1.56
 -2 8 -2 7.67 1.33
 -2 8 -3 3.54 0.9
 -2 8 -3 5.35 1.87
 -2 -8 -3 5.13 2.08
 -2 8 -3 5.45 1.35
 -2 -8 -3 4.35 1.52
 -2 8 -4 73.31 5.44
 2 8 4 78.59 5.91
 2 -8 4 75.62 6.07
 -2 -8 -4 67.81 7.58
 -2 8 -4 70.58 7.04
 -2 -8 -4 73.85 6.29
 -2 8 -5 33.8 4.1
 -2 8 -5 30.45 5.09
 2 8 5 36.33 4.37
 -2 -8 -5 31.4 5.07
 2 -8 5 32.82 4.32
 -2 -8 -5 33.94 4.6
 -2 -8 -6 9.97 3.23
 2 8 6 8.77 2.39
 -2 -8 -6 7.86 2.29
 2 -8 6 9.8 2.68
 -2 8 -6 8.81 2.3
 2 -8 7 -0.76 1.66
 -2 -8 -7 2.07 1.84
 -2 -8 -7 1.74 0.88
 -2 8 -7 -0.88 1.51
 2 8 7 -0.3 1.17
 -2 8 -8 11.84 3.25
 -2 -8 -8 14.41 3.86
 2 8 8 12.96 2.79
 2 -8 8 10.01 3.04
 -2 -8 -9 9.6 3.01
 2 8 9 12.32 3.43
 2 -8 9 9.15 3.16
 -2 8 -9 12.95 3.46
 2 -8 10 -0.25 0.63
 -2 8 -10 0.84 0.59
 2 8 10 1.45 0.82
 -2 -8 -10 2.64 1.71
 -2 8 -11 6.85 2.96
 -2 -8 -11 6.28 3.03
 2 8 11 4.74 2.42
 2 -8 11 1.08 0.66
 -2 -8 -12 1.25 1.58
 2 8 12 0.54 0.9
 -2 8 -12 0.14 0.96
 2 -8 12 1.31 2.02
 -2 -8 -13 9.92 4.93
 2 8 13 27.1 6.42
 -2 8 -13 13.34 5.17
 2 -8 13 18.13 6.06
 -2 8 -14 1.32 2.74
 -2 -8 -14 2.92 2.4
 2 8 14 -0.96 1.34
 2 -8 14 1.57 1.91
 -2 -9 14 -0.84 1.78
 -2 9 14 0.91 1.56
 -2 9 13 -1.92 1.63
 -2 -9 13 4.42 3.35
 -2 9 12 1.64 1.24
 -2 -9 12 2.62 2.29
 -2 -9 11 5.15 2.72
 -2 9 11 0.78 0.46
 -2 9 10 -0.48 1.39
 -2 -9 10 -0.93 1.47
 -2 -9 9 0.23 0.98
 -2 9 9 1.24 1.75
 -2 -9 8 11.25 2.99
 -2 9 8 14.05 3.52
 2 9 -6 8.39 2.17
 2 -9 -5 24.47 4.08
 -2 9 5 25.77 4.94
 2 9 -5 28.35 3.68
 2 -9 -4 27.08 4.4
 -2 9 4 31.92 5.37
 2 9 -4 31.14 3.54
 2 9 -3 1 0.65
 2 -9 -3 1.14 0.71
 2 -9 -3 0.78 0.59
 2 9 -2 156.84 7.52
 2 9 -2 99.01 4.4
 2 -9 -2 179.73 6.45
 2 9 -2 169.07 5.5
 2 -9 -2 176.86 10.37
 -2 9 2 152.05 10.25
 2 -9 -2 85.92 4.58
 2 -9 -1 13.34 1.44
 -2 9 1 17.64 3.5
 2 9 -1 13.06 1.2
 2 -9 -1 19.68 3.16
 2 9 -1 19.19 2.62
 2 9 -1 17.33 1.33
 2 -9 0 90.52 6.04
 -2 9 0 89.22 7.82
 2 9 0 94.06 6.29
 -2 9 -1 197.57 4.5
 -2 9 -1 197.73 11.44
 2 9 1 210.69 9.9
 2 -9 2 81.22 4.33
 -2 9 -2 43.8 2.89
 -2 -9 -2 42.82 3.46
 -2 9 -2 71.84 7.06
 2 9 3 39.91 3.53
 -2 -9 -3 32.18 5.37
 -2 9 -3 35.06 5.01
 2 -9 3 35.88 3.68
 -2 -9 -3 39.22 3.99
 -2 9 -3 36.24 3.29
 -2 9 -4 6.69 1.58
 -2 -9 -4 6.79 1.8
 2 -9 4 7.98 1.98
 -2 -9 -4 5.12 2.04
 -2 9 -4 7.04 2.37
 2 9 4 7.8 1.81
 -2 9 -5 124.18 8.07
 -2 -9 -5 149.08 10.3
 2 -9 5 126.37 8.9
 -2 9 -5 118.24 9.97
 2 9 5 128.99 8.32
 -2 -9 -5 117.35 10.49
 -2 -9 -6 12.55 3.36
 -2 9 -6 14.37 3.12
 -2 9 -6 11.34 3.07
 2 -9 6 16.38 3.53
 -2 -9 -6 12.72 3.34
 2 9 6 13.26 2.87
 2 -9 7 2.78 1.34
 -2 -9 -7 3.97 2.31
 -2 -9 -7 1.33 1.25
 -2 9 -7 4.19 2.23
 2 9 7 2.59 1.44
 -2 -9 -8 1.98 1.4
 2 -9 8 1.33 0.71
 -2 9 -8 1.39 0.92
 2 9 8 3.32 1.41
 -2 -9 -8 2.78 1.96
 -2 -9 -9 -1.35 1.53
 2 -9 9 1.82 2.14
 -2 9 -9 -0.54 1
 2 9 9 -0.43 0.74
 -2 9 -10 3.21 2.13
 2 -9 10 -0.72 1.71
 2 9 10 -0.98 1.25
 -2 -9 -10 0.55 1.33
 -2 9 -11 -1.37 1.68
 -2 -9 -11 0.77 1.42
 2 -9 11 -1.16 1.6
 2 9 11 -1.59 1.38
 -2 9 -12 -0.69 0.93
 -2 -9 -12 -0.1 1.28
 2 9 12 0.9 1.59
 2 -9 13 3.59 2.83
 2 9 13 0.58 0.9
 -2 -9 -13 3.57 3.28
 -2 9 -13 2.41 2.49
 2 -9 14 -4.76 3.16
 -2 9 -14 -4.57 2.84
 -2 -9 -14 -0.32 0.93
 2 9 14 -0.49 1.15
 2 -10 -12 4.42 3.28
 -2 10 12 2.37 1.7
 -2 10 11 -2.71 2.12
 2 -10 -7 -1.92 1.73
 2 10 -7 -0.84 1.37
 2 10 -6 3.4 1.17
 2 -10 -6 1.8 1.59
 2 10 -5 2.67 1.1
 2 -10 -5 3.58 2.08
 -2 10 5 3.5 2.37
 2 -10 -4 -1.18 1.04
 2 10 -4 1.35 0.55
 -2 10 4 2.42 1.6
 -2 10 3 16.74 3.84
 2 10 -3 16.23 1.93
 2 -10 -3 15.3 3.28
 2 10 -3 16.15 2.65
 2 -10 -3 19.71 2.46
 -2 10 2 56.3 6.56
 2 -10 -2 59.52 6.02
 2 10 -2 54.26 4.67
 -2 10 1 19.19 3.6
 2 -10 -1 25.39 3.61
 2 10 -1 26.3 3.39
 2 -10 0 115.29 7.29
 2 10 0 100.11 6.98
 -2 10 0 93.35 8.44
 2 10 1 133.65 8.35
 -2 10 -1 119 9.43
 -2 10 -2 2.89 1.21
 -2 10 -2 4.47 0.71
 2 10 2 5.32 0.91
 2 -10 2 4.02 0.77
 -2 10 -3 23.24 4.17
 -2 -10 -3 29.75 3.43
 2 -10 3 28.51 2.92
 2 10 3 27.72 2.77
 -2 10 -3 25.9 2.59
 -2 -10 -4 11.47 2.6
 -2 -10 -4 10.11 3.12
 -2 10 -4 13.89 3.58
 2 10 4 13.99 2.39
 -2 10 -4 12.32 2.17
 2 -10 4 10.83 2.28
 -2 10 -5 -0.98 1.76
 -2 -10 -5 0.69 0.69
 2 10 5 0.59 0.97
 -2 -10 -5 -0.67 0.92
 2 -10 5 0.2 0.69
 -2 10 -5 0 0.49
 -2 10 -6 36.58 5.81
 2 -10 6 35.58 5.03
 -2 -10 -6 33.07 5.46
 -2 -10 -6 41.91 5.74
 2 10 6 36.6 4.73
 -2 10 -6 32.28 4.45
 -2 -10 -7 64.66 7.51
 -2 10 -7 50.11 7.1
 2 -10 7 53.32 6.96
 2 10 7 59.32 6.59
 -2 10 -7 56.41 6.3
 -2 -10 -7 57.7 7.64
 -2 10 -8 0.67 0.77
 2 -10 8 1.42 1.15
 -2 10 -8 1.74 1.47
 2 10 8 4.56 2.21
 -2 -10 -8 0.61 0.83
 -2 -10 -8 0.64 1.14
 -2 -10 -9 12.89 3.75
 -2 10 -9 9.3 2.79
 2 -10 9 12.64 3.75
 2 10 9 14.78 3.62
 -2 -10 -10 0.94 1.06
 -2 10 -10 0.53 0.62
 2 -10 10 4.21 2.84
 2 10 10 2.17 1.71
 -2 -10 -11 -4.53 2.88
 2 10 11 -1.73 1.36
 2 -10 11 0.56 1.74
 2 10 12 4.25 2.72
 2 -11 -12 -1.34 1.63
 2 -11 -11 3.45 2.86
 2 -11 -10 0.18 1.46
 2 -11 -9 1.2 1.44
 2 -11 -8 15.5 4.25
 2 -11 -7 -0.8 1.82
 2 -11 -6 4.23 2.73
 2 11 -5 14 2.72
 2 -11 -5 10.23 3.55
 -2 11 5 15.34 4.23
 2 -11 -4 28.23 5.18
 2 11 -4 35.47 4.13
 -2 11 4 34.44 5.82
 2 -11 -3 26.73 4.68
 -2 11 3 24.97 5.09
 2 11 -3 24.72 3.39
 -2 11 2 7.13 2.58
 2 11 -2 7.58 1.78
 2 -11 -2 9.09 2.72
 -2 11 1 0.71 0.81
 2 -11 -1 0.66 1
 2 11 -1 0.42 0.31
 2 11 0 25.71 3.76
 -2 11 0 25.12 4.69
 2 -11 0 31.6 3.86
 -2 11 -1 54.13 6.62
 2 11 1 57.23 5.73
 -2 11 -2 9.95 2.96
 -2 11 -3 6.79 2.44
 -2 11 -4 16.82 3.79
 -2 -11 -4 20.49 5.09
 -2 -11 -5 -0.01 1.46
 -2 11 -5 0.01 0.74
 -2 11 -6 16.01 3.8
 -2 -11 -6 19.94 4.5
 -2 -11 -7 -0.26 1.27
 -2 11 -7 7.26 2.5
 -2 11 -8 9.06 3.43
 -2 -11 -8 7.83 2.83
 -2 11 -9 13.56 3.79
 -2 11 -10 -2.66 1.96
 2 -12 -11 -1.64 1.74
 2 -12 -10 -0.18 0.68
 2 -12 -9 6.54 3.09
 2 -12 -8 -1.25 2.12
 2 -12 -7 -0.46 1.45
 2 -12 -6 15.99 4.3
 2 -12 -5 26.23 4.74
 -2 12 5 32.96 6.09
 -2 12 4 130.19 11.91
 2 -12 -4 142.99 11.7
 2 -12 -3 15.96 3.79
 -2 12 3 9.4 3.3
 -2 12 2 35.6 5.9
 2 12 -2 33.29 4.1
 2 -12 -2 30.58 4.71
 2 -12 -1 62.27 6.12
 2 12 -1 56.27 5.71
 -2 12 1 47.53 6.5
 -2 12 0 16.98 3.71
 2 12 0 20.14 3.5
 -2 12 -1 0.87 0.96
 2 12 1 1.6 1.46
 -2 12 -2 7.19 2.29
 -2 12 -3 38.85 5.66
 -2 12 -4 0.07 0.73
 -2 -12 -4 -1.1 1.84
 -2 12 -5 9.89 3.33
 -2 -12 -5 3.28 1.31
 -2 -12 -6 1.34 2.13
 -2 12 -6 1.37 1.04
 -2 -12 -7 5.28 2.89
 -2 12 -7 7.45 3.18
 -2 12 -8 -0.12 0.82
 -2 -12 -8 2.05 1.97
 -2 -12 -9 2.09 1.97
 -2 12 -9 0.77 0.71
 -2 12 -10 -1.84 1.81
 2 -13 -11 0.9 2.32
 2 -13 -10 -3.02 2.26
 2 -13 -9 5.58 3.4
 2 -13 -8 -0.12 1.18
 2 -13 -7 -0.98 1.37
 2 -13 -6 -1.16 1.81
 2 -13 -5 4.17 2.2
 -2 13 5 1.81 1.08
 2 -13 -4 18.57 4.27
 -2 13 4 12.15 3.8
 2 -13 -3 6.41 2.73
 -2 13 3 5.83 2.68
 -2 13 2 3.46 2.32
 -2 13 1 52.69 7.03
 -2 13 0 2.61 1.7
 2 13 0 3.18 1.19
 -2 13 -1 17.1 3.78
 2 13 1 20.75 3.85
 -2 13 -2 12.63 3.57
 -2 13 -3 4.3 2.3
 -2 -13 -3 2.11 1.52
 -2 13 -4 3.47 1.85
 -2 -13 -4 -0.78 1.94
 -2 -13 -5 0.63 1.43
 -2 13 -5 -0.28 0.56
 -2 13 -6 -0.13 1.23
 -2 -13 -6 1.67 2.48
 -2 13 -7 23.51 5.11
 -2 -13 -7 -8.13 3.96
 -2 -13 -8 -1.55 1.69
 -2 13 -8 -1.39 1.38
 -2 13 -9 8.86 3.51
 -2 -13 -9 -1.35 1.49
 2 -14 -10 0.37 1.08
 2 -14 -9 -0.06 0.74
 2 -14 -8 0.46 0.74
 2 -14 -7 5.47 2.97
 2 -14 -6 6.36 2.99
 2 -14 -5 10.08 3.23
 -2 14 5 8.92 3.24
 -2 14 4 3.55 1.94
 -2 14 3 13.88 4.14
 -2 14 2 2.4 1.66
 -2 14 1 2.03 1.91
 -2 14 0 1.98 1.63
 -2 14 -1 22.83 4.5
 -2 14 -2 4.12 1.98
 -2 14 -3 3.04 2.16
 -2 -14 -3 -0.02 0.91
 -2 14 -4 0.3 1.04
 -2 -14 -4 0.99 1.26
 -2 14 -5 -0.82 1.14
 -2 -14 -5 -1.37 1.5
 -2 14 -6 1.71 1.23
 -2 -14 -6 0.01 0.63
 -2 14 -7 3.42 2.17
 -2 -14 -7 3.12 2.71
 -2 -14 -8 4.27 2.79
 -2 -14 -9 0.68 0.95
 2 -15 -10 -2.65 2.21
 2 -15 -9 -4.1 2.6
 -2 15 5 2.51 1.94
 -2 15 4 1.04 0.98
 -2 15 3 -2.74 2.09
 -2 15 2 0.07 1.18
 -2 15 1 3.62 2.18
 -2 15 0 0.97 0.71
 -2 15 -1 2.4 1.49
 -2 15 -2 1.73 1.32
 -2 -15 -3 -4.12 3.01
 -2 15 -3 0.67 0.91
 -2 -15 -4 4.68 2.76
 -2 15 -4 3.68 2.02
 -2 -15 -5 0 0.75
 -2 15 -5 -0.57 0.82
 -2 -15 -6 2.72 2.88
 -2 -15 -7 0.21 0.83
 -2 -15 -8 0.02 1.17
 -2 -15 -9 -2.61 2.13
 2 -16 -8 -1.32 1.5
 -2 16 4 4.49 3.17
 -2 16 3 -0.72 0.5
 -2 16 2 -0.54 0.83
 -2 16 1 2.59 1.8
 -2 16 0 3.53 2.12
 -2 16 -1 -0.26 0.8
 -2 16 -2 3.28 1.8
 -2 -16 -2 7.71 4.17
 -2 -16 -3 7.05 3.95
 -2 -16 -4 3.92 2.85
 -2 -16 -5 0 0.82
 -2 -16 -6 2.29 3.04
 -2 -16 -7 -1.12 1.5
 -2 -16 -8 4.37 2.85
 -2 17 4 -1.09 1.3
 -2 17 3 0.42 0.57
 -2 17 2 1.39 1.89
 -2 17 1 0.07 1.09
 -2 -17 -1 -3.36 2.56
 -2 -17 -2 0 1.45
 -2 -17 -3 0 2.69
 -2 -17 -4 2.13 2.49
 3 0 -15 2.85 1.91
 -3 0 14 -3.14 2.49
 3 0 -14 0.69 1.85
 3 0 -13 7.71 3.44
 -3 0 13 12.31 4.51
 -3 0 12 0.97 2.1
 3 0 -12 -1.32 2.06
 -3 0 11 0.99 1.78
 3 0 -11 6.01 2.98
 3 0 -10 1.12 2.29
 -3 0 10 0.77 1.19
 3 0 -9 6.2 2.64
 -3 0 9 4.28 2.27
 -3 0 8 -3.24 1.97
 3 0 -8 -1.22 1.85
 -3 0 7 18.32 4.02
 3 0 -7 14.43 3.47
 -3 0 6 -0.37 1.09
 3 0 -6 -0.33 1.35
 3 0 -5 2202.23 34.18
 -3 0 5 2114.9 35.31
 3 0 -4 -2.87 1.1
 3 0 -3 19.15 2.32
 3 0 -3 15.67 2.49
 -3 0 3 15.53 2.17
 -3 0 2 -0.17 0.45
 3 0 -2 0.31 0.61
 3 0 -2 -0.7 0.52
 -3 0 2 -1.47 0.99
 3 0 -1 408.06 9.36
 -3 0 1 391.49 11.14
 3 0 -1 392.16 11.13
 -3 0 1 392.47 9.28
 -3 0 1 418.3 11.26
 -3 0 0 3.28 1.2
 -3 0 0 -1.56 0.94
 3 0 0 0.8 1.93
 -3 0 -1 479.12 13.46
 3 0 1 541.3 13.89
 -3 0 -2 -3.39 1.84
 -3 0 -3 358.88 13.13
 -3 0 -4 0.87 1.86
 -3 0 -5 1741.85 33.64
 -3 0 -6 -1.74 1.72
 -3 0 -7 104.02 9.37
 -3 0 -8 -1.75 1.98
 -3 0 -9 2.7 2.23
 -3 0 -10 -1.94 1.85
 3 0 10 3.36 2.19
 -3 0 -11 -2.27 2.36
 3 0 11 2.23 1.79
 3 0 12 -1.33 1.54
 -3 0 -12 -1.94 2.41
 3 0 13 4.19 2.96
 -3 0 -13 0 1.13
 -3 0 -14 1.13 2.08
 3 0 14 0.52 2.04
 3 1 -16 0.99 1.7
 3 1 -15 -0.41 1.32
 3 -1 -15 2.44 2.49
 -3 1 14 4.27 2.74
 3 1 -14 3.08 2.23
 -3 -1 14 10.24 4.4
 3 -1 -14 6.86 3.43
 -3 1 13 20 5.71
 -3 -1 13 21.54 5.67
 3 -1 -13 15.65 4.92
 3 1 -13 15.97 4.78
 -3 1 12 4.09 2.46
 -3 -1 12 0.09 0.77
 3 -1 -12 -0.1 1.15
 3 1 -12 2.01 1.98
 -3 1 11 63.14 8.76
 -3 -1 11 61.28 8.7
 3 1 -11 67.69 8.77
 -3 -1 10 337.38 20
 3 1 -10 380.93 20
 -3 1 10 341.25 20.18
 -3 -1 9 -1.52 1.53
 3 1 -9 1.39 1.91
 -3 1 9 -0.29 1.23
 3 1 -8 117.4 9.74
 -3 -1 8 107.68 9.92
 -3 1 8 111.74 10.12
 -3 1 7 -0.9 1.88
 3 1 -7 1.31 1.34
 -3 -1 7 1.26 0.93
 3 -1 -7 -0.28 1.76
 -3 -1 6 259.28 13.36
 3 -1 -6 295.51 14.03
 3 1 -6 274.32 12.89
 -3 1 6 276.11 13.65
 -3 -1 5 195.8 10.72
 3 -1 -5 199.95 10.65
 -3 1 5 201.06 10.87
 3 1 -5 205.1 10.12
 3 1 -4 4.29 0.88
 3 -1 -4 4.45 1.44
 3 1 -4 5.73 1.53
 3 1 -4 4.72 1.16
 -3 1 4 4.43 1.43
 3 1 -3 12.34 1.74
 3 1 -3 12.96 1.72
 3 1 -3 12.52 2.44
 3 -1 -3 10.79 2.02
 -3 1 3 14.11 2.25
 -3 1 2 18.02 2.37
 -3 -1 2 23.6 2.67
 -3 -1 2 18.78 1.95
 -3 1 2 21.29 2.95
 -3 -1 2 16.15 2.15
 3 1 -2 15.72 2.18
 3 -1 -2 23.86 2.67
 3 -1 -2 21.57 2.98
 3 1 -2 18.7 1.88
 -3 1 1 0.93 0.67
 -3 -1 1 -4.18 1.12
 3 -1 -1 -0.28 0.58
 3 1 -1 1.53 0.73
 -3 1 1 -1.52 1.03
 -3 -1 1 -0.87 1.06
 3 -1 -1 -1.35 1.16
 3 -1 -1 -0.31 0.98
 3 1 -1 -11.39 2.95
 -3 1 1 -1.85 0.97
 -3 -1 1 -9.02 2.72
 -3 -1 0 -2.18 1.24
 -3 1 0 -0.19 0.89
 3 -1 0 1.56 0.58
 -3 1 0 1.26 0.3
 -3 1 0 3.66 1.09
 3 1 0 2.06 0.85
 3 -1 0 3.52 1.05
 -3 1 -1 3.48 0.56
 -3 1 -1 3.05 0.8
 -3 -1 -1 5.81 1.35
 3 -1 1 5.52 1.36
 3 1 1 4.4 1.21
 -3 1 -2 98.4 6.21
 -3 -1 -2 102.32 6.33
 -3 -1 -3 208.6 10.06
 -3 1 -3 191.21 9.52
 -3 1 -4 764.92 20.04
 -3 -1 -4 794.55 20.71
 -3 -1 -5 0.17 1.77
 -3 1 -5 0.12 1.45
 -3 1 -6 26.66 4.35
 -3 -1 -6 23.06 4.29
 -3 1 -7 -0.09 1.16
 -3 -1 -7 5.41 2.35
 -3 -1 -8 219.66 14.47
 -3 1 -8 223.01 14.58
 -3 -1 -9 1.05 1.05
 -3 1 -9 2.57 2.21
 3 1 10 3.19 2.03
 3 -1 10 3.92 3
 -3 1 -10 3.55 1.98
 -3 -1 -10 4.66 1.98
 3 -1 11 5.97 2.65
 -3 1 -11 7.41 3.31
 3 1 11 7.05 3.07
 -3 -1 -11 10.24 3.6
 -3 1 -12 0.57 1.97
 3 1 12 1.23 1.23
 3 -1 12 1.76 1.85
 -3 -1 -12 0.94 1.07
 3 1 13 3.92 2.87
 -3 -1 -13 0.62 1.33
 3 -1 13 4.24 2.67
 -3 1 -13 4.16 2.81
 -3 1 -14 12.2 4.93
 -3 -1 -14 17.73 6.04
 3 1 14 19.09 5.92
 3 -1 14 12.95 4.69
 3 2 -16 -0.73 1.5
 3 -2 -15 4.32 3.39
 3 2 -15 2.99 2.52
 -3 2 14 5.97 3.48
 -3 -2 14 5.95 2.96
 3 -2 -14 3.41 2.61
 3 2 -14 1.88 1.64
 3 2 -13 1.51 1.28
 -3 2 13 2.15 1.85
 -3 -2 13 2.01 1.52
 3 -2 -13 -0.99 2.17
 -3 2 12 2.63 1.16
 -3 -2 12 4.53 2.54
 3 -2 -12 1.99 0.89
 3 2 -12 6.87 3.06
 -3 2 11 20.55 5.08
 -3 -2 11 14.67 4.53
 3 2 -11 18.02 4.58
 -3 2 10 6.9 2.86
 -3 -2 10 4.39 2.21
 3 2 -10 5.98 2.81
 -3 2 9 1.55 1.62
 -3 -2 9 -1.01 2.17
 3 2 -9 2.12 1.21
 -3 -2 8 2.46 1.57
 3 2 -8 1.33 1.02
 -3 2 8 2.24 0.9
 -3 2 7 14.88 3.6
 3 -2 -7 12.45 3.21
 -3 -2 7 11.63 2.93
 3 2 -7 12.52 2.79
 3 2 -6 75.19 6.35
 3 -2 -6 68.53 6.92
 -3 2 6 72.41 6.93
 -3 -2 6 66.51 6.77
 -3 -2 5 100.05 7.7
 -3 2 5 105.28 7.91
 3 -2 -5 99.38 7.69
 3 2 -5 106.34 7.19
 3 2 -4 40.06 3.96
 3 -2 -4 41.9 4.64
 3 2 -4 38.24 3.29
 -3 2 4 40.56 4.45
 3 2 -3 178.44 7.81
 -3 -2 3 194.36 8.12
 3 -2 -3 196.12 9.58
 3 2 -3 202.39 7.61
 3 2 -3 181.11 6.21
 -3 2 3 187.35 8.98
 3 -2 -2 68.15 4.9
 -3 2 2 66.04 4.88
 -3 -2 2 65.51 4.85
 3 2 -2 71.57 4.67
 3 2 -2 63.34 2.81
 -3 -2 2 68.28 4.48
 3 2 -2 58.64 4.17
 -3 2 2 60.87 4.71
 -3 -2 1 311.76 9.55
 -3 2 1 290.62 9.65
 -3 -2 1 308.58 9.83
 3 2 -1 343.59 10.74
 3 -2 -1 289.81 9.86
 3 2 -1 279.08 9.49
 -3 2 1 278.21 9.64
 3 -2 -1 302.52 10.27
 -3 -2 1 286.63 5.02
 3 -2 -1 319.53 10.34
 -3 -2 0 238.43 8.72
 -3 2 0 230.9 8.36
 3 2 0 211.12 8.02
 -3 2 0 220.71 8.31
 3 -2 0 240.52 9.09
 3 2 0 245.78 9.33
 -3 2 0 191.94 7.95
 3 -2 0 242.47 9.14
 3 2 0 253.99 9.01
 3 -2 0 210.93 8.36
 -3 2 -1 23.96 2.82
 -3 2 -1 20.33 2.83
 -3 2 -1 27.72 2.82
 -3 -2 -1 29.1 3.09
 -3 -2 -1 21.19 2.84
 3 -2 1 28.53 3.24
 3 2 1 25.94 3.04
 -3 -2 -2 1249.63 22.65
 -3 2 -2 1246.76 22.07
 -3 2 -3 148.89 8.2
 -3 -2 -3 151.58 8.42
 -3 -2 -4 343.26 13.91
 -3 2 -4 332.29 13.19
 -3 2 -5 458.55 16.69
 -3 -2 -5 480.14 17.45
 -3 2 -6 61.24 6.66
 -3 -2 -6 60.26 6.78
 -3 -2 -7 44.12 6.22
 -3 2 -7 40.99 6.04
 -3 -2 -8 39.95 6.29
 -3 2 -8 38.05 6.08
 -3 2 -9 4.09 2.44
 -3 -2 -9 3.96 2.59
 3 -2 10 1.5 2.11
 3 2 10 1.29 1.04
 -3 2 -10 0.12 1.67
 -3 -2 -10 0.9 1.34
 3 2 11 5.02 3.32
 -3 -2 -11 2.97 2.17
 3 -2 11 1.64 1.83
 -3 2 -11 1.67 2.18
 3 -2 12 33.11 7.01
 -3 2 -12 31.23 6.55
 3 2 12 34.45 7.01
 -3 -2 -12 29.29 6.44
 -3 2 -13 2.77 2.74
 3 2 13 -2.61 2.88
 -3 -2 -13 -2.7 2.28
 3 -2 13 1.17 1.64
 -3 -2 -14 1.35 2.48
 3 2 14 2.71 2.17
 -3 2 -14 -1.83 1.79
 3 -2 14 0.54 2.06
 3 -3 -15 4.18 3.34
 -3 -3 14 1.01 2.04
 3 3 -14 3.04 2.44
 3 -3 -14 1.68 2.07
 -3 3 14 -0.98 1.51
 -3 3 13 21.83 5.68
 -3 -3 13 23.21 6.13
 3 3 -13 19.37 4.99
 3 -3 -13 22.31 5.61
 -3 3 12 8.54 3.08
 -3 -3 12 10.14 3.74
 3 3 -12 14.78 4.31
 -3 3 11 13.01 3.91
 3 3 -11 11.46 3.43
 -3 -3 11 14.14 4.34
 -3 3 10 3.07 1.88
 -3 -3 10 6.63 2.74
 3 3 -10 7.44 2.49
 3 3 -9 378.76 17.85
 -3 -3 9 329.96 18.68
 -3 3 9 345.37 19.07
 3 -3 -8 11.65 1.26
 -3 3 8 9.79 2.98
 -3 -3 8 8.69 2.73
 3 3 -8 11.78 2.65
 -3 3 7 6.43 2.08
 -3 -3 7 10.43 2.94
 3 3 -7 8.02 2.3
 -3 -3 6 39.38 5.29
 3 3 -6 50.65 5.21
 -3 3 6 45.44 5.61
 3 -3 -6 46.65 5.9
 -3 -3 5 48.85 3.55
 3 -3 -5 50.46 6.05
 -3 3 5 50.68 5.71
 3 3 -5 51.65 4.71
 3 3 -4 12.51 2.16
 -3 -3 4 12.43 1.98
 3 -3 -4 11.64 2.76
 -3 3 4 9.82 1.94
 -3 3 3 9.06 2.23
 3 3 -3 5.87 1.22
 3 3 -3 6.34 1.01
 -3 -3 3 6.09 1.59
 3 -3 -3 3.97 1.09
 -3 -3 3 6.96 1.49
 -3 -3 2 422.25 11.01
 3 -3 -2 401.19 12.86
 -3 -3 2 378.66 11.54
 -3 -3 2 392.1 12.2
 -3 3 2 371.7 12.58
 -3 3 2 395.68 11.72
 -3 3 1 79.01 5.53
 3 -3 -1 75.13 5.12
 3 -3 -1 73.18 4.95
 3 3 -1 70.48 4.75
 -3 -3 1 68.03 5.04
 -3 3 1 78.18 4.99
 -3 -3 1 76.73 5.02
 3 -3 0 0.52 0.65
 -3 3 0 1.3 0.72
 3 3 0 1.72 0.95
 -3 -3 0 1.1 0.53
 3 -3 0 1.24 0.7
 3 3 0 1.51 0.72
 -3 3 0 -0.73 0.91
 -3 3 0 0.33 0.23
 -3 -3 0 -0.55 0.74
 -3 3 -1 628.44 14.47
 -3 -3 -1 638.9 15.76
 -3 3 -1 667.03 14.63
 -3 -3 -1 695.43 15.77
 -3 3 -1 572.25 15.37
 -3 3 -1 575.66 14.07
 3 -3 1 708.96 16.47
 3 3 1 654.49 15.16
 -3 3 -2 1.83 1.1
 -3 -3 -2 0.93 0.92
 -3 3 -3 3.59 1.44
 -3 -3 -3 1.53 0.99
 -3 3 -4 6.38 2.07
 -3 -3 -4 3.92 1.72
 -3 3 -5 63.07 6.28
 -3 -3 -5 66.48 6.64
 -3 3 -6 126.75 9.57
 -3 -3 -6 126.64 9.89
 -3 3 -7 2.27 1.15
 -3 -3 -7 3.01 1.68
 -3 3 -8 9.12 2.97
 -3 -3 -8 5.4 2.36
 3 3 9 43.92 6.93
 -3 -3 -9 39.73 6.75
 3 -3 9 43.91 7.47
 -3 3 -9 41.69 6.78
 3 3 10 49.54 7.76
 3 -3 10 50.2 8
 -3 3 -10 42.88 7.2
 -3 -3 -10 46.4 7.48
 -3 -3 -11 1.64 1.86
 -3 3 -11 3.81 2.73
 3 3 11 0.24 0.89
 3 -3 11 3.1 3.05
 -3 3 -12 1.08 1.77
 -3 -3 -12 0.1 0.96
 3 -3 12 0.3 1.55
 3 3 12 -2.42 2.35
 3 3 13 4.36 2.86
 -3 3 -13 -1.64 1.73
 -3 -3 -13 0.81 1.3
 3 -3 13 6.21 3.25
 -3 -3 -14 21.98 6.57
 3 -3 14 15.97 4.78
 -3 3 -14 11.25 4.59
 3 3 14 21.53 6.13
 -3 -4 14 0 1.11
 3 -4 -14 2.42 2.11
 3 4 -13 4.89 2.51
 -3 -4 13 2.27 1.39
 -3 4 13 8.06 3.4
 3 -4 -13 3.71 1.67
 -3 4 12 1.9 1.07
 3 4 -12 6.68 2.26
 -3 -4 12 7.07 2.43
 3 4 -11 0.64 0.7
 -3 4 11 0.99 1.18
 -3 4 10 2.57 1.37
 -3 -4 10 5.36 2.75
 3 4 -10 5.01 2.23
 -3 -4 9 71.36 8.67
 -3 4 9 84.11 9.25
 3 4 -9 88.49 8.36
 -3 4 8 30.83 5.1
 3 4 -8 33.73 4.82
 -3 -4 8 30.82 5.27
 -3 -4 7 92.31 5.12
 3 4 -7 98.75 7.66
 -3 -4 7 80.52 8.06
 -3 4 7 91.35 8.51
 -3 4 6 -1.4 1.54
 -3 -4 6 0.65 0.71
 -3 -4 6 -1.19 1.07
 3 4 -6 -1 1.27
 3 -4 -6 -0.33 0.98
 3 4 -5 3.74 1.19
 -3 -4 5 4.5 1.26
 3 -4 -5 4.3 2.04
 -3 4 5 3.72 1.65
 -3 -4 4 200.3 8.53
 3 -4 -4 206.3 11.04
 3 4 -4 205.69 8.16
 -3 4 4 215.03 11.73
 -3 4 3 6.18 1.74
 -3 -4 3 3.24 1.08
 -3 -4 3 3.99 1.15
 3 -4 -3 2.45 0.68
 -3 4 2 88.17 5.58
 -3 -4 2 91.18 4.98
 -3 4 2 87.96 6.55
 -3 -4 2 85.92 5.66
 3 -4 -2 88.14 6.38
 -3 -4 2 84.28 5.9
 -3 4 1 12.58 1.84
 3 -4 -1 14.5 2.32
 -3 -4 1 14.97 2.48
 -3 4 1 15.25 2.08
 3 -4 -1 13.53 1.99
 3 4 -1 14.88 2.04
 -3 -4 1 16.03 2.36
 3 4 0 166.61 7.15
 -3 4 0 152.66 6.7
 -3 -4 0 179.94 7.69
 -3 4 0 151.79 8.12
 -3 -4 0 149.79 8.43
 3 -4 0 96.28 5.88
 3 -4 0 168.51 8.08
 -3 4 -1 1.14 0.52
 -3 -4 -1 -1.62 1.89
 3 4 1 0.92 0.3
 -3 4 -1 -0.79 0.97
 -3 -4 -1 0.63 0.69
 -3 4 -1 -2.01 2.11
 3 -4 1 0.08 0.69
 -3 4 -1 1.63 0.68
 -3 -4 -1 1.73 0.82
 -3 -4 -2 242.66 11.42
 -3 4 -2 249.36 11.13
 -3 4 -2 256.44 9.99
 -3 -4 -2 282.61 11.17
 -3 4 -3 686.15 17.41
 -3 -4 -3 730.34 18.83
 -3 4 -4 61.16 5.47
 -3 -4 -4 53.31 5.56
 -3 -4 -5 2.75 1.17
 -3 4 -5 0.34 1.01
 -3 4 -6 159.9 10.54
 -3 -4 -6 167.45 11.33
 -3 4 -7 1.59 0.74
 -3 -4 -7 -0.45 1.36
 -3 4 -8 8.75 2.93
 -3 -4 -8 11.17 3.46
 -3 -4 -9 11.56 3.6
 3 -4 9 18.83 5.04
 -3 4 -9 16.66 4.4
 3 4 9 15.81 4.37
 -3 -4 -10 9.38 3.65
 -3 4 -10 4.66 2.21
 3 -4 10 9.1 3.69
 3 4 10 8.72 3.13
 -3 4 -11 23.54 5.53
 3 4 11 27.67 6.05
 -3 -4 -11 20.52 5.31
 3 -4 11 21.98 5.18
 -3 4 -12 1.35 1.02
 3 -4 12 1.5 1.71
 -3 -4 -12 1.58 1.97
 3 4 12 0.79 1.55
 3 4 13 7.93 3.15
 -3 4 -13 7.05 3.68
 -3 -4 -13 3.8 3.07
 3 -4 13 7.83 3.67
 3 -4 14 -6.29 3.6
 -3 4 -14 5.86 3.94
 -3 -4 -14 1.97 2.59
 3 4 14 -4.14 3.45
 -3 5 14 -4.67 2.84
 -3 -5 14 1.48 1.74
 3 -5 -14 -3.24 2.97
 -3 -5 13 -0.58 1.17
 -3 5 13 3.12 3
 3 -5 -13 -0.18 1.97
 -3 5 12 -0.99 0.93
 -3 -5 12 0.21 0.91
 3 5 -12 1.97 1.98
 3 -5 -12 1.71 2.08
 3 5 -11 1.55 1.35
 -3 5 11 2.58 2.09
 -3 -5 11 0.3 1.23
 -3 5 10 11.53 3.58
 -3 -5 10 9.46 3.14
 3 5 -10 13.32 3.34
 -3 5 9 -1.46 2.02
 -3 -5 9 -1.64 1.63
 3 5 -9 0.43 1.21
 3 5 -8 -1.73 1.58
 -3 5 8 0.11 0.98
 -3 -5 8 0.86 1.17
 -3 -5 8 -0.2 0.6
 -3 5 7 21.61 4.32
 -3 -5 7 19.72 2.77
 -3 -5 7 21.17 4.39
 3 -5 -7 19.56 4.21
 3 5 -7 23.04 3.51
 3 5 -6 361.61 12.56
 -3 -5 6 333.7 11.81
 3 -5 -6 321.28 16.4
 3 -5 -5 151.77 10.46
 -3 -5 5 152.56 8.1
 -3 5 5 147.06 10.6
 3 5 -5 150.7 7.27
 -3 5 4 263.55 13.48
 -3 -5 4 255.04 10.72
 3 -5 -4 245.58 12.48
 3 5 -4 248.94 8.56
 -3 5 3 9.72 2.08
 -3 -5 3 7.57 1.51
 3 -5 -3 13.56 2.93
 -3 -5 3 14.3 2.75
 -3 5 2 38.72 4.62
 -3 -5 2 32.62 2.92
 -3 -5 2 38.52 4.4
 3 -5 -2 37.2 4.17
 3 5 -1 48.43 3.69
 -3 5 1 49.37 3.88
 -3 -5 1 50.78 4.25
 3 -5 -1 53.23 4.22
 3 -5 -1 55.09 4.81
 -3 -5 1 49.39 5
 -3 5 1 50.38 5.11
 -3 -5 0 5.42 0.94
 3 -5 0 6.29 1.55
 3 5 0 13.02 1.98
 -3 5 0 9.17 1.87
 3 -5 0 8.33 1.72
 -3 5 0 10.61 1.75
 -3 -5 0 11.88 2.58
 -3 -5 -1 18.36 2.69
 -3 5 -1 14.34 2.96
 3 -5 1 8.02 1.65
 3 5 1 16.45 2.24
 -3 -5 -1 14.56 2.29
 -3 5 -1 15.21 2.12
 -3 -5 -1 15.68 3.35
 -3 5 -1 14.6 2.14
 -3 -5 -1 6.67 1.34
 -3 -5 -2 26.48 3.79
 -3 -5 -2 28.88 3.47
 -3 5 -2 22.69 3.63
 -3 5 -2 25.17 2.92
 -3 -5 -2 19.32 2.46
 -3 -5 -3 85.22 7.24
 -3 -5 -3 91.04 6.94
 -3 5 -3 82.58 6.01
 -3 5 -4 45.56 4.87
 -3 -5 -4 46.66 5.33
 -3 -5 -5 -0.06 1.1
 -3 5 -5 2.5 1.28
 -3 5 -6 1.85 1.37
 -3 -5 -6 3.52 2.06
 -3 5 -7 86.55 8.41
 -3 -5 -7 89.27 8.9
 -3 5 -8 129.03 11.02
 -3 -5 -8 138.43 12.02
 -3 5 -9 -0.52 1.47
 3 -5 9 0.63 0.91
 3 5 9 -1.98 2.23
 -3 -5 -9 -0.26 1.8
 -3 -5 -10 34.68 6.62
 3 5 10 31.36 5.95
 3 -5 10 36.11 6.43
 -3 5 -10 34.67 6.53
 3 5 11 6.32 2.86
 -3 -5 -11 8.59 3.52
 3 -5 11 7.53 3.64
 -3 5 -11 6.64 3.04
 -3 5 -12 2.69 2.24
 -3 -5 -12 2.51 2.1
 3 -5 12 0.92 1.49
 3 5 12 3.75 2.14
 -3 5 -13 -3.13 2.31
 -3 -5 -13 -1.23 1.54
 3 -5 13 0.27 1.16
 -3 5 -14 10.91 5.05
 -3 -5 -14 8.95 4.85
 3 5 14 15.21 5.46
 3 -5 14 7.2 4.28
 -3 6 14 -2.63 2.18
 -3 -6 14 -0.43 1.08
 3 -6 -14 1.86 2.46
 -3 6 13 -1.24 1.69
 -3 -6 13 0.55 1.08
 3 -6 -13 -4.26 3.85
 -3 6 12 1.44 1.53
 3 -6 -12 2.94 2.35
 -3 -6 12 -1.92 2.4
 -3 6 11 2.72 1.51
 -3 -6 11 0.77 1.16
 3 -6 -11 2.1 1.41
 -3 6 10 1.28 1.47
 -3 -6 10 0.12 1.33
 3 6 -10 1.04 0.67
 -3 6 9 17.6 4.27
 -3 -6 9 13.2 3.34
 3 6 -9 20.31 3.63
 -3 6 8 90 9.04
 -3 -6 8 80.47 8.68
 -3 -6 8 87.06 6.21
 3 -6 -8 86.67 9.72
 3 6 -8 102.34 7.6
 3 -6 -7 7.74 2.99
 3 6 -7 4.48 1.26
 -3 -6 7 8.16 2.1
 -3 -6 6 39.64 4.48
 3 6 -6 41.63 3.98
 3 -6 -6 36.23 5.45
 -3 6 6 37.85 5.92
 -3 6 5 2.49 1.47
 -3 -6 5 1 0.98
 3 6 -5 1.28 0.31
 3 -6 -5 -0.14 1.53
 3 -6 -4 19.04 3.52
 -3 6 4 13.59 2.87
 -3 -6 4 15.6 2.76
 -3 6 3 0.39 1.41
 3 -6 -3 -1.07 1.49
 -3 -6 3 0.05 0.97
 -3 -6 3 0.16 0.37
 3 6 -3 0.14 0.24
 3 6 -2 74.58 2.51
 3 6 -2 73.17 4.87
 -3 -6 2 69.44 6.3
 3 -6 -2 70.59 6.15
 -3 6 2 69.32 6.39
 -3 -6 1 81.01 5.28
 -3 -6 1 91.31 7.23
 -3 6 1 89.24 5.08
 -3 6 1 90.86 7.37
 3 -6 -1 88.21 6.37
 3 -6 -1 93.45 5.57
 3 6 -1 87.63 5.02
 3 -6 -1 70.41 5.16
 3 6 -1 87 5.03
 -3 6 0 315.13 9.29
 -3 -6 0 296.65 10.11
 3 -6 0 330.23 11.88
 -3 6 0 319.65 13.65
 -3 -6 0 345.47 14.52
 3 6 0 340.24 10.08
 -3 -6 -1 2.12 0.81
 -3 6 -1 4.41 1.88
 -3 -6 -1 1.62 0.62
 -3 -6 -1 6.56 2.2
 -3 6 -1 2.73 1.03
 3 -6 1 2.14 0.85
 3 6 1 3.76 1.09
 -3 6 -2 566.34 14.44
 -3 -6 -2 595.8 16.41
 -3 6 -2 579.56 18.53
 -3 -6 -2 626.27 19.89
 -3 6 -3 14.37 2.93
 -3 -6 -3 20.28 4.01
 -3 6 -3 15.01 2.54
 -3 -6 -3 18.55 2.89
 -3 6 -4 6.6 1.85
 -3 -6 -4 3.65 1.16
 -3 -6 -4 5.31 1.88
 -3 -6 -5 -0.1 0.77
 -3 6 -5 0.67 0.75
 -3 6 -6 8.76 2.59
 -3 -6 -6 6.38 2.31
 -3 6 -7 1.66 1.79
 -3 -6 -7 -1.35 2.12
 3 -6 8 15.21 4.27
 -3 -6 -8 16.29 4.23
 -3 6 -8 15.66 3.67
 3 6 8 17.28 4.2
 -3 6 -9 27.41 5.41
 3 -6 9 29.48 5.9
 -3 -6 -9 26.41 5.41
 3 6 9 25.47 5.22
 3 -6 10 6.6 2.35
 -3 6 -10 7.1 3.1
 -3 -6 -10 5.13 2.34
 3 6 10 6.28 2.87
 -3 -6 -11 0.23 0.96
 -3 6 -11 0.4 0.69
 3 6 11 -2.63 2.44
 3 -6 11 -0.92 0.93
 -3 6 -12 -0.67 1.14
 -3 -6 -12 2.97 2.41
 3 -6 12 0.51 1.19
 3 6 13 7.11 3.17
 -3 -6 -13 4.01 2.92
 -3 6 -13 4.34 3.1
 3 -6 13 1.76 0.54
 -3 6 -14 0.12 0.9
 3 6 14 2.68 2.21
 -3 -6 -14 -0.97 1.46
 3 -6 14 3.97 3.94
 -3 -7 14 -1.85 1.54
 -3 7 14 0.89 1.33
 -3 7 13 0.81 0.91
 -3 -7 13 -1.25 2.14
 -3 -7 12 0.96 1.64
 -3 7 12 -2.81 2.06
 -3 -7 11 1.67 0.79
 -3 7 11 10.38 3.66
 3 -7 -11 7.18 3.02
 -3 7 10 -0.85 1.81
 -3 -7 10 -0.79 1.42
 3 -7 -10 1 1.32
 -3 -7 9 160.55 12.87
 3 -7 -9 170.67 14.35
 -3 7 9 195.84 14.05
 -3 -7 8 13.6 2.69
 3 7 -8 15.51 2.69
 3 -7 -8 12.93 4.05
 -3 -7 7 62.54 6.12
 3 7 -7 58.94 4.85
 3 -7 -7 51.81 7.1
 3 7 -6 34.39 3.31
 3 -7 -6 33.12 5.47
 -3 7 6 33.37 5.68
 3 -7 -5 50.04 6.36
 -3 7 5 49.28 6.58
 -3 7 4 106.76 9.19
 3 -7 -4 99.84 8.35
 3 7 -4 104.8 5
 3 -7 -3 273.63 13.43
 -3 7 3 253.99 13.46
 3 7 -3 255.59 6.68
 -3 7 2 13.64 3.09
 3 -7 -2 12.45 2.06
 3 -7 -2 14.22 2.31
 3 7 -2 16.2 2.29
 3 7 -2 14.25 2.23
 -3 -7 2 5.47 1.17
 3 7 -2 14.67 1.45
 3 -7 -2 13.83 2.77
 3 -7 -1 66.14 5.76
 -3 7 1 69.14 6.61
 -3 7 1 72.41 4.47
 -3 -7 1 67.27 4.6
 3 -7 -1 76.03 5.12
 3 7 -1 64.03 4.35
 -3 -7 1 72.64 6.86
 3 -7 -1 63.91 4.99
 3 7 -1 65.15 4.47
 -3 -7 0 35.14 4.78
 -3 7 0 38.44 4.86
 -3 7 0 41.23 3.37
 -3 -7 0 37.58 3.43
 -3 -7 0 21.36 2.53
 3 -7 0 42.16 4.47
 3 -7 0 26.42 3.09
 3 7 0 40.01 3.37
 3 -7 1 295.63 10.6
 3 7 1 308.39 9.65
 -3 -7 -1 187.42 8.31
 -3 -7 -1 318.67 15.26
 -3 7 -1 196.83 7.7
 -3 7 -1 317.98 13.99
 -3 -7 -1 290.28 10.49
 -3 -7 -2 67.34 6.94
 -3 7 -2 67.44 4.76
 -3 -7 -2 73.5 5.79
 -3 7 -2 67.71 6.63
 -3 -7 -3 75.75 7.54
 -3 7 -3 86.15 6
 -3 -7 -3 82.53 6.71
 -3 7 -3 69.35 6.88
 -3 -7 -4 150.79 9.73
 -3 -7 -4 133.31 10.58
 -3 7 -4 128.6 9.87
 -3 7 -4 137.25 8.17
 -3 7 -5 91.6 7.38
 -3 -7 -5 88.77 8.07
 -3 -7 -5 72.27 7.91
 -3 7 -6 384.08 16.24
 -3 -7 -6 414.46 18.2
 -3 7 -7 40.22 5.67
 -3 -7 -7 40.43 6.01
 -3 -7 -8 14.88 4.18
 3 -7 8 15.14 4.29
 3 7 8 16.62 3.69
 -3 7 -8 17.02 3.97
 -3 7 -9 49.96 7.19
 -3 -7 -9 57.53 8.05
 3 -7 9 63.86 8.61
 3 7 9 50.6 7.11
 -3 7 -10 0.73 1.05
 -3 -7 -10 0.22 1.03
 3 7 10 0.41 0.67
 3 -7 10 -1.43 1.62
 -3 7 -11 3.56 1.83
 -3 -7 -11 2.71 1.67
 3 7 11 3.6 1.94
 3 -7 11 0.72 1.26
 -3 7 -12 1.37 1.54
 -3 -7 -12 2.46 2.6
 3 -7 12 -1.19 0.62
 -3 7 -13 -0.34 0.91
 -3 -7 -13 2.57 2.94
 3 7 13 -0.62 0.89
 3 -7 13 3.11 2.85
 -3 -7 -14 1.39 1.68
 -3 7 -14 2.35 2.12
 3 7 14 3.12 2.45
 3 -7 14 3.89 2.83
 3 -8 -13 9.32 4.81
 3 -8 -12 1.68 2.44
 3 -8 -11 16.44 5.18
 3 -8 -10 1.84 1.66
 3 -8 -9 26.43 5.79
 -3 -8 8 12.76 2.93
 3 -8 -8 8.4 3
 3 -8 -7 6.29 3.28
 3 -8 -6 82.62 9.06
 -3 8 6 85.93 9.29
 3 8 -5 9.58 1.81
 3 -8 -5 8.64 3.05
 -3 8 5 8.6 3.1
 -3 8 4 13.79 3.2
 3 -8 -4 12.85 3.05
 3 8 -4 13.99 1.92
 -3 8 3 22.75 4.24
 3 -8 -3 26.97 4.28
 3 8 -3 27.05 2.4
 3 -8 -2 0.78 0.54
 3 8 -2 0.99 0.48
 3 -8 -2 0.26 0.77
 -3 8 2 -0.91 1.33
 3 8 -2 1.33 0.56
 3 -8 -2 1.6 0.91
 3 8 -2 1.4 0.72
 -3 -8 2 0.56 0.43
 3 -8 -1 20.8 3.25
 -3 8 1 20.17 3.79
 3 8 -1 13.84 2.02
 3 8 -1 20.51 2.14
 3 -8 -1 15.83 2.44
 3 8 -1 13.25 2.03
 3 -8 -1 6.88 1.35
 3 -8 0 331.35 10.9
 3 8 0 370.24 10.22
 -3 -8 0 488.04 19.57
 -3 -8 0 372.29 11.39
 -3 -8 0 429.97 11.87
 3 -8 0 482.62 15.42
 -3 8 0 443.8 17.3
 -3 8 0 467.19 10.94
 -3 -8 -1 182.21 12.16
 3 -8 1 153.03 7.53
 3 8 1 154.32 6.79
 -3 8 -1 165.82 6.5
 -3 8 -1 173.09 11.11
 -3 -8 -2 49.57 4.9
 -3 -8 -2 44.26 5.89
 -3 8 -2 31.34 3.1
 -3 8 -2 45.74 5.73
 -3 8 -3 7.9 2.35
 -3 -8 -3 7.24 2.29
 -3 -8 -3 10.05 2.19
 -3 8 -3 10.84 2.03
 -3 8 -3 6.49 1.55
 -3 8 -4 1.28 1.73
 -3 8 -4 0.09 0.41
 -3 -8 -4 2.3 0.97
 -3 -8 -5 20.83 4.64
 -3 -8 -5 20.62 3.63
 -3 8 -5 23 3.5
 -3 8 -5 19.61 3.98
 -3 -8 -6 0.01 1.01
 -3 8 -6 0.19 0.83
 -3 -8 -6 -1.34 1.92
 -3 -8 -7 26.46 4.49
 3 -8 7 30.35 5.25
 3 8 7 30.99 4.89
 -3 8 -7 28.72 4.7
 3 -8 8 7.43 2.87
 -3 8 -8 8.83 2.72
 -3 -8 -8 10.16 3.07
 3 8 8 9.55 2.83
 3 8 9 16.05 4.12
 -3 -8 -9 15.5 4.25
 -3 8 -9 14.81 3.82
 3 -8 9 12.02 3.53
 3 8 10 14.61 3.83
 3 -8 10 11.85 3.83
 -3 8 -10 12.16 3.81
 -3 -8 -10 9.81 3.36
 -3 -8 -11 -1.77 1.64
 3 8 11 0.43 0.73
 3 -8 11 -0.26 1.11
 -3 8 -11 1.38 1.51
 3 8 12 0.54 0.92
 3 -8 12 1.56 2.2
 -3 8 -12 0.37 0.71
 -3 -8 -12 3.06 2.87
 3 8 13 1.44 2.09
 3 -8 13 0.12 1.25
 -3 8 -13 4.46 2.92
 -3 -8 -13 0.07 0.58
 3 -8 14 0 1.9
 -3 8 -14 -0.87 1.31
 -3 -8 -14 -2.16 2.08
 3 8 14 0.21 1.4
 3 -9 -12 2.19 1.91
 3 -9 -11 2.43 2.41
 3 -9 -10 48.03 8.09
 3 -9 -9 4.6 2.05
 -3 -9 8 1.63 1.07
 3 -9 -8 -0.5 1.39
 3 -9 -7 34.48 6.25
 3 -9 -6 4.96 1.99
 3 9 -6 7.17 1.82
 -3 9 6 6.04 2.39
 3 -9 -5 20.2 3.76
 3 9 -5 25.57 2.97
 -3 9 5 21.14 4.6
 3 -9 -4 39.42 5.81
 -3 9 4 40.36 6.22
 3 9 -4 40.39 3.43
 -3 9 3 8.24 2.85
 3 9 -3 9.3 1.58
 3 -9 -3 10.19 2.2
 3 9 -3 10.14 1.89
 3 -9 -3 6.64 2.29
 -3 9 2 7.33 2.11
 3 -9 -2 6.06 1.52
 3 -9 -2 9.18 2.82
 3 -9 -2 12.21 2.13
 3 9 -2 5.4 1.24
 3 9 -2 11.18 1.7
 3 9 -2 10.57 1.7
 -3 -9 2 7.17 1.13
 3 -9 -2 5.84 1.36
 3 9 -2 6.63 1.48
 3 -9 -1 97.5 4.95
 3 -9 -1 94.99 5.55
 3 9 -1 131.71 6.16
 3 -9 -1 208.8 10.89
 3 9 -1 192.09 7.39
 -3 9 1 178.78 11.88
 3 9 -1 75.68 4.46
 3 -9 0 35.56 3.19
 -3 9 0 75.97 4.15
 -3 -9 0 67.45 4.35
 3 -9 0 72.72 5.88
 -3 -9 0 76.34 8.03
 3 9 0 36.16 2.95
 -3 9 0 73.79 7.49
 -3 -9 0 50.76 4.56
 -3 -9 -1 45.42 6.24
 -3 9 -1 43.26 3.25
 -3 9 -1 43.89 5.72
 -3 -9 -1 35.54 3.39
 -3 9 -2 27.22 4.62
 -3 9 -2 21.39 2.51
 -3 -9 -2 27.55 3.25
 -3 -9 -2 27.31 4.96
 -3 9 -3 13.25 2.35
 -3 -9 -3 13.2 3.44
 -3 -9 -3 15.81 2.96
 -3 9 -3 10.19 2.77
 -3 9 -4 16.94 2.85
 -3 9 -4 14.38 3.55
 -3 -9 -4 21.41 3.83
 -3 -9 -4 14.79 3.83
 -3 9 -5 2.19 0.57
 -3 -9 -5 2.14 1.24
 -3 9 -5 0.07 0.97
 -3 -9 -5 2.78 2.18
 -3 9 -6 116.13 8.84
 -3 -9 -6 125.74 10.41
 -3 -9 -6 109.63 10.44
 3 9 6 120.45 9.32
 3 -9 6 132.86 10.61
 -3 9 -6 119.04 10.81
 3 -9 7 21.81 4.38
 -3 9 -7 18.75 4.34
 -3 9 -7 22.7 4.45
 -3 -9 -7 25.1 5.07
 3 9 7 25.4 4.55
 -3 -9 -8 30.37 5.44
 3 -9 8 23.43 4.82
 3 9 8 28.83 5.03
 -3 9 -8 27.86 4.82
 3 9 9 0.98 0.98
 -3 9 -9 -0.38 1.11
 -3 -9 -9 0.75 1.03
 -3 9 -10 -0.82 1.25
 3 -9 10 -0.73 1.24
 3 9 10 1.54 1.38
 -3 9 -11 0.48 0.97
 -3 -9 -11 0.82 1.44
 3 9 11 1.49 1.58
 3 -9 11 -2.26 2.02
 3 9 12 -0.36 1.33
 -3 9 -12 0.89 1.15
 -3 -9 -12 0.18 1.66
 3 -9 12 2.94 2.41
 -3 9 -13 -0.56 0.87
 -3 -9 -13 0.4 1.65
 3 9 13 1.66 1.49
 3 -9 13 1.45 1.84
 -3 9 -14 0.02 0.41
 3 -9 14 -2.22 2.23
 3 -10 -12 3.82 3.26
 3 -10 -11 -2.71 2.23
 3 -10 -10 20.08 5.73
 3 -10 -9 0.18 1.91
 3 -10 -8 0.11 1.18
 -3 -10 8 1.57 1.4
 3 -10 -7 14.1 3.87
 -3 10 6 11.92 3.9
 3 -10 -6 8.05 3.17
 3 -10 -5 95.64 9.57
 -3 10 5 96.88 10.16
 -3 10 4 13.31 3.83
 3 10 -4 12.41 2.01
 3 -10 -4 10.08 2.62
 -3 10 3 32.74 5.49
 3 -10 -3 39.55 3.93
 3 10 -3 36.4 3.3
 3 -10 -3 33.92 5.11
 3 10 -3 33.56 3.12
 3 -10 -2 175.49 10.98
 -3 10 2 159.9 11.62
 3 10 -2 190.05 7.8
 -3 10 1 10.91 2.75
 3 -10 -1 10.81 2.24
 3 10 -1 12.43 2.03
 -3 10 0 46.77 6.15
 -3 10 -1 13.71 3.43
 -3 10 -1 16.36 1.72
 -3 -10 -1 16.1 2.05
 -3 -10 -1 15.6 3.8
 -3 10 -2 10.41 3.2
 -3 -10 -2 6.68 2.67
 -3 10 -2 8.09 1.38
 -3 -10 -3 19.49 4.66
 -3 10 -3 21.63 4.31
 -3 -10 -3 24.38 3.42
 -3 -10 -4 52.58 7.68
 3 -10 4 69.51 6.14
 -3 10 -4 65.16 5.32
 -3 10 -4 58.95 7.32
 -3 -10 -4 67.16 6.54
 -3 10 -5 34.53 5.87
 -3 -10 -5 34.55 6.24
 3 10 5 39.69 4.75
 3 -10 5 36.85 5.08
 -3 10 -5 34.26 4.32
 -3 -10 -5 34.82 4.97
 3 -10 6 27.9 4.81
 3 10 6 29.76 4.48
 -3 10 -6 22.49 4.71
 -3 -10 -6 29.65 5.63
 -3 10 -6 28.19 4.35
 -3 -10 -6 37.83 5.71
 -3 10 -7 1.5 1.52
 -3 -10 -7 0.71 1.43
 -3 -10 -7 0.11 1.96
 -3 10 -7 0.74 1.34
 3 -10 7 -0.13 1.09
 3 10 7 0.03 0.55
 -3 10 -8 0.26 0.78
 -3 10 -8 1.91 0.85
 -3 -10 -8 1.13 1.54
 3 10 8 1.92 1.31
 3 -10 8 4.85 2.55
 -3 -10 -9 -0.4 1.05
 -3 10 -9 -1.23 1.54
 3 10 9 -0.11 1.34
 3 -10 9 -2.01 2.2
 3 -10 10 10.37 3.47
 -3 -10 -10 9.1 3.5
 3 10 10 11.33 3.34
 -3 10 -10 10.83 3.62
 3 10 11 5.54 2.84
 -3 -10 -11 0.69 1.01
 3 10 12 8.58 3.54
 3 -11 -11 3.26 2.78
 3 -11 -10 10.2 4.08
 3 -11 -9 0.15 1.47
 -3 -11 8 0.31 1.12
 3 -11 -8 3.72 2.66
 3 -11 -7 5 2.48
 3 -11 -6 3.11 2.08
 -3 11 6 2.16 1.64
 3 -11 -5 28.75 5.37
 -3 11 5 33.14 6.14
 3 -11 -4 11.46 3.34
 -3 11 4 10.98 3.55
 -3 11 3 26.45 5.21
 3 -11 -3 30.47 4.86
 -3 11 2 98.22 9.45
 3 -11 -2 127.02 9.69
 3 11 -2 117.31 6.6
 3 -11 -1 21.17 3.81
 -3 11 1 16.39 3.79
 3 11 -1 20.53 2.81
 -3 11 0 125.93 10.73
 -3 -11 -1 68.68 8.69
 -3 11 -1 64.05 7.58
 -3 11 -2 25.39 4.92
 -3 -11 -2 25.15 5.22
 -3 11 -3 23.43 4.7
 -3 -11 -3 24.86 5.48
 -3 11 -4 9.79 3.07
 -3 -11 -4 10.47 3.53
 -3 -11 -5 0.65 0.92
 -3 11 -5 0.08 0.85
 -3 11 -6 20.06 4.32
 -3 -11 -6 24.44 5.38
 -3 11 -7 14.73 4.07
 -3 -11 -7 14.19 4.04
 -3 11 -8 3.54 1.88
 -3 11 -9 0.6 0.77
 -3 11 -10 1.31 1.47
 -3 11 -11 1.27 1.61
 3 -12 -11 -7.35 3.6
 3 -12 -10 0.96 1.98
 3 -12 -9 1.16 1.61
 -3 -12 8 3.23 2.56
 3 -12 -8 -2.61 2.15
 3 -12 -7 0.24 1
 3 -12 -6 9.77 4.02
 -3 12 6 4.5 2.72
 3 -12 -5 6.77 3.06
 -3 12 5 3.15 1.88
 3 -12 -4 -0.1 0.58
 -3 12 4 -2.83 2.44
 3 -12 -3 15.38 3.74
 -3 12 3 11.71 3.44
 -3 12 2 -0.47 1.31
 3 -12 -2 0.94 1.2
 -3 12 1 0.27 0.62
 3 -12 -1 0.45 1.09
 -3 12 0 16.9 4.02
 -3 -12 -1 106.55 11.61
 -3 12 -1 98.19 9.77
 -3 -12 -2 73.42 9.63
 -3 12 -2 63.38 7.76
 -3 -12 -3 8.78 3.37
 -3 12 -3 10.38 3.16
 -3 12 -4 -0.88 1.17
 -3 -12 -4 0.74 1.42
 -3 -12 -5 0.36 1.1
 -3 12 -5 4.85 2.3
 -3 12 -6 0.29 1.13
 -3 -12 -6 1.56 1.16
 -3 12 -7 7.37 2.97
 -3 -12 -7 2.46 1.74
 -3 12 -8 12.78 4.01
 -3 -12 -8 8.27 3.24
 -3 12 -9 -0.48 0.81
 -3 12 -10 0.77 1.33
 -3 12 -11 1.62 2.05
 -3 12 -12 2.22 3.07
 3 -13 -10 -3.94 2.62
 3 -13 -9 0.48 0.94
 3 -13 -8 0.98 1.25
 -3 -13 8 2.74 1.82
 3 -13 -7 3.24 2.13
 -3 13 6 15.49 4.37
 3 -13 -6 9.07 3.66
 3 -13 -5 0.3 1.12
 -3 13 5 2.8 2.11
 3 -13 -4 1.47 0.87
 -3 13 4 -1.31 1.59
 -3 13 3 12.9 3.64
 3 -13 -3 13.51 3.64
 -3 13 2 4.28 2.25
 -3 13 1 11.98 3.43
 -3 13 0 17.65 4.13
 -3 -13 0 24.44 5.53
 -3 13 -1 2.77 1.76
 -3 -13 -1 7.06 3.21
 -3 -13 -2 17.85 4.71
 -3 13 -2 13.31 3.75
 -3 13 -3 7.61 3.02
 -3 -13 -3 3.05 1.11
 -3 -13 -4 11.47 3.84
 -3 13 -4 10.83 3.37
 -3 -13 -5 5.07 2.82
 -3 13 -5 5.28 2.36
 -3 13 -6 0.52 1.26
 -3 -13 -6 -1.15 2.14
 -3 -13 -7 3.03 2.37
 -3 13 -7 -0.85 1.12
 -3 13 -8 1.54 1.71
 -3 -13 -8 4.08 2.78
 -3 13 -9 1.96 1.96
 -3 13 -10 0.1 0.66
 3 -14 -10 -0.04 2.09
 3 -14 -9 1.32 1.95
 3 -14 -8 -0.58 0.48
 -3 -14 8 1.42 1.69
 3 -14 -7 -5.12 3.62
 3 -14 -6 6.39 2.71
 -3 14 6 4.52 2.38
 -3 14 5 10.27 3.65
 3 -14 -5 12.4 3.67
 -3 14 4 1.14 1.54
 -3 14 3 14.46 4.18
 -3 14 2 5.24 2.24
 -3 14 1 5.1 2.12
 -3 14 0 0.39 0.76
 -3 -14 0 1.59 1.55
 -3 14 -1 9.75 3.24
 -3 -14 -1 12.79 4.21
 -3 14 -2 0.51 0.7
 -3 -14 -2 6.68 3.35
 -3 14 -3 8.38 2.94
 -3 -14 -3 11.19 3.91
 -3 14 -4 25.77 5.6
 -3 -14 -4 43.07 7.74
 -3 14 -5 -2.7 1.96
 -3 -14 -5 -3.02 2.2
 -3 14 -6 1.08 1.24
 -3 -14 -6 -0.03 1.21
 -3 14 -7 -0.6 1.44
 -3 -14 -7 -4.15 2.6
 -3 14 -8 0.87 1.25
 -3 -14 -8 -0.32 0.94
 3 -15 -9 -0.31 0.58
 3 -15 -8 1.46 1.58
 -3 -15 8 2.09 2.16
 -3 -15 7 1.04 1.07
 -3 15 6 0.88 1.54
 -3 15 5 7.28 3.47
 -3 15 4 -0.94 1.5
 -3 15 3 0.51 1.61
 -3 15 2 0.41 0.85
 -3 15 1 1.82 1.67
 -3 -15 1 5.73 2.73
 -3 15 0 -2.67 1.65
 -3 -15 0 -0.06 1.43
 -3 15 -1 0.82 1.03
 -3 -15 -1 3.64 1.79
 -3 15 -2 0.96 1.31
 -3 -15 -2 -1.79 2.47
 -3 15 -3 7.86 3.19
 -3 -15 -3 14.12 4.66
 -3 15 -4 3.68 2.22
 -3 -15 -4 3.95 2.5
 -3 15 -5 -0.43 1.12
 -3 -15 -5 -3.65 2.5
 -3 15 -6 -0.36 0.85
 -3 -15 -6 0 0.77
 -3 15 -7 0.35 1
 -3 -15 -7 0.31 0.92
 -3 -15 -8 1.78 2.47
 -3 -16 7 1.36 1.46
 -3 -16 6 1.58 1.72
 -3 -16 5 -1.75 2.17
 -3 16 5 -0.02 0.52
 -3 -16 4 0.92 1.45
 -3 16 4 -2.25 1.83
 -3 -16 3 -1.74 1.89
 -3 16 3 -1.42 1.39
 -3 16 2 -0.28 0.45
 -3 -16 2 3.15 2.84
 -3 16 1 1.84 1.42
 -3 -16 1 -0.12 1.63
 -3 16 0 -0.05 0.44
 -3 -16 0 -4.46 2.86
 -3 16 -1 2.59 1.84
 -3 -16 -1 4.48 2.86
 -3 16 -2 0.04 0.46
 -3 -16 -2 3.04 2.36
 -3 16 -3 1.63 1.61
 -3 -16 -3 -4.46 2.86
 -3 16 -4 1.86 1.83
 -3 -16 -4 6.81 3.95
 -3 -16 -5 1.38 2.35
 -3 -16 -6 -12.38 4.76
 -3 -16 -7 2.9 2.36
 -3 -17 5 -1.91 2.05
 -3 17 5 -0.52 1.71
 -3 -17 4 0.53 1.35
 -3 17 4 1.07 1.49
 -3 -17 3 2.46 2.89
 -3 17 3 -0.77 1.27
 -3 -17 2 2.49 2.2
 -3 17 2 -0.97 1.83
 -3 17 1 0.15 0.62
 -3 -17 1 1.1 2.17
 -3 17 0 -0.26 0.94
 -3 -17 0 2.37 3.15
 -3 -17 -1 -2.61 2.09
 -3 17 -1 0.29 0.61
 -3 17 -2 1.3 1.39
 -3 -17 -2 -4.83 2.96
 -3 -17 -3 -0.82 1.47
 -3 18 4 6.04 4.07
 -3 18 3 -0.36 1.68
 -3 18 2 -0.2 1.23
 4 0 -15 0.15 1.86
 -4 0 14 2.91 2.2
 4 0 -14 0.97 2.12
 -4 0 13 9.05 4.49
 4 0 -13 1.72 1.23
 -4 0 12 11.51 4.4
 4 0 -12 4.82 2.37
 4 0 -11 -0.58 0.91
 -4 0 11 5.01 3.05
 -4 0 10 121.05 12.06
 4 0 -10 112.38 11.21
 -4 0 9 -0.12 0.99
 4 0 -9 1.1 1.43
 -4 0 8 13.96 4
 4 0 -8 18.49 3.99
 4 0 -7 1.66 1.12
 4 0 -6 1.21 0.42
 4 0 -6 3.43 1.3
 4 0 -5 1.45 1.58
 4 0 -4 2833.42 38.94
 -4 0 4 2768.76 34.62
 -4 0 3 -1.8 1.16
 4 0 -3 -0.34 0.67
 -4 0 3 -0.45 1.19
 4 0 -3 0.77 0.83
 -4 0 2 211.56 9.92
 -4 0 2 204.51 7.85
 4 0 -2 223.77 8.17
 4 0 -2 212.29 9.82
 -4 0 1 2.87 1.54
 -4 0 1 1.33 0.99
 4 0 -1 0.14 0.3
 4 0 -1 1.51 1.2
 4 0 0 0.15 0.84
 -4 0 0 1.47 1.02
 -4 0 -1 0.78 1.2
 -4 0 -2 58.08 5.46
 -4 0 -3 -0.49 0.93
 -4 0 -4 238.12 12.33
 -4 0 -5 0.63 1.23
 -4 0 -6 30.17 4.84
 -4 0 -7 -0.8 1.65
 -4 0 -8 15.18 3.93
 -4 0 -9 3.82 2.63
 -4 0 -10 14.4 4.36
 4 0 11 -1.55 1.45
 -4 0 -11 4.22 2.72
 -4 0 -12 0.97 0.99
 4 0 12 -0.86 1.91
 -4 0 -13 -0.25 0.94
 4 0 13 -2.86 2.72
 -4 0 -14 7.25 4
 4 0 14 8.5 3.84
 4 1 -15 2.88 2.17
 4 -1 -15 2.73 2.23
 -4 1 14 1.11 2.7
 4 -1 -14 -4.58 2.92
 -4 -1 14 4.06 3.26
 4 1 -14 -1.65 1.77
 -4 1 13 3.04 2.15
 4 -1 -13 -1.98 2.31
 4 1 -13 1.9 1.83
 4 -1 -12 2.71 1.63
 -4 1 12 -0.69 1.27
 4 1 -12 -1.09 1.24
 -4 -1 12 -0.94 1.63
 -4 1 11 16.32 4.7
 -4 -1 11 14.16 4.23
 4 1 -11 20.29 4.67
 4 -1 -11 16.32 4.51
 4 -1 -10 4.11 2.38
 -4 1 10 3.99 2.52
 -4 -1 10 0.03 1.13
 4 1 -10 3.13 2.27
 -4 1 9 34.62 5.99
 -4 -1 9 38.26 6.37
 4 -1 -9 37.88 6.1
 4 1 -9 36.84 6.05
 -4 1 8 1.99 1.63
 4 -1 -8 3.92 2.44
 4 1 -8 0.76 1.01
 4 -1 -7 21.64 1.62
 4 -1 -7 35.14 5.31
 4 1 -7 40.31 5.68
 4 1 -6 27.05 4.13
 4 -1 -6 26.7 4.59
 4 -1 -5 518.94 18.76
 4 1 -5 538.07 17.59
 4 1 -4 68.18 5.84
 4 1 -4 69.04 4.77
 4 -1 -4 64.91 6.36
 -4 1 4 66.48 5.85
 -4 1 3 13.62 2.45
 4 1 -3 13.3 1.85
 -4 -1 3 10.5 1.82
 -4 1 3 13.8 2.86
 -4 -1 3 9.54 2.02
 4 1 -3 11.7 2.12
 4 -1 -3 10.72 2.16
 -4 -1 2 14.01 1.94
 -4 1 2 12.41 2.08
 -4 1 2 14.37 2.37
 -4 -1 2 18.19 3.05
 4 -1 -2 14.11 2.39
 4 1 -2 18.56 3.08
 4 1 -2 15.77 1.88
 -4 1 1 130.32 7.27
 -4 -1 1 133.19 7.45
 -4 1 1 132.37 6.73
 4 -1 -1 133.74 7.44
 4 1 -1 128.61 7.35
 -4 -1 1 136.24 5.78
 4 -1 -1 152.18 7.24
 4 -1 0 403.04 13.43
 4 1 0 415.16 13.39
 -4 1 0 400.74 11.71
 -4 -1 0 406.16 10.12
 -4 1 -1 9.98 2.4
 -4 -1 -1 9.07 2.12
 -4 -1 -2 1.87 1.59
 -4 1 -2 0.71 0.79
 -4 1 -3 81.89 6.76
 -4 -1 -3 75.85 6.62
 -4 1 -4 47.44 5.62
 -4 -1 -4 47.16 5.46
 -4 1 -5 20.13 3.66
 -4 -1 -5 22.93 3.97
 -4 -1 -6 9.62 2.81
 -4 1 -6 10.46 2.74
 -4 1 -7 123.54 10.6
 -4 -1 -7 121.61 10.64
 -4 1 -8 -0.65 1.37
 -4 -1 -8 0.78 1.19
 -4 1 -9 2.42 1.18
 -4 -1 -9 1.27 1.78
 -4 1 -10 6.34 3.04
 -4 -1 -10 5.81 2.56
 -4 1 -11 46.59 8.06
 -4 -1 -11 46.07 8.14
 4 -1 11 54.84 8.98
 4 1 11 58.28 9.12
 -4 1 -12 6.71 2.95
 -4 -1 -12 2.64 1.5
 4 -1 12 4.29 3.12
 4 1 12 5.18 2.45
 4 -1 13 26.44 6.69
 -4 1 -13 16.51 5.16
 -4 -1 -13 18.51 5.43
 4 1 13 20.93 5.87
 -4 1 -14 2.49 1.01
 4 -1 14 1.56 1.41
 4 1 14 1.05 1.93
 4 2 -15 0.44 1.6
 4 -2 -15 0.14 1
 -4 2 14 3.21 2.3
 -4 -2 14 9.52 4.68
 4 -2 -14 7.11 3.44
 4 2 -14 8.17 3.62
 -4 2 13 9.37 3.92
 -4 -2 13 4.03 2.38
 4 -2 -13 3.45 2.84
 4 2 -13 4.98 2.86
 -4 2 12 16.43 5.19
 -4 -2 12 9.13 3.48
 4 -2 -12 17.3 5.07
 4 2 -12 11.45 3.64
 4 -2 -11 7.74 3.01
 -4 2 11 7.73 3.6
 -4 -2 11 8.35 3.29
 4 2 -11 7.52 2.66
 -4 2 10 2.42 2.14
 -4 -2 10 1.23 1.41
 4 -2 -10 -1.15 1.88
 4 2 -10 1.91 0.98
 -4 2 9 7.85 3.36
 -4 -2 9 2.69 1.96
 4 -2 -9 3.25 1.35
 4 2 -9 4.21 1.72
 4 -2 -8 89 9.16
 4 2 -8 86.95 8.44
 4 2 -7 252.87 13.52
 4 -2 -7 241.69 14.55
 4 -2 -6 623.73 21.81
 4 2 -6 641.31 20.02
 4 2 -5 348.72 13.61
 4 -2 -5 355.39 15.75
 -4 2 5 349.18 14.74
 4 2 -4 421.5 10.96
 4 2 -4 441.65 14.57
 4 2 -4 442.44 12.63
 4 -2 -4 459.17 16.59
 -4 2 4 448.42 16.04
 4 2 -3 366.92 9.13
 -4 2 3 344.08 13.1
 -4 -2 3 363 13.56
 4 -2 -3 357.08 13.97
 4 2 -3 352.42 12.39
 -4 2 3 332.8 12.55
 -4 2 2 55.92 4.96
 -4 -2 2 57.44 5.09
 4 -2 -2 49.17 4.84
 -4 -2 2 55.09 3.18
 -4 2 2 54.4 4.67
 4 2 -2 55.83 2.96
 -4 2 1 2274.64 30.52
 -4 -2 1 2361.21 31.75
 4 -2 -1 2309.94 31.26
 4 2 -1 2351 30.59
 -4 2 1 2311.38 30.8
 4 -2 -1 2356.25 32.97
 4 -2 0 161.1 8.27
 4 2 0 147.57 8.04
 -4 2 0 139.28 7.51
 -4 2 -1 1536.18 25.8
 -4 -2 -1 1597.5 27.21
 -4 2 -1 1535.65 25.99
 -4 2 -2 4.21 1.71
 -4 -2 -2 -3.29 1.7
 -4 2 -3 398.44 14.9
 -4 -2 -3 431.33 15.83
 -4 -2 -4 25.57 3.93
 -4 2 -4 29.87 4.24
 -4 -2 -5 9.93 2.73
 -4 2 -5 9.23 2.68
 -4 2 -6 52.59 6.45
 -4 -2 -6 51.17 6.4
 -4 2 -7 9.28 2.89
 -4 -2 -7 6.44 2.28
 -4 2 -8 11.99 3.59
 -4 -2 -8 9.92 3.22
 -4 2 -9 15.83 4.43
 -4 -2 -9 17.34 4.33
 -4 -2 -10 2.39 1.54
 -4 2 -10 2.87 2.02
 -4 -2 -11 32.54 6.6
 -4 2 -11 36.53 7.06
 4 -2 11 28.83 6.57
 4 2 11 32.59 6.82
 4 -2 12 16.5 5.38
 4 2 12 10.81 4.12
 -4 2 -12 9.67 3.84
 -4 -2 -12 9.08 3.88
 -4 -2 -13 1.52 1.02
 4 -2 13 -1.51 2.35
 4 2 13 -0.54 2.31
 -4 2 -14 -3.93 2.74
 -4 -2 -14 3.12 2.77
 4 -2 14 1.06 1.68
 4 2 14 -0.92 1.48
 -4 3 14 17.3 5.53
 4 -3 -14 10.61 4.21
 4 3 -14 23.13 6.13
 -4 3 13 5.29 2.9
 4 3 -13 4.82 2.62
 4 -3 -13 5.26 3.11
 -4 -3 13 2.79 2.09
 -4 3 12 0.59 1.28
 -4 -3 12 -3.77 2.88
 4 -3 -12 -1.05 2.8
 4 3 -12 1.8 1.94
 -4 -3 11 7.92 3.2
 -4 3 11 5.68 3.15
 4 -3 -11 4.59 2.59
 4 3 -11 8.31 3.04
 -4 3 10 7.35 2.96
 -4 -3 10 5.75 2.14
 4 -3 -10 5.94 2.22
 4 3 -10 4.06 0.85
 -4 3 9 0.29 0.91
 4 3 -9 1.1 1.88
 4 -3 -9 -0.62 1.77
 4 3 -8 5.65 2.53
 4 -3 -8 4.89 2.09
 4 3 -7 52.26 5.8
 4 -3 -7 50.32 6.67
 4 3 -6 95.24 7.33
 4 -3 -6 98.52 8.87
 4 -3 -5 11.31 3.28
 4 3 -5 10.81 2.5
 -4 3 5 9.38 2.6
 4 3 -5 9.44 1.78
 4 -3 -4 73.58 6.97
 4 3 -4 75.27 5.77
 -4 3 4 76.19 6.84
 4 3 -4 64.78 3.99
 4 -3 -3 777.74 21.26
 -4 3 3 760.32 19.91
 4 3 -3 758.69 11.34
 -4 3 2 54.93 4.85
 -4 -3 2 60.03 5.18
 4 -3 -2 54.54 5.35
 -4 3 2 56.01 5.3
 -4 3 1 65.06 5.11
 -4 -3 1 64.29 5.33
 4 -3 -1 67.56 5.2
 4 3 -1 62.08 5.01
 4 -3 -1 67.78 5.74
 -4 -3 1 62.92 2.37
 -4 3 1 63.06 5.39
 4 -3 0 159.85 8.45
 4 3 0 148.29 7.79
 -4 3 0 145.14 8.01
 -4 3 -1 357.57 13.02
 -4 3 -1 356.22 12.5
 -4 -3 -1 367.81 13.22
 -4 3 -2 838.39 19.79
 -4 -3 -2 872.53 21.44
 -4 3 -3 12.74 2.74
 -4 -3 -3 14.49 2.86
 -4 3 -4 90.2 7.19
 -4 -3 -4 97.16 7.96
 -4 3 -5 58.25 6.34
 -4 -3 -5 62.34 6.86
 -4 3 -6 47.67 6.16
 -4 -3 -6 47.28 6.18
 -4 3 -7 3.67 2.06
 -4 -3 -7 0.16 1.28
 -4 3 -8 50.09 7.03
 -4 -3 -8 52.53 7.35
 -4 3 -9 38.97 6.6
 -4 -3 -9 34.92 6.32
 -4 3 -10 3.88 2.26
 -4 -3 -10 4.23 2.59
 -4 3 -11 2.76 1.49
 -4 -3 -11 4.69 2.1
 4 3 11 1.65 1.27
 4 -3 11 4.63 2.57
 -4 3 -12 3.36 2.48
 -4 -3 -12 5.54 2.83
 4 -3 12 3.49 1.26
 4 3 12 3.45 2.53
 -4 3 -13 1.5 1.9
 4 3 13 3.73 2.82
 4 -3 13 0.37 1.29
 -4 3 -14 -1.61 1.88
 4 3 14 4.07 3.65
 4 -3 14 0.97 1.62
 4 -4 -14 0.39 1.55
 4 -4 -13 2.41 1.22
 4 4 -13 -2.35 1.29
 -4 4 12 0.54 1.85
 4 4 -12 1.26 1.38
 4 -4 -12 -1.74 1.87
 -4 4 11 -1.54 2.01
 4 4 -11 -0.22 1.86
 4 -4 -11 -2.69 2
 4 4 -10 87.68 9.03
 4 -4 -10 76.4 9.71
 4 -4 -9 0.68 1.33
 4 4 -9 2.94 1.31
 4 -4 -8 176.92 13.76
 4 4 -8 202.13 12.16
 4 4 -7 57.51 6.03
 4 -4 -7 55.55 7.32
 4 4 -6 46 4.97
 4 -4 -6 42.57 5.94
 -4 4 6 43.17 5.89
 4 -4 -5 424.22 18.1
 4 4 -5 403.89 13.7
 -4 4 5 386.35 17
 4 4 -4 1.48 0.48
 -4 4 4 -0.49 1.56
 4 -4 -4 2.63 1.65
 4 4 -4 0.51 0.7
 -4 4 3 19.61 3.24
 4 -4 -3 20.29 3.45
 4 4 -3 19.87 1.3
 -4 4 2 14.38 2.93
 -4 4 2 15.09 2.57
 4 4 -2 16.98 2.83
 -4 -4 2 17.28 2.82
 4 -4 -2 14.6 3.15
 -4 4 1 257.09 10.3
 -4 -4 1 277.35 11.23
 4 -4 -1 280.39 11.91
 4 -4 -1 268.85 10.82
 4 4 -1 257.02 9.99
 -4 4 1 256.2 11.54
 -4 4 0 87.5 6.69
 -4 -4 -1 625.91 17.4
 -4 4 -1 557.81 17.36
 -4 4 -2 644.89 17.25
 -4 -4 -2 698.57 19.38
 -4 4 -2 677.16 19.88
 -4 4 -3 4.24 1.45
 -4 -4 -3 6.52 2.03
 -4 4 -4 10.8 2.46
 -4 -4 -4 12.06 2.66
 -4 4 -5 6.93 2.31
 -4 -4 -5 8.18 2.26
 -4 4 -6 12.9 3.3
 -4 -4 -6 11.94 3.26
 -4 -4 -7 0.92 0.93
 -4 4 -7 -0.29 0.78
 -4 -4 -8 -0.6 1.42
 -4 4 -8 2.15 2.04
 -4 4 -9 241.75 16.42
 -4 -4 -9 260.88 17.38
 -4 4 -10 8.03 2.87
 -4 -4 -10 9.58 3.5
 4 4 10 13.61 4.19
 4 -4 10 9.67 3.7
 -4 4 -11 -2.24 1.56
 -4 -4 -11 -1.25 1.67
 4 4 11 2.13 2.4
 4 -4 11 0.84 1.35
 -4 4 -12 1.79 1.82
 -4 -4 -12 1.16 1.56
 4 -4 12 -0.97 1.99
 4 4 12 0.29 1.5
 -4 4 -13 -0.32 1.05
 -4 -4 -13 0 1.29
 4 4 13 1.12 1.35
 4 -4 13 1.06 1
 -4 4 -14 2.71 3.23
 4 4 14 0.22 0.89
 4 -4 14 2.66 2.93
 -4 -4 -14 1.26 2.17
 4 -5 -14 18.12 5.77
 4 -5 -13 3.13 2.1
 4 -5 -12 9.39 4.09
 4 5 -11 0.69 1.36
 4 -5 -11 2.56 1.83
 4 5 -10 7.72 2.66
 4 -5 -10 9.64 3.47
 4 5 -9 23.41 4.4
 4 -5 -9 20.59 5.08
 4 5 -8 13.59 2.9
 4 -5 -8 10.67 3.27
 4 5 -7 394.93 15.41
 4 -5 -7 373.4 18.96
 4 -5 -6 40.79 5.92
 4 5 -6 43.77 4.73
 -4 -5 6 43.01 4.39
 -4 5 6 42.75 6.24
 -4 -5 5 8.85 2.15
 4 -5 -5 8.41 2.54
 4 5 -5 9.08 2.02
 4 5 -5 3.68 0.9
 -4 5 5 5.87 2.19
 4 5 -4 162.94 5.13
 -4 -5 4 179.56 9.59
 4 -5 -4 189.96 11.53
 -4 5 4 182.53 11.58
 4 -5 -3 334.01 14.69
 -4 5 3 313.52 14.12
 -4 -5 3 337.55 13.49
 -4 5 2 16.1 3.39
 -4 5 2 13.33 2.54
 -4 -5 2 12.24 2.54
 4 -5 -2 11.57 2.48
 4 5 -2 12.06 2.3
 -4 -5 2 11.38 2.47
 4 -5 -2 14.46 2.82
 -4 5 1 160.32 8.26
 -4 -5 1 181.13 9.4
 4 -5 -1 163.43 9.44
 4 -5 -1 163.2 8.4
 4 5 -1 150.86 7.7
 -4 -5 1 157.89 9.38
 -4 5 1 152.85 9.46
 -4 5 0 199.59 8.74
 -4 -5 0 218.74 11.48
 -4 5 0 204.3 11.15
 -4 5 -1 5.84 1.88
 -4 -5 -1 6.31 2.05
 -4 -5 -1 2.58 0.86
 -4 5 -2 25.56 4.16
 -4 5 -2 23.95 3.3
 -4 -5 -2 28.31 3.88
 -4 5 -3 43.75 5.54
 -4 5 -3 40.53 4.59
 -4 -5 -3 46.04 5.41
 -4 5 -4 5.69 1.78
 -4 -5 -4 8.57 2.48
 -4 5 -5 49.37 5.74
 -4 -5 -5 49.58 6.2
 -4 -5 -6 14.25 3.44
 -4 5 -6 11.76 3.22
 -4 5 -7 17.94 3.94
 -4 -5 -7 19.28 4.2
 -4 -5 -8 0.78 1.32
 -4 5 -8 -1.48 1.54
 -4 5 -9 1.71 1.05
 -4 -5 -9 2.61 2.34
 4 -5 10 1.37 1.53
 4 5 10 -0.7 1.6
 -4 5 -10 1.66 1.43
 -4 -5 -10 1.94 1.83
 4 -5 11 15.55 4.85
 4 5 11 30.32 6.48
 -4 5 -11 24.51 5.91
 -4 -5 -11 18.97 5.08
 4 -5 12 1.27 2.03
 4 5 12 1.38 1.37
 -4 -5 -12 -3.08 2.3
 -4 5 -12 0.58 1.41
 4 5 13 -1.08 1.42
 4 -5 13 1.77 2.13
 -4 5 -13 0.8 1.49
 -4 -5 -13 1.12 2.16
 -4 5 -14 0.16 1.81
 -4 -5 -14 -1.9 2
 4 5 14 2.94 2.54
 4 -5 14 -1.41 1.82
 4 -6 -13 4.56 3.09
 4 -6 -12 2.82 1.44
 4 -6 -11 2.73 2.34
 4 -6 -10 11.61 3.89
 4 6 -10 15.42 3.71
 4 6 -9 74.72 7.43
 4 -6 -9 61.18 8.65
 -4 -6 8 162.79 8.83
 4 -6 -8 151.08 12.82
 4 6 -8 164.71 10.15
 4 6 -7 76.68 6.35
 -4 -6 7 71.26 6.03
 4 -6 -7 65.92 8.26
 4 6 -6 75.79 5.88
 -4 -6 6 73.41 6.45
 4 -6 -6 64.16 7.77
 -4 6 6 71.14 8.12
 -4 -6 5 61.28 5.82
 -4 6 5 64.09 7.63
 4 -6 -5 65.54 7.47
 -4 6 4 8.64 2.81
 -4 -6 4 7.7 1.96
 4 6 -4 8.69 1.02
 4 -6 -4 5.35 1.83
 4 6 -4 6.81 0.9
 4 -6 -3 450.7 17.42
 -4 -6 3 447.42 16.74
 -4 6 3 436.28 17.45
 -4 -6 3 413.16 12.35
 -4 6 2 23.27 3.93
 -4 6 2 27.07 3.43
 -4 -6 2 21.22 3.65
 4 -6 -2 23.55 3.74
 -4 -6 2 26.37 3.39
 4 6 -2 24.94 3.16
 4 -6 -2 26.07 3.6
 -4 -6 2 22.41 2.92
 -4 6 1 169.84 8.31
 -4 -6 1 171.52 8.9
 4 -6 -1 187.25 9.31
 4 6 -1 166 8.14
 -4 -6 1 181.78 10.78
 4 -6 -1 173.85 9.9
 -4 6 1 165.61 10.42
 -4 6 0 855.68 17.77
 -4 -6 0 863.1 19.53
 -4 -6 0 911.73 25.11
 -4 6 0 896.47 24.19
 -4 -6 -1 498.57 19.08
 -4 6 -1 475.66 17.24
 -4 -6 -2 81.24 6.55
 -4 -6 -2 74.6 7.15
 -4 6 -2 70.82 6.89
 -4 6 -2 72.2 5.58
 -4 6 -3 -0.59 1.57
 -4 6 -3 -1.22 1.08
 -4 -6 -3 0.22 1.06
 -4 6 -4 1.25 0.81
 -4 -6 -4 2.06 1.19
 -4 6 -5 35.43 4.92
 -4 -6 -5 40.07 5.89
 -4 6 -6 31.28 5.01
 -4 -6 -6 30.89 5.41
 -4 -6 -7 4.78 2.63
 -4 6 -7 4.63 2.31
 -4 6 -8 72.85 8.44
 -4 -6 -8 80.02 9.46
 -4 6 -9 11.91 3.82
 -4 -6 -9 8.03 3.16
 4 6 10 3.78 2.67
 4 -6 10 3.45 1.94
 -4 6 -10 1.64 1.4
 -4 -6 -10 3.61 1.97
 -4 6 -11 5.57 2.64
 4 -6 11 4.48 3.44
 4 6 11 3.89 2.24
 -4 -6 -11 5.95 2.74
 4 6 12 9.21 3.5
 4 -6 12 5.74 3.24
 -4 -6 -12 7.27 3.9
 -4 6 -12 -2.54 1.98
 -4 6 -13 6.3 3.44
 -4 -6 -13 7.58 4.31
 4 6 13 14.96 4.98
 4 -6 13 9.53 4.54
 -4 6 -14 -1.53 1.79
 4 -6 14 1.36 3.23
 -4 -6 -14 -1.01 1.53
 4 6 14 -3.1 2.43
 4 -7 -13 -2.13 1.11
 4 -7 -12 -0.8 1.57
 4 -7 -11 2.77 2.23
 4 -7 -10 13.21 4.32
 4 -7 -9 5.08 2.62
 4 7 -8 13.91 2.71
 4 -7 -8 13.2 4.02
 -4 -7 8 13.63 2.69
 -4 -7 7 1.83 1.11
 4 7 -7 1.34 0.77
 -4 -7 6 28.27 4.22
 4 -7 -6 31.35 5.5
 -4 7 6 27.84 5.27
 -4 -7 5 19.51 3.45
 4 -7 -5 17.14 3.9
 -4 7 5 18.65 4.16
 -4 7 4 8.47 2.82
 -4 -7 4 10.03 2.62
 4 -7 -4 10.98 3.22
 4 7 -4 9.86 1
 -4 -7 3 34.95 3.54
 4 -7 -3 50.27 6.05
 4 7 -3 49.7 4.79
 -4 -7 3 45.03 5.63
 -4 7 3 43.78 5.86
 -4 7 2 -1.26 1.76
 -4 -7 2 -1.57 1.07
 4 -7 -2 0.29 0.82
 4 -7 -2 1.14 0.89
 4 7 -2 0.81 0.6
 -4 -7 2 0.16 0.24
 -4 7 1 -1.49 1.12
 4 -7 -1 -0.29 0.84
 4 -7 -1 0.29 0.77
 -4 -7 1 0.78 1.21
 -4 7 1 -0.29 0.84
 -4 -7 1 -0.63 0.89
 4 7 -1 -0.09 0.31
 -4 7 0 22.63 4.04
 -4 7 0 24.84 3
 -4 -7 0 23.17 4.21
 -4 -7 0 10.18 1.49
 -4 -7 0 20.42 2.9
 -4 -7 -1 2.26 0.9
 -4 7 -1 3.1 1.1
 -4 -7 -1 3.49 1.67
 -4 -7 -2 0.27 0.96
 -4 7 -2 -0.59 0.74
 -4 7 -2 2.15 0.99
 -4 -7 -2 3.01 2.55
 -4 7 -3 7.77 2.66
 -4 -7 -3 10.14 2.7
 -4 7 -3 7.92 2.09
 -4 -7 -3 4.63 2.41
 -4 -7 -4 21.62 4.58
 -4 7 -4 15.35 3.53
 -4 7 -4 17.25 3.18
 -4 -7 -4 20.03 3.84
 -4 7 -5 40.16 5.22
 -4 -7 -5 46.3 6.35
 -4 7 -6 35.82 5.14
 -4 -7 -6 36.65 5.74
 -4 -7 -7 31.79 5.87
 -4 7 -7 25.67 4.85
 -4 7 -8 44.5 6.66
 -4 -7 -8 50.93 7.52
 -4 7 -9 10.72 3.46
 4 7 9 11.28 3.29
 -4 -7 -9 13.47 4.13
 4 -7 9 10.61 3.56
 4 -7 10 3.48 2.24
 4 7 10 1.86 1.71
 -4 7 -10 0.17 1.19
 -4 -7 -10 0.98 1.13
 -4 7 -11 1.54 1.69
 -4 -7 -11 -0.99 1.3
 4 7 11 0.91 1.25
 -4 7 -12 -2.76 2.19
 4 7 12 -1.36 1.06
 4 -7 12 -1.06 1.71
 -4 -7 -12 0 0.93
 4 -7 13 0.8 1.59
 -4 -7 -13 1.78 2.03
 -4 7 -13 0.36 1.02
 4 7 13 2.51 2.09
 4 -8 -13 -2.32 2.15
 4 -8 -12 -5.99 3.22
 4 -8 -11 9.32 3.93
 4 -8 -10 1.39 0.83
 4 -8 -9 17.59 4.67
 -4 -8 8 4.36 1.88
 4 -8 -8 1.7 1.6
 -4 -8 7 49.43 6.01
 4 -8 -7 49.26 7.49
 -4 8 7 49.14 7.24
 4 -8 -6 25.01 5.36
 -4 -8 6 24.35 4.18
 4 8 -6 26.62 2.99
 -4 8 6 22.27 4.94
 4 8 -5 2.04 0.61
 -4 -8 5 2.54 1.5
 4 -8 -5 3.96 2.16
 -4 8 5 -0.04 1.94
 -4 8 4 26.08 5.16
 -4 -8 4 26.28 4.52
 4 -8 -4 26.59 4.94
 4 8 -4 23.53 1.55
 -4 8 3 7.02 2.84
 -4 -8 3 7.4 2.4
 4 -8 -3 8.29 2.14
 4 8 -3 8.52 2.15
 -4 -8 3 5.2 1.24
 4 -8 -3 6.18 2.05
 4 -8 -2 117.75 7.38
 4 8 -2 114.08 6.7
 4 -8 -2 114.16 8.67
 -4 -8 2 89.47 5.55
 -4 8 2 110.51 9.43
 -4 -8 2 109.25 9.47
 -4 -8 1 1.61 1.63
 -4 8 1 -2.07 1.98
 -4 8 1 0.69 0.35
 -4 -8 1 0.11 0.65
 4 -8 -1 -0.82 1.17
 -4 8 0 10.61 2.67
 -4 -8 0 6.49 1.3
 -4 -8 0 14.7 2.6
 -4 8 0 15.65 2.41
 -4 -8 0 15.75 3.7
 -4 -8 -1 149.19 11.59
 -4 -8 -1 130.29 7.19
 -4 8 -1 138.78 10.49
 -4 -8 -2 34.65 5.66
 -4 8 -2 34.33 5.13
 -4 -8 -3 53.26 6.81
 -4 8 -3 59.18 5.32
 -4 -8 -3 65.46 6.42
 -4 8 -3 49.81 6.35
 -4 -8 -4 128.95 11.12
 -4 8 -4 119.4 10.24
 -4 8 -4 133.32 8.56
 -4 -8 -4 142.18 10.07
 -4 8 -5 -1.42 1.98
 -4 8 -5 0.22 1.04
 -4 -8 -5 -1.3 1.57
 -4 -8 -6 47.6 6.21
 -4 8 -6 49.56 7.03
 -4 8 -6 45.51 5.71
 -4 8 -7 37.41 5.56
 -4 -8 -7 48.19 6.72
 4 -8 8 2.79 2.34
 -4 8 -8 -0.86 1.77
 -4 -8 -8 2.25 2.42
 4 -8 9 -1.43 1.9
 -4 -8 -9 2.62 1.98
 -4 8 -9 0.31 1.25
 4 8 9 -1.49 1.95
 -4 -8 -10 22.64 5.43
 -4 8 -10 14.78 4.24
 4 8 10 29.01 5.89
 4 -8 10 11.37 3.97
 -4 -8 -11 5.67 3.34
 -4 8 -11 2.76 1.96
 4 8 11 6.4 2.89
 4 -8 11 1.03 1.31
 -4 -8 -12 -1.65 1.75
 -4 8 -12 0.85 1.33
 4 8 12 -0.36 1.4
 4 -8 12 3.52 2.41
 -4 8 -13 8.96 4.33
 -4 -8 -13 5.83 3.87
 4 8 13 23.21 6.51
 4 -8 13 13.92 5.39
 4 -9 -12 3.29 2.26
 4 -9 -11 -5.51 3.06
 4 -9 -10 0.02 1.7
 4 -9 -9 0.13 1.16
 -4 -9 8 65.95 7.17
 4 -9 -8 50.7 7.51
 -4 9 7 15.45 4.5
 -4 -9 7 16.91 3.89
 4 -9 -7 15.5 3.54
 -4 -9 6 10.72 3.1
 4 -9 -6 15.4 4.27
 -4 9 6 9.9 3.31
 -4 -9 5 30.29 4.9
 4 -9 -5 29.2 5.01
 -4 9 5 32.61 6.03
 -4 9 4 36.24 5.96
 -4 -9 4 47.71 6.42
 4 -9 -4 44.03 6.14
 -4 9 3 26.54 4.66
 -4 -9 3 34.83 5.72
 4 -9 -3 41.08 4.79
 4 9 -3 33.6 3.81
 4 -9 -3 34.22 5.46
 -4 -9 2 61.22 7.5
 4 -9 -2 64.36 5.75
 4 9 -2 55.34 4.71
 4 -9 -2 57.59 6.52
 -4 9 2 50.11 6.47
 -4 9 1 15.65 3.55
 -4 -9 1 17.16 4.01
 4 -9 -1 18.59 3.78
 -4 -9 0 9.05 2.06
 -4 9 0 7.36 2.66
 -4 -9 0 5.19 1.31
 -4 9 0 9.01 1.73
 -4 -9 0 6.28 2.09
 -4 -9 -1 -0.46 0.82
 -4 9 -1 -0.85 0.66
 -4 -9 -1 -0.48 1.22
 -4 9 -1 0.46 0.37
 -4 -9 -2 27.15 5.23
 -4 9 -2 22.54 4.27
 -4 9 -3 0.62 0.86
 -4 -9 -3 -0.63 1.33
 -4 9 -3 -0.63 1.46
 -4 -9 -3 0.18 1.65
 -4 9 -4 7.23 2.58
 -4 -9 -4 11.17 3.19
 -4 9 -4 7.06 1.91
 -4 -9 -4 6.86 2.93
 -4 -9 -5 93.33 10.34
 -4 9 -5 90.62 9.52
 -4 9 -5 98.43 8.03
 -4 -9 -5 107.33 9.76
 -4 9 -6 2.86 1.14
 -4 9 -6 2.58 2.27
 -4 -9 -6 5.02 2.34
 -4 9 -7 10.51 3.08
 -4 -9 -7 11.36 3.37
 -4 9 -7 3.59 1.64
 -4 9 -8 5.74 2.41
 -4 -9 -8 5.08 2.29
 4 9 8 4.84 2.42
 4 -9 8 4.55 2.52
 4 9 9 -0.04 1.27
 -4 9 -9 -0.42 1.83
 -4 -9 -9 4.65 2.51
 4 -9 9 1.96 1.6
 -4 9 -10 -0.68 1.14
 -4 -9 -10 -1.05 0.85
 4 9 10 -1.92 1.86
 4 -9 10 0.78 1.81
 -4 9 -11 0.73 1.31
 -4 -9 -11 -0.34 1.14
 4 9 11 3.17 2.15
 4 -9 11 0.63 1.3
 -4 -9 -12 -1.76 1.84
 -4 9 -12 1.14 1.62
 4 9 12 -0.29 1.16
 4 -9 12 -3.72 2.88
 -4 9 -13 0.39 1.73
 -4 -9 -13 0.48 1.87
 4 9 13 2.69 2.42
 4 -9 13 2.81 2.49
 4 -10 -12 2.17 2.29
 4 -10 -11 1.15 2.07
 4 -10 -10 10.87 3.99
 4 -10 -9 9.1 3.44
 -4 -10 8 22.47 4.51
 4 -10 -8 23.63 5.66
 -4 -10 7 -0.77 1.22
 4 -10 -7 -0.34 1.45
 -4 10 7 -2.89 2.54
 -4 -10 6 1.44 1.45
 4 -10 -6 1.52 0.88
 -4 10 6 1.12 1.03
 -4 -10 5 0.67 1.1
 4 -10 -5 0.23 0.94
 -4 10 5 0.82 2.12
 -4 10 4 39.62 6.7
 -4 -10 4 45.52 6.47
 4 10 -4 45.41 4.76
 4 -10 -4 46.53 5.26
 4 -10 -4 45.36 6.42
 -4 -10 3 57.89 7.48
 4 -10 -3 72.87 6.09
 4 10 -3 57.76 4.88
 4 -10 -3 55.55 6.61
 -4 10 3 52.99 7.2
 -4 -10 2 5.75 2.9
 4 -10 -2 5.25 2.37
 -4 10 2 1.93 0.84
 -4 10 1 7.56 2.44
 -4 -10 1 7.89 2.89
 4 -10 -1 7.42 2.22
 -4 10 0 22.53 4.82
 -4 10 0 26.56 2.89
 -4 -10 0 27.55 3.23
 -4 -10 0 24.83 4.86
 -4 -10 -1 169.44 13.22
 -4 10 -1 171.31 7.66
 -4 -10 -1 187.6 9.26
 -4 10 -1 154.3 11.98
 -4 -10 -2 5.02 1.95
 -4 10 -2 5.83 2.21
 -4 10 -3 14.06 3.74
 -4 -10 -3 11.47 3.73
 -4 10 -4 42.19 6.41
 -4 -10 -4 40.47 7.01
 -4 10 -4 42.16 4.72
 -4 -10 -4 46.11 5.79
 -4 10 -5 8.44 2.63
 -4 10 -5 16.18 3.15
 -4 -10 -5 11.47 3.78
 -4 -10 -6 -1.14 0.67
 -4 10 -6 -0.75 1.45
 -4 10 -6 0.42 0.58
 -4 -10 -6 -1.72 2.44
 4 -10 7 5.05 2.43
 -4 10 -7 6.45 2.81
 4 10 7 6.65 2.34
 -4 10 -7 4.52 1.74
 -4 -10 -7 4.09 1.94
 -4 10 -8 -0.61 1.14
 -4 -10 -8 -0.01 0.97
 -4 10 -8 -0.48 1.05
 4 -10 8 1.66 1.53
 4 10 8 -1.17 1.78
 -4 10 -9 1.07 0.93
 -4 -10 -9 0.93 0.59
 -4 10 -9 1.13 0.97
 4 10 9 0.54 0.73
 4 -10 9 -0.16 1.08
 4 -10 10 5.37 2.88
 -4 -10 -10 6.97 3.22
 4 10 10 8.67 3.28
 4 10 11 3.41 2.21
 4 -11 -11 0.93 1.35
 4 -11 -10 0 1.89
 4 -11 -9 3.65 2.48
 -4 -11 8 -0.39 1.5
 4 -11 -8 0.13 0.69
 -4 -11 7 3.04 1.77
 4 -11 -7 7.85 3.73
 -4 11 7 2.09 2.61
 -4 -11 6 2.1 0.73
 4 -11 -6 2.45 1.79
 -4 11 6 1.53 0.99
 4 -11 -5 -0.15 1.51
 -4 -11 5 3.85 2.34
 -4 11 5 0.58 1.29
 -4 11 4 21.64 4.97
 -4 -11 4 28.87 5.48
 4 -11 -4 21.58 4.43
 -4 11 3 25.65 5.19
 -4 -11 3 28.64 5.92
 4 -11 -3 24.73 4.93
 -4 11 2 0.07 0.73
 -4 -11 2 3.7 1.85
 4 -11 -2 3.29 1.89
 -4 11 1 0.48 0.96
 4 -11 -1 -1.22 1.61
 -4 -11 1 1.08 1.93
 -4 11 0 2.09 1.88
 -4 -11 0 5.43 2.73
 -4 11 -1 7.93 2.87
 -4 -11 -1 12.55 3.66
 -4 11 -2 31.81 5.61
 -4 -11 -2 32.56 6.22
 -4 -11 -3 19.15 5.08
 -4 11 -3 17.87 4.37
 -4 11 -4 3.23 1.92
 -4 -11 -4 1.91 1.77
 -4 11 -5 5.72 2.5
 -4 -11 -5 4.68 2.41
 -4 11 -6 2.38 1.33
 -4 -11 -6 4.43 2.3
 -4 11 -7 1.39 0.83
 -4 11 -8 -0.72 1.38
 -4 11 -9 2.1 2.2
 -4 11 -10 0.88 1.86
 -4 11 -11 -0.29 0.89
 -4 11 -12 -3.44 2.6
 4 -12 -11 4.84 3.75
 4 -12 -10 -3.2 2.4
 4 -12 -9 -0.36 0.93
 -4 -12 8 1.29 0.95
 4 -12 -8 4.69 2.94
 -4 -12 7 2.35 2.23
 4 -12 -7 0.75 1.41
 -4 12 7 -1.18 1.59
 4 -12 -6 1.88 0.75
 -4 12 6 1.01 0.85
 4 -12 -5 1.3 1.52
 -4 -12 5 3.92 2.5
 -4 12 5 4.3 2.06
 -4 12 4 -0.63 1.46
 -4 -12 4 1.14 1.3
 4 -12 -4 2.81 1.41
 -4 12 3 27.7 5.6
 4 -12 -3 27.83 5.33
 -4 -12 3 28.51 5.9
 -4 12 2 10.04 3.21
 -4 -12 2 11.6 3.76
 4 -12 -2 10.93 2.81
 -4 12 1 20.4 4.54
 4 -12 -1 32.62 5.22
 -4 -12 1 27.02 5.82
 -4 12 0 -0.03 0.91
 -4 -12 0 0.76 1.15
 -4 12 -1 34.19 6.02
 -4 -12 -1 40.38 7.11
 -4 12 -2 16.66 4.17
 -4 -12 -2 18.05 4.66
 -4 12 -3 17.2 4.32
 -4 -12 -3 19.12 4.97
 -4 12 -4 -0.02 1.11
 -4 -12 -4 0.84 1.28
 -4 12 -5 0.04 0.99
 -4 -12 -5 -2.6 2.6
 -4 12 -6 0.82 1.12
 -4 -12 -6 0.19 1.77
 -4 12 -7 1.12 1.39
 -4 12 -8 3.51 1.83
 -4 12 -9 0.63 1.04
 -4 12 -10 0.25 1.4
 -4 12 -11 -0.47 1.11
 4 -13 -10 -3.61 2.6
 4 -13 -9 -3.37 2.41
 -4 -13 8 -0.92 1.93
 4 -13 -8 0.58 1.17
 -4 -13 7 1.61 1.92
 4 -13 -7 -4.27 2.95
 -4 13 7 -0.4 1.33
 4 -13 -6 1.79 1.54
 -4 -13 6 2.75 1.56
 -4 13 6 1.94 1.86
 -4 -13 5 0.08 0.87
 4 -13 -5 -1.04 1.82
 -4 13 5 2.3 1.96
 -4 13 4 -0.8 1.18
 -4 -13 4 -1.31 2.23
 4 -13 -4 -0.33 1.31
 -4 13 3 20.4 4.95
 -4 -13 3 19.39 5.06
 4 -13 -3 23.94 4.8
 -4 13 2 6.57 2.66
 -4 -13 2 8.79 3.32
 -4 -13 1 47.56 7.98
 -4 13 1 36.28 6.24
 -4 13 0 0.41 1.44
 -4 -13 0 -0.19 1.33
 -4 13 -1 -0.16 0.74
 -4 -13 -1 0.28 1.82
 -4 13 -2 1.07 1.18
 -4 -13 -2 0.15 1.36
 -4 13 -3 0.51 1.39
 -4 -13 -3 -0.26 1.09
 -4 13 -4 8.34 3.24
 -4 -13 -4 13.22 4.14
 -4 13 -5 1.17 1.48
 -4 -13 -5 2.67 2.04
 -4 -13 -6 1.62 1.76
 -4 13 -6 1.34 1.42
 -4 13 -7 1.03 0.73
 -4 -13 -7 5.44 3.08
 -4 13 -8 0.09 0.79
 -4 13 -9 4.64 2.9
 -4 13 -10 -0.3 0.88
 4 -14 -10 -1.6 1.79
 4 -14 -9 -1.7 1.81
 4 -14 -8 1.43 1.17
 -4 -14 7 -0.36 1.04
 4 -14 -7 -7.49 3.64
 -4 -14 6 4.13 2.53
 4 -14 -6 2.04 1.64
 -4 14 6 2.36 1.51
 -4 -14 5 2.13 2.21
 4 -14 -5 -0.2 0.92
 -4 14 5 -1.5 1.96
 -4 -14 4 6.51 3.09
 -4 14 4 3.97 2.31
 -4 14 3 1.28 1.54
 -4 -14 3 -0.13 2.31
 -4 14 2 -0.13 0.59
 -4 -14 2 0.98 1.43
 -4 14 1 -1.09 1.75
 -4 -14 1 2.6 2.47
 -4 14 0 1.12 1.68
 -4 -14 0 0.92 1.44
 -4 14 -1 3.75 2.02
 -4 -14 -1 5.06 2.98
 -4 14 -2 3.93 2.52
 -4 -14 -2 -4.01 2.96
 -4 14 -3 5.96 2.3
 -4 -14 -3 17.13 5.13
 -4 14 -4 0.93 1.21
 -4 -14 -4 2.55 2.29
 -4 -14 -5 0.95 1.47
 -4 14 -5 1.21 1.5
 -4 14 -6 2.23 2.05
 -4 -14 -6 1.87 2.25
 -4 14 -7 -0.04 1.24
 -4 -14 -7 -1.96 1.6
 -4 14 -8 0.23 1.09
 -4 14 -9 3.26 2.92
 -4 14 -10 0.48 0.99
 4 -15 -9 0.2 1.19
 4 -15 -8 2.22 2.23
 -4 -15 7 -1.9 2.14
 -4 -15 6 -2.36 2.02
 -4 15 6 -5.65 3.3
 -4 -15 5 1.77 2.19
 -4 15 5 -0.6 1.03
 -4 -15 4 4.57 3.26
 -4 15 4 0.76 1.32
 -4 15 3 -1.3 1.49
 -4 -15 3 2.65 2.53
 -4 15 2 0.22 0.45
 -4 -15 2 5.6 2.81
 -4 15 1 0.99 0.83
 -4 -15 1 4.17 2.43
 -4 15 0 -1.45 1.44
 -4 -15 0 0.98 0.85
 -4 15 -1 -2.21 1.65
 -4 -15 -1 1.52 1.51
 -4 15 -2 -0.29 0.56
 -4 -15 -2 1.78 1.56
 -4 15 -3 1.59 1.6
 -4 -15 -3 6.21 3.2
 -4 15 -4 0.34 0.61
 -4 -15 -4 0.24 1.42
 -4 15 -5 -0.04 0.59
 -4 -15 -5 -3.42 2.51
 -4 15 -6 -1.42 1.86
 -4 -15 -6 2.41 2.03
 -4 -15 -7 1.23 1.55
 -4 15 -7 1.39 1.67
 -4 15 -8 0.18 0.74
 -4 -16 7 -1.44 2.13
 -4 -16 6 2.66 1.76
 -4 16 6 0.58 1.1
 -4 -16 5 2.28 2.43
 -4 16 5 0 0.91
 -4 -16 4 0.41 1.14
 -4 16 4 -0.39 0.87
 -4 -16 3 8.77 3.84
 -4 16 3 3.33 2.72
 -4 -16 2 2.44 2.05
 -4 16 2 -0.24 1.73
 -4 16 1 0.95 1.39
 -4 -16 1 0.92 1.64
 -4 16 0 0.96 1.17
 -4 -16 0 5.34 3.07
 -4 16 -1 0.58 0.91
 -4 -16 -1 0.72 0.95
 -4 16 -2 3.06 2.28
 -4 -16 -2 6.97 3.98
 -4 16 -3 -0.12 0.6
 -4 -16 -3 0.17 0.72
 -4 16 -4 -1.75 1.99
 -4 -16 -4 3.17 3.25
 -4 16 -5 0.13 0.7
 -4 -16 -5 -5.04 3.09
 -4 16 -6 0.73 1.53
 -4 17 4 0 1.29
 -4 -17 3 -2.64 2.33
 -4 17 3 0 0.81
 -4 17 2 4.65 3.03
 -4 -17 2 11.46 4.73
 -4 17 1 -1.09 1.6
 -4 -17 1 -3.89 2.8
 -4 17 0 2.99 2.32
 -4 -17 0 2.92 3.13
 -4 17 -1 -1.54 1.8
 -4 17 -2 -0.66 1.25
 -4 17 -3 -0.42 1.09
 -4 17 -4 0.27 1.37
 -4 18 2 -0.1 0.53
 -4 18 1 -0.2 0.51
 -4 18 0 0.84 1.58
 -4 18 -1 0.72 1.56
 5 0 -15 1.68 1.46
 5 0 -14 3.38 2.18
 5 0 -13 37.44 7.49
 5 0 -12 1.81 2
 5 0 -11 31.79 6.69
 5 0 -10 -0.28 1.33
 5 0 -9 71.26 8.7
 5 0 -8 -0.75 2.38
 5 0 -7 13.36 1.85
 5 0 -7 23.83 4.61
 5 0 -6 -0.14 1.83
 5 0 -6 -0.02 0.18
 5 0 -5 459.12 17.82
 5 0 -4 -0.75 1.26
 -5 0 4 0.95 0.66
 -5 0 3 22.41 3
 -5 0 3 21.32 3.31
 5 0 -3 19.38 3.18
 -5 0 2 -0.36 0.58
 5 0 -2 0.35 0.81
 -5 0 2 -0.85 1.03
 -5 0 1 17.88 3.07
 -5 0 1 18.64 2.59
 5 0 -1 16.58 2.82
 -5 0 0 0.02 0.52
 5 0 0 -2.99 1.9
 -5 0 -1 66.37 6.09
 -5 0 -2 3.37 2.34
 -5 0 -3 146.16 10.08
 -5 0 -4 -2.21 2.06
 -5 0 -5 390.41 17.89
 -5 0 -6 0.75 1.62
 -5 0 -7 402.12 20.28
 -5 0 -8 -2.35 2.12
 -5 0 -9 9.26 3.36
 -5 0 -10 0.56 0.83
 -5 0 -11 15.51 4.35
 -5 0 -12 -2.39 2.34
 5 0 12 2.76 2.34
 -5 0 -13 5.88 3.53
 5 0 13 -3.34 3.41
 5 0 14 4.19 3.22
 -5 0 -14 0.62 1.01
 5 -1 -15 1.09 2.05
 5 1 -15 -2.86 2.66
 5 1 -14 -0.28 1.38
 5 -1 -14 2.62 1.82
 5 -1 -13 8.28 3.53
 5 1 -13 5.11 2.67
 5 -1 -12 9.81 3.82
 5 1 -12 14.02 4.48
 5 -1 -11 3.38 2.16
 5 1 -11 6.41 3.13
 5 -1 -10 86.53 10.43
 5 1 -10 92.65 10.26
 5 -1 -9 13.28 3.74
 5 1 -9 11.79 3.4
 5 -1 -8 8.05 2.73
 5 1 -8 9.11 2.77
 5 -1 -7 67.39 7.58
 5 1 -7 66.23 7.48
 5 -1 -6 160.14 11.25
 5 1 -6 159.67 10.78
 5 1 -5 -0.93 1.38
 5 -1 -5 0.7 1.57
 -5 1 5 2.15 0.56
 5 1 -4 292.42 13.12
 5 -1 -4 299.89 14.2
 -5 -1 4 275.35 10.74
 -5 1 4 316.54 13.27
 -5 1 3 216.98 11.55
 -5 -1 3 227.97 11.87
 5 -1 -3 224.07 11.7
 5 1 -3 216.94 11.01
 -5 -1 3 208.35 8.9
 -5 1 3 214.76 9.92
 5 1 -3 227.52 8.72
 -5 1 2 52.57 5.54
 -5 -1 2 56.35 5.88
 5 -1 -2 49.87 5.27
 5 1 -2 49.09 5.4
 5 -1 -2 57.5 5.9
 -5 -1 2 48.34 3.65
 -5 1 2 49.39 4.71
 5 1 -2 54.87 4.07
 -5 1 1 19.73 2.92
 -5 -1 1 18.59 2.27
 -5 -1 1 18.53 2.95
 5 -1 -1 21.7 3.58
 -5 1 1 21.8 3.44
 5 1 -1 16.79 2.83
 5 -1 0 267.63 11.97
 5 1 0 231.79 11.41
 -5 1 0 236.5 9.92
 -5 -1 0 249.01 9.07
 -5 1 -1 173.01 9.6
 -5 -1 -1 159.55 9.49
 -5 1 -1 150.8 8.36
 -5 1 -2 42.02 5.21
 -5 -1 -2 44.38 5.57
 -5 1 -3 1170.09 27.97
 -5 -1 -3 1195.59 28.9
 -5 1 -4 1.44 0.97
 -5 -1 -4 0.28 0.99
 -5 1 -5 120.85 9.87
 -5 -1 -5 123.44 10.24
 -5 1 -6 26.5 4.9
 -5 -1 -6 24.58 4.69
 -5 1 -7 68.4 8.35
 -5 -1 -7 76.33 8.9
 -5 1 -8 -0.98 1.59
 -5 -1 -8 2.13 1.41
 -5 1 -9 6.05 2.89
 -5 -1 -9 4.18 2.01
 -5 -1 -10 2.13 2.33
 -5 1 -10 1.24 1.18
 -5 -1 -11 7.34 3.41
 -5 1 -11 3.32 2.02
 5 1 12 -1.93 2.24
 5 -1 12 -1.06 1.81
 -5 -1 -12 3.84 2.71
 -5 1 -12 -0.18 1.8
 -5 -1 -13 2.59 1.86
 -5 1 -13 2.53 2.24
 5 1 13 1.55 1.08
 5 -1 13 3.96 2.95
 5 -1 14 1.12 1.73
 5 2 -15 4.46 3.15
 5 -2 -14 2.01 1.1
 5 2 -14 2.36 2.4
 5 -2 -13 -0.26 2.24
 5 2 -13 0.9 2.04
 5 -2 -12 7.45 3.24
 5 2 -12 4.27 2.74
 5 -2 -11 0.42 1.81
 5 2 -11 -0.16 1.36
 5 2 -10 33.4 5.94
 5 -2 -10 34.27 6.61
 5 -2 -9 11.04 3.82
 5 2 -9 9.42 3.28
 5 -2 -8 11.04 3.73
 5 2 -8 8.75 2.96
 5 -2 -7 8.84 2.85
 5 2 -7 7.6 2.53
 5 2 -6 19.53 3.64
 5 -2 -6 12.69 3.14
 5 -2 -5 159.96 11.01
 5 2 -5 176.56 10.28
 -5 2 5 169.67 10.65
 5 2 -4 975.91 23.99
 5 -2 -4 1018.13 26.63
 -5 2 4 1019.42 25.14
 5 2 -4 979.5 17.89
 -5 2 3 83.08 7.07
 -5 -2 3 85.05 7.53
 5 -2 -3 91.18 7.49
 -5 -2 3 74.96 4.61
 -5 2 3 84.83 6.64
 5 2 -3 82.8 4.56
 -5 2 2 116.15 8.14
 -5 -2 2 127.27 8.78
 -5 2 2 112.47 7.58
 5 -2 -2 122.57 8.36
 5 2 -2 122.07 8.3
 5 -2 -2 123.18 8.66
 -5 -2 2 103.61 5.03
 5 2 -2 123.01 5.34
 -5 2 1 392.26 14.16
 -5 -2 1 399.02 14.56
 -5 2 1 412.51 14.05
 5 -2 -1 416.65 14.94
 5 2 -1 377.56 14.1
 -5 -2 1 355.73 9.64
 5 -2 0 115.08 8.07
 5 2 0 118.25 7.8
 -5 2 0 114.99 7.59
 -5 -2 0 100.85 5.17
 -5 2 -1 -4.3 1.71
 -5 2 -2 652.54 19.93
 -5 -2 -2 692.52 21.29
 -5 2 -3 311.22 14.24
 -5 -2 -3 338.61 15.3
 -5 2 -4 130.2 9.71
 -5 -2 -4 133.08 10.01
 -5 2 -5 1.48 1.17
 -5 -2 -5 -0.29 1.52
 -5 2 -6 0.75 1.03
 -5 -2 -6 -1.16 1.58
 -5 2 -7 82.16 9.13
 -5 -2 -7 79.51 9.09
 -5 -2 -8 8.9 3.24
 -5 2 -8 8.71 2.94
 -5 2 -9 -0.54 1.54
 -5 -2 -9 -0.54 1.45
 -5 -2 -10 13.44 4.38
 -5 2 -10 11.52 3.9
 -5 -2 -11 1.96 1.61
 -5 2 -11 1.51 1.25
 5 2 12 9.16 3.98
 -5 -2 -12 3.09 1.91
 -5 2 -12 2.09 1.6
 5 -2 12 3.53 2.9
 5 2 13 1.56 1.32
 5 -2 13 1.22 1.69
 -5 2 -13 0.5 1.41
 -5 -2 -13 0.75 1.56
 5 3 -14 7.81 3.54
 5 -3 -14 3.11 2.38
 5 -3 -13 12.54 4.43
 5 3 -13 13.9 4.46
 5 -3 -12 3.75 2.31
 5 3 -12 4.66 2.13
 5 3 -11 10.77 3.47
 5 -3 -11 9.4 3.41
 5 3 -10 8.05 2.95
 5 -3 -10 6.95 2.53
 5 -3 -9 4.96 2.95
 5 3 -9 0.8 1.08
 5 3 -8 49.44 6.28
 5 -3 -8 44.26 6.86
 5 3 -7 148.57 10.57
 5 -3 -7 137.52 11.63
 5 3 -6 14.84 3.32
 5 -3 -6 13.12 3.17
 -5 3 6 11.9 2.97
 5 3 -5 0.55 0.67
 -5 3 5 -0.43 0.66
 5 -3 -4 203.5 12.4
 5 3 -4 221.64 10.9
 -5 3 4 217.87 12.12
 5 3 -4 200.23 7.14
 -5 3 3 25.82 3.93
 -5 3 3 26.21 3.91
 -5 -3 3 24.06 3.95
 5 -3 -3 33.08 5.01
 5 3 -3 25.72 2.15
 -5 3 2 89.08 7.19
 -5 -3 2 91.67 7.33
 5 -3 -2 94.85 7.41
 5 3 -2 83.57 6.84
 5 -3 -2 91.47 7.57
 -5 -3 2 76.65 3.55
 -5 3 2 87.23 7.11
 -5 3 1 94.53 6.64
 -5 -3 1 105.91 7.52
 5 -3 -1 97.75 7.21
 5 3 -1 95.66 7.14
 -5 -3 1 80.96 3.74
 -5 3 1 95.19 7.16
 -5 3 0 33.57 4.07
 -5 3 -1 100.94 7.53
 -5 -3 -2 79.22 7.31
 -5 3 -2 71.25 6.57
 -5 3 -2 69.14 6.43
 -5 3 -3 719.73 21.54
 -5 -3 -3 765.53 23.21
 -5 3 -4 62.86 6.61
 -5 -3 -4 66.85 7.16
 -5 3 -5 92.94 8.48
 -5 -3 -5 94.33 9.02
 -5 3 -6 75.62 8.12
 -5 -3 -6 85.07 8.8
 -5 3 -7 216.19 14.81
 -5 -3 -7 231.45 15.86
 -5 3 -8 2.16 1.5
 -5 -3 -8 5.45 2.46
 -5 3 -9 19.38 4.68
 -5 -3 -9 20.78 5.04
 -5 3 -10 9.88 3.7
 -5 -3 -10 13.09 4.39
 -5 -3 -11 2.15 2.63
 -5 3 -11 -0.6 1.87
 -5 -3 -12 -0.09 1.33
 5 3 12 4.09 2.95
 5 -3 12 6.46 3.48
 -5 3 -12 2.29 2.49
 5 -3 13 9.66 4.94
 5 3 13 7.21 3.22
 -5 -3 -13 0.77 1.66
 -5 3 -13 1.35 0.78
 5 -4 -14 -3.46 2.77
 5 -4 -13 2.49 2.63
 5 4 -13 5.07 2.79
 5 -4 -12 12.82 4.35
 5 4 -12 6.49 2.87
 5 -4 -11 2.47 2.07
 5 4 -11 4.53 2.83
 5 -4 -10 -3.31 2.14
 5 4 -10 0.56 1.59
 5 4 -9 65.71 7.39
 5 -4 -9 55.71 8.38
 5 4 -8 3.64 1.68
 5 -4 -8 0.87 1.92
 5 -4 -7 3.07 0.99
 5 4 -7 3.72 1.91
 5 4 -6 -0.01 0.69
 5 -4 -6 -3.37 2.49
 -5 4 6 -1.63 1.36
 5 4 -5 0.65 0.31
 5 4 -5 1.47 0.96
 5 -4 -5 0.77 0.94
 -5 4 5 -0.08 1.36
 -5 4 4 6.74 1.97
 5 -4 -4 12.19 3.19
 5 4 -4 8.7 1.3
 -5 4 3 14.3 3.02
 -5 4 3 15.12 3.1
 -5 -4 3 14.08 3.03
 5 -4 -3 12.1 2.96
 -5 4 2 136.9 9.39
 -5 4 2 138.82 8.71
 -5 -4 2 139.78 9.28
 5 -4 -2 144.21 9.39
 5 4 -2 142.3 8.69
 5 -4 -2 152.03 9.92
 -5 4 1 548.95 16.88
 -5 -4 1 585.43 18.13
 5 -4 -1 573.15 17.9
 5 4 -1 543.64 16.86
 -5 4 1 540.93 18.15
 -5 4 0 1.02 0.69
 -5 4 -1 0.19 1.22
 -5 4 -2 110.65 7.93
 -5 -4 -2 127.18 9.03
 -5 4 -2 106.89 8.43
 -5 4 -3 3.99 1.74
 -5 -4 -3 2.06 0.92
 -5 4 -4 9.14 2.63
 -5 -4 -4 6.49 2.09
 -5 4 -5 187.97 12.27
 -5 -4 -5 205.44 13.42
 -5 4 -6 6.87 2.38
 -5 -4 -6 5.72 2.58
 -5 4 -7 1.91 1.6
 -5 -4 -7 -0.89 1.99
 -5 4 -8 10.71 3.57
 -5 -4 -8 5.41 2.5
 -5 -4 -9 -0.1 0.93
 -5 4 -9 1.94 2.17
 -5 4 -10 10.98 3.66
 -5 -4 -10 11.48 3.83
 5 -4 11 8.88 3.53
 -5 4 -11 10.28 4.05
 -5 -4 -11 7.47 3.31
 5 -4 12 -1.29 1.28
 5 4 12 -2.37 2.28
 -5 4 -12 2.05 2.19
 -5 -4 -12 -0.62 1.18
 -5 4 -13 2.82 2.55
 -5 -4 -13 5.3 3.58
 5 4 13 0.94 2.27
 5 -4 13 4.37 3.05
 5 -5 -13 8.25 3.83
 5 -5 -12 -0.87 1.1
 5 5 -11 3.86 2.02
 5 -5 -11 1.38 1.78
 5 5 -10 7.88 2.86
 5 -5 -10 8.83 3.55
 5 5 -9 13.34 3.46
 5 -5 -9 7.8 3.43
 5 5 -8 56.33 6.39
 5 -5 -8 62.21 8.52
 5 5 -7 46.57 5.6
 5 -5 -7 41.65 6.84
 -5 5 7 37.96 6.38
 5 5 -6 10.66 1.87
 5 -5 -6 9.55 3.03
 5 5 -6 12.21 2.85
 -5 5 6 11.06 3.32
 5 -5 -5 95.38 8.98
 -5 5 5 94.07 9.09
 5 -5 -4 336.39 16.37
 -5 5 4 337.09 16.22
 5 5 -4 312.64 5.28
 -5 5 3 2.82 1.32
 -5 5 3 4.15 1.59
 -5 -5 3 4.09 1.44
 5 -5 -3 3.24 1.67
 -5 5 2 8.57 2.3
 -5 5 2 9.55 2.49
 -5 -5 2 12.67 3.08
 5 -5 -2 11.02 2.58
 5 5 -2 9.84 2.42
 5 -5 -2 13.89 3.11
 -5 5 1 1.49 1.14
 5 -5 -1 4.45 1.74
 5 5 -1 4.78 1.86
 -5 5 1 2.76 1.22
 -5 -5 1 3.46 1.57
 5 -5 -1 1.73 1.71
 -5 5 0 187.3 9.53
 -5 5 0 195.1 11.27
 -5 5 -1 -1.25 2.04
 -5 5 -2 6.77 1.93
 -5 -5 -2 9.03 2.21
 -5 5 -2 4.28 1.46
 -5 5 -3 22.6 3.99
 -5 5 -3 19.14 3.46
 -5 -5 -3 18.92 3.72
 -5 5 -4 116.28 9.15
 -5 -5 -4 136.59 10.56
 -5 5 -5 38.76 5.52
 -5 -5 -5 38.93 5.82
 -5 5 -6 57.51 7.01
 -5 -5 -6 60.81 7.63
 -5 5 -7 40.74 6.18
 -5 -5 -7 40.75 6.69
 -5 5 -8 5.92 2.4
 -5 -5 -8 10.04 3.47
 -5 5 -9 18.53 4.86
 -5 -5 -9 21.2 5.32
 -5 -5 -10 0.39 0.99
 -5 5 -10 0.32 0.76
 -5 5 -11 6.26 2.95
 -5 -5 -11 9.17 3.86
 5 -5 11 3.12 1.08
 5 5 11 6.95 2.91
 -5 -5 -12 -3.57 2.5
 -5 5 -12 -1.01 1.11
 5 5 12 -5.45 3.02
 5 -5 12 -4.15 2.8
 5 5 13 7 3.32
 -5 5 -13 0.63 0.79
 -5 -5 -13 5.51 3.57
 5 -5 13 4.33 2.88
 5 -6 -13 2.35 2.16
 5 -6 -12 11.85 4.27
 5 -6 -11 23.67 5.77
 5 -6 -10 -1.44 2.07
 5 -6 -9 7.54 3.35
 5 6 -9 6.98 2.33
 5 6 -8 14.46 3.22
 5 -6 -8 11.43 3.58
 5 6 -7 0.12 0.8
 -5 6 7 0.26 1.59
 5 -6 -6 16.92 4.21
 -5 6 6 19.84 4.53
 5 -6 -5 67.14 7.76
 -5 6 5 70.34 8.17
 5 6 -5 47.44 2.64
 -5 6 4 47 6.08
 5 -6 -4 47.55 6.35
 -5 -6 4 48.91 5.6
 -5 6 3 0.93 1.31
 5 -6 -3 1.58 1.23
 5 6 -3 0.94 0.73
 -5 -6 3 0.89 0.88
 5 -6 -3 0.31 0.79
 -5 6 2 4.14 1.56
 5 6 -2 4.69 1.53
 -5 6 2 5.95 1.71
 -5 -6 2 5.96 1.84
 5 -6 -2 6.14 1.71
 -5 -6 2 7.04 2.18
 5 -6 -2 4.21 1.82
 -5 6 1 13.07 3.22
 5 -6 -1 15.52 3.29
 -5 -6 1 13.31 3.28
 -5 6 1 13.05 2.62
 -5 -6 1 13.58 2.49
 5 6 -1 13.15 2.54
 5 -6 -1 16.38 3.06
 -5 6 0 27.36 4.36
 -5 6 0 25.09 3.29
 -5 -6 0 25.3 3.5
 -5 -6 0 15.6 1.52
 -5 6 -1 8.29 2.05
 -5 -6 -1 5.38 1.28
 -5 6 -2 117.74 8.12
 -5 -6 -2 128.48 9.6
 -5 6 -2 111.56 9.15
 -5 6 -3 -0.24 0.98
 -5 6 -3 1.37 0.95
 -5 -6 -3 1.72 1.28
 -5 6 -4 2.73 2.05
 -5 6 -4 4.99 1.91
 -5 -6 -4 3.7 1.74
 -5 6 -5 13.57 3.4
 -5 -6 -5 19.29 4.55
 -5 6 -6 1.27 1.36
 -5 -6 -6 0.73 1.05
 -5 6 -7 19.31 4.42
 -5 -6 -7 17.79 4.36
 -5 6 -8 6.08 2.92
 -5 -6 -8 2.36 1.35
 -5 6 -9 3.75 1.81
 -5 -6 -9 4.72 2.6
 -5 6 -10 16.46 4.62
 -5 -6 -10 19.16 5.27
 5 6 11 4.91 2.89
 -5 6 -11 2.22 1.83
 -5 -6 -11 5.4 3.49
 5 -6 11 4.27 3.07
 -5 -6 -12 0 1.16
 -5 6 -12 -2.49 2.04
 5 6 12 -0.88 1.14
 5 -6 12 0 1.03
 -5 6 -13 -2.11 2.02
 -5 -6 -13 2.41 2.77
 5 6 13 2.84 2.37
 5 -6 13 1.54 2.36
 5 -7 -13 4.21 3.41
 5 -7 -12 1.39 2.59
 5 -7 -11 0.03 1.24
 5 -7 -10 -0.41 1.77
 5 -7 -9 68.61 9.58
 5 -7 -8 19.16 4.82
 5 7 -8 23.84 3.93
 5 -7 -7 11.09 3.57
 -5 7 7 10.34 3.33
 -5 -7 6 124.73 9.15
 5 -7 -6 110.98 11.11
 -5 7 6 128.19 11.75
 -5 7 5 11.31 3.6
 -5 -7 5 11.17 2.89
 5 -7 -5 8.6 3.13
 -5 7 4 17.28 3.94
 -5 -7 4 22.26 4.02
 5 -7 -4 19.72 4.37
 5 -7 -3 146.67 9.71
 5 7 -3 127.67 8.54
 -5 -7 3 135.65 9.99
 5 -7 -3 129.04 10.26
 -5 7 3 118.89 9.79
 -5 7 2 3.79 1.77
 5 -7 -2 3.71 1.19
 -5 7 2 6.69 1.95
 5 7 -2 6.46 1.86
 -5 -7 2 7.1 2.22
 5 -7 -2 5.74 2.05
 -5 -7 2 3.11 1.45
 -5 7 1 36.39 5.2
 -5 7 1 34.27 4.03
 -5 -7 1 42.12 5.04
 -5 -7 1 39.64 5.58
 5 -7 -1 40.84 5.28
 -5 -7 0 -0.91 0.48
 -5 7 0 -0.76 1.69
 -5 -7 0 -0.59 1.66
 -5 -7 0 1.3 1.53
 -5 7 0 -0.2 0.64
 -5 7 -1 41.81 5.72
 -5 -7 -1 49.55 6.65
 -5 7 -2 2.87 1.53
 -5 7 -3 71.99 6.54
 -5 -7 -3 81.66 8
 -5 7 -3 64.93 7.55
 -5 7 -4 78.06 7.08
 -5 -7 -4 87 8.37
 -5 7 -4 74.44 8.38
 -5 7 -5 398.5 20.09
 -5 7 -5 410.75 17.68
 -5 -7 -5 446.83 20.67
 -5 7 -6 86.41 8.66
 -5 -7 -6 95.63 9.79
 -5 -7 -7 151.29 13.14
 -5 7 -7 136.1 11.35
 -5 7 -8 -0.99 1.68
 -5 -7 -8 -1.43 1.94
 -5 7 -9 3.5 1.87
 -5 -7 -9 5.15 2.27
 5 7 10 1.99 1.83
 -5 7 -10 0.51 1.16
 -5 -7 -10 -2.06 1.85
 5 -7 10 -0.25 1.3
 -5 7 -11 -0.53 2.09
 -5 -7 -11 2.68 2.49
 5 7 11 1.38 1.55
 5 -7 11 5.9 3.54
 5 -7 12 -0.94 1.88
 -5 7 -12 0.9 1.52
 -5 -7 -12 -5.12 3.08
 5 7 12 -0.68 1.3
 -5 7 -13 -1.2 1.53
 -5 -7 -13 0.03 1.24
 5 7 13 1.73 2.32
 5 -8 -12 1.24 1
 5 -8 -11 3.81 2.56
 5 -8 -10 11.09 3.92
 5 -8 -9 12.23 4.22
 -5 -8 8 0.88 1.23
 5 -8 -8 -0.38 0.84
 -5 -8 7 12.05 3.22
 5 -8 -7 9.42 3.64
 -5 8 7 11.17 3.65
 -5 -8 6 2.67 1.51
 5 -8 -6 0.55 2.15
 -5 8 6 1.32 1.03
 -5 8 5 42.44 6.8
 5 -8 -5 38.66 6.25
 -5 -8 5 46.65 5.97
 -5 8 4 1.12 1.41
 -5 -8 4 0.76 1.3
 5 -8 -4 2.61 2.14
 5 8 -4 0.35 0.75
 5 -8 -3 121.91 8.82
 5 8 -3 114.8 8.01
 5 -8 -3 127.66 10.12
 -5 -8 3 127.79 10.42
 -5 8 3 114.19 10.09
 -5 8 2 3.83 1.75
 -5 -8 2 5.67 2.31
 5 -8 -2 5.81 2.03
 -5 -8 2 7.36 2.42
 5 8 -2 5.13 1.71
 5 -8 -2 5.13 1.41
 -5 8 1 73.69 5.74
 -5 -8 1 74.28 6.39
 -5 -8 1 74.22 8.23
 5 -8 -1 73.82 7.32
 -5 8 1 67.24 7.76
 -5 8 0 -0.85 1.23
 -5 -8 0 -0.26 0.31
 -5 -8 0 0.74 0.84
 -5 8 0 -0.58 0.36
 -5 -8 0 -0.84 1.12
 -5 8 -1 26.95 4.89
 -5 8 -1 31.66 3.84
 -5 -8 -1 22.15 2.67
 -5 8 -2 11.96 3.26
 -5 -8 -2 12.39 3.31
 -5 8 -3 -0.86 1.13
 -5 -8 -3 1.03 0.72
 -5 8 -3 1.52 1.48
 -5 8 -4 -0.69 1.02
 -5 8 -4 1.11 0.71
 -5 8 -5 37.27 6.21
 -5 8 -5 34.78 4.92
 -5 -8 -5 42.72 6.04
 -5 8 -6 2.93 1.14
 -5 8 -6 4.34 1.7
 -5 -8 -6 6.67 2.5
 -5 -8 -7 17.63 4.78
 -5 8 -7 14.2 3.52
 -5 8 -8 -0.09 0.8
 -5 -8 -8 -0.31 1.42
 -5 8 -9 -0.07 0.79
 -5 -8 -9 0.58 1.72
 -5 8 -10 12.08 3.87
 -5 -8 -10 16.8 4.86
 5 -8 10 11.36 4.02
 5 8 10 21.84 5.27
 -5 8 -11 1.48 1.99
 -5 -8 -11 2.4 2.32
 5 8 11 3.88 1.73
 5 -8 11 4.83 3.23
 -5 8 -12 1.93 2.16
 -5 -8 -12 -1.36 1.64
 5 -8 12 2.93 2.59
 5 8 12 2.06 1.52
 -5 8 -13 1.64 2.45
 5 8 13 0.35 0.89
 5 -8 13 -2.73 2.43
 5 -9 -12 0 2.35
 5 -9 -11 0.05 1.67
 5 -9 -10 5.1 2.91
 5 -9 -9 4.23 2.6
 -5 -9 8 23.88 4.5
 5 -9 -8 22.39 5.41
 -5 -9 7 7.52 2.61
 5 -9 -7 7.11 3.09
 -5 9 7 3.68 2.45
 -5 -9 6 6.79 2.75
 5 -9 -6 2.35 1.82
 -5 9 6 5.09 2.37
 -5 9 5 24.54 5.53
 -5 -9 5 34.64 5.43
 5 -9 -5 25.36 4.93
 -5 -9 4 144.72 11.57
 5 -9 -4 150.5 10.59
 5 9 -4 139.98 9.34
 5 -9 -4 129.27 11.1
 -5 9 4 133.94 11.87
 5 -9 -3 251.41 12.96
 5 9 -3 228.19 11.15
 -5 -9 3 250.61 15.71
 5 -9 -3 232.49 14.73
 -5 9 3 215.36 14.39
 -5 9 2 50.08 6.86
 -5 -9 2 48.54 7.02
 5 -9 -2 59.03 6.26
 5 9 -2 55.33 5.28
 5 -9 -2 58.97 7.19
 -5 9 1 20.73 4.57
 -5 9 1 17.25 2.78
 -5 -9 1 21.88 3.71
 -5 -9 1 19.24 4.43
 5 -9 -1 19.24 3.92
 -5 9 0 -2.24 1.78
 -5 -9 0 0.35 1.49
 -5 9 0 0.52 0.79
 -5 -9 0 0.1 0.97
 -5 9 -1 0.06 1.56
 -5 -9 -1 1.97 0.97
 -5 9 -1 0.96 0.89
 -5 -9 -1 -0.18 0.47
 -5 -9 -2 47.52 7.05
 -5 9 -2 41.24 6.15
 -5 -9 -3 235.82 15.7
 -5 9 -3 201.87 14.1
 -5 9 -4 -0.36 1.08
 -5 9 -4 -1.53 1.18
 -5 -9 -4 1.6 1.99
 -5 9 -5 34.61 6.05
 -5 9 -5 33.03 4.96
 -5 -9 -5 39.62 6.15
 -5 -9 -6 18.72 4.37
 -5 9 -6 12.23 3.76
 -5 9 -6 14.17 3.34
 -5 9 -7 12.54 4
 -5 9 -7 17.94 4.09
 -5 -9 -7 18.92 4.59
 -5 -9 -8 -0.55 1.14
 -5 9 -8 -3.12 2.74
 -5 9 -8 -1.27 1.22
 -5 9 -9 -0.33 0.57
 -5 -9 -9 1.23 1.85
 5 9 9 -1.08 1.15
 5 -9 9 -2.35 2.23
 -5 9 -10 2.75 2.06
 -5 -9 -10 5.82 3.14
 5 -9 10 2.02 1.92
 5 9 10 7.07 3.03
 -5 9 -11 4.05 2.43
 -5 -9 -11 3.79 2.75
 5 9 11 3.14 1.9
 -5 9 -12 -0.66 1.4
 -5 -9 -12 2.14 2.02
 5 9 12 -2.84 2.1
 5 -9 12 1.58 1.96
 -5 9 -13 -3.84 2.6
 -5 -9 -13 -0.12 0.73
 5 9 13 -0.52 1.59
 5 -9 13 -0.93 2.3
 5 -10 -11 0.37 1.15
 5 -10 -10 8.86 3.72
 5 -10 -9 4.89 2.9
 -5 -10 8 -1.04 1.34
 5 -10 -8 3.23 2.23
 -5 -10 7 -1.92 1.7
 5 -10 -7 -1.99 2.35
 -5 10 7 -0.02 0.96
 -5 -10 6 6.27 2.61
 5 -10 -6 3.22 1.82
 -5 10 6 4.06 2.33
 -5 10 5 25.32 5.23
 5 -10 -5 29.64 5.91
 5 -10 -5 29.55 4.94
 5 10 -5 30 4.45
 -5 -10 5 32.72 5.7
 5 -10 -4 67.98 6.79
 5 10 -4 64.43 6.06
 -5 -10 4 65.72 8.07
 5 -10 -4 64.68 7.75
 -5 10 4 59.9 8.32
 -5 10 3 4.51 2.09
 -5 -10 3 7.48 3.04
 5 -10 -3 7.57 2.26
 5 10 -3 7.15 1.93
 5 -10 -3 6.7 2.14
 -5 -10 2 115.06 11.26
 5 -10 -2 105.45 9.5
 -5 10 2 96.11 9.73
 -5 10 1 23.84 4.83
 -5 -10 1 24.97 3.72
 -5 -10 1 26.87 5.62
 -5 10 0 23.84 5.12
 -5 10 0 22.87 3.06
 -5 -10 0 23.92 3.74
 -5 -10 0 26.55 5.69
 -5 10 -1 -0.98 1.42
 -5 10 -1 0.12 0.5
 -5 -10 -1 0.84 0.94
 -5 -10 -1 -1.54 1.61
 -5 10 -2 0.16 0.85
 -5 -10 -2 0.83 1.13
 -5 10 -2 -0.07 0.51
 -5 -10 -3 2.69 1.88
 -5 10 -3 4.12 2.28
 -5 10 -4 21.53 3.74
 -5 -10 -4 25.09 4.43
 -5 10 -4 13.38 4.04
 -5 -10 -4 16.98 4.49
 -5 10 -5 -0.47 1.2
 -5 10 -5 0.8 1.22
 -5 -10 -5 0.22 0.76
 -5 10 -6 -1.98 1.36
 -5 -10 -6 0.14 1.48
 -5 10 -6 -0.8 0.9
 -5 10 -7 10.14 3.77
 -5 10 -7 5.6 2.06
 -5 -10 -7 7.31 2.94
 -5 10 -8 -1.05 2
 5 -10 8 -0.7 1.81
 5 10 8 2.8 1.98
 -5 10 -8 -1.95 1.46
 -5 -10 -8 -0.55 1.89
 -5 10 -9 -2.1 2.36
 5 -10 9 0.06 1.2
 -5 10 -9 1 1.24
 -5 -10 -9 2.42 2.08
 -5 -10 -10 0.87 0.95
 -5 10 -10 0.91 1.49
 5 10 10 3.38 1.7
 5 10 11 -0.05 1.1
 5 -11 -11 0 1.58
 5 -11 -10 -3.97 2.66
 5 -11 -9 0.15 1.1
 5 -11 -8 0.45 1.81
 -5 -11 7 6.72 2.86
 5 -11 -7 5.16 2.24
 -5 11 7 5.58 2.65
 -5 -11 6 3.65 1.88
 5 -11 -6 7.28 2.27
 -5 11 6 2.51 1.96
 -5 -11 5 5.01 1.96
 5 -11 -5 5.31 2.84
 -5 11 5 6.25 2.81
 -5 11 4 6.7 2.73
 -5 -11 4 8.01 3.12
 5 -11 -4 4.24 2.11
 -5 11 3 12.32 3.88
 5 -11 -3 16.52 3.93
 -5 -11 3 15.81 4.05
 -5 11 2 5.33 2.27
 -5 -11 2 4.83 2.47
 5 -11 -2 8.81 3.49
 -5 11 1 23.75 5.01
 -5 -11 1 27.57 5.72
 -5 11 0 59.3 8.04
 -5 -11 0 71.53 9.25
 -5 11 -1 44.29 6.78
 -5 -11 -1 56.88 8.24
 -5 11 -2 29.96 5.59
 -5 -11 -2 36.88 6.78
 -5 -11 -3 3.25 1.89
 -5 11 -3 4.83 2
 -5 11 -4 -0.69 1.25
 -5 -11 -4 0.2 1.74
 -5 11 -5 1.22 1.06
 -5 11 -6 2.02 1.78
 -5 11 -7 -0.6 1.08
 -5 11 -8 0.9 1.28
 -5 11 -9 -0.69 2.16
 -5 11 -10 0.06 0.95
 -5 11 -11 1.01 1.85
 5 -12 -10 3.61 3.1
 5 -12 -9 0 0.84
 5 -12 -8 -2.13 1.85
 -5 -12 7 7.41 2.97
 -5 12 7 7.61 3.3
 5 -12 -6 -0.38 1.19
 -5 -12 6 2.86 2.16
 -5 12 6 5.03 2.68
 -5 -12 5 0.45 1.1
 5 -12 -5 -0.57 1.38
 -5 12 5 -0.45 0.78
 -5 12 4 46.56 7.56
 -5 -12 4 56.31 8.3
 5 -12 -4 46.23 6.96
 -5 12 3 1.91 1.32
 -5 -12 3 0.47 1.53
 5 -12 -3 3.55 2.15
 -5 12 2 -0.83 0.85
 5 -12 -2 0.55 0.7
 -5 12 1 27.03 5.52
 -5 -12 1 29.55 6.24
 -5 12 0 1.82 1.72
 -5 -12 0 -0.54 1.5
 -5 12 -1 19.13 4.59
 -5 -12 -1 30 6.21
 -5 12 -2 6.88 2.64
 -5 -12 -2 14.13 4.19
 -5 12 -3 -0.9 1.36
 -5 -12 -3 -1.58 2.31
 -5 12 -4 0.77 0.79
 -5 -12 -4 3.23 2.49
 -5 12 -5 -1.09 1.78
 -5 -12 -5 -3.91 2.6
 -5 12 -6 1.36 1.32
 -5 12 -7 2.81 2.15
 -5 12 -8 4.39 2.69
 -5 12 -9 1.53 1.06
 -5 12 -10 0.07 1.78
 5 -13 -10 0 1.72
 5 -13 -9 2.02 2.43
 5 -13 -8 3.84 2.47
 -5 -13 7 0.96 1
 5 -13 -7 1.55 2.1
 -5 13 7 1.02 1.35
 -5 -13 6 6.54 2.63
 5 -13 -6 6.06 3.08
 -5 13 6 6.82 3
 5 -13 -5 4.26 2.41
 -5 -13 5 8.75 3.32
 -5 13 5 8.39 3.27
 -5 13 4 4.65 2.67
 -5 -13 4 4.74 2.59
 5 -13 -4 2.81 1.88
 -5 13 3 2.72 1.7
 -5 -13 3 1.21 1.36
 5 -13 -3 4.13 2.14
 -5 13 2 36.47 6.6
 -5 -13 2 42.35 7.45
 -5 13 1 16.97 4.48
 -5 -13 1 19.9 5.1
 -5 13 0 7.08 2.95
 -5 -13 0 8.93 3.27
 -5 13 -1 1.16 1.03
 -5 -13 -1 2.51 1.8
 -5 13 -2 11.48 3.59
 -5 -13 -2 15.92 4.67
 -5 13 -3 2.38 1.73
 -5 -13 -3 0.8 1.37
 -5 13 -4 2.61 1.8
 -5 -13 -4 10.37 3.82
 -5 13 -5 -0.61 1.25
 -5 -13 -5 -2.9 2.76
 -5 13 -6 -0.41 0.53
 -5 13 -7 7.02 3.1
 -5 13 -8 4.15 2.71
 -5 13 -9 -1.31 1.56
 5 -14 -9 0 0.81
 5 -14 -8 -3.81 2.88
 -5 -14 7 -0.43 0.81
 5 -14 -7 3.65 2.67
 -5 14 7 4.58 2.94
 5 -14 -6 2.35 2.32
 -5 -14 6 0.33 0.9
 -5 14 6 1.19 1.62
 -5 -14 5 1.74 1.29
 5 -14 -5 5.24 2.82
 -5 14 5 4.56 2.7
 -5 14 4 8.34 3.54
 -5 -14 4 8.28 3.34
 -5 14 3 3.73 2.62
 -5 -14 3 1.18 1.22
 -5 14 2 0.34 0.97
 -5 -14 2 0.42 1.63
 -5 -14 1 28.93 6.2
 -5 14 1 26.04 5.54
 -5 14 0 0.11 1.03
 -5 -14 0 -0.44 1.18
 -5 14 -1 4.42 2.28
 -5 -14 -1 3.49 2.49
 -5 14 -2 11.68 3.82
 -5 -14 -2 15.48 4.75
 -5 14 -3 -1.29 2.14
 -5 -14 -3 -0.39 2.59
 -5 14 -4 1.46 1.79
 -5 -14 -4 16.43 4.97
 -5 14 -5 2.48 2.12
 -5 -14 -5 13.35 5.27
 -5 14 -6 -1.85 2.02
 -5 14 -7 0.95 1.51
 -5 14 -8 -0.59 1.13
 -5 14 -9 0.89 1.45
 5 -15 -9 -0.57 1.3
 5 -15 -8 -1.15 2.25
 -5 -15 7 -1.48 2.18
 -5 -15 6 1.6 1.56
 -5 15 6 0.35 1.38
 -5 -15 5 -0.3 1.71
 -5 15 5 1.79 1.73
 -5 -15 4 -0.51 1.18
 -5 15 4 1.16 1.31
 -5 15 3 -0.62 1.32
 -5 -15 3 0.89 1.8
 -5 15 2 5.95 2.95
 -5 -15 2 24.46 6.22
 -5 15 1 2.09 1.62
 -5 -15 1 12.03 4.35
 -5 15 0 -2.01 1.63
 -5 -15 0 2.12 1.77
 -5 15 -1 0.39 1.38
 -5 -15 -1 9.47 4.01
 -5 15 -2 1.72 1.44
 -5 -15 -2 1.3 1.57
 -5 15 -3 -2.61 2.38
 -5 -15 -3 5.72 3.13
 -5 15 -4 0.81 1.17
 -5 -15 -4 5.85 3.85
 -5 15 -5 -0.07 0.86
 -5 -15 -5 -1.46 1.68
 -5 15 -6 -0.64 1.15
 -5 15 -7 -0.97 1.85
 -5 15 -8 -1.42 1.58
 -5 -16 7 0.46 1.06
 -5 -16 6 -4.21 2.8
 -5 -16 5 2.26 2.37
 -5 16 5 0.9 1.96
 -5 -16 4 3.7 2.9
 -5 16 4 2.36 2.36
 -5 16 3 -2.33 2.14
 -5 -16 3 -5.45 3.18
 -5 16 2 -2.85 2.32
 -5 -16 2 -5.11 3.06
 -5 16 1 0.25 1.06
 -5 -16 1 -4.18 2.85
 -5 16 0 -0.63 1.02
 -5 -16 0 1.21 0.91
 -5 16 -1 -1.44 1.49
 -5 -16 -1 0.18 0.98
 -5 16 -2 -2.31 1.88
 -5 -16 -2 2.86 3.04
 -5 16 -3 0.87 1.28
 -5 -16 -3 1.72 3.05
 -5 16 -4 0.62 0.51
 -5 -16 -4 10.49 4.73
 -5 16 -5 0.58 1.37
 -5 16 -6 -3.55 2.43
 -5 17 3 1.44 2.31
 -5 17 2 1.41 1.95
 -5 17 1 1.46 1.87
 -5 17 0 0.18 1.07
 -5 17 -1 0.25 0.52
 -5 17 -2 0 0.91
 -5 17 -3 0.17 1.16
 -5 17 -4 -0.78 1.22
 6 0 -15 0.9 0.88
 6 0 -14 0.99 1.53
 6 0 -13 -2.7 2.21
 6 0 -12 2.38 2.24
 6 0 -11 1.49 1.21
 6 0 -10 9.01 3.1
 6 0 -9 -1.25 1.86
 6 0 -8 140.49 12.07
 6 0 -7 -0.3 1.15
 6 0 -6 155.84 11.67
 6 0 -5 -0.23 0.99
 -6 0 5 1.38 1.04
 -6 0 4 167.94 11.35
 6 0 -4 174.62 11.17
 -6 0 4 171.64 9.57
 -6 0 3 -1.46 1.2
 -6 0 3 -1.81 1.57
 6 0 -3 -1.09 0.98
 -6 0 2 63.86 6.76
 6 0 -2 52.31 5.86
 -6 0 2 57.79 5.02
 -6 0 1 2.87 1.74
 -6 0 1 3.25 2.07
 6 0 -1 1.86 1.76
 -6 0 0 591.67 16.43
 -6 0 -1 -1.28 1.32
 -6 0 -2 217.98 12.55
 -6 0 -3 1.65 1.68
 -6 0 -4 62.51 7.34
 -6 0 -5 -0.14 1.06
 -6 0 -6 3.31 2.38
 -6 0 -7 -0.99 1.28
 -6 0 -8 9.59 3.59
 -6 0 -9 0.31 1.07
 -6 0 -10 0.64 1.21
 -6 0 -11 1.43 2.19
 -6 0 -12 3.11 3.22
 6 0 13 0.65 1.43
 -6 0 -13 -1.14 0.85
 6 1 -15 4.02 2.91
 6 -1 -14 0.47 1.24
 6 1 -14 4.27 2.77
 6 -1 -13 0.36 1.04
 6 1 -13 4.65 2.54
 6 -1 -12 17.98 5.32
 6 1 -12 14.06 4.4
 6 -1 -11 1.57 1.5
 6 1 -11 -0.1 1.49
 6 -1 -10 14.63 4.34
 6 1 -10 15.32 4.29
 6 -1 -9 86.23 10.21
 6 1 -9 89.25 9.89
 6 -1 -8 8.35 3.21
 6 1 -8 10.49 3.05
 6 1 -7 91.06 9.28
 6 -1 -7 89.92 9.26
 6 -1 -6 12.8 3.44
 6 1 -6 16.7 3.68
 6 -1 -5 62.62 7.1
 6 1 -5 62.09 6.94
 -6 1 5 69.05 6.74
 -6 1 4 4.63 1.62
 -6 1 4 5.42 2.01
 -6 -1 4 5.33 1.96
 6 -1 -4 7.52 2.95
 6 1 -4 5.12 1.96
 -6 -1 4 5.12 1.74
 6 1 -3 40.24 5.33
 -6 1 3 40.1 5.43
 -6 -1 3 40.6 5.36
 6 -1 -3 39.56 5.16
 -6 -1 3 37.27 4.13
 -6 1 3 38.39 4.45
 -6 1 2 74.12 7.21
 -6 -1 2 72.44 7.34
 6 -1 -2 66.77 6.59
 6 1 -2 64.39 6.61
 -6 -1 2 59.97 5.08
 -6 1 2 63.49 5.71
 -6 1 1 2.04 1.03
 -6 -1 1 3.85 0.99
 -6 1 1 2.48 1.13
 -6 -1 1 0.01 1.7
 6 -1 -1 3.24 1.64
 6 1 -1 1.65 0.81
 -6 1 0 6.09 1.72
 -6 -1 0 7.75 1.31
 -6 1 -1 22.37 3.58
 -6 1 -2 53 6.08
 -6 -1 -2 53.12 6.38
 -6 1 -3 15.82 3.38
 -6 -1 -3 17.41 3.65
 -6 1 -4 97.6 9.04
 -6 -1 -4 100.86 9.45
 -6 1 -5 6.44 2.29
 -6 -1 -5 7.57 2.7
 -6 1 -6 28.63 5.26
 -6 -1 -6 31.28 5.83
 -6 1 -7 23.17 5.06
 -6 -1 -7 22.96 5.02
 -6 1 -8 1.52 1.29
 -6 -1 -8 3.2 1.91
 -6 1 -9 32.38 6.35
 -6 -1 -9 36.8 7.18
 -6 1 -10 12.99 4.56
 -6 -1 -10 14.24 4.42
 -6 1 -11 0.08 1.07
 -6 -1 -11 -2.76 2.29
 -6 1 -12 4.35 2.82
 -6 -1 -12 3.9 2.74
 6 1 13 2.76 2.77
 -6 1 -13 3.57 2.75
 -6 -1 -13 -1.72 2.64
 6 -1 13 -5.53 3.44
 6 2 -15 3.18 3.33
 6 -2 -14 -5.23 3.24
 6 2 -14 0.09 1.2
 6 -2 -13 6.74 3.07
 6 2 -13 7.43 3.48
 6 -2 -12 0.71 1.76
 6 2 -12 -2.1 2.09
 6 -2 -11 0.97 1.22
 6 2 -11 5.34 2.58
 6 -2 -10 15.87 4.92
 6 2 -10 11.82 3.72
 6 -2 -9 159.24 14.05
 6 2 -9 162.76 12.95
 6 -2 -8 19.05 4.55
 6 2 -8 19.19 4.51
 6 -2 -7 80.73 9.09
 6 2 -7 82.68 8.42
 6 -2 -6 37.87 5.8
 6 2 -6 36.82 5.38
 -6 2 6 35.03 5.26
 6 -2 -5 138.4 10.85
 6 2 -5 133.55 10.02
 -6 2 5 144.84 10.4
 6 -2 -4 208.22 12.87
 -6 2 4 206.1 12.51
 -6 -2 4 216.24 12.94
 6 2 -4 218.69 12.27
 -6 2 4 218.31 12.03
 -6 2 3 2.31 0.78
 6 2 -3 3.07 1.04
 -6 2 3 3.93 1.76
 -6 -2 3 3.72 1.99
 6 -2 -3 1.88 0.88
 6 2 -3 3.34 1.69
 6 -2 -3 3.09 1.07
 -6 -2 3 2.18 0.79
 -6 -2 2 3.25 0.96
 -6 2 2 3.81 1.86
 6 -2 -2 3.68 1.94
 6 2 -2 2.53 1.5
 -6 2 2 2.33 1.12
 -6 -2 2 4.1 2.09
 -6 2 1 664.23 20.16
 -6 -2 1 677.72 20.84
 6 -2 -1 671.89 21.31
 6 2 -1 673.86 20.92
 -6 2 1 662.04 19.38
 -6 -2 1 611.05 14.42
 -6 2 0 18.1 3.14
 -6 -2 0 13.11 2.29
 -6 2 -1 36.34 4.67
 -6 2 -2 547.92 19.51
 -6 -2 -2 586.64 20.58
 -6 2 -2 525.9 18.63
 -6 2 -3 37.53 5.21
 -6 -2 -3 37.4 5.5
 -6 2 -4 203.05 13.02
 -6 -2 -4 235.8 14.33
 -6 2 -5 171.99 12.46
 -6 -2 -5 181.36 13.28
 -6 2 -6 108.5 10.26
 -6 -2 -6 113.09 10.82
 -6 2 -7 72.71 8.8
 -6 -2 -7 62.96 8.34
 -6 2 -8 10.05 3.36
 -6 -2 -8 10.34 3.72
 -6 2 -9 29.89 6.07
 -6 -2 -9 31.44 6.13
 -6 2 -10 1.27 1.82
 -6 -2 -10 2.4 2.09
 -6 2 -11 -2.25 2.04
 -6 -2 -11 2.67 2.28
 -6 2 -12 0.7 1.17
 -6 -2 -12 3.59 3.13
 -6 2 -13 0.75 0.93
 6 -2 13 2.16 1.32
 6 -3 -14 37.32 8.58
 6 3 -14 18.48 5.62
 6 -3 -13 -0.89 1.55
 6 3 -13 -0.79 1.17
 6 -3 -12 0.27 1.87
 6 3 -12 -1.31 1.23
 6 -3 -11 8.57 2.79
 6 3 -11 9.78 3.76
 6 -3 -10 4.72 3.05
 6 3 -10 1.9 1.88
 6 3 -9 52.18 7.28
 6 -3 -9 53.7 7.94
 6 -3 -8 3.62 1.07
 6 3 -8 5.53 2.17
 6 3 -7 1.96 1.18
 6 -3 -7 0.77 1.36
 6 -3 -6 21.62 4.38
 6 3 -6 24.06 4.2
 -6 3 6 22.37 4.39
 6 -3 -5 25.29 4.67
 6 3 -5 23.8 4.13
 -6 3 5 22.34 4.35
 6 -3 -4 77.08 7.97
 -6 3 4 76.52 7.48
 6 -3 -3 46.84 5.75
 6 3 -3 42.66 5.5
 -6 3 3 42.56 5.36
 -6 -3 3 40.71 5.45
 6 -3 -3 42.04 5.71
 -6 -3 3 39.94 3.17
 -6 3 3 41 4.98
 6 3 -3 40.24 3.16
 -6 3 2 18.31 3.46
 -6 -3 2 22.52 4.16
 6 -3 -2 21.33 3.64
 6 3 -2 19.41 3.52
 -6 3 2 21.16 3.73
 6 -3 -2 19.59 3.83
 -6 -3 2 16.63 1.93
 -6 3 1 23.36 3.53
 6 -3 -1 27.46 4.56
 6 3 -1 27.95 4.17
 -6 3 1 25.57 3.86
 -6 -3 1 22.86 3.84
 -6 -3 1 26.12 2.57
 -6 3 0 3.8 1.58
 -6 -3 0 7.24 1.55
 -6 3 -1 198.9 11.44
 -6 3 -2 127.7 9.35
 -6 -3 -2 134.94 9.8
 -6 3 -2 125.19 9.25
 -6 3 -3 18.89 3.66
 -6 -3 -3 16.42 3.45
 -6 3 -4 245.14 13.95
 -6 -3 -4 251.01 14.9
 -6 3 -5 63.03 7.56
 -6 -3 -5 62.73 7.8
 -6 -3 -6 54.42 7.56
 -6 3 -6 54.73 7.4
 -6 3 -7 46.01 7.09
 -6 -3 -7 45.75 7.38
 -6 3 -8 42.46 7
 -6 -3 -8 42.36 7.19
 -6 3 -9 14.81 4.21
 -6 -3 -9 16.3 4.51
 -6 3 -10 5.18 2.85
 -6 -3 -10 6.68 3.17
 -6 3 -11 4.69 2.86
 -6 -3 -11 1.22 2.07
 -6 3 -12 -1.89 1.93
 -6 -3 -12 1.62 2.55
 -6 3 -13 -0.82 1.42
 -6 -3 -13 1.45 2.62
 6 3 13 2.9 3.11
 6 -3 13 3.42 2.99
 6 -4 -13 0.24 1.7
 6 -4 -12 1.04 1.53
 6 4 -12 3.75 1.89
 6 -4 -11 8.49 3.66
 6 4 -11 8.84 3.28
 6 4 -10 2.09 0.75
 6 -4 -10 5.96 3.09
 6 -4 -9 122.91 12.54
 6 4 -9 127.03 10.91
 6 -4 -8 27.16 5.62
 6 4 -8 26.63 4.67
 6 -4 -7 106.92 10.63
 6 4 -7 106.82 9.41
 -6 4 7 93.11 9.72
 6 4 -6 51.42 6.24
 6 -4 -6 48.32 6.85
 -6 4 6 47.74 6.71
 -6 4 5 1.67 0.79
 6 4 -5 1.13 0.56
 6 -4 -5 1.46 1.04
 -6 4 4 17.59 3.59
 6 -4 -4 18.93 3.91
 6 4 -4 17.02 1.79
 -6 4 3 70.93 7.04
 -6 -4 3 71.19 7.35
 6 -4 -3 67.26 7.02
 6 4 -3 72.44 7.08
 6 -4 -3 72.67 7.7
 -6 4 3 63.41 6.7
 -6 4 2 87.38 7.71
 -6 -4 2 97.87 8.69
 6 -4 -2 93.61 7.88
 6 4 -2 87.34 7.31
 6 -4 -2 96.34 8.62
 -6 4 2 91.79 7.97
 -6 4 1 137.23 9.28
 -6 -4 1 136.6 9.77
 6 -4 -1 152.05 10.16
 6 4 -1 141.77 9.48
 -6 -4 1 128.38 4.67
 -6 4 1 135.77 9.7
 -6 4 0 46.16 5.76
 -6 -4 0 42.8 3.38
 -6 4 -1 137.58 9.73
 -6 4 -2 2.91 1.79
 -6 -4 -2 2.39 1.45
 -6 4 -2 2.49 1.04
 -6 4 -3 13.25 3.53
 -6 4 -3 12.61 3.12
 -6 -4 -3 14.82 3.4
 -6 4 -4 113.58 9.59
 -6 -4 -4 129.34 10.8
 -6 4 -5 86.61 8.8
 -6 -4 -5 91.54 9.54
 -6 4 -6 228.95 14.99
 -6 -4 -6 232.63 15.99
 -6 4 -7 171.64 13.5
 -6 -4 -7 175.48 14.5
 -6 4 -8 2.66 1.98
 -6 -4 -8 -0.37 1.29
 -6 4 -9 38.85 7.06
 -6 -4 -9 33.91 6.79
 -6 4 -10 2.45 1.97
 -6 -4 -10 1.72 1.45
 -6 4 -11 3.82 2.8
 -6 -4 -11 -0.06 1.24
 6 4 12 -0.52 1.24
 -6 4 -12 1.78 2.1
 -6 -4 -12 3.46 3.04
 6 -4 12 4.54 3.69
 -6 4 -13 -1.12 1.52
 -6 -4 -13 1.34 2.3
 6 4 13 -1.54 1.79
 6 -4 13 -2.62 2.4
 6 -5 -13 1.08 2.79
 6 -5 -12 1.34 1.3
 6 -5 -11 12.38 4.26
 6 5 -11 8.28 2.83
 6 5 -10 -0.38 0.99
 6 -5 -10 -1.43 2.6
 6 -5 -9 7.31 3.11
 6 5 -9 6.95 2.6
 6 -5 -8 2.11 1.2
 6 5 -8 0.76 0.83
 6 -5 -7 305.81 18.64
 6 5 -7 324.66 15.79
 -6 5 7 297.98 18.11
 6 -5 -6 67.25 8.35
 -6 5 6 71.31 8.58
 -6 5 5 43.38 6.42
 6 -5 -5 43.12 6.67
 6 5 -5 25.82 2.17
 -6 5 4 23.81 4.4
 6 -5 -4 20.91 4.42
 -6 5 3 13.65 3.2
 -6 5 3 18.87 3.66
 -6 -5 3 18.13 3.69
 6 -5 -3 18.04 3.46
 6 5 -3 19.82 3.6
 6 -5 -3 16.98 3.54
 -6 5 2 83.13 7.22
 -6 -5 2 92.22 8.2
 6 -5 -2 81.38 7.46
 6 5 -2 80.65 7.04
 6 -5 -2 82.82 8.05
 -6 5 2 84.66 8.04
 -6 5 1 10.55 2.66
 6 -5 -1 16.62 3.42
 6 5 -1 12.09 2.74
 -6 5 1 11.41 2.62
 -6 -5 1 12.69 2.99
 -6 5 0 298.9 13.08
 -6 5 0 294 15.01
 -6 -5 0 275.02 7.55
 -6 5 -1 34.13 5.21
 -6 -5 -2 1.07 1.3
 -6 5 -2 0.3 0.93
 -6 5 -3 24.58 4.58
 -6 5 -3 23.09 4.21
 -6 -5 -3 31.85 5.32
 -6 5 -4 21.19 4.75
 -6 -5 -4 25.21 4.63
 -6 5 -4 19.89 3.92
 -6 5 -5 37.88 5.65
 -6 -5 -5 42.45 6.45
 -6 5 -6 1 1.15
 -6 -5 -6 1.23 1.65
 -6 5 -7 11.14 3.29
 -6 -5 -7 13.97 4.22
 -6 5 -8 1.99 2.15
 -6 -5 -8 0.82 1.76
 -6 5 -9 1.04 1.67
 -6 -5 -9 -1.14 1.94
 -6 5 -10 0.47 1.04
 -6 -5 -10 1.94 1.86
 -6 5 -11 3.37 2.6
 -6 -5 -11 -4.7 2.86
 6 -5 12 0 1.08
 -6 5 -12 0.43 1.05
 -6 -5 -12 1.27 1.79
 6 5 12 -1.25 1.65
 -6 5 -13 1.19 1.87
 -6 -5 -13 0 1.78
 6 -5 13 0.24 1.8
 6 5 13 0.52 1.15
 6 -6 -13 -1.01 1.65
 6 -6 -12 5.78 3.74
 6 -6 -11 7.8 3.23
 6 -6 -10 3.86 2.6
 6 6 -9 7.69 2.24
 6 -6 -9 7.01 2.83
 6 -6 -8 -0.62 1.72
 6 6 -8 -1.36 1.52
 6 -6 -7 14.09 3.79
 -6 6 7 8.09 2.76
 6 -6 -6 62.56 8.16
 -6 6 6 70.51 8.75
 -6 6 5 6.31 2.74
 6 -6 -5 0.7 0.96
 -6 6 4 14.11 3.69
 6 6 -4 13.51 3.26
 6 -6 -4 13.65 3.68
 -6 6 3 0.81 1.31
 -6 6 3 3.14 1.16
 -6 -6 3 4.62 1.97
 6 -6 -3 3.46 1.11
 6 6 -3 4.23 1.51
 6 -6 -3 5.29 2.37
 -6 6 2 -0.8 1.12
 -6 6 2 0.42 0.65
 -6 -6 2 0.43 0.88
 6 6 -2 -0.49 0.95
 6 -6 -2 -2.33 1.86
 6 -6 -2 -0.95 1.05
 -6 6 1 95.59 7.7
 -6 -6 1 107.48 8.98
 6 -6 -1 99.93 8.29
 6 6 -1 93.44 7.47
 -6 6 1 91.38 8.5
 -6 6 0 15.78 3.46
 -6 6 0 20.05 3.53
 -6 -6 0 23.22 4.02
 -6 -6 0 10.83 1.25
 -6 -6 0 12.62 1.43
 -6 6 -1 1.66 0.91
 -6 6 -2 6.65 2.45
 -6 6 -3 12.9 2.99
 -6 -6 -3 15.11 3.87
 -6 6 -3 10.03 3
 -6 6 -4 57.16 7.44
 -6 6 -4 61.89 7
 -6 -6 -4 64.46 8.04
 -6 6 -5 23.34 5.06
 -6 6 -5 19.44 3.97
 -6 -6 -5 20.8 4.84
 -6 -6 -6 18.79 4.55
 -6 6 -6 19.72 4.51
 -6 6 -7 14.82 4.16
 -6 -6 -7 13.92 3.95
 -6 6 -8 6.16 2.8
 -6 -6 -8 5.66 2.8
 -6 6 -9 1.61 1.32
 -6 -6 -9 2.98 1.8
 -6 6 -10 -0.57 1.79
 -6 -6 -10 1.15 1.5
 -6 6 -11 -5.81 3.35
 -6 -6 -11 2.04 2.21
 -6 6 -12 1.16 1.28
 -6 -6 -12 2.33 2.4
 6 6 12 -1.01 2.11
 6 -6 12 1.3 2.05
 -6 6 -13 0 0.98
 -6 -6 -13 -3.44 2.63
 6 6 13 3.61 2.84
 6 -6 13 7.51 4.75
 6 -7 -12 3.66 2.75
 6 -7 -11 0.86 1.93
 6 -7 -10 20.13 5.39
 6 -7 -9 25.21 5.84
 6 -7 -8 17.1 4.72
 6 -7 -7 3.24 2.38
 -6 7 7 3.26 1.83
 6 -7 -6 7.92 3.1
 -6 7 6 13.31 4.09
 -6 7 5 0.67 1.32
 6 -7 -5 0.16 1.38
 -6 7 4 29.54 5.19
 6 7 -4 36.92 5.24
 6 -7 -4 30.35 5.06
 6 -7 -4 29.59 5.54
 -6 7 3 -1.06 1.68
 6 -7 -3 0.21 1.07
 6 7 -3 0.32 0.83
 6 -7 -3 -0.33 1.31
 -6 7 2 47.16 6.45
 -6 7 2 57.2 5.9
 -6 -7 2 61.82 6.64
 6 -7 -2 59.23 6.87
 6 7 -2 53.65 5.92
 6 -7 -2 57.38 7.24
 -6 7 1 11.17 3.16
 -6 7 1 10.93 2.67
 -6 -7 1 15.94 3.55
 -6 7 0 96.45 7.32
 -6 -7 0 103.07 8.54
 -6 7 0 92.35 8.98
 -6 -7 -1 51.86 3.94
 -6 7 -1 83.71 8.53
 -6 7 -2 127.72 10.67
 -6 7 -3 16.69 3.33
 -6 -7 -3 15.34 3.47
 -6 7 -3 14.24 3.68
 -6 7 -4 72.01 7.39
 -6 -7 -4 77.2 8.53
 -6 7 -4 69.98 8.22
 -6 7 -5 51.69 7.35
 -6 -7 -5 53.85 7.41
 -6 7 -5 50.06 6.4
 -6 -7 -6 16.01 4.33
 -6 7 -6 12.56 3.91
 -6 7 -6 11.33 3.11
 -6 7 -7 -0.59 0.89
 -6 -7 -7 -0.25 0.87
 -6 7 -8 1.63 1.81
 -6 -7 -8 0.01 0.82
 -6 7 -9 10.62 3.42
 -6 -7 -9 8.89 3.75
 -6 7 -10 2.58 1.17
 -6 -7 -10 3.96 2.6
 -6 7 -11 -0.58 1.24
 -6 -7 -11 2.3 2.29
 6 7 11 -0.23 0.89
 6 -7 11 -0.98 1.91
 -6 7 -12 0.46 1.4
 -6 -7 -12 0 1.76
 6 7 12 -1.09 1.6
 6 -7 12 2.91 2.98
 -6 7 -13 -3.07 2.41
 -6 -7 -13 -0.44 1.12
 6 -7 13 -3.65 2.95
 6 7 13 3.51 3.67
 6 -8 -12 3.43 3.32
 6 -8 -11 43.14 8.49
 6 -8 -10 -0.05 1.3
 6 -8 -9 18.03 4.96
 6 -8 -8 18.76 4.86
 -6 8 8 19.25 5.1
 6 -8 -7 0.01 2.23
 -6 8 7 -1.99 2.06
 6 -8 -6 22.71 5.4
 -6 8 6 17.76 4.65
 -6 8 5 19.66 4.96
 6 8 -5 16.29 3.62
 6 -8 -5 19.78 4.85
 -6 8 4 42.11 6.67
 6 -8 -4 41.4 5.91
 6 8 -4 46.67 5.89
 6 -8 -4 44.15 6.94
 -6 8 3 20.96 4.41
 -6 -8 3 26.58 5.03
 6 -8 -3 29.74 4.76
 6 8 -3 25.02 4.01
 6 -8 -3 25.86 5.03
 -6 8 2 32.35 5.65
 -6 8 2 38.15 4.67
 -6 -8 2 36.31 4.83
 6 -8 -2 41.18 5.69
 6 8 -2 41.06 5.13
 6 -8 -2 37.18 5.7
 -6 8 1 9.99 3.38
 -6 8 1 8.09 1.9
 -6 -8 1 7.04 1.89
 -6 8 0 4.75 2.41
 -6 8 0 5.04 1.46
 -6 -8 0 5.78 1.89
 -6 8 -1 0.8 1.05
 -6 8 -1 2.01 1.2
 -6 8 -2 0.54 1.11
 -6 8 -3 1.1 1.87
 -6 8 -4 28.78 5.32
 -6 8 -4 33.84 4.93
 -6 -8 -4 37.12 5.78
 -6 8 -5 2.47 1.33
 -6 8 -5 1.62 1.06
 -6 -8 -5 1.13 1.42
 -6 8 -6 0.32 1.18
 -6 8 -6 0.05 1.06
 -6 -8 -6 1.55 1.21
 -6 8 -7 1.16 1.29
 -6 8 -7 -0.22 1.69
 -6 -8 -7 0.72 2.19
 -6 8 -8 -1.26 1.32
 -6 -8 -8 1.52 1.9
 -6 8 -9 24.06 5.58
 -6 -8 -9 31.06 6.75
 -6 8 -10 0.2 0.7
 -6 -8 -10 1.72 2.44
 -6 8 -11 0.74 1.62
 -6 -8 -11 1.25 2.17
 6 8 11 1.41 1.5
 -6 8 -12 -0.63 0.92
 -6 -8 -12 -1.67 1.83
 6 -8 12 2.02 2.44
 6 8 12 2.27 2.09
 6 -9 -11 3.15 2.65
 6 -9 -10 3.38 2.8
 6 -9 -9 17.5 4.5
 6 -9 -8 4.66 3.06
 -6 9 8 2.41 2.02
 6 -9 -7 22.96 5.33
 -6 9 7 32.08 6.37
 -6 -9 6 -2.05 2.13
 6 -9 -6 0.36 2.59
 -6 9 6 1.03 1.67
 -6 9 5 6.78 3.01
 6 -9 -5 9.55 3.44
 -6 -9 5 5.65 2.22
 6 -9 -5 6.63 2.37
 6 9 -5 6.15 2.3
 -6 9 4 4.85 2.44
 6 -9 -4 4.44 1.83
 6 9 -4 4.49 1.71
 -6 -9 4 8.02 2.66
 6 -9 -4 2.32 1.72
 -6 9 3 42.12 6.52
 6 -9 -3 48.16 6.1
 6 9 -3 39.76 5
 -6 -9 3 45.39 6.83
 6 -9 -3 38.08 6.31
 -6 -9 2 62.43 6.72
 -6 -9 2 54.68 7.51
 6 -9 -2 53.15 7.11
 -6 9 2 52.47 7.53
 -6 9 1 1.08 1.56
 -6 9 1 0.83 0.87
 -6 -9 1 2.61 1.83
 -6 -9 1 2.61 2
 -6 9 0 6.61 2.93
 -6 9 0 7.64 1.9
 -6 -9 0 12.91 3.45
 -6 -9 0 9.75 3.16
 -6 9 -1 29.05 5.48
 -6 9 -1 23.69 3.6
 -6 -9 -1 23.47 3.97
 -6 9 -2 124.18 11.18
 -6 9 -3 30.24 5.64
 -6 9 -4 2.92 0.69
 -6 -9 -4 4.92 2.39
 -6 9 -4 0.08 1.36
 -6 9 -5 4.03 2.97
 -6 9 -5 1.66 1.33
 -6 -9 -5 0.1 1.79
 -6 -9 -6 0.37 0.92
 -6 9 -6 3.13 1.79
 -6 9 -7 4.02 2.65
 -6 9 -7 7.18 2.93
 -6 -9 -7 6.15 2.55
 -6 9 -8 16.25 4.13
 -6 9 -8 17.81 4.87
 -6 -9 -8 16.59 4.58
 -6 9 -9 8.08 3.54
 -6 9 -9 3.18 1.7
 -6 -9 -9 6.21 3.32
 6 -9 10 1.49 1.72
 6 9 10 1.54 1.65
 -6 9 -10 2.13 2.09
 -6 -9 -10 -0.31 1.12
 -6 -9 -11 0.78 1.92
 6 -9 11 0.86 0.55
 6 9 11 -2.27 2.06
 -6 9 -11 0.2 0.75
 -6 9 -12 1.37 2.62
 -6 -9 -12 0.02 0.73
 6 9 12 -1.72 1.8
 6 -9 12 -0.03 1.25
 6 -10 -11 2.26 2.53
 6 -10 -10 8.84 4.3
 6 -10 -9 9.6 4.1
 6 -10 -8 -0.68 1.62
 -6 10 8 -0.41 0.59
 -6 -10 7 -0.49 1.5
 6 -10 -7 1.98 2.26
 -6 10 7 1.01 0.96
 6 -10 -6 0.02 0.79
 6 10 -6 -0.29 0.8
 6 -10 -6 -1.73 1.97
 -6 10 6 -0.34 1.29
 -6 10 5 14.15 4.27
 6 -10 -5 15.36 4.02
 6 10 -5 12.12 2.96
 -6 -10 5 16.29 4.3
 6 -10 -5 9.59 3.02
 -6 10 4 8.07 2.89
 6 -10 -4 12.55 3.26
 6 10 -4 11.8 2.77
 -6 -10 4 9.14 2.97
 6 -10 -4 8.59 2.93
 -6 10 3 1.28 1.46
 -6 -10 3 2.41 1.76
 6 -10 -3 0.35 0.84
 6 10 -3 -0.7 0.62
 6 -10 -3 -2.29 2.6
 -6 10 2 23.67 5.14
 -6 -10 2 31.28 6.03
 6 -10 -2 30.54 5.56
 -6 10 1 -1.52 1.78
 -6 10 1 0.05 0.73
 -6 -10 1 -1.4 1.45
 -6 -10 1 1.64 1.71
 -6 10 0 17.95 4.42
 -6 10 0 20.14 3.3
 -6 -10 0 21.09 3.96
 -6 -10 0 24 5.49
 -6 10 -1 13.18 3.72
 -6 -10 -1 13.73 4.26
 -6 10 -1 13.99 2.84
 -6 -10 -1 15.61 3.44
 -6 10 -2 -1.55 1.7
 -6 10 -2 1.16 1.12
 -6 10 -3 10.12 3.35
 -6 10 -4 2.44 2
 -6 10 -5 6.18 2.27
 -6 10 -5 5.8 2.86
 -6 -10 -5 5.52 2.44
 -6 10 -6 6.92 2.83
 -6 10 -6 11.61 3.28
 -6 10 -7 2.02 1.74
 -6 -10 -7 1.94 1.5
 -6 10 -7 1.48 1.78
 -6 10 -8 0.65 0.52
 -6 -10 -8 -0.73 1.4
 6 -10 9 -0.53 1.54
 -6 10 -9 -0.59 1.25
 -6 -10 -9 -0.07 2.03
 -6 10 -10 7.05 3.57
 6 10 10 5.74 2.82
 6 -11 -10 -0.06 0.72
 6 -11 -9 3.93 3.07
 6 -11 -8 0.1 0.88
 -6 11 8 5.08 2.88
 -6 -11 7 12.55 3.46
 6 -11 -7 6.34 3
 -6 11 7 17.08 4.95
 -6 -11 6 -1.09 1.87
 -6 11 6 -0.98 0.65
 -6 11 5 4.74 2.61
 -6 -11 5 2.92 2.01
 6 -11 -5 3.79 2.04
 -6 11 4 3.04 1.58
 -6 -11 4 6.35 2.92
 6 -11 -4 2.33 1.54
 -6 11 3 33.57 6.2
 -6 -11 3 40.97 6.96
 6 -11 -3 29.79 5.9
 -6 11 2 -0.25 0.71
 -6 -11 2 -0.12 0.79
 6 -11 -2 -2.33 2.36
 -6 11 1 3.38 2.08
 -6 -11 1 11.44 3.7
 -6 11 0 31.88 6.04
 -6 -11 0 38.08 6.97
 -6 11 -1 15.94 4.2
 -6 -11 -1 11.83 3.92
 -6 -11 -2 71.84 9.59
 -6 11 -2 60.01 8.38
 -6 11 -3 5.69 2.53
 -6 11 -4 3.05 1.71
 -6 11 -5 16.29 4.42
 -6 11 -6 -0.57 1.34
 -6 11 -7 1.73 0.71
 -6 11 -8 -2.02 2.47
 -6 11 -9 -0.84 1.68
 -6 11 -10 0.58 1.53
 6 -12 -10 -10.89 4.45
 6 -12 -9 -4.64 2.84
 6 -12 -8 -1.39 1.79
 -6 12 8 2.46 2.48
 -6 -12 7 -0.92 1.64
 6 -12 -7 3.05 2.32
 -6 12 7 2.69 2.35
 -6 -12 6 3.88 1.78
 6 -12 -6 2.63 2.39
 -6 12 6 4.67 2.43
 -6 12 5 1.65 0.74
 6 -12 -5 0.32 0.67
 -6 12 4 2.5 2.18
 -6 -12 4 1.09 1.81
 6 -12 -4 -0.18 1.67
 -6 12 3 12.08 3.8
 -6 -12 3 12.5 4.16
 6 -12 -3 16.61 4.53
 -6 12 2 5.04 2.23
 -6 -12 2 8.4 3.58
 -6 12 1 23.24 5.34
 -6 -12 1 24.49 5.8
 -6 12 0 0.45 1.32
 -6 -12 0 1.4 1.57
 -6 12 -1 -1.01 1.29
 -6 -12 -1 1.29 2.18
 -6 12 -2 0.47 0.57
 -6 -12 -2 -1.6 1.6
 -6 12 -3 6.02 2.89
 -6 -12 -3 8.81 2.87
 -6 12 -4 1.56 1.67
 -6 12 -5 -0.69 1.17
 -6 12 -6 2.15 1.54
 -6 12 -7 2.32 2.07
 -6 12 -8 5.66 3.13
 -6 12 -9 2.3 2.3
 6 -13 -9 3.39 3.56
 6 -13 -8 1.77 1.99
 -6 13 8 1.75 2.01
 6 -13 -7 1.73 1.81
 -6 -13 7 0.16 0.66
 -6 13 7 1.65 1.98
 -6 -13 6 5.41 3
 6 -13 -6 1.69 1.99
 -6 13 6 -2.74 2.33
 -6 -13 5 1.69 1.77
 6 -13 -5 -0.49 1.6
 -6 13 5 -1.44 2.21
 -6 13 4 3.67 2.21
 -6 -13 4 2.59 2.01
 6 -13 -4 0.25 0.71
 -6 13 3 -1.14 1.57
 -6 -13 3 -1.23 1.37
 6 -13 -3 2.34 2.25
 -6 13 2 1.36 1.43
 -6 -13 2 0.88 2.02
 -6 13 1 2.43 1.78
 -6 -13 1 4.82 2.19
 -6 13 0 4.67 2.14
 -6 -13 0 5.98 3.71
 -6 13 -1 2.11 1.86
 -6 -13 -1 1.53 2.57
 -6 13 -2 4.88 2.51
 -6 -13 -2 5.77 2.99
 -6 13 -3 0.12 0.73
 -6 -13 -3 0.88 2
 -6 13 -4 4.02 2.55
 -6 13 -5 -0.43 1.4
 -6 13 -6 1.05 0.96
 -6 13 -7 -0.09 0.9
 -6 13 -8 3.68 2.89
 6 -14 -9 0 0.99
 6 -14 -8 1.24 1.67
 6 -14 -7 1.3 1.51
 -6 -14 7 -1.2 1.87
 -6 14 7 -0.56 1.47
 -6 -14 6 3.65 2.46
 -6 14 6 7.6 3.71
 6 -14 -6 3.13 2.21
 -6 -14 5 -1.8 2.14
 6 -14 -5 1.32 1.83
 -6 14 5 0.18 1.16
 -6 14 4 1.76 2.07
 -6 -14 4 2.05 1.22
 -6 14 3 5.83 2.89
 -6 -14 3 10.35 3.72
 -6 14 2 2.09 1.6
 -6 -14 2 1.94 1.97
 -6 14 1 7.62 3.13
 -6 -14 1 13.35 4.65
 -6 14 0 6.3 2.86
 -6 -14 0 9.35 3.9
 -6 14 -1 6.18 3.09
 -6 -14 -1 2.13 1.76
 -6 14 -2 -0.35 1.43
 -6 -14 -2 3.37 3.29
 -6 14 -3 -0.49 0.84
 -6 -14 -3 2.21 2.31
 -6 14 -4 0.7 0.46
 -6 14 -5 3.54 2.62
 -6 14 -6 3.47 2.75
 -6 14 -7 2.32 2.52
 -6 -15 7 1.53 2.14
 -6 -15 6 3 2.47
 -6 -15 5 4.67 2.96
 -6 15 5 9.25 4.41
 -6 15 4 5.58 3.18
 -6 -15 4 7.93 3.84
 -6 15 3 -0.26 1.6
 -6 -15 3 -3.67 3.08
 -6 15 2 9.79 3.76
 -6 -15 2 19.77 5.81
 -6 15 1 4.36 2.36
 -6 -15 1 15.92 5.19
 -6 15 0 0.22 0.54
 -6 -15 0 2.65 2.8
 -6 15 -1 0 0.65
 -6 -15 -1 -5.16 3.11
 -6 15 -2 -2.02 1.86
 -6 -15 -2 -0.12 1.33
 -6 15 -3 -1.23 1.41
 -6 -15 -3 -0.01 2
 -6 15 -4 -2.82 2.17
 -6 15 -5 2.83 2.29
 -6 15 -6 0.97 1.73
 -6 -16 6 -0.01 0.93
 -6 -16 5 -0.98 1.46
 -6 -16 4 2.73 3.12
 -6 16 3 -3.06 2.41
 -6 -16 3 0 1.31
 -6 16 2 0.45 1.09
 -6 -16 2 -2.74 2.41
 -6 16 1 -1.61 1.59
 -6 -16 1 0.57 1.3
 -6 16 0 1.28 1.51
 -6 -16 0 5.46 3.44
 -6 16 -1 0.34 1.18
 -6 -16 -1 2.9 2.98
 -6 16 -2 0.09 1.14
 -6 16 -3 -0.17 0.67
 -6 16 -4 -2.9 2.21
 7 0 -14 -2.6 2.14
 7 0 -13 10.38 4.25
 7 0 -12 -2.08 1.84
 7 0 -11 6.32 2.98
 7 0 -10 -0.07 2.08
 7 0 -9 0.01 1.47
 7 0 -8 -1.11 1.83
 7 0 -7 -1.8 2.17
 7 0 -6 0.69 1.33
 7 0 -5 23.62 4.55
 -7 0 5 26.95 4.17
 -7 0 4 -0.01 0.49
 -7 0 4 -2.31 2.32
 7 0 -4 -0.59 1.49
 -7 0 3 10.48 2.45
 7 0 -3 12.42 3.33
 -7 0 3 10.3 2.69
 -7 0 2 1.02 0.94
 7 0 -2 -1.24 1.76
 -7 0 2 -1.71 2.02
 -7 0 1 2.17 0.75
 7 0 -1 1.1 1.15
 -7 0 1 2.34 1.37
 -7 0 0 -1.12 0.84
 -7 0 -1 67.91 6.31
 -7 0 -2 -1.82 1.94
 -7 0 -3 69.83 7.95
 -7 0 -4 1.44 1.84
 -7 0 -5 22.85 4.96
 -7 0 -6 0.63 1.35
 -7 0 -7 11.91 3.89
 -7 0 -8 0.96 1.09
 -7 0 -9 2.34 1.76
 -7 0 -10 0.66 1.73
 -7 0 -11 8.75 3.66
 -7 0 -12 0.99 1.39
 7 -1 -14 5.55 3.68
 7 1 -14 10.15 4.25
 7 -1 -13 5.08 3.3
 7 1 -13 3.05 2.99
 7 -1 -12 63.69 9.96
 7 1 -12 58 9.19
 7 -1 -11 1.5 1.48
 7 1 -11 0.79 1.89
 7 1 -10 36.79 6.85
 7 -1 -10 32.8 6.82
 7 -1 -9 39.03 7.25
 7 1 -9 40.28 6.82
 7 -1 -8 35.3 6.26
 7 1 -8 39.91 6.7
 7 -1 -7 0.98 1.51
 7 1 -7 -0.59 1.66
 7 1 -6 5.15 2.11
 7 -1 -6 5.18 2.51
 -7 1 6 4.46 2.05
 7 -1 -5 52.33 6.99
 7 1 -5 48.57 6.44
 -7 -1 5 47.95 5.34
 -7 1 5 53.69 6.35
 -7 1 4 16.21 3.11
 -7 1 4 18.17 3.91
 -7 -1 4 12.76 3.12
 7 -1 -4 15.96 3.48
 -7 -1 4 18.2 3.24
 -7 1 3 42.53 5.9
 -7 -1 3 42.08 5.87
 7 -1 -3 46.46 6.09
 7 1 -3 37.7 5.33
 -7 -1 3 40.74 4.45
 -7 1 3 42.21 5.12
 -7 -1 2 1.63 0.97
 -7 1 2 1.9 0.6
 7 -1 -2 2.51 1.37
 7 1 -2 1.87 1.53
 -7 1 2 3.36 1.9
 -7 -1 2 2.16 1.48
 7 -1 -1 44.54 5.79
 7 1 -1 38.68 5.42
 -7 1 1 36.09 5.08
 -7 -1 1 37.97 5.32
 -7 1 1 39.84 4.81
 -7 -1 1 35.08 4.3
 -7 1 0 64.27 6.11
 -7 -1 0 51.53 5.16
 -7 1 -1 30.75 4.31
 -7 -1 -1 30.17 3.92
 -7 1 -2 101.54 9.23
 -7 -1 -2 104.07 9.59
 -7 1 -2 93.8 7.99
 -7 1 -3 267.2 15.63
 -7 -1 -3 277.8 16.19
 -7 1 -4 27.31 5.37
 -7 -1 -4 25.04 5.04
 -7 1 -5 5.35 2.52
 -7 -1 -5 7 2.7
 -7 1 -6 96.53 10.24
 -7 -1 -6 100.42 10.61
 -7 1 -7 40.66 6.99
 -7 -1 -7 39.54 6.8
 -7 1 -8 46.22 7.65
 -7 -1 -8 43.77 7.55
 -7 1 -9 41.3 7.45
 -7 -1 -9 40.78 7.5
 -7 1 -10 13.05 4.64
 -7 -1 -10 10.37 3.69
 -7 1 -11 1.15 1.9
 -7 -1 -11 -4.83 2.93
 -7 1 -12 -0.98 1.45
 -7 -1 -12 1.67 2.2
 7 2 -15 -0.54 2.23
 7 -2 -14 1.09 1.68
 7 2 -14 -0.75 2.03
 7 -2 -13 1.53 1.68
 7 2 -13 3.66 2.57
 7 -2 -12 -1.77 1.79
 7 2 -12 3.89 2.78
 7 -2 -11 3.32 2.29
 7 2 -11 -0.19 1.53
 7 -2 -10 3.1 2.02
 7 2 -10 3.14 2.56
 7 -2 -9 16.5 4.6
 7 2 -9 9.65 3.07
 7 2 -8 91.13 9.67
 7 -2 -8 95.02 10.56
 7 -2 -7 2.24 1.64
 7 2 -7 6.06 2.87
 7 -2 -6 1.94 1.33
 7 2 -6 1.35 1.16
 -7 2 6 3.88 1.6
 7 -2 -5 1.87 1.35
 7 2 -5 0.64 1.05
 -7 2 5 0.93 0.84
 -7 2 4 4.06 1.69
 -7 2 4 5.49 2.37
 -7 -2 4 5.89 2.45
 7 -2 -4 3.73 2.44
 -7 -2 4 6.01 1.79
 -7 -2 3 1.7 0.51
 -7 2 3 1.18 0.83
 -7 2 3 1.76 1.41
 -7 -2 3 0.45 0.83
 7 -2 -3 3.56 1.86
 7 2 -3 1.06 1.04
 -7 -2 2 4.21 1.42
 -7 2 2 3.14 1.29
 7 -2 -2 5.42 2.28
 7 2 -2 3.3 1.36
 -7 2 2 4.15 1.38
 -7 -2 2 5.92 2.12
 -7 2 1 192.77 11.83
 -7 -2 1 201.86 12.62
 7 -2 -1 213.96 13.38
 7 2 -1 202.17 12.64
 -7 -2 1 182.89 8.61
 -7 2 1 196.33 11.29
 -7 2 0 33.91 4.65
 -7 -2 0 36.56 3.98
 -7 2 -1 8.49 2.4
 -7 -2 -1 11.27 2.68
 -7 2 -2 206.22 13.03
 -7 -2 -2 220.66 13.83
 -7 2 -2 202.13 12.23
 -7 2 -3 -0.44 1.54
 -7 -2 -3 0.35 1.03
 -7 2 -4 1.79 1.03
 -7 -2 -4 0.2 1.19
 -7 2 -5 16.92 3.99
 -7 -2 -5 19.7 4.66
 -7 -2 -6 9.64 3.52
 -7 2 -6 6.9 2.8
 -7 2 -7 11.17 3.48
 -7 -2 -7 8.29 3.2
 -7 2 -8 7.96 3.16
 -7 -2 -8 12.29 3.93
 -7 2 -9 1.25 1.59
 -7 -2 -9 0.14 0.81
 -7 2 -10 1.2 1.03
 -7 -2 -10 -0.02 1.86
 -7 2 -11 2.44 1.85
 -7 -2 -11 0.36 1.62
 -7 2 -12 2.14 1.63
 -7 -2 -12 2.01 2.77
 7 -3 -13 0.53 1.29
 7 3 -13 4.39 2.72
 7 -3 -12 3.72 2.86
 7 3 -12 -1.89 2.02
 7 -3 -11 0.89 0.81
 7 3 -11 3.03 1.65
 7 -3 -10 0.17 2.13
 7 3 -10 1.35 1.02
 7 3 -9 57.9 7.87
 7 -3 -9 51.6 8.21
 7 3 -8 16.83 4.15
 7 -3 -8 16.58 4.84
 7 -3 -7 27.41 5.76
 7 3 -7 32.53 5.6
 -7 3 7 30.41 5.58
 7 -3 -6 18.97 4.75
 7 3 -6 17.15 3.7
 -7 3 6 18.61 4.51
 -7 3 5 8.33 2.93
 7 -3 -5 5.75 1.68
 -7 3 4 3.03 1.55
 7 3 -4 1.96 0.8
 -7 3 4 3.73 1.43
 7 -3 -4 2.01 1.45
 7 3 -4 5.47 2.18
 7 -3 -4 1.52 1.09
 -7 3 3 159.53 11.23
 -7 -3 3 181.28 12.37
 7 -3 -3 174.53 12.03
 7 3 -3 160.32 11.35
 7 -3 -3 182.66 12.86
 -7 -3 3 172.61 7.55
 -7 3 3 160.71 10.94
 -7 -3 2 0.7 0.5
 -7 3 2 0.42 1.03
 -7 3 2 1.3 1.13
 7 -3 -2 1.42 1.37
 7 3 -2 -0.75 1.27
 -7 -3 2 1.76 0.8
 -7 3 1 67.65 6.97
 -7 -3 1 71.77 7.51
 7 -3 -1 70.09 7.51
 7 3 -1 70.08 7.39
 -7 -3 1 59.27 4.54
 -7 3 1 63.86 6.85
 -7 3 0 103.77 8.58
 -7 -3 0 105.65 6.47
 -7 3 -1 6.8 2.28
 -7 3 -2 67.5 7.32
 -7 3 -3 38.75 5.61
 -7 -3 -3 36.89 6.04
 -7 3 -3 34.62 5.44
 -7 3 -4 20.34 4.35
 -7 -3 -4 26.27 5.18
 -7 3 -5 53.08 7.32
 -7 -3 -5 52.09 7.41
 -7 3 -6 130.45 12.04
 -7 -3 -6 138.13 12.82
 -7 3 -7 4.99 2.54
 -7 -3 -7 4.33 1.98
 -7 3 -8 -0.98 1.39
 -7 -3 -8 -2.48 1.98
 -7 3 -9 17.15 5.19
 -7 -3 -9 13.19 4.15
 -7 3 -10 -1.95 1.4
 -7 -3 -10 0.89 1.74
 -7 3 -11 2.36 2.27
 -7 -3 -11 3.88 2.75
 -7 3 -12 3.35 2.62
 -7 -3 -12 0.23 0.73
 7 -4 -13 0.38 1.47
 7 -4 -12 5.02 3.48
 7 4 -12 0.5 0.76
 7 -4 -11 0.35 1.06
 7 4 -11 2.25 1.61
 7 -4 -10 0.97 2.43
 7 4 -10 1.71 1.4
 7 -4 -9 32.44 6.45
 7 4 -9 37.63 6.36
 7 -4 -8 24.04 5.63
 7 4 -8 26.24 5.18
 7 -4 -7 19.15 5.06
 7 4 -7 12.99 3.32
 -7 4 7 11.89 3.66
 7 -4 -6 9.1 3.07
 -7 4 6 12.91 3.59
 -7 4 5 -0.91 1.44
 7 -4 -5 -0.52 1.76
 -7 4 4 2.12 1.51
 -7 4 4 4.91 2.12
 -7 -4 4 2.71 1.21
 7 -4 -4 4.19 2.08
 7 4 -4 3.74 1.45
 7 -4 -4 5.57 2.46
 -7 4 3 0.29 1.48
 -7 4 3 2.52 1.75
 -7 -4 3 -0.84 1.17
 7 -4 -3 0.7 0.8
 7 4 -3 1.25 1.25
 7 -4 -3 -2.4 2.61
 -7 4 2 2.35 1.56
 -7 4 2 2.29 1.48
 7 -4 -2 2.23 1.53
 -7 -4 2 3.85 1.77
 7 4 -2 2.21 1.18
 -7 -4 2 3.99 0.99
 -7 4 1 66.55 6.93
 -7 -4 1 68.5 7.6
 7 -4 -1 76.73 8.07
 7 4 -1 66.95 7.12
 -7 -4 1 59.21 3.89
 -7 4 1 63.31 6.91
 -7 4 0 81.88 7.48
 -7 -4 0 87.06 8.29
 -7 4 0 82.95 7.99
 -7 -4 0 75.72 5.13
 -7 4 -1 125.04 9.89
 -7 4 -2 16.54 3.91
 -7 4 -3 6.79 2.63
 -7 -4 -3 5.93 2.28
 -7 4 -3 6 2.63
 -7 4 -4 42.59 6.1
 -7 -4 -4 45.21 6.79
 -7 4 -5 67.27 8.22
 -7 -4 -5 68.38 8.52
 -7 4 -6 -1.17 1.66
 -7 -4 -6 -0.03 1.59
 -7 4 -7 2.27 2.07
 -7 -4 -7 -0.64 1.38
 -7 4 -8 -1.58 2.32
 -7 -4 -8 -2.38 2.12
 -7 4 -9 -1.51 1.8
 -7 -4 -9 -2.26 2.56
 -7 4 -10 -0.18 1.69
 -7 -4 -10 1.35 1.25
 -7 4 -11 0.3 1.59
 -7 -4 -11 1.45 2.54
 -7 4 -12 0.98 1.72
 -7 -4 -12 -1.09 1.64
 7 -5 -13 6.94 2.97
 7 -5 -12 1.48 1.9
 7 -5 -11 2.13 1.57
 7 5 -11 6.6 3.07
 7 5 -10 16.68 3.96
 7 -5 -10 19.42 5.35
 7 -5 -9 3.72 2.89
 7 5 -9 5.4 2.63
 7 -5 -8 -4.95 3.15
 7 5 -8 2.39 1.82
 7 -5 -7 9.71 3.66
 -7 5 7 8.18 3.3
 7 -5 -6 66.97 8.63
 -7 5 6 60.43 8.32
 -7 5 5 37.14 5.97
 7 -5 -5 38.62 6.63
 -7 5 4 12.53 3.38
 7 -5 -4 15.83 3.77
 7 5 -4 15.03 3.66
 7 -5 -4 12.12 3.32
 -7 5 3 10.79 3.13
 -7 5 3 14.94 3.56
 -7 -5 3 13.6 3.43
 7 -5 -3 17.68 3.8
 7 5 -3 13.13 3.26
 7 -5 -3 11.89 3.33
 -7 5 2 60.28 6.79
 -7 -5 2 65.84 7.62
 7 -5 -2 61.61 7.18
 7 5 -2 58.22 6.66
 -7 5 2 53.76 6.86
 -7 -5 1 5.8 0.87
 -7 5 1 8.15 2.67
 7 -5 -1 6.04 2.4
 7 5 -1 8.4 2.45
 -7 5 1 6.07 2.28
 -7 -5 1 5.96 2.25
 -7 5 0 -1.24 1.71
 -7 -5 0 0.22 0.33
 -7 5 0 -1.02 1.22
 -7 -5 0 0.03 0.91
 -7 5 -1 21.92 4.28
 -7 5 -2 119.75 10.2
 -7 5 -3 -1.53 1.59
 -7 -5 -3 0.86 1.42
 -7 5 -3 -0.29 1.21
 -7 5 -4 4.45 2.2
 -7 5 -4 5.53 2.09
 -7 -5 -4 7.96 2.97
 -7 5 -5 22.66 4.76
 -7 -5 -5 23.45 5.01
 -7 5 -6 -0.71 1.36
 -7 -5 -6 0.62 1.82
 -7 5 -7 -0.12 1.62
 -7 -5 -7 -0.63 0.84
 -7 5 -8 -1.91 1.24
 -7 -5 -8 1.28 1.23
 -7 5 -9 5.42 2.48
 -7 -5 -9 4.2 2.44
 -7 5 -10 2.8 2.42
 -7 -5 -10 1.45 1.72
 -7 5 -11 -3.46 2.43
 -7 -5 -11 0.19 1.31
 -7 5 -12 7.27 3.98
 -7 -5 -12 9.69 4.72
 7 -6 -12 2.15 3.35
 7 -6 -11 2.72 2.83
 7 -6 -10 11.74 4.12
 7 -6 -9 21.02 5.4
 7 -6 -8 7.07 3.18
 -7 6 8 1.62 1.68
 7 -6 -7 21.29 5.28
 -7 6 7 14.7 4.26
 7 -6 -6 4.47 2.96
 -7 6 6 3.58 1.66
 7 6 -5 71.53 8.16
 7 -6 -5 71.57 8.84
 -7 6 5 66.98 8.63
 -7 6 4 40.86 6.3
 7 -6 -4 51.8 6.83
 7 6 -4 45.47 6.21
 7 -6 -4 51.02 7.41
 -7 6 3 6.13 2.16
 -7 6 3 7.96 2.33
 -7 -6 3 8.67 2.76
 7 -6 -3 10.41 3.1
 7 6 -3 6.53 2.07
 7 -6 -3 11.82 3.62
 -7 6 2 27.15 4.98
 -7 6 2 31.5 4.64
 -7 -6 2 35.97 5.69
 7 -6 -2 30.49 5.04
 7 6 -2 28.11 4.59
 -7 6 1 2.65 1.49
 -7 6 1 4.98 1.7
 -7 -6 1 5.17 1.72
 -7 6 0 44.76 6.44
 -7 6 0 43.57 5.27
 -7 -6 0 53.27 6.63
 -7 -6 0 45.98 2.87
 -7 6 -1 18.7 4.05
 -7 6 -2 -2.15 1.85
 -7 6 -3 0.71 1.08
 -7 -6 -3 0.42 1.05
 -7 6 -3 0.52 1.03
 -7 6 -4 55.36 7.76
 -7 6 -4 50.62 6.72
 -7 -6 -4 55.56 7.98
 -7 6 -5 27.35 5.76
 -7 6 -5 33.01 5.7
 -7 -6 -5 34.1 6.31
 -7 6 -6 -0.98 1.16
 -7 -6 -6 -3.21 2.26
 -7 6 -7 3.92 2.33
 -7 -6 -7 3 1.81
 -7 6 -8 1.55 1.39
 -7 -6 -8 0.58 1.63
 -7 6 -9 7.33 3.18
 -7 -6 -9 9.1 3.79
 -7 6 -10 -7.24 3.31
 -7 -6 -10 2.05 2.57
 -7 6 -11 -5.94 3.14
 -7 -6 -11 0.58 1.41
 -7 6 -12 5.19 3.44
 -7 -6 -12 1.94 2.69
 7 6 12 3.19 2.43
 7 -6 12 6.31 4.52
 7 -7 -12 0.61 2.59
 7 -7 -11 2.25 1.71
 7 -7 -10 -1.47 2.16
 7 -7 -9 -1.48 1.82
 7 -7 -8 -1.88 1.93
 -7 7 8 0.27 1.25
 7 -7 -7 71.88 9.72
 -7 7 7 72.24 9.48
 7 -7 -6 106.37 11.47
 -7 7 6 107.44 11.59
 -7 7 5 2.46 2.01
 7 -7 -5 5.3 2.37
 7 7 -5 5.43 2.25
 7 -7 -5 3.1 2.13
 7 -7 -4 69.98 7.9
 7 7 -4 73.26 7.73
 7 -7 -4 74.76 9.14
 -7 7 4 69.61 8.6
 -7 7 3 54.97 6.41
 -7 -7 3 65.94 7.47
 7 -7 -3 53.76 6.69
 7 7 -3 55.15 6.51
 7 -7 -3 49.74 7.7
 -7 7 3 45.8 6.69
 -7 7 2 0.41 0.88
 -7 7 2 2.66 1.47
 -7 -7 2 -1.19 1.12
 7 -7 -2 0.45 1.12
 7 7 -2 1.98 1.73
 -7 7 1 0.66 1.28
 -7 7 1 0.76 0.58
 -7 -7 1 -0.14 1.62
 -7 7 0 23 4.89
 -7 7 0 18.41 3.48
 -7 -7 0 24.72 4.44
 -7 7 -1 16.27 4.13
 -7 7 -2 19.12 4.44
 -7 7 -3 -1.35 1.93
 -7 7 -4 4.47 1.99
 -7 -7 -4 1.7 1.31
 -7 7 -4 3.96 2.2
 -7 7 -5 36.41 6.62
 -7 7 -5 36.84 5.89
 -7 -7 -5 44.94 6.97
 -7 7 -6 9.67 3.61
 -7 7 -6 12.1 3.44
 -7 -7 -6 14.87 4.07
 -7 7 -7 4.71 2.94
 -7 7 -7 3.71 2.19
 -7 -7 -7 4.08 2.48
 -7 7 -8 0.55 0.68
 -7 -7 -8 -0.84 1.61
 -7 7 -9 10.73 3.72
 -7 -7 -9 25.23 6.19
 -7 7 -10 -2.52 1.97
 -7 -7 -10 -6.19 3.29
 -7 7 -11 -0.9 1.27
 -7 -7 -11 4.84 3.7
 -7 -7 -12 -1.96 2.01
 7 7 12 -3.54 2.91
 7 -7 12 -2.16 2.27
 -7 7 -12 -2.47 2.17
 7 -8 -11 0.77 1.18
 7 -8 -10 1.06 1.65
 7 -8 -9 3.44 2.27
 7 -8 -8 29.24 6.05
 -7 8 8 27.94 6.35
 7 -8 -7 -3.22 2.7
 -7 8 7 -1.06 1.02
 7 8 -6 -1.36 1.59
 7 -8 -6 0.01 1.54
 -7 8 6 2.64 2
 -7 8 5 36.56 6.68
 7 -8 -5 38.03 5.96
 7 8 -5 38.62 5.88
 7 -8 -5 37.07 6.8
 7 -8 -4 113.11 10.29
 7 8 -4 121.71 9.72
 7 -8 -4 114.62 11.44
 -7 8 4 114.24 11.04
 7 -8 -3 88.13 8.88
 7 8 -3 94.18 8.48
 7 -8 -3 82.61 9.04
 -7 8 3 76.44 8.89
 -7 8 2 3.16 2.37
 -7 8 2 3.68 1.37
 -7 -8 2 4.5 1.84
 7 -8 -2 5.22 2.2
 7 8 -2 7.78 2.59
 -7 8 1 15.78 4.06
 -7 8 1 17.28 3.62
 -7 -8 1 13.85 3.22
 -7 8 0 15.61 3.88
 -7 8 0 22.05 3.86
 -7 -8 0 19.4 3.71
 -7 8 -1 23.76 4.81
 -7 8 -1 26.72 4.12
 -7 -8 -1 32.23 5.04
 -7 8 -2 0.38 1.04
 -7 8 -3 2.77 1.48
 -7 8 -4 10.52 2.94
 -7 -8 -4 16.59 4.38
 -7 8 -4 10.68 3.6
 -7 8 -5 3.48 1.39
 -7 8 -5 5.52 2.34
 -7 -8 -5 7.38 3.18
 -7 8 -6 -0.75 1.44
 -7 -8 -6 -1.08 0.87
 -7 8 -7 1.55 1.82
 -7 8 -7 -0.26 0.89
 -7 -8 -7 1.91 2.21
 -7 8 -8 -1.75 0.97
 -7 -8 -8 -4.3 2.44
 -7 8 -9 3.29 2.26
 -7 -8 -9 1.64 2.55
 -7 8 -10 0.14 0.44
 -7 -8 -10 0.83 1.5
 -7 8 -11 1.29 1.74
 -7 -8 -11 -0.05 1.32
 7 -8 12 -1.34 2.29
 7 8 12 4.38 2.94
 -7 8 -12 0.7 1.79
 -7 -8 -12 3.8 2.8
 7 -9 -11 10.2 4.62
 7 -9 -10 11.16 4.83
 7 -9 -9 5.39 2.96
 7 -9 -8 12.1 3.87
 -7 9 8 13.15 4.52
 7 -9 -7 3.98 2.59
 -7 9 7 3.75 2.75
 7 -9 -6 7.02 2.61
 7 9 -6 6.91 2.59
 7 -9 -6 5.06 2.04
 -7 9 6 10.64 3.75
 -7 9 5 33.39 6.48
 7 -9 -5 28.11 5.42
 7 9 -5 34.2 5.35
 7 -9 -5 30.49 5.86
 -7 9 4 50.94 7.63
 7 -9 -4 53.51 7.07
 7 9 -4 62.76 7.15
 7 -9 -4 65.51 8.53
 -7 9 3 28.62 5.54
 7 9 -3 32.49 5.11
 7 -9 -3 27.16 4.87
 7 -9 -3 31.51 5.88
 -7 9 2 4.46 2.13
 -7 9 2 6.74 2.04
 -7 -9 2 6.35 2.34
 -7 9 1 24.66 5.34
 -7 9 1 25.04 3.92
 -7 -9 1 27.13 4.83
 -7 9 0 8.79 3.18
 -7 9 0 14.45 3
 -7 -9 0 12.88 3.26
 -7 9 -1 20.51 4.7
 -7 9 -1 20.87 3.54
 -7 -9 -1 27.44 4.77
 -7 9 -2 63.39 8.46
 -7 9 -3 83.81 9.66
 -7 9 -4 -0.72 1.42
 -7 9 -5 3.25 1.74
 -7 -9 -5 -0.24 1.97
 -7 9 -5 4.6 2.32
 -7 9 -6 8.16 3.1
 -7 9 -6 9.24 3
 -7 -9 -6 10.22 3.59
 -7 9 -7 1.84 1.79
 -7 9 -7 1.62 1.71
 -7 -9 -7 -2.92 2.15
 -7 9 -8 19.94 5.34
 -7 9 -8 13.36 4.24
 -7 -9 -8 15.99 4.53
 -7 9 -9 12.48 4.35
 -7 9 -9 3.45 2.02
 -7 -9 -9 10.66 4.39
 -7 9 -10 2.6 1.89
 -7 9 -10 1.7 1.98
 -7 -9 -10 1.09 1.29
 7 -9 11 3.94 2.61
 7 9 11 1.09 1.84
 -7 9 -11 1 1.93
 -7 -9 -11 0 1.07
 7 -9 12 0.07 1.41
 7 9 12 -0.71 1.95
 -7 9 -12 -2.82 2.23
 -7 -9 -12 -3.5 2.71
 7 -10 -10 -2.17 2.07
 7 -10 -9 -0.15 2.78
 7 -10 -8 0.16 1.6
 -7 10 8 7.48 3.77
 7 -10 -7 0.07 0.47
 7 10 -7 0.16 0.76
 7 -10 -7 -0.95 1.6
 -7 10 7 -2.37 2.51
 7 -10 -6 23 5.03
 7 10 -6 30.36 5.34
 7 -10 -6 19.91 5.6
 -7 10 6 26.87 6.1
 -7 10 5 -3 2.85
 7 -10 -5 1.13 1.21
 7 10 -5 -0.25 0.99
 7 -10 -5 3.76 2.94
 -7 10 4 -2.85 2.11
 7 -10 -4 0.58 1.1
 7 10 -4 -0.3 0.67
 7 -10 -4 -1.22 2
 -7 10 3 12.82 3.69
 7 -10 -3 18.39 4.22
 7 10 -3 13.56 3.1
 7 -10 -3 17.64 4.81
 -7 10 2 -2.04 2.47
 -7 10 1 4.67 2.57
 -7 10 1 5.57 2.07
 -7 -10 1 6.71 2.26
 -7 10 0 15.67 4.36
 -7 10 0 18.04 3.49
 -7 -10 0 21.99 4.4
 -7 10 -1 -0.89 0.92
 -7 10 -1 1.04 1.17
 -7 -10 -1 0.87 1.63
 -7 10 -2 17.76 4.68
 -7 10 -2 18.11 3.19
 -7 -10 -2 22.04 4.3
 -7 10 -3 3.07 1.92
 -7 10 -4 -1.03 1.08
 -7 10 -5 0.58 0.96
 -7 -10 -5 0.24 1.48
 -7 10 -5 -3.39 2.76
 -7 10 -6 0.98 0.93
 -7 10 -6 -0.09 0.98
 -7 -10 -6 -0.12 0.57
 -7 10 -7 2.11 2.02
 -7 10 -7 -0.64 1.16
 -7 -10 -7 0.34 0.99
 -7 10 -8 3.23 2.67
 -7 -10 -8 0.05 0.92
 -7 10 -9 -2.56 2.6
 -7 -10 -9 1.07 1.23
 -7 10 -10 0.27 1.04
 7 -11 -10 -2.04 2.05
 7 -11 -9 7.27 4.39
 7 -11 -8 14.84 4.98
 -7 11 8 41.16 8.17
 7 -11 -7 0.8 1.35
 -7 11 7 0.04 0.72
 7 -11 -6 -0.27 1.49
 -7 11 6 3.98 2.6
 -7 11 5 3.43 2.16
 7 -11 -5 -2.55 2.62
 -7 11 4 0.13 1.4
 7 -11 -4 -0.97 1.25
 -7 11 3 4.2 2.28
 7 -11 -3 5.97 2.87
 -7 11 2 20.97 4.84
 -7 11 1 -0.85 1.48
 -7 11 0 18.01 4.59
 -7 11 -1 0.84 1.51
 -7 11 -2 8.99 3.39
 -7 11 -3 6.07 2.7
 -7 11 -4 2.26 1.71
 -7 11 -5 2.31 1.59
 -7 11 -6 0.89 1.61
 -7 11 -7 -0.89 1.37
 -7 11 -8 17.5 5.36
 -7 11 -9 1.91 2.3
 7 -12 -9 7.43 4.64
 7 -12 -8 1.4 2.14
 -7 12 8 7.03 3.54
 7 -12 -7 -2.09 2.59
 -7 12 7 1.46 1.01
 7 -12 -6 -3.95 3.09
 -7 12 6 5.3 3.31
 -7 12 5 0.37 0.79
 7 -12 -5 -0.76 1.36
 -7 12 4 0.95 1.73
 -7 -12 4 -1.24 2
 7 -12 -4 -3.76 3.13
 -7 12 3 11.66 3.99
 -7 -12 3 11.64 4.17
 -7 12 2 1.97 0.75
 -7 -12 2 -0.08 1.65
 -7 12 1 25.3 5.6
 -7 12 0 1.7 1.13
 -7 12 -1 8.19 3.45
 -7 12 -2 1.74 1.44
 -7 12 -3 10.73 3.66
 -7 12 -4 8.39 3.46
 -7 12 -5 2.79 1.87
 -7 12 -6 4.09 2.67
 -7 12 -7 2.67 1.8
 -7 12 -8 5.12 3.3
 7 -13 -9 3.86 2.73
 7 -13 -8 -6.75 3.49
 7 -13 -7 0.18 1.38
 -7 13 7 4.05 2.55
 7 -13 -6 8.76 4.13
 -7 13 6 10.76 4.38
 -7 13 5 -0.1 0.76
 -7 -13 5 1.01 1.05
 -7 13 4 -1.4 1.6
 -7 -13 4 5.44 2.62
 7 -13 -4 5.92 3.54
 -7 13 3 3.36 2.06
 -7 -13 3 5.35 2.92
 -7 13 2 26.12 5.77
 -7 -13 2 29.68 6.51
 -7 13 1 20.11 4.99
 -7 -13 1 26.08 6.23
 -7 13 0 7.48 3.09
 -7 13 -1 -2.1 2.49
 -7 13 -2 -1.12 1.32
 -7 13 -3 -0.36 1.17
 -7 13 -4 0.71 1.53
 -7 13 -5 0.88 1.88
 -7 13 -6 -1.56 1.61
 -7 13 -7 -4.03 2.78
 7 -14 -8 0 1.36
 7 -14 -7 -2.89 2.73
 -7 -14 6 -0.09 0.56
 7 -14 -6 -0.33 0.9
 -7 14 6 -3.09 2.8
 -7 -14 5 -0.51 1.01
 7 -14 -5 0.67 1.4
 -7 14 5 1.68 1.38
 -7 14 4 4.59 2.42
 -7 -14 4 11.83 4.64
 -7 14 3 4.09 2.27
 -7 -14 3 -0.72 1.36
 -7 14 2 1.73 1.56
 -7 -14 2 -3.18 2.45
 -7 14 1 22.99 5.8
 -7 -14 1 27.95 6.75
 -7 14 0 17.98 5.11
 -7 -14 0 21.13 6.06
 -7 14 -1 3.86 2.19
 -7 14 -2 3.84 2.82
 -7 14 -3 3.28 2.12
 -7 14 -4 2.49 2.06
 -7 14 -5 3.88 2.83
 -7 14 -6 1.25 1.54
 -7 -15 6 3.13 2.62
 -7 -15 5 1.22 1.88
 -7 15 4 0.39 0.66
 -7 -15 4 0.53 2.22
 -7 15 3 5.83 3.26
 -7 -15 3 3.63 2.74
 -7 15 2 -3.4 2.33
 -7 -15 2 2.08 1.43
 -7 15 1 9.82 3.76
 -7 -15 1 20.05 5.91
 -7 15 0 0.88 1.69
 -7 -15 0 -0.61 1.42
 -7 15 -1 0.15 0.65
 -7 15 -2 -2.29 1.94
 -7 15 -3 0.06 1.29
 -7 15 -4 0.18 1.33
 8 0 -13 -2.15 2.25
 8 0 -12 9.34 3.58
 8 0 -11 4.16 2.55
 8 0 -10 2.14 1.64
 8 0 -9 2.78 2.59
 8 0 -8 -1.06 2.12
 8 0 -7 -2.25 1.86
 8 0 -6 45.82 7.07
 -8 0 6 41.99 5.71
 8 0 -5 -1.18 1.53
 -8 0 5 1.54 1.43
 -8 0 4 33.66 4.68
 -8 0 4 38.57 6.62
 8 0 -4 39.64 6.42
 -8 0 3 -0.22 0.58
 -8 0 3 0.4 1.93
 -8 0 2 21.05 3.66
 8 0 -2 18.58 4.05
 -8 0 2 18.62 4.11
 -8 0 1 0.51 0.93
 8 0 -1 0.87 1.38
 -8 0 1 -0.79 1.52
 -8 0 0 3.74 1.52
 -8 0 -1 -0.17 1.01
 -8 0 -2 169.95 11.33
 -8 0 -3 0.52 1.45
 -8 0 -4 41.99 6.9
 -8 0 -5 2.61 2.06
 -8 0 -6 -0.23 1.4
 -8 0 -7 3.46 2.81
 -8 0 -8 38.53 7.6
 -8 0 -9 2.27 2.43
 -8 0 -10 8.84 3.63
 -8 0 -11 5.91 3.76
 -8 0 -12 -7.57 3.9
 8 1 -14 4.57 3.35
 8 -1 -13 -10.48 4.49
 8 1 -13 2.17 2.28
 8 -1 -12 -2.24 2.19
 8 1 -12 -1.62 2.05
 8 -1 -11 21.22 5.66
 8 1 -11 20.04 5.32
 8 -1 -10 -0.12 2.2
 8 1 -10 -0.64 1.42
 8 1 -9 4.09 2.26
 8 -1 -9 5.15 3.25
 8 -1 -8 6.6 2.71
 8 1 -8 4.68 2.27
 8 -1 -7 -0.72 1.77
 8 1 -7 -2.81 2.88
 8 -1 -6 3.17 2.25
 8 1 -6 1.52 2.22
 -8 1 6 0.16 0.92
 8 -1 -5 217.13 14.9
 -8 -1 5 202.93 11.72
 -8 1 5 224.3 13.81
 -8 1 4 266.85 16.59
 -8 -1 4 275.22 17.02
 8 -1 -4 276.89 16.6
 8 1 -4 271.81 16.53
 -8 -1 4 283.92 13.63
 -8 1 4 280.35 14.43
 -8 1 3 26.15 4.2
 -8 1 3 29.25 5.24
 -8 -1 3 31.89 5.64
 8 -1 -3 27.83 5.26
 8 1 -3 27.71 5.21
 -8 -1 3 28.27 4.1
 -8 1 2 108.42 10.26
 -8 -1 2 97.47 9.59
 8 -1 -2 91.99 9.3
 8 1 -2 89.6 9.11
 -8 -1 2 89.08 7.21
 -8 1 2 91.01 7.87
 -8 -1 1 4.99 1.43
 -8 1 1 5.27 1.62
 8 -1 -1 4.28 1.66
 8 1 -1 7.87 2.89
 -8 1 1 5.88 2.48
 -8 -1 1 6.13 2.75
 -8 1 0 -0.28 0.64
 -8 -1 0 1.05 1.04
 -8 1 -1 36.26 5.1
 -8 -1 -1 41.71 5.22
 -8 1 -2 57.91 6.67
 -8 -1 -2 63.72 6.63
 -8 1 -3 6.45 2.38
 -8 -1 -3 10.35 3.22
 -8 1 -4 1.68 2.02
 -8 -1 -4 -0.62 1.72
 -8 1 -5 31.99 5.86
 -8 -1 -5 35.32 6.36
 -8 1 -6 35.82 6.66
 -8 -1 -6 40.75 7.07
 -8 1 -7 -2.1 1.89
 -8 -1 -7 -1.51 2
 -8 1 -8 -2.74 2.25
 -8 -1 -8 -2.17 1.24
 -8 1 -9 12.93 4.38
 -8 -1 -9 12.41 4.16
 -8 1 -10 1.7 2.98
 -8 -1 -10 2.36 1.11
 -8 1 -11 0.26 1.56
 -8 -1 -11 7.51 4
 -8 1 -12 -0.21 1
 -8 -1 -12 2.33 2.5
 8 2 -14 1.81 2.05
 8 -2 -13 4.37 3.39
 8 2 -13 5.77 3.41
 8 -2 -12 15.24 5.01
 8 2 -12 18.23 5.23
 8 -2 -11 -0.84 1.85
 8 2 -11 -2.06 2.17
 8 -2 -10 13.46 4.43
 8 2 -10 12.25 3.96
 8 -2 -9 2.81 2.16
 8 2 -9 0.16 1.05
 8 -2 -8 5.21 2.59
 8 2 -8 2.45 1.45
 8 -2 -7 20.38 5.1
 8 2 -7 22.56 5.02
 -8 2 7 23.85 5.06
 8 -2 -6 24.61 5.31
 -8 2 6 23.31 4.65
 -8 2 5 27.89 4.93
 8 2 -5 27.12 5.54
 8 -2 -5 28.94 5.63
 -8 2 4 42.48 6.5
 -8 -2 4 45.03 6.82
 8 -2 -4 38.68 6.23
 8 2 -4 40.15 6.26
 -8 -2 4 39.66 4.67
 -8 2 4 37.93 5.54
 -8 -2 3 3.01 1.35
 -8 2 3 4.19 2.27
 -8 2 3 4.4 2.51
 -8 -2 3 1.22 1.38
 8 -2 -3 3 1.72
 8 2 -3 3.47 1.9
 -8 2 2 156.03 12.21
 -8 -2 2 165.77 12.88
 8 -2 -2 151.15 11.66
 8 2 -2 154.15 11.59
 -8 -2 2 155.49 8.8
 -8 2 2 157.54 11.01
 -8 -2 1 0.46 0.43
 -8 2 1 -0.73 1.04
 8 -2 -1 -0.77 1.66
 8 2 -1 0.43 0.88
 -8 2 1 -0.43 0.76
 -8 -2 1 1.15 1.84
 -8 2 0 -0.16 0.86
 -8 -2 0 1.18 1.25
 -8 2 0 -0.84 1.38
 -8 2 -1 113.09 9.34
 -8 -2 -1 115.18 8.25
 -8 2 -2 21.54 4.2
 -8 2 -3 150.98 12.25
 -8 -2 -3 158.6 12.95
 -8 2 -3 148.2 11.62
 -8 2 -4 110.48 10.92
 -8 -2 -4 111.23 11.17
 -8 2 -5 98.6 10.62
 -8 -2 -5 108.27 11.32
 -8 2 -6 55.34 8.04
 -8 -2 -6 61.45 8.68
 -8 2 -7 41.36 7.45
 -8 -2 -7 46.94 7.86
 -8 2 -8 7.34 3.45
 -8 -2 -8 10.18 3.96
 -8 2 -9 8.18 3.47
 -8 -2 -9 5.98 2.88
 -8 2 -10 -1.75 2.09
 -8 -2 -10 1.18 1.36
 -8 2 -11 -1.63 1.36
 -8 -2 -11 5.69 3.8
 -8 2 -12 -2.13 2.1
 -8 -2 -12 0 1.21
 8 -3 -13 4.04 3.07
 8 3 -13 2.22 1.66
 8 -3 -12 0.94 2.17
 8 3 -12 -1.44 2.18
 8 -3 -11 21.22 5.9
 8 3 -11 15.92 4.38
 8 -3 -10 1.45 1.48
 8 3 -10 -1.68 2.27
 8 -3 -9 6.23 2.8
 8 3 -9 5.22 2.58
 8 -3 -8 12.55 3.75
 8 3 -8 14.21 4.02
 8 -3 -7 34.48 6.73
 8 3 -7 28.28 5.65
 -8 3 7 30.23 5.61
 8 -3 -6 113.42 11.45
 -8 3 6 116.63 10.99
 8 -3 -5 142.47 11.89
 8 3 -5 151.72 12.49
 8 -3 -5 155.55 13.37
 -8 3 5 157.97 12.45
 -8 3 4 69.29 8.18
 -8 -3 4 64.52 8.29
 8 -3 -4 65.35 8.04
 8 3 -4 69.27 8.09
 8 -3 -4 71.45 8.81
 -8 3 4 65.98 7.46
 -8 3 3 -0.71 1.45
 -8 3 3 0.7 1.18
 -8 -3 3 0.59 0.88
 8 -3 -3 -1.55 2.07
 8 3 -3 -0.2 0.93
 -8 -3 3 0.62 0.82
 -8 3 2 467.5 20.93
 -8 -3 2 516.53 22.84
 8 -3 -2 470.73 21.12
 8 3 -2 472.59 20.44
 -8 -3 2 466.16 13.38
 -8 3 2 462.72 19.61
 -8 -3 1 11.38 2.24
 -8 3 1 13.07 3.36
 8 -3 -1 10.12 3.05
 8 3 -1 9.86 2.86
 -8 3 1 10.76 2.97
 -8 -3 1 12.08 3.36
 -8 3 0 -0.42 0.77
 -8 -3 0 0.57 0.74
 -8 3 0 -0.31 1.17
 -8 -3 0 -0.4 1.42
 -8 3 -1 10.99 3.11
 -8 -3 -1 12.18 2.47
 -8 3 -2 -0.18 1.28
 -8 3 -3 2.44 1.7
 -8 -3 -3 0.57 1.85
 -8 3 -3 1.32 0.98
 -8 3 -4 23.03 5.15
 -8 -3 -4 23.79 5.17
 -8 3 -4 20.22 4.25
 -8 3 -5 4.6 1.94
 -8 -3 -5 4.99 2.47
 -8 3 -6 40.21 6.71
 -8 -3 -6 41.21 7.01
 -8 3 -7 -0.25 1.6
 -8 -3 -7 -1.39 2.07
 -8 3 -8 16.56 4.8
 -8 -3 -8 15.44 5.09
 -8 3 -9 2.21 1.14
 -8 -3 -9 0.87 1.18
 -8 3 -10 6.62 3.11
 -8 -3 -10 4.7 2.6
 -8 3 -11 -2.38 2.43
 -8 -3 -11 3.57 2.81
 -8 3 -12 1.45 2.02
 -8 -3 -12 4.11 3.24
 8 -4 -12 0.23 1.13
 8 4 -12 -0.2 1.21
 8 -4 -11 3.04 2.4
 8 4 -11 3.16 2.42
 8 -4 -10 3.47 3.18
 8 4 -10 -1.42 1.99
 8 -4 -9 53.57 8.68
 8 4 -9 47.17 7.06
 8 -4 -8 18.98 4.91
 8 -4 -7 8.37 2.91
 -8 4 7 11.59 3.47
 8 -4 -6 26.71 5.44
 -8 4 6 26.74 5.55
 -8 4 5 8.91 2.99
 8 -4 -5 8.21 3.1
 8 4 -5 8.82 2.82
 8 -4 -5 8.15 2.92
 -8 4 4 26.91 4.91
 -8 4 4 29.57 5.2
 -8 -4 4 29.53 5.57
 8 -4 -4 31.33 5.51
 8 4 -4 28.19 5.29
 8 -4 -4 34.73 6.33
 -8 4 3 35.59 5.62
 -8 4 3 33.21 5.38
 -8 -4 3 35.28 5.81
 8 -4 -3 37.01 5.76
 8 4 -3 43.95 6.33
 -8 4 2 99.63 9.45
 -8 -4 2 106.31 10.22
 8 -4 -2 100.96 9.89
 8 4 -2 110.71 9.89
 -8 -4 2 98.44 5.32
 -8 4 2 95.14 9.33
 -8 4 1 86.71 8.52
 -8 -4 1 88.2 9.1
 8 -4 -1 86.1 9.17
 -8 -4 1 77.1 5.27
 -8 4 1 72.62 7.99
 -8 4 0 37.3 5.78
 -8 4 0 44.16 5.85
 -8 -4 0 44.3 6.34
 -8 -4 0 42.42 4.05
 -8 4 -1 2.9 1.7
 -8 -4 -1 -0.15 0.85
 -8 4 -2 2.59 1.9
 -8 4 -3 34.91 5.88
 -8 -4 -3 35.26 6.05
 -8 4 -3 29.68 5.27
 -8 4 -4 27.27 5.52
 -8 -4 -4 26.11 5.36
 -8 4 -4 20.42 4.85
 -8 4 -5 203.48 14.86
 -8 -4 -5 208.35 16.09
 -8 4 -6 5.6 2.74
 -8 -4 -6 5.52 2.66
 -8 4 -7 1.21 1.09
 -8 -4 -7 1.89 1.7
 -8 4 -8 9.57 3.58
 -8 -4 -8 11.43 4.42
 -8 4 -9 1.39 1.4
 -8 -4 -9 4.87 3.2
 -8 4 -10 4.36 2.74
 -8 -4 -10 3.24 2.71
 -8 4 -11 3.23 2.74
 -8 -4 -11 2.91 2.74
 -8 4 -12 1.39 2.04
 -8 -4 -12 5.05 3.67
 8 -5 -12 -6.87 4.38
 8 -5 -11 2.66 2.44
 8 -5 -10 3.09 2.35
 8 5 -10 3.37 2.1
 8 -5 -9 7.02 3.45
 8 -5 -8 3.19 2.17
 -8 5 8 0.54 0.64
 8 -5 -7 3.84 2.58
 -8 5 7 8.42 3.44
 8 -5 -6 22.47 5.48
 -8 5 6 18.78 4.66
 -8 5 5 14.13 4.1
 8 -5 -5 11.74 3.86
 8 5 -5 18.7 4.55
 8 -5 -5 12.32 3.8
 -8 5 4 5.63 2.47
 -8 5 4 4.48 2.3
 -8 -5 4 4.81 2.42
 8 -5 -4 6.31 2.62
 8 5 -4 4.72 2.27
 8 -5 -4 3.21 1.5
 -8 5 3 15.88 3.78
 -8 5 3 23.95 4.73
 -8 -5 3 22.27 4.85
 8 -5 -3 23.43 4.91
 8 5 -3 20.72 4.33
 -8 5 2 2.43 1.52
 -8 5 2 1.1 1.07
 -8 -5 2 6.06 2.73
 8 -5 -2 3.77 2.14
 8 5 -2 2.13 0.76
 -8 5 1 21.79 4.4
 -8 5 1 26.34 4.77
 -8 -5 1 21.7 4.64
 -8 -5 1 25.47 2.29
 -8 5 0 -0.47 1.05
 -8 -5 0 0.73 0.59
 -8 5 0 0.64 1.41
 -8 -5 0 -0.4 1.57
 -8 5 -1 88.91 9.12
 -8 -5 -1 103.86 6.93
 -8 5 -2 1.63 0.86
 -8 5 -3 8.94 3.42
 -8 5 -4 13.4 3.54
 -8 -5 -4 12.66 3.79
 -8 5 -4 11.74 3.97
 -8 5 -5 5.4 2.64
 -8 5 -5 8.09 2.4
 -8 -5 -5 7.44 3.05
 -8 5 -6 1.22 1.35
 -8 -5 -6 1.02 1.96
 -8 5 -7 19.8 4.99
 -8 -5 -7 21 5.27
 -8 5 -8 3.85 2.55
 -8 -5 -8 1.57 1.76
 -8 5 -9 3.32 2.5
 -8 -5 -9 6.83 3.51
 -8 5 -10 -1.3 1.54
 -8 -5 -10 0.37 1.01
 -8 5 -11 -4.19 2.71
 -8 -5 -11 0.32 1.71
 -8 5 -12 0.04 1.49
 8 -6 -11 1.77 1.74
 8 -6 -10 1.17 0.92
 8 -6 -9 9.43 3.08
 8 -6 -8 6.61 3.58
 -8 6 8 1.5 1.59
 8 -6 -7 0.87 1.41
 -8 6 7 1.43 1.41
 8 -6 -6 31.33 5.96
 8 6 -6 27.22 5.39
 8 -6 -6 28.99 5.77
 -8 6 6 28.45 5.92
 -8 6 5 7.68 2.99
 8 -6 -5 8.67 2.77
 8 6 -5 9.52 3.21
 8 -6 -5 9.77 3.8
 -8 6 4 43.7 6.78
 8 6 -4 48.66 6.67
 8 -6 -4 47.27 6.81
 8 -6 -4 45.7 7.49
 -8 6 3 106.07 9.6
 -8 -6 3 124.56 11.4
 8 -6 -3 109.69 10.42
 8 6 -3 112.02 10.09
 -8 6 3 96.83 9.85
 -8 6 2 0.35 1.18
 -8 6 2 -0.29 1.11
 -8 -6 2 -0.48 0.8
 8 -6 -2 2.1 1.74
 8 6 -2 0.64 1.14
 -8 6 1 -0.06 1.19
 -8 6 1 2.39 1.66
 -8 -6 1 0.89 1.47
 -8 6 0 2.46 1.59
 -8 6 0 3.7 1.9
 -8 -6 0 3.72 2.39
 -8 6 -1 23.94 4.88
 -8 -6 -1 29.98 3.28
 -8 6 -2 -2.03 1.68
 -8 6 -3 8.84 3.38
 -8 6 -4 1.22 1.44
 -8 -6 -4 -1.26 1.72
 -8 6 -4 1.06 1.22
 -8 6 -5 2.52 1.92
 -8 6 -5 -0.16 1.55
 -8 -6 -5 -0.6 1.4
 -8 6 -6 5.07 2.54
 -8 6 -6 4.29 2.41
 -8 -6 -6 1.71 1.56
 -8 6 -7 7.43 3.1
 -8 -6 -7 8.86 3.57
 -8 6 -8 5.7 2.86
 -8 -6 -8 4.44 2.75
 -8 6 -9 6.52 2.97
 -8 -6 -9 23.58 6.42
 -8 6 -10 -2.83 2.18
 -8 -6 -10 2.07 2.06
 -8 6 -11 -0.53 1.06
 -8 -6 -11 -1.75 1.94
 8 -7 -11 2.08 2.03
 8 -7 -10 16.51 5.46
 8 -7 -9 11.63 4.24
 8 -7 -8 2.8 2.16
 -8 7 8 4.65 2.56
 8 -7 -7 -1.21 2
 -8 7 7 1.48 1.41
 8 -7 -6 6.8 2.98
 8 7 -6 6.66 2.84
 8 -7 -6 6.43 3.42
 -8 7 6 7.05 3.2
 -8 7 5 0.86 0.76
 8 -7 -5 0.39 0.72
 8 7 -5 1.02 1.25
 8 -7 -5 0.01 1.75
 -8 7 4 5.91 2.72
 8 -7 -4 4.25 1.98
 8 7 -4 3.82 2.07
 8 -7 -4 8.67 3.63
 -8 7 3 14.47 3.88
 -8 7 3 19.89 4.33
 -8 -7 3 26.13 5.12
 8 -7 -3 14.53 3.1
 8 7 -3 16.08 3.85
 -8 7 2 64.16 7.35
 -8 -7 2 72.96 8.62
 8 -7 -2 75.77 8.39
 8 7 -2 67.54 7.64
 -8 7 2 59.57 7.88
 -8 7 1 5.85 2.72
 -8 7 1 1.12 0.81
 -8 -7 1 3.75 2.08
 -8 7 0 4.72 2.13
 -8 7 0 8.19 2.68
 -8 -7 0 5.56 1.71
 -8 7 -1 17.3 4.4
 -8 7 -1 15.01 3.48
 -8 -7 -1 22.12 4.78
 -8 7 -2 27.84 5.51
 -8 7 -3 12.04 3.52
 -8 7 -4 33.38 5.75
 -8 -7 -4 41.91 7.07
 -8 7 -4 32.62 6.08
 -8 7 -5 2.93 0.92
 -8 -7 -5 9.2 3.51
 -8 7 -5 5.13 2.73
 -8 7 -6 3.45 2.4
 -8 7 -6 0.87 0.89
 -8 -7 -6 2.16 1.99
 -8 7 -7 -0.46 1.17
 -8 7 -7 0.66 1.13
 -8 -7 -7 -2.53 2.28
 -8 7 -8 0.12 1.36
 -8 -7 -8 0.91 0.8
 -8 7 -9 0.82 1.33
 -8 -7 -9 5.88 3.33
 -8 7 -10 0.23 0.6
 -8 -7 -10 -3.37 2.61
 -8 7 -11 0.09 1.52
 -8 -7 -11 3.05 3.24
 8 -8 -11 4.89 3.56
 8 -8 -10 -0.44 2.33
 8 -8 -9 -2.87 2.62
 8 -8 -8 6.69 2.99
 -8 8 8 11.27 4.23
 8 -8 -7 5.42 2.82
 8 8 -7 7.48 2.75
 8 -8 -7 8.92 3.65
 -8 8 7 8.31 3.47
 8 8 -6 48.38 7.12
 8 -8 -6 45.17 7.4
 8 -8 -6 47.17 8.03
 -8 8 6 48.97 8.04
 -8 8 5 3.52 2.17
 8 -8 -5 -0.03 1.32
 8 8 -5 1.83 1.47
 8 -8 -5 0.47 1.63
 -8 8 4 3.84 2.1
 8 -8 -4 1.39 1.02
 8 8 -4 2.01 1.36
 8 -8 -4 1.43 1.95
 -8 8 3 32.02 6.05
 -8 8 3 35.01 5.55
 -8 -8 3 40.32 6.42
 8 -8 -3 31.96 5.66
 8 8 -3 32.37 5.56
 -8 8 2 4.67 2.29
 -8 8 2 -0.11 0.92
 -8 -8 2 4.37 2.25
 -8 8 1 2.32 1.35
 -8 8 1 2.58 1.67
 -8 8 0 11.82 3.42
 -8 8 0 10.51 2.91
 -8 -8 0 15.9 3.99
 -8 8 -1 44.93 7.23
 -8 8 -1 45.17 5.91
 -8 -8 -1 56.33 7.44
 -8 8 -2 21.73 4.98
 -8 8 -3 29.32 5.91
 -8 8 -4 -1.38 2
 -8 -8 -5 -1.56 1.52
 -8 8 -5 -1.42 1.69
 -8 8 -6 4.77 2.67
 -8 8 -6 1.9 0.6
 -8 -8 -6 3 1.45
 -8 8 -7 21.41 5.46
 -8 8 -7 14.98 4.49
 -8 -8 -7 19.37 5.27
 -8 8 -8 0.68 1.38
 -8 8 -8 -1.65 1.65
 -8 -8 -8 0.86 1.94
 -8 8 -9 -1.85 2.06
 -8 8 -9 0.4 1.2
 -8 -8 -9 1.43 2.22
 -8 8 -10 -0.23 1.15
 -8 8 -10 0.98 1.64
 -8 -8 -10 0.18 1.01
 -8 8 -11 -0.76 1.76
 -8 -8 -11 0 1.54
 8 -9 -10 -2.49 2.25
 8 -9 -9 -3.52 2.59
 8 9 -8 1.88 1.52
 8 -9 -8 -1.1 2.05
 -8 9 8 1.74 0.71
 8 -9 -7 2.98 2.21
 8 9 -7 3.49 1.93
 8 -9 -7 4.19 2.53
 -8 9 7 1.93 0.99
 8 -9 -6 -1.11 1.63
 8 9 -6 -1.93 2.1
 8 -9 -6 -3.23 2.51
 -8 9 6 0.79 0.93
 -8 9 5 -1.66 1.77
 8 -9 -5 3.71 2.49
 8 9 -5 0.06 1.19
 8 -9 -5 -2.16 2
 -8 9 4 9.51 3.57
 8 -9 -4 6.91 2.89
 8 9 -4 8.83 2.79
 8 -9 -4 6 2.48
 -8 9 3 23.83 5.26
 8 -9 -3 20.58 4.81
 8 9 -3 28.48 4.87
 -8 9 2 19.89 4.87
 -8 9 2 25.63 4.51
 -8 -9 2 29.21 5.35
 -8 9 1 2.56 1.17
 -8 9 1 2.36 1.78
 -8 -9 1 4.42 2.21
 -8 9 0 13.38 3.69
 -8 9 0 20.56 3.93
 -8 -9 0 27.7 5.21
 -8 9 -1 1.95 1.92
 -8 9 -1 2.67 1.4
 -8 -9 -1 5.06 2.4
 -8 9 -2 69 7.24
 -8 9 -2 63.98 8.75
 -8 9 -3 48.49 7.7
 -8 9 -4 -0.87 2.14
 -8 -9 -5 1.63 1.9
 -8 9 -5 -1.51 1.6
 -8 9 -6 1.55 1
 -8 -9 -6 2.66 2.62
 -8 9 -6 2.02 2.42
 -8 9 -7 1.41 1.54
 -8 9 -7 0.42 0.92
 -8 -9 -7 2.87 2.2
 -8 9 -8 13.93 4.67
 -8 9 -8 4.68 2.45
 -8 -9 -8 8.03 3.89
 -8 9 -9 14.96 5.23
 -8 9 -9 7.18 3.32
 -8 -9 -9 7.29 3.95
 -8 9 -10 2.32 2.15
 -8 -9 -10 0 1.31
 -8 9 -11 0 0.73
 -8 -9 -11 0.94 2.59
 8 -10 -10 -3.58 2.72
 8 10 -9 7.28 3.16
 8 -10 -9 0.74 1.51
 8 -10 -8 5.77 3.1
 8 10 -8 6.04 2.75
 8 -10 -8 -1.95 1.95
 -8 10 8 2 0.86
 8 -10 -7 -2.03 1.57
 8 10 -7 -0.2 1.03
 8 -10 -7 2.6 1.65
 -8 10 7 1.25 2.05
 8 -10 -6 1.27 1.63
 8 10 -6 1.39 1.61
 8 -10 -6 -2.06 2.33
 -8 10 6 1.03 1.67
 -8 10 5 7.25 3.03
 8 -10 -5 5.85 2.69
 8 10 -5 5.25 2.34
 8 -10 -5 5.26 3.25
 -8 10 4 0.63 1.25
 8 -10 -4 1.34 1.21
 8 10 -4 2.42 1.63
 8 -10 -4 0.57 1.82
 -8 10 3 -1.43 1.72
 -8 10 2 11.56 3.76
 -8 10 2 13.23 3.07
 -8 -10 2 16.21 4.09
 -8 10 1 5.41 2.73
 -8 10 1 4.63 1.86
 -8 -10 1 6.96 2.61
 -8 10 0 4.03 2.29
 -8 10 0 9.7 2.75
 -8 -10 0 6.98 2.62
 -8 10 -1 5.72 2.55
 -8 10 -1 4.52 1.93
 -8 -10 -1 4.5 2.16
 -8 10 -2 2.53 1.58
 -8 10 -2 -0.15 0.58
 -8 -10 -2 1.75 0.86
 -8 10 -3 3.38 1.95
 -8 10 -4 0.38 1.65
 -8 10 -5 -0.16 1.08
 -8 10 -6 -0.6 0.74
 -8 -10 -6 1.32 2
 -8 10 -6 0.69 1.53
 -8 10 -7 1.91 2.18
 -8 -10 -7 1.24 1.22
 -8 10 -8 9.82 3.98
 -8 -10 -8 0.27 1.32
 -8 10 -9 1.93 1.11
 8 -11 -9 0.93 2.38
 8 -11 -8 0 1.57
 -8 11 8 1.39 1.61
 8 -11 -7 11.31 4.43
 -8 11 7 27.34 6.72
 8 -11 -6 -0.15 0.7
 -8 11 6 1.69 1.07
 -8 11 5 3.66 1.93
 8 -11 -5 4.09 2.87
 -8 11 4 8.95 3.7
 8 -11 -4 12.11 4.67
 -8 11 3 6.63 2.99
 -8 11 2 3.33 2.65
 -8 11 1 4.11 1.84
 -8 11 0 -0.04 1.34
 -8 11 -1 5.18 2.73
 -8 11 -2 3.8 2.04
 -8 11 -3 11.12 3.53
 -8 11 -4 12.98 4.12
 -8 11 -5 5.03 2.23
 -8 11 -6 -1.5 2.27
 -8 11 -7 7.28 3.45
 -8 11 -8 -3.72 2.66
 8 -12 -8 0 1.35
 8 -12 -7 2.28 2.12
 -8 12 7 -0.56 1.47
 8 -12 -6 0.74 2.08
 -8 12 6 -3.17 2.03
 -8 12 5 -2.4 2.24
 8 -12 -5 -0.51 1.63
 -8 12 4 -1.41 1.66
 8 -12 -4 3.87 2.67
 -8 12 3 3.15 2.68
 -8 12 2 3.34 1.85
 -8 12 1 1.09 1.81
 -8 12 0 6.75 2.93
 -8 12 -1 6.57 3.1
 -8 12 -2 4.93 2.79
 -8 12 -3 6.88 3.23
 -8 12 -4 -1.97 2.25
 -8 12 -5 5.18 2.76
 -8 12 -6 5.33 2.59
 -8 12 -7 9.2 4.01
 8 -13 -8 -0.23 0.89
 8 -13 -7 0 0.89
 8 -13 -6 3.6 3.07
 -8 13 6 6.88 3.91
 -8 13 5 7.32 3.51
 8 -13 -5 -3.47 2.63
 -8 13 4 4.89 3.13
 -8 13 3 -0.62 1.83
 -8 13 2 4.66 2.49
 -8 13 1 0.33 1.48
 -8 13 0 -5.61 3.08
 -8 13 -1 0.1 1.64
 -8 13 -2 4.23 2.86
 -8 13 -3 4.03 2.38
 -8 13 -4 0 1.17
 -8 13 -5 3.47 2.79
 -8 13 -6 1.18 1.79
 8 -14 -7 4.77 3.7
 8 -14 -6 -7.24 3.58
 8 -14 -5 0.28 0.79
 -8 14 4 0.9 1.63
 -8 14 3 1.02 1.87
 -8 14 2 5.15 3.35
 -8 14 1 -0.35 1.26
 -8 14 0 1.05 1.13
 -8 14 -1 2.6 2.14
 -8 14 -2 -0.76 1.64
 -8 14 -3 -4.19 2.78
 -8 14 -4 0.92 1.62
 9 0 -13 6.02 3.6
 9 0 -12 -3.91 2.85
 9 0 -11 28.48 6.85
 9 0 -10 4.07 3.06
 9 0 -9 0.45 1.34
 9 0 -8 -2.63 3.07
 9 0 -7 15.77 4.22
 9 0 -6 -2.99 2.28
 -9 0 6 0.75 0.72
 9 0 -5 15.67 4.57
 -9 0 5 17.23 3.95
 -9 0 4 0.21 0.67
 -9 0 4 -1.18 1.56
 9 0 -4 -0.05 1.11
 -9 0 3 110.69 11.05
 9 0 -3 110.34 10.62
 -9 0 3 113.98 8.92
 -9 0 2 0.71 0.86
 9 0 -2 -0.76 1.93
 -9 0 2 -0.45 1.17
 -9 0 1 2.98 1.8
 -9 0 1 1.23 1.9
 -9 0 0 1.21 0.64
 -9 0 0 3.76 2.16
 -9 0 -1 86.5 8.16
 -9 0 -2 -1.03 1.7
 -9 0 -3 5.58 2.31
 -9 0 -4 3.98 2.19
 -9 0 -5 18.38 4.89
 -9 0 -6 2.17 1.85
 -9 0 -7 13.77 4.11
 -9 0 -8 -1.46 1.77
 -9 0 -9 46.78 8.72
 -9 0 -10 -2.89 1.47
 -9 0 -11 0.22 2.32
 9 1 -13 -0.82 1.67
 9 -1 -12 2.85 2.05
 9 1 -12 3.81 2.48
 9 -1 -11 5.71 3.25
 9 1 -11 2.42 2.56
 9 -1 -10 3.52 2.33
 9 1 -10 0.94 2
 9 -1 -9 4.86 3.25
 9 1 -9 -4.98 3.18
 9 -1 -8 -1.23 1.85
 9 1 -8 1.02 1.73
 9 -1 -7 48.4 7.77
 9 1 -7 49.03 7.82
 9 -1 -6 -1.92 2
 9 1 -6 2.56 1.66
 9 -1 -6 5.3 2.6
 -9 1 6 1.07 1.56
 9 -1 -5 4.47 2.7
 9 1 -5 6.11 2.94
 -9 -1 5 3.56 0.91
 -9 1 5 5.77 2.33
 -9 -1 4 11.18 2.92
 -9 1 4 9.15 2.67
 -9 1 4 11.04 3.84
 -9 -1 4 13.31 3.98
 9 -1 -4 12.21 3.6
 9 1 -4 10.68 3.65
 -9 1 3 24.48 4.24
 -9 1 3 25.95 5.53
 -9 -1 3 25.24 5.39
 9 -1 -3 27.59 5.35
 9 1 -3 21.82 4.66
 -9 -1 3 28.24 4.28
 -9 -1 2 8.5 2.3
 -9 1 2 8.29 2.68
 9 -1 -2 9.31 3.13
 9 1 -2 7.11 2.65
 -9 1 2 9.96 3.15
 -9 -1 2 6.72 2.37
 -9 1 1 70.88 8.47
 -9 -1 1 65.69 8.25
 -9 -1 1 66.52 6.76
 -9 1 1 64.33 6.98
 -9 1 0 -0.87 0.7
 -9 -1 0 2.21 1.59
 -9 1 0 3.26 2.33
 -9 -1 0 -1.37 1.66
 -9 1 -1 2.7 1.87
 -9 -1 -1 0.81 0.96
 -9 1 -2 43.86 6.17
 -9 -1 -2 45.5 5.84
 -9 1 -3 29.58 5.46
 -9 1 -4 15.46 4.29
 -9 -1 -4 13.1 4.18
 -9 1 -5 -1.43 1.55
 -9 -1 -5 -1.55 2.25
 -9 1 -6 1.2 1.49
 -9 -1 -6 3.53 2.83
 -9 1 -7 9.66 3.38
 -9 -1 -7 10.74 3.91
 -9 1 -8 14.59 4.68
 -9 -1 -8 14.92 4.45
 -9 1 -9 5.44 2.74
 -9 -1 -9 3.55 2.46
 -9 1 -10 20.35 6
 -9 -1 -10 17.41 5.88
 -9 1 -11 -1.24 2.1
 -9 -1 -11 1.06 1.62
 9 2 -13 0.78 1.9
 9 -2 -12 0 1.78
 9 2 -12 2 2.54
 9 -2 -11 3.68 2.27
 9 2 -11 2.89 2.04
 9 -2 -10 0.59 1.53
 9 2 -10 -0.26 1.27
 9 -2 -9 8.08 3.07
 9 2 -9 5.34 2.76
 9 -2 -8 0.91 1.37
 9 2 -8 3.32 1.94
 9 -2 -7 9.61 3.38
 -9 2 7 10.03 3.26
 9 -2 -6 12.92 4.1
 9 2 -6 8.45 3.26
 9 -2 -6 11.84 3.97
 -9 2 6 10.48 2.82
 -9 2 5 0.49 0.73
 9 -2 -5 -0.85 1.87
 9 2 -5 -1.91 1.95
 -9 -2 5 0.96 1.01
 -9 2 4 -0.02 1.08
 -9 2 4 0.14 1.67
 -9 -2 4 -0.44 1.37
 9 -2 -4 1.18 1.44
 9 2 -4 0.97 1.18
 -9 -2 4 -0.54 0.73
 -9 2 3 141.1 12.25
 -9 -2 3 152.79 12.84
 9 -2 -3 135.53 12.01
 9 2 -3 137.06 11.89
 -9 -2 3 129.34 8.57
 -9 2 3 129.94 10.35
 -9 -2 2 7.68 2.13
 -9 2 2 7.84 2.69
 -9 2 2 7.65 2.94
 9 -2 -2 8.13 3.08
 -9 -2 2 7.27 2.96
 9 2 -2 6.44 2.96
 -9 2 1 242.48 15.68
 -9 -2 1 255.9 16.68
 -9 -2 1 242.36 11.99
 -9 2 1 246.63 14.54
 -9 2 0 17.61 3.97
 -9 -2 0 19.26 3.47
 -9 2 0 20.53 4.53
 -9 -2 0 15.46 3.92
 -9 2 -1 3.16 2.12
 -9 -2 -1 -0.17 1.15
 -9 2 -2 0.21 1.47
 -9 -2 -2 3.89 2.41
 -9 2 -3 2.06 2.09
 -9 2 -4 4.88 2.29
 -9 -2 -4 8.87 3.57
 -9 2 -4 8.49 2.96
 -9 2 -5 48.19 7.83
 -9 -2 -5 55.14 8.44
 -9 2 -6 3.52 2.18
 -9 -2 -6 6.09 2.46
 -9 2 -7 0.93 0.88
 -9 -2 -7 2.72 2.11
 -9 2 -8 17.21 5.01
 -9 -2 -8 16.52 4.99
 -9 2 -9 7.28 3.77
 -9 -2 -9 7.73 3.7
 -9 2 -10 5.11 3.1
 -9 -2 -10 6.55 3.39
 -9 2 -11 3.78 3.37
 -9 -2 -11 3.33 3.01
 9 3 -13 0.21 0.75
 9 -3 -12 9.89 4.24
 9 3 -12 11.3 4
 9 -3 -11 -4.23 2.87
 9 3 -11 0.29 1.29
 9 -3 -10 1.58 2.33
 9 3 -10 2.04 1.85
 9 -3 -9 17.47 5.05
 9 3 -9 19.27 5.05
 9 -3 -8 4.2 2.88
 9 -3 -7 19.6 5.21
 -9 3 7 16.22 4.22
 9 -3 -6 4.53 2.47
 9 3 -6 7.59 3.2
 9 -3 -6 4.65 2.37
 -9 3 6 7.77 2.83
 9 -3 -5 74.39 9.21
 9 3 -5 86 9.57
 9 -3 -5 82.38 9.9
 -9 3 5 85.49 9.44
 -9 3 4 18.72 4.03
 -9 3 4 12.04 3.59
 -9 -3 4 14.55 4.14
 9 -3 -4 11.59 3.56
 9 3 -4 17.79 4.13
 -9 3 3 208.03 14.71
 -9 -3 3 208.28 15.52
 9 -3 -3 202.57 14.58
 9 3 -3 204.04 14.31
 -9 -3 3 248.26 11.05
 -9 3 3 225.53 14.55
 -9 -3 2 16.52 2.78
 -9 3 2 16.29 3.87
 -9 3 2 16.83 4.2
 -9 -3 2 16.67 4.5
 9 -3 -2 15.04 3.96
 9 3 -2 21.93 4.72
 -9 3 1 218.06 14.86
 -9 -3 1 243.84 16.19
 -9 -3 1 208.2 10.43
 -9 3 1 208.86 13.78
 -9 3 0 65 7.88
 -9 -3 0 78.4 9.03
 -9 3 0 70.44 7.98
 -9 -3 0 68.6 6.07
 -9 3 -1 -0.69 0.85
 -9 -3 -1 0.99 1.11
 -9 3 -2 14.4 3.92
 -9 -3 -2 14.97 3.35
 -9 3 -3 16.86 4.32
 -9 3 -4 45 7.16
 -9 -3 -4 48.45 7.9
 -9 3 -4 36.6 6.47
 -9 3 -5 7.32 3.18
 -9 -3 -5 5.53 2.37
 -9 3 -6 24.29 5.53
 -9 -3 -6 29.97 6.49
 -9 3 -7 19.25 5.03
 -9 -3 -7 22.06 5.42
 -9 3 -8 1.99 2.4
 -9 -3 -8 -1.68 1.84
 -9 3 -9 20.62 5.58
 -9 -3 -9 29.52 7.19
 -9 3 -10 4.1 2.82
 -9 -3 -10 10.12 4.34
 -9 3 -11 1.16 2.56
 -9 -3 -11 6.45 4.2
 9 -4 -11 0.36 1.1
 9 4 -11 2.46 2.35
 9 -4 -10 2.67 2.27
 9 -4 -9 4.26 2.94
 9 -4 -8 15.48 4.44
 -9 4 8 13.92 4.21
 9 -4 -7 10.81 4.15
 -9 4 7 8.95 3.42
 9 -4 -6 1.95 1.67
 9 4 -6 0.74 1.44
 9 -4 -6 5.63 3.16
 -9 4 6 5.26 2.67
 -9 4 5 4.69 2.08
 9 -4 -5 8.94 3.03
 9 4 -5 5.44 2.43
 9 -4 -5 2.75 1.67
 -9 4 4 57.43 7.78
 -9 -4 4 60.04 8.53
 9 -4 -4 66.02 8.44
 9 4 -4 61.06 7.92
 -9 4 4 51.82 7.29
 -9 4 3 10.4 3.28
 -9 4 3 10.74 3.42
 -9 -4 3 9.1 3.13
 9 -4 -3 8.71 3.04
 9 4 -3 7.66 2.84
 -9 4 2 -0.68 1.09
 -9 4 2 1.92 1.72
 -9 -4 2 0.04 1.22
 9 -4 -2 -0.44 1.43
 9 4 -2 1.4 1.68
 -9 -4 1 1.29 0.79
 -9 4 1 0.66 1.2
 -9 4 1 0.7 1.65
 -9 -4 1 0.55 1.39
 -9 4 0 57.54 7.34
 -9 -4 0 65.02 8.24
 -9 4 0 59.52 7.49
 -9 -4 0 70.36 5.79
 -9 4 -1 9.46 2.87
 -9 -4 -1 13.18 2.83
 -9 4 -2 31.43 5.63
 -9 4 -3 4.39 2.62
 -9 4 -4 10.31 3.42
 -9 -4 -4 16.37 4.78
 -9 4 -4 11.4 3.6
 -9 4 -5 11.78 3.35
 -9 -4 -5 16.97 4.81
 -9 4 -5 16.96 4.52
 -9 4 -6 15.8 4.52
 -9 -4 -6 15.44 4.91
 -9 4 -7 3.17 2.09
 -9 -4 -7 2.98 2.19
 -9 4 -8 0.3 0.76
 -9 -4 -8 2.38 2.54
 -9 4 -9 9.44 4
 -9 -4 -9 11.44 4.58
 -9 4 -10 3.15 2.63
 -9 -4 -10 -5.49 3.31
 -9 4 -11 3.62 3.6
 -9 -4 -11 4.03 4.18
 9 -5 -11 -3.62 2.73
 9 -5 -10 -5.17 4.28
 9 -5 -9 7.24 2.7
 9 -5 -8 1.76 1.93
 -9 5 8 1.24 1.09
 9 -5 -7 6.41 2.57
 -9 5 7 3 1.5
 9 -5 -6 5.18 2.8
 9 5 -6 -1.51 2.04
 9 -5 -6 4.29 2.75
 -9 5 6 0.11 1.24
 -9 5 5 -1.33 1.25
 9 5 -5 -0.32 1.58
 9 -5 -5 0.47 1.2
 -9 5 4 8.66 3.08
 -9 5 4 8.96 3.01
 -9 -5 4 9.58 3.17
 9 -5 -4 12.47 3.43
 9 5 -4 10.31 3.57
 -9 5 3 16.75 4.28
 -9 5 3 14.83 3.86
 -9 -5 3 17.72 4.54
 9 -5 -3 14.42 3.73
 9 5 -3 12.47 3.45
 -9 5 2 2.12 1.12
 -9 5 2 1.86 1.64
 -9 -5 2 0.46 0.96
 9 -5 -2 -0.33 1.93
 9 5 -2 -1.34 1.31
 -9 5 1 25.32 5.11
 -9 5 1 32.69 5.62
 -9 -5 1 32.86 6.17
 -9 5 0 16.45 4.04
 -9 5 0 18.62 4.05
 -9 -5 0 18.72 4.63
 -9 5 -1 1.35 1.53
 -9 -5 -1 1.2 0.89
 -9 5 -2 43.79 6.93
 -9 5 -3 5.21 2.57
 -9 -5 -4 38.61 7.16
 -9 5 -4 40.58 6.91
 -9 5 -5 0.43 0.98
 -9 -5 -5 0.32 1.1
 -9 5 -5 -0.34 1.32
 -9 5 -6 30.67 6.37
 -9 5 -6 29.56 6.31
 -9 -5 -6 36.68 7.37
 -9 5 -7 -3.58 2.48
 -9 -5 -7 -1.13 1.6
 -9 5 -8 6.91 3.3
 -9 -5 -8 3.5 2.37
 -9 5 -9 0.06 1.08
 -9 -5 -9 -6.8 3.51
 -9 5 -10 -5.62 3.14
 -9 -5 -10 -3.17 2.57
 -9 5 -11 4.36 3.72
 -9 -5 -11 0.73 1.73
 9 -6 -11 10.07 4.37
 9 -6 -10 -10.12 4.32
 9 -6 -9 6.19 2.95
 9 -6 -8 8.28 3.91
 -9 6 8 5.99 2.84
 9 -6 -7 8.53 3.5
 9 6 -7 8.33 3.18
 9 -6 -7 8.54 2.89
 -9 6 7 6.12 2.69
 -9 6 6 -0.7 0.72
 9 -6 -6 -1.14 0.93
 9 6 -6 2.59 2.37
 9 -6 -6 -0.29 1.63
 -9 6 5 9.49 3.57
 9 -6 -5 17.73 4.55
 9 6 -5 11.26 3.56
 9 -6 -5 14.85 4.41
 -9 6 4 59.38 7.91
 -9 -6 4 68.21 9.28
 9 6 -4 62.46 8.23
 9 -6 -4 57.54 7.76
 -9 6 4 54.25 7.74
 -9 6 3 -0.05 0.84
 -9 6 3 -1.46 1.56
 -9 -6 3 0.55 1.37
 9 -6 -3 0.27 1.28
 9 6 -3 0.16 0.96
 -9 6 2 11.84 3.7
 -9 6 2 14.2 3.66
 -9 -6 2 15.13 4.05
 9 -6 -2 11.64 3.33
 9 6 -2 12.8 3.77
 -9 6 1 10.38 3.13
 -9 6 1 7.61 2.43
 -9 -6 1 4.94 1.91
 -9 6 0 1.85 0.94
 -9 6 0 0.34 0.85
 -9 -6 0 -0.8 1.63
 -9 6 -1 13.34 3.79
 -9 6 -1 8.88 3.01
 -9 -6 -1 9.84 3.32
 -9 6 -2 4.75 2.34
 -9 6 -3 1 0.94
 -9 6 -4 -0.6 1.12
 -9 6 -5 16.63 4.43
 -9 -6 -5 14.45 4.63
 -9 6 -5 13.36 4.01
 -9 6 -6 -0.61 1.08
 -9 -6 -6 -0.58 1.69
 -9 6 -6 1.96 1.84
 -9 6 -7 0.86 1.12
 -9 6 -7 1.35 1.32
 -9 -6 -7 -0.09 1.06
 -9 6 -8 -2.59 2.98
 -9 -6 -8 4.23 2.5
 -9 6 -9 -0.09 0.99
 -9 -6 -9 9.3 4.21
 -9 6 -10 -0.14 0.77
 -9 -6 -10 0.99 2.41
 -9 6 -11 -1.38 1.73
 -9 -6 -11 -1.12 1.68
 9 -7 -10 -5.98 3.88
 9 -7 -9 2.47 2.56
 9 -7 -8 1.55 1.99
 9 7 -8 -1.71 1.64
 -9 7 8 -0.9 0.65
 9 -7 -7 5.64 2.73
 9 7 -7 13.97 3.95
 9 -7 -7 15.87 4.79
 -9 7 7 15.05 4.68
 -9 7 6 20.32 5.29
 9 -7 -6 11.07 2.81
 9 7 -6 22.33 5.43
 9 -7 -6 22.04 5.24
 -9 7 5 31.63 6.38
 9 -7 -5 26.55 5.56
 9 7 -5 33.17 6.23
 9 -7 -5 29.95 6.35
 -9 7 4 -0.98 1.54
 9 -7 -4 0.38 1.65
 9 7 -4 1.03 1.08
 -9 7 3 20.53 4.75
 -9 7 3 20.59 4.49
 -9 -7 3 36.53 6.53
 9 -7 -3 26.89 5.52
 9 7 -3 27.79 5.51
 -9 7 2 15.18 4.19
 -9 7 2 18.69 4.34
 -9 -7 2 22.53 5.17
 -9 7 1 30.54 5.93
 -9 7 1 27.12 5.01
 -9 -7 1 35.36 6.48
 -9 7 0 7.33 2.71
 -9 7 0 12.87 3.51
 -9 -7 0 10.8 3.55
 -9 7 -1 5.43 2.63
 -9 7 -1 4.03 2.09
 -9 -7 -1 5.64 2.7
 -9 7 -2 11.5 3.42
 -9 7 -3 6.22 2.8
 -9 7 -4 3.29 2.34
 -9 7 -5 3.11 1.72
 -9 -7 -5 5.19 2.74
 -9 7 -5 3.48 2.16
 -9 7 -6 0.11 1.25
 -9 -7 -6 2.25 1.84
 -9 7 -6 0.48 1.1
 -9 7 -7 1.51 0.77
 -9 -7 -7 5.3 2.72
 -9 7 -8 9.47 3.66
 -9 7 -8 3.07 2.19
 -9 -7 -8 5.51 3.71
 -9 7 -9 5.74 3.55
 -9 7 -9 2.39 1.94
 -9 7 -10 0 1.8
 -9 -7 -10 -3.19 2.51
 9 -8 -10 3.61 2.83
 9 8 -9 7.94 3.32
 9 -8 -9 14.17 5.31
 9 -8 -8 4.31 2.47
 9 8 -8 6.3 3.18
 9 -8 -8 1.37 1.29
 -9 8 8 6.01 2.71
 9 -8 -7 2.26 1.67
 9 8 -7 5.4 2.64
 9 -8 -7 7.58 3.58
 -9 8 7 4.6 2.19
 -9 8 6 10.85 3.97
 9 -8 -6 9.59 3.53
 9 8 -6 8.04 3.01
 9 -8 -6 19.64 5.49
 -9 8 5 10.52 3.97
 9 -8 -5 6.71 2.86
 9 8 -5 8.89 2.99
 9 -8 -5 10.89 4.02
 -9 8 4 10.72 3.59
 9 -8 -4 5.22 1.93
 9 8 -4 8.72 3.04
 -9 8 3 73.34 8.38
 -9 -8 3 76.51 9.49
 9 -8 -3 69.26 8.93
 9 8 -3 77.17 8.74
 -9 8 3 66.58 8.92
 -9 8 2 7.89 2.64
 -9 8 2 10.04 2.89
 -9 -8 2 11.26 3.86
 -9 8 1 6.73 2.87
 -9 8 1 6.81 2.33
 -9 -8 1 5.56 2.8
 -9 8 0 1.9 1.37
 -9 8 0 -1.14 1.79
 -9 -8 0 2.79 1.97
 -9 8 -1 1.25 0.61
 -9 -8 -1 -0.05 1.57
 -9 8 -2 3.84 2.48
 -9 8 -3 -1.37 1.25
 -9 8 -4 1.84 1.15
 -9 8 -5 4.64 3.48
 -9 8 -6 -2.97 2.12
 -9 -8 -6 -4.9 3.09
 -9 8 -6 -3.19 2.9
 -9 8 -7 2.56 1.69
 -9 -8 -7 4.84 2.9
 -9 8 -7 8.67 3.79
 -9 8 -8 0.46 1.38
 -9 8 -8 -0.2 1.2
 -9 -8 -8 3.77 3.22
 -9 8 -9 2.43 2.38
 -9 -8 -9 0.58 1.17
 -9 8 -10 0.27 1.17
 -9 -8 -10 0 1.43
 9 -9 -9 2.14 2.44
 9 9 -9 4.28 2.85
 9 -9 -9 4.27 3.57
 -9 9 9 5.27 3.02
 9 -9 -8 6.77 3.42
 9 9 -8 3.97 2.25
 9 -9 -8 3.02 3.06
 -9 9 8 2.9 2.38
 9 -9 -7 -0.02 1.07
 9 9 -7 1.02 1.39
 9 -9 -7 -3.37 2.54
 -9 9 7 -1.18 0.98
 -9 9 6 22.61 5.88
 9 -9 -6 13.25 4.42
 9 9 -6 20.44 4.71
 9 -9 -6 11.75 4.02
 -9 9 5 5.24 2.63
 9 -9 -5 3.18 1.63
 9 9 -5 5.4 2.45
 9 -9 -5 3.98 2.78
 -9 9 4 -0.9 1.58
 9 -9 -4 -1.47 1.86
 9 9 -4 2.02 1.67
 -9 9 3 -0.77 1.73
 -9 -9 3 2.45 2.18
 -9 9 2 -1.48 1.79
 -9 9 2 0 0.81
 -9 -9 2 -1.27 1.42
 -9 9 1 10.6 3.56
 -9 9 1 12.69 3.19
 -9 -9 1 16.09 4.39
 -9 9 0 2.46 1.82
 -9 9 0 2.73 1.68
 -9 -9 0 3.94 2.03
 -9 9 -1 5.66 2.34
 -9 9 -1 9.29 2.92
 -9 -9 -1 13.65 3.8
 -9 9 -2 0.85 0.79
 -9 -9 -2 0.17 1.17
 -9 9 -3 3.88 2.63
 -9 9 -4 12.06 3.83
 -9 9 -5 2.4 2.15
 -9 -9 -6 2.96 2.35
 -9 9 -6 5.81 3.43
 -9 9 -7 1.25 1.55
 -9 -9 -7 -1.74 1.76
 -9 9 -7 -4.4 3.25
 -9 9 -8 0.34 0.89
 -9 9 -8 -0.53 1.44
 -9 -9 -8 -0.46 1.11
 -9 9 -9 -2.77 2.14
 -9 -9 -9 0.42 1.06
 -9 9 -10 -0.27 0.98
 -9 -9 -10 0.43 1.1
 9 -10 -9 15.13 6.1
 9 10 -8 22.02 5.58
 9 -10 -8 13.54 5.21
 -9 10 8 27.64 6.98
 9 -10 -7 -1.79 1.98
 9 10 -7 -0.3 1.07
 9 -10 -7 3.39 2.5
 -9 10 7 1.42 1.79
 -9 10 6 4.53 2.81
 9 -10 -6 7.62 3.33
 9 10 -6 8.08 2.94
 9 -10 -6 -2.16 2.03
 -9 10 5 1.44 1.2
 9 -10 -5 -1.62 1.85
 9 10 -5 -1.88 1.61
 -9 10 4 -0.47 1.28
 9 -10 -4 0.42 1.04
 9 10 -4 0.24 1.06
 -9 10 3 3.74 2.13
 -9 10 2 -1.27 1.85
 -9 10 2 -1 1.32
 -9 -10 2 2.45 2.11
 -9 10 1 -1.66 2.12
 -9 10 1 1.69 1.35
 -9 -10 1 1.49 1.47
 -9 10 0 2.37 2.25
 -9 10 0 0.66 1.06
 -9 -10 0 4.47 2.64
 -9 10 -1 -0.25 0.77
 -9 -10 -1 -0.1 0.97
 -9 10 -2 3.29 2.46
 -9 10 -2 0.92 0.8
 -9 -10 -2 1.07 1.53
 -9 10 -3 -1.34 1.76
 -9 10 -3 2.12 1.76
 -9 10 -4 3.75 2.52
 -9 10 -5 0.79 1.54
 -9 10 -6 3.55 2.11
 -9 10 -7 0.51 1
 9 -11 -8 2.04 2.84
 9 -11 -7 2.78 2.85
 -9 11 7 1.65 1.63
 9 -11 -6 1.69 1.84
 -9 11 6 1.87 1.92
 -9 11 5 2.88 2.39
 9 -11 -5 1.2 1.79
 -9 11 4 5.64 2.81
 -9 11 3 2.11 1.77
 -9 11 2 -2.34 2.34
 -9 11 1 1.38 1.22
 -9 11 0 13.35 4.41
 -9 11 -1 3.92 2.52
 -9 11 -2 -4.65 2.65
 -9 11 -3 4.44 3.05
 -9 11 -4 5.88 3.04
 -9 11 -5 3.29 2.84
 -9 11 -6 13.77 4.98
 9 -12 -7 1.28 2.36
 9 -12 -6 5.67 3.85
 -9 12 6 -0.59 1.81
 -9 12 5 8.94 3.96
 -9 12 4 1.35 2.35
 -9 12 3 7.78 3.32
 -9 12 2 0.72 1.18
 -9 12 1 15.16 4.68
 -9 12 0 -2.89 2.75
 -9 12 -1 2.19 1.89
 -9 12 -2 5.28 3.5
 -9 12 -3 0.28 0.82
 -9 12 -4 -0.69 2.23
 -9 12 -5 2.64 2.45
 9 -13 -7 4.07 2.87
 9 -13 -6 -4.12 3.36
 -9 13 4 2.53 2.61
 -9 13 3 15.52 5.01
 -9 13 2 0.4 0.81
 -9 13 1 16.85 5.23
 -9 13 0 -0.73 1.04
 -9 13 -1 -1.99 2.27
 -9 13 -2 1.13 1.9
 -9 13 -3 -1.28 2.07
 10 0 -12 36.91 8.72
 10 0 -11 -1.38 2.53
 10 0 -10 33.64 7.25
 10 0 -9 -4.26 2.53
 10 0 -8 -0.81 1.75
 10 0 -7 -2.26 2.56
 10 0 -6 0.76 1.35
 -10 0 6 -0.3 0.69
 -10 0 5 2.95 2.34
 10 0 -5 -2.61 2.3
 -10 0 5 1.24 1.48
 -10 0 4 47.27 7.79
 10 0 -4 41.91 6.89
 -10 0 4 53.45 6.94
 -10 0 3 -0.21 1.06
 -10 0 3 2.25 2.53
 10 0 -3 1.5 2.41
 -10 0 2 14.43 3.57
 -10 0 2 11.74 3.51
 10 0 -2 18.77 4.79
 -10 0 1 0.34 0.8
 -10 0 1 1.52 1.68
 -10 0 0 293.59 18.23
 -10 0 0 272.35 15.07
 -10 0 -1 1.86 1.02
 -10 0 -2 131.45 10.81
 -10 0 -3 -0.36 0.8
 -10 0 -4 2.22 2.41
 -10 0 -5 3.67 2.93
 -10 0 -6 0.08 1.13
 -10 0 -7 0.34 1.19
 -10 0 -8 0.53 1.51
 -10 0 -9 2.17 2.45
 -10 0 -10 3.68 3.12
 10 -1 -12 -1.02 1.61
 10 1 -12 0.22 1.19
 10 -1 -11 1.16 1.44
 10 1 -11 5.08 3.15
 10 -1 -10 6.98 3.06
 10 1 -10 2.95 1.81
 10 -1 -9 19.51 5.23
 10 1 -9 22.36 5.74
 10 -1 -8 14.4 4.47
 10 -1 -7 35.95 6.88
 10 1 -7 35.7 6.93
 -10 1 7 32.78 6.01
 10 -1 -6 5 2.93
 10 1 -6 3.62 1.85
 -10 1 6 3.12 2.02
 -10 1 5 127.58 12.84
 -10 -1 5 117.16 12.42
 10 -1 -5 132.61 12.59
 10 1 -5 127.5 12.36
 -10 -1 5 138.24 10.64
 -10 1 5 135.29 11.97
 -10 -1 4 8.45 2.46
 -10 1 4 10.26 3.04
 -10 1 4 8.53 3.11
 -10 -1 4 14.12 4.01
 10 -1 -4 5.92 2.63
 10 1 -4 7.39 2.93
 -10 -1 3 22.72 4.08
 -10 1 3 20.68 4.28
 -10 1 3 21.83 4.95
 -10 -1 3 20.13 4.98
 10 -1 -3 24.01 5.32
 10 1 -3 21.02 4.99
 -10 -1 2 1.06 1.24
 -10 1 2 1.88 1.39
 -10 1 2 1.75 0.97
 -10 -1 2 -1.85 2.22
 10 -1 -2 1.12 1.29
 10 1 -2 3.07 2.21
 -10 -1 1 2.11 1.71
 -10 1 1 0.71 0.93
 -10 1 1 1.25 2.02
 -10 -1 1 4.41 2.85
 -10 1 0 8.22 2.37
 -10 -1 0 9.44 2.51
 -10 1 0 10.54 3.52
 -10 -1 0 13.34 4.01
 -10 1 -1 16.37 3.85
 -10 -1 -1 12.05 3.07
 -10 1 -2 62.8 7.57
 -10 -1 -2 57.91 7.22
 -10 1 -3 79.78 9.1
 -10 -1 -3 71.43 8.15
 -10 1 -4 -0.27 1.33
 -10 1 -5 -1.03 1.21
 -10 -1 -5 -0.25 1.43
 -10 1 -6 2.03 1.43
 -10 -1 -6 2.32 1.87
 -10 1 -7 11.12 4.14
 -10 -1 -7 5.91 2.93
 -10 1 -8 1.66 2.05
 -10 -1 -8 5.68 3.29
 -10 1 -9 -3.15 2.09
 -10 -1 -9 2.12 1.04
 -10 1 -10 -4.79 3.08
 -10 -1 -10 3.99 3.38
 10 2 -12 3.85 3.03
 10 -2 -11 7.35 3.78
 10 2 -11 6.97 3.54
 10 -2 -10 0.92 2.38
 10 2 -10 2.13 1.77
 10 -2 -9 1.71 1.17
 10 -2 -8 3.82 2.44
 10 -2 -7 7.46 2.91
 10 2 -7 6.68 2.92
 10 -2 -7 9.81 3.79
 -10 2 7 9.25 3.38
 10 -2 -6 17.9 5.05
 10 2 -6 14.12 4.33
 -10 2 6 14.81 4.34
 -10 2 5 2.33 1.61
 -10 2 5 3.8 2.52
 -10 -2 5 1.01 1.55
 10 -2 -5 3.28 2.37
 10 2 -5 5.24 2.8
 -10 2 4 0.86 1.42
 -10 2 4 -1.45 1.61
 -10 -2 4 -0.24 1.45
 10 -2 -4 -1.45 1.77
 10 2 -4 -2.05 1.58
 -10 -2 3 14.43 3
 -10 2 3 11.02 3.27
 -10 2 3 16.39 4.66
 -10 -2 3 16.55 4.57
 10 -2 -3 8.29 3.1
 10 2 -3 12.67 3.73
 -10 2 2 48.94 7.68
 -10 -2 2 55.57 8.37
 10 -2 -2 51.87 7.95
 10 2 -2 49.64 7.79
 -10 -2 2 60.39 6.31
 -10 2 2 46.91 6.66
 -10 2 1 59.24 8.24
 -10 -2 1 60.4 8.54
 -10 -2 1 60.26 6.16
 -10 2 1 58.39 7.36
 -10 2 0 96.1 10.36
 -10 -2 0 101.94 10.86
 -10 2 0 97.76 9.5
 -10 -2 0 101.85 8.46
 -10 2 -1 31.69 5.54
 -10 -2 -1 35.34 5.19
 -10 2 -2 65.08 8.02
 -10 -2 -2 66.21 7.54
 -10 2 -3 14.83 4.04
 -10 -2 -3 15.39 3.77
 -10 2 -4 3.96 2.4
 -10 2 -5 5.81 2.37
 -10 -2 -5 6.89 3.29
 -10 2 -5 2.79 2.12
 -10 2 -6 -1.66 1.88
 -10 -2 -6 2.76 2.78
 -10 2 -7 -1.7 1.36
 -10 -2 -7 -0.57 0.97
 -10 2 -8 2.37 1.86
 -10 -2 -8 2.39 2.18
 -10 2 -9 -0.95 1.23
 -10 -2 -9 2.96 2.26
 -10 2 -10 0.31 1.76
 -10 -2 -10 2.63 2.93
 10 3 -12 0.13 1.02
 10 -3 -11 2.05 2.32
 10 -3 -10 -0.07 1.06
 10 -3 -9 8.11 4.22
 10 3 -8 31.25 6.63
 10 -3 -8 44.19 8.06
 10 -3 -7 1.81 2.19
 10 3 -7 3.03 2.12
 10 -3 -7 1.63 1.2
 -10 3 7 3.84 2.46
 10 -3 -6 0.8 0.86
 10 3 -6 2.24 1.98
 -10 3 6 -1.38 1.08
 -10 3 5 29.51 5.38
 10 -3 -5 28.52 5.83
 10 3 -5 34.66 6.32
 -10 3 4 10.7 3.2
 -10 3 4 13.64 4.03
 -10 -3 4 14.24 4.3
 10 -3 -4 15.26 4.47
 10 3 -4 15.09 4.03
 -10 3 3 3.74 2.34
 -10 3 3 0.52 0.86
 -10 -3 3 0.82 1.14
 10 -3 -3 1.6 1.92
 10 3 -3 1.67 1.61
 -10 3 2 2.51 0.91
 -10 3 2 8.45 3.43
 -10 -3 2 7.09 3.06
 10 -3 -2 3.21 2.4
 10 3 -2 1.65 1.05
 -10 3 1 124.59 12.01
 -10 -3 1 139.17 13.27
 -10 3 1 134.59 11.29
 -10 3 0 5.31 2.04
 -10 -3 0 8.37 2.42
 -10 3 0 8.67 3.09
 -10 -3 0 9 3.5
 -10 3 -1 0.59 0.74
 -10 -3 -1 0.35 0.61
 -10 3 -2 15.95 4.32
 -10 -3 -2 18 3.83
 -10 3 -3 6.56 2.78
 -10 -3 -3 5.93 2
 -10 3 -4 2.39 1.57
 -10 3 -5 -0.79 1.1
 -10 -3 -5 3.15 2.11
 -10 3 -5 2.68 1.93
 -10 3 -6 9.51 3.81
 -10 -3 -6 13.1 4.41
 -10 3 -6 6.53 2.92
 -10 3 -7 7.82 3.46
 -10 -3 -7 7.77 3.25
 -10 3 -8 -2.51 2.16
 -10 -3 -8 0.73 1.93
 -10 3 -9 0 0.79
 -10 -3 -9 6.06 3.59
 -10 3 -10 2.42 3.07
 -10 -3 -10 3.29 3.08
 10 -4 -11 -6.55 3.61
 10 -4 -10 0.02 1.25
 10 -4 -9 1.77 1.65
 10 -4 -8 3.61 2.38
 10 4 -8 6.24 2.92
 10 -4 -8 8.79 3.82
 -10 4 8 4.21 1.5
 10 -4 -7 5.08 2.69
 10 4 -7 5.17 2.31
 10 -4 -7 6.97 3.68
 -10 4 7 7.92 3.33
 10 -4 -6 0.62 1.16
 10 4 -6 1.17 1.75
 10 -4 -6 0.65 1.07
 -10 4 6 -0.66 1.61
 -10 4 5 2.32 1.83
 10 -4 -5 -1.65 2.15
 10 4 -5 0.35 1.04
 -10 4 4 32.02 5.99
 -10 4 4 33.18 6.25
 -10 -4 4 33.99 6.74
 10 -4 -4 32.49 5.98
 10 4 -4 37.84 6.63
 -10 4 3 -0.62 1.39
 -10 4 3 -0.54 1.24
 -10 -4 3 -0.48 1.43
 10 -4 -3 -2.58 2.23
 10 4 -3 -4.44 2.53
 -10 4 2 21.61 5.06
 -10 4 2 24.41 5.24
 -10 -4 2 26.78 5.87
 10 -4 -2 21.8 5.06
 10 4 -2 23.8 5.39
 -10 4 1 76.89 9.34
 -10 -4 1 85.49 10.35
 -10 4 1 61.29 8.1
 -10 4 0 21.92 4.86
 -10 4 0 25.75 5.24
 -10 -4 0 22.88 5.23
 -10 4 -1 13.33 4
 -10 4 -1 14.3 3.85
 -10 4 -2 1.1 1.52
 -10 -4 -2 0.71 0.86
 -10 4 -3 16 4.48
 -10 4 -4 -0.09 1.43
 -10 4 -5 2.09 1.39
 -10 -4 -5 0.69 1.28
 -10 4 -5 0.98 1.26
 -10 4 -6 -1.96 2.36
 -10 4 -6 1.05 1.2
 -10 4 -7 3.37 2.3
 -10 -4 -7 1.55 2.39
 -10 4 -7 -1.22 2
 -10 4 -8 3.36 2.31
 -10 -4 -8 0 2.78
 -10 4 -9 4.14 3.4
 -10 -4 -9 -3.58 2.68
 -10 4 -10 0.37 1.45
 -10 -4 -10 0 2.24
 10 -5 -10 4.99 3.82
 10 -5 -9 8.71 3.79
 10 -5 -8 0.06 1.36
 10 5 -8 -0.87 0.67
 -10 5 8 -0.21 1.21
 10 -5 -7 0.74 1.74
 10 5 -7 5.01 2.81
 10 -5 -7 -1.4 1.36
 -10 5 7 3.59 1.6
 10 -5 -6 14.92 4.7
 10 5 -6 19.54 4.95
 10 -5 -6 22.39 6.03
 -10 5 6 19.45 4.91
 -10 5 5 1.12 0.9
 10 -5 -5 -0.95 1.91
 10 5 -5 3.06 2.08
 -10 5 4 3.98 2.34
 -10 5 4 5.38 2.64
 -10 -5 4 4.95 2.72
 10 -5 -4 2.99 1.57
 10 5 -4 5.02 2.6
 -10 5 3 48.94 7.39
 -10 -5 3 54.46 8.47
 10 -5 -3 61.25 8.43
 10 5 -3 51.92 7.77
 -10 5 3 46.45 7.35
 -10 5 2 4.25 2.28
 -10 5 2 6.44 2.71
 -10 -5 2 7.92 3.56
 -10 5 1 18 4.47
 -10 5 1 19.52 4.83
 -10 -5 1 21.27 5.32
 -10 5 0 17.77 4.58
 -10 5 0 15.33 4.1
 -10 -5 0 15.53 4.48
 -10 5 -1 6.76 2.74
 -10 5 -1 8.62 3.42
 -10 -5 -1 7.25 3.39
 -10 5 -2 1.61 1.49
 -10 5 -3 36.56 6.59
 -10 5 -4 1.72 1.54
 -10 5 -5 2.74 1.91
 -10 -5 -5 2.45 2.17
 -10 5 -5 3.48 2.22
 -10 5 -6 8.18 3.46
 -10 -5 -6 4.51 2.4
 -10 5 -6 0.81 0.93
 -10 5 -7 0.11 0.74
 -10 -5 -7 0.12 1.26
 -10 5 -8 -2.34 2.44
 -10 5 -8 -5.42 3
 -10 -5 -8 -1.89 1.64
 -10 5 -9 -9.37 4.01
 -10 -5 -9 -2.38 2.23
 -10 5 -10 2.3 2.58
 -10 -5 -10 4.22 4.04
 10 -6 -10 16.21 5.68
 10 -6 -9 -2.22 1.96
 10 6 -9 2.25 2.13
 10 -6 -9 -3.5 3.5
 10 -6 -8 0.92 1.27
 10 6 -8 1.45 2.26
 10 -6 -8 -3.95 3.27
 -10 6 8 -0.02 1.15
 10 -6 -7 -0.75 1.15
 10 6 -7 3.12 1.97
 10 -6 -7 3.82 2.57
 -10 6 7 0.7 1.71
 -10 6 6 -0.25 1.1
 10 -6 -6 1.18 2.09
 10 6 -6 5.61 2.83
 10 -6 -6 4.78 2.82
 -10 6 5 3.66 2.29
 10 -6 -5 5.08 2.51
 10 6 -5 5.82 2.81
 -10 6 4 16.42 4.53
 -10 6 4 16.27 4.27
 -10 -6 4 20.93 5.28
 10 -6 -4 18.53 4.79
 10 6 -4 17.24 4.47
 -10 6 3 3.97 2.19
 -10 6 3 4.7 2.04
 -10 -6 3 7.25 3.29
 10 -6 -3 3.3 1.74
 10 6 -3 4.37 1.93
 -10 6 2 1.74 1.19
 -10 6 2 0.32 1.29
 -10 -6 2 2.11 1.63
 -10 6 1 26.16 5.61
 -10 6 1 28.04 5.74
 -10 -6 1 30.29 6.42
 -10 6 0 68.04 8.72
 -10 -6 0 81.96 10.34
 -10 6 0 67.18 9.02
 -10 6 -1 -2.08 2.01
 -10 6 -1 2.32 1.5
 -10 -6 -1 -0.09 0.84
 -10 6 -2 0.32 0.9
 -10 6 -3 1.85 1.32
 -10 6 -4 16.79 4.78
 -10 6 -5 1.89 1.99
 -10 6 -6 -0.9 1.15
 -10 -6 -6 -3.06 2.37
 -10 6 -6 -1.9 1.93
 -10 6 -7 -2.41 1.9
 -10 -6 -7 1.02 1.56
 -10 6 -7 0.2 1.24
 -10 6 -8 -4.56 2.73
 -10 -6 -8 0 1.62
 -10 6 -9 0.86 2.43
 -10 6 -9 -1.53 1.71
 -10 -6 -9 -1.34 1.78
 -10 6 -10 -1.39 1.65
 -10 -6 -10 -3.54 2.77
 10 7 -10 0.35 1.82
 10 -7 -9 -0.62 1.09
 10 7 -9 0.71 1.51
 10 -7 -9 -0.44 1.39
 10 -7 -8 0 1.14
 10 7 -8 4.16 2.4
 10 -7 -8 6.71 3.81
 -10 7 8 3.31 2.52
 10 -7 -7 3.73 2.98
 10 7 -7 9.25 3.62
 10 -7 -7 8.91 3.68
 -10 7 7 2.47 1.04
 -10 7 6 17.7 5
 10 -7 -6 6.65 3.06
 10 7 -6 17.17 4.72
 10 -7 -6 21.48 5.62
 -10 7 5 0.68 0.93
 10 -7 -5 -2.07 1.95
 -10 7 4 1.23 1.26
 -10 -7 4 3.74 2.06
 10 -7 -4 1.17 1.74
 10 7 -4 2.77 1.63
 -10 7 3 -0.39 0.7
 -10 7 3 0.75 1.27
 -10 -7 3 1.12 1.63
 10 -7 -3 -0.75 1.4
 10 7 -3 -0.3 1.2
 -10 7 2 0.84 1.26
 -10 7 2 1.79 1.45
 -10 -7 2 3.32 2.22
 -10 7 1 13.22 4.03
 -10 7 1 17.9 4.46
 -10 -7 1 17.86 4.55
 -10 7 0 5.81 2.67
 -10 7 0 10.8 3.43
 -10 -7 0 9.21 3.4
 -10 7 -1 12.07 4.09
 -10 7 -1 13.31 3.77
 -10 -7 -1 7.72 2.85
 -10 7 -2 -1.13 1.35
 -10 7 -2 -1.85 1.46
 -10 7 -3 0.86 1.73
 -10 7 -4 1.68 1.86
 -10 7 -5 -0.38 0.86
 -10 7 -6 0.48 1.08
 -10 -7 -6 5.98 3.47
 -10 7 -6 9.73 3.85
 -10 7 -7 2.03 2.14
 -10 -7 -7 -1.17 2.29
 -10 7 -7 1.49 2.47
 -10 7 -8 -1.8 1.72
 -10 -7 -8 1.85 2.92
 -10 7 -8 5.9 3.65
 -10 7 -9 4.02 3.34
 -10 -7 -9 1.25 2.85
 10 -8 -10 5.73 3.19
 10 8 -10 7.5 4.08
 10 -8 -9 1.1 1.48
 10 8 -9 0.22 1.01
 10 -8 -9 -0.91 1.66
 -10 8 9 -1.43 1.69
 10 -8 -8 9.32 4.5
 10 8 -8 10.54 3.88
 10 -8 -8 11.77 4.85
 -10 8 8 7.21 3.69
 10 -8 -7 1.61 1.76
 10 8 -7 5.08 2.62
 10 -8 -7 3.05 3.17
 -10 8 7 2.3 1.78
 -10 8 6 16.45 4.99
 10 -8 -6 2.18 1.44
 10 8 -6 9.4 3.44
 10 -8 -6 9.34 4.14
 -10 8 5 0.08 1.33
 10 -8 -5 -1.86 2.48
 10 8 -5 0.6 1.15
 -10 8 4 1.38 1.3
 10 -8 -4 1.38 1.27
 10 8 -4 2.99 1.81
 -10 8 3 0.66 1.16
 -10 8 3 2.75 1.87
 -10 -8 3 0.37 2.24
 -10 8 2 3.63 2.28
 -10 8 2 1.33 1.54
 -10 -8 2 2.15 2.12
 -10 8 1 20.53 5.16
 -10 8 1 27.51 5.31
 -10 -8 1 31.21 6.31
 -10 8 0 0.74 0.95
 -10 8 0 1.39 1.59
 -10 -8 0 0.98 1.7
 -10 8 -1 10.42 3.78
 -10 8 -1 10.95 3.68
 -10 -8 -1 8.78 3.25
 -10 8 -2 6.51 3.07
 -10 8 -2 5.92 2.61
 -10 -8 -2 3.92 1.77
 -10 8 -3 3.69 1.92
 -10 8 -4 0.49 0.99
 -10 8 -5 -2.08 2.15
 -10 8 -6 0.05 0.78
 -10 8 -7 2.05 1.98
 -10 -8 -7 -1.22 1.55
 -10 8 -7 -1.22 1.42
 -10 8 -8 2.67 2.28
 -10 -8 -8 0 0.98
 -10 8 -8 1.96 2.18
 -10 8 -9 -0.44 0.97
 -10 -8 -9 0 0.85
 10 -9 -10 -1.55 1.71
 10 9 -10 0 1.1
 10 -9 -9 0.87 1.4
 10 9 -9 2.42 2.07
 10 -9 -8 -1.02 1.42
 10 9 -8 0.29 0.47
 10 -9 -8 -1.58 1.93
 -10 9 8 1.65 1.74
 10 9 -7 -1.39 1.76
 10 -9 -7 -1.44 1.77
 -10 9 7 0.97 2
 -10 9 6 0.15 0.78
 10 -9 -6 3.29 2.46
 10 9 -6 2.01 1.8
 -10 9 5 -1.24 1.2
 10 -9 -5 -0.91 1.75
 10 9 -5 -1.37 1.62
 -10 9 4 6.44 3.08
 10 -9 -4 3.03 2.7
 10 9 -4 4.23 2.25
 -10 9 3 2.12 1.47
 -10 9 3 3.82 1.95
 -10 -9 3 2.76 1.79
 -10 9 2 5.72 2.93
 -10 9 2 3.69 1.49
 -10 -9 2 4.36 2.4
 -10 9 1 6.57 3.21
 -10 9 1 3.73 1.74
 -10 -9 1 8.82 3.25
 -10 9 0 1.05 1.21
 -10 9 0 -0.03 1.29
 -10 -9 0 -0.36 1.89
 -10 9 -1 10.64 3.8
 -10 9 -1 13.04 3.64
 -10 -9 -1 14.31 4.55
 -10 9 -2 8.01 2.97
 -10 9 -2 6.61 2.63
 -10 -9 -2 6.65 2.69
 -10 9 -3 3.01 2.73
 -10 9 -4 5.96 2.81
 -10 9 -5 0.59 1.28
 -10 9 -6 -1.67 1.9
 -10 -9 -7 -0.75 1.26
 -10 9 -7 0.96 1.72
 -10 9 -8 0.56 1.37
 -10 -9 -8 3.32 3.66
 -10 9 -9 0.59 1.97
 -10 -9 -9 1.11 1.57
 10 -10 -8 2.85 3.84
 10 -10 -7 2.54 2.99
 -10 10 7 0.77 0.98
 -10 10 6 2.35 1.28
 10 -10 -6 6.56 3.33
 10 10 -6 4.85 2.44
 10 -10 -6 1.02 2.47
 -10 10 5 3.19 2.68
 10 -10 -5 2.75 2.37
 10 10 -5 -0.42 0.96
 -10 10 4 -0.82 1.63
 -10 10 3 -0.39 0.72
 -10 10 2 1.06 2.07
 -10 10 2 2.92 2.14
 -10 -10 2 1.22 1.54
 -10 10 1 4.91 2.87
 -10 10 1 3.06 1.96
 -10 -10 1 0.3 0.73
 -10 10 0 4.72 2.21
 -10 10 0 7.26 3.06
 -10 -10 0 5.66 2.55
 -10 10 -1 -0.94 1.33
 -10 10 -1 1.75 0.99
 -10 -10 -1 2.6 1.98
 -10 10 -2 3.13 1.96
 -10 10 -2 0.54 0.66
 -10 -10 -2 5.13 2.71
 -10 10 -3 0.71 1.54
 -10 -10 -3 -0.16 0.78
 -10 10 -4 -1.94 2.05
 -10 10 -5 4.05 2.43
 -10 10 -6 0.08 1.43
 10 -11 -7 -18.13 5.92
 -10 11 6 2.7 2.43
 -10 11 5 2.38 2.15
 -10 11 4 3.33 2.51
 -10 11 3 -0.68 0.8
 -10 11 2 0.09 1.64
 -10 11 1 0.24 1.15
 -10 11 0 -1.42 1.48
 -10 11 -1 -3.54 2.48
 -10 11 -2 -1.66 1.51
 -10 11 -3 -2.89 3.22
 -10 11 -4 -2.13 2.88
 -10 11 -5 5.06 3.08
 -10 12 4 6.11 3.45
 -10 12 3 -0.2 0.67
 -10 12 2 2.81 2.21
 -10 12 1 2.33 2.51
 -10 12 0 -0.73 1.68
 -10 12 -1 4.64 2.4
 -10 12 -2 2.47 2.44
 -10 12 -3 1.68 1.92
 11 0 -11 30.6 7.94
 11 0 -9 0.36 1.08
 11 0 -8 1.3 1.09
 11 0 -7 -1.51 1.5
 11 0 -6 1.46 2.8
 -11 0 5 13.4 4.7
 11 0 -5 12.24 3.91
 -11 0 4 0.52 0.89
 -11 0 4 1.93 1.89
 -11 0 3 14.98 3.52
 -11 0 3 16.61 4.87
 11 0 -3 18.02 5.21
 -11 0 2 -0.13 0.92
 -11 0 2 5.7 3.05
 -11 0 1 68.34 9.57
 -11 0 1 55.87 7.03
 -11 0 0 1.23 1.22
 -11 0 0 2.1 1.62
 -11 0 -1 5.76 2.65
 -11 0 -1 5.95 2.97
 -11 0 -2 0.24 1.45
 -11 0 -3 1.95 1.96
 -11 0 -4 -0.27 1.24
 -11 0 -5 -0.57 1.71
 -11 0 -6 2.13 2.17
 -11 0 -7 3.47 2.77
 -11 0 -8 3.89 3.64
 -11 0 -9 6.83 3.63
 11 -1 -11 2.04 2.21
 11 -1 -10 0.97 2.04
 11 -1 -9 -0.09 1.88
 11 1 -9 1.24 2.5
 11 -1 -8 38.02 7.61
 11 1 -8 41.23 7.98
 11 -1 -7 -0.26 1.64
 11 1 -7 2.68 1.55
 11 -1 -6 52.32 8.64
 11 1 -6 51.84 8.46
 -11 1 6 51.33 7.5
 -11 1 5 1.24 2.05
 -11 1 5 1.7 2.03
 -11 -1 5 -1.77 1.9
 11 -1 -5 1.83 1.4
 11 1 -5 0.23 0.92
 -11 1 4 29.17 5.42
 -11 1 4 35.93 7.1
 -11 -1 4 37.06 7.32
 11 -1 -4 34.3 6.65
 11 1 -4 32.23 6.57
 -11 1 3 1.92 1.61
 -11 1 3 0.88 1.3
 -11 -1 3 3.49 2.44
 11 -1 -3 5.29 3.01
 11 1 -3 4.24 2.84
 -11 1 2 45.03 7.96
 -11 -1 2 45.36 7.91
 -11 -1 2 47.13 6.12
 -11 1 2 41.51 6.49
 -11 -1 1 13.53 3.24
 -11 1 1 13.79 3.74
 -11 1 1 16.97 4.7
 -11 -1 1 20.63 5.29
 -11 1 0 13.47 3.85
 -11 -1 0 13.57 3.51
 -11 1 0 13.52 4.43
 -11 -1 0 13.09 4.13
 -11 1 -1 10.84 3.34
 -11 -1 -1 6.65 2.29
 -11 1 -1 9.17 3.51
 -11 -1 -1 9.49 3.51
 -11 1 -2 2.87 2.24
 -11 -1 -2 1.42 1.17
 -11 1 -3 21.18 4.6
 -11 -1 -3 20.59 4.76
 -11 1 -4 2.9 2.72
 -11 -1 -4 4.56 2.38
 -11 1 -5 2.51 1.33
 -11 1 -6 18.27 5.39
 -11 -1 -6 18.49 5.56
 -11 1 -7 4.11 3.07
 -11 -1 -7 -0.04 0.88
 -11 1 -8 0 1.14
 -11 -1 -8 0 0.89
 -11 1 -9 1.4 1.31
 -11 -1 -9 1.47 2.11
 11 -2 -10 4.74 2.71
 11 -2 -9 -4.64 2.9
 11 2 -9 0.47 1.2
 11 -2 -9 -2.22 2.21
 11 -2 -8 6.44 3.5
 11 2 -8 6.82 3.36
 11 -2 -7 -0.15 1.76
 11 2 -7 8.6 4.06
 -11 2 7 6.89 3.2
 11 -2 -6 4.23 2.39
 11 2 -6 6.78 3.25
 -11 2 6 6.25 2.06
 -11 2 5 7.57 3.07
 -11 2 5 7.2 3.05
 -11 -2 5 6.69 3.52
 11 -2 -5 8.46 3.13
 11 2 -5 5.96 2.32
 -11 2 4 6.36 2.81
 -11 2 4 3.81 2.46
 -11 -2 4 5.54 2.99
 11 -2 -4 10.97 3.68
 11 2 -4 5.44 2.48
 -11 2 3 9.99 3.43
 -11 2 3 6.43 3.47
 -11 -2 3 4.25 2.24
 11 -2 -3 9.4 3.56
 11 2 -3 9.73 3.44
 -11 2 2 7.7 3.3
 -11 2 2 6.25 2.98
 -11 -2 2 4.02 3.29
 -11 2 1 58.05 8.82
 -11 -2 1 58.39 8.94
 -11 2 1 49.52 7.09
 -11 -2 0 8.3 2.31
 -11 2 0 8.98 3.05
 -11 2 0 6.53 2.72
 -11 -2 0 7.86 3.3
 -11 2 -1 15.04 3.72
 -11 -2 -1 14.4 3.48
 -11 2 -1 15.14 4.62
 -11 -2 -1 20.06 5.12
 -11 2 -2 2.2 1.58
 -11 -2 -2 2.96 1.64
 -11 2 -3 1.85 1.7
 -11 -2 -3 3.02 2.04
 -11 2 -4 7.36 2.96
 -11 -2 -4 4.18 1.76
 -11 2 -5 1.28 1.55
 -11 2 -6 0.39 0.69
 -11 -2 -6 4.31 2.84
 -11 2 -6 1.02 1.76
 -11 2 -7 -1.57 1.8
 -11 -2 -7 1.12 2.41
 -11 2 -8 0 1.53
 -11 -2 -8 -2.73 2.52
 -11 2 -9 22.59 7.11
 -11 -2 -9 23.61 7.28
 11 -3 -10 13.51 5.33
 11 3 -10 12.95 5.53
 11 -3 -10 12.85 5.05
 11 3 -9 -2.12 2.03
 11 -3 -9 1.78 1.24
 11 -3 -8 2.41 2.37
 11 3 -8 0.87 1.72
 11 -3 -7 14.69 4.64
 11 3 -7 19.21 5.36
 -11 3 7 13.83 4.5
 11 -3 -6 -0.7 1.01
 11 3 -6 -2.51 3.06
 -11 3 6 0.18 1.09
 -11 3 5 11.52 3.89
 -11 -3 5 10.57 3.95
 11 -3 -5 8.83 3.35
 11 3 -5 17.53 4.85
 -11 3 4 4.85 2.51
 -11 3 4 4.57 2.56
 -11 -3 4 5.98 3.09
 11 -3 -4 7.83 3.55
 11 3 -4 8.82 3.46
 -11 3 3 91.07 10.79
 -11 -3 3 101.78 11.82
 11 -3 -3 93.06 11.22
 11 3 -3 95.48 11.36
 -11 3 3 77.88 8.98
 -11 3 2 6.67 2.49
 -11 3 2 7.1 3.36
 -11 -3 2 6.16 3.03
 -11 3 1 0.23 1.34
 -11 3 1 0.68 1.27
 -11 -3 1 0.81 2.03
 -11 3 0 6.78 2.58
 -11 3 0 7.5 3.17
 -11 -3 0 10.81 3.97
 -11 3 -1 -0.13 1.38
 -11 3 -1 2.37 2.18
 -11 -3 -1 -0.55 1.39
 -11 3 -2 18.11 4.57
 -11 3 -3 2.55 2.03
 -11 -3 -3 4.84 2.32
 -11 3 -4 -0.46 1.12
 -11 -3 -4 -1.5 1.65
 -11 3 -5 -3.67 2.33
 -11 3 -6 1.25 1.59
 -11 -3 -6 1.23 1.65
 -11 3 -6 1.35 1.6
 -11 3 -7 3.14 2.17
 -11 -3 -7 -1.13 1.59
 -11 3 -7 3.63 3.1
 -11 3 -8 -2.7 2.27
 -11 -3 -8 6.92 4.5
 -11 3 -9 -3.61 2.72
 -11 -3 -9 -8.61 4.3
 11 -4 -10 1.98 2.62
 11 4 -10 4.95 3.15
 11 -4 -9 2.77 1.82
 11 4 -9 4.18 2.84
 11 -4 -9 1.11 1.23
 11 -4 -8 4 2.77
 11 4 -8 1.87 1.18
 11 -4 -8 3.46 3.71
 -11 4 8 1.35 1.32
 11 -4 -7 -0.41 0.86
 11 4 -7 -1.27 1.74
 -11 4 7 -0.53 0.8
 11 -4 -6 0.59 1.98
 11 4 -6 -1.07 1.26
 -11 4 6 0.33 0.71
 -11 4 5 2.22 2.28
 11 -4 -5 4.39 2.06
 11 4 -5 2.6 1.98
 -11 4 4 27.01 5.32
 -11 4 4 29.81 6.15
 -11 -4 4 32.56 6.98
 11 -4 -4 29.88 6.29
 11 4 -4 38.05 6.97
 -11 4 3 -0.07 1.66
 -11 4 3 2.92 2.36
 -11 -4 3 6.58 2.94
 11 -4 -3 1.45 1.17
 11 4 -3 4.79 2.53
 -11 4 2 -1.79 2.03
 -11 4 2 0.1 1.19
 -11 -4 2 -0.79 2.06
 -11 4 1 13.36 4.01
 -11 4 1 11.82 4.14
 -11 -4 1 11.84 4.49
 -11 4 0 8.83 3.41
 -11 4 0 5.28 2.66
 -11 -4 0 4.28 2.37
 -11 4 -1 28.68 5.83
 -11 4 -1 27.59 5.72
 -11 -4 -1 23.51 5.63
 -11 4 -2 -1.97 2.02
 -11 4 -3 3.67 1.98
 -11 4 -4 6.64 2.55
 -11 4 -5 1.69 1.75
 -11 4 -6 1.59 2.05
 -11 -4 -6 3.38 3.01
 -11 4 -6 -1.97 1.45
 -11 4 -7 -0.39 1.03
 -11 -4 -7 -0.62 1.33
 -11 4 -7 2.41 1.93
 -11 -4 -8 -0.31 1.1
 -11 4 -8 -2 2.35
 -11 4 -9 5.6 4.09
 -11 -4 -9 5.99 4.59
 -11 4 -9 3.25 2.68
 11 -5 -10 0.79 1.35
 11 5 -10 -4.77 2.97
 11 -5 -9 0 1.29
 11 5 -9 1.93 1.78
 11 -5 -9 5.32 3.09
 11 -5 -8 9.06 4.16
 11 5 -8 26.16 6.71
 11 -5 -8 28.7 7.24
 -11 5 8 18.47 5.39
 11 -5 -7 1.85 1.93
 11 5 -7 2.47 2.21
 -11 5 7 0.76 1.13
 11 -5 -6 14.36 4.71
 11 5 -6 33.78 6.92
 -11 5 6 30.16 6.58
 -11 5 5 3.02 1.74
 11 -5 -5 3.36 2.04
 11 5 -5 3.53 1.81
 -11 5 4 38.79 6.64
 -11 5 4 42.24 7.4
 -11 -5 4 54.73 9.05
 11 -5 -4 25.81 6.2
 11 5 -4 52.95 8.29
 -11 5 3 19.39 4.77
 -11 5 3 14.81 4.29
 -11 -5 3 16.49 4.77
 11 -5 -3 17.13 5.07
 11 5 -3 15.21 4.6
 -11 5 2 39.17 6.94
 -11 5 2 35.88 6.76
 -11 -5 2 44.86 8.18
 -11 5 1 5.09 2.82
 -11 5 1 3.36 1.7
 -11 -5 1 1.24 1.22
 -11 5 0 -0.58 1.42
 -11 5 0 1.69 1.76
 -11 -5 0 2.4 2.23
 -11 5 -1 13.24 3.91
 -11 5 -1 10.94 3.61
 -11 -5 -1 8.48 3.31
 -11 5 -2 2.52 1.82
 -11 5 -3 1.58 1.44
 -11 5 -4 10.31 3.76
 -11 5 -5 1.72 1.59
 -11 5 -6 3.97 2.35
 -11 5 -7 -3.03 2.26
 -11 -5 -7 1.47 2.03
 -11 5 -7 -1.66 1.54
 -11 5 -8 -3.03 2.29
 -11 -5 -8 1.42 2.21
 -11 5 -8 1.05 1.01
 -11 5 -9 0 1.1
 -11 -5 -9 0 1.43
 11 -6 -9 4.28 3.52
 11 6 -9 3.26 2.41
 11 -6 -9 3.46 2.39
 11 -6 -8 0.79 1.26
 11 6 -8 3.65 2.84
 -11 6 8 1.82 1.92
 11 -6 -7 -2.58 2.05
 11 6 -7 -3.98 2.49
 -11 6 7 -1.59 2.11
 -11 6 6 4.43 2.37
 11 -6 -6 0 1.39
 11 6 -6 5.78 2.89
 -11 6 5 -1.28 2.09
 11 -6 -5 -0.39 1.53
 11 6 -5 -3.26 1.98
 -11 6 4 -0.01 1.86
 -11 6 4 -1.01 1.78
 -11 -6 4 3.14 2.26
 11 -6 -4 1.67 1.99
 11 6 -4 0.95 1.79
 -11 6 3 0.97 1
 -11 6 3 1.88 2.11
 -11 -6 3 -0.77 1.43
 11 -6 -3 3.72 3.37
 -11 6 2 4.33 1.73
 -11 6 2 4.45 3.06
 -11 -6 2 5.35 2.89
 -11 6 1 1.49 1.63
 -11 6 1 1.08 1.31
 -11 -6 1 1.55 1.42
 -11 6 0 -1.23 1.57
 -11 6 0 0.51 0.9
 -11 -6 0 -0.87 1.45
 -11 6 -1 51.91 8.14
 -11 6 -1 62.34 8.54
 -11 -6 -1 70.73 9.87
 -11 6 -2 3.37 1.67
 -11 6 -2 7.01 2.86
 -11 -6 -2 8.45 3.78
 -11 6 -3 1.92 1.56
 -11 6 -4 1.15 0.87
 -11 6 -5 -2.95 2.45
 -11 6 -6 -5.63 3.27
 -11 6 -7 0.54 0.58
 -11 -6 -7 2.48 2.67
 -11 6 -7 -0.96 1.86
 -11 6 -8 -1.39 1.61
 -11 -6 -8 2.92 2.96
 -11 6 -8 3.59 2.87
 11 -7 -9 -1.45 1.7
 11 7 -9 0.95 1.65
 -11 7 9 0.42 1.37
 11 -7 -8 0 1.18
 11 7 -8 1.51 1.61
 11 -7 -8 3.14 2.67
 -11 7 8 -0.18 0.84
 11 -7 -7 0 1.48
 11 7 -7 1.53 1.68
 -11 7 7 -1.09 2.07
 -11 7 6 -2.62 2.26
 11 -7 -6 -0.36 0.96
 11 7 -6 0.46 1
 -11 7 5 -1.59 2.05
 11 -7 -5 2.35 2.48
 11 7 -5 0.31 1.23
 -11 7 4 7.06 2.89
 -11 -7 4 6.71 3.55
 11 -7 -4 3.32 2.81
 11 7 -4 11.24 3.94
 -11 7 3 1.95 2.13
 -11 7 3 1.05 1.49
 -11 -7 3 2.02 2.15
 -11 7 2 2.12 1.62
 -11 7 2 -0.3 1.24
 -11 -7 2 4.24 2.12
 -11 7 1 1.22 1.73
 -11 7 1 1.11 0.73
 -11 7 0 3.96 1.66
 -11 7 0 3.4 2.13
 -11 -7 0 6.34 3.48
 -11 7 -1 15.71 4.36
 -11 7 -1 13.7 3.96
 -11 -7 -1 17.43 4.81
 -11 7 -2 3.78 2.09
 -11 7 -2 2.41 2.1
 -11 -7 -2 7.03 3.22
 -11 7 -3 3.11 2.11
 -11 7 -4 2.72 2.15
 -11 7 -5 1.94 1.94
 -11 7 -6 0.86 1.43
 -11 7 -7 -0.44 0.86
 -11 7 -8 -1.27 2.32
 -11 -7 -8 0 0.87
 11 -8 -9 7.54 3.66
 11 8 -9 5.91 3.57
 11 -8 -8 8.06 4.35
 11 8 -8 10.28 4.12
 -11 8 8 7.93 3.87
 11 -8 -7 1.71 1.71
 11 8 -7 0.78 1.69
 -11 8 7 0.32 1.51
 -11 8 6 3.62 2.62
 11 -8 -6 4.79 2.61
 11 8 -6 3.17 2.33
 -11 8 5 -2.03 1.97
 11 -8 -5 2.23 1.91
 11 8 -5 -0.22 1.16
 -11 8 4 0.48 0.64
 11 -8 -4 0.32 0.94
 11 8 -4 -1.44 1.93
 -11 8 3 1.85 1.81
 -11 8 3 0.86 1.03
 -11 -8 3 -1.95 1.49
 -11 8 2 -1.48 1.47
 -11 8 2 2.35 2.01
 -11 -8 2 -0.07 0.74
 -11 8 1 0.73 0.95
 -11 8 1 0.56 0.67
 -11 -8 1 1.77 0.75
 -11 8 0 15.82 4.44
 -11 8 0 7.2 3.16
 -11 -8 0 10.95 3.52
 -11 8 -1 10.66 3.91
 -11 8 -1 9.46 3.27
 -11 -8 -1 8.03 3.15
 -11 8 -2 6.28 3.1
 -11 8 -2 3.47 2.13
 -11 -8 -2 2.24 2.04
 -11 8 -3 6.19 3.11
 -11 8 -3 3.95 2.21
 -11 8 -4 6.86 3.17
 -11 8 -5 -0.36 1.35
 -11 8 -6 1.51 1.27
 -11 8 -8 1.29 2.21
 -11 -8 -8 0 1.13
 11 -9 -9 -2.42 2.11
 11 9 -9 -0.94 1.17
 11 -9 -8 3.75 2.83
 11 9 -8 7.58 3.79
 11 -9 -7 -0.01 0.85
 -11 9 7 1.85 2.07
 -11 9 6 -0.26 0.69
 11 -9 -6 -1.97 1.9
 11 9 -6 0.79 1.43
 -11 9 5 3.02 2.54
 11 9 -5 0.44 1.13
 -11 9 4 15.55 4.72
 -11 9 3 7.09 3.12
 -11 9 3 4.44 2.44
 -11 -9 3 8.71 3.96
 -11 9 2 25.68 6.05
 -11 9 2 10.73 3.62
 -11 -9 2 19.78 5.64
 -11 9 1 -2.48 2.05
 -11 9 1 0.59 1.27
 -11 9 0 -1.77 1.88
 -11 9 0 -0.42 0.84
 -11 -9 0 -0.26 1.23
 -11 9 -1 0.49 1.19
 -11 9 -1 -0.93 1.05
 -11 -9 -1 1.32 1.75
 -11 9 -2 1.8 1.47
 -11 9 -2 -1.5 1.69
 -11 -9 -2 -3.31 2.52
 -11 9 -3 7.19 3.35
 -11 9 -3 2.42 1.91
 -11 -9 -3 4.85 3.19
 -11 9 -4 0.86 1.35
 -11 9 -5 0.08 0.62
 -11 10 6 -1.83 1.91
 -11 10 5 16.12 5.3
 -11 10 4 -3.61 2.47
 -11 10 3 2.81 1.73
 -11 10 2 0.13 1.35
 -11 -10 2 0.31 0.85
 -11 10 1 0.04 1.41
 -11 -10 1 -1.88 1.79
 -11 10 0 -2.2 2.15
 -11 -10 0 -2.01 2.21
 -11 10 -1 -1.45 1.48
 -11 -10 -1 0.75 1.64
 -11 10 -2 2.09 1.88
 -11 -10 -2 0.62 1.07
 -11 10 -3 0.8 1.63
 -11 10 -4 8.19 3.72
 -11 11 4 10.56 4.51
 -11 11 3 -0.65 2.27
 -11 11 2 9.09 3.72
 -11 11 1 -0.74 0.66
 -11 11 0 3.19 2.68
 -11 11 -1 0.66 1.78
 -11 11 -2 4.19 2.76
 12 0 -9 5.54 3.48
 12 0 -8 0.55 1.31
 12 0 -7 5.6 3.34
 12 0 -6 -0.29 1.45
 -12 0 5 -0.98 1.47
 12 0 -5 -2.06 1.18
 -12 0 4 5.33 2.81
 12 0 -4 0.22 1.52
 -12 0 3 3.25 1.94
 12 0 -3 1.35 1.36
 -12 0 2 55.61 9.07
 -12 0 1 -1.05 1.59
 -12 0 1 0.37 1.81
 -12 0 0 88.13 11.12
 -12 0 0 83.7 9.31
 -12 0 -1 0.04 1.24
 -12 0 -1 0.11 0.97
 -12 0 -2 1.86 2.25
 -12 0 -3 2.17 1.45
 -12 0 -4 0.49 1.34
 -12 0 -5 0.3 2.02
 -12 0 -6 5.57 2.59
 -12 0 -7 0.15 1.8
 12 -1 -9 27.48 7.7
 12 1 -9 25.22 7.3
 12 -1 -8 4.5 3.48
 12 1 -8 -0.65 1.34
 12 -1 -7 4.53 3.21
 12 1 -7 -5.22 3
 12 -1 -6 4.59 2.88
 12 1 -6 2.95 2.7
 -12 1 5 11.71 4.16
 -12 -1 5 15.85 5.11
 12 -1 -5 10 3.61
 12 1 -5 16.93 5.03
 -12 1 4 0.62 2.46
 -12 -1 4 2.86 2.62
 12 -1 -4 0.37 1.01
 12 1 -4 -3.6 2.42
 -12 1 3 4.52 2.39
 -12 1 3 4.34 2.54
 -12 -1 3 -3.55 3.18
 12 -1 -3 5.01 2.69
 12 1 -3 4.99 2.53
 -12 1 2 2.87 2.01
 -12 1 2 0.94 1.18
 -12 -1 2 -0.24 1.75
 -12 1 1 5.04 2.17
 -12 1 1 5.61 3.37
 -12 -1 1 5.44 2.61
 -12 1 0 -0.48 1.48
 -12 1 0 0.02 1.55
 -12 -1 0 1.4 1.84
 -12 1 -1 1.64 1.34
 -12 -1 -1 2.38 1.75
 -12 1 -1 2.92 2.61
 -12 -1 -1 0.19 0.98
 -12 1 -2 0.66 0.83
 -12 -1 -2 1.68 1.35
 -12 1 -3 2.82 1.22
 -12 -1 -3 6.4 2.73
 -12 1 -4 2.77 1.87
 -12 -1 -4 0.12 1.07
 -12 1 -5 0.94 1.36
 -12 -1 -5 1.55 1.62
 -12 1 -6 -0.64 0.72
 -12 -1 -6 -0.31 1.07
 -12 1 -7 2.78 2.48
 -12 -1 -7 6.21 3.69
 -12 1 -7 6.57 3.55
 12 -2 -9 6.99 4.38
 12 2 -9 4.05 2.75
 12 -2 -8 3.8 2.96
 12 2 -8 0.58 1.12
 12 -2 -7 -0.38 1.4
 12 2 -7 -0.22 1.74
 12 -2 -6 5.65 3.19
 12 2 -6 8.22 3.64
 -12 2 5 0.76 1.04
 -12 2 5 -0.05 1.22
 -12 -2 5 2.65 2.78
 12 -2 -5 3.8 2.96
 12 2 -5 0.13 0.81
 -12 2 4 1.1 1.25
 -12 2 4 0.32 1.88
 -12 -2 4 -1.08 1.9
 12 -2 -4 0.21 1.78
 12 2 -4 1.89 2.22
 -12 2 3 0.5 0.54
 -12 2 3 2.57 2.14
 -12 -2 3 2.05 1.91
 12 -2 -3 -0.6 1.11
 12 2 -3 -0.15 1.52
 -12 2 2 1.43 2.03
 -12 2 2 0.2 0.85
 -12 -2 2 1.63 2.32
 -12 2 1 -1.91 1.51
 -12 -2 1 1.06 1.66
 -12 2 0 7.71 3.27
 -12 2 0 4.5 2.2
 -12 -2 0 7.1 3.4
 -12 2 -1 0.39 0.92
 -12 2 -1 -1.3 1.58
 -12 -2 -1 0.07 1.64
 -12 2 -2 7.89 2.95
 -12 2 -3 4.98 2.56
 -12 2 -4 -0.12 1.32
 -12 -2 -4 0.93 1.42
 -12 2 -5 10.23 3.92
 -12 -2 -5 9.1 3.79
 -12 2 -6 1.07 1.5
 -12 2 -7 6.44 4.03
 -12 -2 -7 4.72 3.34
 -12 2 -7 -2.62 2.2
 -12 2 -8 -1.05 1.49
 12 -3 -9 34.14 8.44
 12 3 -9 30.53 7.68
 12 -3 -8 5.46 3.17
 12 3 -8 -3.8 2.65
 12 -3 -7 -0.8 1.3
 12 3 -7 1.58 2.22
 -12 3 7 -0.98 1.36
 12 -3 -6 -1.1 1.87
 12 3 -6 5.49 3.52
 -12 3 6 3.72 2.39
 -12 3 5 -0.14 1.18
 -12 -3 5 2.56 2.2
 12 -3 -5 1.87 2.23
 12 3 -5 -0.56 1.46
 -12 3 4 -0.63 1.18
 -12 3 4 1.31 1.28
 -12 -3 4 -3.01 2.75
 12 -3 -4 0.46 1.4
 12 3 -4 4.25 2.77
 -12 3 3 -0.59 0.91
 -12 3 3 -1.68 1.56
 -12 -3 3 -0.54 2.25
 12 -3 -3 -1.71 1.76
 12 3 -3 4.5 3.24
 -12 3 2 10.54 3.56
 -12 3 2 12.61 4.48
 -12 -3 2 12.52 4.51
 -12 3 1 1 0.73
 -12 3 1 -0.41 0.72
 -12 3 0 -0.18 1.03
 -12 3 0 1.5 1.7
 -12 -3 0 1.2 2.52
 -12 3 -1 2.08 2.17
 -12 3 -1 0.43 1.28
 -12 -3 -1 -0.77 1.59
 -12 3 -2 2.64 2.18
 -12 3 -3 2.1 0.67
 -12 3 -4 4.91 2.2
 -12 3 -5 2.72 1.95
 -12 3 -6 -2.25 2.59
 -12 3 -7 0 1.28
 -12 -3 -7 1.22 2.43
 -12 3 -7 -0.11 1.04
 -12 3 -8 1.61 2.06
 12 -4 -8 1.98 2.24
 12 4 -8 5.96 3.81
 -12 4 8 1.95 1.79
 12 -4 -7 0 2.39
 12 4 -7 -2.33 2.21
 -12 4 7 0.8 0.81
 12 -4 -6 16.03 5.34
 12 4 -6 13.79 4.51
 -12 4 6 12.34 4.28
 -12 4 5 1.71 1.69
 12 -4 -5 0.16 1.27
 -12 4 4 11.23 3.86
 -12 4 4 11.05 3.76
 -12 -4 4 14.77 4.67
 12 -4 -4 10.85 4.25
 12 4 -4 18.07 4.95
 -12 4 3 9.77 3.51
 -12 4 3 12.68 4.15
 -12 -4 3 12.73 4.57
 -12 4 2 23.87 5.34
 -12 4 2 36.52 7.2
 -12 -4 2 34.81 7.73
 -12 4 1 0.32 1.74
 -12 4 1 -1.12 1.65
 -12 -4 1 1.27 1.8
 -12 4 0 7.4 3.19
 -12 4 0 7.35 3.35
 -12 -4 0 6.97 3.18
 -12 4 -1 -0.01 1.04
 -12 4 -1 -0.52 0.99
 -12 4 -2 2.18 0.93
 -12 4 -2 4.5 2.63
 -12 -4 -2 5.39 3.15
 -12 4 -3 1.71 1.06
 -12 4 -4 -4.61 2.87
 -12 4 -5 0.49 1.21
 -12 4 -6 3.57 2.34
 -12 4 -7 1.08 1.67
 12 -5 -8 4.11 3.12
 -12 5 8 1.34 1.65
 12 -5 -7 0 0.87
 12 5 -7 9.04 4.01
 -12 5 7 5.2 3.02
 12 -5 -6 3.45 2.46
 12 5 -6 8.4 3.74
 -12 5 6 2.06 1.63
 -12 5 5 3.86 2.68
 12 -5 -5 1.45 2.19
 12 5 -5 -1.68 1.43
 -12 5 4 -0.72 0.97
 -12 5 4 0.59 1.71
 -12 -5 4 0.77 1.2
 12 -5 -4 -3.2 2.38
 12 5 -4 -0.02 1.53
 -12 5 3 8.38 2.7
 -12 5 3 16.25 4.8
 -12 -5 3 17.23 5.24
 -12 5 2 -0.25 0.96
 -12 5 2 -0.1 0.98
 -12 -5 2 -2.82 2.31
 -12 5 1 0.62 1.31
 -12 5 1 4.95 2.78
 -12 -5 1 3.56 2.23
 -12 5 0 0.94 1.69
 -12 5 0 3.74 2.26
 -12 -5 0 3.62 2.39
 -12 5 -1 -1.13 1.71
 -12 5 -1 1.03 1.17
 -12 -5 -1 0.59 1.08
 -12 5 -2 -3.24 2.1
 -12 5 -2 -1.33 1.47
 -12 -5 -2 0.24 1.54
 -12 5 -3 1.98 1.64
 -12 5 -4 1.71 1.15
 -12 5 -5 1.51 1.07
 -12 5 -6 2.43 1.36
 -12 5 -7 0.04 1.2
 12 -6 -8 2.77 3.37
 12 6 -8 1.47 2.07
 -12 6 8 0.89 1.2
 12 -6 -7 6.65 3.79
 -12 6 7 6.59 3.6
 -12 6 6 2.02 1.8
 12 -6 -6 3.01 3.06
 12 6 -6 9.44 3.95
 -12 6 5 1.83 1.88
 12 -6 -5 3.75 2.55
 12 6 -5 -1.32 1.61
 -12 6 4 13.75 4.46
 -12 6 4 4 2.72
 -12 -6 4 25.12 6.69
 12 -6 -4 5.58 3.32
 12 6 -4 23.66 5.82
 -12 6 3 17.23 4.88
 -12 6 3 3.25 2.19
 -12 -6 3 18.83 5.81
 -12 6 2 2.43 1.64
 -12 6 2 -0.8 1.63
 -12 -6 2 3.04 2.24
 -12 6 1 0.5 1.84
 -12 6 1 -4.15 2.9
 -12 -6 1 2.56 2.92
 -12 6 0 35.53 6.79
 -12 6 0 16.68 4.76
 -12 -6 0 35.27 7.86
 -12 6 -1 -0.14 1.7
 -12 6 -1 -3.26 2.56
 -12 -6 -1 -0.15 0.84
 -12 6 -2 4.62 2.99
 -12 6 -2 -0.72 2.07
 -12 -6 -2 1.49 2.64
 -12 6 -3 -1.44 1.48
 -12 6 -4 3.92 2.33
 -12 6 -5 -5.28 2.96
 -12 6 -6 0.05 0.8
 12 -7 -8 2.83 2.34
 12 7 -8 -2.46 2.1
 -12 7 8 1.54 2.45
 12 -7 -7 1.99 2.9
 12 7 -7 3.04 2.56
 -12 7 7 3.32 2.92
 -12 7 6 -1.22 1.51
 12 -7 -6 1.4 2.96
 12 7 -6 1.3 2.37
 -12 7 5 6.95 3.61
 12 -7 -5 3.93 2.64
 12 7 -5 1.66 1.97
 -12 7 4 5.23 2.55
 -12 -7 4 10.77 4.79
 -12 7 3 -0.41 0.85
 -12 7 3 0.89 0.95
 -12 7 2 2.81 2.34
 -12 7 2 2 1.58
 -12 -7 2 2.79 2.86
 -12 7 1 3.31 2.18
 -12 7 1 1.73 1.61
 -12 -7 1 5.7 3.55
 -12 7 0 1.45 1.68
 -12 7 0 0.83 0.72
 -12 -7 0 1.39 1.96
 -12 7 -1 1.65 1.49
 -12 7 -1 -0.74 1.3
 -12 -7 -1 1.95 2.75
 -12 7 -2 -0.22 0.99
 -12 -7 -2 3.16 2.29
 -12 7 -3 1.85 1.51
 -12 7 -3 -0.71 1.1
 -12 -7 -3 3.27 2.68
 -12 7 -4 3.26 2.12
 -12 7 -5 8.36 3.91
 12 -8 -8 0 1.66
 12 8 -8 -1.11 1.49
 12 -8 -7 3.37 3.59
 12 8 -7 9.33 4.5
 -12 8 7 6.64 3.99
 -12 8 6 1.2 1.82
 12 -8 -6 2.86 3.24
 12 8 -6 2.01 2.19
 -12 8 5 1.49 1.59
 12 -8 -5 0 1.66
 12 8 -5 1.72 1.71
 -12 8 4 1.59 1.96
 -12 8 3 0.74 1.76
 -12 8 3 1.8 1.44
 -12 -8 3 -2.19 2.21
 -12 8 2 -2.44 1.96
 -12 8 2 2.09 1.9
 -12 -8 2 3.35 2.96
 -12 8 1 4.42 2.79
 -12 8 1 1.36 1.37
 -12 -8 1 0.99 1.19
 -12 8 0 13.32 4.63
 -12 8 0 5.82 2.94
 -12 -8 0 8.72 3.97
 -12 8 -1 8.03 3.13
 -12 8 -1 3.76 2.37
 -12 -8 -1 12.22 4.6
 -12 8 -2 0.99 0.92
 -12 -8 -2 -0.54 1.22
 -12 8 -3 5.03 2.99
 -12 8 -3 3.68 2.55
 -12 -8 -3 0.21 1.07
 -12 8 -4 2.69 2.17
 12 -9 -7 2.26 2.08
 12 9 -7 0 2.81
 12 -9 -6 -0.79 1.26
 12 9 -6 -0.29 0.58
 -12 9 5 2.75 2.47
 -12 9 4 1.49 2.07
 -12 9 3 1.57 2.02
 -12 9 3 0.11 0.82
 -12 -9 3 1.15 1.88
 -12 9 2 4.16 2.91
 -12 9 2 -2.42 2.18
 -12 -9 2 1.31 1.92
 -12 9 1 13.53 4.66
 -12 9 1 5.1 2.64
 -12 -9 1 7.28 3.81
 -12 9 0 -0.66 1.03
 -12 -9 0 0.57 0.96
 -12 9 -1 1.63 1.55
 -12 9 -1 2.56 2.1
 -12 -9 -1 3.06 3.04
 -12 9 -2 1.51 1.24
 -12 9 -2 0.94 0.92
 -12 -9 -2 0.68 1.41
 -12 9 -3 0.65 0.61
 -12 9 -3 2.38 1.76
 -12 -9 -3 4.71 3.23
 -12 9 -4 1.72 1.64
 -12 -9 -4 -0.57 1.43
 -12 10 3 1 1.69
 -12 10 2 -1.08 1.45
 -12 10 1 0.48 1.06
 -12 10 0 -5.68 3.59
 -12 10 -1 0.61 0.86
 13 0 -7 9.7 4.31
 13 0 -6 3.07 2.9
 -13 0 5 -0.85 1.18
 13 0 -5 0.23 1.01
 -13 0 4 -2.41 2
 13 0 -4 0.14 1.08
 -13 0 3 -0.36 0.94
 -13 0 2 -2.9 2.72
 -13 0 1 0.94 0.92
 -13 0 0 0.86 1.7
 -13 0 -1 -0.51 2.15
 -13 0 -2 -5.17 3.3
 -13 0 -3 -0.86 1.6
 -13 0 -4 0.2 1.08
 -13 0 -5 16.5 4.94
 -13 0 -6 -4 2.8
 -13 0 -7 1.49 1.86
 -13 0 -8 0.14 0.74
 13 -1 -7 2.25 2.58
 13 1 -7 4.21 2.99
 13 -1 -6 13.36 5.14
 13 1 -6 11.21 4.52
 -13 1 5 -0.95 1.49
 13 -1 -5 0.95 1.19
 13 1 -5 0.33 0.98
 -13 1 4 10.07 4.13
 -13 -1 4 9.51 4.08
 13 -1 -4 7.26 3.49
 13 1 -4 11.82 4.53
 -13 1 3 2.28 2.12
 -13 -1 3 0.21 1.43
 -13 1 2 0.08 1.42
 -13 -1 2 3.42 2.78
 -13 1 1 4.85 3.21
 -13 -1 1 3.08 2.72
 -13 1 0 -0.91 1.56
 -13 1 0 -1.85 2.03
 -13 -1 0 -4.34 3.49
 -13 1 -1 2.24 2.01
 -13 1 -1 0.91 1.11
 -13 -1 -1 -2.14 2.38
 -13 1 -2 3.64 1.64
 -13 1 -2 7.24 3.25
 -13 -1 -2 6.95 3.7
 -13 1 -3 0.8 1.57
 -13 1 -4 1.35 1.75
 -13 1 -5 1.91 1.77
 -13 1 -6 2.24 2.13
 -13 -1 -6 5.24 3.11
 -13 1 -7 0.06 1.2
 -13 -1 -7 3.15 2.65
 -13 -1 -8 1.28 2.21
 13 -2 -7 24.1 6.69
 13 2 -7 19.71 6.13
 13 -2 -6 -2 2.01
 13 2 -6 3.39 3.8
 -13 2 5 0.63 1.01
 -13 -2 5 6.23 3.18
 13 -2 -5 9.53 4.09
 13 2 -5 5.34 3.7
 -13 2 4 -3.32 3.24
 -13 -2 4 3.04 2.83
 13 -2 -4 0.79 1.71
 13 2 -4 2.64 2.61
 -13 2 3 -3.11 2.6
 -13 -2 3 2.32 1.77
 -13 2 2 -1.29 1.84
 -13 2 2 -1.47 1.07
 -13 -2 2 -1.73 1.92
 -13 2 1 0.06 0.74
 -13 2 1 0.09 0.88
 -13 -2 1 -1.22 2.23
 -13 2 0 1.72 2.04
 -13 2 0 -2.72 2.54
 -13 -2 0 4.98 3.01
 -13 2 -1 2.72 1.98
 -13 2 -1 2.91 2.43
 -13 -2 -1 4.02 2.7
 -13 2 -2 -2.18 2.02
 -13 2 -2 1.32 1.76
 -13 -2 -2 -2.64 2.55
 -13 2 -3 4.34 2.59
 -13 2 -4 -1.89 2.47
 -13 2 -5 1.23 1.46
 -13 2 -6 -0.01 0.86
 -13 2 -7 0 0.92
 13 -3 -7 -1.85 1.97
 13 3 -7 -1.57 1.92
 13 -3 -6 11.34 4.8
 13 3 -6 9.06 3.99
 13 -3 -5 3.35 2.8
 13 3 -5 2.1 1.67
 -13 3 4 1.01 1.08
 -13 3 4 -3.98 2.83
 -13 -3 4 -0.25 1.63
 13 -3 -4 0.32 1.98
 13 3 -4 4.25 3.11
 -13 3 3 -2.63 2.19
 -13 3 3 0 1.38
 -13 -3 3 -2.1 2.3
 -13 3 2 1.02 1.09
 -13 3 2 0.71 1.4
 -13 -3 2 3.39 2.13
 -13 3 1 0.55 1.3
 -13 3 1 0.05 1.31
 -13 -3 1 -2.65 2.17
 -13 3 0 7.85 3.27
 -13 3 0 6.46 2.77
 -13 -3 0 12.91 4.89
 -13 3 -1 -0.71 1.1
 -13 3 -1 -0.36 1.65
 -13 -3 -1 2.3 0.8
 -13 3 -2 -1.18 1.76
 -13 3 -2 -1.41 2.04
 -13 -3 -2 -0.3 0.86
 -13 3 -3 1.24 1.69
 -13 3 -4 -1.02 1.35
 -13 3 -5 4.42 2.91
 -13 3 -6 -2.03 2.15
 -13 3 -7 -0.98 1.47
 13 -4 -7 -0.6 1.25
 13 4 -7 -3.91 2.73
 13 -4 -6 0 1.63
 13 4 -6 2.22 2.5
 -13 4 6 1.2 1.65
 -13 4 5 -0.46 1.11
 13 -4 -5 -1.12 1.59
 13 4 -5 0.06 1.12
 -13 4 4 11.19 3.91
 -13 4 4 15.35 4.92
 -13 -4 4 16.18 5.08
 13 -4 -4 11.02 4.67
 -13 4 3 -1.01 1.57
 -13 4 3 -1.08 2.88
 -13 -4 3 3.3 2.42
 -13 4 2 6.06 3.1
 -13 4 2 14.04 4.73
 -13 -4 2 16.58 5.23
 -13 4 1 7.27 3.09
 -13 4 1 13.81 4.35
 -13 -4 1 16.3 5.36
 -13 4 0 1.12 1.13
 -13 4 0 1.07 1.68
 -13 -4 0 0.21 0.7
 -13 4 -1 11.19 4.07
 -13 4 -1 19.4 5.37
 -13 -4 -1 17.77 5.53
 -13 4 -2 -1.34 1.66
 -13 -4 -2 0.5 2.02
 -13 4 -3 -2.69 2.05
 -13 4 -4 7.24 3.65
 -13 4 -5 -0.91 1.34
 -13 4 -6 1.52 1.72
 -13 5 7 -2.04 1.91
 13 -5 -6 0 1.02
 13 5 -6 2.73 2.27
 -13 5 6 -1.89 2.21
 -13 5 5 -0.43 1.13
 13 -5 -5 0.33 1.01
 13 5 -5 -3.25 2.82
 -13 5 4 0.75 1.41
 -13 5 4 3.57 2.51
 -13 -5 4 2.28 2.18
 -13 5 3 0.24 1.12
 -13 5 3 2.78 1.89
 -13 -5 3 2.92 2.62
 -13 5 2 7.31 2.86
 -13 5 2 6.64 3.04
 -13 5 1 -1.13 1.59
 -13 5 1 -1.52 1.46
 -13 -5 1 2.73 3.02
 -13 5 0 5.65 3.13
 -13 5 0 6.52 3.26
 -13 -5 0 10.46 4.7
 -13 5 -1 2.09 2.44
 -13 5 -1 -0.73 1.2
 -13 -5 -1 3.74 2.92
 -13 5 -2 0.03 1.18
 -13 5 -2 1.28 1.4
 -13 5 -3 -0.26 0.78
 -13 -5 -3 0.33 0.8
 -13 5 -4 -0.41 1.76
 -13 5 -5 -1.81 1.83
 -13 6 8 -0.75 1.71
 -13 6 7 1.69 1.75
 13 -6 -6 1.11 3.31
 13 6 -6 3.37 2.5
 -13 6 6 0.92 1.5
 -13 6 5 -0.64 1.18
 13 -6 -5 2.26 3.21
 13 6 -5 -1.11 1.94
 -13 6 4 0.05 0.95
 -13 6 4 -0.86 1.34
 -13 -6 4 2.54 2.39
 -13 6 3 3.24 2.43
 -13 6 3 7.75 3.67
 -13 -6 3 13.15 5.24
 -13 6 2 3.46 2.52
 -13 6 2 2.67 1.85
 -13 -6 2 3.64 3.1
 -13 6 1 -2.71 2.09
 -13 6 1 -0.58 1.1
 -13 -6 1 -1.38 1.74
 -13 6 0 4.48 3.2
 -13 6 0 3.45 2.26
 -13 -6 0 2.25 2.36
 -13 6 -1 29.8 6.95
 -13 6 -1 20.14 5.52
 -13 -6 -1 37.58 8.53
 -13 6 -2 7.61 3.92
 -13 6 -2 2.49 2.11
 -13 -6 -2 5.87 3.54
 -13 6 -3 -1.07 1.4
 -13 6 -3 -3.1 2.57
 -13 -6 -3 3.16 2.43
 -13 6 -4 4.13 2.84
 -13 6 -5 0.61 1.54
 -13 7 7 1.27 1.65
 13 -7 -6 0 0.78
 13 7 -6 3.01 2.85
 -13 7 6 -3.04 2.41
 -13 7 5 -4.65 2.88
 13 -7 -5 -3.18 2.48
 -13 7 4 0.13 0.49
 -13 -7 4 1.45 1.77
 -13 7 3 0.63 0.93
 -13 7 3 1.08 1.48
 -13 -7 3 1.17 2.36
 -13 7 2 3.02 2.56
 -13 7 2 0.47 1.47
 -13 -7 2 -1.15 1.55
 -13 7 1 -2.43 2.04
 -13 7 1 0.94 1.74
 -13 -7 1 -1.44 1.79
 -13 7 0 1.24 1.72
 -13 7 0 0.25 0.78
 -13 -7 0 1.17 2.32
 -13 7 -1 0.23 1.13
 -13 -7 -1 0 1.63
 -13 7 -2 -1.43 1.61
 -13 7 -2 0.66 1.1
 -13 -7 -2 -2.09 2.07
 -13 7 -3 4.36 3.05
 -13 7 -3 -2.04 2.08
 -13 -7 -3 3.25 2.76
 -13 7 -4 -0.57 1.29
 13 -8 -6 0 2.77
 13 8 -6 2.48 3.14
 -13 8 5 -1.55 2.16
 -13 8 4 -2.16 2.28
 -13 8 3 0.98 1.47
 -13 8 3 0.25 0.74
 -13 -8 3 1.27 2.09
 -13 8 2 1.92 2.01
 -13 8 2 -0.73 1.05
 -13 -8 2 -2.73 2.36
 -13 8 1 1.67 1.5
 -13 8 1 -0.51 1.36
 -13 8 0 1.65 1.51
 -13 8 0 0.53 1.36
 -13 -8 0 -0.8 1.37
 -13 8 -1 5.13 3.18
 -13 8 -1 3.85 2.88
 -13 -8 -1 0.46 1.58
 -13 8 -2 3.83 2.88
 -13 8 -2 1.31 1.87
 -13 -8 -2 1.12 2.35
 -13 8 -3 -1.65 2.01
 -13 -8 -3 0 0.65
 -13 8 -4 1.23 1.81
 -13 -8 -4 -3.87 2.8
 -13 9 3 0.24 1
 -13 -9 3 -3.69 2.72
 -13 9 2 0.31 1.21
 -13 -9 2 -1.48 2.55
 -13 9 1 1.24 1.53
 -13 -9 1 1.59 2.33
 -13 9 0 4.79 3.09
 -13 -9 0 5.48 3.84
 -13 9 -1 0.08 0.69
 -13 -9 -1 1.12 1.96
 -13 9 -2 -4.16 2.54
 -13 -9 -2 -4.25 2.94
 -13 9 -3 0.95 1.96
 -13 -9 -3 1.68 3.12
 -13 9 -4 0.23 1.47
 -13 -9 -4 0 1.31
 -14 0 4 1.48 1.51
 -14 0 3 -4.06 3.19
 -14 0 2 -3.96 3.27
 -14 0 1 -12.05 4.83
 -14 0 0 12.94 4.68
 -14 0 -1 -10.16 5.02
 -14 0 -2 -6.57 3.5
 -14 0 -3 -2.94 2.56
 -14 1 4 0.6 0.97
 -14 -1 4 -0.68 0.84
 -14 1 3 -0.78 2.31
 -14 -1 3 12.93 5.22
 -14 1 2 5.11 3.4
 -14 -1 2 8.01 4.35
 -14 1 1 5.74 3.36
 -14 -1 1 -0.51 1.04
 -14 1 0 -1.68 1.08
 -14 -1 0 -3.08 2.66
 -14 1 -1 3.09 2.18
 -14 -1 -1 4.76 3.18
 -14 1 -2 0.56 1.47
 -14 -1 -2 -2.44 2
 -14 1 -3 2.38 2.18
 -14 -1 -3 -0.99 2
 -14 1 -5 0.61 1.28
 -14 1 -6 -2.41 2.06
 -14 2 4 3.32 3.08
 -14 -2 4 -2.65 2.37
 -14 2 3 0.16 0.79
 -14 -2 3 0.35 1.55
 -14 2 2 -1.36 1.99
 -14 -2 2 3.03 2.57
 -14 2 1 -1.32 0.92
 -14 -2 1 2.87 2.92
 -14 2 0 0.93 1.54
 -14 -2 0 -0.04 1.13
 -14 2 -1 8.79 4.13
 -14 -2 -1 13.46 5.22
 -14 2 -2 0.59 1.12
 -14 -2 -2 -2.8 2.66
 -14 2 -3 0.78 1.35
 -14 2 -3 -0.16 1.33
 -14 -2 -3 -0.29 0.74
 -14 2 -4 6.49 3.32
 -14 2 -5 -0.05 0.59
 -14 2 -6 0.69 2.39
 -14 3 4 5.25 3.87
 -14 -3 4 1.61 2.39
 -14 3 3 4.48 2.82
 -14 -3 3 4.81 3.32
 -14 3 2 1.69 1.33
 -14 -3 2 8.57 4.13
 -14 3 1 1.91 1.82
 -14 -3 1 -0.45 1.77
 -14 3 0 1.1 1.32
 -14 -3 0 0.18 1.1
 -14 3 -1 1.54 1.99
 -14 3 -1 0.71 1.9
 -14 -3 -1 1.62 2.31
 -14 3 -2 -1.43 1.75
 -14 3 -2 0 1.05
 -14 -3 -2 -2.31 2.13
 -14 3 -3 0.49 1.17
 -14 3 -3 4.64 3.16
 -14 3 -4 -2.08 2.25
 -14 3 -5 -1.18 2.12
 -14 4 4 7.28 3.82
 -14 -4 4 0.91 1.25
 -14 4 3 14.34 5.24
 -14 -4 3 20.58 6.67
 -14 4 2 0.99 1.4
 -14 4 2 1.14 1.41
 -14 -4 2 2.42 2.65
 -14 4 1 1.65 1.56
 -14 4 1 6.35 3.48
 -14 4 0 3.42 2.6
 -14 4 0 3.35 3.54
 -14 -4 0 -0.71 1.82
 -14 4 -1 1.73 1.72
 -14 4 -1 2.06 2.13
 -14 -4 -1 -3.86 2.86
 -14 4 -2 3.3 2.42
 -14 4 -2 14.91 5.28
 -14 -4 -2 10.85 4.48
 -14 4 -3 -1.17 1.43
 -14 4 -4 1.47 2.47
 -14 5 4 0.25 1.03
 -14 5 3 1.85 1.84
 -14 5 3 1.72 2.08
 -14 -5 3 -0.28 0.89
 -14 5 2 2.89 2.24
 -14 5 2 3.64 3.16
 -14 -5 2 0.58 1.89
 -14 5 1 -2.36 2.38
 -14 5 1 -2.52 2.18
 -14 -5 1 1.89 2.72
 -14 5 0 0.94 1.47
 -14 5 0 0.53 1.32
 -14 -5 0 2.94 2.81
 -14 5 -1 0.62 1.06
 -14 5 -1 0.17 0.79
 -14 -5 -1 -2.35 2.29
 -14 5 -2 3.06 2.45
 -14 5 -2 7.52 3.92
 -14 -5 -2 7.3 4.14
 -14 5 -3 0.24 1.19
 -14 6 6 1.42 2.25
 -14 6 5 2.18 2.69
 -14 6 4 11.99 5.02
 -14 6 3 1.1 1.77
 -14 6 3 3.31 3.01
 -14 -6 3 0.1 1.07
 -14 6 2 0.5 1.41
 -14 6 2 3.11 2.71
 -14 -6 2 2.44 2.64
 -14 6 1 1.4 1.7
 -14 6 1 -2.73 2.78
 -14 -6 1 -2.94 2.55
 -14 6 0 1.62 1.21
 -14 6 0 -1.76 1.64
 -14 -6 0 2.41 2.56
 -14 6 -1 -2.27 1.97
 -14 6 -1 1 1.68
 -14 -6 -1 1.69 2.23
 -14 6 -2 5.39 3.56
 -14 7 4 0.56 1.48
 -14 7 3 -1.11 1.43
 -14 7 2 0.12 1.4
 -14 7 2 0.27 1.14
 -14 -7 2 3.96 2.94
 -14 7 1 -1.57 1.59
 -14 7 1 0.43 0.84
 -14 -7 1 -0.66 1.33
 -14 7 0 3.53 2.94
 -14 7 0 4.51 3.27
 -14 -7 0 6.31 4.73
 -14 7 -1 0.21 0.86
 -14 -7 -1 0 0.81
 -15 4 -2 0.63 1.63
 -15 5 0 -2.74 2.24
 -15 5 -1 0.21 1.45

_iucr_refine_instructions_details
;
TITL exp_185_a.res in P2(1)/n
    exp_185.res
    created by SHELXL-2018/3 at 12:39:00 on 13-Oct-2022
REM Old TITL exp_185 in P2(1)/n
REM SHELXT solution in P2(1)/n: R1 0.276, Rweak 0.342, Alpha 0.028
REM <I/s> 0.502 for 157 systematic absences, Orientation as input
REM Formula found by SHELXT: C16 N O9
CELL 0.71073 10.8844 13.1919 11.3734 90 92.641 90
ZERR 4 0.0008 0.0009 0.0009 0 0.007 0
LATT 1
SYMM 0.5-X,0.5+Y,0.5-Z
SFAC C H F N O
UNIT 52 60 24 4 24

L.S. 7
PLAN  5
SIZE 0.45 0.29 0.13
TEMP 22(2)
CONF
BOND
list 4
fmap 2 53
MORE -1
BOND $H
ACTA
OMIT -12 9 6
REM <olex2.extras>
REM <HklSrc "%.\\exp_185.hkl">
REM </olex2.extras>

WGHT    0.095000
EXTI    0.008280
FVAR       0.48898
O6    5    0.693272    0.386626    0.451322    11.00000    0.04915    0.05153 =
         0.04411   -0.00467    0.00857   -0.00045
O3    5    0.741166    0.324211    0.709188    11.00000    0.04943    0.04508 =
         0.04930   -0.00096    0.00986    0.00542
F5    3    0.721247    0.692228    0.559098    11.00000    0.10528    0.04491 =
         0.07334    0.00175    0.00470   -0.00172
O2    5    0.547240    0.390198    1.022402    11.00000    0.05278    0.06067 =
         0.04775    0.00551    0.01889   -0.00473
O4    5    0.881563    0.548805    0.635584    11.00000    0.03978    0.07287 =
         0.04476   -0.00144    0.00971   -0.01265
F6    3    0.614508    0.590717    0.449386    11.00000    0.07420    0.07163 =
         0.07805    0.01947   -0.02175   -0.00252
F4    3    0.802282    0.621621    0.411765    11.00000    0.10514    0.08598 =
         0.05996    0.02476    0.03007   -0.00655
O1    5    0.696145    0.589062    0.940433    11.00000    0.04958    0.05012 =
         0.06917   -0.00100    0.01775   -0.00390
F3    3    0.823197    0.379378    1.103381    11.00000    0.10496    0.09732 =
         0.05157    0.01221   -0.01011    0.01265
F2    3    0.726236    0.509486    1.165239    11.00000    0.09343    0.12290 =
         0.04814   -0.02345    0.01761   -0.01474
F1    3    0.898902    0.528835    1.083791    11.00000    0.06664    0.12907 =
         0.06723   -0.01274   -0.00983   -0.02559
O5    5    0.898762    0.401296    0.476390    11.00000    0.04388    0.07317 =
         0.07853   -0.00846    0.02274   -0.00173
N1    4    0.603509    0.391309    0.830155    11.00000    0.03691    0.04524 =
         0.04295    0.00195    0.00854   -0.00428
C5    1    0.710625    0.417383    0.762458    11.00000    0.03365    0.04015 =
         0.04358    0.00051    0.00877    0.00066
C8    1    0.674968    0.497415    0.669564    11.00000    0.03393    0.04610 =
         0.04051    0.00256    0.00450    0.00031
AFIX  23
H8A   2    0.658398    0.560597    0.709482    11.00000   -1.20000
H8B   2    0.599174    0.476234    0.628538    11.00000   -1.20000
AFIX   0
C2    1    0.615024    0.416520    0.945119    11.00000    0.04066    0.04590 =
         0.04281    0.00510    0.01064    0.00338
C9    1    0.771532    0.517614    0.577832    11.00000    0.03751    0.04760 =
         0.03859    0.00378    0.00415   -0.00671
C4    1    0.806256    0.450325    0.857950    11.00000    0.03588    0.05666 =
         0.03798    0.00295    0.00580    0.00139
AFIX  23
H4A   2    0.858629    0.394050    0.882765    11.00000   -1.20000
H4B   2    0.857105    0.504969    0.830301    11.00000   -1.20000
AFIX   0
C11   1    0.795525    0.426739    0.496841    11.00000    0.04381    0.05272 =
         0.04272    0.00406    0.01326   -0.00300
C6    1    0.539788    0.302608    0.780698    11.00000    0.04883    0.04945 =
         0.04957    0.00382    0.00088   -0.00914
AFIX  23
H6A   2    0.460395    0.320650    0.744407    11.00000   -1.20000
H6B   2    0.528580    0.251126    0.840148    11.00000   -1.20000
AFIX   0
C3    1    0.727837    0.485864    0.957787    11.00000    0.04273    0.04659 =
         0.04526    0.00024    0.00828   -0.00207
C10   1    0.726424    0.605728    0.498809    11.00000    0.06130    0.05430 =
         0.04642    0.00632    0.00685   -0.00414
C7    1    0.628691    0.267288    0.689255    11.00000    0.06472    0.04751 =
         0.05605   -0.00110    0.01005   -0.00941
AFIX  23
H7A   2    0.644631    0.195258    0.697800    11.00000   -1.20000
H7B   2    0.594109    0.279717    0.610444    11.00000   -1.20000
AFIX   0
C12   1    0.706921    0.301114    0.371837    11.00000    0.07420    0.05314 =
         0.04763   -0.00762    0.01518    0.00145
AFIX  23
H12A  2    0.736450    0.242069    0.415409    11.00000   -1.20000
H12B  2    0.765579    0.317409    0.313006    11.00000   -1.20000
AFIX   0
C1    1    0.793911    0.475661    1.078411    11.00000    0.05783    0.08126 =
         0.04648   -0.00670    0.00690   -0.00605
C13   1    0.582868    0.279990    0.313867    11.00000    0.08137    0.08676 =
         0.06664   -0.02766    0.00392   -0.00851
AFIX 137
H13A  2    0.588584    0.223028    0.261873    11.00000   -1.50000
H13B  2    0.555364    0.338389    0.269701    11.00000   -1.50000
H13C  2    0.525323    0.265043    0.372955    11.00000   -1.50000
AFIX   0
H4    2    0.942955    0.540696    0.589458    11.00000    0.09002
H1    2    0.618372    0.596938    0.966518    11.00000    0.06733
HKLF 4


REM  exp_185_a.res in P2(1)/n
REM wR2 = 0.2039, GooF = S = 1.003, Restrained GooF = 1.003 for all data
REM R1 = 0.0544 for 2282 Fo > 4sig(Fo) and 0.1148 for all 4404 data
REM 245 parameters refined using 0 restraints

END  
     
WGHT      0.0579      0.2842 

REM Highest difference peak  0.221,  deepest hole -0.214,  1-sigma level  0.050
Q1    1   0.7239  0.5539  0.9550  11.00000  0.05    0.22
Q2    1   0.6604  0.6599  0.5250  11.00000  0.05    0.19
Q3    1   0.6993  0.3840  0.7613  11.00000  0.05    0.19
Q4    1   0.5780  0.4844  0.8620  11.00000  0.05    0.18
Q5    1   0.7629  0.4878  0.5559  11.00000  0.05    0.18

  REM The information below was added by Olex2.
  REM
  REM R1 = 0.0544 for 2282 Fo > 4sig(Fo) and 0.1148 for all 11549 data
  REM 245 parameters refined using n/a restraints
  REM Highest difference peak 0.22, deepest hole -0.21
  REM Mean Shift 0, Max Shift 0.000.

  REM +++ Tabular Listing of Refinement Information +++
  REM R1_all = 0.1148
  REM R1_gt = 0.0544
  REM wR_ref = 0.2039
  REM GOOF = 1.003
  REM Shift_max = 0.000
  REM Shift_mean = 0
  REM Reflections_all = 11549
  REM Reflections_gt = 2282
  REM Parameters = 245
  REM Hole = -0.21
  REM Peak = 0.22
  REM Flack = n/a

  
;
_olex2_submission_special_instructions  'No special instructions were received'
_oxdiff_exptl_absorpt_empirical_details
;
Empirical correction (ABSPACK) includes:
- Absorption correction using spherical harmonics
- Frame scaling
;
