# Supplementary material for: Multicomponent Domino Cyclization of Ethyl Trifluoropyruvate with Methyl Ketones and Amino Alcohols as A New Way to γ-Lactam Annulated Oxazacycles
Source: Molecules. 2023 Feb 20;28(4):1983. doi: 10.3390/molecules28041983 (PMC9967980; doi:10.3390/molecules28041983)
Supplement: Supplementary file 1 [file molecules-28-01983-s001.zip › Supporting informations/8cc.cif]

data_xcalibur
_audit_creation_date           2021-05-25
_audit_creation_method         'CrysAlisPro 1.171.39.38a (Rigaku OD, 2017)'
_computing_data_collection     'CrysAlisPro 1.171.39.38a (Rigaku OD, 2017)'
_computing_cell_refinement     'CrysAlisPro 1.171.39.38a (Rigaku OD, 2017)'
_computing_data_reduction      'CrysAlisPro 1.171.39.38a (Rigaku OD, 2017)'
_cell_length_a                  10.6332(12) 
_cell_length_b                  13.8923(13) 
_cell_length_c                  9.5664(15) 
_cell_angle_alpha               90.0 
_cell_angle_beta                102.235(13) 
_cell_angle_gamma               90.0 
_cell_volume                    1381.0(3) 
_cell_measurement_reflns_used   1357
_cell_measurement_theta_min     3.9340
_cell_measurement_theta_max     21.9210
_cell_oxdiff_length_a                  10.6298(10) 
_cell_oxdiff_length_b                  13.8979(14) 
_cell_oxdiff_length_c                  9.5638(9) 
_cell_oxdiff_angle_alpha               89.999(8) 
_cell_oxdiff_angle_beta                102.187(8) 
_cell_oxdiff_angle_gamma               89.981(8) 
_cell_oxdiff_volume                    1381.0(2) 
_cell_oxdiff_measurement_reflns_used   1357
_exptl_absorpt_correction_T_min                   0.76698
_exptl_absorpt_correction_T_max                   1.00000
_exptl_absorpt_correction_type            multi-scan
_exptl_absorpt_process_details
;
CrysAlisPro 1.171.39.38a (Rigaku Oxford Diffraction, 2017)
Empirical absorption correction using spherical harmonics,
 implemented in SCALE3 ABSPACK scaling algorithm.
;
_oxdiff_exptl_absorpt_empirical_full_min           0.821
_oxdiff_exptl_absorpt_empirical_full_max           1.234
_oxdiff_exptl_absorpt_empirical_details
;
Empirical correction (ABSPACK) includes:
- Absorption correction using spherical harmonics
- Frame scaling
;
_diffrn_source 'fine-focus sealed X-ray tube'
_diffrn_source_type 'Enhance (Mo) X-ray Source'
_diffrn_radiation_probe x-ray
_diffrn_radiation_type 'Mo K\a'
_diffrn_radiation_wavelength 0.71073
_diffrn_radiation_monochromator graphite
_diffrn_measurement_device 'four-circle diffractometer'
_diffrn_measurement_device_type 'Xcalibur, Sapphire3'
_diffrn_detector 'CCD plate'
_diffrn_detector_type Sapphire3
_diffrn_detector_area_resol_mean 16.5253
_diffrn_reflns_number 10841
_diffrn_reflns_av_R_equivalents 0.0571
_diffrn_reflns_av_sigmaI/netI 0.0802
_diffrn_reflns_limit_h_min -14
_diffrn_reflns_limit_h_max 14
_diffrn_reflns_limit_k_min -19
_diffrn_reflns_limit_k_max 18
_diffrn_reflns_limit_l_min -12
_diffrn_reflns_limit_l_max 11
_diffrn_reflns_theta_min 3.5280
_diffrn_reflns_theta_max 30.8616
_diffrn_measured_fraction_theta_max 0.8686
_diffrn_reflns_theta_full 28.2205
_diffrn_measured_fraction_theta_full 0.9891
_diffrn_orient_matrix_type 'CrysAlisPro convention (1999,Acta A55,543-557)'
_diffrn_orient_matrix_UB_11      -0.0214303000
_diffrn_orient_matrix_UB_12       0.0319170000
_diffrn_orient_matrix_UB_13      -0.0580188000
_diffrn_orient_matrix_UB_21       0.0631095000
_diffrn_orient_matrix_UB_22       0.0015058000
_diffrn_orient_matrix_UB_23      -0.0133818000
_diffrn_orient_matrix_UB_31      -0.0147694000
_diffrn_orient_matrix_UB_32      -0.0397966000
_diffrn_orient_matrix_UB_33      -0.0470291000
_diffrn_measurement_details
;
List of Runs (angles in degrees, time in seconds):

  # Type    Start    End  Width  t~exp~   \w     \q     \k     \f   Frames
--------------------------------------------------------------------------
  1  \w     57.00  83.00   1.00   30.00    --   22.52  52.00  75.00   26
  2  \w    -47.00 -21.00   1.00   30.00    --   22.52 -52.00 -70.00   26
  3  \w    -45.00  46.00   1.00   30.00    --  -24.08  52.00  75.00   91
  4  \w    -86.00 -11.00   1.00   30.00    --  -24.08 -52.00 -70.00   75
  5  \w      1.00  91.00   1.00   30.00    --   22.52  57.00 150.00   90
  6  \w     35.00  86.00   1.00   30.00    --   22.52 178.00 -60.00   51
;
_diffrn_measurement_method '\w scans'
_space_group_IT_number 14
_space_group_crystal_system monoclinic
_space_group_name_H-M_alt 'P 1 21/c 1'
_reflns_odcompleteness_completeness		98.91
_reflns_odcompleteness_theta		28.22
_reflns_odcompleteness_iscentric		1
