# Supplementary material for: Multicomponent Domino Cyclization of Ethyl Trifluoropyruvate with Methyl Ketones and Amino Alcohols as A New Way to γ-Lactam Annulated Oxazacycles
Source: Molecules. 2023 Feb 20;28(4):1983. doi: 10.3390/molecules28041983 (PMC9967980; doi:10.3390/molecules28041983)
Supplement: Supplementary file 1 [file molecules-28-01983-s001.zip › Supporting informations/11b.cif]

data_dc
_audit_creation_date               2023-01-24
_audit_creation_method
;
Olex2 1.3
(compiled 2020.11.12 svn.r5f609507 for OlexSys, GUI svn.r6408)
;
_shelx_SHELXL_version_number       '2018/3'
_audit_contact_author_address      ?
_audit_contact_author_email        ?
_audit_contact_author_name         ''
_audit_contact_author_phone        ?
_publ_contact_author_id_orcid      ?
_publ_section_references
;
Dolomanov, O.V., Bourhis, L.J., Gildea, R.J, Howard, J.A.K. & Puschmann, H.
 (2009), J. Appl. Cryst. 42, 339-341.

Sheldrick, G.M. (2015). Acta Cryst. A71, 3-8.

Sheldrick, G.M. (2015). Acta Cryst. C71, 3-8.
;
_chemical_name_common              ?
_chemical_name_systematic          ?
_chemical_formula_moiety           'C15 H19 F6 N O6'
_chemical_formula_sum              'C15 H19 F6 N O6'
_chemical_formula_weight           423.31
_chemical_melting_point            ?
loop_
  _atom_type_symbol
  _atom_type_description
  _atom_type_scat_dispersion_real
  _atom_type_scat_dispersion_imag
  _atom_type_scat_source
 'C' 'C' 0.0033 0.0016 'International Tables Vol C Tables 4.2.6.8 and 6.1.1.4'
 'H' 'H' 0.0000 0.0000 'International Tables Vol C Tables 4.2.6.8 and 6.1.1.4'
 'N' 'N' 0.0061 0.0033 'International Tables Vol C Tables 4.2.6.8 and 6.1.1.4'
 'O' 'O' 0.0106 0.0060 'International Tables Vol C Tables 4.2.6.8 and 6.1.1.4'
 'F' 'F' 0.0171 0.0103 'International Tables Vol C Tables 4.2.6.8 and 6.1.1.4'

_shelx_space_group_comment
;
The symmetry employed for this shelxl refinement is uniquely defined
by the following loop, which should always be used as a source of
symmetry information in preference to the above space-group names.
They are only intended as comments.
;
_space_group_crystal_system        'monoclinic'
_space_group_IT_number             14
_space_group_name_H-M_alt          'P 1 21/c 1'
_space_group_name_Hall             '-P 2ybc'
loop_
  _space_group_symop_operation_xyz
 'x, y, z'
 '-x, y+1/2, -z+1/2'
 '-x, -y, -z'
 'x, -y-1/2, z-1/2'

_cell_length_a                     19.1431(10)
_cell_length_b                     6.4882(4)
_cell_length_c                     16.4430(9)
_cell_angle_alpha                  90
_cell_angle_beta                   107.551(6)
_cell_angle_gamma                  90
_cell_volume                       1947.2(2)
_cell_formula_units_Z              4
_cell_measurement_reflns_used      4136
_cell_measurement_temperature      295(2)
_cell_measurement_theta_max        17.8670
_cell_measurement_theta_min        2.4870
_shelx_estimated_absorpt_T_max     0.999
_shelx_estimated_absorpt_T_min     0.969
_exptl_absorpt_coefficient_mu      0.145
_exptl_absorpt_correction_T_max    1.00000
_exptl_absorpt_correction_T_min    0.42406
_exptl_absorpt_correction_type     multi-scan
_exptl_absorpt_process_details
;
CrysAlisPro 1.171.41.120a (Rigaku Oxford Diffraction, 2021)
Empirical absorption correction using spherical harmonics,
implemented in SCALE3 ABSPACK scaling algorithm.
;
_exptl_absorpt_special_details     ?
_exptl_crystal_colour              colourless
_exptl_crystal_colour_primary      colourless
_exptl_crystal_density_diffrn      1.444
_exptl_crystal_density_meas        ?
_exptl_crystal_density_method      ?
_exptl_crystal_description         plate
_exptl_crystal_F_000               872
loop_
  _exptl_crystal_face_index_h
  _exptl_crystal_face_index_k
  _exptl_crystal_face_index_l
  _exptl_crystal_face_perp_dist
 -24.82 1.31 -2.11 0.0207
 24.11 -1.40 3.58 0.0153
 26.31 -0.96 -2.20 0.0037
 26.33 -0.99 -2.36 0.0037
 -23.24 4.57 6.88 0.0041
 18.95 4.82 6.17 0.0026
 -26.25 1.14 2.19 0.0037
 -25.96 -0.53 0.43 0.0094

_exptl_crystal_size_max            0.22
_exptl_crystal_size_mid            0.08
_exptl_crystal_size_min            0.01
_exptl_transmission_factor_max     ?
_exptl_transmission_factor_min     ?
_diffrn_reflns_av_R_equivalents    0.1526
_diffrn_reflns_av_unetI/netI       0.0998
_diffrn_reflns_Laue_measured_fraction_full  0.999
_diffrn_reflns_Laue_measured_fraction_max  0.999
_diffrn_reflns_limit_h_max         23
_diffrn_reflns_limit_h_min         -23
_diffrn_reflns_limit_k_max         8
_diffrn_reflns_limit_k_min         -8
_diffrn_reflns_limit_l_max         20
_diffrn_reflns_limit_l_min         -20
_diffrn_reflns_number              15118
_diffrn_reflns_point_group_measured_fraction_full  0.999
_diffrn_reflns_point_group_measured_fraction_max  0.999
_diffrn_reflns_theta_full          25.242
_diffrn_reflns_theta_max           26.371
_diffrn_reflns_theta_min           2.500
_diffrn_ambient_temperature        295(2)
_diffrn_detector                   'Hybrid Pixel Array Detector'
_diffrn_detector_area_resol_mean   10.0000
_diffrn_detector_type              HyPix
_diffrn_measured_fraction_theta_full  0.999
_diffrn_measured_fraction_theta_max  0.999
_diffrn_measurement_device_type    'XtaLAB Synergy, Dualflex, HyPix'
_diffrn_measurement_method         'phi and omega scans'
_diffrn_radiation_monochromator    graphite
_diffrn_radiation_type             MoK\a
_diffrn_radiation_wavelength       0.71073
_diffrn_source                     'micro-focus sealed X-ray tube'
_diffrn_source_type                'PhotonJet (Mo) X-ray Source'
_reflns_Friedel_coverage           0.000
_reflns_Friedel_fraction_full      .
_reflns_Friedel_fraction_max       .
_reflns_number_gt                  1265
_reflns_number_total               3972
_reflns_special_details
;
 Reflections were merged by SHELXL according to the crystal
 class for the calculation of statistics and refinement.
 
 _reflns_Friedel_fraction is defined as the number of unique
 Friedel pairs measured divided by the number that would be
 possible theoretically, ignoring centric projections and
 systematic absences.
;
_reflns_threshold_expression       'I > 2\s(I)'
_computing_cell_refinement         ?
_computing_data_collection         ?
_computing_data_reduction          ?
_computing_molecular_graphics      'Olex2 1.3 (Dolomanov et al., 2009)'
_computing_publication_material    'Olex2 1.3 (Dolomanov et al., 2009)'
_computing_structure_refinement    'SHELXL 2018/3 (Sheldrick, 2015)'
_computing_structure_solution      'SHELXT 2018/2 (Sheldrick, 2018)'
_refine_diff_density_max           0.268
_refine_diff_density_min           -0.279
_refine_diff_density_rms           0.045
_refine_ls_extinction_coef         0.0043(18)
_refine_ls_extinction_expression  
 'Fc^*^=kFc[1+0.001xFc^2^\l^3^/sin(2\q)]^-1/4^'
_refine_ls_extinction_method       'SHELXL-2018/3 (Sheldrick 2018)'
_refine_ls_goodness_of_fit_ref     1.015
_refine_ls_hydrogen_treatment      mixed
_refine_ls_matrix_type             full
_refine_ls_number_parameters       270
_refine_ls_number_reflns           3972
_refine_ls_number_restraints       12
_refine_ls_R_factor_all            0.2070
_refine_ls_R_factor_gt             0.0601
_refine_ls_restrained_S_all        1.017
_refine_ls_shift/su_max            0.000
_refine_ls_shift/su_mean           0.000
_refine_ls_structure_factor_coef   Fsqd
_refine_ls_weighting_details      
 'w=1/[\s^2^(Fo^2^)+(0.1000P)^2^+0.1000P] where P=(Fo^2^+2Fc^2^)/3'
_refine_ls_weighting_scheme        calc
_refine_ls_wR_factor_gt            0.1547
_refine_ls_wR_factor_ref           0.2534
_refine_special_details            ?
_olex2_refinement_description
;
1. Fixed Uiso
 At 1.2 times of:
  All C(H,H) groups
 At 1.5 times of:
  All C(H,H,H) groups, All C(H,H,H,H,H,H) groups
2. Uiso/Uaniso restraints and constraints
Uanis(C11) \\sim Ueq, Uanis(C11A) \\sim Ueq: with sigma of 0.01 and sigma for
terminal atoms of 0.02
Uanis(C11) = Uanis(C11A)
3. Others
 Fixed Sof: C11(0.5) H11A(0.5) H11B(0.5) H12A(0.5) H12B(0.5) H12C(0.5)
 H12D(0.5) H12E(0.5) H12F(0.5) C11A(0.5) H11C(0.5) H11D(0.5)
4.a Secondary CH2 refined with riding coordinates:
 C13(H13A,H13B), C7(H7A,H7B), C14(H14A,H14B), C15(H15A,H15B), C11(H11A,H11B),
 C11A(H11C,H11D)
4.b Me refined with riding coordinates:
 C12(H12A,H12B,H12C), C12(H12D,H12E,H12F)
4.c Idealised Me refined as rotating group:
 C6(H6A,H6B,H6C)
;
_atom_sites_solution_hydrogens     mixed
_atom_sites_solution_primary       dual
_atom_sites_solution_secondary     ?
loop_
  _atom_site_label
  _atom_site_type_symbol
  _atom_site_fract_x
  _atom_site_fract_y
  _atom_site_fract_z
  _atom_site_U_iso_or_equiv
  _atom_site_adp_type
  _atom_site_occupancy
  _atom_site_site_symmetry_order
  _atom_site_calc_flag
  _atom_site_refinement_flags_posn
  _atom_site_refinement_flags_adp
  _atom_site_refinement_flags_occupancy
  _atom_site_disorder_assembly
  _atom_site_disorder_group
 O2 O 0.02710(18) 0.5823(6) 0.4132(2) 0.0876(12) Uani 1 1 d . . . . .
 O3 O 0.2583(2) 0.7439(8) 0.3200(2) 0.0844(12) Uani 1 1 d . . . . .
 O1 O 0.1144(2) 0.4498(6) 0.5907(2) 0.0864(13) Uani 1 1 d . . . . .
 N1 N 0.1414(2) 0.5366(6) 0.3996(2) 0.0637(11) Uani 1 1 d . . . . .
 O6 O 0.1851(2) 0.1122(6) 0.2723(2) 0.0912(12) Uani 1 1 d . . . . .
 F1 F 0.1452(2) 0.9453(6) 0.5143(2) 0.1288(14) Uani 1 1 d . . . . .
 F5 F 0.3569(2) 0.4752(7) 0.2989(3) 0.1323(14) Uani 1 1 d . . . . .
 O5 O 0.3821(2) 0.7717(6) 0.5298(3) 0.1037(13) Uani 1 1 d . . . . .
 F3 F 0.0629(2) 0.8480(6) 0.5690(2) 0.1328(15) Uani 1 1 d . . . . .
 F4 F 0.42596(19) 0.4988(7) 0.4265(3) 0.1376(16) Uani 1 1 d . . . . .
 F2 F 0.1750(2) 0.8474(7) 0.6437(2) 0.1368(15) Uani 1 1 d . . . . .
 O4 O 0.3027(3) 0.9956(8) 0.4515(3) 0.1205(16) Uani 1 1 d . . . . .
 F6 F 0.4084(2) 0.7628(8) 0.3444(3) 0.1611(18) Uani 1 1 d . . . . .
 C2 C 0.0935(3) 0.5682(8) 0.4433(3) 0.0694(14) Uani 1 1 d . . . . .
 C13 C 0.1157(2) 0.5004(8) 0.3069(3) 0.0676(14) Uani 1 1 d . . . . .
 H13A H 0.157372 0.505604 0.284904 0.081 Uiso 1 1 calc R U . . .
 H13B H 0.082370 0.610112 0.279877 0.081 Uiso 1 1 calc R U . . .
 C5 C 0.2141(2) 0.5177(7) 0.4570(3) 0.0629(13) Uani 1 1 d . . . . .
 C8 C 0.3089(3) 0.6650(8) 0.3926(3) 0.0679(13) Uani 1 1 d . . . . .
 C7 C 0.2778(2) 0.4746(8) 0.4247(3) 0.0690(14) Uani 1 1 d . . . . .
 H7A H 0.262667 0.375552 0.378557 0.083 Uiso 1 1 calc R U . . .
 H7B H 0.316444 0.411596 0.470214 0.083 Uiso 1 1 calc R U . . .
 C4 C 0.2145(2) 0.5402(9) 0.5372(3) 0.0728(15) Uani 1 1 d . . . . .
 C3 C 0.1377(2) 0.5883(10) 0.5378(3) 0.0742(15) Uani 1 1 d . . . . .
 C10 C 0.3309(3) 0.8302(11) 0.4607(4) 0.0849(17) Uani 1 1 d . . . . .
 C14 C 0.0773(3) 0.2954(9) 0.2833(3) 0.0840(17) Uani 1 1 d . . . . .
 H14A H 0.038527 0.285443 0.309844 0.101 Uiso 1 1 calc R U . . .
 H14B H 0.054722 0.290992 0.222018 0.101 Uiso 1 1 calc R U . . .
 C9 C 0.3753(4) 0.5987(13) 0.3666(5) 0.102(2) Uani 1 1 d . . . . .
 C1 C 0.1300(4) 0.8066(12) 0.5664(4) 0.097(2) Uani 1 1 d . . . . .
 C15 C 0.1268(3) 0.1131(9) 0.3096(4) 0.0942(18) Uani 1 1 d . . . . .
 H15A H 0.147365 0.112786 0.371195 0.113 Uiso 1 1 calc R U . . .
 H15B H 0.098233 -0.011860 0.293177 0.113 Uiso 1 1 calc R U . . .
 C6 C 0.2764(3) 0.5078(11) 0.6183(3) 0.108(2) Uani 1 1 d . . . . .
 H6A H 0.319906 0.469397 0.604459 0.162 Uiso 1 1 calc R U . . .
 H6B H 0.263535 0.400233 0.651223 0.162 Uiso 1 1 calc R U . . .
 H6C H 0.285172 0.633176 0.650803 0.162 Uiso 1 1 calc R U . . .
 C11 C 0.3938(9) 0.907(3) 0.6052(12) 0.112(5) Uani 0.5 1 d . U P A 1
 H11A H 0.357297 0.880215 0.633917 0.134 Uiso 0.5 1 calc R U P A 1
 H11B H 0.390971 1.050873 0.588558 0.134 Uiso 0.5 1 calc R U P A 1
 C12 C 0.4684(5) 0.8556(19) 0.6617(7) 0.211(5) Uani 1 1 d . . . . .
 H12A H 0.479442 0.938857 0.712219 0.317 Uiso 0.5 1 calc R U P A 1
 H12B H 0.470257 0.712583 0.677151 0.317 Uiso 0.5 1 calc R U P A 1
 H12C H 0.503726 0.882202 0.632069 0.317 Uiso 0.5 1 calc R U P A 1
 H12D H 0.494156 0.956466 0.702456 0.317 Uiso 0.5 1 calc R U P A 2
 H12E H 0.441013 0.766883 0.687502 0.317 Uiso 0.5 1 calc R U P A 2
 H12F H 0.502986 0.775104 0.643327 0.317 Uiso 0.5 1 calc R U P A 2
 H1 H 0.066(3) 0.439(8) 0.571(3) 0.091(19) Uiso 1 1 d . . . . .
 H6 H 0.162(4) 0.084(12) 0.210(5) 0.17(3) Uiso 1 1 d . . . . .
 C11A C 0.4201(9) 0.956(3) 0.5907(12) 0.112(5) Uani 0.5 1 d . U P A 2
 H11C H 0.446610 1.045417 0.562968 0.134 Uiso 0.5 1 calc R U P A 2
 H11D H 0.384166 1.037134 0.607479 0.134 Uiso 0.5 1 calc R U P A 2
 H3 H 0.255(4) 0.860(13) 0.324(6) 0.17(4) Uiso 1 1 d . . . . .

loop_
  _atom_site_aniso_label
  _atom_site_aniso_U_11
  _atom_site_aniso_U_22
  _atom_site_aniso_U_33
  _atom_site_aniso_U_23
  _atom_site_aniso_U_13
  _atom_site_aniso_U_12
 O2 0.068(2) 0.133(4) 0.063(2) 0.008(2) 0.0215(17) 0.014(2)
 O3 0.103(3) 0.080(3) 0.061(2) 0.010(2) 0.0096(19) -0.005(2)
 O1 0.074(2) 0.129(4) 0.058(2) 0.025(2) 0.0241(19) 0.004(2)
 N1 0.071(2) 0.076(3) 0.046(2) 0.002(2) 0.021(2) 0.003(2)
 O6 0.106(3) 0.100(3) 0.064(2) -0.014(2) 0.019(2) 0.018(2)
 F1 0.211(4) 0.100(3) 0.091(2) -0.002(2) 0.070(3) 0.000(3)
 F5 0.148(3) 0.160(4) 0.112(3) -0.034(3) 0.074(3) -0.002(3)
 O5 0.123(3) 0.091(3) 0.078(3) -0.013(2) 0.001(2) 0.005(2)
 F3 0.151(3) 0.143(4) 0.120(3) -0.007(2) 0.065(2) 0.043(3)
 F4 0.085(2) 0.184(4) 0.147(4) -0.006(3) 0.039(2) 0.026(2)
 F2 0.178(3) 0.157(4) 0.068(2) -0.037(2) 0.027(2) 0.005(3)
 O4 0.158(4) 0.079(3) 0.098(3) -0.004(3) -0.002(3) 0.005(3)
 F6 0.147(3) 0.191(5) 0.178(4) 0.005(4) 0.098(3) -0.047(3)
 C2 0.074(3) 0.080(4) 0.056(3) 0.006(3) 0.022(3) 0.007(3)
 C13 0.078(3) 0.079(4) 0.043(3) -0.005(3) 0.014(2) -0.001(3)
 C5 0.065(3) 0.067(4) 0.054(3) 0.000(3) 0.013(2) 0.003(2)
 C8 0.073(3) 0.071(4) 0.060(3) 0.001(3) 0.020(3) -0.001(3)
 C7 0.074(3) 0.073(4) 0.061(3) -0.001(3) 0.021(3) 0.007(3)
 C4 0.068(3) 0.100(5) 0.049(3) 0.007(3) 0.015(2) 0.001(3)
 C3 0.080(3) 0.099(5) 0.048(3) 0.006(3) 0.026(3) 0.007(3)
 C10 0.094(4) 0.080(5) 0.071(4) 0.011(4) 0.010(3) -0.003(4)
 C14 0.079(3) 0.097(5) 0.074(3) -0.018(3) 0.020(3) -0.012(3)
 C9 0.092(5) 0.124(6) 0.102(5) -0.005(5) 0.048(4) -0.011(5)
 C1 0.117(5) 0.121(6) 0.058(4) -0.004(4) 0.035(4) 0.014(4)
 C15 0.123(5) 0.077(4) 0.079(4) -0.009(3) 0.024(4) -0.016(4)
 C6 0.083(4) 0.180(7) 0.056(3) 0.014(4) 0.013(3) 0.006(4)
 C11 0.113(7) 0.114(7) 0.093(6) -0.006(5) 0.008(5) 0.003(6)
 C12 0.159(7) 0.283(14) 0.169(9) -0.066(10) 0.016(7) -0.015(8)
 C11A 0.113(7) 0.114(7) 0.093(6) -0.006(5) 0.008(5) 0.003(6)

_geom_special_details
;
 All esds (except the esd in the dihedral angle between two l.s. planes)
 are estimated using the full covariance matrix.  The cell esds are taken
 into account individually in the estimation of esds in distances, angles
 and torsion angles; correlations between esds in cell parameters are only
 used when they are defined by crystal symmetry.  An approximate (isotropic)
 treatment of cell esds is used for estimating esds involving l.s. planes.
;
loop_
  _geom_bond_atom_site_label_1
  _geom_bond_atom_site_label_2
  _geom_bond_distance
  _geom_bond_site_symmetry_2
  _geom_bond_publ_flag
 O2 C2 1.220(5) . ?
 O3 C8 1.389(6) . ?
 O3 H3 0.76(8) . ?
 O1 C3 1.414(6) . ?
 O1 H1 0.89(5) . ?
 N1 C2 1.341(5) . ?
 N1 C13 1.473(5) . ?
 N1 C5 1.431(5) . ?
 O6 C15 1.426(6) . ?
 O6 H6 1.01(8) . ?
 F1 C1 1.334(7) . ?
 F5 C9 1.330(7) . ?
 O5 C10 1.312(6) . ?
 O5 C11 1.48(2) . ?
 O5 C11A 1.59(2) . ?
 F3 C1 1.326(6) . ?
 F4 C9 1.326(7) . ?
 F2 C1 1.329(6) . ?
 O4 C10 1.190(7) . ?
 F6 C9 1.344(7) . ?
 C2 C3 1.535(6) . ?
 C13 H13A 0.9700 . ?
 C13 H13B 0.9700 . ?
 C13 C14 1.513(7) . ?
 C5 C7 1.496(6) . ?
 C5 C4 1.324(6) . ?
 C8 C7 1.533(6) . ?
 C8 C10 1.515(7) . ?
 C8 C9 1.519(8) . ?
 C7 H7A 0.9700 . ?
 C7 H7B 0.9700 . ?
 C4 C3 1.506(6) . ?
 C4 C6 1.507(6) . ?
 C3 C1 1.514(8) . ?
 C14 H14A 0.9700 . ?
 C14 H14B 0.9700 . ?
 C14 C15 1.495(7) . ?
 C15 H15A 0.9700 . ?
 C15 H15B 0.9700 . ?
 C6 H6A 0.9600 . ?
 C6 H6B 0.9600 . ?
 C6 H6C 0.9600 . ?
 C11 H11A 0.9700 . ?
 C11 H11B 0.9700 . ?
 C11 C12 1.488(19) . ?
 C12 H12A 0.9600 . ?
 C12 H12B 0.9600 . ?
 C12 H12C 0.9600 . ?
 C12 H12D 0.9600 . ?
 C12 H12E 0.9600 . ?
 C12 H12F 0.9600 . ?
 C12 C11A 1.412(19) . ?
 C11A H11C 0.9700 . ?
 C11A H11D 0.9700 . ?

loop_
  _geom_angle_atom_site_label_1
  _geom_angle_atom_site_label_2
  _geom_angle_atom_site_label_3
  _geom_angle
  _geom_angle_site_symmetry_1
  _geom_angle_site_symmetry_3
  _geom_angle_publ_flag
 C8 O3 H3 110(7) . . ?
 C3 O1 H1 108(3) . . ?
 C2 N1 C13 120.7(4) . . ?
 C2 N1 C5 110.2(4) . . ?
 C5 N1 C13 128.6(4) . . ?
 C15 O6 H6 107(4) . . ?
 C10 O5 C11 116.0(8) . . ?
 C10 O5 C11A 114.1(8) . . ?
 O2 C2 N1 126.3(4) . . ?
 O2 C2 C3 126.4(4) . . ?
 N1 C2 C3 107.3(4) . . ?
 N1 C13 H13A 109.0 . . ?
 N1 C13 H13B 109.0 . . ?
 N1 C13 C14 113.0(4) . . ?
 H13A C13 H13B 107.8 . . ?
 C14 C13 H13A 109.0 . . ?
 C14 C13 H13B 109.0 . . ?
 N1 C5 C7 121.0(4) . . ?
 C4 C5 N1 111.2(4) . . ?
 C4 C5 C7 127.8(4) . . ?
 O3 C8 C7 110.4(4) . . ?
 O3 C8 C10 109.9(5) . . ?
 O3 C8 C9 106.8(5) . . ?
 C10 C8 C7 111.4(4) . . ?
 C10 C8 C9 109.8(5) . . ?
 C9 C8 C7 108.3(5) . . ?
 C5 C7 C8 114.5(4) . . ?
 C5 C7 H7A 108.6 . . ?
 C5 C7 H7B 108.6 . . ?
 C8 C7 H7A 108.6 . . ?
 C8 C7 H7B 108.6 . . ?
 H7A C7 H7B 107.6 . . ?
 C5 C4 C3 108.4(4) . . ?
 C5 C4 C6 129.3(5) . . ?
 C3 C4 C6 122.1(4) . . ?
 O1 C3 C2 112.9(4) . . ?
 O1 C3 C4 111.2(4) . . ?
 O1 C3 C1 109.0(4) . . ?
 C4 C3 C2 102.6(4) . . ?
 C4 C3 C1 112.5(5) . . ?
 C1 C3 C2 108.6(4) . . ?
 O5 C10 C8 113.8(6) . . ?
 O4 C10 O5 124.3(6) . . ?
 O4 C10 C8 121.9(5) . . ?
 C13 C14 H14A 108.8 . . ?
 C13 C14 H14B 108.8 . . ?
 H14A C14 H14B 107.7 . . ?
 C15 C14 C13 113.9(4) . . ?
 C15 C14 H14A 108.8 . . ?
 C15 C14 H14B 108.8 . . ?
 F5 C9 F6 106.1(6) . . ?
 F5 C9 C8 112.0(5) . . ?
 F4 C9 F5 106.1(6) . . ?
 F4 C9 F6 106.8(6) . . ?
 F4 C9 C8 114.6(5) . . ?
 F6 C9 C8 110.7(6) . . ?
 F1 C1 C3 111.8(5) . . ?
 F3 C1 F1 106.6(6) . . ?
 F3 C1 F2 106.5(5) . . ?
 F3 C1 C3 112.7(6) . . ?
 F2 C1 F1 106.0(6) . . ?
 F2 C1 C3 112.8(5) . . ?
 O6 C15 C14 112.9(5) . . ?
 O6 C15 H15A 109.0 . . ?
 O6 C15 H15B 109.0 . . ?
 C14 C15 H15A 109.0 . . ?
 C14 C15 H15B 109.0 . . ?
 H15A C15 H15B 107.8 . . ?
 C4 C6 H6A 109.5 . . ?
 C4 C6 H6B 109.5 . . ?
 C4 C6 H6C 109.5 . . ?
 H6A C6 H6B 109.5 . . ?
 H6A C6 H6C 109.5 . . ?
 H6B C6 H6C 109.5 . . ?
 O5 C11 H11A 110.7 . . ?
 O5 C11 H11B 110.7 . . ?
 O5 C11 C12 105.3(13) . . ?
 H11A C11 H11B 108.8 . . ?
 C12 C11 H11A 110.7 . . ?
 C12 C11 H11B 110.7 . . ?
 C11 C12 H12A 109.5 . . ?
 C11 C12 H12B 109.5 . . ?
 C11 C12 H12C 109.5 . . ?
 H12A C12 H12B 109.5 . . ?
 H12A C12 H12C 109.5 . . ?
 H12B C12 H12C 109.5 . . ?
 H12D C12 H12E 109.5 . . ?
 H12D C12 H12F 109.5 . . ?
 H12E C12 H12F 109.5 . . ?
 C11A C12 H12D 109.5 . . ?
 C11A C12 H12E 109.5 . . ?
 C11A C12 H12F 109.5 . . ?
 O5 C11A H11C 111.0 . . ?
 O5 C11A H11D 111.0 . . ?
 C12 C11A O5 103.6(13) . . ?
 C12 C11A H11C 111.0 . . ?
 C12 C11A H11D 111.0 . . ?
 H11C C11A H11D 109.0 . . ?

loop_
  _geom_torsion_atom_site_label_1
  _geom_torsion_atom_site_label_2
  _geom_torsion_atom_site_label_3
  _geom_torsion_atom_site_label_4
  _geom_torsion
  _geom_torsion_site_symmetry_1
  _geom_torsion_site_symmetry_2
  _geom_torsion_site_symmetry_3
  _geom_torsion_site_symmetry_4
  _geom_torsion_publ_flag
 O2 C2 C3 O1 55.7(7) . . . . ?
 O2 C2 C3 C4 175.6(5) . . . . ?
 O2 C2 C3 C1 -65.2(7) . . . . ?
 O3 C8 C7 C5 -66.4(5) . . . . ?
 O3 C8 C10 O5 -176.1(4) . . . . ?
 O3 C8 C10 O4 5.0(8) . . . . ?
 O3 C8 C9 F5 -52.1(7) . . . . ?
 O3 C8 C9 F4 -173.0(6) . . . . ?
 O3 C8 C9 F6 66.1(7) . . . . ?
 O1 C3 C1 F1 -174.6(4) . . . . ?
 O1 C3 C1 F3 -54.6(6) . . . . ?
 O1 C3 C1 F2 66.0(6) . . . . ?
 N1 C2 C3 O1 -125.5(5) . . . . ?
 N1 C2 C3 C4 -5.7(6) . . . . ?
 N1 C2 C3 C1 113.5(5) . . . . ?
 N1 C13 C14 C15 -68.0(6) . . . . ?
 N1 C5 C7 C8 82.0(5) . . . . ?
 N1 C5 C4 C3 -2.7(6) . . . . ?
 N1 C5 C4 C6 172.0(5) . . . . ?
 C2 N1 C13 C14 -68.8(6) . . . . ?
 C2 N1 C5 C7 178.0(4) . . . . ?
 C2 N1 C5 C4 -1.2(6) . . . . ?
 C2 C3 C1 F1 -51.2(6) . . . . ?
 C2 C3 C1 F3 68.7(6) . . . . ?
 C2 C3 C1 F2 -170.7(5) . . . . ?
 C13 N1 C2 O2 -4.4(8) . . . . ?
 C13 N1 C2 C3 176.9(4) . . . . ?
 C13 N1 C5 C7 6.3(7) . . . . ?
 C13 N1 C5 C4 -172.9(5) . . . . ?
 C13 C14 C15 O6 -59.6(6) . . . . ?
 C5 N1 C2 O2 -176.8(5) . . . . ?
 C5 N1 C2 C3 4.4(5) . . . . ?
 C5 N1 C13 C14 102.1(5) . . . . ?
 C5 C4 C3 O1 126.0(5) . . . . ?
 C5 C4 C3 C2 5.1(6) . . . . ?
 C5 C4 C3 C1 -111.4(5) . . . . ?
 C7 C5 C4 C3 178.2(5) . . . . ?
 C7 C5 C4 C6 -7.0(10) . . . . ?
 C7 C8 C10 O5 61.1(6) . . . . ?
 C7 C8 C10 O4 -117.8(6) . . . . ?
 C7 C8 C9 F5 66.8(7) . . . . ?
 C7 C8 C9 F4 -54.0(7) . . . . ?
 C7 C8 C9 F6 -174.9(5) . . . . ?
 C4 C5 C7 C8 -99.1(6) . . . . ?
 C4 C3 C1 F1 61.6(6) . . . . ?
 C4 C3 C1 F3 -178.5(4) . . . . ?
 C4 C3 C1 F2 -57.8(6) . . . . ?
 C10 O5 C11 C12 -160.0(9) . . . . ?
 C10 O5 C11A C12 176.2(9) . . . . ?
 C10 C8 C7 C5 56.1(6) . . . . ?
 C10 C8 C9 F5 -171.3(5) . . . . ?
 C10 C8 C9 F4 67.9(7) . . . . ?
 C10 C8 C9 F6 -53.0(7) . . . . ?
 C9 C8 C7 C5 177.0(4) . . . . ?
 C9 C8 C10 O5 -58.9(6) . . . . ?
 C9 C8 C10 O4 122.2(7) . . . . ?
 C6 C4 C3 O1 -49.2(7) . . . . ?
 C6 C4 C3 C2 -170.2(5) . . . . ?
 C6 C4 C3 C1 73.4(7) . . . . ?
 C11 O5 C10 O4 12.3(11) . . . . ?
 C11 O5 C10 C8 -166.6(8) . . . . ?
 C11A O5 C10 O4 -16.3(11) . . . . ?
 C11A O5 C10 C8 164.9(8) . . . . ?

_olex2_submission_special_instructions  'No special instructions were received'
#
# h,k,l, Fc-squared, Fo-squared, sigma(Fo-squared), status flag
#


loop_
 _refln_index_h
 _refln_index_k
 _refln_index_l
 _refln_F_squared_calc
 _refln_F_squared_meas
 _refln_F_squared_sigma
 _refln_observed_status
   3   0   0       1670.34       1306.83        24.29 o
   4   0   0      27573.49      28123.07       327.24 o
   5   0   0        905.34        718.04        15.67 o
   6   0   0        914.78        851.59        17.85 o
   7   0   0       3372.11       3676.66        73.83 o
   8   0   0        308.31        263.68        16.32 o
   9   0   0        207.29        176.04        30.35 o
  10   0   0         88.98         71.94        21.79 o
  11   0   0        154.74        145.15        11.13 o
  12   0   0        321.77        294.00        14.14 o
  13   0   0        198.64        216.38        17.93 o
  14   0   0         64.86         44.10         8.20 o
  15   0   0         25.77         20.97        19.02 o
  16   0   0          0.03         -7.94        10.90 o
  17   0   0         48.66         17.73        12.20 o
  18   0   0          9.69         -4.65        15.69 o
  19   0   0          2.53        -16.83        16.83 o
  20   0   0         49.29         58.89        31.98 o
  21   0   0          3.64         18.36        29.21 o
  22   0   0          0.05          7.41        34.11 o
   1   1   0      20411.70      20533.48       296.38 o
   2   1   0       3679.96       3064.26        40.07 o
   3   1   0       2835.07       2656.39        29.29 o
   4   1   0        117.36         93.02         4.97 o
   5   1   0          0.01         -2.53         2.82 o
   6   1   0         85.76        102.12         7.05 o
   7   1   0         67.51         84.08         4.73 o
   8   1   0       1229.72       1289.81        25.65 o
   9   1   0        355.26        347.16        12.96 o
  10   1   0         15.67         19.39         3.59 o
  11   1   0          7.67          2.75         3.46 o
  12   1   0        224.06        247.19        11.68 o
  13   1   0         23.75         29.15         5.43 o
  14   1   0          4.26         -5.58         5.58 o
  15   1   0          5.70          2.96         6.77 o
  16   1   0         21.50         23.71         8.71 o
  17   1   0          0.45        -14.53        14.53 o
  18   1   0         20.67         13.21        14.62 o
  19   1   0          2.40         17.80        15.35 o
  20   1   0          0.01        -15.80        15.80 o
  21   1   0          0.01         29.56        17.34 o
  22   1   0          0.04          2.83        34.58 o
   0   2   0      14282.96      15061.88       241.83 o
   1   2   0       1253.90       1229.31        29.66 o
   2   2   0       1568.40       1552.24        27.08 o
   3   2   0       1535.78       1446.03        23.28 o
   4   2   0       1105.24       1034.47        18.54 o
   5   2   0        635.24        658.96        15.12 o
   6   2   0        301.85        331.68        10.30 o
   7   2   0       1389.57       1402.74        23.16 o
   8   2   0         76.67         94.90         6.69 o
   9   2   0       1000.21       1109.54        22.91 o
  10   2   0         80.60         63.55         9.69 o
  11   2   0          6.00          3.05         4.55 o
  12   2   0        383.98        444.00        14.94 o
  13   2   0        157.84        163.90        14.36 o
  14   2   0        285.11        340.32        24.02 o
  15   2   0         34.08         41.73         9.06 o
  16   2   0         65.36         54.79        13.88 o
  17   2   0          1.39         -9.91         9.91 o
  18   2   0          7.97         18.25        13.52 o
  19   2   0          5.21        -14.58        14.58 o
  20   2   0          8.26         18.51        19.11 o
  21   2   0          0.00        -19.75        19.75 o
  22   2   0          0.01         -5.84        22.25 o
   1   3   0         86.46         79.01        10.59 o
   2   3   0       1788.57       1913.90        54.70 o
   3   3   0        484.92        541.68        23.06 o
   4   3   0         72.40         79.14         8.19 o
   5   3   0          4.45         -5.88         5.88 o
   6   3   0         20.44         16.50         6.07 o
   7   3   0        403.92        385.29        22.30 o
   8   3   0         26.20         14.10         9.43 o
   9   3   0          1.06         -6.95         6.95 o
  10   3   0         48.05         60.41         8.88 o
  11   3   0          0.29         -6.73         6.73 o
  12   3   0         76.98        108.98        12.05 o
  13   3   0         29.43          5.71         8.53 o
  14   3   0        151.10        156.75        16.18 o
  15   3   0        124.08        130.97        15.57 o
  16   3   0         31.44         44.73        12.94 o
  17   3   0          0.06        -13.13        13.13 o
  18   3   0          8.08         10.15        14.33 o
  19   3   0          3.90        -17.94        17.94 o
  20   3   0          5.09         29.19        19.52 o
  21   3   0          0.76        -13.07        25.70 o
   0   4   0        870.57        908.26       133.55 o
   1   4   0        391.21        359.78        30.14 o
   2   4   0        258.80        288.91        22.05 o
   3   4   0        105.96         94.87        16.30 o
   4   4   0         10.13          6.06         9.39 o
   5   4   0         10.13         -8.60         9.91 o
   6   4   0        471.22        555.92        33.69 o
   7   4   0        120.84        112.78        11.63 o
   8   4   0        135.77        135.31        25.64 o
   9   4   0         12.11          1.60         8.97 o
  10   4   0          8.95          1.03        10.11 o
  11   4   0          0.96         -6.62        14.65 o
  12   4   0          6.58          0.93        11.54 o
  13   4   0         12.83        -10.22        10.22 o
  14   4   0         39.76         21.46        18.12 o
  15   4   0          0.70         -2.06        12.13 o
  16   4   0          9.96        -45.71        45.71 o
  17   4   0          0.32          3.72        26.67 o
  18   4   0          4.55        -53.11        53.11 o
  19   4   0          4.63        -17.14        17.14 o
   1   5   0         93.94         96.09        19.65 o
   2   5   0         72.69        108.10        22.64 o
   3   5   0          1.05        -12.29        12.29 o
   4   5   0        214.53        208.87        24.44 o
   5   5   0          1.87        -13.03        13.03 o
   6   5   0          5.12          0.01        13.23 o
   7   5   0         92.53         80.57        15.01 o
   8   5   0          8.83          7.11        12.77 o
   9   5   0         27.38         25.74        12.32 o
  10   5   0          7.99         -2.32        13.54 o
  11   5   0          3.65         -7.13        13.40 o
  12   5   0          0.21         -7.98        15.67 o
  13   5   0          1.85         -6.52        13.91 o
  14   5   0          0.68        -15.41        15.41 o
  15   5   0          7.24         49.77        17.16 o
  16   5   0          6.75        -22.06        22.06 o
  17   5   0          0.15         19.91        32.49 o
   0   6   0          7.61         35.49        24.14 o
   1   6   0          5.32         -2.08        15.20 o
   2   6   0         27.22        -41.13        41.13 o
   3   6   0         20.64        -10.61        14.72 o
   4   6   0          7.79          4.13        17.05 o
   5   6   0         31.97         26.44        15.69 o
   6   6   0         14.10         30.96        15.47 o
   7   6   0          0.03         -3.17        13.88 o
   8   6   0         53.44         37.78        17.76 o
   9   6   0         10.54          7.64        14.23 o
  10   6   0          6.63         12.12        16.58 o
  11   6   0          8.69          9.54        28.03 o
  12   6   0          4.43        -12.63        15.27 o
  13   6   0          0.00        -20.18        20.18 o
  14   6   0          3.23         -8.96        19.70 o
  15   6   0          0.21         16.70        26.44 o
   1   7   0         10.14          0.90        15.43 o
   2   7   0         14.49        -13.50        16.73 o
   3   7   0          0.00          1.31        15.77 o
   4   7   0          3.65        -37.94        37.94 o
   5   7   0         13.78         17.76        19.19 o
   6   7   0          1.01        -16.30        16.61 o
   7   7   0         13.26         11.72        29.53 o
   8   7   0          2.05        -19.48        19.48 o
   9   7   0          2.22        -16.12        16.12 o
  10   7   0         12.52         30.35        20.11 o
  11   7   0          0.37         -9.63        18.70 o
   0   8   0          1.63         -0.87        55.87 o
   1   8   0          0.27        -20.57        21.86 o
   2   8   0          3.05        -18.81        18.81 o
   3   8   0          0.02        -18.19        18.19 o
 -22   1   1          0.00        -26.88        40.64 o
 -21   1   1          0.22         -3.89        17.67 o
 -20   1   1         17.82          9.89        18.07 o
 -19   1   1         17.26         17.99        12.27 o
 -18   1   1          6.17          2.59         8.97 o
 -17   1   1        115.89        156.33        16.47 o
 -16   1   1         59.01         42.93         8.50 o
 -15   1   1        158.71        192.39        12.75 o
 -14   1   1         43.77         37.99         6.87 o
 -13   1   1        169.67        178.56         8.94 o
 -12   1   1        342.08        361.63        12.75 o
 -11   1   1         67.08         38.22         4.70 o
 -10   1   1         86.30         95.39         6.68 o
  -9   1   1        269.52        269.80         7.75 o
  -8   1   1        776.87        892.45        14.23 o
  -7   1   1        120.71        100.35         4.57 o
  -6   1   1       4569.98       4419.04        38.74 o
  -5   1   1         44.26         38.72         4.23 o
  -4   1   1         90.42         94.41         4.85 o
  -3   1   1       6766.31       6264.65        67.02 o
  -2   1   1        401.45        381.44        13.87 o
  -1   1   1         60.11         40.50        10.19 o
   0   1   1      10196.89       9338.80       144.92 o
   1   1   1       5873.46       5837.94        81.58 o
   2   1   1       3140.91       3050.75        39.27 o
   3   1   1       5325.38       5113.31        51.73 o
   4   1   1        326.26        304.66        13.49 o
   5   1   1         33.21         42.74         3.61 o
   6   1   1        367.41        377.07         8.58 o
   7   1   1         97.09        117.28         5.06 o
   8   1   1        587.42        709.79        17.02 o
   9   1   1       1922.89       2082.18        33.49 o
  10   1   1        109.86        114.39         7.04 o
  11   1   1         40.31         26.70         5.02 o
  12   1   1        206.85        219.45        11.30 o
  13   1   1        282.46        367.54        12.97 o
  14   1   1        314.46        338.70        17.90 o
  15   1   1          4.55          2.14         8.37 o
  16   1   1         56.93         66.52        11.02 o
  17   1   1         18.24          7.98        16.09 o
  18   1   1          4.69         -9.20        11.84 o
  19   1   1          4.94         -7.02        13.76 o
  20   1   1          7.95        -12.03        24.22 o
  21   1   1          1.72        -10.43        10.43 o
  22   1   1          0.02         22.21        25.72 o
 -22   2   1          1.04        -25.13        25.13 o
 -21   2   1          0.91         13.74        21.57 o
 -20   2   1          3.68        -13.62        22.23 o
 -19   2   1         14.58          8.27        14.12 o
 -18   2   1         34.53         22.29        20.19 o
 -17   2   1          8.56         -8.19        15.97 o
 -16   2   1         42.34         34.35         9.52 o
 -15   2   1          2.98          2.20         7.91 o
 -14   2   1         16.66          5.58         6.33 o
 -13   2   1         42.94         45.63        12.59 o
 -12   2   1          6.27         -3.41         5.38 o
 -11   2   1        278.41        261.37        12.72 o
 -10   2   1        386.87        470.34        15.04 o
  -9   2   1          8.21         -0.98         4.05 o
  -8   2   1         40.13         32.13         4.86 o
  -7   2   1        143.96        135.41         7.11 o
  -6   2   1        692.76        691.30        25.97 o
  -5   2   1        277.07        306.27        11.61 o
  -4   2   1        746.75        815.94        17.66 o
  -3   2   1       4936.30       4600.38        57.04 o
  -2   2   1          4.69         -4.41         4.41 o
  -1   2   1        119.59        154.85        18.86 o
   0   2   1       9326.68       9269.77       130.33 o
   1   2   1       2992.74       2828.52        44.71 o
   2   2   1         32.25         37.46         7.61 o
   3   2   1        611.97        643.64        17.08 o
   4   2   1        428.92        367.67        10.94 o
   5   2   1          9.17          1.58         5.01 o
   6   2   1        361.07        402.44        12.83 o
   7   2   1         36.59         24.84         4.44 o
   8   2   1         43.89         29.71         4.77 o
   9   2   1        117.67        156.06        11.94 o
  10   2   1         60.82         62.47         8.37 o
  11   2   1         84.56         90.28         8.28 o
  12   2   1         71.74         68.96         7.70 o
  13   2   1          0.86         -2.14         4.53 o
  14   2   1        264.23        324.43        27.18 o
  15   2   1         52.25         33.40        11.17 o
  16   2   1          3.69         -6.14        15.69 o
  17   2   1          5.85        -12.82        12.82 o
  18   2   1          2.06         -3.35        16.60 o
  19   2   1          9.20         10.54        20.22 o
  20   2   1          0.38          6.77        19.57 o
  21   2   1          0.61         -7.41        24.28 o
 -21   3   1          0.05         -0.17        25.18 o
 -20   3   1          3.09         -3.22        22.95 o
 -19   3   1          0.33        -16.92        16.92 o
 -18   3   1         20.63         28.89        21.49 o
 -17   3   1          0.51        -13.25        21.05 o
 -16   3   1         11.05         -2.65         9.15 o
 -15   3   1         25.60         21.74        13.44 o
 -14   3   1        138.05        127.75        15.62 o
 -13   3   1         53.70         66.34        10.79 o
 -12   3   1        130.44        117.15        11.19 o
 -11   3   1         13.50         10.35         6.92 o
 -10   3   1        175.76        213.55        14.51 o
  -9   3   1          6.89         13.30         6.19 o
  -8   3   1         66.17         62.75         9.14 o
  -7   3   1          4.30         -0.13         6.62 o
  -6   3   1        262.79        309.01        15.64 o
  -5   3   1       1156.25       1390.67        33.83 o
  -4   3   1         17.01         17.33         6.49 o
  -3   3   1        812.43        881.60        24.54 o
  -2   3   1         69.72         67.75         7.42 o
  -1   3   1        129.24        133.96        19.85 o
   0   3   1       4522.51       4701.23        84.19 o
   1   3   1        425.63        416.24        35.59 o
   2   3   1         51.34         36.45         6.21 o
   3   3   1        170.74        239.70        16.13 o
   4   3   1       1198.59       1186.28        36.59 o
   5   3   1         19.27         23.86         8.77 o
   6   3   1        153.92        159.92        11.80 o
   7   3   1        364.66        343.64        24.09 o
   8   3   1         21.67          8.92         6.03 o
   9   3   1        189.01        206.47        24.40 o
  10   3   1         57.85         53.10         7.55 o
  11   3   1          0.17          1.39         7.44 o
  12   3   1          5.40          1.86        13.46 o
  13   3   1         84.34        103.58        25.97 o
  14   3   1          5.30         10.71        17.48 o
  15   3   1         52.35         43.57        12.53 o
  16   3   1         17.20          0.12        12.80 o
  17   3   1          6.47          6.58        21.83 o
  18   3   1         19.19         10.19        15.32 o
  19   3   1          0.91         14.43        18.54 o
  20   3   1          9.14         -5.65        22.60 o
 -20   4   1          6.89         -3.10        35.55 o
 -19   4   1          3.16        -17.98        17.98 o
 -18   4   1          3.02          5.38        25.82 o
 -17   4   1          3.16          1.20        27.58 o
 -16   4   1         18.87         -2.00        15.24 o
 -15   4   1         11.18          3.72        12.72 o
 -14   4   1          0.66        -13.78        13.78 o
 -13   4   1          0.10         -9.98         9.98 o
 -12   4   1          1.55        -13.56        13.56 o
 -11   4   1          1.30         -8.82        10.20 o
 -10   4   1         25.59         14.60        18.91 o
  -9   4   1         41.00         35.30        12.17 o
  -8   4   1          4.93        -10.14        10.14 o
  -7   4   1          4.01         -1.09         9.56 o
  -6   4   1        149.73        174.78        28.00 o
  -5   4   1          2.04          0.08        12.20 o
  -4   4   1        112.94        144.23        30.42 o
  -3   4   1         33.02         82.84        13.31 o
  -2   4   1        395.92        372.05        36.41 o
  -1   4   1        467.68        492.10        31.26 o
   0   4   1         85.76         71.81        17.13 o
   1   4   1          2.67         -3.54         9.58 o
   2   4   1          1.11         -8.47         8.94 o
   3   4   1        246.37        233.07        23.98 o
   4   4   1         65.84         87.38        11.16 o
   5   4   1          0.27         -8.10         8.10 o
   6   4   1        346.96        339.08        17.88 o
   7   4   1         11.45          7.68         9.36 o
   8   4   1         47.79         35.40        10.08 o
   9   4   1         17.73         12.99         9.20 o
  10   4   1          8.09         12.22         9.24 o
  11   4   1          1.32          0.69        10.41 o
  12   4   1         23.68          8.60        10.86 o
  13   4   1          8.89         16.47        12.53 o
  14   4   1          4.42        -10.30        10.30 o
  15   4   1          7.96         22.27        15.32 o
  16   4   1         26.44         15.45        25.16 o
  17   4   1          0.39          1.34        17.46 o
  18   4   1          0.69        -26.84        26.84 o
  19   4   1          1.20        -18.41        21.09 o
 -18   5   1          0.00         11.21        44.98 o
 -17   5   1          0.74         11.08        29.98 o
 -16   5   1          0.24        -14.00        25.80 o
 -15   5   1          2.53         -8.82        15.82 o
 -14   5   1         40.34         79.74        18.10 o
 -13   5   1          0.95          5.55        13.74 o
 -12   5   1          1.34        -13.07        13.07 o
 -11   5   1          3.61        -14.88        14.88 o
 -10   5   1          0.02        -11.77        11.77 o
  -9   5   1          3.02         14.86        13.52 o
  -8   5   1          3.39          4.67        15.38 o
  -7   5   1          0.04        -13.59        13.59 o
  -6   5   1          0.07          2.96        13.58 o
  -5   5   1         44.18         48.28        14.78 o
  -4   5   1         70.75         61.02        13.00 o
  -3   5   1        179.50        207.37        20.64 o
  -2   5   1        280.02        368.89        28.41 o
  -1   5   1        110.41        100.64        24.02 o
   0   5   1          7.53        -11.90        16.81 o
   1   5   1        136.60        155.52        22.91 o
   2   5   1         61.09         66.92        15.61 o
   3   5   1         30.58         46.82        20.05 o
   4   5   1          5.59          8.26        12.97 o
   5   5   1          1.10         -5.04        12.02 o
   6   5   1         82.64         87.53        25.42 o
   7   5   1          0.65          1.33         9.98 o
   8   5   1          5.15         -3.40        16.56 o
   9   5   1          1.95         -1.56        17.42 o
  10   5   1          4.12        -12.39        12.39 o
  11   5   1          0.21         -6.33        16.99 o
  12   5   1          0.15          0.02        15.77 o
  13   5   1          9.98        -13.19        13.19 o
  14   5   1          1.74          4.24        15.02 o
  15   5   1          0.51        -15.12        15.12 o
  16   5   1          0.61        -22.05        22.05 o
  17   5   1          3.20        -21.15        21.15 o
 -15   6   1          1.72        -18.01        18.01 o
 -14   6   1          1.63        -14.95        16.47 o
 -13   6   1          0.04        -14.96        14.96 o
 -12   6   1          1.84        -11.29        13.65 o
 -11   6   1          6.68        -17.27        17.27 o
 -10   6   1          0.00        -12.75        25.06 o
  -9   6   1          0.27          7.81        15.98 o
  -8   6   1          3.72        -14.86        14.86 o
  -7   6   1         20.61         19.82        15.92 o
  -6   6   1          9.75        -13.67        13.67 o
  -5   6   1          7.07        -14.09        14.09 o
  -4   6   1          1.50        -12.80        12.80 o
  -3   6   1         14.86         -7.46        12.35 o
  -2   6   1         12.58         -0.67        21.12 o
  -1   6   1          8.83         11.26        16.71 o
   0   6   1         13.94         17.42        15.90 o
   1   6   1          1.77          1.76        13.26 o
   2   6   1          4.17         -6.61         6.61 o
   3   6   1          6.40         12.26        14.98 o
   4   6   1          6.75          1.51        13.93 o
   5   6   1          9.37          3.25        24.19 o
   6   6   1          7.81        -14.39        14.39 o
   7   6   1          0.87        -14.40        14.40 o
   8   6   1         31.69         17.01        17.61 o
   9   6   1          7.16        -14.15        16.91 o
  10   6   1          6.38         -2.05        15.23 o
  11   6   1          1.03          7.92        15.53 o
  12   6   1          1.81         12.06        16.38 o
  13   6   1          0.75        -19.69        22.48 o
  14   6   1          1.10         -8.90        20.26 o
 -11   7   1          1.03         -4.43        18.74 o
 -10   7   1          0.57         -7.97        23.64 o
  -9   7   1          0.61        -28.77        28.77 o
  -8   7   1          0.69        -15.53        15.53 o
  -7   7   1          0.01        -15.14        22.78 o
  -6   7   1          0.62        -16.85        16.85 o
  -5   7   1         13.71         17.34        26.58 o
  -4   7   1          0.44        -15.08        16.74 o
  -3   7   1          0.69        -16.23        16.23 o
  -2   7   1          1.82        -16.57        16.57 o
  -1   7   1          2.98        -10.46        23.02 o
   0   7   1          0.03        -22.76        22.76 o
   1   7   1          2.41         -3.65        18.92 o
   2   7   1          0.58        -16.80        16.80 o
   3   7   1          2.23         28.23        17.02 o
   4   7   1          0.55        -20.79        20.79 o
   5   7   1          2.40         -8.82         8.82 o
   6   7   1          0.61         -7.55         7.55 o
   7   7   1          0.15        -24.48        24.48 o
   8   7   1          0.78        -17.33        17.33 o
   9   7   1          0.01        -17.11        17.11 o
  10   7   1          1.17         19.25        20.97 o
  11   7   1          0.01         -3.57        31.41 o
  -3   8   1          0.20        -16.99        16.99 o
  -2   8   1          0.08        -18.60        18.60 o
  -1   8   1          0.28        -20.70        20.70 o
   0   8   1          0.02        -32.41        32.41 o
   1   8   1          0.06        -20.31        20.31 o
   2   8   1          0.15        -11.67        19.46 o
   3   8   1          0.00        -20.89        20.89 o
 -23   0   2          1.36         72.76        60.36 o
 -22   0   2          0.13         -3.35         3.35 o
 -21   0   2         14.30         19.35        58.14 o
 -20   0   2          0.47        -18.18        20.37 o
 -19   0   2         59.76         63.60        19.96 o
 -18   0   2         78.87        113.86        32.45 o
 -17   0   2        368.58        439.01        70.93 o
 -16   0   2        106.62         94.22        14.68 o
 -15   0   2        127.90        108.59        15.31 o
 -14   0   2         25.19         22.84         6.14 o
 -13   0   2          2.63         -0.24         5.88 o
 -12   0   2        960.29        975.19        33.83 o
 -11   0   2       1611.66       1907.93        63.95 o
 -10   0   2        596.18        566.05        17.79 o
  -9   0   2        485.13        426.74        12.82 o
  -8   0   2       1100.56       1110.21        70.05 o
  -7   0   2       3335.82       3286.02        42.74 o
  -6   0   2         48.31         45.85         5.07 o
  -5   0   2        459.56        372.63        10.15 o
  -4   0   2       5678.46       5139.71        63.76 o
  -3   0   2        224.22        171.08        16.23 o
  -2   0   2       4228.86       4356.85       100.77 o
  -1   0   2       3681.77       4054.43        75.27 o
   0   0   2      13722.17      15566.45       259.21 o
   1   0   2       9314.71       8187.63       142.89 o
   2   0   2       9745.78       8063.38       118.55 o
   3   0   2        792.54        549.47        15.50 o
   4   0   2        317.31        332.86        30.01 o
   5   0   2          2.47          3.99         3.65 o
   6   0   2         11.89          4.41         3.71 o
   7   0   2        668.77        605.63        16.80 o
   8   0   2        273.49        267.83        12.68 o
   9   0   2        222.88        282.47        14.01 o
  10   0   2       1216.94       1322.72        34.83 o
  11   0   2       1229.01       1240.85        75.83 o
  12   0   2         81.48         77.74        11.21 o
  13   0   2        154.12        124.33        46.83 o
  14   0   2        368.18        443.66        28.94 o
  15   0   2         24.95          5.37        10.93 o
  16   0   2         20.27         27.23        14.52 o
  17   0   2          2.13          4.02        21.66 o
  18   0   2          5.14         -4.45        29.75 o
  19   0   2          0.52         -4.31        16.97 o
  20   0   2          4.40         29.59        20.97 o
  21   0   2          0.12         58.87        28.01 o
  22   0   2          0.00          1.66        48.18 o
 -23   1   2          0.18        -52.64        52.64 o
 -22   1   2          0.66        -15.66        15.66 o
 -21   1   2          6.50        -19.16        19.42 o
 -20   1   2          2.85        -19.81        23.03 o
 -19   1   2         10.55         21.90        10.42 o
 -18   1   2          3.46        -26.45        26.45 o
 -17   1   2          0.79         -5.44        11.30 o
 -16   1   2         14.78          9.99         8.77 o
 -15   1   2         29.74         30.59         6.40 o
 -14   1   2         38.84         16.26         7.80 o
 -13   1   2        161.93        170.94         8.58 o
 -12   1   2          1.73         -0.79         9.15 o
 -11   1   2         25.22         32.24         6.32 o
 -10   1   2        150.26        139.00         7.66 o
  -9   1   2        174.21        195.83         9.56 o
  -8   1   2         37.18         24.55         3.34 o
  -7   1   2       1412.60       1456.99        27.72 o
  -6   1   2          3.37          0.37         2.73 o
  -5   1   2       1416.45       1251.47        17.26 o
  -4   1   2       2432.12       2291.28        31.64 o
  -3   1   2      20211.46      19624.17       243.72 o
  -2   1   2       1046.60       1206.19        35.06 o
  -1   1   2        858.37        674.57        32.84 o
   0   1   2        182.13        126.40         7.07 o
   1   1   2      11381.05      11242.84       137.06 o
   2   1   2       4863.64       4330.14        58.00 o
   3   1   2          0.72          0.26         3.91 o
   4   1   2          9.30          2.13         3.23 o
   5   1   2       1154.57       1027.86        16.16 o
   6   1   2       1892.42       1895.60        45.85 o
   7   1   2         13.44         14.59         3.25 o
   8   1   2        195.56        163.81         6.64 o
   9   1   2        235.62        269.97         9.93 o
  10   1   2         15.03          9.43         4.84 o
  11   1   2        105.31         98.68         8.88 o
  12   1   2        132.98        134.34         8.41 o
  13   1   2          8.39          6.49        10.26 o
  14   1   2         69.92         67.74        11.06 o
  15   1   2         21.93         22.82        14.55 o
  16   1   2         23.58         29.58        11.46 o
  17   1   2         24.25        -26.89        28.00 o
  18   1   2          5.66        -18.49        18.49 o
  19   1   2          1.13        -12.90        18.22 o
  20   1   2          9.29          7.42        37.70 o
  21   1   2          0.06        -18.10        18.10 o
 -22   2   2          1.70        -16.26        27.13 o
 -21   2   2          0.04        -20.73        20.73 o
 -20   2   2          1.94        -13.88        13.88 o
 -19   2   2          1.33        -17.58        17.58 o
 -18   2   2          0.47         -0.50        13.51 o
 -17   2   2         61.39         76.68        14.54 o
 -16   2   2         38.54         41.62        14.45 o
 -15   2   2         12.44         15.65         8.06 o
 -14   2   2         28.21         22.04        12.89 o
 -13   2   2        167.78        200.30        19.06 o
 -12   2   2          0.83          5.35         4.78 o
 -11   2   2        166.66        168.61        16.14 o
 -10   2   2         42.97         44.19         5.39 o
  -9   2   2         79.83         69.05         5.54 o
  -8   2   2        488.56        530.20        17.70 o
  -7   2   2         70.52         70.92         5.64 o
  -6   2   2       1646.35       1635.34        25.59 o
  -5   2   2        349.86        310.77        13.72 o
  -4   2   2       1958.50       1792.78        31.75 o
  -3   2   2       4123.84       3803.22        60.00 o
  -2   2   2       2284.79       2341.12        47.62 o
  -1   2   2         90.66         73.95         9.25 o
   0   2   2       5774.11       6076.52        80.52 o
   1   2   2       1731.00       1626.03        35.34 o
   2   2   2         87.62         67.77         6.76 o
   3   2   2         17.74         20.28         5.75 o
   4   2   2       1262.46       1204.08        22.98 o
   5   2   2       1002.52       1000.04        20.44 o
   6   2   2        585.28        602.87        16.54 o
   7   2   2       1833.54       1867.56        61.11 o
   8   2   2        152.28        122.49        19.86 o
   9   2   2        155.53        182.88        11.08 o
  10   2   2        113.90        109.88         8.77 o
  11   2   2          2.93         -5.34         5.34 o
  12   2   2         18.41         12.49         5.65 o
  13   2   2         56.20         48.00        13.65 o
  14   2   2        220.19        246.45        15.95 o
  15   2   2         31.19         31.36        11.99 o
  16   2   2         34.38         34.83        12.48 o
  17   2   2          9.01         -6.94        12.95 o
  18   2   2          8.65          8.83        15.76 o
  19   2   2          2.34        -16.81        16.81 o
  20   2   2          7.31          3.23        20.23 o
  21   2   2          2.23         16.00        20.29 o
 -21   3   2          0.00        -27.09        27.09 o
 -20   3   2          1.85         -3.48        29.99 o
 -19   3   2          9.23         23.19        25.39 o
 -18   3   2          1.48        -22.78        22.78 o
 -17   3   2          6.72        -18.05        20.31 o
 -16   3   2          5.58          8.50        14.90 o
 -15   3   2         15.10         17.92        13.99 o
 -14   3   2         18.45         23.42         9.56 o
 -13   3   2         14.52         17.07        12.91 o
 -12   3   2         80.51         84.51        18.11 o
 -11   3   2          3.64         -6.47         6.47 o
 -10   3   2        113.36        103.25        10.20 o
  -9   3   2        271.52        353.84        18.44 o
  -8   3   2        213.10        194.43        12.60 o
  -7   3   2          6.85          0.57         5.94 o
  -6   3   2         16.99          8.88         7.90 o
  -5   3   2        310.11        329.89        15.35 o
  -4   3   2       1111.80       1117.75        28.70 o
  -3   3   2         15.34          8.69         5.61 o
  -2   3   2       4374.05       5034.07        83.56 o
  -1   3   2       4386.16       4738.05        85.47 o
   0   3   2         63.69         79.81        10.83 o
   1   3   2        156.43        177.39        12.85 o
   2   3   2        115.29         97.85         9.75 o
   3   3   2        263.12        199.82        21.20 o
   4   3   2         77.84         58.29         8.16 o
   5   3   2          2.41         -5.74         5.74 o
   6   3   2        200.03        194.95        17.93 o
   7   3   2        207.04        209.63        15.23 o
   8   3   2          0.09         -0.94         6.48 o
   9   3   2          7.57         10.48         7.07 o
  10   3   2         16.70         15.46        10.70 o
  11   3   2          9.06          2.14         6.62 o
  12   3   2         77.95         83.79        17.56 o
  13   3   2          6.89         -1.94         8.97 o
  14   3   2          1.12        -10.62        10.62 o
  15   3   2         72.31        108.68        20.52 o
  16   3   2          4.86        -12.91        13.00 o
  17   3   2         10.80         10.90        24.47 o
  18   3   2          0.11         -7.04        16.52 o
  19   3   2          1.12         -6.83        17.55 o
  20   3   2          0.01        -13.53        21.44 o
 -20   4   2          1.03          0.22        35.72 o
 -19   4   2          0.50        -20.70        20.70 o
 -18   4   2          0.59        -18.10        18.10 o
 -17   4   2          0.37         -3.11        19.67 o
 -16   4   2          1.52        -11.31        21.44 o
 -15   4   2         21.42         15.19        13.09 o
 -14   4   2         45.95         29.46        19.12 o
 -13   4   2          2.30         -2.12        13.10 o
 -12   4   2         39.89         53.24        18.44 o
 -11   4   2         55.95         73.12        15.22 o
 -10   4   2        115.06        119.30        17.60 o
  -9   4   2          5.49          1.54        19.96 o
  -8   4   2        133.22        144.83        19.04 o
  -7   4   2         58.05         37.05        10.07 o
  -6   4   2        149.49        149.33        18.86 o
  -5   4   2         20.77          8.09         7.14 o
  -4   4   2         47.38         66.90         8.77 o
  -3   4   2        121.98        132.03        12.68 o
  -2   4   2        280.31        266.05        28.25 o
  -1   4   2        619.01        594.27        50.87 o
   0   4   2        170.26        193.09        24.12 o
   1   4   2        111.29         96.59         9.97 o
   2   4   2        118.72        131.87        10.53 o
   3   4   2        101.87         85.18        10.00 o
   4   4   2         11.84          9.22         7.80 o
   5   4   2        390.04        445.39        19.94 o
   6   4   2          1.32         -2.67         7.49 o
   7   4   2          1.03         -7.19         7.19 o
   8   4   2          3.92         14.68         7.34 o
   9   4   2         13.23         22.58         9.29 o
  10   4   2         46.33         54.53        10.82 o
  11   4   2         32.52         23.69        11.47 o
  12   4   2         50.89         20.99        17.60 o
  13   4   2          0.05        -12.34        12.34 o
  14   4   2          1.10        -12.12        12.12 o
  15   4   2          6.66          4.39        12.78 o
  16   4   2          0.40        -14.09        14.09 o
  17   4   2          0.02         -0.32        14.90 o
  18   4   2          1.16         -7.56        25.03 o
  19   4   2          0.12        -13.48        23.54 o
 -18   5   2          2.42         -9.48        43.21 o
 -17   5   2          1.09         29.16        23.41 o
 -16   5   2          0.46        -13.52        20.82 o
 -15   5   2         17.86         -1.29        17.59 o
 -14   5   2         14.35         18.19        18.79 o
 -13   5   2         12.92          3.52        13.69 o
 -12   5   2          0.80        -11.43        11.43 o
 -11   5   2          8.20          9.06        12.76 o
 -10   5   2          3.03        -16.00        16.00 o
  -9   5   2          4.68         -2.45        14.16 o
  -8   5   2          8.79         -3.02        13.67 o
  -7   5   2          0.12         -2.65        14.19 o
  -6   5   2          1.32        -13.50        13.50 o
  -5   5   2         49.33         51.96        14.13 o
  -4   5   2         90.47        101.35        17.46 o
  -3   5   2         22.65         45.89        12.94 o
  -2   5   2         58.52         45.50        23.52 o
  -1   5   2        237.17        240.78        38.86 o
   0   5   2         91.82        111.86        17.12 o
   1   5   2         82.63         49.50        15.20 o
   2   5   2          2.58        -11.78        11.78 o
   3   5   2        237.02        327.87        29.31 o
   4   5   2         31.44         13.84        12.80 o
   5   5   2         25.36         24.80        11.01 o
   6   5   2         53.60         44.67        11.86 o
   7   5   2          8.29          8.65        17.92 o
   8   5   2         29.79         27.06        11.90 o
   9   5   2          0.44         -6.27        11.12 o
  10   5   2         10.80         -2.99        18.06 o
  11   5   2          4.42          1.52        12.19 o
  12   5   2          6.78         24.53        12.83 o
  13   5   2          1.21        -37.40        37.40 o
  14   5   2         14.42         20.91        24.34 o
  15   5   2          4.10         16.80        22.57 o
  16   5   2          0.14         18.99        18.28 o
  17   5   2          0.00         13.79        38.03 o
 -15   6   2          1.10        -45.54        45.54 o
 -14   6   2          0.52        -18.33        18.33 o
 -13   6   2          2.84        -23.14        23.14 o
 -12   6   2          7.13        -11.94        14.24 o
 -11   6   2         12.98         -3.65        14.65 o
 -10   6   2          9.07        -26.32        26.32 o
  -9   6   2          7.22          7.70        14.64 o
  -8   6   2         11.34          6.15        15.43 o
  -7   6   2          1.47         -7.26        14.38 o
  -6   6   2         24.01          3.55        16.41 o
  -5   6   2         12.16          8.99        12.07 o
  -4   6   2         20.95         20.08        11.85 o
  -3   6   2         18.81         15.20        15.60 o
  -2   6   2          8.56          3.01        14.75 o
  -1   6   2         43.25         51.58        17.43 o
   0   6   2          8.07          3.62        12.78 o
   1   6   2          0.02        -17.10        17.10 o
   2   6   2        110.56        157.98        23.09 o
   3   6   2          4.94         12.70        17.03 o
   4   6   2         72.90         59.96        24.52 o
   5   6   2         14.86         10.96        13.25 o
   6   6   2          5.66        -12.38        12.38 o
   7   6   2          3.89        -12.62        13.82 o
   8   6   2         24.66         -9.93        16.38 o
   9   6   2          9.39        -15.86        15.86 o
  10   6   2          5.28         -0.81        17.29 o
  11   6   2          1.29        -20.15        20.15 o
  12   6   2          1.54         -9.24        28.09 o
  13   6   2          2.50        -14.19        18.27 o
  14   6   2          0.43        -27.71        32.36 o
 -12   7   2          3.48        -17.75        17.75 o
 -11   7   2          8.35        -11.20        20.56 o
 -10   7   2          5.34         10.32        17.12 o
  -9   7   2          2.49        -46.28        46.28 o
  -8   7   2          5.03        -18.02        18.02 o
  -7   7   2          1.42        -20.93        20.93 o
  -6   7   2         11.64          4.74        19.04 o
  -5   7   2          0.09        -17.07        17.07 o
  -4   7   2          6.69        -39.62        39.62 o
  -3   7   2          7.85         25.32        23.70 o
  -2   7   2          0.28        -17.04        17.62 o
  -1   7   2          9.20         -8.25        18.54 o
   0   7   2          2.85        -16.16        16.16 o
   1   7   2          0.71        -16.59        16.59 o
   2   7   2          0.12        -16.27        16.27 o
   3   7   2          0.01        -17.31        17.31 o
   4   7   2         16.25         18.47        21.17 o
   5   7   2          5.11        -11.38        20.97 o
   6   7   2          2.89        -17.52        17.52 o
   7   7   2          0.00        -17.95        17.95 o
   8   7   2          1.48        -15.41        15.41 o
   9   7   2          3.87         -8.16        19.57 o
  10   7   2          0.37        -19.95        19.95 o
  -3   8   2          3.86          3.56        16.38 o
  -2   8   2          0.38        -18.30        18.30 o
  -1   8   2          7.02        -20.00        20.00 o
   0   8   2          2.72          0.45        23.94 o
   1   8   2          0.00        -26.27        26.27 o
   2   8   2          0.39        -30.87        30.87 o
 -23   1   3          1.95         21.58        26.96 o
 -22   1   3          0.28        -13.95        13.95 o
 -21   1   3          7.56        -17.92        17.92 o
 -20   1   3         21.76          7.76        13.50 o
 -19   1   3          6.16          6.09        19.54 o
 -18   1   3         26.77         11.64         9.86 o
 -17   1   3         86.23         58.98        12.71 o
 -16   1   3         93.35         96.92        12.96 o
 -15   1   3         46.00         43.14         7.99 o
 -14   1   3         44.24         46.30         6.36 o
 -13   1   3          6.00          5.60         4.80 o
 -12   1   3          0.16          2.53         3.98 o
 -11   1   3         16.59         18.15         3.72 o
 -10   1   3        235.71        226.42        19.07 o
  -9   1   3        642.25        619.45        11.92 o
  -8   1   3       5422.74       5752.52        47.03 o
  -7   1   3       1587.47       1725.54        19.31 o
  -6   1   3       2063.42       1899.06        23.04 o
  -5   1   3        121.37        130.66         7.05 o
  -4   1   3      12321.94      12075.72       130.32 o
  -3   1   3      16630.56      17212.62       206.14 o
  -2   1   3         60.14         69.06         6.34 o
  -1   1   3       1157.47       1072.38        43.70 o
   0   1   3       1103.83       1050.47        19.21 o
   1   1   3       2189.31       2193.56        32.55 o
   2   1   3        777.31        574.30        15.64 o
   3   1   3        339.55        278.87         9.99 o
   4   1   3        269.73        299.16        10.79 o
   5   1   3       4859.04       5252.41        53.28 o
   6   1   3        188.29        144.72         9.18 o
   7   1   3          2.61          2.01         3.24 o
   8   1   3        317.27        295.94        12.04 o
   9   1   3          0.97          5.21         3.41 o
  10   1   3        105.28         91.79         8.58 o
  11   1   3         77.30         85.64        11.87 o
  12   1   3         17.23         10.63         4.61 o
  13   1   3         16.75          7.21         6.49 o
  14   1   3         57.88         38.66        10.66 o
  15   1   3         76.25         98.59        16.19 o
  16   1   3          0.81        -20.50        20.50 o
  17   1   3          2.93         -2.24        11.53 o
  18   1   3         12.29         11.53        17.36 o
  19   1   3          2.51          7.17        16.66 o
  20   1   3          4.66         44.02        19.73 o
  21   1   3          3.26        -27.01        27.01 o
 -22   2   3          6.47        -13.41        13.41 o
 -21   2   3          2.08          2.03        18.91 o
 -20   2   3          0.04          5.37        16.61 o
 -19   2   3          1.46          2.53        13.08 o
 -18   2   3          4.25         17.40        10.81 o
 -17   2   3         33.10          4.06        18.08 o
 -16   2   3          0.90        -10.61        11.52 o
 -15   2   3          4.57          5.70         6.84 o
 -14   2   3          0.00         -5.84         5.86 o
 -13   2   3        128.31        148.64        29.43 o
 -12   2   3         10.37          3.87         6.52 o
 -11   2   3         42.63         39.63         5.14 o
 -10   2   3        109.88         94.00         7.07 o
  -9   2   3         54.07         52.85         6.21 o
  -8   2   3         68.74         63.45         6.98 o
  -7   2   3         39.63         46.11         5.78 o
  -6   2   3         26.22         12.89         4.70 o
  -5   2   3          7.85          1.02         5.41 o
  -4   2   3       2428.43       2354.36        48.17 o
  -3   2   3        200.79        200.02        12.87 o
  -2   2   3       2776.90       2795.18        68.29 o
  -1   2   3        744.65        724.21        20.77 o
   0   2   3       4430.30       4448.38        62.45 o
   1   2   3       2527.03       2558.19        43.27 o
   2   2   3       1570.58       1500.64        40.15 o
   3   2   3        731.00        768.92        20.60 o
   4   2   3          0.56         -1.05         5.03 o
   5   2   3        900.15        890.21        45.84 o
   6   2   3        454.43        468.46        16.14 o
   7   2   3         12.16         14.12         5.16 o
   8   2   3        118.76        105.76        11.46 o
   9   2   3          0.10         -4.46         4.46 o
  10   2   3         22.95         17.15         5.40 o
  11   2   3         11.22          8.95         6.19 o
  12   2   3         21.98         15.45         6.26 o
  13   2   3         14.85          9.87         6.04 o
  14   2   3          7.76         -0.93         7.85 o
  15   2   3         89.21        123.79        17.24 o
  16   2   3          0.01        -10.93        10.93 o
  17   2   3          0.02        -21.49        21.49 o
  18   2   3          4.28        -16.03        16.03 o
  19   2   3          0.99         -5.94        18.67 o
  20   2   3          0.05          5.84        20.47 o
 -21   3   3          0.54        -19.85        19.85 o
 -20   3   3          2.54         13.59        25.21 o
 -19   3   3          1.84          8.77        15.13 o
 -18   3   3          7.40         22.41        17.86 o
 -17   3   3         10.42        -14.38        14.38 o
 -16   3   3         46.55         54.70        16.34 o
 -15   3   3        135.79        171.96        28.75 o
 -14   3   3         14.26         -7.48        11.47 o
 -13   3   3          6.76        -10.26        10.26 o
 -12   3   3          1.61          0.89         7.01 o
 -11   3   3         78.37         71.63         7.99 o
 -10   3   3          5.65          1.64         8.26 o
  -9   3   3         54.39         57.30         8.10 o
  -8   3   3        328.96        352.69        18.18 o
  -7   3   3        119.53        124.63        10.38 o
  -6   3   3        277.55        327.89        16.46 o
  -5   3   3         61.81         37.33        10.55 o
  -4   3   3       2253.51       2274.58        57.29 o
  -3   3   3        367.75        423.41        21.85 o
  -2   3   3        269.45        210.21        16.48 o
  -1   3   3        178.25        170.48        14.19 o
   0   3   3        409.38        420.78        31.06 o
   1   3   3        956.78        878.18        34.69 o
   2   3   3         17.86         16.38         7.92 o
   3   3   3        544.17        522.82        21.58 o
   4   3   3          4.54         -5.67         5.67 o
   5   3   3        483.86        516.64        23.01 o
   6   3   3        189.23        218.91        21.80 o
   7   3   3        525.67        644.29        27.41 o
   8   3   3         40.39         47.19         8.77 o
   9   3   3         24.88         28.72        16.88 o
  10   3   3         18.02         16.79         9.00 o
  11   3   3        229.45        260.24        15.84 o
  12   3   3          7.59          2.82         8.57 o
  13   3   3         20.93          8.16        10.43 o
  14   3   3         10.93         -2.67         9.84 o
  15   3   3         89.63        130.03        19.15 o
  16   3   3          7.08        -14.80        14.80 o
  17   3   3         16.68         -1.21        15.46 o
  18   3   3          1.60        -15.56        18.49 o
  19   3   3          2.13         36.20        32.83 o
 -20   4   3          1.71        -21.29        26.29 o
 -19   4   3          0.12        -33.35        33.35 o
 -18   4   3          3.07         -7.80        16.61 o
 -17   4   3         13.57         -7.69        16.91 o
 -16   4   3         10.67        -16.94        16.94 o
 -15   4   3          6.03         19.69        13.14 o
 -14   4   3         16.53          2.22        11.10 o
 -13   4   3         17.70         16.69        12.40 o
 -12   4   3          9.63         23.12        11.05 o
 -11   4   3         15.15         -0.58        13.54 o
 -10   4   3         47.71         51.66        11.67 o
  -9   4   3         78.03         85.98        15.95 o
  -8   4   3          1.46         -2.51         8.19 o
  -7   4   3          2.41         10.63         8.72 o
  -6   4   3         44.37         54.79         8.64 o
  -5   4   3         57.60         43.75         8.83 o
  -4   4   3          0.35         -7.01         7.01 o
  -3   4   3         24.49         10.87         6.92 o
  -2   4   3         39.72         48.56         8.16 o
  -1   4   3         15.13         17.66         9.66 o
   0   4   3         18.33          6.40         6.61 o
   1   4   3          0.18         -2.39         6.18 o
   2   4   3        461.49        459.80        20.92 o
   3   4   3          1.20          9.20         6.63 o
   4   4   3        230.24        302.63        18.06 o
   5   4   3          1.41         -7.56         7.67 o
   6   4   3          9.46         11.51         8.09 o
   7   4   3         12.74          7.45         9.07 o
   8   4   3        259.43        288.26        30.22 o
   9   4   3        100.48         98.54        13.27 o
  10   4   3         25.64         17.65        16.08 o
  11   4   3          3.85         -5.45        11.16 o
  12   4   3          2.57         -2.42        11.81 o
  13   4   3          3.23        -15.30        15.41 o
  14   4   3          4.96         -3.48        12.28 o
  15   4   3          3.07         -2.97        20.65 o
  16   4   3          6.86        -15.12        15.12 o
  17   4   3          0.43        -17.79        18.85 o
  18   4   3          1.50          9.73        21.63 o
 -18   5   3          2.75         10.86        30.07 o
 -17   5   3          0.49         33.18        22.20 o
 -16   5   3          4.22          5.55        35.30 o
 -15   5   3          7.19        -15.43        15.43 o
 -14   5   3          8.47         -1.83        17.67 o
 -13   5   3         45.85         78.00        19.24 o
 -12   5   3         14.88         20.06        13.16 o
 -11   5   3          2.21         -5.42        13.63 o
 -10   5   3         15.47         10.17        12.51 o
  -9   5   3         13.35         29.50        18.96 o
  -8   5   3         32.96         20.09        10.79 o
  -7   5   3          9.36         -8.85        10.51 o
  -6   5   3          3.75        -10.49        12.35 o
  -5   5   3         76.72        103.28        14.10 o
  -4   5   3        268.71        272.58        18.62 o
  -3   5   3          5.37         -2.36        12.09 o
  -2   5   3          6.67         -4.25        12.89 o
  -1   5   3          1.12          3.60        12.06 o
   0   5   3        233.31        247.22        33.75 o
   1   5   3         83.60         98.88        17.47 o
   2   5   3          0.39         -7.70         7.70 o
   3   5   3         10.03          9.96        12.63 o
   4   5   3          8.24          3.65        12.87 o
   5   5   3        107.04        109.87        15.11 o
   6   5   3         19.44         10.20        11.23 o
   7   5   3         57.01         50.11        14.62 o
   8   5   3          0.00         -3.45         9.69 o
   9   5   3          2.01         12.93        12.38 o
  10   5   3          6.25          1.82        12.26 o
  11   5   3          0.05        -10.47        12.38 o
  12   5   3          4.19        -11.89        11.89 o
  13   5   3          9.96         11.33        19.12 o
  14   5   3          0.14        -12.89        19.49 o
  15   5   3          0.28         -0.23        23.21 o
  16   5   3          1.59         14.75        20.03 o
 -16   6   3          0.45        -33.65        33.65 o
 -15   6   3          0.46        -12.27        21.84 o
 -14   6   3          0.18        -15.30        21.44 o
 -13   6   3          0.00          4.47        16.71 o
 -12   6   3          0.01         -2.64        20.17 o
 -11   6   3          0.02        -11.36        16.70 o
 -10   6   3          1.04        -15.63        15.63 o
  -9   6   3          0.01        -17.42        17.42 o
  -8   6   3         11.81         -3.91        20.54 o
  -7   6   3          0.01        -15.19        15.19 o
  -6   6   3         15.97         28.97        16.45 o
  -5   6   3          3.24         14.15        16.56 o
  -4   6   3         36.73         33.80        22.20 o
  -3   6   3         30.32          5.31        17.11 o
  -2   6   3         11.49         -7.71        13.33 o
  -1   6   3         31.11         30.12        13.08 o
   0   6   3         41.99          5.49        13.94 o
   1   6   3         20.73         13.98        20.88 o
   2   6   3          0.00        -14.45        14.45 o
   3   6   3         32.42         34.65        14.79 o
   4   6   3         42.90         14.91        16.25 o
   5   6   3          2.48         -4.56        14.03 o
   6   6   3          2.04        -14.09        14.09 o
   7   6   3          0.22         -5.27        15.47 o
   8   6   3         26.62         22.03        17.69 o
   9   6   3         14.86         -1.71        19.73 o
  10   6   3          1.02        -16.56        16.56 o
  11   6   3          3.71         -5.12        21.91 o
  12   6   3          0.09        -15.52        15.52 o
  13   6   3          1.41         -4.58        19.90 o
 -12   7   3          0.15        -22.08        22.08 o
 -11   7   3          0.70        -15.50        17.71 o
 -10   7   3          0.06        -13.10        17.05 o
  -9   7   3          0.01         -4.43         4.43 o
  -8   7   3          0.84         -8.99        21.32 o
  -7   7   3          2.49         14.88        18.41 o
  -6   7   3          1.48        -20.38        20.38 o
  -5   7   3          1.83        -17.43        17.43 o
  -4   7   3          2.04        -16.59        16.59 o
  -3   7   3          0.37         -9.51        15.11 o
  -2   7   3          0.84        -14.30        14.30 o
  -1   7   3          0.30        -35.33        35.33 o
   0   7   3          0.02        -16.32        16.32 o
   1   7   3          0.02        -10.63        16.75 o
   2   7   3          0.83        -14.80        14.80 o
   3   7   3          6.75         29.25        19.07 o
   4   7   3          0.06        -16.86        16.86 o
   5   7   3         15.10        -19.97        19.97 o
   6   7   3          0.00        -16.99        16.99 o
   7   7   3          0.43        -17.39        17.39 o
   8   7   3          0.01        -18.36        18.36 o
   9   7   3          2.63        -18.48        18.48 o
  -2   8   3          0.17         10.10        22.84 o
  -1   8   3          0.91        -28.80        28.80 o
   0   8   3          0.33          1.21        20.01 o
 -23   0   4          1.51        -40.92        40.92 o
 -22   0   4          5.75        -16.48        62.13 o
 -21   0   4          3.82        -53.65        53.65 o
 -20   0   4         39.37         29.97        25.30 o
 -19   0   4          0.00         23.22        28.19 o
 -18   0   4        135.28        176.39        46.59 o
 -17   0   4          8.39         10.18        35.80 o
 -16   0   4          0.10         -8.62         8.62 o
 -15   0   4        151.39        166.76        44.32 o
 -14   0   4        188.61        183.85        20.24 o
 -13   0   4         11.73        -11.21        12.54 o
 -12   0   4         75.43         84.28         8.57 o
 -11   0   4          3.55         -4.95         4.95 o
 -10   0   4        642.38        553.57        16.72 o
  -9   0   4       3757.64       4207.62        65.69 o
  -8   0   4        885.93       1070.81        30.60 o
  -7   0   4      27326.35      29025.50       336.41 o
  -6   0   4       4214.10       4083.38       116.45 o
  -5   0   4       2554.89       2308.84        38.64 o
  -4   0   4        542.99        600.78        29.35 o
  -3   0   4       4824.16       4775.08        92.32 o
  -2   0   4       3395.22       3013.01        48.57 o
  -1   0   4      13054.95      13615.71       178.66 o
   0   0   4       2951.53       3186.81        55.21 o
   1   0   4        809.92        823.48        22.82 o
   2   0   4       8382.47       8238.73       120.75 o
   3   0   4       9606.97       9722.86       150.66 o
   4   0   4        141.23        113.04         9.84 o
   5   0   4       1873.38       2054.82        40.75 o
   6   0   4          0.03         -4.84         4.84 o
   7   0   4        581.17        448.13        19.40 o
   8   0   4          0.05          3.74        10.15 o
   9   0   4        148.95        185.49        16.41 o
  10   0   4        139.85        162.06        31.05 o
  11   0   4          0.54         -4.07         6.67 o
  12   0   4         21.18         19.66        11.88 o
  13   0   4        193.95        292.37        74.54 o
  14   0   4        233.31        262.64        56.28 o
  15   0   4        205.17        234.72        46.35 o
  16   0   4          0.10        -19.92        19.92 o
  17   0   4         13.50         31.54        20.77 o
  18   0   4          9.85         -9.17        19.42 o
  19   0   4          6.51         -0.40        24.83 o
  20   0   4          2.63        -20.72        20.72 o
 -23   1   4          0.15        -20.46        30.48 o
 -22   1   4          0.06        -28.17        28.17 o
 -21   1   4          0.92        -12.73        15.01 o
 -20   1   4          4.16        -31.71        31.71 o
 -19   1   4          0.08        -26.65        26.65 o
 -18   1   4          6.85         13.39        11.74 o
 -17   1   4         46.41         64.46        16.50 o
 -16   1   4          2.91         -8.80         8.80 o
 -15   1   4         79.26         96.98        10.11 o
 -14   1   4         38.29         29.97         8.41 o
 -13   1   4         71.51         53.20         5.92 o
 -12   1   4          0.20        -18.34        18.34 o
 -11   1   4        207.79        225.55         8.76 o
 -10   1   4        436.17        452.14        13.31 o
  -9   1   4       3038.29       3433.79        37.68 o
  -8   1   4       2187.93       2379.57        29.01 o
  -7   1   4       1496.06       1288.44        19.39 o
  -6   1   4       1849.60       1667.33        25.28 o
  -5   1   4       2028.67       1841.26        30.10 o
  -4   1   4        395.53        315.91        11.13 o
  -3   1   4        723.23        697.50        15.71 o
  -2   1   4         81.69         65.66         5.44 o
  -1   1   4        426.46        323.62         9.66 o
   0   1   4        168.40        186.52         7.45 o
   1   1   4       3029.44       3062.98        38.86 o
   2   1   4        450.45        432.08        16.28 o
   3   1   4         23.85         18.02         6.22 o
   4   1   4        105.51        101.98        13.74 o
   5   1   4         31.26         32.80         4.28 o
   6   1   4       2050.71       1916.78        29.42 o
   7   1   4        118.96        128.25         9.19 o
   8   1   4        147.38        128.50         7.03 o
   9   1   4         33.12         24.32         5.53 o
  10   1   4          2.34         -1.06         4.66 o
  11   1   4         11.01          9.99         8.42 o
  12   1   4          6.88          4.34         6.67 o
  13   1   4          9.95          1.64         9.57 o
  14   1   4          1.00          3.53        11.66 o
  15   1   4         19.80          5.61        12.57 o
  16   1   4         10.76         17.15        14.72 o
  17   1   4         12.19         -1.01        15.28 o
  18   1   4          0.07        -26.52        26.52 o
  19   1   4          8.09         -9.89        17.19 o
  20   1   4          0.32        -13.05        18.94 o
 -23   2   4          2.33        -37.66        37.66 o
 -22   2   4          0.02        -22.54        22.54 o
 -21   2   4          0.44        -16.40        16.40 o
 -20   2   4         27.72         37.30        14.60 o
 -19   2   4         17.55         -8.66        17.99 o
 -18   2   4          8.60         17.97        14.54 o
 -17   2   4          0.00          5.94        11.63 o
 -16   2   4         62.49         66.56        14.10 o
 -15   2   4        114.20        134.50        10.51 o
 -14   2   4          0.89         -5.58         5.58 o
 -13   2   4          2.53          3.14         5.17 o
 -12   2   4         67.47         59.66         6.97 o
 -11   2   4         14.85         22.36         4.98 o
 -10   2   4         13.70         25.31         4.75 o
  -9   2   4        557.70        561.63        17.10 o
  -8   2   4       3126.51       3458.42        55.11 o
  -7   2   4         88.11         91.84         8.27 o
  -6   2   4        333.42        269.12        14.00 o
  -5   2   4       3058.14       3056.40        51.78 o
  -4   2   4         14.62          9.03         6.56 o
  -3   2   4        384.89        350.95        28.35 o
  -2   2   4          1.08         -3.25         5.49 o
  -1   2   4        950.84        990.99        25.09 o
   0   2   4          0.07         -2.40         4.75 o
   1   2   4       1191.85       1170.09        26.28 o
   2   2   4       2102.63       2267.51        36.37 o
   3   2   4        761.94        930.61        22.25 o
   4   2   4        339.59        420.37        18.70 o
   5   2   4       2833.69       3066.81        53.84 o
   6   2   4        192.26        198.52        10.66 o
   7   2   4        231.04        252.40        12.11 o
   8   2   4        138.85        135.59        11.42 o
   9   2   4          0.02         -3.97         3.97 o
  10   2   4         18.98          6.13         5.10 o
  11   2   4         81.95         93.50         8.20 o
  12   2   4          0.18         -1.30         5.65 o
  13   2   4          4.26         -7.26         9.43 o
  14   2   4         11.04        -10.74        10.74 o
  15   2   4         15.74         12.68        14.29 o
  16   2   4         20.56          1.51        18.22 o
  17   2   4         11.68          4.16        21.43 o
  18   2   4          8.92         11.92        15.53 o
  19   2   4          0.28        -18.53        18.53 o
  20   2   4          0.02        -16.24        19.15 o
 -22   3   4          2.45        -18.39        20.69 o
 -21   3   4          0.08        -24.13        24.13 o
 -20   3   4          8.17         -0.34        20.82 o
 -19   3   4          0.47         -2.33         2.33 o
 -18   3   4          0.67        -16.33        16.42 o
 -17   3   4          6.73        -25.23        25.23 o
 -16   3   4          0.01        -11.78        11.78 o
 -15   3   4          0.11          3.98        10.93 o
 -14   3   4        254.71        282.88        16.18 o
 -13   3   4        120.61        152.25        14.28 o
 -12   3   4         57.00         47.08        12.18 o
 -11   3   4         10.19          3.74         6.69 o
 -10   3   4        159.98        162.64        24.92 o
  -9   3   4          2.30          3.34         7.03 o
  -8   3   4        164.58        169.76        14.74 o
  -7   3   4         80.24         76.41         9.90 o
  -6   3   4        884.41       1013.15        41.57 o
  -5   3   4        110.85         95.32        12.99 o
  -4   3   4          8.58         10.73         8.59 o
  -3   3   4         10.73          4.47         7.26 o
  -2   3   4        505.44        538.51        30.02 o
  -1   3   4         59.48         55.25        13.68 o
   0   3   4       1856.97       1903.28        57.65 o
   1   3   4         38.47         46.65        13.45 o
   2   3   4        426.49        442.44        39.92 o
   3   3   4         33.12         24.04         9.39 o
   4   3   4        152.16        115.46        12.25 o
   5   3   4         17.18         29.52        10.10 o
   6   3   4        190.71        210.68        16.39 o
   7   3   4        171.43        145.13        15.10 o
   8   3   4        411.13        521.02        26.13 o
   9   3   4         24.69         35.02         7.84 o
  10   3   4         39.49         29.65        13.79 o
  11   3   4         49.15         54.26        17.60 o
  12   3   4          0.31         -9.36         9.36 o
  13   3   4          8.88          8.87         9.25 o
  14   3   4         15.29         10.18        10.49 o
  15   3   4         21.14         35.70        21.49 o
  16   3   4          1.52         -0.22        16.64 o
  17   3   4          0.01        -15.68        20.37 o
  18   3   4          0.43        -18.78        18.78 o
  19   3   4          0.01         -8.49        18.09 o
 -20   4   4          1.60        -14.75        20.26 o
 -19   4   4          0.20        -24.56        28.72 o
 -18   4   4          0.03        -16.58        16.58 o
 -17   4   4          6.65        -13.97        26.73 o
 -16   4   4          1.97         -5.45        16.00 o
 -15   4   4         66.28         75.75        16.72 o
 -14   4   4          0.04          0.38        10.01 o
 -13   4   4        253.60        304.82        37.64 o
 -12   4   4          0.09        -10.40        10.40 o
 -11   4   4          3.18          1.88         9.10 o
 -10   4   4          2.42         -9.74         9.74 o
  -9   4   4         73.72         78.13        12.36 o
  -8   4   4          8.27         20.23        12.60 o
  -7   4   4        488.65        495.32        21.85 o
  -6   4   4        122.48        127.73        12.39 o
  -5   4   4         10.56          6.33         8.17 o
  -4   4   4          0.54         -9.88         9.88 o
  -3   4   4        183.86        221.38        19.88 o
  -2   4   4         93.05         69.53        13.85 o
  -1   4   4         23.16         30.71        12.15 o
   0   4   4         39.58         33.84        12.78 o
   1   4   4         11.81         14.56        13.19 o
   2   4   4         57.04         76.99        13.43 o
   3   4   4         21.49         33.83         9.68 o
   4   4   4         27.57         23.49         9.41 o
   5   4   4         12.05         16.01        10.55 o
   6   4   4         11.77         20.77         9.05 o
   7   4   4          0.33          8.55         9.34 o
   8   4   4         13.79         32.20        11.74 o
   9   4   4         54.63         68.89        15.64 o
  10   4   4         11.60          8.96        14.57 o
  11   4   4          0.07        -11.31        11.31 o
  12   4   4         39.39          7.93        12.33 o
  13   4   4          2.59         -3.11        13.07 o
  14   4   4          0.86          0.18        13.56 o
  15   4   4          0.93          4.57        15.99 o
  16   4   4          0.25         -2.53        16.64 o
  17   4   4          0.11         12.91        26.01 o
 -18   5   4          0.60         -8.66        24.92 o
 -17   5   4          0.01        -17.37        17.37 o
 -16   5   4          3.39          5.09        31.14 o
 -15   5   4         14.32         12.40        27.85 o
 -14   5   4          7.79        -33.65        33.65 o
 -13   5   4          0.11          3.17        14.60 o
 -12   5   4          2.23         13.27        13.38 o
 -11   5   4         28.54         41.73        15.14 o
 -10   5   4          3.83         -8.98        12.70 o
  -9   5   4          0.05        -11.65        11.65 o
  -8   5   4         13.50         21.31        13.23 o
  -7   5   4         20.95          8.94         8.93 o
  -6   5   4          0.18         -9.04         9.04 o
  -5   5   4         59.78         30.05        11.02 o
  -4   5   4         46.38         72.49        12.22 o
  -3   5   4          7.27         -7.69         7.69 o
  -2   5   4        296.53        266.56        22.23 o
  -1   5   4        362.24        367.57        40.20 o
   0   5   4         28.19         45.47        14.49 o
   1   5   4          0.23         -9.04         9.04 o
   2   5   4         28.97         17.56         9.74 o
   3   5   4          1.48        -10.88        10.88 o
   4   5   4          7.90        -10.45        10.45 o
   5   5   4          0.06         -9.74         9.74 o
   6   5   4          0.01          2.08        10.94 o
   7   5   4         16.73        -14.12        14.12 o
   8   5   4          0.21         -8.59        19.02 o
   9   5   4         26.13         42.36        26.73 o
  10   5   4          1.82         -7.66        12.32 o
  11   5   4          9.86         13.28        12.75 o
  12   5   4          0.00        -15.25        19.17 o
  13   5   4          8.36          1.44        19.87 o
  14   5   4          0.51        -14.73        25.45 o
  15   5   4          0.19        -19.75        19.75 o
  16   5   4          0.00        -22.01        22.01 o
 -16   6   4          4.52         -9.29        23.76 o
 -15   6   4          0.00        -18.19        18.19 o
 -14   6   4          0.30        -18.93        18.93 o
 -13   6   4          0.01         -7.20        23.45 o
 -12   6   4          3.81         11.44        21.27 o
 -11   6   4          0.28        -16.55        16.55 o
 -10   6   4          0.08        -14.51        14.51 o
  -9   6   4          6.24         -9.58         9.58 o
  -8   6   4          3.40        -17.77        17.77 o
  -7   6   4         17.82         -2.16        14.28 o
  -6   6   4          0.12         -9.39        16.57 o
  -5   6   4         11.77        -14.15        14.15 o
  -4   6   4         10.05         10.47        14.40 o
  -3   6   4         82.42         87.87        25.70 o
  -2   6   4         40.76         33.10        15.08 o
  -1   6   4        119.93        149.57        20.93 o
   0   6   4          1.09        -16.78        16.78 o
   1   6   4         69.76         38.28        35.28 o
   2   6   4         15.33         21.65        14.16 o
   3   6   4         15.93          7.63        14.10 o
   4   6   4          0.69         -1.64        13.83 o
   5   6   4          0.52        -16.81        16.81 o
   6   6   4          9.57          2.83        15.97 o
   7   6   4          2.44        -15.60        15.60 o
   8   6   4          6.45        -11.40        15.82 o
   9   6   4          0.78        -12.22        16.59 o
  10   6   4          0.02         -5.93        21.99 o
  11   6   4          0.22        -17.13        17.13 o
  12   6   4          2.07        -14.78        14.78 o
  13   6   4          2.61        -16.53        21.61 o
 -12   7   4          6.28         13.87        21.18 o
 -11   7   4          0.00        -21.24        21.24 o
 -10   7   4          0.59        -10.30        15.84 o
  -9   7   4          0.35        -17.22        17.22 o
  -8   7   4          0.45        -16.51        16.51 o
  -7   7   4          2.14        -13.90        17.76 o
  -6   7   4          2.70        -17.20        17.20 o
  -5   7   4          0.07        -15.79        15.79 o
  -4   7   4          2.75        -15.88        15.88 o
  -3   7   4          0.07         12.07        14.68 o
  -2   7   4          1.45         -7.67        18.23 o
  -1   7   4          0.00        -25.12        25.12 o
   0   7   4          4.71          5.84        15.41 o
   1   7   4          5.53         -5.11        15.60 o
   2   7   4          2.40         -8.00        19.09 o
   3   7   4          7.06        -18.69        20.95 o
   4   7   4          0.64         -7.94        25.23 o
   5   7   4          0.62          5.02        21.60 o
   6   7   4          1.78        -14.48        18.89 o
   7   7   4          0.65        -15.56        15.56 o
   8   7   4          1.22        -18.72        18.72 o
   9   7   4          0.52          1.72        17.33 o
 -23   1   5          2.64        -32.60        32.60 o
 -22   1   5          0.23        -19.27        19.27 o
 -21   1   5          3.57        -16.41        16.41 o
 -20   1   5         19.01          4.09        13.70 o
 -19   1   5          0.83        -22.57        22.57 o
 -18   1   5         24.11         11.76        13.42 o
 -17   1   5         77.28         73.03        19.53 o
 -16   1   5          1.32         -8.69         8.87 o
 -15   1   5        137.43        169.20        19.33 o
 -14   1   5         20.49         14.03         5.72 o
 -13   1   5        101.57         82.77         6.40 o
 -12   1   5          0.22          1.38         3.41 o
 -11   1   5        480.12        512.81        20.81 o
 -10   1   5         70.72         72.02         5.50 o
  -9   1   5        125.15        127.75         6.97 o
  -8   1   5        469.72        440.56        22.76 o
  -7   1   5       2336.58       2506.29        36.39 o
  -6   1   5         23.53         18.01         4.64 o
  -5   1   5        713.20        762.77        18.34 o
  -4   1   5        462.89        450.54        13.96 o
  -3   1   5         36.36         36.83         4.54 o
  -2   1   5          2.73          3.15         3.57 o
  -1   1   5        674.33        765.71        15.55 o
   0   1   5       4676.53       4474.51        48.49 o
   1   1   5       1915.04       2068.06        28.86 o
   2   1   5        170.57        154.89         8.37 o
   3   1   5       1704.47       1647.92        29.53 o
   4   1   5         80.03         92.25         6.70 o
   5   1   5       3115.25       3536.51        43.96 o
   6   1   5         42.57         46.71         7.95 o
   7   1   5       3706.93       4039.67        89.89 o
   8   1   5          1.56          1.15         4.33 o
   9   1   5         10.85         13.77         4.40 o
  10   1   5          0.51         -4.41         4.41 o
  11   1   5         28.86         30.52         7.38 o
  12   1   5        108.54         78.27        24.11 o
  13   1   5         21.35         23.11        10.77 o
  14   1   5          1.24          3.30        12.19 o
  15   1   5         69.48         76.26        17.63 o
  16   1   5          3.07        -26.16        26.16 o
  17   1   5          0.38         11.16        18.59 o
  18   1   5          0.10        -12.22        20.76 o
  19   1   5          2.68          9.29        18.81 o
  20   1   5          1.15         32.34        20.21 o
 -23   2   5          0.10          3.04        35.40 o
 -22   2   5          0.01        -21.46        21.46 o
 -21   2   5          0.03         45.18        21.39 o
 -20   2   5          8.37         -2.75        21.87 o
 -19   2   5          1.09        -11.57        11.99 o
 -18   2   5         14.15          4.11        14.28 o
 -17   2   5          0.26        -14.32        14.32 o
 -16   2   5         14.22         -2.17         8.56 o
 -15   2   5         41.12         35.62         7.22 o
 -14   2   5        347.50        385.30        31.07 o
 -13   2   5         51.35         52.81         8.43 o
 -12   2   5         24.28         23.09         7.04 o
 -11   2   5          9.73         13.55         5.17 o
 -10   2   5          0.98         -3.94         5.38 o
  -9   2   5        380.06        363.91        16.28 o
  -8   2   5        123.24        105.45        14.34 o
  -7   2   5        858.78       1061.35        29.62 o
  -6   2   5        891.94        836.45        44.93 o
  -5   2   5         30.22         22.51         5.90 o
  -4   2   5        431.96        377.26        23.07 o
  -3   2   5          6.54          5.81         5.69 o
  -2   2   5       2844.30       2836.45        44.69 o
  -1   2   5       1266.97       1356.48        28.00 o
   0   2   5          0.49         -5.13         5.13 o
   1   2   5        699.49        653.16        18.90 o
   2   2   5         85.36         71.34        12.53 o
   3   2   5          5.81         -2.20         4.65 o
   4   2   5        362.51        368.51        21.45 o
   5   2   5          1.92          1.42         5.70 o
   6   2   5        120.74        145.16         9.74 o
   7   2   5         73.09         82.01         7.72 o
   8   2   5          9.46         -2.17         6.46 o
   9   2   5         27.44         28.01         6.22 o
  10   2   5         52.08         56.24         7.73 o
  11   2   5         14.80         26.99        10.58 o
  12   2   5         12.96          8.05        10.30 o
  13   2   5          2.42         -6.52         7.98 o
  14   2   5         24.35         26.09        12.38 o
  15   2   5          0.54        -15.06        15.06 o
  16   2   5          1.31        -14.27        14.27 o
  17   2   5          3.42         -6.50        14.76 o
  18   2   5          3.06        -18.04        26.11 o
  19   2   5          3.11        -13.62        20.79 o
 -22   3   5          3.12        -14.90        26.28 o
 -21   3   5          1.28          5.62        18.49 o
 -20   3   5          5.12         -7.23        20.68 o
 -19   3   5          0.75        -19.59        19.59 o
 -18   3   5         11.06         -4.18        14.86 o
 -17   3   5          7.57          3.52        16.11 o
 -16   3   5          7.49        -10.52        10.52 o
 -15   3   5         91.10        122.86        13.73 o
 -14   3   5         66.05         57.38         9.02 o
 -13   3   5          8.48         14.63         8.02 o
 -12   3   5        339.00        423.06        20.46 o
 -11   3   5         34.35         39.61         9.06 o
 -10   3   5         77.10         87.85        10.97 o
  -9   3   5        293.70        281.94        16.11 o
  -8   3   5          2.48         -6.45         7.28 o
  -7   3   5       1174.03       1338.08        93.68 o
  -6   3   5        285.71        321.01        23.24 o
  -5   3   5        367.87        316.97        20.50 o
  -4   3   5        631.17        677.11        45.67 o
  -3   3   5        954.64       1076.34        40.40 o
  -2   3   5         11.89         -7.97         7.97 o
  -1   3   5       1404.87       1589.12        51.88 o
   0   3   5         50.44         33.67         9.90 o
   1   3   5         43.57         46.52        10.02 o
   2   3   5        136.45        137.41        15.03 o
   3   3   5          0.55         -7.93         7.93 o
   4   3   5        610.96        691.58        28.44 o
   5   3   5         14.13         15.71         9.49 o
   6   3   5        136.29        132.35        16.37 o
   7   3   5         20.20         24.86         8.63 o
   8   3   5          4.12         -0.36         8.88 o
   9   3   5         44.73         28.94         9.48 o
  10   3   5         25.28          3.58        10.93 o
  11   3   5         35.23         26.73         9.34 o
  12   3   5          8.82         -6.17         9.83 o
  13   3   5          6.67         18.50        10.78 o
  14   3   5         45.18         52.94        15.82 o
  15   3   5          0.02          0.86        15.89 o
  16   3   5          6.92        -16.17        16.17 o
  17   3   5          0.03          4.55        17.56 o
  18   3   5          1.81        -19.19        19.19 o
 -20   4   5          2.37        -39.39        39.39 o
 -19   4   5          2.11          2.81        19.36 o
 -18   4   5          0.16        -15.95        25.80 o
 -17   4   5          1.74         -3.51        20.20 o
 -16   4   5         11.98          5.99        16.74 o
 -15   4   5         50.56         35.96        11.84 o
 -14   4   5         16.27          7.88        16.89 o
 -13   4   5          3.86        -10.66        10.66 o
 -12   4   5         67.07         48.97        12.44 o
 -11   4   5        122.91        160.46        21.17 o
 -10   4   5          0.05         -1.60         9.39 o
  -9   4   5         66.77         70.02        12.07 o
  -8   4   5        255.67        253.60        39.53 o
  -7   4   5         68.76         78.21        12.32 o
  -6   4   5          9.07         -0.66        10.13 o
  -5   4   5          3.31          4.18        11.85 o
  -4   4   5          0.28        -10.52        10.52 o
  -3   4   5         39.36         34.48        11.20 o
  -2   4   5         65.11         67.45        12.81 o
  -1   4   5         96.71        109.16        18.45 o
   0   4   5         35.71         54.09        14.12 o
   1   4   5         10.42          1.44        10.74 o
   2   4   5         67.83        100.43        16.20 o
   3   4   5          0.15         -6.35        10.45 o
   4   4   5          9.58          4.96        10.78 o
   5   4   5         58.71         79.68        15.60 o
   6   4   5         20.45          7.41        14.54 o
   7   4   5          0.22         -1.01        14.48 o
   8   4   5          3.36          0.35        12.02 o
   9   4   5        176.69        146.46        17.79 o
  10   4   5          7.38          2.68        12.16 o
  11   4   5          1.97         -7.88        11.91 o
  12   4   5         44.78         84.18        15.60 o
  13   4   5          0.64         -1.19        14.53 o
  14   4   5          1.85        -13.42        13.42 o
  15   4   5          0.05        -18.54        18.54 o
  16   4   5          0.03         -3.98        19.53 o
  17   4   5          0.03        -15.93        17.76 o
 -18   5   5          0.04        -19.17        19.17 o
 -17   5   5          0.11        -12.66        21.44 o
 -16   5   5          0.04        -21.39        23.13 o
 -15   5   5          1.03        -33.20        33.20 o
 -14   5   5          0.03         -0.13        18.82 o
 -13   5   5          1.32        -11.47        13.18 o
 -12   5   5          0.91        -11.73        11.73 o
 -11   5   5          0.08         -8.04        12.82 o
 -10   5   5          3.15         -6.22        12.63 o
  -9   5   5          1.66         18.02        16.11 o
  -8   5   5          0.03         -3.16         9.06 o
  -7   5   5          0.52        -11.94        11.94 o
  -6   5   5         34.87         46.21        15.14 o
  -5   5   5          0.75         -9.24         9.24 o
  -4   5   5         45.23         34.78        16.40 o
  -3   5   5         45.67         35.74        11.69 o
  -2   5   5          0.79        -11.26        12.40 o
  -1   5   5         25.47         -3.08        13.61 o
   0   5   5         32.39         28.22        12.19 o
   1   5   5        171.15        234.63        24.71 o
   2   5   5         19.74          3.03        12.18 o
   3   5   5          3.01         -4.15        14.69 o
   4   5   5        105.92         84.91        14.96 o
   5   5   5          0.07         -1.87        11.19 o
   6   5   5         21.62         21.29        11.69 o
   7   5   5         39.56         54.91        18.74 o
   8   5   5          8.00         -1.33        12.29 o
   9   5   5         20.09          5.37        11.89 o
  10   5   5          5.76        -12.57        12.57 o
  11   5   5          1.00        -13.47        13.47 o
  12   5   5          0.76        -17.14        17.14 o
  13   5   5         20.75         15.16        18.58 o
  14   5   5          3.53        -18.47        18.47 o
  15   5   5          0.22        -21.01        21.01 o
 -16   6   5          1.89         -1.43        44.73 o
 -15   6   5          1.85        -18.17        18.17 o
 -14   6   5          2.43        -48.99        48.99 o
 -13   6   5          2.47         -6.47        24.36 o
 -12   6   5          0.95        -16.12        16.12 o
 -11   6   5          0.04        -19.82        19.82 o
 -10   6   5          0.50          0.69        17.65 o
  -9   6   5          0.00         -5.34        17.09 o
  -8   6   5          7.21        -13.48        13.48 o
  -7   6   5          0.00         19.50        15.74 o
  -6   6   5          0.47        -14.91        14.91 o
  -5   6   5         35.56         48.20        19.06 o
  -4   6   5          8.75        -14.55        14.55 o
  -3   6   5         38.87         17.83        15.78 o
  -2   6   5          9.66          1.33        14.97 o
  -1   6   5         10.47         -2.76        13.40 o
   0   6   5          1.91        -12.13        12.13 o
   1   6   5          9.00          6.66        19.57 o
   2   6   5         33.17         12.71        15.24 o
   3   6   5         12.07        -13.28        13.28 o
   4   6   5         23.23         40.69        17.46 o
   5   6   5         11.62        -28.28        28.28 o
   6   6   5          0.00         -7.86        14.00 o
   7   6   5          0.18        -35.53        35.53 o
   8   6   5          7.94        -32.89        32.89 o
   9   6   5          3.07         -7.35        15.82 o
  10   6   5          0.39        -14.51        14.51 o
  11   6   5          2.24        -16.13        16.13 o
  12   6   5          3.29        -21.86        21.86 o
 -11   7   5          0.10        -21.62        21.62 o
 -10   7   5          0.38        -17.26        17.26 o
  -9   7   5          0.38        -17.61        18.69 o
  -8   7   5          2.24         10.35        16.43 o
  -7   7   5          0.07         -7.75        14.52 o
  -6   7   5          0.49        -16.85        16.85 o
  -5   7   5          0.02         -1.76        20.25 o
  -4   7   5          0.00        -16.62        19.05 o
  -3   7   5          0.02         -3.50        17.85 o
  -2   7   5          0.72        -15.15        15.15 o
  -1   7   5          6.73         17.12        16.21 o
   0   7   5          0.11        -17.89        27.95 o
   1   7   5          0.02        -11.69        15.38 o
   2   7   5          2.23         -2.22        15.12 o
   3   7   5          7.75         -3.96        17.22 o
   4   7   5         11.18         -4.66        20.74 o
   5   7   5          4.72        -13.59        17.35 o
   6   7   5          1.81        -17.03        17.03 o
   7   7   5          0.26        -16.15        16.15 o
   8   7   5          1.57         15.92        19.53 o
 -23   0   6          6.59        -35.38        35.38 o
 -22   0   6          2.68        -26.81        26.81 o
 -21   0   6          1.09        -22.13        38.57 o
 -20   0   6         15.82          4.38        53.53 o
 -19   0   6          2.15         -4.73        41.31 o
 -18   0   6          0.06         15.16        26.23 o
 -17   0   6         83.17         64.88        19.52 o
 -16   0   6         45.95         40.70        12.77 o
 -15   0   6         21.06         17.75         9.64 o
 -14   0   6          0.86          9.51        10.27 o
 -13   0   6         21.08          8.85         6.31 o
 -12   0   6       1359.62       1617.75        55.54 o
 -11   0   6        111.55        105.02         9.92 o
 -10   0   6         24.28         15.27        10.38 o
  -9   0   6        376.69        422.56        18.05 o
  -8   0   6       6598.80       7256.45       103.86 o
  -7   0   6        545.15        582.22        24.90 o
  -6   0   6       1364.74       1337.93        29.30 o
  -5   0   6        529.23        508.26        16.59 o
  -4   0   6       1738.20       1985.05        38.74 o
  -3   0   6          4.92          9.61         5.29 o
  -2   0   6       1556.80       1638.95        31.92 o
  -1   0   6      15784.20      16156.67       188.67 o
   0   0   6       1947.73       2209.19        43.10 o
   1   0   6        157.60        209.89        30.11 o
   2   0   6        827.83        810.25        24.62 o
   3   0   6       1954.11       1925.31        76.71 o
   4   0   6        582.45        661.45        76.00 o
   5   0   6        781.49        893.75        37.50 o
   6   0   6         44.41         54.43         8.54 o
   7   0   6         70.77         60.67        10.72 o
   8   0   6         15.57          6.30         7.29 o
   9   0   6        706.39        845.16        32.99 o
  10   0   6        273.63        226.22        48.82 o
  11   0   6          2.51         -3.30         8.54 o
  12   0   6        443.14        498.02       138.17 o
  13   0   6        214.76        223.43        27.56 o
  14   0   6         81.25        100.91        25.60 o
  15   0   6         15.01         46.22        21.47 o
  16   0   6          0.08        -21.01        21.01 o
  17   0   6          4.61         -1.12        21.60 o
  18   0   6          8.83        -22.25        22.25 o
  19   0   6         15.03        -28.00        29.52 o
 -23   1   6          0.34        -15.38        15.38 o
 -22   1   6          0.02        -17.88        17.88 o
 -21   1   6          1.07         12.56        24.98 o
 -20   1   6         11.03        -18.87        18.87 o
 -19   1   6          2.60          3.80        14.84 o
 -18   1   6         29.06         24.49        14.61 o
 -17   1   6          7.30         18.20        12.03 o
 -16   1   6         44.36         58.63        11.19 o
 -15   1   6         12.56         -0.71         9.59 o
 -14   1   6        217.34        181.27        11.45 o
 -13   1   6         27.11         19.72         4.83 o
 -12   1   6        425.87        500.02        16.64 o
 -11   1   6         73.54         78.08         6.26 o
 -10   1   6        629.57        669.14        16.54 o
  -9   1   6          5.31          3.73         4.47 o
  -8   1   6         12.68          5.15         4.63 o
  -7   1   6        445.53        457.39        18.17 o
  -6   1   6         99.80        109.87        14.46 o
  -5   1   6         72.87         63.54        10.74 o
  -4   1   6         43.57         38.85         4.42 o
  -3   1   6        355.58        332.87        10.44 o
  -2   1   6       1622.00       1573.89        24.11 o
  -1   1   6        735.82        726.29        18.63 o
   0   1   6       2132.17       2113.00        30.40 o
   1   1   6       1569.28       1581.64        30.28 o
   2   1   6          1.15          2.25         5.57 o
   3   1   6        174.91        169.13         9.17 o
   4   1   6       3946.63       4173.89        67.18 o
   5   1   6         32.81         34.88         7.51 o
   6   1   6          3.68          0.13         4.41 o
   7   1   6        159.32        136.60         8.55 o
   8   1   6         31.21         22.06         5.06 o
   9   1   6         45.40         32.82         5.59 o
  10   1   6         78.01         80.14         9.30 o
  11   1   6         48.20         39.43        10.04 o
  12   1   6         26.87         25.01        15.44 o
  13   1   6         87.07         91.92        24.91 o
  14   1   6          0.71         -1.64        14.88 o
  15   1   6          3.23        -13.84        13.84 o
  16   1   6         13.70         14.46        19.71 o
  17   1   6          0.27        -14.59        14.59 o
  18   1   6          4.42          4.42        15.85 o
  19   1   6          0.00         21.80        24.81 o
 -23   2   6          0.91        -16.42        30.44 o
 -22   2   6          0.05         -0.54        22.67 o
 -21   2   6          2.21        -18.60        18.93 o
 -20   2   6          0.65        -11.45        11.45 o
 -19   2   6          5.08         -1.29        16.98 o
 -18   2   6          1.85        -13.99        15.33 o
 -17   2   6         26.93         34.52        13.40 o
 -16   2   6        249.58        315.25        32.87 o
 -15   2   6          5.55        -20.73        20.73 o
 -14   2   6         11.46          7.67         6.18 o
 -13   2   6        250.08        301.20        12.82 o
 -12   2   6        563.87        618.22        19.01 o
 -11   2   6        411.01        427.04        18.28 o
 -10   2   6         99.69         94.03         7.78 o
  -9   2   6        402.59        400.31        14.60 o
  -8   2   6          1.12          4.70         5.21 o
  -7   2   6        354.35        329.39        18.76 o
  -6   2   6       1403.08       1416.39        31.87 o
  -5   2   6        128.37        108.04         8.98 o
  -4   2   6        655.86        762.22        23.21 o
  -3   2   6        717.44        685.56        22.38 o
  -2   2   6       1844.73       1913.30        44.64 o
  -1   2   6        202.34        187.05        11.17 o
   0   2   6       3333.80       3940.10        61.68 o
   1   2   6       2893.54       3236.49        53.22 o
   2   2   6        762.24        826.11        24.78 o
   3   2   6         41.49         32.87         6.78 o
   4   2   6         22.27          7.48        10.85 o
   5   2   6        126.51        135.54        11.72 o
   6   2   6        162.03        168.92        12.68 o
   7   2   6        670.10        754.88        31.27 o
   8   2   6         12.77          7.21         5.71 o
   9   2   6          4.26         -2.76         6.48 o
  10   2   6          4.57         -6.93         8.00 o
  11   2   6         79.95         55.94        14.66 o
  12   2   6          1.68          2.50         7.54 o
  13   2   6          7.29         -4.26         9.45 o
  14   2   6          0.28        -15.29        15.29 o
  15   2   6          3.70         36.36        20.28 o
  16   2   6          5.13          6.45        17.99 o
  17   2   6          0.01         10.10        16.89 o
  18   2   6          0.00          8.65        18.07 o
 -22   3   6          0.33        -19.72        19.72 o
 -21   3   6          0.02         -8.20         8.20 o
 -20   3   6          3.80          0.73        19.93 o
 -19   3   6         11.17          5.94        18.44 o
 -18   3   6          5.71        -15.54        15.54 o
 -17   3   6          2.84        -35.20        35.20 o
 -16   3   6         71.28         92.56        29.65 o
 -15   3   6         83.24        104.46        13.05 o
 -14   3   6         55.86         42.35         9.51 o
 -13   3   6         15.56         16.65         8.06 o
 -12   3   6         53.60         62.33        19.21 o
 -11   3   6         91.88         75.16         7.76 o
 -10   3   6        110.73        105.77        10.89 o
  -9   3   6         11.82          4.25         8.47 o
  -8   3   6        297.90        340.16        26.05 o
  -7   3   6          2.65         -1.43         8.21 o
  -6   3   6        993.74       1096.91        76.06 o
  -5   3   6        386.73        359.57        21.42 o
  -4   3   6         30.79         28.35        10.11 o
  -3   3   6         12.58         13.54         7.57 o
  -2   3   6       1203.14       1243.26        41.99 o
  -1   3   6        252.87        250.75        23.01 o
   0   3   6        152.83        174.19        22.26 o
   1   3   6         20.80          6.49         8.78 o
   2   3   6          4.07         -6.18         8.71 o
   3   3   6        320.93        429.10        39.68 o
   4   3   6         36.07         23.13         7.58 o
   5   3   6        151.90        200.46        14.83 o
   6   3   6         13.15          6.82         7.90 o
   7   3   6        153.21        149.99        14.61 o
   8   3   6          0.43         -0.46         8.30 o
   9   3   6         11.70         -2.40         8.95 o
  10   3   6         74.83         66.61        12.23 o
  11   3   6          5.18         -8.61         9.35 o
  12   3   6          4.50          4.51        11.20 o
  13   3   6         31.59         13.69        13.29 o
  14   3   6          0.68          1.95        13.05 o
  15   3   6          0.24         -3.39        19.53 o
  16   3   6          0.56        -18.72        18.72 o
  17   3   6          1.17         -2.41         2.41 o
  18   3   6          0.06        -24.55        24.55 o
 -20   4   6          0.45        -18.99        18.99 o
 -19   4   6          0.53        -21.06        21.06 o
 -18   4   6          0.00        -22.22        22.22 o
 -17   4   6          0.03        -12.46        12.46 o
 -16   4   6          3.36          8.37        11.57 o
 -15   4   6          1.88         -4.10         9.39 o
 -14   4   6         47.13         61.72        12.87 o
 -13   4   6         32.68         18.40        13.31 o
 -12   4   6          5.34         13.27        12.16 o
 -11   4   6          0.00         -5.93         8.29 o
 -10   4   6          1.17          0.71        13.81 o
  -9   4   6         27.19         20.77        12.01 o
  -8   4   6          3.94          5.22         9.09 o
  -7   4   6         19.31          6.81        15.38 o
  -6   4   6          9.83         -2.26        12.54 o
  -5   4   6          3.39         -6.49        13.13 o
  -4   4   6        199.62        192.46        28.64 o
  -3   4   6         69.29         61.91        14.88 o
  -2   4   6         22.57         38.47        13.97 o
  -1   4   6         26.64         -7.85        13.84 o
   0   4   6         24.56         17.06        11.61 o
   1   4   6        183.08        241.06        24.71 o
   2   4   6         15.03         11.13        11.41 o
   3   4   6          7.82        -10.53        10.53 o
   4   4   6        304.24        370.99        39.68 o
   5   4   6        147.01        157.27        16.28 o
   6   4   6        120.69        128.91        16.95 o
   7   4   6         88.21         74.35        15.86 o
   8   4   6          0.33        -11.24        11.24 o
   9   4   6          6.50         -3.57        13.18 o
  10   4   6          3.09         -3.93        11.40 o
  11   4   6          3.54        -10.81        10.81 o
  12   4   6          2.82        -15.11        15.11 o
  13   4   6          5.30        -14.66        14.66 o
  14   4   6         11.48         40.03        18.36 o
  15   4   6          0.49        -25.18        25.18 o
  16   4   6          0.21        -13.36        21.44 o
 -18   5   6          0.12        -20.68        20.68 o
 -17   5   6          0.01        -37.75        37.75 o
 -16   5   6          0.09        -17.68        17.68 o
 -15   5   6         10.80         28.17        14.69 o
 -14   5   6         17.04         47.30        16.39 o
 -13   5   6          0.09        -20.83        20.83 o
 -12   5   6          1.49        -13.36        13.36 o
 -11   5   6          1.53        -13.26        13.26 o
 -10   5   6          6.12          2.92        11.63 o
  -9   5   6          1.73         -9.12        12.29 o
  -8   5   6          0.43        -21.45        21.45 o
  -7   5   6         57.96         49.83        13.65 o
  -6   5   6        138.21        150.94        23.53 o
  -5   5   6          2.33         -5.08        13.49 o
  -4   5   6        158.49        182.43        24.57 o
  -3   5   6          0.00        -12.74        14.20 o
  -2   5   6          0.38        -14.87        16.65 o
  -1   5   6         63.45         72.89        16.71 o
   0   5   6         22.86         40.22        14.28 o
   1   5   6         19.15         19.55        15.29 o
   2   5   6          1.05        -10.43        10.43 o
   3   5   6         19.64          4.39        19.32 o
   4   5   6          4.22          2.99        11.41 o
   5   5   6         48.06         14.54        31.17 o
   6   5   6          0.51        -12.00        12.00 o
   7   5   6         15.41         17.53        14.12 o
   8   5   6         14.52          7.86        15.75 o
   9   5   6          0.06         -9.47        16.78 o
  10   5   6          7.73         -9.64        15.66 o
  11   5   6          0.22         -5.79         5.79 o
  12   5   6          0.06        -11.91        17.26 o
  13   5   6          0.02        -20.87        20.87 o
  14   5   6          0.29          8.15        17.63 o
 -15   6   6          4.73         18.47        25.53 o
 -14   6   6          0.82        -14.36        22.18 o
 -13   6   6          1.90         -5.09        19.83 o
 -12   6   6          0.11        -13.40        20.41 o
 -11   6   6          0.04         -6.87        16.44 o
 -10   6   6          0.00         -8.31        26.23 o
  -9   6   6          1.21         -7.02        26.56 o
  -8   6   6          1.20        -15.00        15.00 o
  -7   6   6          5.76         10.51        15.24 o
  -6   6   6          0.57        -14.89        14.89 o
  -5   6   6         30.93          8.70        15.90 o
  -4   6   6          1.59         -0.12        15.86 o
  -3   6   6          7.35        -14.17        14.17 o
  -2   6   6         34.35         46.78        18.76 o
  -1   6   6          6.52         -1.36        14.03 o
   0   6   6         17.45          1.28        13.72 o
   1   6   6         41.70         36.21        15.18 o
   2   6   6          4.69         16.93        13.38 o
   3   6   6          1.43          5.31        15.20 o
   4   6   6          2.41        -13.47        13.47 o
   5   6   6          0.38         -0.55        13.18 o
   6   6   6          2.45         12.11        13.76 o
   7   6   6          3.65         -0.47        18.74 o
   8   6   6          0.61          3.82        14.41 o
   9   6   6          5.45        -30.88        30.88 o
  10   6   6          6.51          7.06        24.89 o
  11   6   6          3.54        -23.89        23.89 o
 -11   7   6          1.30         -7.40         7.40 o
 -10   7   6          0.03         -4.86        27.69 o
  -9   7   6          0.30        -18.65        18.65 o
  -8   7   6          0.12        -19.52        19.52 o
  -7   7   6          3.35        -18.02        18.02 o
  -6   7   6          0.19        -15.70        15.70 o
  -5   7   6          2.30        -19.78        19.78 o
  -4   7   6          0.51        -15.94        15.94 o
  -3   7   6          0.10         -0.20        16.55 o
  -2   7   6          0.44        -11.90        20.65 o
  -1   7   6          1.87         -5.74         5.74 o
   0   7   6          0.31        -20.70        20.70 o
   1   7   6          0.18         -8.02        15.81 o
   2   7   6          0.22         -9.52        14.87 o
   3   7   6          0.41        -15.68        32.08 o
   4   7   6          2.78          8.28        17.01 o
   5   7   6          0.63         -3.73        17.41 o
   6   7   6          0.75        -15.92        15.92 o
   7   7   6          0.64          6.08        19.47 o
 -23   1   7          1.70          5.60        27.64 o
 -22   1   7          2.43        -31.06        31.06 o
 -21   1   7          0.22        -17.56        17.56 o
 -20   1   7          6.13        -15.45        15.45 o
 -19   1   7         22.51         24.62        19.59 o
 -18   1   7          0.04         -5.54        13.96 o
 -17   1   7         65.43         49.56        14.37 o
 -16   1   7        416.21        496.78        28.78 o
 -15   1   7        167.90        200.65        19.38 o
 -14   1   7          0.07          3.95         5.77 o
 -13   1   7        106.37         81.71         8.60 o
 -12   1   7        574.95        592.99        19.04 o
 -11   1   7          7.43          2.78         5.50 o
 -10   1   7        590.23        618.71        19.02 o
  -9   1   7        177.23        161.79         9.71 o
  -8   1   7        124.53        136.98         9.17 o
  -7   1   7          4.34          5.94         5.59 o
  -6   1   7         12.41          7.89         4.75 o
  -5   1   7          1.04         -0.33         3.69 o
  -4   1   7       1193.95       1153.13        22.90 o
  -3   1   7        195.72        184.69        12.70 o
  -2   1   7        945.78        982.62        19.95 o
  -1   1   7        202.50        221.07         9.52 o
   0   1   7       3653.66       3784.67        58.97 o
   1   1   7        498.12        611.03        19.18 o
   2   1   7         32.98         46.08         5.92 o
   3   1   7        313.31        270.96        11.40 o
   4   1   7        162.82        208.03         9.92 o
   5   1   7         22.90         20.69         4.30 o
   6   1   7         12.66         19.88         6.91 o
   7   1   7        476.30        467.57        24.76 o
   8   1   7        589.96        613.73        50.42 o
   9   1   7        141.53        159.15        11.22 o
  10   1   7         81.28         88.87        11.29 o
  11   1   7          3.13         -2.68         6.42 o
  12   1   7        140.91        115.68        23.72 o
  13   1   7         41.58         70.36        14.48 o
  14   1   7         13.43        -15.16        15.16 o
  15   1   7          0.81          4.22        19.14 o
  16   1   7          0.31         -4.87        18.03 o
  17   1   7          5.27        -18.29        18.29 o
  18   1   7          0.00        -17.34        17.34 o
 -23   2   7          0.69        -29.34        29.34 o
 -22   2   7          1.23        -17.44        17.44 o
 -21   2   7          0.24        -36.59        36.59 o
 -20   2   7         11.04          0.17        18.68 o
 -19   2   7         22.14         26.24        21.89 o
 -18   2   7         12.29          6.61        16.81 o
 -17   2   7         19.54         14.08        11.91 o
 -16   2   7         11.99         21.51         9.05 o
 -15   2   7          0.02         -3.93         5.70 o
 -14   2   7          3.43          1.97         6.17 o
 -13   2   7        176.48        180.18        12.49 o
 -12   2   7         14.87         18.54         6.48 o
 -11   2   7          1.58         13.16         6.12 o
 -10   2   7         40.94         27.94         7.54 o
  -9   2   7         37.41         25.09         7.20 o
  -8   2   7         51.20         53.45        11.04 o
  -7   2   7        612.57        642.74        27.11 o
  -6   2   7        594.83        665.41        22.11 o
  -5   2   7         33.24         35.69         8.15 o
  -4   2   7       1926.09       2042.18        78.55 o
  -3   2   7          2.72          2.22         6.56 o
  -2   2   7         69.31         52.82         7.74 o
  -1   2   7        179.81        166.37        12.18 o
   0   2   7        956.06       1056.35        31.35 o
   1   2   7        257.57        246.97        27.14 o
   2   2   7        873.70        944.70        29.71 o
   3   2   7        350.31        374.26        29.47 o
   4   2   7        322.06        308.48        29.66 o
   5   2   7        155.83        149.54        13.51 o
   6   2   7        104.94        103.14        10.19 o
   7   2   7        109.67         86.59         9.59 o
   8   2   7         87.46        105.43         9.88 o
   9   2   7          2.66         -1.66         6.10 o
  10   2   7          0.14          1.45         7.83 o
  11   2   7         80.29        142.88        25.31 o
  12   2   7         23.20         21.56        14.06 o
  13   2   7         19.91         40.26        18.47 o
  14   2   7          7.99         -1.00        14.44 o
  15   2   7          0.19        -19.42        19.42 o
  16   2   7          0.24        -17.84        17.84 o
  17   2   7          1.13        -10.73        28.00 o
  18   2   7          0.48         -7.99        31.50 o
 -22   3   7          2.54        -10.75        10.75 o
 -21   3   7          1.81        -21.31        21.31 o
 -20   3   7          1.21        -18.93        18.93 o
 -19   3   7         14.61         13.85        17.44 o
 -18   3   7          0.36         14.65        17.03 o
 -17   3   7          0.01          7.83        12.66 o
 -16   3   7          0.06        -11.69        11.69 o
 -15   3   7          9.88         10.56        11.22 o
 -14   3   7         56.02         59.37        11.79 o
 -13   3   7         57.86         92.34        11.20 o
 -12   3   7         19.93         11.72        10.54 o
 -11   3   7          1.85         -7.63         7.63 o
 -10   3   7          2.78          3.02         6.94 o
  -9   3   7         61.00         51.00         9.91 o
  -8   3   7         26.65          4.68        11.64 o
  -7   3   7         10.65         14.70         9.75 o
  -6   3   7        137.22        183.63        14.11 o
  -5   3   7        226.89        203.71        15.82 o
  -4   3   7          0.22         -7.66         7.66 o
  -3   3   7          2.22          7.93        11.00 o
  -2   3   7         17.75         14.96         9.56 o
  -1   3   7        309.75        368.30        42.16 o
   0   3   7        541.71        597.52        34.06 o
   1   3   7          0.06         -4.65         8.80 o
   2   3   7          0.01         -1.82         7.43 o
   3   3   7         41.35         25.92        11.79 o
   4   3   7        464.25        504.20        21.54 o
   5   3   7          0.24         -6.42         8.60 o
   6   3   7          3.32         -5.22         8.33 o
   7   3   7         39.83         44.47        10.65 o
   8   3   7        174.62        187.17        33.70 o
   9   3   7         47.69         52.70        12.35 o
  10   3   7         33.91         44.30        17.22 o
  11   3   7          9.33         19.19        10.25 o
  12   3   7         24.31         37.03        13.26 o
  13   3   7         28.86         32.28        12.36 o
  14   3   7          7.85         15.29        17.75 o
  15   3   7          5.51        -21.38        21.38 o
  16   3   7          0.87        -17.09        17.09 o
  17   3   7          2.23        -23.74        23.74 o
 -20   4   7          5.25         13.31        18.03 o
 -19   4   7          3.91        -18.23        19.00 o
 -18   4   7          0.93         -3.21        21.44 o
 -17   4   7          3.89          8.54        14.55 o
 -16   4   7          6.91        -36.08        36.08 o
 -15   4   7         10.39        -12.15        12.15 o
 -14   4   7         26.39         12.21        10.49 o
 -13   4   7         13.41          3.82        10.39 o
 -12   4   7         69.83         51.85        17.63 o
 -11   4   7         22.81          6.19        12.12 o
 -10   4   7          0.78        -13.20        13.20 o
  -9   4   7          0.00         -1.29        12.04 o
  -8   4   7         77.80         79.52        15.24 o
  -7   4   7         95.93        108.35        19.81 o
  -6   4   7          8.48         -6.76        10.78 o
  -5   4   7         86.34         91.22        15.54 o
  -4   4   7          3.56          0.54        13.68 o
  -3   4   7         10.57          3.63        12.00 o
  -2   4   7        470.81        631.25        43.02 o
  -1   4   7         31.44         16.56        12.83 o
   0   4   7        103.18        110.80        17.40 o
   1   4   7          0.53        -12.00        12.00 o
   2   4   7        120.48        162.03        18.40 o
   3   4   7        158.24        152.11        16.21 o
   4   4   7         59.26         75.81        11.85 o
   5   4   7         36.18         27.71        13.91 o
   6   4   7          1.86         -9.05         9.05 o
   7   4   7          1.38        -10.37        10.37 o
   8   4   7         74.42         76.73        17.26 o
   9   4   7          5.29         -8.38        11.03 o
  10   4   7         14.51          4.28        12.27 o
  11   4   7          0.56         -7.99        15.28 o
  12   4   7          2.62          0.07        13.48 o
  13   4   7          1.26        -17.29        17.29 o
  14   4   7          0.12        -22.24        24.95 o
  15   4   7          0.29          1.24        23.56 o
 -18   5   7          0.04         16.24        33.61 o
 -17   5   7          0.07         31.23        21.87 o
 -16   5   7          2.32        -15.87        15.87 o
 -15   5   7          0.85        -15.82        15.82 o
 -14   5   7          0.03         -8.73        13.34 o
 -13   5   7          6.47        -12.69        12.69 o
 -12   5   7          3.08         -6.60        13.27 o
 -11   5   7         62.10         55.00        21.76 o
 -10   5   7         13.00        -13.08        13.08 o
  -9   5   7         12.15         -9.62        13.35 o
  -8   5   7          1.93         10.03        23.25 o
  -7   5   7         91.25        143.51        22.41 o
  -6   5   7          0.47        -13.34        14.09 o
  -5   5   7          6.97        -13.33        13.33 o
  -4   5   7         74.76        103.27        19.14 o
  -3   5   7          7.64         -3.94        13.79 o
  -2   5   7          2.78         -2.81        15.87 o
  -1   5   7          0.07         -7.28        14.28 o
   0   5   7         39.31         30.18        17.93 o
   1   5   7         14.65          7.57        16.77 o
   2   5   7         51.97         35.63        12.87 o
   3   5   7         38.03         46.64        16.03 o
   4   5   7          3.79         -7.88        11.87 o
   5   5   7          7.04         22.31        20.39 o
   6   5   7         14.84         27.03        14.16 o
   7   5   7         15.04        -11.23        13.18 o
   8   5   7          0.14        -10.50        14.22 o
   9   5   7         37.20         23.79        16.66 o
  10   5   7          0.42        -14.43        14.43 o
  11   5   7          0.18        -15.41        15.41 o
  12   5   7          0.32        -19.03        19.03 o
  13   5   7          2.21         -8.64        17.88 o
 -15   6   7          0.88        -24.88        24.88 o
 -14   6   7          8.38          2.49        21.98 o
 -13   6   7          0.06        -17.13        17.13 o
 -12   6   7         10.39         17.76        15.76 o
 -11   6   7          7.58        -18.15        18.15 o
 -10   6   7          0.49        -19.33        19.33 o
  -9   6   7         10.89         -8.23        15.78 o
  -8   6   7          2.09        -11.27        16.69 o
  -7   6   7          1.13        -14.50        14.50 o
  -6   6   7          2.73        -26.63        26.63 o
  -5   6   7          9.99         15.47        18.77 o
  -4   6   7          7.79        -14.60        14.60 o
  -3   6   7          0.00        -12.92        12.92 o
  -2   6   7          0.21         -2.68        13.01 o
  -1   6   7          0.14         -6.06        14.62 o
   0   6   7          0.07        -13.67        13.67 o
   1   6   7         10.17         16.93        14.62 o
   2   6   7          2.97        -11.80        13.40 o
   3   6   7          1.72        -13.57        13.57 o
   4   6   7          0.37          3.53        14.05 o
   5   6   7          2.17        -14.11        14.11 o
   6   6   7          0.36         -5.89        15.23 o
   7   6   7          4.86        -15.26        15.26 o
   8   6   7          2.73         -3.47        16.59 o
   9   6   7          0.86        -12.45        15.01 o
  10   6   7          1.34         -5.10        21.76 o
 -10   7   7          0.36         -3.63        18.08 o
  -9   7   7          1.00          6.32        23.57 o
  -8   7   7          0.03        -18.81        18.81 o
  -7   7   7          0.17        -19.50        25.81 o
  -6   7   7          6.76        -18.85        18.85 o
  -5   7   7          2.67         -1.57        17.89 o
  -4   7   7          4.20        -16.77        16.77 o
  -3   7   7          0.19        -18.31        18.31 o
  -2   7   7          2.03        -16.42        16.42 o
  -1   7   7          4.92         -1.69        14.39 o
   0   7   7          2.30         12.78        16.51 o
   1   7   7          0.09        -15.56        15.56 o
   2   7   7          7.82         12.34        16.82 o
   3   7   7          0.19        -17.59        17.59 o
   4   7   7          7.28        -16.71        16.71 o
   5   7   7          0.33        -30.09        30.09 o
   6   7   7          0.10        -14.98        20.33 o
 -23   0   8          0.06        -30.18        30.18 o
 -22   0   8          0.04        -26.87        48.95 o
 -21   0   8          1.94        -60.33        60.33 o
 -20   0   8         13.93         29.39        31.98 o
 -19   0   8         23.53         27.38        21.98 o
 -18   0   8          0.56        -13.61        32.29 o
 -17   0   8         67.85         38.06        21.70 o
 -16   0   8         92.49         96.42        29.71 o
 -15   0   8         88.93         71.02        18.77 o
 -14   0   8         23.91         21.37         8.20 o
 -13   0   8         43.54         45.81         9.65 o
 -12   0   8         43.88         43.58        12.73 o
 -11   0   8          2.24          0.88        14.49 o
 -10   0   8         24.63         16.04         7.72 o
  -9   0   8          2.99         -2.85         5.53 o
  -8   0   8        162.87        185.09        22.73 o
  -7   0   8       3149.57       3291.95        60.74 o
  -6   0   8       3304.64       3300.06        62.69 o
  -5   0   8          9.65         12.34         6.25 o
  -4   0   8        818.94        818.42        28.68 o
  -3   0   8         79.36         52.10        17.45 o
  -2   0   8        786.07        772.14        57.88 o
  -1   0   8        437.81        403.29        48.58 o
   0   0   8       3995.62       4201.86       143.97 o
   1   0   8       3101.70       3373.56       150.26 o
   2   0   8       2076.17       2262.37        66.99 o
   3   0   8        531.41        488.64        48.26 o
   4   0   8        600.35        685.15        41.61 o
   5   0   8       1594.90       1795.32        62.26 o
   6   0   8        174.30        176.21        23.51 o
   7   0   8        343.58        357.69        22.26 o
   8   0   8        460.54        554.35        30.38 o
   9   0   8        611.91        707.73        72.05 o
  10   0   8         39.83         40.58        12.66 o
  11   0   8          3.23        -11.83        17.38 o
  12   0   8         13.32        -13.33        13.33 o
  13   0   8         84.59         76.38        35.06 o
  14   0   8         24.79        -19.05        21.26 o
  15   0   8         11.81         -0.88        19.99 o
  16   0   8          4.34        -22.06        32.12 o
  17   0   8         10.33         19.37        26.93 o
  18   0   8          0.62        -18.62        44.50 o
 -23   1   8          0.74         -6.25        36.97 o
 -22   1   8          1.14        -39.83        39.83 o
 -21   1   8          0.05        -17.80        17.80 o
 -20   1   8          0.41        -13.23        17.61 o
 -19   1   8          0.09        -14.73        14.73 o
 -18   1   8          0.01        -12.21        12.21 o
 -17   1   8         12.96          4.68        12.68 o
 -16   1   8         33.02         25.57        10.43 o
 -15   1   8         93.50         96.94        10.32 o
 -14   1   8         85.08         82.31        10.95 o
 -13   1   8         60.85         40.83         7.81 o
 -12   1   8        303.51        357.36        20.82 o
 -11   1   8        121.53        117.24        11.61 o
 -10   1   8         33.99         54.15        11.05 o
  -9   1   8         46.44         60.29         7.47 o
  -8   1   8         96.36         68.34         9.30 o
  -7   1   8         83.67        109.40        15.77 o
  -6   1   8       1089.73       1226.20        25.99 o
  -5   1   8        874.62        853.83        21.19 o
  -4   1   8         36.38         25.27         5.62 o
  -3   1   8        276.83        286.37        11.91 o
  -2   1   8        201.16        195.55        15.86 o
  -1   1   8        225.98        200.17        10.64 o
   0   1   8         80.84         97.92         8.84 o
   1   1   8          7.78          9.18         5.73 o
   2   1   8         75.16         60.29         7.54 o
   3   1   8          1.93         -5.09         5.45 o
   4   1   8        168.04        152.38        12.59 o
   5   1   8        141.74        153.55        21.26 o
   6   1   8        170.54        209.19        11.51 o
   7   1   8        108.62         96.40         7.91 o
   8   1   8         81.39         70.54        15.76 o
   9   1   8         42.53         43.63        17.38 o
  10   1   8          0.14        -11.63        11.63 o
  11   1   8          0.17         -8.09         8.09 o
  12   1   8        101.90        117.10        21.59 o
  13   1   8          0.24        -11.47        11.47 o
  14   1   8          1.37        -14.82        14.82 o
  15   1   8          8.27        -18.81        29.96 o
  16   1   8          1.72          8.15        29.48 o
  17   1   8          0.15        -19.84        19.84 o
  18   1   8          0.03        -21.74        21.74 o
 -23   2   8          1.83        -30.69        30.69 o
 -22   2   8          4.26        -19.82        19.82 o
 -21   2   8          0.13        -25.03        25.03 o
 -20   2   8          0.16        -17.86        17.86 o
 -19   2   8         24.20        -45.22        55.78 o
 -18   2   8          0.49        -13.58        13.58 o
 -17   2   8          0.84        -11.62        11.62 o
 -16   2   8         35.97         33.13        16.81 o
 -15   2   8        382.99        421.54        38.49 o
 -14   2   8        191.83        209.19        13.31 o
 -13   2   8          7.13         23.14         9.23 o
 -12   2   8          7.77         -0.17         8.28 o
 -11   2   8        344.29        412.41        21.48 o
 -10   2   8         15.51         10.64         9.18 o
  -9   2   8          1.06         -5.96         5.96 o
  -8   2   8       1089.22       1110.70        36.29 o
  -7   2   8        181.52        191.70        15.87 o
  -6   2   8          0.42         -5.82         6.10 o
  -5   2   8         33.78         21.96         6.71 o
  -4   2   8         11.51         19.01         7.06 o
  -3   2   8         49.35         48.38         8.59 o
  -2   2   8          6.19         15.81        12.64 o
  -1   2   8        281.70        268.57        16.22 o
   0   2   8        100.04        133.10        18.57 o
   1   2   8          2.26         -2.10         6.79 o
   2   2   8        124.23        119.71        16.65 o
   3   2   8         12.96          9.50         8.03 o
   4   2   8        228.30        251.72        17.03 o
   5   2   8          4.47         -7.94         7.94 o
   6   2   8         16.10         28.74         8.94 o
   7   2   8          5.59         -7.39         7.39 o
   8   2   8          0.34         -6.42         8.88 o
   9   2   8        414.57        444.98        28.46 o
  10   2   8        280.21        349.37        25.76 o
  11   2   8         49.50         59.64        11.92 o
  12   2   8          3.76        -11.22        11.31 o
  13   2   8          0.83        -12.53        12.53 o
  14   2   8          2.05        -14.95        14.95 o
  15   2   8          0.60        -19.47        19.47 o
  16   2   8          0.36         -2.72        19.67 o
  17   2   8          0.92         -4.31        18.24 o
 -22   3   8          1.22        -16.11        22.03 o
 -21   3   8          2.33        -14.23        14.23 o
 -20   3   8          1.84        -17.43        17.43 o
 -19   3   8          6.26         16.56        16.82 o
 -18   3   8         15.06         20.05        22.59 o
 -17   3   8          9.21         -3.45        14.49 o
 -16   3   8          6.98        -23.09        23.09 o
 -15   3   8         49.18         55.30        11.66 o
 -14   3   8         74.88         73.39        13.90 o
 -13   3   8          6.40          4.75         8.55 o
 -12   3   8          1.18         -7.16         8.13 o
 -11   3   8        201.68        202.68        16.46 o
 -10   3   8         32.68         37.51         9.44 o
  -9   3   8         85.13         75.33         9.74 o
  -8   3   8          2.27          2.45         5.94 o
  -7   3   8        722.60        873.15        36.96 o
  -6   3   8         90.80        107.35        11.31 o
  -5   3   8          4.47          1.03         7.77 o
  -4   3   8          0.17         -1.40         7.50 o
  -3   3   8         64.29         55.44        10.24 o
  -2   3   8        105.37         82.82        12.53 o
  -1   3   8         13.59         16.10         9.93 o
   0   3   8        285.14        337.87        21.99 o
   1   3   8       1291.19       1462.12        50.84 o
   2   3   8          1.01         -9.42         9.42 o
   3   3   8        122.54        115.66        13.51 o
   4   3   8          4.47          1.45         8.77 o
   5   3   8        243.79        308.37        21.97 o
   6   3   8         28.98         42.87        10.48 o
   7   3   8          4.17         25.85        11.18 o
   8   3   8        106.35         97.30        14.34 o
   9   3   8        187.10        221.72        30.98 o
  10   3   8         34.46         35.70        13.96 o
  11   3   8         37.93         28.48        13.60 o
  12   3   8          1.03          9.03        17.33 o
  13   3   8          3.15         -8.98        17.49 o
  14   3   8          1.62        -14.49        14.49 o
  15   3   8          1.00        -17.20        17.20 o
  16   3   8          0.35        -16.78        16.80 o
 -20   4   8          0.08        -18.91        18.91 o
 -19   4   8          0.13         -5.40        27.07 o
 -18   4   8          1.31        -11.75        17.65 o
 -17   4   8          0.41        -23.60        23.60 o
 -16   4   8          0.02         23.53        13.07 o
 -15   4   8         19.38          8.50        13.04 o
 -14   4   8         14.26         -4.28        10.60 o
 -13   4   8          0.29        -13.02        13.02 o
 -12   4   8          0.02         -3.09        10.07 o
 -11   4   8         72.02         93.86        17.82 o
 -10   4   8         64.22         49.63        11.72 o
  -9   4   8         38.71         27.12        10.90 o
  -8   4   8         11.19          4.48         9.58 o
  -7   4   8         52.42         32.85        12.19 o
  -6   4   8         10.62         -5.89        11.08 o
  -5   4   8         94.60         95.63        21.95 o
  -4   4   8          0.44        -11.75        11.75 o
  -3   4   8         45.54         27.71        13.34 o
  -2   4   8         40.61         21.44        14.17 o
  -1   4   8          8.96         13.51        11.49 o
   0   4   8        262.07        284.36        22.13 o
   1   4   8         98.04        113.05        25.33 o
   2   4   8        333.42        417.31        26.13 o
   3   4   8        107.95         98.13        14.20 o
   4   4   8         46.35         44.51        13.22 o
   5   4   8          7.60          4.92         9.97 o
   6   4   8          0.04          6.12        11.79 o
   7   4   8         30.46          3.70        13.48 o
   8   4   8          7.55         16.05        11.19 o
   9   4   8          3.39          2.14        11.46 o
  10   4   8          0.50          5.62        14.23 o
  11   4   8          0.38        -13.58        13.58 o
  12   4   8          0.76        -16.04        16.04 o
  13   4   8          1.35        -19.07        19.07 o
  14   4   8          0.00        -18.62        18.62 o
 -18   5   8          0.66        -22.80        22.80 o
 -17   5   8          1.25        -16.76        16.76 o
 -16   5   8          0.16         15.54        21.09 o
 -15   5   8          0.55        -13.65        13.65 o
 -14   5   8         13.42        -25.97        25.97 o
 -13   5   8         11.92         18.26        13.13 o
 -12   5   8          4.83         -8.48        13.72 o
 -11   5   8          0.39        -13.44        13.44 o
 -10   5   8          1.01        -14.18        14.18 o
  -9   5   8          0.20        -13.91        13.91 o
  -8   5   8          4.24         -4.79        13.07 o
  -7   5   8          5.29        -13.21        13.21 o
  -6   5   8         15.46         -0.91        14.41 o
  -5   5   8         16.02          6.47        15.33 o
  -4   5   8         67.73         90.36        18.07 o
  -3   5   8         68.48         69.41        18.73 o
  -2   5   8          1.40        -14.61        15.04 o
  -1   5   8         37.73         23.05        14.32 o
   0   5   8         30.26         37.15        14.22 o
   1   5   8         11.86        -26.10        26.10 o
   2   5   8          5.59        -13.17        13.17 o
   3   5   8          0.10        -10.12        10.12 o
   4   5   8         45.52         48.71        15.21 o
   5   5   8          3.17        -15.57        15.57 o
   6   5   8          9.32         12.09        14.17 o
   7   5   8          2.45        -12.26        12.26 o
   8   5   8         26.58          4.84        16.85 o
   9   5   8          7.35          1.68        19.09 o
  10   5   8          3.80         -9.37        16.96 o
  11   5   8          5.60        -32.30        32.30 o
  12   5   8          3.54        -11.08        11.08 o
 -15   6   8          0.79        -21.68        21.68 o
 -14   6   8          0.93          6.88        19.19 o
 -13   6   8          1.64        -17.33        17.33 o
 -12   6   8          7.35        -21.22        21.22 o
 -11   6   8          0.71         -6.50        16.28 o
 -10   6   8          1.76          8.50        16.62 o
  -9   6   8          1.77        -16.07        16.07 o
  -8   6   8          0.94        -17.17        17.17 o
  -7   6   8          4.55          5.57        18.18 o
  -6   6   8         14.34         23.08        21.52 o
  -5   6   8          0.16         -7.70         7.70 o
  -4   6   8          5.63          5.96        15.53 o
  -3   6   8          0.05        -15.72        15.72 o
  -2   6   8          0.48        -21.48        21.48 o
  -1   6   8          0.12        -29.41        29.41 o
   0   6   8          0.06         -4.94        13.64 o
   1   6   8          3.60        -10.13        15.15 o
   2   6   8          0.00          2.02        14.81 o
   3   6   8          0.08        -14.13        14.13 o
   4   6   8          0.05          3.92        13.83 o
   5   6   8          3.59        -15.58        16.97 o
   6   6   8          0.62        -16.00        16.00 o
   7   6   8          3.08        -15.98        15.98 o
   8   6   8          0.14         -0.24        15.94 o
   9   6   8          0.02        -19.30        19.30 o
 -10   7   8          2.37        -14.03        20.28 o
  -9   7   8          0.18        -20.28        20.28 o
  -8   7   8          2.40        -16.52        16.52 o
  -7   7   8          2.11        -17.68        17.68 o
  -6   7   8          4.37        -18.43        18.43 o
  -5   7   8          0.50        -19.25        19.25 o
  -4   7   8          2.01        -18.75        25.14 o
  -3   7   8          0.33        -17.24        17.24 o
  -2   7   8          0.00          7.60        18.29 o
  -1   7   8          0.04        -17.80        17.80 o
   0   7   8          0.88        -14.57        14.57 o
   1   7   8          4.54        -16.61        16.61 o
   2   7   8          2.17        -12.62        12.62 o
   3   7   8         12.62         -1.28        22.95 o
   4   7   8          0.02        -10.38        18.20 o
 -23   1   9          0.25        -30.13        35.62 o
 -22   1   9          0.46         13.27        21.23 o
 -21   1   9         13.62        -50.05        50.05 o
 -20   1   9          4.12        -19.66        19.66 o
 -19   1   9         11.56         17.16        17.81 o
 -18   1   9          0.35        -22.55        22.55 o
 -17   1   9         27.16         40.46        14.83 o
 -16   1   9         59.11         46.76        10.04 o
 -15   1   9        291.68        323.30        31.41 o
 -14   1   9         37.45         35.96        14.42 o
 -13   1   9          6.06         -7.84         7.84 o
 -12   1   9         14.71          2.37         5.30 o
 -11   1   9         63.99         53.65         7.88 o
 -10   1   9          0.01         -1.27         6.36 o
  -9   1   9          2.95         -2.77         6.66 o
  -8   1   9        365.52        345.12        19.06 o
  -7   1   9        182.83        206.66        11.18 o
  -6   1   9        169.31        158.21        12.31 o
  -5   1   9        176.57        201.00        11.21 o
  -4   1   9        325.14        334.41        16.95 o
  -3   1   9       1388.75       1560.98        32.13 o
  -2   1   9        356.02        318.38        16.19 o
  -1   1   9        302.91        354.03        22.80 o
   0   1   9         31.75         29.81         7.53 o
   1   1   9        497.69        528.79        20.63 o
   2   1   9        186.78        161.18        11.11 o
   3   1   9        352.35        327.94        14.31 o
   4   1   9        146.13        158.47        10.26 o
   5   1   9        993.38       1051.89        61.84 o
   6   1   9        102.27        128.48        14.99 o
   7   1   9         40.40         23.59         9.45 o
   8   1   9         39.44         22.45        13.76 o
   9   1   9         29.30         35.43         7.86 o
  10   1   9        102.06         73.81        11.78 o
  11   1   9          6.05          2.49         8.95 o
  12   1   9         14.17         11.02        18.48 o
  13   1   9          8.05         41.15        18.89 o
  14   1   9          0.59        -15.61        15.61 o
  15   1   9          7.97         -8.14        25.46 o
  16   1   9          0.10         10.51        31.27 o
  17   1   9          0.19         12.94        21.28 o
 -22   2   9          1.71        -37.39        37.39 o
 -21   2   9          2.34         23.05        22.16 o
 -20   2   9          0.62        -17.60        17.60 o
 -19   2   9          8.59         31.42        18.78 o
 -18   2   9         10.96          6.86        15.23 o
 -17   2   9         25.69         29.54        12.76 o
 -16   2   9          0.01        -19.07        19.07 o
 -15   2   9        131.14        126.14        19.69 o
 -14   2   9          4.77          0.05        12.48 o
 -13   2   9         15.34         21.07         8.43 o
 -12   2   9          9.22         -3.05         8.69 o
 -11   2   9        391.37        469.64        54.53 o
 -10   2   9         25.26         38.87        10.91 o
  -9   2   9        370.81        363.81        25.49 o
  -8   2   9          2.37         -8.34         8.34 o
  -7   2   9         92.12        114.57        11.98 o
  -6   2   9        280.68        235.01        14.34 o
  -5   2   9        379.59        385.53        24.94 o
  -4   2   9          5.64         -5.47         6.81 o
  -3   2   9        181.14        185.15        13.71 o
  -2   2   9        335.59        405.24        18.70 o
  -1   2   9         55.34         43.44        10.29 o
   0   2   9        162.33        169.96        15.26 o
   1   2   9        715.94        745.13        30.91 o
   2   2   9         37.28         41.99         9.48 o
   3   2   9          0.04         -2.34        10.49 o
   4   2   9          0.32          3.83         7.47 o
   5   2   9        264.78        267.78        19.85 o
   6   2   9          4.72         -8.66        13.09 o
   7   2   9        361.79        389.88        25.83 o
   8   2   9         61.81         65.00        13.08 o
   9   2   9         56.27         52.97        11.94 o
  10   2   9          3.88         -1.93        10.88 o
  11   2   9         52.90         58.82        14.70 o
  12   2   9          5.12         -1.20        16.10 o
  13   2   9          1.72        -13.99        13.99 o
  14   2   9          0.67        -17.13        17.13 o
  15   2   9          1.34        -27.94        27.94 o
  16   2   9          1.18        -23.10        23.10 o
 -21   3   9          0.57        -11.58        11.58 o
 -20   3   9          1.11        -22.28        22.28 o
 -19   3   9          0.00        -27.09        27.09 o
 -18   3   9          2.33        -14.73        14.73 o
 -17   3   9          3.63         -2.34        13.76 o
 -16   3   9         12.39        -27.62        27.62 o
 -15   3   9          6.43          0.92        11.80 o
 -14   3   9          0.16        -10.70        10.70 o
 -13   3   9         90.03        123.14        17.41 o
 -12   3   9         61.07         82.97        17.51 o
 -11   3   9         76.41         96.64        14.29 o
 -10   3   9         26.39         48.66        11.18 o
  -9   3   9          3.32          3.18         9.49 o
  -8   3   9        223.31        263.60        31.88 o
  -7   3   9          1.26         -2.48         6.61 o
  -6   3   9          6.81         -8.20         8.20 o
  -5   3   9         23.11         14.02         8.68 o
  -4   3   9         73.52         87.19        13.74 o
  -3   3   9         15.80         18.80         8.88 o
  -2   3   9         86.33         56.71        16.73 o
  -1   3   9         57.04         97.40        14.16 o
   0   3   9        103.39        168.89        22.52 o
   1   3   9        182.94        143.90        18.99 o
   2   3   9          1.16         -1.66        10.90 o
   3   3   9          1.64         -8.45         8.45 o
   4   3   9         14.94          7.54        10.33 o
   5   3   9          6.33          2.83         9.27 o
   6   3   9         55.98         45.71        11.57 o
   7   3   9        121.96        148.45        26.84 o
   8   3   9          0.15        -10.58        10.58 o
   9   3   9         19.70         12.95        13.31 o
  10   3   9          0.05         -8.21        10.76 o
  11   3   9          0.43        -13.15        13.15 o
  12   3   9         11.69         11.76        17.42 o
  13   3   9          0.03        -12.96        12.96 o
  14   3   9          0.62         -4.32        21.48 o
  15   3   9          0.49        -18.13        18.13 o
 -20   4   9          0.14        -16.65        16.65 o
 -19   4   9          3.90          8.38        26.57 o
 -18   4   9          7.72        -21.44        21.44 o
 -17   4   9          7.73        -15.41        15.41 o
 -16   4   9          0.49        -13.42        13.42 o
 -15   4   9         10.61        -25.58        25.58 o
 -14   4   9          0.40        -16.49        16.49 o
 -13   4   9          0.22        -11.45        11.45 o
 -12   4   9         32.22         27.90        11.84 o
 -11   4   9          2.81         -3.14        11.10 o
 -10   4   9        112.28        143.41        18.03 o
  -9   4   9          6.87         -1.31        10.55 o
  -8   4   9          3.54         10.34         9.32 o
  -7   4   9         15.06         10.17         9.96 o
  -6   4   9         20.22         17.49         8.78 o
  -5   4   9          1.73        -10.38        10.38 o
  -4   4   9          1.53          1.52        10.31 o
  -3   4   9         18.49          9.42        11.30 o
  -2   4   9         75.06         57.32        14.46 o
  -1   4   9        248.63        329.30        23.89 o
   0   4   9         18.57          4.47        11.54 o
   1   4   9          2.73        -11.69        11.69 o
   2   4   9          0.88        -11.92        11.92 o
   3   4   9         43.52         41.76        10.49 o
   4   4   9         11.01         -1.20         8.61 o
   5   4   9         28.27          8.50        13.58 o
   6   4   9          2.41        -10.04        13.92 o
   7   4   9          3.45        -12.05        12.05 o
   8   4   9         31.28         30.55        14.25 o
   9   4   9          7.69         10.20        13.56 o
  10   4   9          6.18        -14.56        14.56 o
  11   4   9         10.71          3.99        21.14 o
  12   4   9          0.91        -15.29        20.44 o
  13   4   9          0.13          5.00        17.10 o
 -18   5   9          0.77        -16.02        21.50 o
 -17   5   9          0.21        -14.47        15.95 o
 -16   5   9          0.01        -15.48        15.48 o
 -15   5   9          0.46        -15.31        15.31 o
 -14   5   9         15.33          8.46        13.50 o
 -13   5   9          1.16        -20.56        20.56 o
 -12   5   9          6.14         14.50        23.83 o
 -11   5   9          0.34        -21.77        21.77 o
 -10   5   9          0.55          6.61        12.21 o
  -9   5   9          0.15        -14.85        14.85 o
  -8   5   9          2.55          2.01        13.21 o
  -7   5   9          2.33         -9.34        13.55 o
  -6   5   9          8.61         -3.51        16.13 o
  -5   5   9         47.43         37.23        25.25 o
  -4   5   9          5.60         -3.15        13.78 o
  -3   5   9          1.70         -9.44        15.24 o
  -2   5   9          2.45        -12.48        18.17 o
  -1   5   9         82.65         61.83        14.90 o
   0   5   9        101.59         88.19        26.53 o
   1   5   9          8.38        -13.74        13.74 o
   2   5   9         11.14         23.35        12.07 o
   3   5   9          1.51        -10.73        12.38 o
   4   5   9         57.25         60.13        14.52 o
   5   5   9          8.03          0.04        17.23 o
   6   5   9         65.49         58.74        35.54 o
   7   5   9         14.22         -4.13        15.29 o
   8   5   9          1.42         -3.89        18.40 o
   9   5   9          0.61        -18.30        18.30 o
  10   5   9          0.02          3.67        17.29 o
  11   5   9          0.00        -18.87        18.87 o
 -14   6   9          0.02        -12.67        12.67 o
 -13   6   9          0.03        -20.42        20.42 o
 -12   6   9          0.47        -14.67        14.67 o
 -11   6   9          0.13        -10.60        15.09 o
 -10   6   9          0.41        -11.71        15.45 o
  -9   6   9          5.56         -9.49        16.54 o
  -8   6   9         16.86          0.25        17.22 o
  -7   6   9          0.23        -17.34        17.34 o
  -6   6   9         11.61         -0.02        26.12 o
  -5   6   9          7.75        -15.85        15.85 o
  -4   6   9          0.02        -15.61        15.61 o
  -3   6   9          1.92         27.47        16.16 o
  -2   6   9          2.11          8.89        16.43 o
  -1   6   9          3.28        -13.30        14.38 o
   0   6   9          0.02        -18.02        18.02 o
   1   6   9          0.05         -9.83         9.83 o
   2   6   9          3.10         -9.06        19.70 o
   3   6   9          3.57        -23.13        23.13 o
   4   6   9          0.56         -6.79        16.04 o
   5   6   9          1.55         -8.96        18.14 o
   6   6   9          2.54        -22.38        22.38 o
   7   6   9          0.22        -29.81        29.81 o
   8   6   9          3.99        -20.82        20.82 o
  -8   7   9          0.06        -20.93        20.93 o
  -7   7   9          0.21         25.42        20.13 o
  -6   7   9          0.46        -18.13        18.13 o
  -5   7   9          8.98         43.33        19.88 o
  -4   7   9          0.00        -19.67        19.67 o
  -3   7   9          3.32        -17.61        17.61 o
  -2   7   9          1.42         -8.46        17.31 o
  -1   7   9          0.41        -15.75        15.75 o
   0   7   9          1.79        -21.43        21.43 o
   1   7   9          0.94        -11.06        19.46 o
   2   7   9          0.26        -17.24        17.24 o
 -23   0  10          1.26         11.16        36.19 o
 -22   0  10          4.94        -20.57        44.44 o
 -21   0  10         22.80         49.63        33.47 o
 -20   0  10          4.77        -25.34        25.34 o
 -19   0  10          9.46        -41.30        41.30 o
 -18   0  10         62.88         58.95        24.69 o
 -17   0  10          4.41         28.39        19.08 o
 -16   0  10         72.70         42.45        20.07 o
 -15   0  10         65.78         89.19        25.38 o
 -14   0  10          9.41         -3.24         8.56 o
 -13   0  10         50.97         54.36        11.06 o
 -12   0  10          1.69         -5.91         7.62 o
 -11   0  10         16.13         17.84         7.28 o
 -10   0  10         60.44         65.06        11.72 o
  -9   0  10        901.73        943.69        36.81 o
  -8   0  10       5158.91       5480.01       107.05 o
  -7   0  10          2.47          8.26         8.04 o
  -6   0  10         44.35         29.89         9.28 o
  -5   0  10        267.49        332.51        28.98 o
  -4   0  10       1168.33       1153.38        42.57 o
  -3   0  10          5.84          3.08         9.39 o
  -2   0  10         12.03          9.47         8.94 o
  -1   0  10       1238.75       1136.76        82.57 o
   0   0  10         25.68         32.53        14.72 o
   1   0  10         11.16         10.92        11.18 o
   2   0  10        470.00        449.67        31.57 o
   3   0  10        201.36        212.78        22.09 o
   4   0  10         43.26         65.85        16.29 o
   5   0  10        588.88        636.49        41.85 o
   6   0  10          0.31         21.30        19.02 o
   7   0  10        771.37        878.33        52.54 o
   8   0  10          3.11        -13.63        13.63 o
   9   0  10        118.87        107.54        27.02 o
  10   0  10          8.72         -6.96        15.00 o
  11   0  10         19.31         -1.16        23.77 o
  12   0  10         32.30         42.25        22.56 o
  13   0  10          7.83         -3.99        21.71 o
  14   0  10          3.98        -18.95        39.54 o
  15   0  10          6.20         -4.58        51.82 o
  16   0  10          0.75        -33.10        33.10 o
 -23   1  10          0.00        -55.52        55.52 o
 -22   1  10          0.01        -23.56        23.56 o
 -21   1  10          4.13        -21.47        21.47 o
 -20   1  10          0.15         -7.08        26.50 o
 -19   1  10          0.88        -24.44        24.44 o
 -18   1  10          0.11        -11.71        11.71 o
 -17   1  10         28.31         28.62        12.23 o
 -16   1  10         10.66         -9.70         9.70 o
 -15   1  10          3.61         -9.67         9.67 o
 -14   1  10        139.36        103.43        12.38 o
 -13   1  10          5.26         -6.09         8.53 o
 -12   1  10         31.58         23.32         8.20 o
 -11   1  10         45.13         77.36        14.60 o
 -10   1  10          7.14          1.43         6.48 o
  -9   1  10        143.00        138.26        13.33 o
  -8   1  10          9.36          2.48         5.26 o
  -7   1  10          8.59          0.93         4.92 o
  -6   1  10          3.70          4.32         5.00 o
  -5   1  10         35.34         42.99         7.19 o
  -4   1  10         19.95         16.21         6.00 o
  -3   1  10        137.87        144.16        11.12 o
  -2   1  10          3.11         -1.66         5.67 o
  -1   1  10        410.46        458.97        23.51 o
   0   1  10        400.65        349.68        19.38 o
   1   1  10        114.69        124.19        11.58 o
   2   1  10        304.32        346.04        21.25 o
   3   1  10        313.31        293.06        15.46 o
   4   1  10         29.01         12.61         6.95 o
   5   1  10        298.56        277.02        17.73 o
   6   1  10         52.28         53.41        10.34 o
   7   1  10          1.23         -3.01         9.32 o
   8   1  10         90.03         77.51        19.90 o
   9   1  10         29.82         19.99        13.30 o
  10   1  10          2.39          1.59        12.04 o
  11   1  10         25.28         15.94         9.09 o
  12   1  10          1.05         -7.07        15.56 o
  13   1  10          0.24        -20.12        20.12 o
  14   1  10          0.18        -20.13        20.13 o
  15   1  10          0.28        -13.46        20.50 o
  16   1  10          0.08        -21.80        21.80 o
 -22   2  10          0.07        -19.83        19.83 o
 -21   2  10          5.27         20.84        20.19 o
 -20   2  10          3.27          6.84        20.09 o
 -19   2  10          0.10        -19.46        19.46 o
 -18   2  10          0.48         -5.24        22.69 o
 -17   2  10         44.20         84.03        25.86 o
 -16   2  10          5.79         -9.17         9.17 o
 -15   2  10        109.67        102.33        38.75 o
 -14   2  10         21.64         26.79        11.08 o
 -13   2  10        422.78        471.56        30.93 o
 -12   2  10          0.02         -8.91         9.26 o
 -11   2  10         20.78         39.05        12.84 o
 -10   2  10         10.88          6.32        10.45 o
  -9   2  10         17.42          3.00         7.92 o
  -8   2  10        801.04        899.18        32.40 o
  -7   2  10        714.27        752.90        27.81 o
  -6   2  10         29.49         21.38         8.91 o
  -5   2  10         25.96         18.03         8.41 o
  -4   2  10        917.49        954.91        30.64 o
  -3   2  10          2.72         -2.32         7.72 o
  -2   2  10        705.08        745.05        27.34 o
  -1   2  10        209.38        192.56        15.59 o
   0   2  10        372.97        440.53        21.96 o
   1   2  10          1.09         -6.95         7.84 o
   2   2  10         17.03         18.36         8.60 o
   3   2  10        124.15        137.68        21.92 o
   4   2  10        701.69        676.81        28.71 o
   5   2  10          2.87          3.18         8.40 o
   6   2  10        237.23        294.84        17.54 o
   7   2  10         20.96          6.22         7.09 o
   8   2  10         83.30        133.45        17.47 o
   9   2  10          4.62        -11.76        11.76 o
  10   2  10         44.24         36.27        11.10 o
  11   2  10          2.14        -13.24        14.05 o
  12   2  10          4.01        -12.88        12.88 o
  13   2  10          5.08        -15.95        26.90 o
  14   2  10          2.12        -21.58        21.58 o
  15   2  10          5.72         -4.77        35.34 o
 -21   3  10          0.33        -47.52        47.52 o
 -20   3  10          1.56        -28.80        28.80 o
 -19   3  10          0.27        -20.09        20.09 o
 -18   3  10          3.98         25.69        16.47 o
 -17   3  10          0.73        -14.20        14.20 o
 -16   3  10          8.41         -5.92        13.12 o
 -15   3  10         20.92        -37.66        37.66 o
 -14   3  10          3.65        -11.19        11.19 o
 -13   3  10         67.13         65.34        19.78 o
 -12   3  10          0.31         -8.03        12.30 o
 -11   3  10          4.52         -8.71         9.64 o
 -10   3  10          6.17         -7.69        10.56 o
  -9   3  10         41.70         58.40        14.18 o
  -8   3  10        498.73        605.09        44.51 o
  -7   3  10          1.75         -6.83         9.24 o
  -6   3  10        197.81        192.87        16.08 o
  -5   3  10          1.29         -7.82         7.82 o
  -4   3  10          0.05          7.83         9.15 o
  -3   3  10        540.16        561.18        29.36 o
  -2   3  10         57.65         46.77        13.03 o
  -1   3  10        500.25        579.31        29.74 o
   0   3  10         22.09         29.56        10.52 o
   1   3  10        114.15        111.44        15.24 o
   2   3  10          6.02         10.65         9.46 o
   3   3  10         82.90         64.78        14.80 o
   4   3  10         12.57          3.44        11.70 o
   5   3  10          1.51         -6.60        11.27 o
   6   3  10        153.23        149.04        17.02 o
   7   3  10         42.72         37.71        11.54 o
   8   3  10          5.77          3.23        11.61 o
   9   3  10         19.24          8.67        15.02 o
  10   3  10          1.51         -1.70        11.51 o
  11   3  10          9.25         29.53        14.18 o
  12   3  10          5.76        -12.50        19.68 o
  13   3  10          0.19         13.21        16.62 o
  14   3  10          0.01        -19.25        19.25 o
 -19   4  10          0.98        -14.21        21.73 o
 -18   4  10          0.30        -23.40        23.40 o
 -17   4  10          1.60         -9.18        19.79 o
 -16   4  10          6.60         -4.53        12.05 o
 -15   4  10          0.37        -13.39        13.39 o
 -14   4  10          3.63         -1.06        13.44 o
 -13   4  10          4.02         -5.91        13.40 o
 -12   4  10         12.49         -4.20        16.02 o
 -11   4  10         21.19         24.91        17.45 o
 -10   4  10        173.16        199.44        30.40 o
  -9   4  10         22.50         25.74        13.27 o
  -8   4  10         79.68         78.78        14.72 o
  -7   4  10         14.11         21.51        11.34 o
  -6   4  10          1.97         -0.52        10.89 o
  -5   4  10          0.16         -4.48        11.14 o
  -4   4  10         49.90         48.44        14.34 o
  -3   4  10        100.56        108.35        21.60 o
  -2   4  10         12.07         13.98        12.44 o
  -1   4  10        311.10        341.16        25.29 o
   0   4  10         26.80         -1.74        12.35 o
   1   4  10         19.91         37.49        12.06 o
   2   4  10         49.44         31.27        12.45 o
   3   4  10          4.01        -11.37        11.37 o
   4   4  10         61.21         66.77        23.80 o
   5   4  10         41.71         59.63        14.06 o
   6   4  10          0.33         -3.85        12.24 o
   7   4  10         24.33         13.41        14.62 o
   8   4  10          4.86         -7.37        23.39 o
   9   4  10          0.02        -13.48        13.48 o
  10   4  10          0.16        -13.59        13.59 o
  11   4  10          2.91        -16.57        16.57 o
  12   4  10          0.01         17.64        26.18 o
 -17   5  10          2.05        -17.68        17.68 o
 -16   5  10          0.64         -3.17        18.31 o
 -15   5  10          0.21        -21.44        21.44 o
 -14   5  10          0.45        -14.75        14.75 o
 -13   5  10          4.66         -1.18        14.95 o
 -12   5  10          4.29         27.38        19.30 o
 -11   5  10          2.36        -18.46        18.46 o
 -10   5  10          2.82          9.17        19.41 o
  -9   5  10         22.17         30.74        12.81 o
  -8   5  10         17.52         29.44        15.80 o
  -7   5  10          4.38          2.53        16.01 o
  -6   5  10          2.40        -10.18        16.26 o
  -5   5  10          0.00         -8.40         8.40 o
  -4   5  10          0.02         -3.58        15.44 o
  -3   5  10          0.13          3.88        12.89 o
  -2   5  10         10.84         -3.62        13.56 o
  -1   5  10          9.07         -6.57        14.77 o
   0   5  10         51.26         46.30        13.61 o
   1   5  10          0.29        -12.66        12.66 o
   2   5  10          1.15        -13.06        13.06 o
   3   5  10          2.73        -11.91        12.14 o
   4   5  10         11.04         -2.04        13.52 o
   5   5  10         13.24        -14.59        16.83 o
   6   5  10          5.90         -6.22        16.13 o
   7   5  10          1.09        -14.70        14.70 o
   8   5  10         25.88         34.26        31.12 o
   9   5  10         18.00         64.38        32.40 o
  10   5  10          0.00        -11.69        31.05 o
 -14   6  10          0.15        -17.87        17.87 o
 -13   6  10          0.14        -15.84        15.84 o
 -12   6  10          2.99        -15.56        15.56 o
 -11   6  10          3.18        -18.01        18.01 o
 -10   6  10          0.06         -9.50        17.03 o
  -9   6  10          1.30         15.10        16.79 o
  -8   6  10          3.30        -11.62        18.09 o
  -7   6  10          0.39        -17.84        29.69 o
  -6   6  10          4.25        -17.30        17.30 o
  -5   6  10          7.86        -14.13        14.13 o
  -4   6  10         21.11         35.59        17.43 o
  -3   6  10          0.19        -26.61        26.61 o
  -2   6  10          2.73         10.94        14.28 o
  -1   6  10          6.40         -2.27        13.63 o
   0   6  10          0.15        -17.00        17.00 o
   1   6  10         10.24         11.93        14.74 o
   2   6  10          1.96          8.81        15.17 o
   3   6  10          0.04        -26.24        26.24 o
   4   6  10          2.33        -13.70        16.32 o
   5   6  10          4.19        -18.91        18.91 o
   6   6  10          0.23        -17.32        17.32 o
   7   6  10          0.79        -18.59        18.81 o
  -6   7  10          4.29        -20.18        23.21 o
  -5   7  10          2.70        -17.17        17.17 o
  -4   7  10          1.67         -6.67        19.47 o
  -3   7  10          5.56        -19.85        21.20 o
  -2   7  10          1.67         -8.61         8.61 o
  -1   7  10          0.33        -12.36        15.48 o
 -22   1  11          0.22        -16.44        28.88 o
 -21   1  11         12.91        -13.72        23.26 o
 -20   1  11          8.91         32.99        33.23 o
 -19   1  11          0.70        -20.44        20.44 o
 -18   1  11          6.45        -41.28        41.28 o
 -17   1  11         14.25          9.87        18.58 o
 -16   1  11         34.15         39.32        12.84 o
 -15   1  11          0.83        -13.16        13.16 o
 -14   1  11        281.23        249.39        23.14 o
 -13   1  11        184.64        191.45        17.36 o
 -12   1  11         64.33         60.76        11.15 o
 -11   1  11         15.95         17.49         9.28 o
 -10   1  11          0.08          3.51         5.80 o
  -9   1  11        241.04        294.39        15.03 o
  -8   1  11          0.11         -5.22         5.22 o
  -7   1  11        276.17        348.63        15.98 o
  -6   1  11        130.84        118.77        10.46 o
  -5   1  11        436.90        420.65        18.58 o
  -4   1  11          1.09         -6.37         6.37 o
  -3   1  11          0.03         -6.11         6.53 o
  -2   1  11         26.16         16.22         8.53 o
  -1   1  11         85.15         77.55        10.82 o
   0   1  11        240.16        223.88        15.71 o
   1   1  11         38.78         28.66        14.41 o
   2   1  11          2.27         -3.12        12.45 o
   3   1  11         69.45         86.15        13.35 o
   4   1  11         17.55          6.99         7.08 o
   5   1  11        422.00        434.55        58.40 o
   6   1  11        165.51        193.06        28.97 o
   7   1  11        115.60        109.36        26.54 o
   8   1  11          7.31         -3.18        12.61 o
   9   1  11          0.09         -9.55         9.55 o
  10   1  11          4.26         -3.83        16.01 o
  11   1  11          2.40        -15.04        15.04 o
  12   1  11         12.45        -48.27        48.27 o
  13   1  11          9.37         -5.69        20.29 o
  14   1  11         14.15        -17.65        21.29 o
  15   1  11         15.48        -22.09        26.23 o
 -22   2  11          0.94        -27.90        27.90 o
 -21   2  11          0.04         10.76        25.25 o
 -20   2  11          0.31        -14.66        14.66 o
 -19   2  11          0.18        -30.49        30.49 o
 -18   2  11          2.69        -14.22        14.22 o
 -17   2  11          0.00         -2.93        12.02 o
 -16   2  11          5.90         -7.38        13.23 o
 -15   2  11          0.01         -4.72        10.25 o
 -14   2  11          1.81         -3.54        10.96 o
 -13   2  11         98.58        108.84        14.50 o
 -12   2  11         24.74         16.75        15.45 o
 -11   2  11         63.89         97.88        14.91 o
 -10   2  11        104.63        126.48        20.89 o
  -9   2  11          2.21         -9.14         9.14 o
  -8   2  11        247.06        301.87        18.00 o
  -7   2  11        648.19        635.75        30.36 o
  -6   2  11          5.23         -9.57         9.57 o
  -5   2  11         66.11         52.53         9.74 o
  -4   2  11         54.18         45.27        10.12 o
  -3   2  11          0.70         -2.13         8.73 o
  -2   2  11        115.87        147.24        13.68 o
  -1   2  11        243.08        289.98        18.34 o
   0   2  11         37.98         50.77         9.04 o
   1   2  11         17.81         13.27         9.76 o
   2   2  11          6.62         11.25        10.49 o
   3   2  11         15.03         14.23         9.54 o
   4   2  11         57.38         59.93        10.84 o
   5   2  11          0.00         -8.42         8.42 o
   6   2  11          1.16         -8.37        12.90 o
   7   2  11          8.27         13.53        12.28 o
   8   2  11          4.30         11.76        12.10 o
   9   2  11         21.45          1.08        12.11 o
  10   2  11          0.65         -3.67        10.86 o
  11   2  11          1.37         -9.00        14.86 o
  12   2  11          0.07        -14.60        14.60 o
  13   2  11          0.34        -19.54        19.54 o
  14   2  11          0.80        -25.99        25.99 o
 -21   3  11          0.00        -26.59        26.59 o
 -20   3  11          0.94        -45.30        45.30 o
 -19   3  11          0.21        -15.89        15.89 o
 -18   3  11          6.77        -15.74        15.74 o
 -17   3  11          0.52        -15.71        15.71 o
 -16   3  11         16.17        -34.37        34.37 o
 -15   3  11          0.52         -6.64        13.87 o
 -14   3  11         19.69         41.62        13.34 o
 -13   3  11         10.47         10.47        17.02 o
 -12   3  11          0.01         -6.82        12.69 o
 -11   3  11         41.52         34.66        12.60 o
 -10   3  11         35.69          9.85        13.25 o
  -9   3  11        163.17        181.85        27.75 o
  -8   3  11        195.94        179.19        19.35 o
  -7   3  11         23.67         12.54         9.96 o
  -6   3  11         74.26         81.02        12.79 o
  -5   3  11          2.35         -9.87         9.87 o
  -4   3  11         26.76         24.67        12.79 o
  -3   3  11         48.95         61.87        12.77 o
  -2   3  11         13.96          7.83        12.58 o
  -1   3  11          4.14        -10.00        10.00 o
   0   3  11          3.18        -11.04        11.04 o
   1   3  11         14.62          8.78        11.09 o
   2   3  11        348.15        421.19        43.75 o
   3   3  11         89.25        102.11        16.99 o
   4   3  11         81.08         73.85        20.84 o
   5   3  11        357.30        473.39        27.99 o
   6   3  11         17.11         21.46        15.96 o
   7   3  11         68.52         83.53        16.10 o
   8   3  11         13.65         -7.52        12.48 o
   9   3  11         12.36         32.43        14.16 o
  10   3  11          7.33         13.98        15.80 o
  11   3  11          0.14         -5.02        22.88 o
  12   3  11          2.89        -21.01        22.50 o
  13   3  11          0.00        -20.03        20.03 o
 -19   4  11          2.53        -19.44        22.71 o
 -18   4  11          2.32        -23.99        23.99 o
 -17   4  11          4.66        -12.02        18.53 o
 -16   4  11          1.68         14.24        13.83 o
 -15   4  11         12.36        -27.96        27.96 o
 -14   4  11         11.89         12.59        16.99 o
 -13   4  11          1.07        -15.51        15.51 o
 -12   4  11          0.34         -1.55        17.26 o
 -11   4  11         10.63        -14.92        14.92 o
 -10   4  11         25.03         31.15        12.35 o
  -9   4  11          0.38        -12.09        12.09 o
  -8   4  11         34.92         26.11        12.04 o
  -7   4  11         97.04        124.66        24.55 o
  -6   4  11         22.43        -12.31        12.31 o
  -5   4  11         25.36          5.03        12.07 o
  -4   4  11          9.60        -12.58        12.58 o
  -3   4  11         98.39        165.74        19.07 o
  -2   4  11         12.45          8.38        13.15 o
  -1   4  11         60.07         71.32        15.15 o
   0   4  11          9.55          2.09        12.64 o
   1   4  11        237.64        313.76        26.65 o
   2   4  11          2.92        -11.27        11.27 o
   3   4  11         13.64          1.69        12.94 o
   4   4  11          0.37        -12.49        12.49 o
   5   4  11          1.22        -11.80        17.40 o
   6   4  11          1.39         -5.70        12.72 o
   7   4  11          0.42         20.60        14.90 o
   8   4  11         15.35         18.58        14.78 o
   9   4  11         22.99         23.17        15.25 o
  10   4  11          4.53         12.91        18.52 o
  11   4  11          0.11        -21.98        21.98 o
 -17   5  11          1.40        -22.54        22.54 o
 -16   5  11          0.17        -19.85        19.85 o
 -15   5  11          0.72        -24.39        24.39 o
 -14   5  11          2.74        -18.86        18.86 o
 -13   5  11          0.31        -11.58        11.58 o
 -12   5  11          0.00        -10.17        19.92 o
 -11   5  11          6.42        -11.63        13.37 o
 -10   5  11          1.00        -15.21        15.21 o
  -9   5  11          0.14        -12.18        12.18 o
  -8   5  11         60.93         -3.44        31.56 o
  -7   5  11         55.75        102.81        17.89 o
  -6   5  11          1.16         -5.08        15.91 o
  -5   5  11         33.13         44.17        19.37 o
  -4   5  11         66.65         48.00        16.73 o
  -3   5  11          2.00         -6.52         6.52 o
  -2   5  11          2.74        -11.07        11.97 o
  -1   5  11          5.54         -3.02        12.78 o
   0   5  11         13.60          2.30        12.44 o
   1   5  11          0.17        -13.25        13.25 o
   2   5  11          0.00        -12.70        12.70 o
   3   5  11         18.90         16.99        25.75 o
   4   5  11          9.75         -4.76        14.86 o
   5   5  11         48.64         51.53        30.15 o
   6   5  11          0.03         -6.13        14.96 o
   7   5  11         10.61         38.97        16.23 o
   8   5  11          3.17         -8.02        22.12 o
   9   5  11          0.67        -18.07        18.07 o
 -13   6  11          0.80          4.91        17.19 o
 -12   6  11          0.40        -16.13        16.13 o
 -11   6  11          3.34        -15.01        18.37 o
 -10   6  11          6.73          0.39        15.92 o
  -9   6  11          3.57        -14.78        17.47 o
  -8   6  11          6.82         -9.22        15.84 o
  -7   6  11         11.98         13.72        14.89 o
  -6   6  11          0.33        -11.22        11.22 o
  -5   6  11          0.14        -13.21        13.21 o
  -4   6  11          0.39        -31.71        31.71 o
  -3   6  11          0.16        -14.41        14.41 o
  -2   6  11          4.68         -1.82        14.35 o
  -1   6  11          3.60        -31.08        31.08 o
   0   6  11          1.09        -15.67        15.67 o
   1   6  11          0.00        -16.11        16.11 o
   2   6  11          0.11        -19.76        19.76 o
   3   6  11          0.01        -17.64        17.64 o
   4   6  11          0.05        -18.04        18.04 o
   5   6  11          1.72        -19.97        19.97 o
 -22   0  12          0.02         23.67        38.84 o
 -21   0  12          4.41        -30.35        32.95 o
 -20   0  12          5.90         30.46        28.29 o
 -19   0  12          0.11          8.03        25.80 o
 -18   0  12         14.53        -23.05        23.05 o
 -17   0  12          2.56        -34.68        34.68 o
 -16   0  12          0.03        -10.66        16.21 o
 -15   0  12         33.92         38.86        20.87 o
 -14   0  12         46.38         39.33        25.69 o
 -13   0  12         25.87         17.83        18.75 o
 -12   0  12        157.11        150.51        25.19 o
 -11   0  12          1.41         19.21        14.80 o
 -10   0  12        151.47        196.78        41.08 o
  -9   0  12        691.24        740.52        37.64 o
  -8   0  12          9.27          0.50        31.90 o
  -7   0  12        271.84        318.46        23.66 o
  -6   0  12          6.31         23.60        10.53 o
  -5   0  12         19.24         -3.31        10.77 o
  -4   0  12          2.06        -12.40        12.40 o
  -3   0  12          0.06        -10.88        16.60 o
  -2   0  12         76.31         68.41        18.40 o
  -1   0  12         35.78         -2.36        22.88 o
   0   0  12        172.26        221.25        28.44 o
   1   0  12         65.81         49.60        26.71 o
   2   0  12        849.54       1012.47        64.26 o
   3   0  12         32.14         -1.56        13.72 o
   4   0  12        124.61         85.32        68.30 o
   5   0  12         20.51         18.77        27.87 o
   6   0  12        138.73        138.87        35.93 o
   7   0  12        205.08        193.84        30.26 o
   8   0  12         34.82         55.04        22.22 o
   9   0  12         35.89         77.25        47.91 o
  10   0  12          5.52        -17.90        21.35 o
  11   0  12          0.75        -23.20        44.67 o
  12   0  12          0.00        -39.79        39.79 o
  13   0  12         16.54         -6.86        25.74 o
  14   0  12         19.73          3.50        33.87 o
 -22   1  12          3.03         -3.54        23.36 o
 -21   1  12          1.61        -22.37        22.37 o
 -20   1  12          0.16        -20.45        20.45 o
 -19   1  12          6.45        -15.28        17.17 o
 -18   1  12          2.25        -19.80        19.80 o
 -17   1  12          4.99        -11.43        11.43 o
 -16   1  12         43.36         79.34        16.80 o
 -15   1  12         27.03         22.17        13.80 o
 -14   1  12         14.92         20.52        14.80 o
 -13   1  12          6.97          6.23        10.88 o
 -12   1  12          2.68         -9.31        11.25 o
 -11   1  12         15.33          7.28         8.27 o
 -10   1  12         31.35         31.31         8.62 o
  -9   1  12         14.32          9.17        10.81 o
  -8   1  12         23.19          1.10         6.94 o
  -7   1  12         14.81         -0.40         7.04 o
  -6   1  12         61.71         58.52         9.80 o
  -5   1  12         60.56         63.31         9.83 o
  -4   1  12        158.11        123.36        14.79 o
  -3   1  12         33.06         20.42         8.11 o
  -2   1  12         34.01         30.86         9.31 o
  -1   1  12         81.95         91.89        11.58 o
   0   1  12        203.71        244.79        23.04 o
   1   1  12        176.50        152.87        15.60 o
   2   1  12        269.48        290.42        28.69 o
   3   1  12         33.05         39.25         9.56 o
   4   1  12         36.61         35.83        13.10 o
   5   1  12        159.29        181.37        21.81 o
   6   1  12          8.92         18.69        11.81 o
   7   1  12          3.44         -0.56        11.83 o
   8   1  12         50.12         46.08        14.69 o
   9   1  12          6.01         -0.23        12.53 o
  10   1  12          0.00        -14.01        14.01 o
  11   1  12          5.85         -5.72        16.45 o
  12   1  12          0.68        -13.98        18.18 o
  13   1  12          3.18        -20.30        20.30 o
  14   1  12          0.33         17.60        28.81 o
 -21   2  12          2.32         22.35        23.44 o
 -20   2  12          3.02         -5.78        21.55 o
 -19   2  12          0.31         -7.16         7.16 o
 -18   2  12          9.56         24.33        18.44 o
 -17   2  12          5.91          2.59        16.91 o
 -16   2  12          0.82        -12.45        14.80 o
 -15   2  12         16.15         17.77        19.70 o
 -14   2  12         16.71         34.27        11.93 o
 -13   2  12          0.06         -0.41        11.21 o
 -12   2  12         55.31         50.82        12.87 o
 -11   2  12          1.68         -7.92        11.13 o
 -10   2  12          6.35         -9.62         9.62 o
  -9   2  12         28.73          4.62         9.67 o
  -8   2  12         14.42          5.66         9.59 o
  -7   2  12        139.59        147.17        23.77 o
  -6   2  12         94.34        113.01        14.59 o
  -5   2  12          2.76         -7.70         8.06 o
  -4   2  12         18.30         18.89         9.49 o
  -3   2  12         45.70         34.48        10.75 o
  -2   2  12        413.28        396.97        22.38 o
  -1   2  12        217.66        312.32        32.28 o
   0   2  12         52.59         51.89        12.22 o
   1   2  12        130.87        103.60        13.97 o
   2   2  12        119.92        117.90        15.22 o
   3   2  12        194.12        202.32        32.33 o
   4   2  12         72.87         68.95        12.44 o
   5   2  12         53.21         43.52        11.36 o
   6   2  12         21.89         22.43        12.06 o
   7   2  12          7.80         -9.57        16.03 o
   8   2  12          1.50        -13.55        17.94 o
   9   2  12          1.34          6.46        13.22 o
  10   2  12          0.00        -15.37        26.83 o
  11   2  12          2.03        -14.69        14.69 o
  12   2  12          0.34         -8.74        19.33 o
  13   2  12          0.72        -22.31        22.31 o
 -20   3  12          3.98         -8.41        25.46 o
 -19   3  12          2.60        -31.73        31.73 o
 -18   3  12          1.43        -14.01        14.67 o
 -17   3  12          9.44        -15.08        15.08 o
 -16   3  12          0.31        -12.52        15.89 o
 -15   3  12          1.92        -13.81        13.81 o
 -14   3  12          2.85         -2.29        13.74 o
 -13   3  12          1.77         -6.37        12.70 o
 -12   3  12          5.05        -14.13        14.50 o
 -11   3  12          6.71          8.53        12.37 o
 -10   3  12         28.83         31.45        16.51 o
  -9   3  12          0.12        -10.39        10.39 o
  -8   3  12         15.50         20.77        11.07 o
  -7   3  12        102.90         88.97        14.41 o
  -6   3  12         98.27        116.44        15.35 o
  -5   3  12         40.66         28.18        17.73 o
  -4   3  12         16.45          6.28        16.03 o
  -3   3  12          3.22         -3.20        10.49 o
  -2   3  12         37.55         25.09        13.53 o
  -1   3  12        144.02        167.77        41.99 o
   0   3  12         11.63         15.64        12.65 o
   1   3  12         50.56         39.58        12.59 o
   2   3  12         62.48         59.78        15.42 o
   3   3  12          5.06          9.12        13.12 o
   4   3  12          0.37         -9.22        12.34 o
   5   3  12         26.05         20.30        14.29 o
   6   3  12          0.96        -12.24        12.24 o
   7   3  12         19.95         11.20        13.36 o
   8   3  12         32.73         34.54        15.88 o
   9   3  12         10.25         18.43        14.39 o
  10   3  12          0.00        -13.59        13.59 o
  11   3  12          0.00        -16.98        16.98 o
  12   3  12          1.31        -15.09        25.17 o
 -18   4  12          0.34        -19.03        19.03 o
 -17   4  12          0.63        -15.68        15.68 o
 -16   4  12          1.10        -11.42        15.01 o
 -15   4  12         11.39         20.96        15.06 o
 -14   4  12          0.74        -17.35        17.88 o
 -13   4  12          3.34         12.39        14.61 o
 -12   4  12          0.36        -14.74        16.83 o
 -11   4  12          0.48        -23.25        23.25 o
 -10   4  12          2.67        -17.65        17.65 o
  -9   4  12         61.23         54.56        13.23 o
  -8   4  12          6.93         -8.32        14.02 o
  -7   4  12        123.42        142.26        20.08 o
  -6   4  12          0.57         -6.65        12.16 o
  -5   4  12          1.41        -10.82        14.58 o
  -4   4  12          1.88        -12.62        12.62 o
  -3   4  12          3.64          2.18        10.71 o
  -2   4  12         20.73         18.71        13.24 o
  -1   4  12          0.82          7.24        10.56 o
   0   4  12          1.96        -11.34        11.34 o
   1   4  12          2.62          1.16        11.66 o
   2   4  12          9.04        -10.28        12.96 o
   3   4  12          4.24        -13.76        13.76 o
   4   4  12         11.67        -13.87        13.87 o
   5   4  12          3.42        -15.91        21.78 o
   6   4  12          0.96        -14.77        14.77 o
   7   4  12          4.50        -14.83        14.83 o
   8   4  12          0.77        -13.27        13.27 o
   9   4  12          0.42        -15.39        15.39 o
  10   4  12          5.30         35.85        24.40 o
 -16   5  12          0.01         14.92        17.88 o
 -15   5  12          0.47        -17.05        17.05 o
 -14   5  12          0.12         -8.07         8.07 o
 -13   5  12          0.60        -16.96        16.96 o
 -12   5  12          0.74        -11.65        14.91 o
 -11   5  12         13.25          7.91        21.32 o
 -10   5  12          3.66        -21.29        21.29 o
  -9   5  12          2.23        -14.90        14.90 o
  -8   5  12         57.68         43.84        18.89 o
  -7   5  12         48.79         17.97        24.44 o
  -6   5  12          8.25         13.83        18.16 o
  -5   5  12          8.10          1.20        14.59 o
  -4   5  12         14.83         -5.82        13.25 o
  -3   5  12          0.10         -7.11        13.03 o
  -2   5  12          3.61        -16.33        16.97 o
  -1   5  12          1.11        -12.95        12.95 o
   0   5  12         10.74         -1.19        14.12 o
   1   5  12          2.06        -13.14        14.78 o
   2   5  12          1.60         -6.73        14.97 o
   3   5  12          0.19        -15.56        15.56 o
   4   5  12          1.10        -19.98        19.98 o
   5   5  12          0.04        -16.18        16.18 o
   6   5  12          0.42        -16.06        16.06 o
   7   5  12          0.05        -15.22        15.22 o
 -11   6  12          0.04         10.83        17.09 o
 -10   6  12          0.98        -30.99        30.99 o
  -9   6  12          2.12        -19.69        19.69 o
  -8   6  12          0.04        -16.86        16.86 o
  -7   6  12          0.01        -10.78        18.71 o
  -6   6  12          0.17         -1.45        14.61 o
  -5   6  12         14.00        -11.72        15.96 o
  -4   6  12          1.87        -22.27        22.27 o
  -3   6  12         17.52         18.10        16.78 o
  -2   6  12          0.00        -14.16        25.85 o
  -1   6  12          2.21         21.83        14.33 o
   0   6  12          3.47         -4.04        17.81 o
   1   6  12          1.70         -5.83        17.19 o
   2   6  12          7.45         21.77        19.06 o
   3   6  12          1.23        -13.41        20.83 o
 -22   1  13          3.34        -27.49        27.49 o
 -21   1  13          4.36          8.32        23.74 o
 -20   1  13          0.12        -20.14        20.14 o
 -19   1  13          1.46        -26.35        26.35 o
 -18   1  13          0.06         -5.84        15.96 o
 -17   1  13          4.49          7.48        13.92 o
 -16   1  13         42.55         21.39        13.97 o
 -15   1  13         60.71        105.53        19.15 o
 -14   1  13         61.47         46.84        22.31 o
 -13   1  13         17.66          6.86        13.78 o
 -12   1  13        281.08        299.30        27.16 o
 -11   1  13         20.58         18.10        12.90 o
 -10   1  13         24.47         29.65        10.11 o
  -9   1  13         78.89         66.11        12.39 o
  -8   1  13        538.68        593.00        23.47 o
  -7   1  13         12.07          6.06         9.22 o
  -6   1  13          0.35         -1.61         8.00 o
  -5   1  13         15.95         -1.89         8.41 o
  -4   1  13        126.10        107.44        12.57 o
  -3   1  13        576.11        654.22        28.84 o
  -2   1  13        280.20        314.05        19.72 o
  -1   1  13         28.99         20.78         9.33 o
   0   1  13        256.90        262.34        33.39 o
   1   1  13         56.05         24.85        15.38 o
   2   1  13         41.71         28.56        10.43 o
   3   1  13        100.12         88.06        14.73 o
   4   1  13          5.13        -10.78        10.78 o
   5   1  13         15.17         11.49        12.48 o
   6   1  13          6.21          5.11        14.04 o
   7   1  13         67.08         36.50        22.84 o
   8   1  13         45.06         57.96        15.36 o
   9   1  13          0.14        -12.49        12.49 o
  10   1  13          0.01         12.67        26.26 o
  11   1  13          0.72         -9.91        23.43 o
  12   1  13          0.93        -21.90        21.90 o
 -21   2  13          2.81        -24.69        24.69 o
 -20   2  13          2.11         14.82        25.29 o
 -19   2  13          1.51         12.25        23.49 o
 -18   2  13          2.98        -12.17        12.17 o
 -17   2  13          2.25         -6.61        24.07 o
 -16   2  13         18.14         -3.74        18.70 o
 -15   2  13          0.00        -12.18        12.18 o
 -14   2  13          6.05         -9.28        11.70 o
 -13   2  13         48.96         68.17        15.29 o
 -12   2  13         72.59         70.99        18.43 o
 -11   2  13         71.98         47.24        12.83 o
 -10   2  13         18.65          7.45        12.09 o
  -9   2  13          1.94         -8.14         9.23 o
  -8   2  13          4.60          8.31        13.67 o
  -7   2  13        335.50        381.67        36.12 o
  -6   2  13        225.14        234.11        21.62 o
  -5   2  13          0.32         -8.22         8.22 o
  -4   2  13          2.54        -11.33        11.33 o
  -3   2  13          0.57         -2.27        11.96 o
  -2   2  13        122.21         96.34        14.72 o
  -1   2  13         87.94         74.21        12.59 o
   0   2  13          3.75         -5.34         9.39 o
   1   2  13         48.99         48.25        12.57 o
   2   2  13        140.15        155.99        26.91 o
   3   2  13         35.52         25.21        11.49 o
   4   2  13          0.14          8.02         9.81 o
   5   2  13          7.17        -11.23        13.40 o
   6   2  13         49.58         46.43        14.18 o
   7   2  13          1.06        -12.54        12.54 o
   8   2  13          1.01        -20.14        20.14 o
   9   2  13          0.45         -2.85        15.47 o
  10   2  13          0.94        -16.08        16.08 o
  11   2  13          1.55         13.16        16.53 o
  12   2  13          9.72         33.93        26.34 o
 -20   3  13          5.98        -10.26        10.26 o
 -19   3  13          1.03         -5.38        22.43 o
 -18   3  13          6.39         -8.64        16.12 o
 -17   3  13          0.43         21.37        17.00 o
 -16   3  13          0.10         16.17        20.81 o
 -15   3  13          1.87          6.44        15.08 o
 -14   3  13          3.09        -10.53        14.37 o
 -13   3  13         10.58         18.18        16.08 o
 -12   3  13         66.70         70.93        21.25 o
 -11   3  13         50.83         33.60        15.45 o
 -10   3  13          7.69          8.34        12.78 o
  -9   3  13        168.74        162.32        18.04 o
  -8   3  13        263.89        360.02        29.10 o
  -7   3  13          9.91         10.97        13.71 o
  -6   3  13         15.65        -21.98        21.98 o
  -5   3  13          2.00        -10.45        10.45 o
  -4   3  13         49.47         56.28        12.52 o
  -3   3  13          0.00         -8.62        15.67 o
  -2   3  13         59.28         49.49        22.50 o
  -1   3  13         12.64          9.22        12.77 o
   0   3  13          4.53        -10.88        10.88 o
   1   3  13          0.23        -10.23        10.23 o
   2   3  13         18.92          5.16        17.64 o
   3   3  13          5.42         -8.09        18.77 o
   4   3  13          4.72          5.67        14.21 o
   5   3  13          3.33         -7.35        13.62 o
   6   3  13          0.42        -14.22        14.22 o
   7   3  13         29.58         38.16        16.56 o
   8   3  13          0.12        -13.33        13.33 o
   9   3  13         13.47         20.42        14.24 o
  10   3  13          0.82        -19.70        19.70 o
 -18   4  13          3.02         14.29        17.41 o
 -17   4  13          6.46        -21.84        21.84 o
 -16   4  13          4.50         -7.53        19.06 o
 -15   4  13          0.35         26.09        18.72 o
 -14   4  13         12.74          3.28        20.09 o
 -13   4  13          0.12        -13.67        13.67 o
 -12   4  13          3.16        -12.69        12.69 o
 -11   4  13         47.54         66.27        18.85 o
 -10   4  13         90.96         69.37        16.90 o
  -9   4  13          2.01        -10.54        13.30 o
  -8   4  13         54.31         35.50        21.98 o
  -7   4  13        159.87        189.30        23.60 o
  -6   4  13         49.17         52.58        15.97 o
  -5   4  13          2.99          3.71        14.35 o
  -4   4  13          0.03          0.81        14.22 o
  -3   4  13         13.07         29.88        11.67 o
  -2   4  13          1.78        -11.22        12.35 o
  -1   4  13          1.14          9.13        11.53 o
   0   4  13          2.58        -16.11        16.11 o
   1   4  13         25.97         10.40        20.04 o
   2   4  13          1.67          5.50        12.93 o
   3   4  13         12.12         29.39        17.20 o
   4   4  13          5.44        -17.68        17.68 o
   5   4  13          0.31        -22.60        22.60 o
   6   4  13          1.16         -7.84        14.68 o
   7   4  13          4.36        -13.28        13.28 o
   8   4  13          0.48        -17.96        21.45 o
   9   4  13          0.90        -10.62        37.12 o
 -15   5  13          0.83        -18.72        18.72 o
 -14   5  13          0.01        -20.45        20.45 o
 -13   5  13          0.35        -17.82        17.82 o
 -12   5  13         17.09         11.03        19.11 o
 -11   5  13          5.65        -17.54        17.54 o
 -10   5  13          0.03        -17.16        17.16 o
  -9   5  13          5.55         -8.52         8.52 o
  -8   5  13         15.91         -7.19        18.88 o
  -7   5  13          0.34        -13.83        13.83 o
  -6   5  13          8.40         13.59        14.23 o
  -5   5  13          1.81         -7.75        20.76 o
  -4   5  13          0.01        -17.30        17.30 o
  -3   5  13          4.76         -8.66        14.52 o
  -2   5  13          3.53        -14.11        14.11 o
  -1   5  13         11.60          6.96        15.14 o
   0   5  13          6.20        -18.19        18.19 o
   1   5  13          3.57         10.39        20.79 o
   2   5  13          2.97        -13.39        16.10 o
   3   5  13          3.84         -7.81         7.81 o
   4   5  13          1.14        -13.53        16.22 o
   5   5  13          1.74        -20.93        20.93 o
   6   5  13          0.08        -15.53        15.53 o
  -9   6  13          0.33         -3.72        16.71 o
  -8   6  13          0.01         23.80        18.97 o
  -7   6  13          1.40        -16.49        16.49 o
  -6   6  13          0.15        -20.12        20.12 o
  -5   6  13          2.03        -17.41        17.41 o
  -4   6  13          0.24        -18.49        18.49 o
  -3   6  13          2.15        -13.21        19.08 o
  -2   6  13          3.18        -19.82        19.82 o
  -1   6  13          3.74        -18.44        21.26 o
   0   6  13          7.38          1.34        21.85 o
 -21   0  14         11.57        -46.80        46.80 o
 -20   0  14          0.53        -19.52        19.52 o
 -19   0  14          0.26        -14.52        21.49 o
 -18   0  14          4.95        -25.35        25.35 o
 -17   0  14         13.15          0.97        17.24 o
 -16   0  14         34.42         27.69        20.44 o
 -15   0  14         86.12         88.73        25.37 o
 -14   0  14          7.48          3.71        40.48 o
 -13   0  14         66.02         54.80        26.00 o
 -12   0  14        112.70        119.20        38.66 o
 -11   0  14        330.65        330.57        87.57 o
 -10   0  14          0.16          8.05        18.19 o
  -9   0  14         71.26         76.12        18.46 o
  -8   0  14        908.50       1051.39        70.17 o
  -7   0  14        446.25        551.14        37.52 o
  -6   0  14        123.04         80.94        17.27 o
  -5   0  14        110.10        106.15        19.63 o
  -4   0  14          0.04          7.70        17.60 o
  -3   0  14        109.15         63.95        32.91 o
  -2   0  14        283.64        259.05        37.45 o
  -1   0  14        216.45        268.37        32.16 o
   0   0  14         75.59         38.39        27.84 o
   1   0  14          3.62        -17.55        17.55 o
   2   0  14        121.24        144.07        24.27 o
   3   0  14        120.80        138.27        38.14 o
   4   0  14         10.85        -14.87        14.87 o
   5   0  14         41.54         42.53        18.33 o
   6   0  14         17.63         12.57        18.55 o
   7   0  14         40.00         13.35        19.16 o
   8   0  14          6.14          0.00        17.86 o
   9   0  14          3.95          2.46        26.85 o
  10   0  14          7.93        -32.48        32.48 o
  11   0  14          8.32        -35.31        42.77 o
 -21   1  14          3.68        -15.23        15.23 o
 -20   1  14          0.00         -9.93        16.69 o
 -19   1  14          0.09        -12.12        12.12 o
 -18   1  14          0.75         25.69        17.94 o
 -17   1  14          0.82         -0.55        18.45 o
 -16   1  14         28.54         36.18        15.96 o
 -15   1  14          0.45         26.27        17.80 o
 -14   1  14          1.18        -15.53        15.53 o
 -13   1  14         31.68         12.16        12.97 o
 -12   1  14          0.30          4.31        10.69 o
 -11   1  14         44.96         72.83        11.35 o
 -10   1  14          3.75         12.07         9.71 o
  -9   1  14         20.27         13.59        10.24 o
  -8   1  14         53.93         45.86        17.87 o
  -7   1  14         80.02         86.95        11.73 o
  -6   1  14          0.71         -8.33         8.33 o
  -5   1  14         34.56         29.48         9.64 o
  -4   1  14         34.15         48.53        11.46 o
  -3   1  14         58.25         84.87        12.38 o
  -2   1  14        158.77        165.42        17.47 o
  -1   1  14         15.69         12.33        12.03 o
   0   1  14          1.83        -14.81        14.81 o
   1   1  14        126.78        171.59        17.78 o
   2   1  14         12.96         27.19        22.59 o
   3   1  14          6.42         -7.74        11.20 o
   4   1  14         19.50        -13.75        13.75 o
   5   1  14          0.15         -4.85        21.25 o
   6   1  14          0.04          5.21        12.78 o
   7   1  14          0.43         -8.50        13.53 o
   8   1  14          2.19        -11.56        19.17 o
   9   1  14          1.17        -14.78        17.05 o
  10   1  14          2.66         -6.51        22.88 o
  11   1  14          5.73        -27.38        27.38 o
 -20   2  14          8.36        -12.35        19.77 o
 -19   2  14          0.00        -25.20        25.20 o
 -18   2  14          0.23        -18.45        18.45 o
 -17   2  14          0.26         -0.33        16.97 o
 -16   2  14         12.51        -10.47        10.47 o
 -15   2  14         38.82         45.20        18.92 o
 -14   2  14         48.61         77.42        18.84 o
 -13   2  14         12.25        -17.97        17.97 o
 -12   2  14         55.40         31.10        13.68 o
 -11   2  14        194.63        248.56        26.30 o
 -10   2  14         15.78         10.11        11.39 o
  -9   2  14         45.85         30.80        15.40 o
  -8   2  14         91.94         62.04        14.60 o
  -7   2  14         68.84         70.70        13.12 o
  -6   2  14         36.68         28.65        12.36 o
  -5   2  14         47.99         65.04        16.79 o
  -4   2  14         39.46         20.16        10.97 o
  -3   2  14        482.40        521.97        28.75 o
  -2   2  14         23.84          6.00        11.19 o
  -1   2  14         42.53         19.28        15.41 o
   0   2  14         12.64         15.09        10.82 o
   1   2  14        186.07        200.50        27.48 o
   2   2  14         27.92         15.38        12.36 o
   3   2  14         16.30         15.54        14.60 o
   4   2  14          5.95        -12.53        12.53 o
   5   2  14          3.47         -2.45        18.30 o
   6   2  14          3.14         -1.93        12.26 o
   7   2  14         19.85         25.36        14.05 o
   8   2  14         27.11         31.29        15.45 o
   9   2  14          1.39        -17.18        17.18 o
  10   2  14         15.21         26.07        18.83 o
 -19   3  14          0.13         -1.02        22.07 o
 -18   3  14          0.14        -18.24        18.24 o
 -17   3  14          1.96        -41.11        41.11 o
 -16   3  14          0.02        -16.73        16.73 o
 -15   3  14          5.59         -5.33        16.35 o
 -14   3  14         13.94          6.62        18.09 o
 -13   3  14          1.88        -16.68        16.68 o
 -12   3  14          0.21        -10.04        13.38 o
 -11   3  14         19.83         19.77        14.21 o
 -10   3  14        103.67        137.09        19.86 o
  -9   3  14          7.68         -2.82        11.37 o
  -8   3  14          4.66        -11.69        11.69 o
  -7   3  14          1.35         -5.20        12.64 o
  -6   3  14         33.48         33.05        13.94 o
  -5   3  14         10.37         -3.66        16.10 o
  -4   3  14         30.44         63.76        21.37 o
  -3   3  14         17.87         10.49        13.45 o
  -2   3  14         10.67        -14.06        14.06 o
  -1   3  14          2.49          5.19        11.59 o
   0   3  14          6.96        -13.46        13.46 o
   1   3  14          6.47         -0.81        11.97 o
   2   3  14         21.71         15.70        13.00 o
   3   3  14          0.07        -15.82        15.82 o
   4   3  14         15.91         11.56        15.15 o
   5   3  14          8.81         11.02        14.61 o
   6   3  14          0.06        -14.36        14.36 o
   7   3  14         14.94         19.02        14.78 o
   8   3  14          7.60         12.86        15.27 o
   9   3  14          0.00        -14.97        14.97 o
 -17   4  14          1.02        -20.24        20.24 o
 -16   4  14          2.58        -11.38        19.29 o
 -15   4  14          3.97        -20.05        20.05 o
 -14   4  14          0.46        -16.11        16.11 o
 -13   4  14          0.03          8.75        19.43 o
 -12   4  14         10.92          9.12        18.91 o
 -11   4  14          0.79          6.39        12.79 o
 -10   4  14          0.12        -13.64        13.64 o
  -9   4  14          0.21        -13.29        13.29 o
  -8   4  14         15.48         -8.98        14.45 o
  -7   4  14         27.03         19.40        14.79 o
  -6   4  14         20.68         32.43        15.02 o
  -5   4  14         31.39         39.10        14.96 o
  -4   4  14          8.33         -3.21        14.67 o
  -3   4  14         20.48         -2.07        20.63 o
  -2   4  14         35.19         37.14        15.19 o
  -1   4  14          3.73        -12.38        12.38 o
   0   4  14         25.39         31.87        15.11 o
   1   4  14         30.98         45.06        17.04 o
   2   4  14          0.47          6.75        21.25 o
   3   4  14          4.80        -15.66        15.66 o
   4   4  14          0.26         -0.87        20.12 o
   5   4  14          5.29        -14.00        14.00 o
   6   4  14          0.13        -25.90        25.90 o
   7   4  14          0.21         -6.61        15.02 o
 -13   5  14          1.14        -18.54        18.54 o
 -12   5  14          0.03         -7.24        28.70 o
 -11   5  14          0.51         17.23        27.68 o
 -10   5  14          3.08        -18.34        18.34 o
  -9   5  14          2.13        -15.83        15.83 o
  -8   5  14          3.46          1.56        15.58 o
  -7   5  14          2.33        -12.16        23.37 o
  -6   5  14          0.07        -27.35        27.35 o
  -5   5  14          0.62          6.84        18.09 o
  -4   5  14         11.46         32.25        17.58 o
  -3   5  14          4.19         -7.75        15.62 o
  -2   5  14          6.89         20.98        16.51 o
  -1   5  14         14.15         18.95        16.53 o
   0   5  14          0.05        -10.27        15.53 o
   1   5  14         16.62        -14.83        18.44 o
   2   5  14          5.61         -7.47        17.71 o
   3   5  14          1.73        -13.34        13.34 o
   4   5  14          6.15        -18.80        18.80 o
 -20   1  15          1.99        -20.69        21.23 o
 -19   1  15          0.03        -18.94        18.94 o
 -18   1  15          2.38        -12.96        12.96 o
 -17   1  15          3.61        -19.48        19.48 o
 -16   1  15         13.37          9.26        18.61 o
 -15   1  15        147.17        150.68        25.90 o
 -14   1  15         21.47        -10.79        14.87 o
 -13   1  15          6.51         13.85        11.87 o
 -12   1  15         38.56         49.49        20.00 o
 -11   1  15        407.32        382.55        28.59 o
 -10   1  15         21.07         25.50        14.67 o
  -9   1  15        132.59        127.77        17.25 o
  -8   1  15        261.75        333.42        24.39 o
  -7   1  15        175.21        148.22        31.73 o
  -6   1  15          7.25          8.02        11.64 o
  -5   1  15          1.49         -8.59        10.36 o
  -4   1  15          0.05         -8.45        10.39 o
  -3   1  15        228.07        211.99        20.77 o
  -2   1  15         37.70         43.28        12.63 o
  -1   1  15        218.41        280.27        21.15 o
   0   1  15         25.42          4.96        11.05 o
   1   1  15         22.71         -8.49        11.86 o
   2   1  15          3.88        -11.32        11.32 o
   3   1  15         22.44        -23.20        23.20 o
   4   1  15          7.93          3.01        14.23 o
   5   1  15          0.60        -14.55        14.55 o
   6   1  15         15.40          8.05        13.31 o
   7   1  15          4.94        -15.09        15.09 o
   8   1  15         22.59         35.96        15.28 o
   9   1  15          0.13        -16.59        16.59 o
  10   1  15          0.00         26.12        23.46 o
 -19   2  15          0.82        -24.79        24.79 o
 -18   2  15          3.03         30.79        19.96 o
 -17   2  15          6.54          0.85        17.60 o
 -16   2  15          2.38         -6.50        18.27 o
 -15   2  15          8.70        -15.72        15.72 o
 -14   2  15          2.75          5.02        17.03 o
 -13   2  15          1.05        -14.39        14.39 o
 -12   2  15          2.05        -13.26        13.26 o
 -11   2  15          1.31         -5.79        12.83 o
 -10   2  15         28.42         20.85        15.11 o
  -9   2  15          2.00        -11.26        11.26 o
  -8   2  15         13.76         15.22        12.39 o
  -7   2  15         26.26         34.94        14.34 o
  -6   2  15         54.03         60.98        14.28 o
  -5   2  15         90.90         84.71        13.44 o
  -4   2  15          7.68         -7.65        10.68 o
  -3   2  15          3.27        -10.40        10.40 o
  -2   2  15         83.20        116.04        16.87 o
  -1   2  15         12.18         10.97        11.43 o
   0   2  15         34.58         32.01        11.57 o
   1   2  15         69.23         58.31        18.56 o
   2   2  15         46.38         18.94        17.87 o
   3   2  15         20.93         37.34        13.55 o
   4   2  15         19.97         42.11        16.29 o
   5   2  15          2.88          0.25        15.22 o
   6   2  15         10.15          9.94        15.35 o
   7   2  15         13.93         -3.81        14.88 o
   8   2  15          5.49          2.29        19.94 o
   9   2  15          0.07         -7.14         7.14 o
 -18   3  15          0.09          0.60        23.33 o
 -17   3  15          8.83         10.00        35.16 o
 -16   3  15          3.14         -3.19        17.35 o
 -15   3  15          9.33         -2.35        16.02 o
 -14   3  15          0.08        -15.09        15.09 o
 -13   3  15          0.31          2.53        16.31 o
 -12   3  15          0.11        -13.54        13.54 o
 -11   3  15          5.53         24.71        17.84 o
 -10   3  15          0.31         -2.82        14.05 o
  -9   3  15         11.12         18.28        15.59 o
  -8   3  15         45.31         32.54        14.27 o
  -7   3  15          3.44        -12.75        12.75 o
  -6   3  15          3.68        -14.77        14.77 o
  -5   3  15         71.95         59.95        14.06 o
  -4   3  15         25.04         16.67        13.68 o
  -3   3  15         76.39         88.15        18.17 o
  -2   3  15         81.04         96.41        16.95 o
  -1   3  15          0.20          0.87        12.40 o
   0   3  15          0.03        -15.35        15.35 o
   1   3  15          0.04        -13.69        13.69 o
   2   3  15         16.02         -0.13        16.91 o
   3   3  15          5.76        -13.68        13.68 o
   4   3  15          1.41        -15.74        15.74 o
   5   3  15          5.05        -16.87        16.87 o
   6   3  15         14.70         -3.50        15.43 o
   7   3  15         11.08         -0.11        15.56 o
 -16   4  15          2.13        -25.12        25.12 o
 -15   4  15         13.51        -10.47        20.91 o
 -14   4  15          0.55        -24.92        24.92 o
 -13   4  15          2.63         16.68        16.01 o
 -12   4  15          0.43        -16.02        16.02 o
 -11   4  15          0.02         -9.12        14.89 o
 -10   4  15          1.94        -14.45        14.45 o
  -9   4  15          7.31        -11.96        13.97 o
  -8   4  15          0.18        -18.89        23.14 o
  -7   4  15          0.67        -33.14        33.14 o
  -6   4  15          0.73        -14.48        14.48 o
  -5   4  15          0.54         -8.14        12.87 o
  -4   4  15          4.67        -14.13        14.13 o
  -3   4  15          2.52         -2.07        18.20 o
  -2   4  15          0.01         -3.65        14.12 o
  -1   4  15          0.38         18.00        14.95 o
   0   4  15          4.77         -7.20        15.75 o
   1   4  15         16.80        -24.57        24.57 o
   2   4  15          1.96         -0.71        18.18 o
   3   4  15          2.16        -16.43        16.43 o
   4   4  15          2.59        -13.40        13.40 o
   5   4  15          1.75        -17.72        17.72 o
 -12   5  15          0.44        -20.17        20.17 o
 -11   5  15          5.31        -10.14        10.14 o
 -10   5  15          5.83        -18.60        18.60 o
  -9   5  15          3.62        -21.18        21.18 o
  -8   5  15          2.25         -7.56         7.56 o
  -7   5  15          0.69        -16.49        16.49 o
  -6   5  15          0.23        -19.24        19.24 o
  -5   5  15          2.18        -15.48        15.48 o
  -4   5  15          4.36          3.94        16.32 o
  -3   5  15          0.53        -15.88        16.48 o
  -2   5  15          4.04        -15.88        15.88 o
  -1   5  15          1.57        -16.86        16.86 o
   0   5  15          0.05        -17.45        17.45 o
   1   5  15          0.39         -6.14        17.44 o
 -19   0  16          0.42          8.57        39.21 o
 -18   0  16          2.93         -9.90        43.40 o
 -17   0  16         10.32        -23.88        24.61 o
 -16   0  16         20.38          7.31        26.35 o
 -15   0  16         30.44         47.22        29.14 o
 -14   0  16          0.22        -23.14        23.14 o
 -13   0  16          1.13         -6.01        34.62 o
 -12   0  16         55.07         30.50        22.53 o
 -11   0  16         13.63         14.09        20.18 o
 -10   0  16          3.04        -20.09        20.22 o
  -9   0  16         88.06        107.13        22.17 o
  -8   0  16         15.87         49.40        20.11 o
  -7   0  16         68.24         16.85        22.24 o
  -6   0  16        139.82        174.80        31.35 o
  -5   0  16        297.94        316.67        37.75 o
  -4   0  16          3.70         17.78        16.56 o
  -3   0  16          1.10          1.67        19.61 o
  -2   0  16         55.80         70.96        22.82 o
  -1   0  16         41.39          5.12        29.33 o
   0   0  16         42.60         77.24        21.93 o
   1   0  16         76.59         59.22        21.50 o
   2   0  16         26.91         11.26        22.22 o
   3   0  16         21.36         52.24        28.53 o
   4   0  16         20.41        -18.50        45.25 o
   5   0  16         11.04         -6.26        27.95 o
   6   0  16         17.55          6.27        24.60 o
   7   0  16          0.16         -1.63        32.18 o
   8   0  16         13.94        -18.91        24.09 o
 -19   1  16          0.35          0.51        25.64 o
 -18   1  16          0.15        -19.99        19.99 o
 -17   1  16          1.26        -21.52        21.52 o
 -16   1  16          0.80        -16.91        16.91 o
 -15   1  16         12.08        -10.08        15.96 o
 -14   1  16          0.86         -4.83        14.63 o
 -13   1  16          8.14        -14.77        14.77 o
 -12   1  16          1.94         12.37        13.71 o
 -11   1  16          0.86         -3.20        15.47 o
 -10   1  16          4.13         19.78        16.17 o
  -9   1  16          0.02        -10.15        12.32 o
  -8   1  16          1.91        -10.42        12.07 o
  -7   1  16         30.17         53.88        15.34 o
  -6   1  16          8.35         19.29        13.22 o
  -5   1  16         95.39         87.56        16.50 o
  -4   1  16         16.06          1.95        17.72 o
  -3   1  16          2.54        -10.86        12.99 o
  -2   1  16         88.25         69.37        15.10 o
  -1   1  16          0.12        -11.86        11.86 o
   0   1  16         32.34         21.85        12.80 o
   1   1  16          0.19         -4.99        12.55 o
   2   1  16          0.00        -14.45        14.45 o
   3   1  16          0.13        -14.04        14.04 o
   4   1  16          3.00        -15.42        18.53 o
   5   1  16          0.02         -8.94        14.04 o
   6   1  16          3.23        -13.74        13.74 o
   7   1  16          0.96        -11.31        15.76 o
   8   1  16          2.27         29.11        21.54 o
 -18   2  16          0.06        -18.57        24.98 o
 -17   2  16          0.74          0.58        21.34 o
 -16   2  16          0.74          8.09        27.76 o
 -15   2  16          0.41        -10.64        10.64 o
 -14   2  16          1.05         -5.21        15.36 o
 -13   2  16          2.24         -6.11        15.45 o
 -12   2  16          1.73          7.25        20.23 o
 -11   2  16         29.83          2.37        24.93 o
 -10   2  16         33.30         34.85        16.37 o
  -9   2  16         42.92         32.00        23.02 o
  -8   2  16         29.62         13.02        16.67 o
  -7   2  16          0.58        -14.21        15.50 o
  -6   2  16          4.83         -9.10        12.90 o
  -5   2  16         24.76         15.93        17.18 o
  -4   2  16         46.35         35.38        13.33 o
  -3   2  16         57.39         30.11        15.58 o
  -2   2  16         42.69         23.71        12.88 o
  -1   2  16         56.99         65.52        23.98 o
   0   2  16          1.92        -10.82        10.82 o
   1   2  16          0.62        -13.82        13.82 o
   2   2  16          1.59        -14.01        14.01 o
   3   2  16          4.17        -14.20        14.20 o
   4   2  16          0.08        -14.69        14.69 o
   5   2  16          1.15        -18.53        18.53 o
   6   2  16          7.07          0.05        13.50 o
   7   2  16          5.27        -11.50        16.22 o
 -17   3  16          2.52         -2.30        22.11 o
 -16   3  16          0.80         -4.99        17.95 o
 -15   3  16          8.64          8.65        18.29 o
 -14   3  16          1.49        -19.95        19.95 o
 -13   3  16          5.43         -1.56        17.57 o
 -12   3  16          0.20         -1.18        14.37 o
 -11   3  16          0.49        -11.25        15.19 o
 -10   3  16         18.01         29.58        19.73 o
  -9   3  16         34.56         36.42        15.61 o
  -8   3  16          0.96        -13.10        13.10 o
  -7   3  16          2.26          5.87        12.61 o
  -6   3  16          0.56        -14.11        14.11 o
  -5   3  16          0.46        -14.61        14.61 o
  -4   3  16          0.71        -13.48        13.48 o
  -3   3  16          6.28         -5.85        12.98 o
  -2   3  16          2.26        -12.25        17.03 o
  -1   3  16          1.26        -12.69        12.69 o
   0   3  16          4.85        -14.44        14.44 o
   1   3  16          6.36        -19.07        19.24 o
   2   3  16          3.05          2.12        21.29 o
   3   3  16          0.43        -15.67        15.67 o
   4   3  16          0.36        -16.07        16.07 o
   5   3  16          4.02         -7.03        17.89 o
 -14   4  16          2.53          4.99        25.82 o
 -13   4  16         10.88          8.68        18.47 o
 -12   4  16          7.24          2.31        16.30 o
 -11   4  16          1.14        -15.70        15.70 o
 -10   4  16          7.40        -17.04        17.04 o
  -9   4  16         11.40          0.21        13.77 o
  -8   4  16          0.82        -17.61        17.61 o
  -7   4  16          1.19        -17.97        17.97 o
  -6   4  16          0.89        -14.66        14.66 o
  -5   4  16          1.61         -8.69        23.30 o
  -4   4  16          1.10        -13.65        13.65 o
  -3   4  16          0.07        -14.47        14.47 o
  -2   4  16          2.53        -14.69        14.69 o
  -1   4  16          1.50        -12.07        15.98 o
   0   4  16          0.03        -16.83        16.83 o
   1   4  16          0.91        -11.90        16.73 o
   2   4  16          0.17        -18.41        18.41 o
   3   4  16          2.28        -12.67        18.07 o
  -8   5  16         10.69        -11.45        15.77 o
  -7   5  16          2.34         -4.23        25.00 o
  -6   5  16          0.29        -17.84        17.84 o
  -5   5  16          0.49        -15.39        15.39 o
  -4   5  16          2.21        -15.92        17.51 o
  -3   5  16          0.70        -16.73        16.73 o
 -18   1  17          0.00        -16.78        24.36 o
 -17   1  17          0.76        -15.14        21.70 o
 -16   1  17          0.66         -3.41        17.42 o
 -15   1  17          1.00        -17.31        17.31 o
 -14   1  17          0.54        -14.76        17.72 o
 -13   1  17         20.98         20.12        22.21 o
 -12   1  17          3.04        -10.10        14.13 o
 -11   1  17          7.82          9.56        15.91 o
 -10   1  17         14.20         10.08        16.05 o
  -9   1  17         47.48         20.22        16.33 o
  -8   1  17         51.90         78.26        17.60 o
  -7   1  17          0.80        -13.21        13.21 o
  -6   1  17          1.90        -10.86        14.29 o
  -5   1  17          0.79         -8.73        12.95 o
  -4   1  17         10.04          4.88        14.45 o
  -3   1  17          2.59        -13.73        13.73 o
  -2   1  17          9.10         12.99        11.27 o
  -1   1  17        110.48        124.83        18.90 o
   0   1  17         23.95         -3.88        14.88 o
   1   1  17          0.55        -13.58        13.58 o
   2   1  17          0.81        -12.98        12.98 o
   3   1  17          7.52          4.34        13.99 o
   4   1  17          4.00          4.45        15.88 o
   5   1  17          5.84        -14.58        14.58 o
   6   1  17         10.90         19.15        15.22 o
 -17   2  17          4.98          0.78        23.23 o
 -16   2  17          1.38        -18.87        18.87 o
 -15   2  17          0.00         42.89        21.45 o
 -14   2  17          3.63        -22.16        22.16 o
 -13   2  17         25.59         -0.89        33.27 o
 -12   2  17          2.40        -16.66        16.66 o
 -11   2  17          9.23         -4.25        16.99 o
 -10   2  17         50.58         40.43        23.66 o
  -9   2  17         36.74         55.30        16.12 o
  -8   2  17          0.00        -13.48        13.48 o
  -7   2  17          0.50        -10.49        14.03 o
  -6   2  17          0.98        -13.18        13.18 o
  -5   2  17          8.02          7.99        11.34 o
  -4   2  17         20.75          6.91        15.19 o
  -3   2  17          7.93        -10.54        11.33 o
  -2   2  17          2.12        -13.16        13.16 o
  -1   2  17         37.08         48.06        14.47 o
   0   2  17          7.56         11.96        22.09 o
   1   2  17          0.02          1.58        13.69 o
   2   2  17          0.84        -13.82        13.82 o
   3   2  17          1.23         -4.67        14.87 o
   4   2  17          3.58         16.83        16.03 o
   5   2  17          0.94          0.25        19.42 o
 -15   3  17          4.51         14.16        17.87 o
 -14   3  17          0.30        -17.90        17.90 o
 -13   3  17          1.15         -6.37        20.98 o
 -12   3  17          4.04        -14.73        17.75 o
 -11   3  17          4.80        -25.36        25.36 o
 -10   3  17          0.11        -12.59        16.39 o
  -9   3  17          0.30        -16.02        16.02 o
  -8   3  17          0.00        -15.84        15.84 o
  -7   3  17          9.79        -13.51        13.51 o
  -6   3  17          4.83        -12.97        12.97 o
  -5   3  17          2.72        -12.79        12.79 o
  -4   3  17          3.95          3.64        13.32 o
  -3   3  17          0.89        -12.81        12.81 o
  -2   3  17          3.71         20.59        14.31 o
  -1   3  17          0.88         22.07        22.48 o
   0   3  17          8.92         16.64        15.37 o
   1   3  17          0.84        -21.42        21.42 o
   2   3  17          2.30        -13.40        17.93 o
   3   3  17          1.14         13.45        16.67 o
 -12   4  17          0.91         -0.63        19.28 o
 -11   4  17          2.17        -17.06        17.06 o
 -10   4  17          0.37        -16.24        16.24 o
  -9   4  17          0.00        -23.48        23.48 o
  -8   4  17          8.18         -1.72        26.00 o
  -7   4  17          5.24        -16.77        16.77 o
  -6   4  17          0.94         -2.79        14.18 o
  -5   4  17          1.78          7.45        22.00 o
  -4   4  17          4.39          0.08        20.04 o
  -3   4  17          1.33         10.88        15.20 o
  -2   4  17          0.88        -15.14        15.14 o
  -1   4  17          2.63        -18.01        18.01 o
   0   4  17          5.11        -18.89        20.49 o
 -17   0  18          0.18         11.37        27.59 o
 -16   0  18          3.74        -23.61        23.61 o
 -15   0  18         28.43         23.35        28.95 o
 -14   0  18          2.48        -11.45        52.00 o
 -13   0  18          8.05         29.41        47.25 o
 -12   0  18          0.00         44.89        35.61 o
 -11   0  18          4.62         26.08        23.92 o
 -10   0  18         22.11         11.14        27.80 o
  -9   0  18          0.47        -24.16        39.58 o
  -8   0  18         39.31         57.17        29.92 o
  -7   0  18         10.56         28.65        23.21 o
  -6   0  18          5.94         -4.93        20.64 o
  -5   0  18         40.11        -23.94        23.94 o
  -4   0  18         59.91         51.73        32.06 o
  -3   0  18         11.62         22.26        22.58 o
  -2   0  18          5.25         -0.73        49.90 o
  -1   0  18          5.58         -5.99        19.88 o
   0   0  18         12.54         16.95        39.29 o
   1   0  18          0.65        -20.27        20.27 o
   2   0  18          0.72        -16.64        24.35 o
   3   0  18          0.03        -22.32        22.32 o
   4   0  18          0.09        -19.30        19.30 o
 -16   1  18          2.69        -18.35        18.35 o
 -15   1  18          2.59        -17.63        17.63 o
 -14   1  18          0.56        -15.22        15.22 o
 -13   1  18          0.51          4.01        18.16 o
 -12   1  18          0.79          6.96        17.86 o
 -11   1  18         18.26         25.07        18.43 o
 -10   1  18          5.75         29.42        17.41 o
  -9   1  18          3.87         -0.59        16.75 o
  -8   1  18          0.76        -15.14        15.14 o
  -7   1  18         18.49        -10.98        14.67 o
  -6   1  18         66.52         53.27        27.56 o
  -5   1  18          2.76        -14.60        14.60 o
  -4   1  18         29.56          3.00        11.97 o
  -3   1  18          0.37        -12.15        12.15 o
  -2   1  18          1.02         10.24        14.14 o
  -1   1  18          1.84        -17.57        17.57 o
   0   1  18          0.43         10.90        16.72 o
   1   1  18          0.00         -8.72        14.94 o
   2   1  18          0.55         -6.85        18.78 o
   3   1  18          0.00         -1.44        16.53 o
   4   1  18          0.00          1.93        20.20 o
 -15   2  18          5.10        -20.35        22.11 o
 -14   2  18          3.15         25.34        19.59 o
 -13   2  18          4.88        -17.42        18.31 o
 -12   2  18          6.08          3.19        26.90 o
 -11   2  18          2.37         21.40        16.59 o
 -10   2  18          9.19          0.77        16.48 o
  -9   2  18          0.09        -14.28        15.81 o
  -8   2  18          0.53        -12.46        21.84 o
  -7   2  18          1.97        -16.16        16.16 o
  -6   2  18          5.82        -13.15        13.15 o
  -5   2  18          1.91          4.25        15.13 o
  -4   2  18          2.07        -14.44        14.44 o
  -3   2  18         10.51         18.04        17.18 o
  -2   2  18          0.61        -15.69        15.69 o
  -1   2  18          0.28        -17.06        17.06 o
   0   2  18          5.96          9.33        18.40 o
   1   2  18         12.30          6.05        28.36 o
   2   2  18          0.01        -18.35        18.35 o
   3   2  18         13.83        -14.63        14.63 o
 -13   3  18          0.01        -19.01        19.01 o
 -12   3  18          0.94        -19.31        19.31 o
 -11   3  18          3.51        -13.65        15.50 o
 -10   3  18          0.49         -7.09        16.34 o
  -9   3  18          1.73         11.69        17.18 o
  -8   3  18         14.38         -0.04        19.57 o
  -7   3  18         39.85         22.30        18.61 o
  -6   3  18          5.81        -30.54        30.54 o
  -5   3  18          0.54        -39.29        39.29 o
  -4   3  18          4.70        -13.68        15.26 o
  -3   3  18         11.48          8.96        15.01 o
  -2   3  18          2.68          1.77        17.83 o
  -1   3  18          1.96        -13.37        15.91 o
   0   3  18         11.38         -8.58        16.41 o
 -14   1  19          3.89          6.88        20.17 o
 -13   1  19         16.64         45.56        21.12 o
 -12   1  19         39.09         19.90        18.60 o
 -11   1  19          0.02        -18.31        18.31 o
 -10   1  19         11.97        -11.64        26.34 o
  -9   1  19          0.94        -16.79        16.79 o
  -8   1  19          0.02        -10.65        17.27 o
  -7   1  19          3.41        -11.72        16.84 o
  -6   1  19         34.06         69.99        18.99 o
  -5   1  19          1.10        -14.84        14.84 o
  -4   1  19         17.88         15.97        20.11 o
  -3   1  19         23.83         14.16        16.21 o
  -2   1  19          3.49         -7.68        15.96 o
  -1   1  19          2.15        -17.62        17.62 o
   0   1  19          0.82          1.25        16.92 o
   1   1  19          0.63        -16.59        16.59 o
 -13   2  19          1.95        -20.10        20.10 o
 -12   2  19          1.23         -9.49        19.97 o
 -11   2  19          5.13        -14.27        17.38 o
 -10   2  19          0.79        -12.36        15.76 o
  -9   2  19          1.10          8.83        17.02 o
  -8   2  19          2.60        -16.92        16.92 o
  -7   2  19          0.96        -18.43        18.43 o
  -6   2  19          1.31         -2.51        16.89 o
  -5   2  19          3.16        -11.47        15.55 o
  -4   2  19          0.13        -10.08        23.89 o
  -3   2  19          0.18         -8.71        19.07 o
  -2   2  19          1.05        -22.06        22.06 o
  -1   2  19          0.72         -7.00        17.75 o
  -8   3  19          2.11        -13.43        20.25 o
  -7   3  19          3.43        -11.80        24.06 o
  -6   3  19          1.78        -16.97        17.21 o
  -5   3  19          0.45        -13.12        15.93 o
 -12   0  20          0.83        -15.70        39.83 o
 -11   0  20          7.64        -12.70        48.68 o
 -10   0  20          2.72        -22.98        22.98 o
  -9   0  20         97.29        158.15        42.60 o
  -8   0  20         19.55         30.87        35.25 o
  -7   0  20          0.22        -27.45        27.45 o
  -6   0  20          6.94         15.26        31.54 o
  -5   0  20          0.38        -16.91        16.91 o
  -4   0  20         16.23        -27.15        30.26 o
  -3   0  20         14.45          8.25        59.02 o
  -2   0  20          0.02        -26.27        35.99 o
 -11   1  20          0.15         14.11        21.15 o
 -10   1  20          1.44        -11.03        19.21 o
  -9   1  20         11.79        -19.54        19.54 o
  -8   1  20          3.91         -6.89        20.87 o
  -7   1  20          6.59         -8.28        18.98 o
  -6   1  20          1.59        -20.40        20.40 o
  -5   1  20          0.04         -2.66        16.69 o
  -4   1  20          1.61          6.73        29.01 o
  -3   1  20          1.19         -1.09        18.94 o
                                                
